# Supplementary material for: Small non-coding RNAs have predicted roles in reproductive biology and transposable element regulation in the parasitic worm Strongyloides venezuelensis
Source: Research Square preprint supplement (doi:10.21203/rs.3.rs-5828314/v1), 2025-04-23
Supplement: Supplementary file 1 [file 1844262c38a4a33d914f56c7.xlsx]

## Sheet: unitas_reads
Table X1 - Expression profile data of RppH-treated and monophosphate libraries. sRNA expression based on RPM (reads per million) in a) RppH-treated and b) 5'pN enriched libraries for two - three replicates of (A) parasitic females (PF), (B) free-living females (FLF), (C) free-living iL3s (iL3), (D) 'activated' iL3s ('activated' iL3) and (E) eggs collected from parasitic females. sRNAs originating…
a) RppH-treated library															b) 5'pN enrcihed library
PF1	18	19	20	21	22	23	24	25	26	27	28	29	30		PF1	18	19	20	21	22	23	24	25	26	27	28	29	30
rRNA	67.9847	95.1653	76.5191	79.981	33.4818	25.4619	37.439	29.3563	28.5298	32.9224	30.4898	23.5506	16.9883		rRNA	62.4146	83.3053	64.7203	126.192	53.2106	41.2724	54.7257	50.6708	42.1679	63.622	65.8825	68.5645	52.1667
tRNA	295.404	800.902	378.015	524.332	1545.07	116.622	169.656	221.259	308.168	759.926	650.533	518.204	563.093		tRNA	318.021	506.551	316.923	771.13	3314.34	146.881	175.334	182.174	180.389	492.909	500.281	452.532	440.871
miRNA	545.461	2274.95	10426.7	46522.8	107138	107419	8742.83	275.167	16.25	5	7	1	0.5		miRNA	337.919	1797.43	8735.43	39567.1	110726	100098	6888.83	165.167	8	2.5	4	1	2
Gene	1533.36	1549.75	3276.3	7573.85	6455.63	30564.8	2966.7	5288.93	16740	55984.5	35561.1	10029.6	2545.24		Gene	1239.61	1319.21	3238.21	7248.63	6064.59	45773.2	1544.48	1042.93	1389.81	2733.55	1855.92	988.576	809.785
5'UTR	255.834	238.092	243.708	493.195	352.126	1423.62	530.016	614.657	1953.79	6379.73	5157.61	1076.83	321.432		5'UTR	144.938	151.986	183.355	277.16	187.072	1096.92	133.118	117.333	442.46	1655.05	1991.39	184.263	133.066
3'UTR	333.264	849.581	1212.13	3347.8	2128.34	659.638	1064.6	2709.02	9490.95	31770.5	21670.3	6488.73	1615.48		3'UTR	238.995	223.501	302.565	791.113	764.137	589.225	366.991	375.286	432.003	1007.86	588.327	333.147	195.723
TE	473.69	426.562	564.616	1312.05	1133.68	1536.28	2707.76	4434.6	6423.33	14247.5	9544.93	2896.07	728.271		TE	223.104	513.01	901.791	2519.69	1925.79	354.059	242.522	448.435	1020.17	1721.51	1563.2	708.918	261.388
intergenic regions	1355	1600	2508	4932	9892	15666	25471	45907	84980	224248	154680	58302	23616		intergenic regions	589	583	1046	2206	6034	7169	3190	1994	2806	6984	5428	3501	2299
Total	4922	7887	18720	64825	128701	157428	41717	59518	120002	333552	227380	79371	29419		Total	3171	5192	14801	53533	129077	155276	12608	4385	6342	14673	12001	6241	4194
% of raw reads	0.386512	0.619345	1.47003	5.09053	10.1065	12.3624	3.27592	4.67379	9.42344	26.1929	17.8555	6.23279	2.3102		% of raw reads	0.752324	1.23181	3.51156	12.7008	30.6237	36.8394	2.99126	1.04035	1.50465	3.48119	2.84725	1.48069	0.995032
PF2	18	19	20	21	22	23	24	25	26	27	28	29	30		PF2	18	19	20	21	22	23	24	25	26	27	28	29	30
rRNA	41.2773	68.5115	68.6647	82.7232	31.946	10.6667	24.1194	21.7154	17.0116	24.6452	20.7987	19.7641	13.0265		rRNA	150.268	192.395	139.182	243.064	86.9308	75.3055	114.037	90.1323	92.1867	139.364	127.911	123.758	83.2532
tRNA	215.387	589.357	291.255	443.874	1316.89	74.4626	116.179	154.091	225	522.397	375.488	312.708	305.292		tRNA	594.042	1013.54	591.568	1481.92	6709.15	238.918	303.127	262.972	279.617	660.506	790.113	691.796	685.796
miRNA	417.867	1824.4	8131.84	35608.9	82057	81528.4	6634	229	9.5	7.5	3.5	0	0		miRNA	785.205	3713.43	18153.3	79777.2	219125	200950	15064.7	339.417	19.6667	7.5	4.83333	5	7
Gene	1154.06	1144.36	2486.5	5868.87	4926.06	24260.8	2209.63	3818.29	12399.7	41445.9	26105.5	7456.87	1861.06		Gene	2306.82	2561.62	6295.96	14424.9	11798.8	91500.2	2969.48	1873.51	2820.25	5407.23	3836.75	1846.05	1492.78
5'UTR	185.264	210.888	201.26	346.405	334.402	1132.44	407.627	502.651	1401.4	4719.22	3685.5	805.671	221.354		5'UTR	273.457	264.646	296.7	564.97	368.791	2279.35	267.939	222.155	897.962	3309.18	4063.72	411.713	246.483
3'UTR	338.161	338.91	395.331	974.867	852.978	1218.84	2064.24	3410.03	4807.69	10589.8	7037.52	2146.54	526.606		3'UTR	497.735	487.064	641.746	1642.18	1465.96	1122.06	753.799	719.223	949.411	2025.95	1248.16	649.319	363.989
TE	258.988	651.577	965.15	2719.38	1694.72	517.428	803.202	1961.22	7177.74	23685.5	15762.7	4571.45	1141.67		TE	469.468	1077.31	1827.54	5400.8	3915.09	653.89	465.951	729.59	2005.9	3551.28	3124.53	1336.37	426.699
intergenic regions	1097	1291	1977	3887	7701	12138	19782	34905	64216	166772	114995	42883	17252		intergenic regions	1224	1141	2076	4676	12171	14274	6211	4057	6071	15157	11695	6928	4360
Total	3747	6170	14560	49962	98931	120897	32070	45032	90305	247849	168047	58218	21328		Total	6339	10490	30059	108281	255670	311128	26168	8316	13163	30277	24902	11999	7668
% of raw reads	0.391489	0.644645	1.52124	5.22006	10.3364	12.6314	3.35069	4.70497	9.43512	25.8954	17.5576	6.08265	2.22836		% of raw reads	0.750657	1.24221	3.55955	12.8225	30.2762	36.8434	3.09879	0.984771	1.55875	3.58537	2.94887	1.42091	0.908036
FLF1	18	19	20	21	22	23	24	25	26	27	28	29	30		FLF1	18	19	20	21	22	23	24	25	26	27	28	29	30
rRNA	147.36	262.448	135.094	409.19	148.427	62.4521	147.625	88.7424	126.045	186.4	141.481	100.499	52.7865		rRNA	75.1769	127.045	76.7627	329.536	94.1679	45.725	86.4724	37.6382	63.2205	86.2134	56.2538	43.225	19.1192
tRNA	1993.36	943.322	773.198	1198.02	3290.54	935.17	3692.5	5545.46	7569.37	9458.38	7759.45	6254.44	5475.63		tRNA	2811.73	1376.19	1027.22	1666.46	4034.85	1141.06	5709.65	8162.09	9082.85	9484.74	9115.87	7120	7802.64
miRNA	382.463	888.443	7040.02	61822.8	260850	204216	6880.86	360.333	66.2381	31.4	12.5	6.75	2.5		miRNA	526.505	1354.61	11261.2	102559	444869	289102	11454.2	253.5	17.5	3.58333	7.75	4.75	9
Gene	3339.64	2888.47	3645.37	9996.8	9273.52	93713.3	15816.2	32022.1	79942.7	205473	93653.3	23013.6	6186.91		Gene	2755.04	2350.44	3899.28	12408.4	9328.74	124925	4087.97	2505.66	1783.27	4677.39	3596.83	2062.7	1734.51
5'UTR	317.854	366.341	410.299	1689.82	1171.71	5307.88	1553.9	3006.04	6832.98	16374.3	9132.65	2317.52	777.395		5'UTR	228.328	287.945	332.786	2342.9	1004.61	5828.78	259.563	109.746	117.665	343.379	1697.4	272.141	249.861
3'UTR	943.652	1004.56	1329.08	2148.18	2718.66	6572.4	17058.2	38702.5	41029.7	54437	25844.4	6797.13	1587.9		3'UTR	521.248	508.731	694.85	1757.96	1555.52	1606.38	978.869	867.385	655.246	595.849	319.1	337.894	169.64
TE	1154.66	1214.41	1213.94	2033.2	2311.51	3386.55	7970.67	17174.8	46307.9	116052	58841.2	16268	5378.88		TE	862.97	892.044	746.863	1425.41	1223.23	1500.24	2718.3	2742.98	5058.25	983.847	1176.8	1819.29	2296.23
intergenic regions	4033	5502	8530	14305	36685	82095	219600	496347	588871	858192	437584	148351	64078		intergenic regions	1413	1693	2841	5686	24289	22732	17036	7555	4964	3081	1915	1305	1785
Total	12455	13179	23200	93742	316562	396417	272890	593461	771017	1.26079e+06	633258	203237	83591		Total	9212	8609	20900	128197	486421	446905	42355	22259	21768	19283	17913	12994	14096
% of raw reads	0.266486	0.281976	0.496384	2.00569	6.77312	8.48169	5.83872	12.6976	16.4966	26.9757	13.5491	4.34843	1.7885		% of raw reads	0.736423	0.688218	1.67078	10.2483	38.8853	35.7263	3.38593	1.77942	1.74017	1.54152	1.432	1.03876	1.12686
FLF2	18	19	20	21	22	23	24	25	26	27	28	29	30		FLF2	18	19	20	21	22	23	24	25	26	27	28	29	30
rRNA	165.088	263.554	114.237	408.309	207.358	97.3814	212.743	139.898	149.906	196.532	178.588	135.747	37.5977		rRNA	107.225	169.88	67.2128	381.606	191.029	97.3938	207.223	94.5415	97.297	119.838	76.9544	70.4692	22.1701
tRNA	2738.9	1867.94	2133.42	2911.71	5402.33	2890.9	6129.91	9545.96	8363.71	12276.5	11029.5	7490.62	5358.04		tRNA	4312.49	2904.64	2938.1	4563.18	7248.11	4486.35	10926.3	17136	12685.7	15573.8	14707.9	9484.47	7372.48
miRNA	203.763	485.164	3645.4	31794.4	137450	99159.3	3331.83	181.5	52.25	25	5.5	1.5	3		miRNA	275.356	656.195	5483.33	53677.4	230820	143622	5585.14	126.167	7.5	3.5	7.75	2.75	2.5
Gene	9753.93	9261.09	6579.37	10686.4	9995.15	45107.4	13550.5	24582.7	54786.6	131651	59720	17868.4	6886.97		Gene	14459.4	14762.8	8222.49	14046.2	12018.7	65950.3	8451.08	7661.04	5867.03	9520.78	8086.73	5407.75	4639.03
5'UTR	2047.23	1080.56	780.795	1486.17	1209.92	2016.79	1499.12	2373.44	4779.35	10395	6716.31	1946.99	1002.16		5'UTR	3347.18	1711.42	996.23	1937.99	1211.89	2234.44	916.52	763.177	684.93	823.294	2611.59	743.733	845.516
3'UTR	1962.24	1861.69	2103.32	3024.73	3035.79	5412.38	12533	27086.9	28185.9	34288.9	16373.6	4975.45	1934.65		3'UTR	2763.31	2484.19	2544.24	3592.43	2991.4	2833.31	2648.61	2688.11	2395.95	1844.13	1627.37	1573.71	1248.57
TE	1278.85	1346.01	1371.46	1942.29	2614.38	3359.85	7240.81	13460.6	30980.3	70655.3	34526.4	10547.3	4101.58		TE	1571.02	1498.92	1282.41	1945.19	2452.83	2528.5	5789.16	6509	6774.56	1210.65	1459.71	2161.12	2297.73
intergenic regions	3271	4355	6653	10472	22066	54321	146911	324416	388175	538614	271287	103866	52167		intergenic regions	2145	2735	3604	5276	13841	15732	14109	9263	7960	4730	3352	2993	4569
Total	21421	20631	23506	62840	182102	212462	191547	401941	515670	798444	400031	146962	71529		Total	29054	27031	25224	85572	270882	237599	48751	44316	36541	33896	31970	22481	21032
% of raw reads	0.702538	0.676629	0.77092	2.06095	5.97235	6.96806	6.28211	13.1823	16.9123	26.1863	13.1197	4.81987	2.34592		% of raw reads	3.17756	2.95631	2.75868	9.35879	29.6257	25.9856	5.33177	4.84673	3.9964	3.70712	3.49648	2.45869	2.30022
FLF3	18	19	20	21	22	23	24	25	26	27	28	29	30		FLF3	18	19	20	21	22	23	24	25	26	27	28	29	30
rRNA	120.797	205.353	121.357	320.855	117.4	65.6866	113.268	91.7531	105.77	166.52	147.592	85.2302	39.5753		rRNA	99.3542	166.344	79.0072	391.146	109.5	65.1218	117.303	58.2029	73.8115	111.154	65.7996	55.228	19.3987
tRNA	3910.15	3241.66	2529.81	3295.2	5161.24	3289.3	10138.9	22412.7	15571.8	20596.9	12702.7	10077.5	8860.24		tRNA	8485.7	6494.17	4793.3	6441.43	9049.57	6292.64	21822.2	43233.4	27316.9	28685.3	22496.1	14674.1	13433.2
miRNA	254.104	679.281	5656.05	43748.8	175796	149508	4653.5	209	42.1	28.6667	6	3	4.16667		miRNA	501.847	1432.6	11795.1	96479	435424	268761	10701.8	182.333	13.1667	5	3	1.25	2.5
Gene	5239.73	4757.43	5245.92	10083	9353.32	69957	14516.5	27457	57519.8	133343	60078.6	17124.4	5860.93		Gene	7411.56	6870.92	7245.84	15088.6	13195.3	119981	7956.3	7946.06	4195.37	12986.8	8464.52	4451.46	3223.51
5'UTR	609.304	547.753	539.033	1252.98	986.468	3299.85	1325.72	2395.46	4850.26	10193.2	6487.82	1769.13	956.936		5'UTR	861.907	769.76	687.948	2076.09	1152.29	5278.68	602.995	368.736	378.495	746.886	2911.25	607.752	523.75
3'UTR	1446.75	1633.89	1870.78	2241.06	2435.12	4823.63	11555.1	25091	26374.3	33020.3	15699.7	4404.81	1388.57		3'UTR	1446.84	1614.02	1591.59	2732.7	2585.93	2488.53	2023.37	2362.02	1498.21	1184.91	879.466	856.311	654.338
TE	2029.17	2182.63	1977.05	2701.1	3242.25	3906.47	10902	20693.1	36296	69538.9	34847.6	11702.9	5229.58		TE	3124.8	3107.19	2316.21	3324.02	3395.74	3459	11558.1	16181.3	14497.1	1868.02	2570.85	3895.9	4185.34
intergenic regions	4433	5463	8084	12139	25723	53142	137092	298470	369168	517495	263914	98295	48848		intergenic regions	2663	2874	4453	7975	23089	22044	18504	9237	6896	4728	2961	2118	3411
Total	18179	18811	26121	75884	222901	288082	190416	396942	510070	784683	394064	143543	71223		Total	24695	23416	33070	134680	488117	428464	73384	79626	54901	50341	40372	26673	25465
% of raw reads	0.57878	0.598901	0.831636	2.41598	7.09668	9.1719	6.06243	12.6378	16.2395	24.9826	12.5461	4.5701	2.26758		% of raw reads	1.66498	1.57874	2.22963	9.08034	32.9096	28.8877	4.94767	5.36851	3.70151	3.39407	2.72195	1.79834	1.71689
iL3-1	18	19	20	21	22	23	24	25	26	27	28	29	30		iL3-1	18	19	20	21	22	23	24	25	26	27	28	29	30
rRNA	29.791	53.9824	51.1637	36.4576	18.514	17.5053	20.2667	14.7105	17.0704	18.4881	16.9099	18.5583	13.2395		rRNA	47.8328	83.7113	67.1797	104.216	55.6909	47.3987	38.2574	46.5397	46.0047	54.7733	63.0442	55.1516	32.8257
tRNA	283.435	338.211	227.494	524.583	2009.3	59.4745	75.3172	80.8774	89.8195	169.237	126.919	126.122	106.838		tRNA	487.08	404.567	348.557	1118.45	3716.81	150.048	154.951	185.609	148.927	357.251	309.861	294.195	245.651
miRNA	217.283	537.9	4966.9	32824.2	199360	59203.7	6227.17	185.5	6.5	5.5	3	2	4		miRNA	260.456	818.033	9496.7	62401.4	457096	125072	11363	333.833	29.8333	9	6	6.5	4.5
Gene	7436.59	836.49	1404.47	3893.55	3351.82	22085.3	2468.44	3976.8	6755.44	4049.6	2220.83	1073.76	621.559		Gene	17676.1	1261.59	2532.43	7056.95	6604.6	58724.1	5464.4	8424.47	13036.3	3130.77	1588.27	1435.39	1183.15
5'UTR	99.5786	99.9643	93.7804	235.068	432.031	1051.43	186.753	365.949	280.606	719.997	1463.36	238.464	90.3122		5'UTR	101.102	117.258	115.982	190.218	162.552	1310.26	127.558	86.1286	112.712	866.729	3245.08	203.067	153.417
3'UTR	243.583	202.815	189.739	402.923	315.959	303.792	248.584	288.11	701.369	964.21	811.038	517.338	151.228		3'UTR	251.459	258.24	301.549	651.627	491.037	418.96	339.346	315.057	521.044	420.139	373.035	518.689	301.776
TE	151.737	287.637	149.45	174.199	120.107	113.877	228.47	448.049	1104.19	2128.97	1774.94	996.758	552.824		TE	253.952	344.599	178.599	274.125	173.534	114.131	128.483	221.365	376.151	461.342	500.71	305.011	143.677
intergenic regions	605	541	700	1209	3549	5928	2406	2767	5339	9981	6919	3251	1725		intergenic regions	733	597	792	1764	5474	7179	2822	1138	886	1132	1057	952	1662
Total	9077	2924	7804	39332	209164	88782	11872	8132	14301	18047	13337	6226	3268		Total	19822	3913	13843	73613	473778	193042	20447	10758	15166	6433	7146	3770	3727
% of raw reads	2.09986	0.676435	1.80537	9.09903	48.3878	20.5387	2.74646	1.88125	3.30838	4.17498	3.08537	1.44032	0.756016		% of raw reads	2.34453	0.462826	1.63734	8.70688	56.038	22.8328	2.41845	1.27245	1.79382	0.760889	0.845222	0.445912	0.440826
iL3-2	18	19	20	21	22	23	24	25	26	27	28	29	30		iL3-2	18	19	20	21	22	23	24	25	26	27	28	29	30
rRNA	25.8441	60.2578	27.8337	31.8404	11.3507	12.4145	13.6683	9.14968	10.3227	22.6486	16.0041	13.7171	2.21538		rRNA	42.6797	52.0471	38.0312	94.1044	45.2958	27.6368	42.983	30.3394	40.219	49.906	63.9466	52.3851	20.3899
tRNA	247.434	238.286	196.912	346.818	1586.64	85.5924	107.645	107.094	120.638	217.683	192.674	174.454	151.711		tRNA	438.348	345.038	305.653	787.699	3342.26	155.248	233.418	304.772	271.283	679.011	721.491	433.126	501.035
miRNA	159.867	381.433	3020.3	19790.9	115306	34944.8	3130.33	81.8333	7.5	2	1	0.333333	1		miRNA	209.3	636.1	7005.4	46613.4	322798	89200.7	7708.83	222.333	23	4.75	3	1	1
Gene	5180.1	737.586	838.975	2016.25	1934.46	14775.9	1170.03	1846.13	2603.56	1744.04	968.965	597.952	329.022		Gene	13805.6	995.482	1750.29	4621.46	4306.06	40710.4	2374.41	3620.69	5219.57	1840.85	1151.73	972.357	824.296
5'UTR	96.7087	84.1851	96.5071	167.845	405.934	922.465	155.556	343.884	208.483	261.973	544.431	91.8544	70.4065		5'UTR	110.605	98.2041	102.801	176.043	131.995	1249.4	106.179	76.7	81.7472	434.383	1424.82	139.167	116.12
3'UTR	192.527	130.876	129.367	306.368	217.709	206.208	145.508	181.149	383.772	441.796	419.502	323.085	82.3599		3'UTR	202.864	200.013	243.652	576.594	414.896	367.741	232.575	205.897	548.232	320.011	291.467	598.308	194.056
TE	159.523	221.375	131.105	137.006	78.4334	92.5881	133.257	234.761	486.726	872.857	1220.42	848.604	622.286		TE	207.577	264.114	156.173	213.745	175.991	91.8504	165.606	219.274	339.948	315.089	368.548	316.658	175.102
intergenic regions	478	385	389	669	2282	3921	1139	1259	2243	3872	2768	1304	682		intergenic regions	641	432	530	1038	3659	5954	1601	759	712	775	669	573	1064
Total	6558	2264	4842	23505	121830	54986	6003	4066	6069	7437	6133	3356	1942		Total	15667	3053	10140	54215	334880	137796	12473	5439	7237	4420	4697	3086	2897
% of raw reads	2.63383	0.90927	1.94465	9.4401	48.9295	22.0835	2.41093	1.63299	2.43744	2.98685	2.46314	1.34784	0.779948		% of raw reads	2.62869	0.512248	1.70134	9.09648	56.1879	23.1201	2.09279	0.912584	1.21426	0.741611	0.788087	0.517785	0.486074
activated' iL3-1	18	19	20	21	22	23	24	25	26	27	28	29	30		activated' iL3-1	18	19	20	21	22	23	24	25	26	27	28	29	30
rRNA	1274.98	951.347	948.266	711.889	583.459	899.155	524.03	383.343	309.961	272.857	259.364	258.624	196.739		rRNA	1290.54	994.334	1087.89	852.816	773.628	1165.39	745.102	550.126	463.929	463.301	476.541	559.307	389.459
tRNA	2665.8	2575.4	3016	2959.41	2725.91	2417.23	1770.5	1224.57	1094.09	1654.5	1364.96	1352.73	1035.32		tRNA	2423.53	2494.63	3352.06	3624.89	3108.98	2741.42	2014.15	1466.48	1294.87	2178.53	1976.96	1509.92	1152.53
miRNA	138.317	255.576	1318.49	5852.64	16224.4	7015.07	621.5	29	4	2.5	1	0	1.5		miRNA	136.054	259.171	1454.5	7567.1	21153.1	9022.7	553.5	16	4	2	1	1.5	2.5
Gene	12552.8	10536.6	10058.9	9672.35	9162.23	10128.1	7684.84	6437.34	5622.62	5294.79	4742.12	4310.56	3286.36		Gene	11850.1	10305.3	11394	12356.6	11548.9	13893.4	10417.7	9318.25	9118.63	8560.35	7987.09	7668.81	5829.58
5'UTR	2312.05	2130.6	1824.91	1688.22	1463.16	1441.97	1122.27	975.909	978.041	961.982	770.532	705.663	667.93		5'UTR	2066.02	2184.04	1888.11	1990.93	1847.39	1789.41	1550.73	1442.4	1463.78	1620.23	1324.67	1224.66	1143.93
3'UTR	2278.86	1923.03	1858.83	1876.98	1615.21	1716.19	1502.15	1424.44	1471.44	1251.94	1188.95	1121.76	889.779		3'UTR	2078.42	1891.78	1929.73	2079.42	2067.82	2318.25	2344.1	2055.42	2339.95	2284.35	2110.96	2001.78	2033.52
TE	2027.14	1715.41	1660.58	1509.52	1362.61	1312.31	1014.71	716.397	650.843	630.437	558.077	561.66	572.377		TE	1815.35	1683.75	1838.69	1845.24	1656.18	1438.42	1156.69	809.33	685.854	627.234	667.773	671.016	1035.48
intergenic regions	4512	4332	4369	3916	3785	4037	3073	2692	2599	2671	2247	1747	1612		intergenic regions	3737	3622	3861	3646	3772	4358	3272	2491	2428	2395	2286	2211	2191
Total	27773	24429	25077	28196	36929	28972	17320	13886	12741	12740	11132	10060	8263		Total	25404	23445	26811	33970	45937	36730	22060	18151	17800	18131	16832	15849	13779
% of raw reads	10.7849	9.48633	9.73796	10.9491	14.3404	11.2505	6.72574	5.39224	4.94762	4.94723	4.3228	3.90652	3.20871		% of raw reads	8.06735	7.44524	8.51416	10.7876	14.5879	11.6641	7.00542	5.76407	5.65261	5.75772	5.34521	5.03304	4.37569
activated' iL3-2	18	19	20	21	22	23	24	25	26	27	28	29	30		activated' iL3-2	18	19	20	21	22	23	24	25	26	27	28	29	30
rRNA	1072.62	785.613	781.895	611.29	481.053	728.308	415.678	356.927	301.403	241.283	256.359	255.582	186.132		rRNA	1216.22	1005.48	1174.33	906.208	811.875	1190.24	765.593	602.506	580.491	459.21	523.031	541.569	448.165
tRNA	1803.86	1593.01	1643.42	1784.38	1879.44	1574.95	1204.99	809.692	780.526	1227.25	1088.49	997.878	886.243		tRNA	1972.98	1939.4	2355.27	2657.66	2835.96	2072.09	1713.93	1260.93	1059.54	1853.31	2035.39	1320.1	1293.45
miRNA	177.421	630.157	3006.15	12083	33496.9	14670.8	1187.14	54.3333	4.5	2	1	0	0		miRNA	255.759	792.138	4862.86	20686.5	59624	23245.4	1485.17	51.8333	5	3.66667	0	1	1.5
Gene	11097.8	8754.8	8742.79	8671.24	7935.45	11746.7	6807.2	5744.73	5399.51	5426.69	4645.17	3984.79	3051.42		Gene	14692.4	11842.2	12841.4	13850.8	12714.5	21693.7	11249.8	10436.3	10177.5	9736.26	9237.24	7785.27	6122.42
5'UTR	1911.3	1861.94	1501.17	1427.73	1267.73	1198.01	944.782	761.844	827.852	811.954	653.635	615.847	516.824		5'UTR	2512.43	2739.02	2104.42	2297.48	2000.23	1919.7	1630.06	1489.97	1571.58	1553.27	1433.62	1217.79	1125.68
3'UTR	1799.48	1564.33	1410.6	1387.02	1302.74	1285.49	1219.28	1020.61	1125.67	1068.92	1050.11	909.381	859.241		3'UTR	2454.44	2178.16	2019.51	2200.06	2080.22	2167.15	2401.83	2014.66	2315.05	2086.9	2262.06	1945.28	2174.54
TE	1601.54	1238.15	1114.97	1080.34	1008.69	992.681	747.928	570.862	570.538	571.907	529.243	476.526	506.136		TE	1812.8	1656.57	1623.21	1636.3	1665.14	1352.7	1095.58	826.838	768.869	609.379	711.657	656.99	1141.24
intergenic regions	4192	3566	3640	3263	3468	3858	2799	2357	2576	2777	2141	1711	1538		intergenic regions	5139	4328	4660	4337	4762	5478	3912	2689	2909	2857	2611	2685	2623
Total	23670	20007	21851	30321	50848	36060	15328	11678	11588	12129	10366	8951	7545		Total	30078	26496	31657	48580	86500	59126	24259	19374	19390	19161	18816	16153	14931
% of raw reads	9.09189	7.68489	8.39319	11.6466	19.5312	13.851	5.88764	4.48564	4.45107	4.65887	3.98169	3.43817	2.89811		% of raw reads	7.25609	6.39196	7.63701	11.7196	20.8675	14.2637	5.8523	4.67383	4.67769	4.62244	4.53922	3.89679	3.60199
egg1	18	19	20	21	22	23	24	25	26	27	28	29	30		egg1	18	19	20	21	22	23	24	25	26	27	28	29	30
rRNA	698.607	797.912	900.331	693.589	408.047	477.417	468.863	538.749	439.881	420.154	357.832	344.779	411.265		rRNA	945.462	936.825	1278.46	1113.46	684.81	768.572	644.897	820.862	663.468	676.979	676.697	595.919	803.492
tRNA	1423.45	1533.81	1192.64	1107.68	1761.44	1018.78	1000.07	878.893	1091.67	1341.32	782.069	480.824	523.902		tRNA	1874.73	2069.39	1499.74	1635.24	2585.34	1324.49	1404.2	1270.36	1508.43	2627.04	1186.22	757.411	817.737
miRNA	54.9719	182.633	2383.49	16883.2	60732	18188.3	350.5	6.83333	1	3.5	0	1	1		miRNA	56.9148	246	3642.87	26310.1	100256	27727.4	491.5	11	1.5	0	1	1	0
Gene	12624.2	10893.2	11194.9	10065.6	9978.04	16603.8	7483.4	6074.28	6710.98	6780.81	5334.2	4151.64	2681.14		Gene	17625.4	14749.8	16041.3	14663.5	15346.1	28415.8	12212.9	9730.53	11594.3	8163.75	5832.31	5580.93	4011.33
5'UTR	1652.89	1573.06	1225.9	1534.3	1314.32	1489.57	918.821	928.398	917.517	954.279	823.115	689.831	450.5		5'UTR	2458.99	2575.55	2111.78	2903.28	2276.9	2502.22	1805.71	1408.96	1461.43	1441.42	1033.42	1030.17	769.944
3'UTR	1080.71	1153.19	945.656	880.577	802.268	751.008	745.104	781.19	916.845	1311.59	1240.39	955.347	634.292		3'UTR	1906.62	1597.31	1867.59	1466	1309.58	1118.18	1201.81	1168.03	1179.55	1043.68	1244.12	1174.69	1159.5
TE	1009.23	1244.22	1130.07	961.04	773.921	718.094	736.243	771.657	957.1	1878.35	1884.4	1293.58	940.903		TE	1181.88	1442.15	1393.23	1275.4	1007.22	916.403	893.945	877.262	749.373	701.126	704.228	584.884	761.001
intergenic regions	2314	1715	1913	1905	4084	5990	1698	2059	3808	9083	7561	3722	1920		intergenic regions	2603	1878	1936	2099	5448	5361	1659	1064	1176	1159	1065	1011	1033
Total	20872	19113	20903	34052	79859	45250	13409	12046	14850	21780	17992	11644	7565		Total	28663	25505	29780	51486	128919	68139	20317	16356	18339	15814	11743	10738	9356
% of raw reads	6.53608	5.98525	6.54579	10.6634	25.0079	14.1701	4.19904	3.77221	4.65029	6.82042	5.63421	3.64633	2.36899		% of raw reads	6.58685	5.86113	6.84354	11.8316	29.626	15.6586	4.66891	3.75866	4.21436	3.63411	2.69858	2.46763	2.15004
egg2	18	19	20	21	22	23	24	25	26	27	28	29	30		egg2	18	19	20	21	22	23	24	25	26	27	28	29	30
rRNA	873.528	869.115	977.354	725.646	395.23	477.983	461.064	472.342	356.416	338.312	288.066	283.63	325.307		rRNA	1057.75	1046.61	1453.66	1267.5	708.015	842.975	798.885	956.57	694.74	703.487	727.998	738.067	944.15
tRNA	1768.3	1645.01	1258.33	1148.28	1653.18	1058.56	1181	1193.17	1380.41	1173.03	850.858	648.442	722.479		tRNA	2049.75	2195.36	1561.43	1749.47	2743.45	1453.09	1813.05	2072.64	2182.21	2000.68	1512.42	1050.5	1230.47
miRNA	57.992	201.676	2532.89	14274	43853	15575.7	385.833	9.5	0	2	0	1	0		miRNA	49.092	249.119	3725.53	22573.8	75865	22855.4	425.833	9.66667	1.5	1	3	3	0
Gene	15072.7	11875.6	11123.9	9563.1	8923.44	15672.4	8168.61	6735.97	8560.37	8969.25	7102.66	5823.17	4030.76		Gene	24747.2	18142.5	18286.1	17044.9	16699.2	29145.1	15726.2	13629.6	19975.2	13299.1	10617.3	10702.8	7761.92
5'UTR	1352.72	1302.23	1070.63	1320.53	1140.38	1367.69	779.785	909.576	785.352	961.612	913.341	656.356	527.659		5'UTR	2212.37	2269.96	1949.78	2756.92	2160.84	2385.23	1600.57	1307.65	1461.18	1433.24	1208.61	1174.85	1072.34
3'UTR	1477.3	1451.04	1431.88	1257.21	1124.21	1149.34	1187.98	1140.81	1295.29	1908.99	2012.57	1341.93	1050.42		3'UTR	1923.08	1875.05	2056.19	1833.68	1670.63	1721.3	2018.2	2119.86	2353.19	2199.69	2605.77	2591.09	2833.99
TE	1453.51	1514.29	1262.05	1113.22	885.557	838.398	926.726	924.639	1288.17	2730.81	2804.51	1669.47	1107.38		TE	1430.73	1652.44	1605.36	1423.69	1198.86	1049.96	1278.25	1217.01	1052.94	771.782	789.92	782.69	962.135
intergenic regions	3822	2912	2997	3145	5441	5398	2643	2894	5609	13349	11209	5636	2895		intergenic regions	4142	3021	3347	3451	7455	5951	3117	2118	2384	2495	2463	2495	2383
Total	25921	21807	22682	32587	63432	41561	15746	14289	19282	29443	25191	16070	10661		Total	37626	30462	33989	52120	108509	65415	26791	23433	30109	22908	19931	19541	17190
% of raw reads	7.65372	6.43897	6.69734	9.62199	18.7296	12.2718	4.64934	4.21913	5.69341	8.69366	7.43817	4.745	3.14788		% of raw reads	7.70987	6.24191	6.96462	10.6798	22.2344	13.4041	5.48969	4.80161	6.16957	4.69403	4.08402	4.00411	3.52237
