# Supplementary material for: Small non-coding RNAs have predicted roles in reproductive biology and transposable element regulation in the parasitic worm Strongyloides venezuelensis
Source: Research Square preprint supplement (doi:10.21203/rs.3.rs-5828314/v1), 2025-04-23
Supplement: Supplementary file 3 [file 1dd7f8d529757ee0f2811c58.xlsx]

## Sheet: Sheet1
SI Table X7 - 26-29Cs in parasitic and free-living females Table showing the numbers and % of sRNAs a) derived from and b) targeting genes, 3’UTR, 5’UTR, TEs, tRNAs or rRNAs. Top rows indicate map frequency with majority of reads mapping once (1x) and some mapping more than once (>1x) and bottom row indicates proportion of reads. c) Genes and protein descriptions of upregulated 26-29Cs and d) gen…
a) targets
		1x	>1x		1x	>1x		1x	>1x		1x	>1x		1x	>1x		1x	>1x
sRNA class	Reads	Gene			3'UTR			5'UTR			TE			tRNA			rRNA
free-living	4	1	2		0	4		0	0		0	0		0	0		0	0
parasitic	75	7	13		8	0		1	2		29	12		0	0		0	0
%		1x	>1x	Tot	1x	>1x	Tot	1x	>1x	Tot	1x	>1x	Tot	1x	>1x	Tot	1x	>1x	Tot
sRNA class	Reads	Gene			3'UTR			5'UTR			TE			tRNA			tRNA
free-living	4	25	50	75	0	100	100	0	0	0	0	0	0	0	0	0	0	0	0
parasitic	75	9.33333	17.3333	26.6667	10.6667	0	10.6667	1.33333	2.66667	4	38.6667	16	54.6667	0	0	0	0	0	0
b) protein descriptions										c) 26-29C GO terms BP-CC-MF targeting genes
free-living	Protein_Name				parasitic	Protein_Name				GO.ID	free-living	Annotated	Significant	Expected	Fis		GO.ID	parasitic	Annotated	Significant	Expected	Fis
SVE_0347000	ShKT domain-containing protein				SVE_0347000	ShKT domain-containing protein											GO:0000152	nuclear ubiquitin ligase complex	12	1	0	0.0038
SVE_0445600	Dynein heavy chain at 62B				SVE_1156300	unnamed protein product											GO:0005680	anaphase-promoting complex	12	1	0	0.0038
SVE_0665400	Histone-lysine N-methyltransferase SETMAR				SVE_2013700	unnamed protein product											GO:0031461	cullin-RING ubiquitin ligase complex	24	1	0.01	0.0076
SVE_0899400	Hypothetical protein SRAE_2000528100				SVE_0448400	---NA---											GO:0004177	aminopeptidase activity	32	1	0	0.0027
SVE_1040200	unnamed protein product				SVE_1152900	unnamed protein product											GO:0008238	exopeptidase activity	113	1	0.01	0.0096
SVE_1123200	C6 domain-containing protein
SVE_1124500	hypothetical protein Bm1_53495, partial
SVE_1156300	unnamed protein product									d) 26-29C GO terms BP-CC-MF targeting 3'UTRs
SVE_1401900	---NA---									GO.ID	free-living	Annotated	Significant	Expected	Fis		GO.ID	parasitic	Annotated	Significant	Expected	Fis
SVE_1995600	unnamed protein product																GO:0015985	energy coupled proton transport, down el...	29	1	0.01	0.0089
SVE_2013700	unnamed protein product																GO:0015986	ATP synthesis coupled proton transport	29	1	0.01	0.0089
SVE_0291600	---NA---																GO:0006754	ATP biosynthetic process	30	1	0.01	0.0092
SVE_0439500	hypothetical protein L596_026519																GO:0009144	purine nucleoside triphosphate metabolic...	32	1	0.01	0.0098
SVE_0535800	GDP-L-fucose synthase																GO:0009145	purine nucleoside triphosphate biosynthe...	32	1	0.01	0.0098
SVE_0733500	---NA---																GO:0009205	purine ribonucleoside triphosphate metab...	32	1	0.01	0.0098
SVE_1753400	Hypothetical predicted protein																GO:0009206	purine ribonucleoside triphosphate biosy...	32	1	0.01	0.0098
																	GO:0000276	mitochondrial proton-transporting ATP sy...	11	1	0	0.0023
																	GO:0005753	mitochondrial proton-transporting ATP sy...	13	1	0	0.0028
																	GO:0019773	proteasome core complex, alpha-subunit c...	14	1	0	0.003
																	GO:0045263	proton-transporting ATP synthase complex...	15	1	0	0.0032
																	GO:0045259	proton-transporting ATP synthase complex	25	1	0.01	0.0053
																	GO:0033177	proton-transporting two-sector ATPase co...	34	1	0.01	0.0072
																	GO:0005839	proteasome core complex	35	1	0.01	0.0074
