# Supplementary material for: Small non-coding RNAs have predicted roles in reproductive biology and transposable element regulation in the parasitic worm Strongyloides venezuelensis
Source: Research Square preprint supplement (doi:10.21203/rs.3.rs-5828314/v1), 2025-04-23
Supplement: Supplementary file 4 [file 2eda062511685142980f3570.xlsx]

## Sheet: Sheet1
parasitic																					SI Table X3 - 25-27Gs from parasitic or free-living females antisense targets Table showing the numbers and % of non-miRNA sRNAs targeting genes, 3’UTR, 5’UTR, TEs, tRNAs or rRNAs. Top rows indicate map frequency with majority of reads mapping once (1x) and some mapping more than once (>1x) and bottom row indicates proportion of reads.
		1x	>1x		1x	>1x		1x	>1x		1x	>1x		1x	>1x		1x	>1x
sRNA class	Reads	Gene			3'UTR			5'UTR			TE			tRNA			rRNA
25G	400	271	30		54	2		5	0		11	1		0	0		0	0
26G	809	399	118		95	17		32	1		29	39		0	0		0	0
27G	4562	1765	709		518	147		237	34		247	257		0	1		0	0
%		1x	>1x	Tot	1x	>1x	Tot	1x	>1x	Tot	1x	>1x	Tot	1x	>1x	Tot	1x	>1x	Tot
sRNA class	Reads	Gene			3'UTR			5'UTR			TE			tRNA			tRNA
25G	400	67.75	7.5	75.25	13.5	0.5	14	1.25	0	1.25	2.75	0.25	3	0	0	0	0	0	0
26G	809	49.3201	14.5859	63.9061	11.7429	2.10136	13.8443	3.9555	0.123609	4.07911	3.58467	4.82077	8.40544	0	0	0	0	0	0
27G	4562	38.6892	15.5414	54.2306	11.3547	3.22227	14.5769	5.19509	0.745287	5.94038	5.41429	5.63349	11.0478	0	0.0219202	0.0219202	0	0	0
free-living
		1x	>1x		1x	>1x		1x	>1x		1x	>1x		1x	>1x		1x	>1x
sRNA class	Reads	Gene			3'UTR			5'UTR			TE			tRNA			rRNA
25G	4470	3389	361		454	27		90	4		71	64		0	0		0	0
26G	4236	2489	589		479	77		162	15		133	184		1	0		0	0
27G	8207	2994	1629		1020	319		468	72		431	615		1	2		0	0
%		1x	>1x	Tot	1x	>1x	Tot	1x	>1x	Tot	1x	>1x	Tot	1x	>1x	Tot	1x	>1x	Tot
sRNA class	Reads	Gene			3'UTR			5'UTR			TE			tRNA			tRNA
25G	4470	75.8166	8.07606	83.8926	10.1566	0.604027	10.7606	2.01342	0.0894855	2.10291	1.58837	1.43177	3.02013	0	0	0	0	0	0
26G	4236	58.7583	13.9046	72.6629	11.3078	1.81775	13.1256	3.82436	0.354108	4.17847	3.13975	4.34372	7.48347	0.0236072	0	0.0236072	0	0	0
27G	8207	36.4811	19.8489	56.33	12.4284	3.88693	16.3153	5.70245	0.8773	6.57975	5.25161	7.4936	12.7452	0.0121847	0.0243694	0.0365542	0	0	0
adults
		1x	>1x		1x	>1x		1x	>1x		1x	>1x		1x	>1x		1x	>1x
sRNA class	Reads	Gene			3'UTR			5'UTR			TE			tRNA			rRNA
27G	15008	5206	2616		1831	521		799	127		842	1033		1	3		0	0
%		1x	>1x	Tot	1x	>1x	Tot	1x	>1x	Tot	1x	>1x	Tot	1x	>1x	Tot	1x	>1x	Tot
sRNA class	Reads	Gene			3'UTR			5'UTR			TE			tRNA			tRNA
27G	15008	34.6882	17.4307	52.1189	12.2002	3.47148	15.6716	5.32383	0.846215	6.17004	5.61034	6.883	12.4933	0.00666311	0.0199893	0.0266525	0	0	0
