# Supplementary material for: Small non-coding RNAs have predicted roles in reproductive biology and transposable element regulation in the parasitic worm Strongyloides venezuelensis
Source: Research Square preprint supplement (doi:10.21203/rs.3.rs-5828314/v1), 2025-04-23
Supplement: Supplementary file 5 [file 595da456392426fdccedf781.xlsx]

## Sheet: Sheet1
SI Table X4 - 25-26Gs sRNAs in parasitic and free-living females. Enriched GO terms associated with the predicted gene targets of significantly (Fis <0.01) upregulated 25 and 26Gs when targeting a) genes and b) 3UTRs in free-living females and c) in parastic females (divided by association with Biological Processes (BP), Cellular COmponents (CC) and Molecular Functions (MF). Unique terms highligh…
a) Free-living GO terms - Gene														b) Free-living GO terms - 3UTR														e) 25G protein descriptions
GO.ID	25Gs_BP	Annotated	Significant	Expected	Fis		GO.ID	26Gs_BP	Annotated	Significant	Expected	Fis		GO.ID	25Gs_BP	Annotated	Significant	Expected	Fis		GO.ID	26Gs_BP	Annotated	Significant	Expected	Fis		25G Gene	Protein_Name	25G 2'UTR	Protein_Name
GO:0022402	cell cycle process	155	20	3.54	3.1e-10		GO:0051276	chromosome organization	474	14	4.58	0.00017		GO:0071897	DNA biosynthetic process	290	5	0.81	0.0011		GO:0032366	intracellular sterol transport	2	1	0	0.0033		SVE_0852000	reverse transcriptase	SVE_0328800	---NA---
GO:0007049	cell cycle	213	22	4.86	2.9e-09		GO:0006325	chromatin organization	180	8	1.74	0.00034		GO:0019099	female germ-line sex determination	1	1	0	0.0028		GO:0032365	intracellular lipid transport	4	1	0.01	0.0066		SVE_1106600	---NA---	SVE_0723900	Reverse transcriptase domain and Integrase,catalytic core domain and Ribonuclease H-like domain and AT hook-like family and Aspartic peptidase domain-containing protein
GO:1903047	mitotic cell cycle process	107	15	2.44	1.8e-08		GO:0009892	negative regulation of metabolic process	281	10	2.72	0.00037		GO:0031293	membrane protein intracellular domain pr...	1	1	0	0.0028		GO:0015918	sterol transport	5	1	0.01	0.0082		SVE_1118300	Abnormal spindle-like microcephaly-associated protein	SVE_0852000	reverse transcriptase
GO:0000278	mitotic cell cycle	121	15	2.76	9.5e-08		GO:0048519	negative regulation of biological proces...	463	13	4.48	0.00048		GO:0033619	membrane protein proteolysis	1	1	0	0.0028									SVE_1463500	Reverse transcriptase domain and Integrase,catalytic core domain and Ribonuclease H-like domain and AT hook-like family and Aspartic peptidase domain-containing protein	SVE_1107000	Integrase, catalytic core domain and Ribonuclease H-like domain-containing protein
GO:0051276	chromosome organization	474	31	10.82	1e-07		GO:0010629	negative regulation of gene expression	147	7	1.42	0.00054		GO:0042001	hermaphrodite somatic sex determination	1	1	0	0.0028		GO.ID	26Gs_MF	Annotated	Significant	Expected	Fis		SVE_1463700	Reverse transcriptase domain and Integrase,catalytic core domain and Ribonuclease H-like domain and AT hook-like family and Aspartic peptidase domain-containing protein	SVE_1463600	Reverse transcriptase domain and Integrase,catalytic core domain and Ribonuclease H-like domain and AT hook-like family and Aspartic peptidase domain-containing protein
GO:0007059	chromosome segregation	61	11	1.39	1.1e-07		GO:0043967	histone H4 acetylation	4	2	0.04	0.00055		GO:0042004	feminization of hermaphrodite soma	1	1	0	0.0028									SVE_1912300	---NA---	SVE_1480800	Spectrin beta chain, erythrocytic
GO:0006996	organelle organization	953	46	21.76	6.3e-07		GO:0043968	histone H2A acetylation	4	2	0.04	0.00055		GO:0006278	RNA-dependent DNA biosynthetic process	261	4	0.72	0.0055		GO.ID	26Gs_CC	Annotated	Significant	Expected	Fis		SVE_1915000	---NA---	SVE_1926400	Reverse transcriptase domain and Integrase,catalytic core domain and Ribonuclease H-like domain and AT hook-like family and Aspartic peptidase domain-containing protein
GO:0098813	nuclear chromosome segregation	51	9	1.16	1.9e-06		GO:0030261	chromosome condensation	19	3	0.18	0.00076		GO:0007538	primary sex determination	2	1	0.01	0.0055		GO:0019773	proteasome core complex, alpha-subunit c...	14	1	0.01	0.0089		SVE_0072700	Hypothetical protein SRAE_1000014600	SVE_0614000	---NA---
GO:0000280	nuclear division	57	9	1.3	5e-06		GO:0007049	cell cycle	213	8	2.06	0.00103		GO:0007542	primary sex determination, germ-line	2	1	0.01	0.0055									SVE_0810200	AAA+ ATPase domain and ATPase, AAA-type, core domain and P-loop containing nucleoside triphosphate hydrolase domain-containing protein	SVE_1958200	---NA---
GO:0051301	cell division	59	9	1.35	6.7e-06		GO:0006417	regulation of translation	48	4	0.46	0.00115		GO:0018993	somatic sex determination	2	1	0.01	0.0055									SVE_1958200	---NA---	SVE_0331400	WD40 repeat and WD40/YVTN repeat-like-containing domain and WD40-repeat-containing domain-containing protein
GO:0140014	mitotic nuclear division	45	8	1.03	6.8e-06		GO:0034248	regulation of cellular amide metabolic p...	48	4	0.46	0.00115		GO:0030237	female sex determination	2	1	0.01	0.0055									SVE_0156400	histones H3 and H4-like protein	SVE_0547100	Hypothetical protein SRAE_2000195700
GO:0071840	cellular component organization or bioge...	1371	55	31.31	1.4e-05		GO:0006259	DNA metabolic process	1149	22	11.11	0.00116		GO:0070262	peptidyl-serine dephosphorylation	2	1	0.01	0.0055									SVE_1794000	Hypothetical protein SRAE_2000127400	SVE_1090100	Hypothetical protein SRAE_1000092400
GO:0048285	organelle fission	66	9	1.51	1.7e-05		GO:0010605	negative regulation of macromolecule met...	272	9	2.63	0.00123		GO:0000056	ribosomal small subunit export from nucl...	3	1	0.01	0.0083									SVE_0355900	ATP-dependent RNA helicase A isoform X1	SVE_1651900	---NA---
GO:0006403	RNA localization	40	7	0.91	2.9e-05		GO:0006338	chromatin remodeling	49	4	0.47	0.00125		GO:0023041	neuronal signal transduction	3	1	0.01	0.0083									SVE_0772100	Hypothetical protein SRAE_1000034900	SVE_0076000	---NA---
GO:0050657	nucleic acid transport	40	7	0.91	2.9e-05		GO:0031047	gene silencing by RNA	50	4	0.48	0.00134		GO:0030104	water homeostasis	3	1	0.01	0.0083									SVE_0808900	---NA---	SVE_0808900	---NA---
GO:0050658	RNA transport	40	7	0.91	2.9e-05		GO:0051726	regulation of cell cycle	126	6	1.22	0.00135																SVE_1914100	Hypothetical protein SRAE_1000050300	SVE_1859100	Hypothetical protein SRAE_2000314200
GO:0051236	establishment of RNA localization	40	7	0.91	2.9e-05		GO:0016458	gene silencing	53	4	0.51	0.00167		GO.ID	25Gs_MF	Annotated	Significant	Expected	Fis									SVE_0189500	CID domain and RNA polymerase II-binding domain-containing protein	SVE_0177600	Histone H1.0
GO:0051726	regulation of cell cycle	126	12	2.88	2.9e-05		GO:0016043	cellular component organization	1271	23	12.29	0.00187		GO:1901981	phosphatidylinositol phosphate binding	14	2	0.04	0.00056									SVE_0219200	JmjC domain-containing protein	SVE_0232200	Peptidase C48, SUMO/Sentrin/Ubl1 family-containing protein
GO:0016043	cellular component organization	1271	51	29.03	3.1e-05		GO:0071840	cellular component organization or bioge...	1371	24	13.26	0.00229		GO:0034061	DNA polymerase activity	278	5	0.71	0.00063									SVE_0439000	Acidic leucine-rich nuclear phosphoprotein 32 family member A	SVE_0321600	Protein CBG14685
GO:0007051	spindle organization	18	5	0.41	4e-05		GO:0006323	DNA packaging	28	3	0.27	0.00241		GO:0016779	nucleotidyltransferase activity	399	5	1.02	0.00311									SVE_0827400	Polybromo	SVE_0331500	Proteasome subunit alpha type-3
GO:0000070	mitotic sister chromatid segregation	43	7	0.98	4.7e-05		GO:0072350	tricarboxylic acid metabolic process	9	2	0.09	0.00319		GO:0004298	threonine-type endopeptidase activity	34	2	0.09	0.00336									SVE_0937500	Zinc finger, PHD-type domain and Zinc finger, FYVE/PHD-type domain and Zinc finger, RING/FYVE/PHD-type domain and Zinc finger, PHD-finger domain-containing protein	SVE_0388100	Hypothetical protein SRAE_2000237900
GO:0006325	chromatin organization	180	14	4.11	6.3e-05		GO:0034641	cellular nitrogen compound metabolic pro...	3387	46	32.75	0.00326		GO:0070003	threonine-type peptidase activity	34	2	0.09	0.00336									SVE_0952500	Aurora kinase B	SVE_0844800	Innexin family-containing protein
GO:0031401	positive regulation of protein modificat...	45	7	1.03	6.4e-05		GO:0016569	covalent chromatin modification	108	5	1.04	0.00387		GO:0003964	RNA-directed DNA polymerase activity	261	4	0.67	0.00414									SVE_1341600	Las1-like family-containing protein	SVE_0872300	Peptidase C2, calpain, catalytic domain and Peptidase C2, calpain, large subunit, domain III and Peptidase C2, calpain, domain III and Peptidase C2, calpain family-containing protein
GO:0007346	regulation of mitotic cell cycle	61	8	1.39	6.8e-05		GO:0016570	histone modification	108	5	1.04	0.00387		GO:0035091	phosphatidylinositol binding	42	2	0.11	0.00509									SVE_0072500	Hypothetical protein SRAE_1000014700	SVE_1645200	Reticulon domain containing protein
GO:0000226	microtubule cytoskeleton organization	64	8	1.46	9.6e-05		GO:0010608	posttranscriptional regulation of gene e...	67	4	0.65	0.00395		GO:0004370	glycerol kinase activity	2	1	0.01	0.0051									SVE_0102500	Hypothetical protein SRAE_X000151000	SVE_1798000	ATP synthase, H+ transporting, mitochondrial F0 complex, subunit g
GO:0000819	sister chromatid segregation	48	7	1.1	9.8e-05		GO:0006996	organelle organization	953	18	9.22	0.00407		GO:0017151	DEAD/H-box RNA helicase binding	2	1	0.01	0.0051									SVE_0163800	---NA---	SVE_1869200	sarcoplasmic/endoplasmic reticulum calcium ATPase 2
GO:0010467	gene expression	1876	66	42.84	0.0001		GO:0019222	regulation of metabolic process	1221	21	11.81	0.00561		GO:0050220	prostaglandin-E synthase activity	2	1	0.01	0.0051									SVE_0280600	Dbl homology (DH) domain and CRAL-TRIO domain and Pleckstrin homology-like domain-containing protein	SVE_1517300	Reverse transcriptase domain-containing protein
GO:0032270	positive regulation of cellular protein ...	83	9	1.9	0.00011		GO:0044260	cellular macromolecule metabolic process	4280	54	41.39	0.00588		GO:0016772	transferase activity, transferring phosp...	1395	9	3.56	0.00639									SVE_0331500	Proteasome subunit alpha type-3	SVE_1926500	---NA---
GO:0044267	cellular protein metabolic process	2340	78	53.44	0.00012		GO:0046483	heterocycle metabolic process	2973	40	28.75	0.00905		GO:0031490	chromatin DNA binding	3	1	0.01	0.00764									SVE_0407900	Zinc finger domain containing protein	SVE_0014600	Dynactin subunit 5
GO:0051247	positive regulation of protein metabolic...	84	9	1.92	0.00012		GO:0006725	cellular aromatic compound metabolic pro...	2974	40	28.76	0.0091																SVE_0504900	Ras-related protein Rab-5C	SVE_0679700	WD40 repeat and WD40/YVTN repeat-like-containing domain and WD40-repeat-containing domain-containing protein
GO:0009987	cellular process	8160	205	186.35	0.00014		GO:0060255	regulation of macromolecule metabolic pr...	1194	20	11.55	0.00926		GO.ID	25Gs_CC	Annotated	Significant	Expected	Fis									SVE_0513700	Trailer hitch	SVE_0341500	Maternal protein pumilio
GO:0007017	microtubule-based process	171	13	3.91	0.00014		GO:0010468	regulation of gene expression	956	17	9.24	0.00954		GO:0005635	nuclear envelope	40	3	0.09	8.9e-05									SVE_0549100	Zinc finger, PHD-type domain and Zinc finger, FYVE/PHD-type domain and Zinc finger, RING/FYVE/PHD-type domain and Zinc finger, PHD-finger domain-containing protein	SVE_1914400	Hypothetical protein SRAE_1000293900
GO:0050789	regulation of biological process	2716	87	62.03	0.00016		GO:0001702	gastrulation with mouth forming second	1	1	0.01	0.00967		GO:0019773	proteasome core complex, alpha-subunit c...	14	2	0.03	0.00042									SVE_0648500	Transcription factor AP-2	SVE_0156000	Sterile alpha motif domain and Sterile alpha motif, type 2 domain and Sterile alpha motif/pointed domain-containing protein
GO:0032268	regulation of cellular protein metabolic...	275	17	6.28	0.00018		GO:0001881	receptor recycling	1	1	0.01	0.00967		GO:0012505	endomembrane system	550	6	1.22	0.00097									SVE_0706400	General substrate transporter family and Major facilitator superfamily domain, general substrate transporter and Major facilitator superfamily domain-containing protein	SVE_0157800	Hypothetical protein SRAE_1000293300
GO:0019222	regulation of metabolic process	1221	47	27.88	0.00019		GO:0014041	regulation of neuron maturation	1	1	0.01	0.00967		GO:0031967	organelle envelope	246	4	0.55	0.00189									SVE_0796400	Integrator complex subunit 4	SVE_0162000	Hypothetical protein SRAE_1000308000
GO:0050794	regulation of cellular process	2453	80	56.02	0.0002		GO:0044648	histone H3-K4 dimethylation	1	1	0.01	0.00967		GO:0031975	envelope	246	4	0.55	0.00189									SVE_1052500	Hypothetical protein SRAE_X000151000	SVE_0325300	von Willebrand factor, type A domain-containing protein
GO:0007369	gastrulation	25	5	0.57	0.00022		GO:0051964	negative regulation of synapse assembly	1	1	0.01	0.00967		GO:0043226	organelle	3207	14	7.13	0.00221									SVE_1080900	Crossveinless c	SVE_0523900	Arfaptin homology (AH) domain and Arfaptin homology (AH) domain/BAR domain-containing protein
GO:0060255	regulation of macromolecule metabolic pr...	1194	46	27.27	0.00022		GO:0072553	terminal button organization	1	1	0.01	0.00967		GO:0005839	proteasome core complex	35	2	0.08	0.00268									SVE_1089600	RNA polymerase-associated protein Ctr9 homolog	SVE_0682300	kinase RLK-Pelle-LRR-III family
GO:0051246	regulation of protein metabolic process	284	17	6.49	0.00027		GO:1901889	negative regulation of cell junction ass...	1	1	0.01	0.00967		GO:0043227	membrane-bounded organelle	2594	12	5.77	0.00396									SVE_1092200	RuvB-like 1	SVE_0805600	Golgi phosphoprotein 3
GO:0010564	regulation of cell cycle process	79	8	1.8	0.00042		GO:1904799	regulation of neuron remodeling	1	1	0.01	0.00967		GO:0000784	nuclear chromosome, telomeric region	2	1	0	0.00444									SVE_1603400	DNA repair protein Rad51 homolog	SVE_0976300	Actin, alpha cardiac muscle 1
GO:0048598	embryonic morphogenesis	61	7	1.39	0.00045		GO:1905809	negative regulation of synapse organizat...	1	1	0.01	0.00967		GO:0042175	nuclear outer membrane-endoplasmic retic...	168	3	0.37	0.00581									SVE_1607800	Hypothetical protein SRAE_2000314200	SVE_0980700	Hrf1 family-containing protein
GO:0007129	synapsis	2	2	0.05	0.00052		GO:2000331	regulation of terminal button organizati...	1	1	0.01	0.00967		GO:0000781	chromosome, telomeric region	4	1	0.01	0.00886									SVE_1609700	Protein T28B8.1	SVE_0994900	Nucleoporin Nup88 family-containing protein
GO:0045143	homologous chromosome segregation	2	2	0.05	0.00052									GO:0000228	nuclear chromosome	67	2	0.15	0.00954									SVE_1629100	molybdenum cofactor synthesis domain protein	SVE_1021700	Serine/threonine-protein phosphatase 2A 65 kDa regulatory subunit A alpha
GO:0051028	mRNA transport	30	5	0.69	0.00053		GO.ID	26Gs_MF	Annotated	Significant	Expected	Fis																SVE_1725800	LYR motif-containing protein 4	SVE_1725900	Domain of unknown function DUF148 domain-containing protein
GO:0010629	negative regulation of gene expression	147	11	3.36	0.00053		GO:0005488	binding	8241	109	82.75	2.9e-09		c) Parasitic GO terms - Gene														SVE_1853300	CLaSPin homolog	SVE_1808200	Serine/threonine-protein kinase tousled-like 2
GO:0051173	positive regulation of nitrogen compound...	172	12	3.93	0.00057		GO:1901363	heterocyclic compound binding	5128	75	51.49	9.5e-06		GO.ID	25G	Annotated	Significant	Expected	Fis		GO.ID	26Gs	Annotated	Significant	Expected	Fis		SVE_1871100	Membrane-associated tyrosine-and threonine-specific cdc2-inhibitory kinase	SVE_1812100	Macoilin
GO:0032147	activation of protein kinase activity	8	3	0.18	0.0006		GO:0097159	organic cyclic compound binding	5130	75	51.51	9.6e-06		GO:0030261	chromosome condensation	19	1	0	0.0039		GO:0006278	RNA-dependent DNA biosynthetic process	261	2	0.11	0.0042		SVE_1872600	Hypothetical protein SRAE_2000142400	SVE_1955200	Serine/threonine-protein phosphatase PP1-beta
GO:0051225	spindle assembly	8	3	0.18	0.0006		GO:0003676	nucleic acid binding	3047	52	30.59	1.4e-05		GO:0006323	DNA packaging	28	1	0.01	0.0058		GO:0071897	DNA biosynthetic process	290	2	0.12	0.0051		SVE_1885500	RNA polymerase-associated protein LEO1
GO:0051347	positive regulation of transferase activ...	31	5	0.71	0.00062		GO:0005515	protein binding	2851	45	28.63	0.00053									GO:0030261	chromosome condensation	19	1	0.01	0.0078		SVE_1898000	Sox100B
GO:0006913	nucleocytoplasmic transport	65	7	1.48	0.00067		GO:0043138	3'-5' DNA helicase activity	4	2	0.04	0.00059									GO:0003964	RNA-directed DNA polymerase activity	261	2	0.11	0.0047		SVE_1914200	Hypothetical protein SRAE_1000050200
GO:0051169	nuclear transport	65	7	1.48	0.00067		GO:0036094	small molecule binding	2532	40	25.42	0.00126									GO:0034061	DNA polymerase activity	278	2	0.12	0.0053		SVE_0614600	---NA---
GO:0016569	covalent chromatin modification	108	9	2.47	0.00079		GO:0000166	nucleotide binding	2365	37	23.75	0.0025																SVE_1464100	---NA---
GO:0016570	histone modification	108	9	2.47	0.00079		GO:1901265	nucleoside phosphate binding	2365	37	23.75	0.0025																SVE_1252700	---NA---
GO:0048519	negative regulation of biological proces...	463	22	10.57	0.00089		GO:0008017	microtubule binding	68	4	0.68	0.0048		d) Shared GO terms - Gene														SVE_1463800	---NA---
GO:0031047	gene silencing by RNA	50	6	1.14	0.00091		GO:0003677	DNA binding	1113	20	11.18	0.00725		GO.ID	BP-GO	Annotated	Significant	Expected	Fis		GO.ID	TCC	Annotated	Significant	Expected	Fis		SVE_1517700	Reverse transcriptase domain-containing protein
GO:0015931	nucleobase-containing compound transport	89	8	2.03	0.00094		GO:0043168	anion binding	2385	35	23.95	0.00968		GO:0015074	DNA integration	636	12	2.94	2.2e-05		GO:1990423	RZZ complex	6	2	0.02	0.00022		SVE_1953500	Condensin-2 complex subunit D3
GO:0065007	biological regulation	3064	92	69.97	0.00102									GO:0006259	DNA metabolic process	1149	14	5.32	0.00046		GO:0000776	kinetochore	9	2	0.04	0.00053		SVE_0667600	ribonuclease HI
GO:0031325	positive regulation of cellular metaboli...	184	12	4.2	0.00103		GO.ID	26Gs_CC	Annotated	Significant	Expected	Fis		GO:0022402	cell cycle process	155	5	0.72	0.00071		GO:0000775	chromosome, centromeric region	12	2	0.05	0.00096		SVE_1152900	unnamed protein product
GO:0060548	negative regulation of cell death	21	4	0.48	0.00117		GO:0032991	protein-containing complex	1511	31	14.56	1.7e-05		GO:1903047	mitotic cell cycle process	107	4	0.5	0.00146		GO:0005769	early endosome	12	2	0.05	0.00096		SVE_0163700	---NA---
GO:0016458	gene silencing	53	6	1.21	0.00124		GO:1990234	transferase complex	187	9	1.8	7.5e-05		GO:0006661	phosphatidylinositol biosynthetic proces...	52	3	0.24	0.00175		GO:0005694	chromosome	216	5	0.85	0.00143		SVE_0164600	Protein regulator of cytokinesis 1
GO:1901987	regulation of cell cycle phase transitio...	22	4	0.5	0.0014		GO:1902494	catalytic complex	426	13	4.1	0.00021		GO:0000278	mitotic cell cycle	121	4	0.56	0.0023		GO:0030014	CCR4-NOT complex	15	2	0.06	0.00152		SVE_0237300	Hypothetical protein SRAE_2000515500
GO:1902850	microtubule cytoskeleton organization in...	22	4	0.5	0.0014		GO:0000123	histone acetyltransferase complex	32	4	0.31	0.00024		GO:0051726	regulation of cell cycle	126	4	0.58	0.00266		GO:0098687	chromosomal region	16	2	0.06	0.00173		SVE_0391300	Reverse transcriptase domain and Integrase, catalytic core domain and Zinc finger, CCHC-type domain and Ribonuclease H-like domain and Aspartic peptidase domain-containing protein
GO:0007093	mitotic cell cycle checkpoint	37	5	0.84	0.00143		GO:0005622	intracellular	3676	52	35.41	0.00031		GO:0007049	cell cycle	213	5	0.99	0.00289		GO:1990234	transferase complex	187	4	0.73	0.0059		SVE_0448400	---NA---
GO:0010562	positive regulation of phosphorus metabo...	37	5	0.84	0.00143		GO:0030014	CCR4-NOT complex	15	3	0.14	0.00036		GO:0030261	chromosome condensation	19	2	0.09	0.00341		GO:0005797	Golgi medial cisterna	2	1	0.01	0.00782		SVE_0666400	uncharacterized protein LOC115880611
GO:0045937	positive regulation of phosphate metabol...	37	5	0.84	0.00143		GO:0031248	protein acetyltransferase complex	36	4	0.35	0.00038		GO:0046474	glycerophospholipid biosynthetic process	73	3	0.34	0.0046		GO:0005942	phosphatidylinositol 3-kinase complex	2	1	0.01	0.00782		SVE_0679700	WD40 repeat and WD40/YVTN repeat-like-containing domain and WD40-repeat-containing domain-containing protein
GO:0022414	reproductive process	246	14	5.62	0.00152		GO:1902493	acetyltransferase complex	36	4	0.35	0.00038		GO:0001702	gastrulation with mouth forming second	1	1	0	0.00463		GO:0031045	dense core granule	2	1	0.01	0.00782		SVE_0681100	Aminotransferase, class I/classII domain and Pyridoxal phosphate-dependent transferase, major region, subdomain 1 and Pyridoxal phosphate-dependent transferase, major region, subdomain 2 and Pyridoxal phosphate-dependent transferase domain-containing protein
GO:0002143	tRNA wobble position uridine thiolation	3	2	0.07	0.00153		GO:0070013	intracellular organelle lumen	425	12	4.09	0.00074		GO:0001881	receptor recycling	1	1	0	0.00463		GO:0035032	phosphatidylinositol 3-kinase complex, c...	2	1	0.01	0.00782		SVE_0794500	DNA replication ATP-dependent helicase/nuclease DNA2
GO:0051656	establishment of organelle localization	56	6	1.28	0.00166		GO:0043233	organelle lumen	426	12	4.1	0.00075		GO:0045017	glycerolipid biosynthetic process	76	3	0.35	0.00515		GO:0070772	PAS complex	2	1	0.01	0.00782		SVE_1076100	Astacin-like metalloendopeptidase
GO:1902749	regulation of cell cycle G2/M phase tran...	11	3	0.25	0.00169		GO:0031974	membrane-enclosed lumen	428	12	4.12	0.00078		GO:0090304	nucleic acid metabolic process	2563	20	11.86	0.00656									SVE_1084000	Reverse transcriptase domain and Integrase,catalytic core domain and Ribonuclease H-like domain and AT hook-like family and Aspartic peptidase domain-containing protein
GO:0010604	positive regulation of macromolecule met...	196	12	4.48	0.00177		GO:1990423	RZZ complex	6	2	0.06	0.00134		GO:0006278	RNA-dependent DNA biosynthetic process	261	5	1.21	0.00683		GO.ID	Term_MF	Annotated	Significant	Expected	Fis		SVE_1158000	Protein argonaute-2
GO:0045930	negative regulation of mitotic cell cycl...	39	5	0.89	0.00182		GO:0031981	nuclear lumen	335	10	3.23	0.00138		GO:0006323	DNA packaging	28	2	0.13	0.00734		GO:0005488	binding	8241	58	41.37	2e-08		SVE_1228500	Reverse transcriptase domain and Integrase,catalytic core domain and Ribonuclease H-like domain and AT hook-like family and Aspartic peptidase domain-containing protein
GO:0007276	gamete generation	78	7	1.78	0.00197		GO:0005634	nucleus	1609	27	15.5	0.00193		GO:0046488	phosphatidylinositol metabolic process	90	3	0.42	0.00823		GO:1901363	heterocyclic compound binding	5128	44	25.74	1.3e-06		SVE_1333300	---NA---
GO:0000075	cell cycle checkpoint	40	5	0.91	0.00204		GO:0043229	intracellular organelle	3106	43	29.92	0.00293		GO:0008654	phospholipid biosynthetic process	96	3	0.44	0.00981		GO:0097159	organic cyclic compound binding	5130	44	25.75	1.3e-06		SVE_1481100	Spectrin beta chain, erythrocytic
GO:0043066	negative regulation of apoptotic process	12	3	0.27	0.00222		GO:0000776	kinetochore	9	2	0.09	0.00316									GO:0003676	nucleic acid binding	3047	29	15.3	0.00011		SVE_1500100	Reverse transcriptase domain and Integrase,catalytic core domain and Ribonuclease H-like domain and AT hook-like family and Aspartic peptidase domain-containing protein
GO:0044839	cell cycle G2/M phase transition	12	3	0.27	0.00222		GO:0005694	chromosome	216	7	2.08	0.00473									GO:0003964	RNA-directed DNA polymerase activity	261	5	1.31	0.00981		SVE_1535500	Reverse transcriptase domain and Integrase, catalytic core domain and Zinc finger, CCHC-type domain and Ribonuclease H-like domain and Aspartic peptidase domain-containing protein
GO:0019953	sexual reproduction	103	8	2.35	0.00241		GO:0035267	NuA4 histone acetyltransferase complex	11	2	0.11	0.00477																SVE_1651800	Hypothetical protein SRAE_1000268700
GO:0032446	protein modification by small protein co...	128	9	2.92	0.00261		GO:0043189	H4/H2A histone acetyltransferase complex	11	2	0.11	0.00477																SVE_1695300	Barrier-to-autointegration factor
GO:0044770	cell cycle phase transition	26	4	0.59	0.00267		GO:0043226	organelle	3207	43	30.9	0.00568																SVE_1704500	Zinc finger, CCHC-type domain-containing protein
GO:0007281	germ cell development	62	6	1.42	0.00281		GO:0000775	chromosome, centromeric region	12	2	0.12	0.00569																SVE_1706300	Reverse transcriptase domain and Integrase,catalytic core domain and Ribonuclease H-like domain and AT hook-like family and Aspartic peptidase domain-containing protein
GO:0051640	organelle localization	83	7	1.9	0.00281		GO:0005769	early endosome	12	2	0.12	0.00569																SVE_1847000	RNA-recognition motif (RRM) Nup35-type domain-containing protein
GO:0043069	negative regulation of programmed cell d...	13	3	0.3	0.00284		GO:1902562	H4 histone acetyltransferase complex	13	2	0.13	0.00668																SVE_0002500	Hypothetical protein SRAE_1000100400
GO:0097479	synaptic vesicle localization	13	3	0.3	0.00284																							SVE_0042000	Lateral signaling target protein 2 homolog
GO:1901990	regulation of mitotic cell cycle phase t...	13	3	0.3	0.00284																							SVE_0070300	CXXC-type zinc finger protein 1
GO:0009893	positive regulation of metabolic process	208	12	4.75	0.00291																							SVE_0073100	Hypothetical protein SRAE_2000080400
GO:0031323	regulation of cellular metabolic process	1092	39	24.94	0.00293																							SVE_0079000	Hypothetical protein SRAE_1000053900
GO:0000003	reproduction	265	14	6.05	0.00302																							SVE_0079200	Maternal protein pumilio
GO:0007032	endosome organization	4	2	0.09	0.00302																							SVE_0086000	Protein NRDE2 homolog
GO:0010389	regulation of G2/M transition of mitotic...	4	2	0.09	0.00302																							SVE_0178400	Hypothetical protein SRAE_2000080700
GO:0015937	coenzyme A biosynthetic process	4	2	0.09	0.00302																							SVE_0198100	DNA mismatch repair protein MutS, C-terminal domain and DNA mismatch repair protein MutS, core domain and DNA mismatch repair protein MutS, clamp domain and P-loop containing nucleoside triphosphate hydrolase domain-containing protein
GO:0090307	mitotic spindle assembly	4	2	0.09	0.00302																							SVE_0203300	RNA polymerase-associated protein Ctr9 homolog
GO:0044703	multi-organism reproductive process	108	8	2.47	0.00324																							SVE_0220300	Hypothetical protein SRAE_1000297400
GO:0051704	multi-organism process	108	8	2.47	0.00324																							SVE_0279400	Hypothetical protein SRAE_2000080300
GO:0010468	regulation of gene expression	956	35	21.83	0.00328																							SVE_0287100	Zinc finger, MIZ-type domain-containing protein
GO:0043410	positive regulation of MAPK cascade	14	3	0.32	0.00355																							SVE_0311500	Eb1
GO:0044772	mitotic cell cycle phase transition	14	3	0.32	0.00355																							SVE_0321500	Polynucleotide 5'-hydroxyl-kinase NOL9
GO:0051171	regulation of nitrogen compound metaboli...	1071	38	24.46	0.00372																							SVE_0325700	Homeobox domain and Homeodomain-like-containing protein
GO:0016197	endosomal transport	46	5	1.05	0.0038																							SVE_0327200	Hypothetical protein SRAE_1000041600
GO:0010605	negative regulation of macromolecule met...	272	14	6.21	0.00381																							SVE_0341500	Maternal protein pumilio
GO:0022412	cellular process involved in reproductio...	66	6	1.51	0.00385																							SVE_0383800	Kinesin-like protein KIF2A
GO:0051648	vesicle localization	29	4	0.66	0.00402																							SVE_0434500	RuvB-like 1
GO:0080090	regulation of primary metabolic process	1079	38	24.64	0.00422																							SVE_0444400	Zinc finger, nuclear hormone receptor-type domain and Nuclear hormone receptor, ligand-binding domain and Zinc finger, NHR/GATA-type domain-containing protein
GO:0051649	establishment of localization in cell	428	19	9.77	0.00424																							SVE_0455500	RZZ complex, subunit zwilch family-containing protein
GO:0031399	regulation of protein modification proce...	113	8	2.58	0.00428																							SVE_0486400	RZZ complex, subunit zwilch family-containing protein
GO:0051338	regulation of transferase activity	68	6	1.55	0.00446																							SVE_0561300	Rho GTPase-activating protein domain and Rho GTPase activation protein domain-containing protein
GO:0001934	positive regulation of protein phosphory...	30	4	0.69	0.00455																							SVE_0566500	Low-density lipoprotein (LDL) receptor class A repeat-containing protein
GO:0006417	regulation of translation	48	5	1.1	0.00457																							SVE_0601500	Nuclear RNA export factor 2
GO:0034248	regulation of cellular amide metabolic p...	48	5	1.1	0.00457																							SVE_0679400	Hypothetical protein SRAE_2000276500
GO:0046907	intracellular transport	371	17	8.47	0.00491																							SVE_0682100	---NA---
GO:0000086	G2/M transition of mitotic cell cycle	5	2	0.11	0.00496																							SVE_0682500	Hypothetical protein SRAE_1000081500
GO:0009892	negative regulation of metabolic process	281	14	6.42	0.00508																							SVE_0693500	Rhodanese-like domain-containing protein
GO:0006464	cellular protein modification process	1654	53	37.77	0.00517																							SVE_0940400	Rac GTPase-activating protein 1
GO:0036211	protein modification process	1654	53	37.77	0.00517																							SVE_0977500	Zinc finger, RING-type domain and Zinc finger, RING/FYVE/PHD-type domain-containing protein
GO:0044260	cellular macromolecule metabolic process	4280	117	97.74	0.00529																							SVE_1007800	RING finger protein 212B isoform X2
GO:0042327	positive regulation of phosphorylation	32	4	0.73	0.00576																							SVE_1041500	SET domain-containing protein
GO:0051321	meiotic cell cycle	32	4	0.73	0.00576																							SVE_1089700	RNA polymerase-associated protein Ctr9 homolog
GO:0060627	regulation of vesicle-mediated transport	33	4	0.75	0.00644																							SVE_1150900	Hypothetical protein SRAE_2000288300
GO:0007018	microtubule-based movement	74	6	1.69	0.00675																							SVE_1223900	Mutagen-sensitive 301
GO:0045786	negative regulation of cell cycle	53	5	1.21	0.00699																							SVE_1341500	Las1-like family-containing protein
GO:0007098	centrosome cycle	6	2	0.14	0.00733																							SVE_1608600	Galactose oxidase/kelch, beta-propeller domain and Kelch-type beta propeller domain-containing protein
GO:0015936	coenzyme A metabolic process	6	2	0.14	0.00733																							SVE_1635100	Hypothetical protein SRAE_2000487800
GO:0031023	microtubule organizing center organizati...	6	2	0.14	0.00733																							SVE_1638900	Maternal protein pumilio
GO:0070192	chromosome organization involved in meio...	6	2	0.14	0.00733																							SVE_1796200	Hypothetical protein SRAE_2000155100
GO:0009067	aspartate family amino acid biosynthetic...	18	3	0.41	0.00744																							SVE_1814300	MOB kinase activator-like 4
GO:0140013	meiotic nuclear division	18	3	0.41	0.00744																							SVE_1838200	Probable DNA mismatch repair protein Msh6
GO:0016192	vesicle-mediated transport	327	15	7.47	0.00798																							SVE_1854000	Hypothetical protein SRAE_2000043500
GO:0043412	macromolecule modification	1768	55	40.38	0.00803																							SVE_1878900	Nucleoporin Nup85-like family-containing protein
GO:0034645	cellular macromolecule biosynthetic proc...	2008	61	45.86	0.00847																							SVE_1886700	Hypothetical protein SRAE_2000062800
GO:0006928	movement of cell or subcellular componen...	181	10	4.13	0.00854																							SVE_1913000	Hypothetical protein SRAE_1000092400
GO:0009790	embryo development	181	10	4.13	0.00854																							SVE_1914400	Hypothetical protein SRAE_1000293900
GO:0006354	DNA-templated transcription, elongation	19	3	0.43	0.00869																							SVE_1915600	Neurogenic locus notch homolog protein 1
GO:0030261	chromosome condensation	19	3	0.43	0.00869																							SVE_1934600	E3 ubiquitin-protein ligase SH3RF2 isoform X2
GO:0045860	positive regulation of protein kinase ac...	19	3	0.43	0.00869																							SVE_1991400	---NA---
GO:0009059	macromolecule biosynthetic process	2021	61	46.15	0.00973																							SVE_0000300	LDLR class B repeat and Epidermal growth factor-like domain and EGF-like calcium-binding domain and Low-density lipoprotein (LDL) receptor class A repeat and Six-bladed beta-propeller, TolB-like domain-containing protein
																												SVE_0000383350	Ribosomal protein S6 kinase II
GO.ID	25Gs_MF	Annotated	Significant	Expected	Fis																							SVE_0005800	Protein argonaute-2
GO:0005515	protein binding	2851	116	65.99	1.2e-11																							SVE_0014700	Thymidine kinase, cytosolic
GO:0005488	binding	8241	233	190.74	1.2e-09																							SVE_0020000	Symplekin
GO:0008017	microtubule binding	68	13	1.57	4.1e-09																							SVE_0031500	Peptidase C48, SUMO/Sentrin/Ubl1 family-containing protein
GO:0015631	tubulin binding	86	13	1.99	7.9e-08																							SVE_0047100	glycogen synthase
GO:0097367	carbohydrate derivative binding	2198	86	50.87	1.6e-07																							SVE_0054300	Hypothetical protein SRAE_X000073300
GO:0035639	purine ribonucleoside triphosphate bindi...	2109	83	48.81	2.3e-07																							SVE_0066800	Rac GTPase-activating protein 1
GO:0008144	drug binding	1979	79	45.8	2.9e-07																							SVE_0075100	Bromodomain containing protein
GO:0005524	ATP binding	1808	74	41.85	3e-07																							SVE_0082500	Probable ATP-dependent RNA helicase DDX47
GO:0032555	purine ribonucleotide binding	2132	83	49.35	3.8e-07																							SVE_0091400	ATP-dependent DNA helicase Q5
GO:0017076	purine nucleotide binding	2136	83	49.44	4.1e-07																							SVE_0140000	Ras-related protein Rab-7a
GO:0032553	ribonucleotide binding	2143	83	49.6	4.7e-07																							SVE_0148700	protein bicaudal C homolog 1-B-like
GO:0032559	adenyl ribonucleotide binding	1831	74	42.38	5e-07																							SVE_0151900	Peptidase S59, nucleoporin domain and Gamma-secretase subunit Aph-1 family and Nuclear protein 96 domain and Nucleoporin FG repeat-containing protein
GO:0030554	adenyl nucleotide binding	1835	74	42.47	5.5e-07																							SVE_0155900	Probable ATP-dependent RNA helicase DDX6
GO:0043168	anion binding	2385	89	55.2	7.8e-07																							SVE_0156100	Transthyretin-like family-containing protein
GO:0000166	nucleotide binding	2365	88	54.74	1.1e-06																							SVE_0157900	Hypothetical protein SRAE_1000293200
GO:1901265	nucleoside phosphate binding	2365	88	54.74	1.1e-06																							SVE_0161500	Zinc finger, RING-type domain and Zinc finger, RING/FYVE/PHD-type domain-containing protein
GO:0036094	small molecule binding	2532	91	58.6	3e-06																							SVE_0167500	Cell division cycle protein 20 homolog
GO:1901363	heterocyclic compound binding	5128	150	118.69	7.4e-05																							SVE_0184600	Armadillo segment polarity protein
GO:0097159	organic cyclic compound binding	5130	150	118.73	7.6e-05																							SVE_0194800	WD40-repeat-containing domain-containing protein
GO:0008092	cytoskeletal protein binding	260	17	6.02	0.00012																							SVE_0201100	Adenylyltransferase and sulfurtransferase MOCS3
GO:0017111	nucleoside-triphosphatase activity	853	36	19.74	0.00032																							SVE_0208500	Myosin head, motor domain and Myosin tail domain and Myosin, N-terminal, SH3-like domain and Myosin-like IQ motif-containing domain and P-loop containing nucleoside triphosphate hydrolase domain-containing protein
GO:0016887	ATPase activity	520	25	12.04	0.00044																							SVE_0214100	F-box domain and K Homology domain and K Homology domain, type 1-containing protein
GO:0016462	pyrophosphatase activity	875	36	20.25	0.00051																							SVE_0214400	Hypothetical protein SRAE_0000011700
GO:0097110	scaffold protein binding	2	2	0.05	0.00053																							SVE_0230600	Retinal dehydrogenase 2
GO:0016818	hydrolase activity, acting on acid anhyd...	879	36	20.34	0.00056																							SVE_0255200	Protein Wnt-4
GO:0016817	hydrolase activity, acting on acid anhyd...	885	36	20.48	0.00063																							SVE_0256400	Fizzy/cell division cycle 20 related 1
GO:0017056	structural constituent of nuclear pore	18	4	0.42	0.00066																							SVE_0281400	Transcription initiation factor TFIID domain and Histone-fold domain-containing protein
GO:0010997	anaphase-promoting complex binding	9	3	0.21	0.00093																							SVE_0281900	Chromosome 1 open reading frame 9
GO:0004386	helicase activity	329	17	7.61	0.0017																							SVE_0312500	Restin homolog
GO:0004140	dephospho-CoA kinase activity	4	2	0.09	0.00311																							SVE_0312600	SANT associated domain-containing protein
GO:0003676	nucleic acid binding	3047	90	70.52	0.00466																							SVE_0313600	vacuolar protein sorting-associated protein 4B
GO:0003777	microtubule motor activity	49	5	1.13	0.00532																							SVE_0322100	Mitotic checkpoint protein BUB3
																												SVE_0322700	Inversin
GO.ID	25Gs_CC	Annotated	Significant	Expected	Fis																							SVE_0326700	ATP-dependent RNA helicase DHX8
GO:0005622	intracellular	3676	116	81.33	6.8e-07																							SVE_0329900	---NA---
GO:0005694	chromosome	216	18	4.78	1.3e-06																							SVE_0331600	RuvB-like 1
GO:0043229	intracellular organelle	3106	100	68.72	4e-06																							SVE_0336400	Fanconi anemia group J protein
GO:0005634	nucleus	1609	61	35.6	7.5e-06																							SVE_0349000	BTB/POZ-like domain and BTB/POZ fold domain and BTB/POZ domain-containing protein
GO:0000228	nuclear chromosome	67	9	1.48	1.5e-05																							SVE_0364800	T-complex protein 1 subunit gamma
GO:0031981	nuclear lumen	335	21	7.41	1.6e-05																							SVE_0365700	Nucleoporin p54
GO:0043226	organelle	3207	100	70.96	1.9e-05																							SVE_0387000	Sphingomyelin synthase-like domain-containing protein
GO:0000776	kinetochore	9	4	0.2	2.7e-05																							SVE_0388400	Pumilio RNA-binding repeat and Armadillo-like helical domain and Armadillo-type fold domain-containing protein
GO:0043228	non-membrane-bounded organelle	947	40	20.95	4.1e-05																							SVE_0397100	TP53-regulating kinase
GO:0043232	intracellular non-membrane-bounded organ...	947	40	20.95	4.1e-05																							SVE_0397400	putative pre-mRNA-splicing factor ATP-dependent RNA helicase PRP1
GO:0005654	nucleoplasm	194	14	4.29	9.9e-05																							SVE_0403000	SANT associated domain-containing protein
GO:0000775	chromosome, centromeric region	12	4	0.27	0.0001																							SVE_0403900	Armadillo-like helical domain and Armadillo-type fold domain and HEAT, type 2 repeat and CLASP N-terminal domain-containing protein
GO:1902494	catalytic complex	426	22	9.43	0.00018																							SVE_0404000	Armadillo-like helical domain and Armadillo-type fold domain and HEAT, type 2 repeat and CLASP N-terminal domain-containing protein
GO:1990423	RZZ complex	6	3	0.13	0.0002																							SVE_0409400	Hypothetical protein SRAE_2000163600
GO:0005635	nuclear envelope	40	6	0.89	0.00022																							SVE_0418500	Transcription termination factor 2
GO:0005643	nuclear pore	27	5	0.6	0.00027																							SVE_0421000	Innexin family-containing protein
GO:0098687	chromosomal region	16	4	0.35	0.00034																							SVE_0424800	Origin recognition complex subunit 1
GO:0090730	Las1 complex	7	3	0.15	0.00035																							SVE_0434200	Spectrin beta chain, erythrocytic
GO:0000790	nuclear chromatin	45	6	1	0.00043																							SVE_0437300	Hypothetical protein SRAE_1000061800
GO:0043231	intracellular membrane-bounded organelle	2443	76	54.05	0.00045																							SVE_0442200	Platelet-activating factor acetylhydrolase IB subunit alpha
GO:0070013	intracellular organelle lumen	425	21	9.4	0.00046																							SVE_0455700	Protein argonaute-2
GO:0043233	organelle lumen	426	21	9.43	0.00048																							SVE_0463300	Hypothetical protein SRAE_2000264900
GO:1990124	messenger ribonucleoprotein complex	2	2	0.04	0.00049																							SVE_0473000	SWI/SNF-related matrix-associated actin-dependent regulator of chromatin subfamily B member 1
GO:0031974	membrane-enclosed lumen	428	21	9.47	0.00051																							SVE_0476600	Alanine--tRNA ligase, cytoplasmic
GO:0032991	protein-containing complex	1511	52	33.43	0.00054																							SVE_0482400	Hypothetical protein SRAE_2000250400
GO:0043227	membrane-bounded organelle	2594	79	57.39	0.00065																							SVE_0491500	Proteasome maturation factor UMP1 family-containing protein
GO:0070603	SWI/SNF superfamily-type complex	36	5	0.8	0.00109																							SVE_0499600	ER membrane protein complex subunit 2
GO:1904949	ATPase complex	36	5	0.8	0.00109																							SVE_0500000	Pre-mRNA-splicing factor CWC22 homolog
GO:0043073	germ cell nucleus	3	2	0.07	0.00144																							SVE_0504500	Vacuolar protein sorting-associated protein 53 homolog
GO:0035267	NuA4 histone acetyltransferase complex	11	3	0.24	0.00155																							SVE_0506100	Nucleolar complex protein 4 homolog
GO:0043189	H4/H2A histone acetyltransferase complex	11	3	0.24	0.00155																							SVE_0516900	Nuclear GTP binding protein
GO:1902555	endoribonuclease complex	13	3	0.29	0.00259																							SVE_0524300	Protein argonaute-2
GO:1902562	H4 histone acetyltransferase complex	13	3	0.29	0.00259																							SVE_0544400	Hypothetical protein SRAE_2000210100
GO:1905348	endonuclease complex	13	3	0.29	0.00259																							SVE_0550800	Hypothetical protein SRAE_1000089500
GO:0097255	R2TP complex	4	2	0.09	0.00284																							SVE_0589600	Hypothetical protein SRAE_0000022600
GO:1990234	transferase complex	187	11	4.14	0.00291																							SVE_0590700	Citrate lyase subunit beta-like protein, mitochondrial
GO:0005819	spindle	29	4	0.64	0.00358																							SVE_0595000	Sarcolemmal membrane-associated protein
GO:1905354	exoribonuclease complex	15	3	0.33	0.00399																							SVE_0602700	DEP domain and Winged helix-turn-helix DNA-binding domain-containing protein
GO:0000123	histone acetyltransferase complex	32	4	0.71	0.00515																							SVE_0605000	Cell division GTP binding protein domain containing protein
GO:0000785	chromatin	100	7	2.21	0.00662																							SVE_0605600	Structural maintenance of chromosomes protein
GO:0000118	histone deacetylase complex	6	2	0.13	0.00689																							SVE_0606900	ankyrin repeat domain protein 28, putative
GO:0016581	NuRD complex	6	2	0.13	0.00689																							SVE_0637200	Hypothetical protein SRAE_1000222800
GO:0051233	spindle midzone	6	2	0.13	0.00689																							SVE_0637400	UV radiation resistance protein/autophagy-related protein 14 family-containing protein
GO:0090545	CHD-type complex	6	2	0.13	0.00689																							SVE_0640400	Translation initiation factor IF-2, mitochondrial
GO:0031248	protein acetyltransferase complex	36	4	0.8	0.00788																							SVE_0643700	Speckle-type POZ protein
GO:1902493	acetyltransferase complex	36	4	0.8	0.00788																							SVE_0649000	Ubiquitin-related modifier 1
																												SVE_0664500	Immunoglobulin V-set, subgroup domain and Immunoglobulin subtype 2 domain and Immunoglobulin subtype domain and Fibronectin, type III domain and Immunoglobulin-like domain and Immunoglobulin I-set domain and Immunoglobulin-like fold domain-containing protein
																												SVE_0670000	Protein vav
																												SVE_0673600	Zinc finger, RING-type domain and Zinc finger, RING/FYVE/PHD-type domain-containing protein
																												SVE_0682400	Hypothetical protein SRAE_1000311200
																												SVE_0683300	ankyrin repeat domain protein 28, putative
																												SVE_0691100	Restin homolog
																												SVE_0701000	nucleoporin protein Ndc1-Nup
																												SVE_0716600	P-loop containing nucleoside triphosphate hydrolase domain-containing protein
																												SVE_0718100	Aminoacyl-tRNA synthetase, class Ia domain and Isoleucine-tRNA ligase family and Valyl/Leucyl/Isoleucyl-tRNA synthetase, editing domain and Aminoacyl-tRNA synthetase, class 1a, anticodon-binding domain and Valyl/Leucyl/Isoleucyl-tRNA synthetase, anticodon-binding domain and Rossmann-like alpha/beta/alpha sandwich fold domain-containing protein
																												SVE_0719300	Spindle assembly checkpoint component Mad1
																												SVE_0778400	C-type lectin domain and C-type lectin-like domain and C-type lectin fold domain-containing protein
																												SVE_0787400	Tudor domain-containing protein
																												SVE_0809300	Ribosome-releasing factor 2, mitochondrial
																												SVE_0835800	Armadillo-like helical domain and Armadillo-type fold domain and CLASP N-terminal domain-containing protein
																												SVE_0837500	Programmed cell death 6-interacting protein
																												SVE_0858400	JNK-interacting protein 3
																												SVE_0859200	Hypothetical protein SRAE_2000080700
																												SVE_0869400	EH domain-binding protein 1
																												SVE_0872100	TRAPP II complex, Trs120 family-containing protein
																												SVE_0872200	Hypothetical protein SRAE_1000001100
																												SVE_0872900	Hypothetical protein SRAE_1000014100
																												SVE_0873600	Hypothetical protein SRAE_X000110400
																												SVE_0912800	Mitochondrial fission regulator 1 family-containing protein
																												SVE_0933800	Peptidase M41 and ATPase domain containing protein
																												SVE_0940000	NAD-dependent epimerase/dehydratase domain and NAD(P)-binding domain-containing protein
																												SVE_0941200	Transmembrane receptor, eukaryota family-containing protein
																												SVE_0941800	Hypothetical protein SRAE_1000183000
																												SVE_0944300	EEIG1/EHBP1 N-terminal domain-containing protein
																												SVE_0948500	ABC transporter-like domain and AAA+ ATPase domain and P-loop containing nucleoside triphosphate hydrolase domain-containing protein
																												SVE_0949300	Zinc finger, RING-CH-type domain and Zinc finger, RING/FYVE/PHD-type domain-containing protein
																												SVE_0960200	FMRFamide receptor
																												SVE_0960700	GPI mannosyltransferase 1
																												SVE_0962000	Topoisomerase II-associated protein PAT1 family-containing protein
																												SVE_0968000	Chromo domain-like and RNA binding activity-knot of a chromodomain-containing protein
																												SVE_0969100	Hypothetical protein SRAE_1000139700
																												SVE_0974400	Protein SDA1 homolog
																												SVE_0982200	Ets domain and Winged helix-turn-helix DNA-binding domain-containing protein
																												SVE_0986000	histone deacetylase 1
																												SVE_0987600	Lethal (1) G0222
																												SVE_0987700	Kinesin-like protein KIF21B
																												SVE_0999800	Homeobox protein homothorax
																												SVE_1004500	Zinc finger, nanos-type domain-containing protein
																												SVE_1007000	Peptidase C48, SUMO/Sentrin/Ubl1 family-containing protein
																												SVE_1015000	Zinc finger, RING-type domain and Protease-associated domain, PA and Zinc finger, RING/FYVE/PHD-type domain-containing protein
																												SVE_1027100	WD domain, G-beta repeat protein
																												SVE_1028700	Ubiquitin carboxyl-terminal hydrolase 42
																												SVE_1031300	Protein CBR-CAPG-2
																												SVE_1033900	Hypothetical protein SRAE_1000089500
																												SVE_1036500	CS domain and HSP20-like chaperone domain-containing protein
																												SVE_1050700	Hypothetical protein SRAE_1000250300
																												SVE_1056500	Hypothetical protein SRAE_1000040500
																												SVE_1078100	Hypothetical predicted protein
																												SVE_1085800	THUMP domain-containing protein
																												SVE_1091300	Hypothetical protein SRAE_1000081500
																												SVE_1091400	Hypothetical protein SRAE_1000057400
																												SVE_1102900	Cyclin-dependent kinase 1
																												SVE_1151100	Protein-tyrosine phosphatase,receptor/non-receptor type domain and Protein-tyrosine/Dual specificity phosphatase domain and Protein-tyrosine phosphatase, catalytic domain-containing protein
																												SVE_1156300	unnamed protein product
																												SVE_1183600	Zinc finger, BED-type predicted domain-containing protein
																												SVE_1209400	CPL domain protein
																												SVE_1216500	recQ-mediated genome instability protein 1
																												SVE_1243500	Sodium/sulphate symporter family-containing protein
																												SVE_1342700	---NA---
																												SVE_1362700	Hypothetical protein SRAE_2000232200
																												SVE_1567400	---NA---
																												SVE_1580500	dnaJ homolog subfamily A member 1-like
																												SVE_1585600	Nucleotidyl transferase domain and Poly(A) polymerase, RNA-binding domain and Poly(A) polymerase, central domain and Nucleotidyltransferase, class I, C-terminal-like domain and Poly(A) polymerase family-containing protein
																												SVE_1585800	DNA replication licensing factor MCM4
																												SVE_1586600	Protein kinase domain and Serine/threonine-/dual specificity protein kinase, catalytic domain and Protein kinase-like domain-containing protein
																												SVE_1594100	Nuclear pore complex protein Nup93
																												SVE_1598900	Epidermal growth factor-like domain-containing protein
																												SVE_1600700	AP-1 complex subunit mu-1-I
																												SVE_1608100	Zinc finger, C2H2 domain-containing protein
																												SVE_1609900	Bax inhibitor 1
																												SVE_1610100	COG5 protein
																												SVE_1613500	Pre-mRNA-processing-splicing factor 8
																												SVE_1633100	Zinc finger, nanos-type domain-containing protein
																												SVE_1642400	MATH domain and TRAF-like domain-containing protein
																												SVE_1646700	Hypothetical protein SRAE_2000381400
																												SVE_1651000	Kinesin-like protein KIF15
																												SVE_1673300	E3 ubiquitin-protein ligase CBL-B
																												SVE_1681000	Dizzy
																												SVE_1688800	Cyclin-dependent kinase 19
																												SVE_1700400	Hypothetical protein SRAE_1000043500
																												SVE_1712600	Hormone-sensitive lipase
																												SVE_1726900	Pleckstrin homology-like domain-containing protein
																												SVE_1729900	Low-density lipoprotein (LDL) receptor class A repeat and DNA methyltransferase 1-associated 1 domain-containing protein
																												SVE_1742500	Nuclear pore complex protein Nup155
																												SVE_1745900	Bifunctional lysine-specific demethylase and histidyl-hydroxylase NO66
																												SVE_1755000	Mediator of RNA polymerase II transcription subunit 17
																												SVE_1762300	Dedicator of cytokinesis C-terminal domain and Golgi pH regulator, conserved domain and Abscisic acid G-protein coupled receptor-like domain-containing protein
																												SVE_1767600	Protein argonaute-2
																												SVE_1789800	Inner centromere protein, ARK-binding domain-containing protein
																												SVE_1802400	28S ribosomal protein S7, mitochondrial
																												SVE_1802800	structural maintenance of chromosomes protein 3
																												SVE_1806700	CDC48, N-terminal subdomain and AAA+ ATPase domain and ATPase, AAA-type, core domain and CDC48, domain 2 and Aspartate decarboxylase-like domain and P-loop containing nucleoside triphosphate hydrolase domain-containing protein
																												SVE_1806900	ATP-dependent Clp protease ATP-binding subunit clpX-like, mitochondrial
																												SVE_1807300	Methyl-CpG binding protein 2/3, C-terminal domain-containing protein
																												SVE_1812100	Macoilin
																												SVE_1816300	GPI transamidase component PIG-T
																												SVE_1819100	Zinc finger, C2CH-type domain-containing protein
																												SVE_1822400	Serine/threonine-protein kinase polo
																												SVE_1824400	Zinc finger, CCCH-type domain-containing protein
																												SVE_1836700	Hpc2-related domain-containing protein
																												SVE_1837500	Chromatin assembly factor 1 subunit B
																												SVE_1839400	Bystin
																												SVE_1856400	G1/S-specific cyclin-E
																												SVE_1862200	Immunoglobulin-binding protein 1
																												SVE_1862800	Rac GTPase-activating protein 1
																												SVE_1866100	Tyrosine-protein phosphatase non-receptor type 23
																												SVE_1866200	Hypothetical protein SRAE_2000001700
																												SVE_1868000	Mitochondrial import inner membrane translocase subunit TIM44
																												SVE_1869000	Calcium-transporting ATPase sarcoplasmic/endoplasmic reticulum type
																												SVE_1870700	Dual specificity mitogen-activated protein kinase kinase dSOR1
																												SVE_1872500	Hypothetical protein SRAE_2000047400
																												SVE_1878200	Gas41
																												SVE_1883200	Serine/threonine-protein kinase polo
																												SVE_1883700	serine/threonine-protein kinase PLK1 isoform X2
																												SVE_1884300	Dolichyl-diphosphooligosaccharide--protein glycosyltransferase 48 kDa subunit
																												SVE_1889000	Bloom syndrome protein
																												SVE_1890900	Frizzled-4
																												SVE_1896000	Condensin-2 complex subunit H2
																												SVE_1896100	Spindle and kinetochore-associated protein 1
																												SVE_1898700	RNA recognition motif domain and CID domain and RNA polymerase II-binding domain and ENTH/VHS domain and Nucleotide-binding, alpha-beta plait domain-containing protein
																												SVE_1900700	Transmembrane protein 209
																												SVE_1901000	Anaphase-promoting complex subunit 2
																												SVE_1906300	Ubiquitin-conjugating enzyme, E2 domain and Ubiquitin-conjugating enzyme/RWD-like domain-containing protein
																												SVE_1910100	Hypothetical protein SRAE_2000075500
																												SVE_1913200	RNA polymerase-associated protein Ctr9 homolog
																												SVE_1915400	Conserved oligomeric Golgi complex subunit 6
																												SVE_1916100	Serine/threonine-protein kinase STK11
																												SVE_1933300	DNA topoisomerase 2-binding protein 1
																												SVE_1934200	Hypothetical protein SRAE_1000330300
																												SVE_1935700	Protein RER1
																												SVE_1937500	SUMO-activating enzyme subunit 2
																												SVE_1937900	unnamed protein product
																												SVE_1939500	PRP19/PSO4 homolog
																												SVE_1940300	RUN domain-containing protein
																												SVE_1940800	Hypothetical protein SRAE_1000271400
																												SVE_1944400	Tonsoku-like protein
																												SVE_1947700	Domain of unknown function SprT-like domain-containing protein
																												SVE_1947800	Hypothetical protein SRAE_2000312300
																												SVE_1954500	Protein argonaute-2
																												SVE_1969500	LD31742p
