# Supplementary material for: Small non-coding RNAs have predicted roles in reproductive biology and transposable element regulation in the parasitic worm Strongyloides venezuelensis
Source: Research Square preprint supplement (doi:10.21203/rs.3.rs-5828314/v1), 2025-04-23
Supplement: Supplementary file 6 [file 5f02b61a972a5d141fbbe508.xlsx]

## Sheet: Sheet1
SI Table X9 - iL3s and 'activated' iL3s targets, GO terms and protein descriptions Table showing the numbers and % of sRNAs a) targeting genes, 3’UTR, 5’UTR, TEs, tRNAs or rRNAs. Top rows indicate map frequency with majority of reads mapping once (1x) and some mapping more than once (>1x) and bottom row indicates proportion of reads. b) Genes and protein descriptions of upregulated sRNAs. Gene en…
a) targets
		1x	>1x		1x	>1x		1x	>1x		1x	>1x		1x	>1x		1x	>1x
sRNA class	Reads	Gene			3'UTR			5'UTR			TE			tRNA			rRNA
'activated' iL3s	190	9	9		61	17		9	3		8	42		0	0		0	0
iL3s	275	10	11		19	3		3	1		19	26		0	0		0	0
%		1x	>1x	Tot	1x	>1x	Tot	1x	>1x	Tot	1x	>1x	Tot	1x	>1x	Tot	1x	>1x	Tot
sRNA class	Reads	Gene			3'UTR			5'UTR			TE			tRNA			rRNA
'activated' iL3s	190	4.73684	4.73684	9.47368	32.1053	8.94737	41.0526	4.73684	1.57895	6.31579	4.21053	22.1053	26.3158	0	0	0	0	0	0
iL3s	275	3.63636	4	7.63636	6.90909	1.09091	8	1.09091	0.363636	1.45455	6.90909	9.45455	16.3636	0	0	0	0	0	0
b) GO terms
'activated' iL3s GO terms to 3'UTR						iL3s GO terms to 3UTR						'activated' iL3s protein descript.			iL3s protein descript.
GO.ID	Term	Annotated	Significant	Expected	Fis	GO.ID	Term	Annotated	Significant	Expected	Fis	Gene	Protein Description		Gene	Protein Description
GO:0000276	mitochondrial proton-transporting ATP sy...	11	1	0	0.0023	GO:0071786	endoplasmic reticulum tubular network or...	2	1	0	0.0019	SVE_1798000	ATP synthase, H+ transporting, mitochondrial F0 complex, subunit g		SVE_0331400	WD40 repeat and WD40/YVTN repeat-like-containing domain and WD40-repeat-containing domain-containing protein
GO:0005753	mitochondrial proton-transporting ATP sy...	13	1	0	0.0028	GO:0009152	purine ribonucleotide biosynthetic proce...	138	2	0.13	0.0067	SVE_1651700	Zinc finger, RING-type domain and Zinc finger, C2H2 domain and Zinc finger, RING/FYVE/PHD-type domain and Zinc finger C2H2-type/integrase DNA-binding domain and Zinc finger, C2H2-like domain and Zinc finger, C3HC4 RING-type domain-containing protein		SVE_1798000	ATP synthase, H+ transporting, mitochondrial F0 complex, subunit g
GO:0045263	proton-transporting ATP synthase complex...	15	1	0	0.0032	GO:0006164	purine nucleotide biosynthetic process	142	2	0.13	0.0071	SVE_1331700	Nicotinic acetylcholine receptor beta 3 (Dbeta3) subunit		SVE_1509400	putative Transposon Ty3-I Gag-Pol polyprotein
GO:0045259	proton-transporting ATP synthase complex	25	1	0.01	0.0053	GO:0072522	purine-containing compound biosynthetic ...	148	2	0.14	0.0077	SVE_0363300	Hypothetical protein SRAE_2000465050		SVE_1331700	Nicotinic acetylcholine receptor beta 3 (Dbeta3) subunit
GO:0033177	proton-transporting two-sector ATPase co...	34	1	0.01	0.0072	GO:0009260	ribonucleotide biosynthetic process	152	2	0.14	0.0081	SVE_0934900	---NA---		SVE_0566400	Protein lunapark
						GO:0046390	ribose phosphate biosynthetic process	152	2	0.14	0.0081	SVE_2013700	unnamed protein product		SVE_0852300	unnamed protein product, partial
'activated' iL3s GO terms to Gene						GO:0000276	mitochondrial proton-transporting ATP sy...	11	1	0.01	0.0093	SVE_2007400	hypothetical protein L596_026066		SVE_0079500	Lipase EstA/Esterase EstB family-containing protein
GO.ID	Term	Annotated	Significant	Expected	Fis							SVE_0448400	---NA---		SVE_0699800	m7GpppN-mRNA hydrolase
GO:0036065	fucosylation	26	1	0.01	0.008	iL3s GO terms to Gene						SVE_1040200	unnamed protein product		SVE_0916600	Reverse transcriptase domain and Integrase, catalytic core domain and Zinc finger, CCHC-type domain and Ribonuclease H-like domain-containing protein
GO:0000152	nuclear ubiquitin ligase complex	12	1	0	0.0038	GO.ID	Term	Annotated	Significant	Expected	Fis	SVE_0347000	ShKT domain-containing protein		SVE_1032300	Hypothetical protein SRAE_1000090700
GO:0005680	anaphase-promoting complex	12	1	0	0.0038							SVE_0934900	---NA---		SVE_1076900	UDP-glucuronosyl/UDP-glucosyltransferase family-containing protein
GO:0031461	cullin-RING ubiquitin ligase complex	24	1	0.01	0.0076										SVE_1150700	---NA---
GO:0032580	Golgi cisterna membrane	27	1	0.01	0.0086										SVE_1640800	Atrial natriuretic peptide receptor 1
GO:0008417	fucosyltransferase activity	26	1	0.01	0.0066										SVE_2013700	unnamed protein product
GO:0004177	aminopeptidase activity	32	1	0.01	0.0081										SVE_2007400	hypothetical protein L596_026066
															SVE_0448400	---NA---
															SVE_1089400	BMA-NRF-5
															SVE_1995600	unnamed protein product
															SVE_0667400	Bm12134
															SVE_0347000	ShKT domain-containing protein
															SVE_1156300	unnamed protein product
															SVE_1517100	Hypothetical predicted protein
