# Supplementary material for: Small non-coding RNAs have predicted roles in reproductive biology and transposable element regulation in the parasitic worm Strongyloides venezuelensis
Source: Research Square preprint supplement (doi:10.21203/rs.3.rs-5828314/v1), 2025-04-23
Supplement: Supplementary file 7 [file 6a311011d2e15489fcbe340f.xlsx]

## Sheet: Sheet1
SI Table X5 - 25Gs targeting genes expressed in parastic and free-living females 25Gs a) expressed in free-living females, b) expressed in parasitic females and c) nonDE and their putative gene targets signifcantly upregulated in either parasitic and free-living females
a) genes targeted by free-living 25Gs													b) genes targeted by parasitic 25Gs
		edgeR results				Pseudocounts									edgeR results				Pseudocounts
FL		logFC	logCPM	PValue	FDR	FL1	FL2	FL3	P1	P2	P3				logFC	logCPM	PValue	FDR	FL1	FL2	FL3	P1	P2	P3
SVE_0673600	Zinc finger, RING-type domain and Zinc finger, RING/FYVE/PHD-type domain-containing protein	-8.28075	5.61979	6.76686e-80	2.20487e-77	2021.2	2084.7	2238.3	2.3	2.7	15.7		FL
SVE_1883200	Serine/threonine-protein kinase polo	-2.94626	6.70339	1.76624e-28	7.67333e-27	4944.2	3987.8	3066.6	480.7	492.2	584.4		PF
SVE_0388400	Pumilio RNA-binding repeat and Armadillo-like helical domain and Armadillo-type fold domain-containing protein	-1.65353	6.20887	0.000399227	0.0016839	1406.4	3818.1	2074.9	1348.7	685.2	285.6		SVE_1789900	Hypothetical protein	6.43118	7.05172	7.52021e-45	6.91859e-43	93.5	21.4	84.1	5101.8	5566	6473.4
SVE_1609900	Bax inhibitor 1	-1.08816	5.09827	2.16576e-05	0.000126579	1018.2	1183.6	820.6	452.6	508.3	461.4
SVE_1896000	Condensin-2 complex subunit H2	-1.52925	5.73205	2.38276e-10	3.20709e-09	1621.8	1551.1	1956.1	601.7	535.5	639.4		c) genes targeted by non-DE 25Gs
SVE_1862800	Rac GTPase-activating protein 1	-1.20155	5.69123	0.000294552	0.00129623	1183.9	970.2	2527	631.9	729	674.5				edgeR results				Pseudocounts
SVE_1585800	DNA replication licensing factor MCM4	-1.16061	5.75676	3.45855e-06	2.42346e-05	1286.2	1601	1969.8	736.7	683	752.6		FL		logFC	logCPM	PValue	FDR	FL1	FL2	FL3	P1	P2	P3
SVE_1629100	Gephyrin	-1.20093	4.52104	2.03104e-05	0.000120415	559.8	865.1	644.9	324	253.4	322.3		SVE_0813500	Reverse transcriptase domain and Integrase, catalytic core domain and Peptidase A2A, retrovirus, catalytic domain and Ribonuclease H-like domain and Peptidase A2A, retrovirus RVP subgroup domain and Aspartic peptidase domain-containing protein	-6.04194	12.0776	5.45129e-44	4.68452e-42	254804	222457	78231.9	2812.8	2736.4	2881.6
SVE_1609700	Hypothetical protein	-2.25541	2.5871	6.75816e-09	7.36055e-08	204.4	139.5	278.1	43.2	43.1	43.8		SVE_1402000	Integrase, catalytic core domain and Ribonuclease H-like domain-containing protein	-6.05683	10.4509	1.17298e-36	7.77347e-35	74580	84116.3	21175.7	872.8	823.5	1005.5
SVE_1706300	Hypothetical protein	-1.08931	3.09767	0.000938543	0.00349829	246.7	303.8	193.4	137.1	114.3	97.5		SVE_0673600	Zinc finger, RING-type domain and Zinc finger, RING/FYVE/PHD-type domain-containing protein	-8.28075	5.61979	6.76686e-80	2.20487e-77	2021.2	2084.7	2238.3	2.3	2.7	15.7
SVE_0322700	Inversin	-4.31594	3.48766	2.43346e-24	8.85099e-23	431.3	646.1	273.9	21.6	24.1	22		SVE_0506700	DNA topoisomerase 2-beta	-1.48793	8.64132	0.000295082	0.00129783	7587.7	6665.3	24132.8	3697.6	5114.4	4873.5
SVE_0184600	Armadillo segment polarity protein	-1.22173	4.40025	2.12711e-05	0.000124786	554.4	788.1	567.6	289.5	216.3	312.8		SVE_1883200	Serine/threonine-protein kinase polo	-2.94626	6.70339	1.76624e-28	7.67333e-27	4944.2	3987.8	3066.6	480.7	492.2	584.4
SVE_1033900	Hypothetical protein	-1.76058	3.94315	9.22056e-06	5.84791e-05	634.3	657.9	233.6	198.6	119	131.9		SVE_0388400	Pumilio RNA-binding repeat and Armadillo-like helical domain and Armadillo-type fold domain-containing protein	-1.65353	6.20887	0.000399227	0.0016839	1406.4	3818.1	2074.9	1348.7	685.2	285.6
SVE_0178400	Hypothetical protein	-3.27959	0.137946	2.62614e-08	2.63964e-07	38.3	41	26.8	2.2	5.2	3.7		SVE_0502100	Lamin Tail Domain domain and Intermediate filament protein family-containing protein	-1.3767	6.76393	0.00188725	0.00642902	1909.4	1470.2	6839.3	1282.2	1322.3	1330.5
SVE_1940800	Hypothetical protein	-1.37556	0.784367	0.00503202	0.0149224	46.9	63.1	36.1	8.8	28.2	19.9		SVE_1727300	Leucine-rich repeat and Leucine-rich repeat, typical subtype-containing protein	-1.01934	7.0761	3.36802e-05	0.000187726	3460.4	3814.4	4499.7	2226.2	1572.2	2008.4
SVE_1500100	Reverse transcriptase domain and Integrase, catalytic core domain and Ribonuclease H-like domain and Aspartic peptidase domain-containing protein	-1.69826	2.11684	3.66334e-06	2.5578e-05	136.3	135.3	140.2	46.4	44.7	35.4		SVE_0767700	Peptidase A2A, retrovirus RVP subgroup domain and Aspartic peptidase domain-containing protein	-3.03911	5.78522	1.08639e-25	4.14417e-24	2013	1631	2737.2	313.1	232.5	228.5
													SVE_1940000	Serine/arginine repetitive matrix protein 1	-1.15378	5.75621	2.19124e-05	0.000127782	1383.1	1314.6	2151.7	869.4	640.4	667.6
PF													SVE_1636800	Structural maintenance of chromosomes protein 4	-1.09153	7.43454	0.00129157	0.00462671	4128.8	2971.3	8246.4	2940.1	2045.1	2215.1
SVE_1535500	Reverse transcriptase domain and Aspartic peptidase domain-containing protein	1.37216	3.77053	1.33901e-05	8.24495e-05	162.1	137.7	197.7	547.5	319.4	419.4		SVE_0562000	G2/mitotic-specific cyclin-B3	-1.27617	5.34709	1.63885e-06	1.21247e-05	905.1	1413.1	1421.2	482.9	547.7	514.1
SVE_0693500	M-phase inducer phosphatase family and Rhodanese-like domain-containing protein	1.05851	2.94273	0.00132738	0.00473114	134.7	103.5	87.6	234.4	197.2	247.4		SVE_1229600	DNA mismatch repair protein MutS, C-terminal domain and DNA mismatch repair protein MutS, core domain and DNA mismatch repair protein MutS, clamp domain and P-loop containing nucleoside triphosphate hydrolase domain-containing protein	-1.48619	6.27436	2.7114e-07	2.35329e-06	3138.3	1586.6	2698.2	1057.4	708.2	882.2
SVE_0679700	WD40 repeat and WD40/YVTN repeat-like-containing domain and WD40-repeat-containing domain-containing protein	1.85234	2.59791	2.68185e-06	1.92052e-05	49.5	84.2	39.5	183.7	276.8	167		SVE_0749300	Saposin-like type B, 1 domain and Saposin B domain and Saposin-like domain-containing protein	-2.46864	4.77326	3.78406e-17	9.24729e-16	1129.5	1123.8	738.2	209.5	161.5	168.1
SVE_0524300	Protein argonaute-2	3.10253	3.79379	2.32052e-18	6.17227e-17	64.1	90.3	35.8	572.5	551.7	514.4		SVE_1081100	Oxysterol-binding protein 2	-1.17525	6.37083	8.34548e-07	6.60543e-06	2089.8	2652.2	2724.7	1199	1164.9	941.4
SVE_1883700	Serine/threonine-protein kinase polo	1.72608	4.58132	1.29074e-09	1.57466e-08	296.9	180.9	249.6	691.4	858.1	858.1		SVE_1647500	THO complex subunit 4	-1.67852	4.21222	1.71813e-09	2.06386e-08	627.7	595.1	595.6	156.7	212.6	200.3
SVE_0637400	UV radiation resistance protein/autophagy-related protein 14 family-containing protein	1.03041	4.8601	8.14386e-05	0.000415157	446.5	381.5	418.3	1023.9	728.4	791.5		SVE_0139300	Initiation factor eIF-4 gamma, MA3 domain and MIF4-like, type 1/2/3 domain and Armadillo-type fold domain-containing protein	-1.02104	5.50436	4.10247e-05	0.000224502	1169.9	1425.2	1355.1	541.3	686.1	721.2
SVE_1725800	Complex 1 LYR protein family-containing protein	1.18584	2.66471	0.000429036	0.00179032	83.8	102	67.6	170.7	194.5	212.8		SVE_1387700	Peptidase A2A, retrovirus RVP subgroup domain and Aspartic peptidase domain-containing protein	-3.00537	4.69928	1.54451e-22	5.18373e-21	936.9	781.2	1262	137.1	100.2	132.7
SVE_1802400	28S ribosomal protein S7, mitochondrial	1.70837	4.00268	8.29103e-09	8.89381e-08	160.1	192.7	139.1	423.5	592.3	595.5		SVE_1896000	Condensin-2 complex subunit H2	-1.52925	5.73205	2.38276e-10	3.20709e-09	1621.8	1551.1	1956.1	601.7	535.5	639.4
SVE_1341600	Las1-like family-containing protein	1.86141	4.79739	5.30777e-11	7.64397e-10	296	292.9	196.2	776.8	1046.8	1033		SVE_0167900	Protein of unknown function DUF1356, TMEM106 family-containing protein	-1.03879	4.79667	6.16128e-05	0.000323581	850.6	668.2	904.8	410.5	391	377.6
SVE_0237300	Hypothetical protein	12.0467	7.08703	1.8391e-160	1.43818e-156	3	1	0	5798.4	5693.2	6273.4		SVE_1060800	Proteasome activator complex subunit 4B	-5.97493	5.94858	3.25339e-30	1.55131e-28	2867.3	3951	1063.7	32.5	25.9	66.6
SVE_0391300	Reverse transcriptase domain and Integrase, catalytic core domain and Ribonuclease H-like domain and Aspartic peptidase domain-containing protein	1.87639	6.90463	9.01718e-15	1.86546e-13	1200.3	922.9	1225.8	3951.3	3894.2	4450.5		SVE_1862800	Rac GTPase-activating protein 1	-1.20155	5.69123	0.000294552	0.00129623	1183.9	970.2	2527	631.9	729	674.5
SVE_0256400	Fizzy/cell division cycle 20 related 1	1.14282	5.97481	3.89813e-05	0.000214521	950.3	1063.5	544.9	1666.8	2010.1	1975.6		SVE_1480800	Hypothetical protein	-1.18013	5.26673	5.28027e-05	0.000283014	1000.8	1525.1	942.1	665.2	396	467.1
SVE_0091400	ATP-dependent DNA helicase Q5	1.3253	6.11649	1.13403e-08	1.18875e-07	941.3	896.7	745.6	2284.6	2124.7	2065.4		SVE_1926300	Hypothetical protein	-1.16194	4.13662	0.00023182	0.0010589	519.3	625.8	424.4	314.1	164.4	220.9
SVE_0787400	Tudor domain-containing protein	1.17872	7.00976	8.70793e-07	6.87838e-06	2067.5	1624.3	1461.3	3836.8	3759.4	4069.8		SVE_0740200	Hypothetical protein	-1.41413	6.63214	2.26965e-09	2.65698e-08	3183.3	3302.5	2906	1410.6	1100.1	1010.6
SVE_1915000	Hypothetical protein	1.2572	3.52934	0.00022313	0.00102219	143	176.6	126.3	216.2	419.8	432.6		SVE_0471700	Isovaleryl Coenzyme A dehydrogenase	-1.44234	4.62171	3.15966e-08	3.13959e-07	692.2	777.9	857.6	292.7	286.2	277.3
SVE_0827400	Polybromo	1.28095	7.90444	1.9898e-08	2.02607e-07	2974.7	2967.9	3172.9	7320.4	7095.9	7735.2		SVE_0169800	RNA recognition motif domain and SAP domain and Nucleotide-binding, alpha-beta plait domain-containing protein	-1.26804	5.42207	2.16911e-06	1.56769e-05	937.8	1434.1	1562.1	559.5	570.2	503.5
SVE_0681100	Aminotransferase, class I/classII domain and Pyridoxal phosphate-dependent transferase, major region, subdomain 1 and Pyridoxal phosphate-dependent transferase, major region, subdomain 2 and Pyridoxal phosphate-dependent transferase domain-containing protein	1.21879	7.96123	1.56072e-06	1.16347e-05	3761.6	3545.1	2466.6	8777.5	6856.9	7112.5		SVE_1882900	Serine/threonine-protein kinase polo	-4.31784	4.03746	5.11416e-29	2.29843e-27	894.9	665.3	439.1	41	27	31.3
SVE_0312600	SANT associated domain-containing protein	1.14108	6.47356	6.05714e-07	4.95988e-06	1356.5	1191.4	1070.3	2400.2	2840.5	2741.2		SVE_0014100	Hypothetical protein	-1.32232	4.63517	1.29688e-06	9.76092e-06	726.3	943	627.5	333.7	293.9	290.2
SVE_0355900	Helicase, C-terminal domain and Helicase-associated domain and DNA/RNA helicase, DEAD/DEAH box type, N-terminal domain and Domain of unknown function DUF1605 domain and Helicase, superfamily 1/2, ATP-binding domain and P-loop containing nucleoside triphosphate hydrolase domain-containing protein	1.16538	8.05966	2.61472e-06	1.87588e-05	4256.4	3766.2	2713.3	8225.6	7578.5	8276.6		SVE_0472600	Hypothetical protein	-2.31443	3.76016	5.132e-10	6.63342e-09	270.4	567.8	604.8	105.8	111.5	72.3
SVE_1076100	Astacin-like metalloendopeptidase	10.3304	5.13548	6.91186e-101	5.5031e-98	1.4	0	2.3	1209.9	1621.2	1783.5		SVE_1629100	Gephyrin	-1.20093	4.52104	2.03104e-05	0.000120415	559.8	865.1	644.9	324	253.4	322.3
SVE_0156400	Histone H3 family and Histone core domain and Histone-fold domain-containing protein	1.02738	6.86637	1.95119e-05	0.000115945	1667.6	1795.2	1548	2752.4	3519.6	3945.2		SVE_0484500	Hypothetical protein	-1.34439	4.67958	0.000336222	0.00145452	538.4	521.7	1320	300.3	396.8	240
SVE_0872200	Hypothetical protein	1.09029	6.76246	8.53518e-06	5.47091e-05	1854.9	1282.4	1390.7	2776.1	3556.6	3309.9		SVE_1737100	EG:86E4.5 protein	-1.36048	4.81837	1.0145e-05	6.40823e-05	940.6	1124.3	565	408.2	336.8	278.1
SVE_0810200	AAA+ ATPase domain and ATPase, AAA-type, core domain and P-loop containing nucleoside triphosphate hydrolase domain-containing protein	1.27287	6.9028	5.19318e-08	4.99517e-07	1538.2	1658.7	1374.2	3275.2	3738.5	4034.9		SVE_1955100	Breast carcinoma-amplified sequence 3	-1.03024	5.66328	8.22557e-06	5.30726e-05	1466.6	1463.9	1492.4	737.8	720.1	707.4
SVE_1567400	Hypothetical protein	1.50385	6.50562	9.55317e-10	1.19529e-08	1042.7	1037.1	1012.5	2190.7	3126.6	3456.6		SVE_1763900	G-protein-signaling modulator 1	-1.21897	4.98872	1.60355e-06	1.19206e-05	927.4	846.1	1106.5	424.5	391.2	421
SVE_1041500	SET domain and Post-SET domain-containing protein	1.27466	6.83083	3.23233e-06	2.28315e-05	1814.7	1338.9	1191.7	2497.5	4113.5	3905.4		SVE_0957100	Kinesin-73	-1.57426	5.23575	6.97508e-06	4.59908e-05	1176.2	607.1	1876.1	434.2	391.2	403
SVE_1183600	Zinc finger, BED-type predicted domain-containing protein	1.04441	7.29946	1.95275e-05	0.000115949	2224.4	1862.4	2625.4	3917.9	4828.7	5099.3		SVE_0416800	Armadillo-like helical domain and Armadillo-type fold domain-containing protein	-1.05649	6.11656	7.36668e-06	4.82071e-05	1689.1	2097.6	2310.7	1012.1	981.9	937.2
SVE_1091400	Hypothetical protein	1.08003	6.41036	0.00603579	0.0174556	1067.7	1678.7	819.6	1067.5	2588.3	3884.5		SVE_1739600	FCH domain and SH3 domain-containing protein	-1.03558	4.83101	0.000112502	0.00055576	814.3	997.6	668.2	442.8	359.8	406.5
SVE_1816300	GPI transamidase component PIG-T	1.11146	7.70795	4.61663e-06	3.18641e-05	2673.4	3530.5	2428.1	5903.2	6399.8	6350.1		SVE_0533200	Mlh1	-1.03797	5.25143	0.00130083	0.00465046	902.6	711.7	1713.1	630.7	485.1	503.5
SVE_1102900	Cyclin-dependent kinase 1	1.61691	6.63711	7.99397e-11	1.13248e-09	1024.9	1081.7	1088.4	2404.6	3687.3	3712.1		SVE_1910500	Protein phosphatase 2C (PP2C)-like domain-containing protein	-1.08106	4.88554	2.23334e-05	0.000129849	735.7	938.7	927.6	397.5	424.4	408.4
SVE_0082500	Probable ATP-dependent RNA helicase DDX47	1.39903	7.49777	1.96921e-09	2.33312e-08	2345.9	2101.4	2037.9	5162.2	6289	5654		SVE_0307800	Myotubularin-related protein 5	-1.32794	5.9318	3.08114e-06	2.19041e-05	1921.2	2540	1215	816.6	707.4	736.6
SVE_0072700	Hypothetical protein	1.25494	6.79759	8.76319e-07	6.89225e-06	1437.3	1354	1496	2472.7	3650.3	4112.6		SVE_1841200	Regulator of G protein signalling domain and Regulator of G protein signalling superfamily domain and Regulator of G-protein signalling, domain 1-containing protein	-2.26684	3.41666	4.35536e-11	6.30721e-10	276.8	427.3	421.4	86.4	90.9	56
SVE_0336400	Fanconi anemia group J protein	1.50666	8.68428	1.29015e-09	1.57466e-08	5179.7	5217.5	3576.4	13657.8	13424.4	12626		SVE_0311200	Ras-related protein Rab-10	-1.47647	2.67079	0.000149127	0.000716325	143.9	192.2	255.1	48.8	69.4	95
SVE_0312500	Restin homolog	1.26699	9.37938	1.22106e-07	1.1142e-06	9758.1	8173.4	7578.3	17638.3	21653.1	22103.2		SVE_1706300	Hypothetical protein	-1.08931	3.09767	0.000938543	0.00349829	246.7	303.8	193.4	137.1	114.3	97.5
SVE_0255200	Protein Wnt-4	1.20194	7.97215	7.44412e-05	0.000383738	3027.7	4594.8	2305.6	5285.5	9243.2	8314.6		SVE_1985100	Hypothetical protein	-1.1192	5.65654	0.00031237	0.0013601	1250.2	1029.5	2211.3	854.3	558.5	652.9
SVE_1939500	PRP19/PSO4 homolog	1.06512	8.74259	3.41393e-05	0.000190149	6392.7	5784.4	5896.6	8992.6	14184.9	14642.5		SVE_0938900	Low-density lipoprotein receptor-related protein 6	-1.39782	4.52947	4.97071e-06	3.40376e-05	565.9	971.3	627.6	345.5	243.8	230.6
SVE_1050700	Hypothetical protein	1.63181	7.67426	2.28416e-09	2.66998e-08	2341.8	2228	1934.1	4498	7461.5	8200.8		SVE_0427300	DNA primase large subunit	-1.02142	4.25061	0.00105369	0.00387576	458.3	413.3	776.7	233.4	296.9	282.3
SVE_0148700	Hypothetical protein	1.29953	9.54593	1.10124e-06	8.44283e-06	9632.5	11719.1	6825.8	19160.3	26189.7	24011.7		SVE_1953300	Guanine nucleotide-binding protein G(k) subunit alpha	-1.27844	3.49704	0.00120695	0.00436354	192	558.7	273.5	142.6	165.5	114
SVE_0601500	Nuclear RNA export factor 2	1.79776	9.05558	9.56407e-11	1.34516e-09	6063.1	5385.6	4062	12862.9	19079.6	21989.3		SVE_0478800	Transcription termination factor 2	-1.76376	4.29666	1.00943e-10	1.41211e-09	673.4	575.3	708.8	204.1	185.4	186.1
SVE_0544400	Hypothetical protein	1.48546	9.23227	0.000118313	0.000580152	6538.2	8727.7	5387.8	7524.8	24378.5	25931		SVE_0557500	Pre-mRNA cleavage complex 2 protein Pcf11	-1.13732	4.80431	5.08569e-05	0.000272771	808.9	617.2	1063.9	413.7	368.6	348.6
SVE_0322100	Mitotic checkpoint protein BUB3	1.22695	8.65654	2.14451e-05	0.000125604	5081.9	3874.5	6806.2	8569.2	14130.5	14197.8		SVE_0322700	Inversin	-4.31594	3.48766	2.43346e-24	8.85099e-23	431.3	646.1	273.9	21.6	24.1	22
SVE_1900700	Transmembrane protein 209	1.35859	9.50496	2.36698e-09	2.76265e-08	8947.5	8467.1	9184	21434	22676.4	24099.1		SVE_1387500	Reverse transcriptase domain and Integrase, catalytic core domain and Ribonuclease H-like domain-containing protein	-2.31102	3.70036	1.51691e-12	2.5401e-11	446.3	449	489.2	127.3	66.9	82.6
SVE_1824400	Zinc finger, CCCH-type domain-containing protein	1.22638	8.87026	0.000164132	0.000781201	6836.5	5518.4	5929.5	7138.1	16402.8	19243.6		SVE_0600200	Hypothetical protein	-1.79134	2.79932	7.0613e-07	5.72815e-06	187.7	304.7	188.4	60.5	72.5	64
SVE_0383800	Kinesin-like protein KIF2A	1.35008	9.6262	3.56531e-07	3.05041e-06	11466.1	9977.5	7609.6	18651.6	27938.4	27478		SVE_0362800	Proteasome subunit alpha type	-1.03721	3.10565	0.00174585	0.00602496	266.6	222.6	250.3	105.9	159.1	95.8
SVE_0421000	Innexin family-containing protein	1.02739	9.50137	0.00035489	0.00152737	10590	13294.1	7240.5	15787	26850.9	20807.8		SVE_0951100	Histone H3.2	-1.28495	2.07189	0.00212531	0.00714529	109.5	119.7	142.6	32.6	77.8	42.6
SVE_0439000	Acidic leucine-rich nuclear phosphoprotein 32 family member A	1.20054	8.3524	0.00061892	0.00245185	3780	4840.8	4310.6	4344.8	11695.3	13682.4		SVE_1835300	Replication protein A 70 kDa DNA-binding subunit	-1.32216	3.95095	5.68784e-05	0.000302578	392.2	610	420.2	222.4	221.7	123.9
SVE_0156100	Transthyretin-like family-containing protein	2.19911	6.90705	1.63881e-17	4.12073e-16	892	973.1	937.5	3185.6	4617.2	5071.5		SVE_0184600	Armadillo segment polarity protein	-1.22173	4.40025	2.12711e-05	0.000124786	554.4	788.1	567.6	289.5	216.3	312.8
SVE_1884300	Dolichyl-diphosphooligosaccharide--protein glycosyltransferase 48 kDa subunit	1.14179	9.71111	0.000152902	0.000733555	12777.2	12990.5	8339.6	15335.5	30273.8	29653.9		SVE_1594500	GRAF ortholog	-1.06882	4.26488	0.000187462	0.000875195	515	710.8	456.6	300.2	243.7	257.3
SVE_1586600	Protein kinase domain and Serine/threonine- /dual specificity protein kinase, catalytic domain and Protein kinase-like domain-containing protein	2.29858	8.87485	1.59575e-14	3.24124e-13	3163.3	4080.9	3105.4	10415.3	20079.4	20429.2		SVE_1026400	Coagulation factor 5/8 C-terminal type domain and Protein kinase domain and Serine-threonine/tyrosine-protein kinase catalytic domain and Galactose-binding domain-like and Protein kinase-like domain and Tyrosine-protein kinase, catalytic domain-containing protein	-1.69416	3.9292	8.98642e-07	7.0556e-06	379.1	755.1	360.6	164.2	139	158.5
SVE_1729900	Low-density lipoprotein (LDL) receptor class A repeat-containing protein	1.12315	11.0079	0.000440809	0.00183455	36450.4	24684.1	23406.9	34176	72884.9	77092.1		SVE_1715700	Hypothetical protein	-1.48128	2.73981	1.5665e-05	9.4888e-05	194.1	184.1	243.4	61.7	76.6	85
SVE_0066800	Rac GTPase-activating protein 1	1.67143	10.4831	7.35621e-09	7.96753e-08	17564.2	15484	11575.5	31215.2	54897.3	56031.6		SVE_0990100	Mitochondrial fission 1 protein	-1.0318	2.06431	0.00684181	0.0194062	143.6	125	83.1	54	66.6	51.5
SVE_0434200	Spectrin beta chain, erythrocytic	1.48579	11.7865	6.03819e-07	4.95474e-06	52503.3	31001.6	37772.6	74329.5	128674	136663		SVE_0663800	Required for meiotic nuclear division 5 homolog B	-1.28288	2.99494	0.000178464	0.000841221	208.9	200.1	310.2	87.6	115.1	93.3
SVE_1004500	Zinc finger, nanos-type domain-containing protein	1.13924	10.5817	6.03752e-05	0.000318794	22313.4	22656.2	17468	29006.2	51862.2	56663.7		SVE_1961500	Hypothetical protein	-1.01809	3.90845	0.000363877	0.00155759	384.8	474.5	436.9	235.4	231.5	172.4
SVE_0566500	Low-density lipoprotein (LDL) receptor class A repeat-containing protein	3.16011	14.4099	2.04128e-17	5.11629e-16	127244	102632	55889.7	491639	1.01546e+06	1.04735e+06		SVE_1037100	Hypothetical protein	-1.67319	1.51523	0.000118064	0.000579573	94.2	57	113.5	22.8	34.6	25.8
													SVE_0192400	Leucine-rich repeat flightless-interacting protein family-containing protein	-1.28316	3.23564	0.000125241	0.000612115	201.8	271.2	380.4	129.6	112.5	108
													SVE_1780000	Reverse transcriptase domain and Integrase, catalytic core domain and Ribonuclease H-like domain and Aspartic peptidase domain-containing protein	-2.02565	4.1776	6.6113e-10	8.40656e-09	852.7	412.5	604.9	174.9	142.6	140.8
													SVE_1985800	Protein kinase domain and Serine/threonine- /dual specificity protein kinase, catalytic domain and Protein kinase-like domain-containing protein	-1.25097	3.27855	0.000117071	0.000575058	245	252	377.4	143.6	119.9	102.9
													SVE_0946800	Helicase POLQ-like	-1.07261	3.3423	0.00033426	0.00144735	283.4	306	291.7	152.3	115.1	150.9
													SVE_0174700	Hypothetical protein	-1.47556	3.42842	2.92998e-06	2.08865e-05	270.8	431	310.9	133.9	119.8	109.9
													SVE_0608100	Hypothetical protein	-1.4661	2.5218	1.90591e-05	0.000113513	184.1	174.9	171.5	59.4	74.1	58.8
													SVE_1305900	Integrase, catalytic core domain and Ribonuclease H-like domain-containing protein	-1.50574	3.38948	1.48802e-05	9.06256e-05	309.9	289.4	392.2	151.1	69.4	127.2
													SVE_1629200	Anaphase-promoting complex subunit 10	-1.36519	1.75702	0.00328374	0.0103544	70.3	75.1	155.5	48.5	46	21.7
													SVE_1033900	Hypothetical protein	-1.76058	3.94315	9.22056e-06	5.84791e-05	634.3	657.9	233.6	198.6	119	131.9
													SVE_0299500	WD repeat domain phosphoinositide-interacting protein 4	-1.18635	2.51101	0.00071978	0.00277509	147.6	150.7	202	75.6	60.7	83.3
													SVE_0757600	Synaptosomal-associated protein 29	-1.43914	1.77018	0.000990696	0.00366994	75.1	158.2	73.2	32.5	39.2	41.6
													SVE_1054500	T-complex 11 family-containing protein	-1.04368	2.97226	0.00213993	0.00718516	174	229.1	271.4	132.8	103.2	90.2
													SVE_0754800	Regulator of nonsense transcripts 1	-1.63297	3.07985	7.91563e-07	6.34874e-06	251.3	307.4	253.7	91.8	66.7	103.1
													SVE_1016100	GDP-D-glucose phosphorylase 1	-1.24141	2.21361	0.00123654	0.00445609	108.6	178.7	120.6	46.5	63.2	63.4
													SVE_0523900	Arfaptin homology (AH) domain and Arfaptin homology (AH) domain/BAR domain-containing protein	-1.09263	1.79156	0.00348845	0.0109162	93.3	109.5	89.9	56.1	36.5	44
													SVE_0531300	DNA-directed RNA polymerase II subunit RPB7	-1.20779	0.776607	0.00869243	0.0238257	37.8	58.5	45	13.1	30.1	18.6
													SVE_0178400	Hypothetical protein	-3.27959	0.137946	2.62614e-08	2.63964e-07	38.3	41	26.8	2.2	5.2	3.7
													SVE_0420500	Hypothetical protein	-1.27402	1.43054	0.00184741	0.00631967	56	99.4	77.2	34.5	35.2	26.2
													SVE_1940800	Hypothetical protein	-1.37556	0.784367	0.00503202	0.0149224	46.9	63.1	36.1	8.8	28.2	19.9
													SVE_1924700	Hypothetical protein	-1.35394	0.465399	0.00278299	0.00898554	36	47.3	31.2	15.1	10.2	19.3
													SVE_1852300	DOMINA protein	-1.63155	0.847639	0.00122526	0.00441953	41.2	79.3	38.9	16.2	26.3	8.6
													SVE_1500100	Reverse transcriptase domain and Integrase, catalytic core domain and Ribonuclease H-like domain and Aspartic peptidase domain-containing protein	-1.69826	2.11684	3.66334e-06	2.5578e-05	136.3	135.3	140.2	46.4	44.7	35.4
													PF
													SVE_1123900	Reverse transcriptase domain-containing protein	1.45099	1.81072	0.00224596	0.00751859	55.1	13.7	54.9	128.5	99.8	109.6
													SVE_0764800	Reverse transcriptase domain and Integrase, catalytic core domain and Zinc finger, CCHC-type domain and Ribonuclease H-like domain and Aspartic peptidase domain-containing protein	3.52324	1.55722	1.05961e-05	6.65556e-05	3.5	0	29.8	147.9	100.1	118.7
													SVE_1535500	Reverse transcriptase domain and Aspartic peptidase domain-containing protein	1.37216	3.77053	1.33901e-05	8.24495e-05	162.1	137.7	197.7	547.5	319.4	419.4
													SVE_1665700	Reverse transcriptase domain and Integrase, catalytic core domain and Ribonuclease H-like domain-containing protein	2.06267	1.88913	8.56909e-07	6.77556e-06	49.3	26.3	19.5	125.3	145.4	127.8
													SVE_1860400	Ribosome biogenesis regulatory protein homolog	1.01868	1.4068	0.00837414	0.0231241	33.9	50.3	29.7	73.5	68	90.4
													SVE_1804600	Hypothetical protein	1.30251	1.31864	0.00471289	0.014126	24.2	54.1	15.8	89.6	62.7	80.1
													SVE_0000195350	P-loop containing nucleoside triphosphate hydrolase domain-containing protein	1.31583	1.48981	0.000666896	0.00261018	32.6	47.6	25.3	80	88	96.2
													SVE_0693500	M-phase inducer phosphatase family and Rhodanese-like domain-containing protein	1.05851	2.94273	0.00132738	0.00473114	134.7	103.5	87.6	234.4	197.2	247.4
													SVE_1090900	Hypothetical protein	1.37797	1.88256	0.000478165	0.0019608	42.8	37.5	54.7	91.9	160.7	99.2
													SVE_0516100	Hypothetical protein	1.06595	4.26631	0.00481407	0.0143742	296.6	399.9	115.6	621.1	574.2	505.5
													SVE_0150300	Enoyl-CoA delta isomerase 2, mitochondrial	1.35555	3.14668	0.000363935	0.00155759	70.2	167.1	89	212.9	278.7	345
													SVE_0679700	WD40 repeat and WD40/YVTN repeat-like-containing domain and WD40-repeat-containing domain-containing protein	1.85234	2.59791	2.68185e-06	1.92052e-05	49.5	84.2	39.5	183.7	276.8	167
													SVE_1811600	OB-fold nucleic acid binding domain, AA-tRNA synthetase-type and Nucleic acid-binding, OB-fold domain-containing protein	2.30888	2.05502	4.642e-06	3.19828e-05	52.3	31.8	9.2	137.2	193.1	132
													SVE_0237200	Hypothetical protein	1.91482	3.38071	1.94407e-09	2.31043e-08	96.8	105	84.9	401.8	267.1	413
													SVE_1913900	Hypothetical protein	1.02168	1.74082	0.013562	0.0346131	49.8	67.9	25.8	110.1	90.2	91.5
													SVE_1943800	Zinc finger, RING/FYVE/PHD-type domain-containing protein	3.61995	1.35849	2.86237e-16	6.58346e-15	11.1	5	10.1	94	113.9	118.1
													SVE_0524300	Protein argonaute-2	3.10253	3.79379	2.32052e-18	6.17227e-17	64.1	90.3	35.8	572.5	551.7	514.4
													SVE_0695900	Ras-related protein Rab-7a	1.07584	2.82885	0.000769929	0.00294562	102.9	84.8	111	226.8	195	207.9
													SVE_1790000	Condensin-2 complex subunit H2	6.36812	3.86204	3.15859e-15	6.712e-14	23.1	0.9	0	838	611.8	446.4
													SVE_1851900	Acetylcholinesterase	8.24535	3.82756	4.0575e-69	9.91552e-67	1.2	0.9	3.8	678.3	632.1	562
													SVE_0681300	Alpha actinin	2.20421	5.00127	1.17591e-11	1.77864e-10	204.1	362.5	180.4	1316.7	858.1	1269.9
													SVE_1883700	Serine/threonine-protein kinase polo	1.72608	4.58132	1.29074e-09	1.57466e-08	296.9	180.9	249.6	691.4	858.1	858.1
													SVE_1096900	Hypothetical protein	1.14173	3.60631	0.000253752	0.0011399	136.6	204.1	155.8	282.1	377.7	438.2
													SVE_1911300	Protein AATF	1.07788	5.10961	1.4023e-05	8.59402e-05	483.2	540.9	424.5	937.6	1127.2	995.4
													SVE_1623500	Serine/threonine-protein kinase polo	1.31597	5.22315	5.42518e-06	3.68272e-05	503.8	302.1	592.6	1175.2	999.6	1306.2
													SVE_0171900	Hypothetical protein	1.99313	3.86853	4.51904e-10	5.89965e-09	92.8	153.2	138.9	389	558.7	587.9
													SVE_0088000	Hypothetical protein	1.20466	5.33933	4.1501e-05	0.00022695	745.1	357.4	497.6	1144	1135.7	1408.1
													SVE_1956700	Mutagen-sensitive 301	2.33248	5.25799	5.01016e-12	7.97953e-11	383.9	299.5	145.8	1659.1	1201.6	1316.3
													SVE_1579800	Kelch-like protein diablo	1.08366	6.21497	6.57854e-05	0.000344339	1319.3	1122	666.5	2153.9	2279.6	2154.6
													SVE_0177400	Histone H1.0	1.9004	3.17799	2.72163e-09	3.15774e-08	100.6	72.6	78.5	262.6	354.6	324.3
													SVE_0066400	Derlin-1	1.12282	4.53044	0.000228868	0.00104786	363.5	390.2	196	594.2	738.4	737.9
													SVE_1363200	Histone methylation DOT1 domain and Histone H3-K79 methyltransferase family-containing protein	1.18196	5.19341	0.00038508	0.00163304	437.3	751.3	273.1	990.6	1237.4	1090.1
													SVE_1010400	Hypothetical protein	1.21806	5.63665	3.44559e-07	2.95444e-06	695.9	688.4	568.2	1465.8	1494.5	1583.7
													SVE_0679000	Hypothetical protein	1.2551	4.25615	1.40137e-05	8.59402e-05	299.6	229.4	208.5	470	700.2	592.4
													SVE_1832400	NAD kinase 2, mitochondrial	1.11987	5.34395	3.25785e-06	2.29724e-05	548.6	593.1	529	1114.8	1204.5	1313.7
													SVE_1802400	28S ribosomal protein S7, mitochondrial	1.70837	4.00268	8.29103e-09	8.89381e-08	160.1	192.7	139.1	423.5	592.3	595.5
													SVE_1341600	Las1-like family-containing protein	1.86141	4.79739	5.30777e-11	7.64397e-10	296	292.9	196.2	776.8	1046.8	1033
													SVE_0237300	Hypothetical protein	12.0467	7.08703	1.8391e-160	1.43818e-156	3	1	0	5798.4	5693.2	6273.4
													SVE_0391300	Reverse transcriptase domain and Integrase, catalytic core domain and Ribonuclease H-like domain and Aspartic peptidase domain-containing protein	1.87639	6.90463	9.01718e-15	1.86546e-13	1200.3	922.9	1225.8	3951.3	3894.2	4450.5
													SVE_0980000	Hypothetical protein	1.72504	3.78447	1.21586e-07	1.11075e-06	145.9	182	91.6	379.2	502.6	508
													SVE_0419000	Hypothetical protein	1.33818	5.16416	7.63606e-07	6.16244e-06	416.9	571	339.2	1011.1	1153.8	1193.5
													SVE_1060400	Hypothetical protein	1.18504	4.37475	1.81581e-05	0.000108726	234.1	309.1	284.6	507.8	654.4	722.8
													SVE_0284500	Integrator 6	1.06608	6.99616	1.37694e-05	8.47049e-05	1893.3	2100.9	1390.4	4034.4	3583.7	3656.5
													SVE_1252300	LRAT-like domain-containing protein	9.39231	3.02989	1.30882e-40	9.93688e-39	1.5	0	0	202.2	385	509.9
													SVE_0593300	LSM8 homolog, U6 small nuclear RNA associated (S. cerevisiae)	1.51636	3.16417	6.04099e-06	4.0342e-05	78.6	128.9	97.2	223.7	324.8	325.7
													SVE_0256400	Fizzy/cell division cycle 20 related 1	1.14282	5.97481	3.89813e-05	0.000214521	950.3	1063.5	544.9	1666.8	2010.1	1975.6
													SVE_1755900	SET domain and Pre-SET domain-containing protein	1.07821	5.73798	1.50205e-05	9.13378e-05	870	691.9	677	1272.6	1677.3	1780.1
													SVE_0983300	BRCA2 and CDKN1A-interacting protein	1.87276	4.60947	2.26916e-10	3.06473e-09	262.7	257.2	165.4	653.6	941.9	918.1
													SVE_1102800	Zinc finger, RING-type domain and Zinc finger, RING/FYVE/PHD-type domain-containing protein	1.02487	5.31226	3.8003e-05	0.000209579	605.3	486	618	1305.9	1103.8	1066.8
													SVE_1714500	Alpha tubulin-like protein	1.41274	5.82409	7.73579e-09	8.33249e-08	654.2	798	567.5	1668.9	1959.5	1751.8
													SVE_0091400	ATP-dependent DNA helicase Q5	1.3253	6.11649	1.13403e-08	1.18875e-07	941.3	896.7	745.6	2284.6	2124.7	2065.4
													SVE_1881000	DNA recombination and repair protein Rad51, C-terminal domain and DNA recombination and repair protein RecA-like, ATP-binding domain and P-loop containing nucleoside triphosphate hydrolase domain-containing protein	1.47921	4.90785	5.98159e-06	4.00823e-05	347.6	203.4	485.6	761.6	1110	1018.6
													SVE_0787400	Tudor domain-containing protein	1.17872	7.00976	8.70793e-07	6.87838e-06	2067.5	1624.3	1461.3	3836.8	3759.4	4069.8
													SVE_1915000	Hypothetical protein	1.2572	3.52934	0.00022313	0.00102219	143	176.6	126.3	216.2	419.8	432.6
													SVE_0827400	Polybromo	1.28095	7.90444	1.9898e-08	2.02607e-07	2974.7	2967.9	3172.9	7320.4	7095.9	7735.2
													SVE_1912700	Hypothetical protein	1.42362	5.7952	4.01471e-07	3.38309e-06	731.5	588.7	649.3	1148.4	1897.9	2240.3
													SVE_1885800	Hypothetical protein	2.3501	5.67716	1.31843e-18	3.543e-17	374.2	455.5	266.9	1843.9	1888.9	1862.8
													SVE_1847300	Zinc finger, RING-type domain and Zinc finger, RING/FYVE/PHD-type domain-containing protein	1.73399	3.92473	5.38516e-09	5.96487e-08	165.7	151.5	142.9	381.4	569.8	582.5
													SVE_0681100	Aminotransferase, class I/classII domain and Pyridoxal phosphate-dependent transferase, major region, subdomain 1 and Pyridoxal phosphate-dependent transferase, major region, subdomain 2 and Pyridoxal phosphate-dependent transferase domain-containing protein	1.21879	7.96123	1.56072e-06	1.16347e-05	3761.6	3545.1	2466.6	8777.5	6856.9	7112.5
													SVE_1626700	RNA exonuclease 4	1.5504	4.97431	2.2782e-07	1.99725e-06	388	385.9	272	688.2	1093.7	1285.4
													SVE_0696700	Eukaryotic translation initiation factor 3 subunit K	1.02633	5.57749	0.000383557	0.001631	615.2	838.8	598.3	903.2	1654.1	1626.7
													SVE_1007400	Homeobox protein onecut	1.13089	6.44902	3.0382e-05	0.000171172	1360.6	1445.7	768.1	2328.9	2974.7	2526.5
													SVE_0312600	SANT associated domain-containing protein	1.14108	6.47356	6.05714e-07	4.95988e-06	1356.5	1191.4	1070.3	2400.2	2840.5	2741.2
													SVE_1836500	Inhibitor of growth protein 3	1.01841	6.52405	1.14805e-05	7.14792e-05	1399.2	1236.9	1332.9	2199.3	2915.2	2928.6
													SVE_0360800	Alpha tubulin-like protein	1.10834	6.53784	4.08342e-06	2.83843e-05	1107.8	1421.9	1312.2	2258.8	2775.4	3252.5
													SVE_0506000	Ribosome biogenesis methyltransferase WBSCR22	1.18674	5.74932	1.303e-06	9.79755e-06	657.5	764.8	720.8	1293.1	1841.4	1747.6
													SVE_0355900	Helicase, C-terminal domain and Helicase-associated domain and DNA/RNA helicase, DEAD/DEAH box type, N-terminal domain and Domain of unknown function DUF1605 domain and Helicase, superfamily 1/2, ATP-binding domain and P-loop containing nucleoside triphosphate hydrolase domain-containing protein	1.16538	8.05966	2.61472e-06	1.87588e-05	4256.4	3766.2	2713.3	8225.6	7578.5	8276.6
													SVE_0283500	Serine/threonine-protein kinase polo	2.21137	6.29969	2.11563e-15	4.53266e-14	829.5	498.2	500.2	2311.7	3003.2	3152.6
													SVE_1586300	Armadillo-type fold domain-containing protein	1.07906	7.92243	9.17064e-06	5.82658e-05	4140.6	3144.4	2885.1	6696.1	7194.8	7596.6
													SVE_1076100	Astacin-like metalloendopeptidase	10.3304	5.13548	6.91186e-101	5.5031e-98	1.4	0	2.3	1209.9	1621.2	1783.5
													SVE_1005600	U3 small nucleolar RNA-associated protein 18 homolog	2.03456	6.23866	6.44486e-12	1.01e-10	724.7	459.4	751.9	1771.7	3219.2	2943
													SVE_0156400	Histone H3 family and Histone core domain and Histone-fold domain-containing protein	1.02738	6.86637	1.95119e-05	0.000115945	1667.6	1795.2	1548	2752.4	3519.6	3945.2
													SVE_0872200	Hypothetical protein	1.09029	6.76246	8.53518e-06	5.47091e-05	1854.9	1282.4	1390.7	2776.1	3556.6	3309.9
													SVE_0810200	AAA+ ATPase domain and ATPase, AAA-type, core domain and P-loop containing nucleoside triphosphate hydrolase domain-containing protein	1.27287	6.9028	5.19318e-08	4.99517e-07	1538.2	1658.7	1374.2	3275.2	3738.5	4034.9
													SVE_0495100	Polycomb protein EED	1.84223	6.63039	2.36062e-15	5.02999e-14	945.2	809.8	1066.5	3454.4	3211.5	3450.3
													SVE_1053300	Homeobox domain and Homeodomain-like-containing protein	2.68695	5.70676	2.91935e-22	9.59216e-21	274.4	326.2	317.6	1396.8	2264	2257.5
													SVE_1041500	SET domain and Post-SET domain-containing protein	1.27466	6.83083	3.23233e-06	2.28315e-05	1814.7	1338.9	1191.7	2497.5	4113.5	3905.4
													SVE_0064400	Hypothetical protein	1.76372	3.91391	9.47489e-07	7.40937e-06	127.1	166.3	156.7	269.2	571.6	690.6
													SVE_1858500	E3 UFM1-protein ligase 1 family and COG complex component, COG2, C-terminal domain-containing protein	1.21177	6.96296	7.28244e-06	4.77758e-05	1820.5	1327.4	1762.1	2634.7	4341.8	4399.1
													SVE_0090500	Nuclear transcription factor Y subunit beta	1.4951	6.26928	1.39301e-09	1.68889e-08	829.2	906.7	901	1887.2	2715	2835.3
													SVE_1183600	Zinc finger, BED-type predicted domain-containing protein	1.04441	7.29946	1.95275e-05	0.000115949	2224.4	1862.4	2625.4	3917.9	4828.7	5099.3
													SVE_1091400	Hypothetical protein	1.08003	6.41036	0.00603579	0.0174556	1067.7	1678.7	819.6	1067.5	2588.3	3884.5
													SVE_1816300	GPI transamidase component PIG-T	1.11146	7.70795	4.61663e-06	3.18641e-05	2673.4	3530.5	2428.1	5903.2	6399.8	6350.1
													SVE_1102900	Cyclin-dependent kinase 1	1.61691	6.63711	7.99397e-11	1.13248e-09	1024.9	1081.7	1088.4	2404.6	3687.3	3712.1
													SVE_1725700	CDK-activating kinase assembly factor MAT1	1.33809	6.85584	1.10514e-08	1.16003e-07	1305.6	1589.1	1390.1	3222.2	3678.7	3934.7
													SVE_0010700	Putative cleavage and polyadenylation specificity factor subunit 4-like protein	1.29982	6.91177	6.8565e-08	6.45998e-07	1490.4	1467.7	1581.1	2972.8	4005.6	4200.6
													SVE_0082500	Probable ATP-dependent RNA helicase DDX47	1.39903	7.49777	1.96921e-09	2.33312e-08	2345.9	2101.4	2037.9	5162.2	6289	5654
													SVE_0072700	Hypothetical protein	1.25494	6.79759	8.76319e-07	6.89225e-06	1437.3	1354	1496	2472.7	3650.3	4112.6
													SVE_0401700	Probable ribosome biogenesis protein RLP24	1.74134	5.67931	3.62849e-11	5.3037e-10	488.5	596.7	456	1305	1838.1	2014.9
													SVE_0636700	Dreadlocks	1.69132	6.51273	9.17658e-12	1.41261e-10	1063.4	866.8	888.7	2369	3134.4	3604.2
													SVE_0197700	Hypothetical protein	1.20213	7.71945	1.91287e-06	1.398e-05	2722.6	3453.1	2156.3	5771.5	6812.9	6588.9
													SVE_1738200	Lethal (2) 09851	1.21945	7.92073	0.00127724	0.00458377	3571.4	4651.4	1277.6	5574.9	8389	8159.6
													SVE_0401200	Hypothetical protein	2.23507	8.08124	6.7143e-16	1.49589e-14	2683.8	1776.7	1733.1	7566.8	10272.8	11321.5
													SVE_0336400	Fanconi anemia group J protein	1.50666	8.68428	1.29015e-09	1.57466e-08	5179.7	5217.5	3576.4	13657.8	13424.4	12626
													SVE_1830000	Cyclin, C-terminal domain and Cyclin, N-terminal domain and Cyclin-like domain and Cyclin A/B/D/E/F family-containing protein	1.53621	7.6053	9.33313e-11	1.31505e-09	2313.8	2292.2	1909.8	5594.3	6885.6	6421.2
													SVE_0312500	Restin homolog	1.26699	9.37938	1.22106e-07	1.1142e-06	9758.1	8173.4	7578.3	17638.3	21653.1	22103.2
													SVE_1824900	Inversin	1.05167	8.9972	2.14587e-05	0.000125604	8779	7044.4	5874.8	13474.2	15062.8	16443.7
													SVE_0718400	Hypothetical protein	1.44605	7.2945	1.03122e-07	9.52084e-07	2025.7	1828.9	1646.6	3363.9	5460.5	6168.4
													SVE_0281700	FI20177p1	1.57572	8.24256	2.65465e-10	3.53051e-09	3738.3	3268.9	2921.6	7826	11029.9	10744.2
													SVE_0034800	Polyribonucleotide nucleotidyltransferase 1, mitochondrial	1.2099	8.74244	5.58007e-07	4.60783e-06	6451.5	5176.8	5239.3	11027.6	14035.5	13957.7
													SVE_1676300	Hypothetical protein	1.2571	7.8488	2.36996e-06	1.70969e-05	3005.5	3625.2	2242.8	5569.5	7469.4	8173.8
													SVE_0383900	Septin-2	1.20527	8.51551	1.7582e-06	1.29586e-05	5746.2	4665.9	4032.8	9020.7	12249.3	12040.2
													SVE_1004100	Nonaspanin (TM9SF) family-containing protein	1.29228	8.65792	1.26875e-06	9.58611e-06	5493.8	6320.2	3466.9	11866.9	13324.9	12235.8
													SVE_0190300	H/ACA ribonucleoprotein complex subunit 4	1.54852	7.97112	3.95201e-09	4.48544e-08	3293.4	2584.9	2464.7	5961.7	9505.3	8941.5
													SVE_1216600	Protein kinase domain and Serine-threonine/tyrosine-protein kinase catalytic domain and Serine/threonine- /dual specificity protein kinase, catalytic domain and Protein kinase-like domain-containing protein	1.98334	7.8983	7.00652e-12	1.09363e-10	2377.4	2519.5	1388.8	6427.2	9385.9	9045.5
													SVE_0255200	Protein Wnt-4	1.20194	7.97215	7.44412e-05	0.000383738	3027.7	4594.8	2305.6	5285.5	9243.2	8314.6
													SVE_0476800	General vesicular transport factor p115	1.22477	9.24534	6.02387e-06	4.0331e-05	8967.6	5203.4	9559.8	17400.6	18115.1	19946.9
													SVE_1911400	Protein transport protein Sec61 subunit beta	1.37512	5.85751	2.05949e-06	1.49816e-05	795.6	727.3	583.9	1133.3	2138.5	2197
													SVE_0551900	Hypothetical protein	1.30446	8.49575	1.81326e-07	1.61868e-06	4304.3	5411.2	3859.1	9306.9	12000.8	12224.2
													SVE_1844200	Protein ERGIC-53	1.02142	8.81673	1.82456e-05	0.000109167	6756.5	6945.5	5716.2	11196.1	14101	14123.5
													SVE_1867800	Hypothetical protein	1.56528	8.63986	9.77047e-11	1.36927e-09	4760.5	4395.8	3990.7	10916.4	13480.3	14513.3
													SVE_0404100	Transcription elongation factor SPT5	1.32941	9.22095	6.74652e-07	5.49561e-06	7566.1	9509.1	5089.4	18087.6	19438.8	18175.9
													SVE_1856500	Lariat debranching enzyme	1.18488	8.52663	1.77624e-06	1.30547e-05	4891.1	4423.9	5385.6	8785.2	11572.7	13065.8
													SVE_1050700	Hypothetical protein	1.63181	7.67426	2.28416e-09	2.66998e-08	2341.8	2228	1934.1	4498	7461.5	8200.8
													SVE_1881100	Probable ATP-dependent RNA helicase DDX49	1.84878	8.17948	2.3287e-12	3.82573e-11	2822.8	3174.7	2224.3	7508.5	11471	10640.4
													SVE_0545500	26S proteasome non-ATPase regulatory subunit 7	1.16222	8.45592	3.23494e-06	2.28315e-05	4602.8	5247.1	4300.4	8101.5	11822.8	11748.4
													SVE_0148700	Hypothetical protein	1.29953	9.54593	1.10124e-06	8.44283e-06	9632.5	11719.1	6825.8	19160.3	26189.7	24011.7
													SVE_1644600	Hypothetical protein	1.1195	7.67772	0.00189856	0.0064579	2763.5	3579.1	2079.7	2743.9	7417.9	8139.9
													SVE_0386500	Zinc finger, RING-type domain and Zinc finger, RING/FYVE/PHD-type domain-containing protein	2.77138	7.61823	7.97062e-13	1.3699e-11	1466	1111.8	700.1	3538.9	9314	9531
													SVE_0601500	Nuclear RNA export factor 2	1.79776	9.05558	9.56407e-11	1.34516e-09	6063.1	5385.6	4062	12862.9	19079.6	21989.3
													SVE_0392900	Cation efflux protein family and Cation efflux protein transmembrane domain-containing protein	1.59091	8.36771	1.69219e-08	1.74347e-07	3733.4	4096.4	2913.6	7130.4	13092.1	12145.6
													SVE_1077900	Putative phospholipase B-like 2	1.3422	9.30153	1.12755e-06	8.61081e-06	10070.6	7509.7	5709.5	15227.4	21837.9	21986.3
													SVE_0793000	Aspartyl aminopeptidase	1.67687	8.69185	6.11641e-12	9.6238e-11	4214.4	4789.6	3852.7	11466.2	14847.2	14797.9
													SVE_0544400	Hypothetical protein	1.48546	9.23227	0.000118313	0.000580152	6538.2	8727.7	5387.8	7524.8	24378.5	25931
													SVE_0316600	Hypothetical protein	1.22843	9.35163	8.73741e-07	6.89225e-06	9530.5	7452.6	8516.1	15498.5	21234.1	23017.7
													SVE_0322100	Mitotic checkpoint protein BUB3	1.22695	8.65654	2.14451e-05	0.000125604	5081.9	3874.5	6806.2	8569.2	14130.5	14197.8
													SVE_1749500	Transcription initiation factor IIA subunit 1	1.04058	9.27753	2.6625e-05	0.000152087	10051.2	9259.2	7177.7	14976.8	19982.7	19531.4
													SVE_0024200	Fizzy/cell division cycle 20 related 1	2.47726	8.48434	2.62269e-22	8.65377e-21	2714.7	2351.6	2049.9	10996.3	14306.7	14327.6
													SVE_0364700	Spectrin beta chain, erythrocytic	1.38396	10.1193	6.35221e-07	5.19063e-06	17784.7	11529.6	10891.2	26682.7	37413.3	40836.1
													SVE_0478900	Nuclear cap-binding protein subunit 1	1.12623	10.0998	5.91357e-06	3.96945e-05	16820.5	14292.2	13872.7	25493.4	35068	37639.2
													SVE_0582900	Maternal protein pumilio	1.47331	8.95632	3.78857e-08	3.73131e-07	6538	6419.6	4205.7	12532.4	17829.9	17296.7
													SVE_1900700	Transmembrane protein 209	1.35859	9.50496	2.36698e-09	2.76265e-08	8947.5	8467.1	9184	21434	22676.4	24099.1
													SVE_1824400	Zinc finger, CCCH-type domain-containing protein	1.22638	8.87026	0.000164132	0.000781201	6836.5	5518.4	5929.5	7138.1	16402.8	19243.6
													SVE_0383800	Kinesin-like protein KIF2A	1.35008	9.6262	3.56531e-07	3.05041e-06	11466.1	9977.5	7609.6	18651.6	27938.4	27478
													SVE_0165200	MADF domain-containing protein	1.7658	9.00242	9.27646e-12	1.42519e-10	5133.8	5871.9	4202.3	13506.7	19582.2	18632.8
													SVE_0421000	Innexin family-containing protein	1.02739	9.50137	0.00035489	0.00152737	10590	13294.1	7240.5	15787	26850.9	20807.8
													SVE_0176900	Deoxyuridine 5'-triphosphate nucleotidohydrolase, mitochondrial	1.02148	8.6056	0.00419219	0.012756	5038.1	4119.7	7617.9	5609.6	12245.7	16201
													SVE_0252300	TB2/DP1/HVA22-related protein family-containing protein	1.20856	8.34226	1.24179e-05	7.69477e-05	4442.1	4202.9	4145.3	6193.9	11665.3	11704.2
													SVE_1197200	Actin-binding protein anillin	1.39264	10.457	1.94443e-07	1.72986e-06	20541.1	16587.2	13457.7	33592.6	47525.5	51702.8
													SVE_0232200	Peptidase C48, SUMO/Sentrin/Ubl1 family-containing protein	1.43362	9.80612	3.81029e-08	3.74722e-07	12445.4	10955	8160.2	22700.1	31531.2	31025.1
													SVE_1835000	Peptidase S1 domain and Peptidase S1A, chymotrypsin-type family and Trypsin-like cysteine/serine peptidase domain-containing protein	1.98191	8.50526	2.1677e-14	4.34652e-13	3150.6	3090.5	3338.8	9262.7	15061.6	13522.1
													SVE_0264900	Beta-centractin	1.32558	9.34037	6.65673e-07	5.42811e-06	8085.4	7235.9	8802.3	13724.9	22857	23883.3
													SVE_0995700	Elongation factor 1-beta	1.87627	7.77756	1.9789e-09	2.33761e-08	1970.1	2650.8	1510.5	4614.7	8807.7	9092.1
													SVE_0220000	Hypothetical protein	1.95134	10.3886	9.53438e-13	1.62792e-11	13895.6	13088.4	8953.9	35836.1	53986.5	49166.3
													SVE_1586600	Protein kinase domain and Serine/threonine- /dual specificity protein kinase, catalytic domain and Protein kinase-like domain-containing protein	2.29858	8.87485	1.59575e-14	3.24124e-13	3163.3	4080.9	3105.4	10415.3	20079.4	20429.2
													SVE_1596500	Hypothetical protein	2.87757	8.37184	4.64507e-09	5.21903e-08	1493.5	2751.5	935.2	4189.2	17439.3	16442.4
													SVE_0075200	RuvB-like 2	1.71154	9.99652	1.91279e-09	2.28019e-08	11803.3	8596.5	10780.1	22168.7	37876.8	42075.1
													SVE_0220600	Hypothetical protein	1.16216	10.6581	7.9863e-05	0.000407922	23641	21352.4	20121.2	28080.6	57162.1	60482.2
													SVE_1729900	Low-density lipoprotein (LDL) receptor class A repeat-containing protein	1.12315	11.0079	0.000440809	0.00183455	36450.4	24684.1	23406.9	34176	72884.9	77092.1
													SVE_0066800	Rac GTPase-activating protein 1	1.67143	10.4831	7.35621e-09	7.96753e-08	17564.2	15484	11575.5	31215.2	54897.3	56031.6
													SVE_1120100	Translation elongation factor EFG, V domain and Translation elongation factor EFTu/EF1A, domain 2 and Translation elongation factor EFG/EF2, domain IV and Translation protein, beta-barrel domain and Elongation factor G, III-V domain and Ribosomal protein S5 domain 2-type fold, subgroup and Ribosomal protein S5 domain 2-type fold and P-loop containing nucleoside triphosphate hydrolase domain-conta…	1.01524	11.4131	0.00162647	0.00566295	49851.5	45689.2	22232.2	55295.6	93563.9	89190
													SVE_1750000	Stress-induced-phosphoprotein 1	1.60263	9.87368	9.72462e-09	1.02759e-07	11399.2	10522.6	8402	20386.4	36462.5	35247.9
													SVE_0643400	Protein-tyrosine phosphatase, receptor/non-receptor type domain and Protein-tyrosine/Dual specificity phosphatase domain and Protein-tyrosine phosphatase, catalytic domain-containing protein	2.02983	10.7089	1.54569e-12	2.58276e-11	16821.3	13643.6	12497.5	38275.2	65193.2	71976
													SVE_1672400	Ribonucleoside-diphosphate reductase large subunit	1.31176	11.5392	4.43283e-07	3.70746e-06	43815.9	31970.4	35721.1	69921.2	100780	106112
													SVE_0434200	Spectrin beta chain, erythrocytic	1.48579	11.7865	6.03819e-07	4.95474e-06	52503.3	31001.6	37772.6	74329.5	128674	136663
													SVE_0718000	Protein quaking	2.76155	9.893	8.64613e-15	1.79344e-13	6917.3	5663.2	3365.3	20370.2	44367.6	43398.5
													SVE_1004500	Zinc finger, nanos-type domain-containing protein	1.13924	10.5817	6.03752e-05	0.000318794	22313.4	22656.2	17468	29006.2	51862.2	56663.7
													SVE_0642900	Leucine-rich repeat and Leucine-rich repeat, typical subtype and Leucine rich repeat 5-containing protein	1.47364	12.2599	5.06586e-06	3.45982e-05	61170.2	75904.1	32351.6	112278	181221	177036
													SVE_1890600	Protein-tyrosine phosphatase, receptor/non-receptor type domain and Protein-tyrosine/Dual specificity phosphatase domain and Protein-tyrosine phosphatase, catalytic domain-containing protein	2.84911	11.1574	1.97313e-15	4.2624e-14	13971.9	14563.9	7786.7	47947.2	102636	111145
													SVE_0417100	Protein transport protein Sec61 subunit alpha-like 1	1.90528	11.5704	7.57965e-12	1.17605e-10	32782.9	28888.6	21941.6	74427.7	118653	120122
													SVE_0566500	Low-density lipoprotein (LDL) receptor class A repeat-containing protein	3.16011	14.4099	2.04128e-17	5.11629e-16	127244	102632	55889.7	491639	1.01546e+06	1.04735e+06
