# Supplementary material for: Small non-coding RNAs have predicted roles in reproductive biology and transposable element regulation in the parasitic worm Strongyloides venezuelensis
Source: Research Square preprint supplement (doi:10.21203/rs.3.rs-5828314/v1), 2025-04-23
Supplement: Supplementary file 8 [file 9b32c63ac1b9b4fd7c678910.xlsx]

## Sheet: Sheet1
SI Table X10 -egg targets, GO terms and protein descriptions Table showing the numbers and % of sRNAs a) targeting genes, 3’UTR, 5’UTR, TEs, tRNAs or rRNAs. Top rows indicate map frequency with majority of reads mapping once (1x) and some mapping more than once (>1x) and bottom row indicates proportion of reads. b) Genes and protein descriptions of upregulated sRNAs. Gene enriched GO terms for bi…
a) targets
		1x	>1x		1x	>1x		1x	>1x		1x	>1x		1x	>1x		1x	>1x
sRNA class	Reads	Gene			3'UTR			5'UTR			TE			tRNA			rRNA
eggs vs PF	352	17	4		105	23		4	0		7	52		0	0		0	0
egg vs FL	1831	43	32		565	119		37	0		33	321		0	0		0	0
%		1x	>1x	Tot	1x	>1x	Tot	1x	>1x	Tot	1x	>1x	Tot	1x	>1x	Tot	1x	>1x	Tot
sRNA class	Reads	Gene			3'UTR			5'UTR			TE			tRNA			rRNA
eggs vs PF	352	4.82955	1.13636	5.96591	29.8295	6.53409	36.3636	1.13636	0	1.13636	1.98864	14.7727	16.7614	0	0	0	0	0	0
egg vs FL	1831	2.34844	1.74768	4.09612	30.8575	6.49918	37.3566	2.02075	0	2.02075	1.80229	17.5314	19.3337	0	0	0	0	0	0
b) GO terms
eggs vs PF GO terms to 3'UTR						eggs GO terms to 3UTR						eggs vs PF			eggs vs FL
GO.ID	Term	Annotated	Significant	Expected	Fis	GO.ID	Term	Annotated	Significant	Expected	Fis	Gene	Protein Description		Gene	Protein Description
GO:0019773	proteasome core complex, alpha-subunit c...	14	1	0	0.003							SVE_0331400	WD40 repeat and WD40/YVTN repeat-like-containing domain and WD40-repeat-containing domain-containing protein		SVE_1331700	Nicotinic acetylcholine receptor beta 3 (Dbeta3) subunit
GO:0005839	proteasome core complex	35	1	0.01	0.0074							SVE_1331700	Nicotinic acetylcholine receptor beta 3 (Dbeta3) subunit		SVE_1640800	Atrial natriuretic peptide receptor 1
												SVE_1763800	Hypothetical protein SRAE_2000363400		SVE_0547100	Hypothetical protein SRAE_2000195700
eggs vs PF GO terms to Gene						eggs vs PF GO terms to Gene						SVE_0934900	---NA---		SVE_1763800	Hypothetical protein SRAE_2000363400
GO.ID	Term	Annotated	Significant	Expected	Fis	GO.ID	Term	Annotated	Significant	Expected	Fis	SVE_2013700	unnamed protein product		SVE_2001600	PREDICTED: uncharacterized protein LOC108359141
GO:0036065	fucosylation	26	1	0.01	0.0053	GO:0032008	positive regulation of TOR signaling	12	1	0	0.0049	SVE_0448400	---NA---		SVE_1651700	Zinc finger, RING-type domain and Zinc finger, C2H2 domain and Zinc finger, RING/FYVE/PHD-type domain and Zinc finger C2H2-type/integrase DNA-binding domain and Zinc finger, C2H2-like domain and Zinc finger, C3HC4 RING-type domain-containing protein
GO:0000413	protein peptidyl-prolyl isomerization	39	1	0.01	0.008	GO:0032006	regulation of TOR signaling	17	1	0.01	0.007	SVE_1995600	unnamed protein product		SVE_0934900	---NA---
GO:0018208	peptidyl-proline modification	44	1	0.01	0.009	GO:0031929	TOR signaling	20	1	0.01	0.0082	SVE_1040200	unnamed protein product		SVE_2013700	unnamed protein product
GO:0000152	nuclear ubiquitin ligase complex	12	1	0	0.0038	GO:0031932	TORC2 complex	2	1	0	0.0013	SVE_0934900	---NA---		SVE_2007400	hypothetical protein L596_026066
GO:0005680	anaphase-promoting complex	12	1	0	0.0038	GO:0031931	TORC1 complex	4	1	0	0.0025				SVE_0448400	---NA---
GO:0031461	cullin-RING ubiquitin ligase complex	24	1	0.01	0.0076	GO:0038201	TOR complex	4	1	0	0.0025				SVE_1089400	BMA-NRF-5
GO:0032580	Golgi cisterna membrane	27	1	0.01	0.0086	GO:0000152	nuclear ubiquitin ligase complex	12	1	0.01	0.0076				SVE_1124500	hypothetical protein Bm1_53495, partial
GO:0008417	fucosyltransferase activity	26	1	0	0.0044	GO:0005680	anaphase-promoting complex	12	1	0.01	0.0076				SVE_1995600	unnamed protein product
GO:0003755	peptidyl-prolyl cis-trans isomerase acti...	40	1	0.01	0.0068										SVE_1040200	unnamed protein product
GO:0016859	cis-trans isomerase activity	40	1	0.01	0.0068										SVE_2017000	Hypothetical protein CBG04902
															SVE_0347000	ShKT domain-containing protein
															SVE_0934900	---NA---
															SVE_1156300	unnamed protein product
															SVE_1642300	Nematode cuticle collagen, N-terminal domain-containing protein
															SVE_1924400	Probable Rho GTPase-activating protein CG5521
