# Supplementary material for: Small non-coding RNAs have predicted roles in reproductive biology and transposable element regulation in the parasitic worm Strongyloides venezuelensis
Source: Research Square preprint supplement (doi:10.21203/rs.3.rs-5828314/v1), 2025-04-23
Supplement: Supplementary file 9 [file a99f7dc0acbed2bfcd820e33.xlsx]

## Sheet: Sheet1
	SI Table X11 - miRNAs upregulated in five life cycle stages miRNAs significantly upregulated in eggs, free-living females, parasitic females, ‘activated’ iL3s and iL3s vs other life cycle stages with a seed regions. Seed regions expressed more than once highlighted in yellow.
	miRNA in parasitic females	Seed (2-8)	logFC	logCPM			miRNA in free-living females	Seed (2-8)	logFC	logCPM			miRNA in activated iL3s	Seed (2-8)	logFC	logCPM			miRNA in iL3s	Seed (2-8)	logFC	logCPM			miRNA in eggs	Seed (2-8)	logFC	logCPM
vs FL	TTTGCTTATGTTTCCACGATCAA	TTGCTTA	4.34731	6.63625		vs PF						vs egg	TGAAAGACGTTCTATATCTCT	GAAAGAC	6.14092	8.00021		vs PF	TAAGGCACAATATTGGCATCTCT	AAGGCAC	-4.7792	9.32384		vs PF	TAAGGCACAATATTGGCATCTCT	AAGGCAC	-3.88927	9.21304
													TGGCAGTGTAGTTAGCTGGTTG	GGCAGTG	5.71059	10.4288			TTATTGCTTGAGAATACTGAT	TATTGCT	-5.94989	6.24543			TCACCGGGATATCAGATGCTCA	CACCGGG	-4.57917	10.0004
vs piL3	TAAATATGAATGTGAATGTTAT	AAATATG	-7.27578	9.07063		vs piL3	TAAATATGAATGTGAATGTTAT	AAATATG	-6.26834	8.28666									TTTGGCACCATGGGACTCTAAT	TTGGCAC	-5.15801	9.31652			TCACCGGGTGAACGAATTCTC	CACCGGG	-6.96515	10.1917
	TAAATGCATCTTTTGAGATAGA	AAATGCA	-5.13453	5.71317			TAAATGCATCTTTTGAGATAGA	AAATGCA	-6.39588	7.13014									TTTGGCACTTAGGAATTCCACT	TTGGCAC	-4.70769	6.73625
	TAACCGGATATATTTGACTACA	AACCGGA	-5.04027	12.2579			TAAGCTCGTAGCTACAGGTTT	AAGCTCG	-6.0086	10.0697														vs FL	TCACCGGGTGAACGAATTCTC	CACCGGG	-5.34688	9.97627
	AAACTGAATTGATTCCTTACA	AACTGAA	-5.12508	3.43624			TAAGTGAATGCTTTGCCACAGTCT	AAGTGAA	-4.82335	7.57358								vs FL	AATGGCACCTTTGAACGTGTGC	ATGGCAC	4.00944	11.481			TCACCGGGATATCAGATGCTCA	CACCGGG	-3.48705	9.86051
	TAAGCTCGTAGCTACAGGTTT	AAGCTCG	-5.12711	9.02552			TAATACTGCCTTAGACGGCTAA	AATACTG	-6.69022	8.71427									TATTGCACACGTCCCGGCCTGA	ATTGCAC	4.3986	11.4049
	TAAGGCATTTTGAGGTTGTTC	AAGGCAT	-3.73696	8.2375			TAATACTGTCAGGTAATGACGCT	AATACTG	-5.05315	10.4891									TGGCAGTGTGGTTAGCTGGTTG	GGCAGTG	5.27271	14.9617		vs piL3	TAAGGCACAATATTGGCATCTCT	AAGGCAC	-7.043	9.82426
	TAATACTGTCAGGTAATGACGCT	AATACTG	-4.42045	9.71297			TACCCGTAGTCCAATGCTGTCA	ACCCGTA	-7.05388	15.9678									TGGCAGTGTAGTTAGCTGGTTG	GGCAGTG	5.71731	14.7375			TCACCGGGATATCAGATGCTCA	CACCGGG	-9.82465	10.6414
	TAATACTGCCTTAGACGGCTAA	AATACTG	-5.54374	7.38204			TACTGGCCTTCAAACTTCTTA	ACTGGCC	-7.7616	8.29753									TTTGGCACCATGGGACTCTAAT	TTGGCAC	4.07977	8.87014			TCACCGGGTGAACGAATTCTC	CACCGGG	-12.29	10.8439
	TACCCGTAATCCAATGCTGCA	ACCCGTA	-4.49424	11.7717			AATATCTGAATTGTTTACAAGAC	ATATCTG	-6.06625	6.57303															TCACCGGGTATACATTCATCA	CACCGGG	-9.31127	10.1872
	TACCCGTAGTCCAATGCTGTCA	ACCCGTA	-6.35977	15.2903			TATTATGCAAAGTAGAGTGCA	ATTATGC	-9.45486	10.1857								vs piL3	TAAATATGAATGTGAATGTTAT	AAATATG	-6.19616	7.87722			TGAGATCATGTTAGACTCATAT	GAGATCA	-6.92789	8.97368
	TACTGGCCTTCAAACTTCTTA	ACTGGCC	-8.75413	9.15346			TATTATGCCTGACTACAGAGTCT	ATTATGC	-8.15767	9.05274									TAAATGCATCTTTTGAGATAGA	AAATGCA	-6.48027	6.89504			TATCACAGTTGATTTGAATTCGT	ATCACAG	-6.35398	7.20376
	AATATCTGAATTGTTTACAAGAC	ATATCTG	-5.47256	5.80099			AATTGCGAATATATCCAGGTAG	ATTGCGA	-5.51193	5.55137									TAAATGCATCTCACTAGCACAAA	AAATGCA	-6.21694	5.13211			TTCATTGTCCAGCGTTGAACCGA	TCATTGT	-5.74845	7.14168
	TATCACAGTTGATTTGAATTCGT	ATCACAG	-5.41968	5.88626			TATTGGGCTAGAATGTATTTAC	ATTGGGC	-7.87469	4.27476									TAAGCTCGTAGCTACAGGTTT	AAGCTCG	-6.81155	10.5533			TTCACCGGGTAGACAAACGCGCG	TCACCGG	-6.65431	8.94494
	TATGGCACGTACACCATCTTCA	ATGGCAC	-5.75201	5.25975			TCACCGAAGTCATGAAGTTTAA	CACCGAA	-6.36958	8.49367									TAAGGCACAATATTGGCATCTCT	AAGGCAC	-7.59353	9.77765			TTTGGCACTGTATAGGCTCCA	TTGGCAC	-4.61653	7.70427
	TATTATGCAAAGTAGAGTGCA	ATTATGC	-6.55344	7.13845			TCACCGAATCCACGATGTCTTA	CACCGAA	-4.24577	9.88945									TAAGGCATTTTGAGGTTGTTC	AAGGCAT	-4.43648	8.74426			TCTGGGATTGTTTATCTTGGTA	CTGGGAT	-4.45213	6.68044
	TATTATGCCTGACTACAGAGTCT	ATTATGC	-6.03626	6.76721			TCACCGGGATATCAGATGCTCA	CACCGGG	-6.56561	7.13686									TAAGTGAATGCTTTGCCACAGTCT	AAGTGAA	-5.09339	7.51807			TTTGCAACGTAACTGGGCTTA	TTGCAAC	-4.52638	7.19546
	TATTGCACACGTCCCGGCCTGA	ATTGCAC	-4.07863	10.9732			TCACCGGGTGAACGAATTCTC	CACCGGG	-7.17358	5.54258									TACCCGTAGTCCAATGCTGTCA	ACCCGTA	-8.44203	17.1412
	TATTGGGCTAGAATGTATTTAC	ATTGGGC	-7.34914	3.7584			TCACCGGGTATACATTCATCA	CACCGGG	-9.22121	9.82389									TACCCGTAATCCAATGCTGCA	ACCCGTA	-4.15828	11.3194		vs iL3	TCACCGGGTATACATTCATCA	CACCGGG	-5.27716	9.47224
	TCACCGAAGTCATGAAGTTTAA	CACCGAA	-4.5352	6.52823			TCGAATCGTCTAGAAGTTAATTT	CGAATCG	-7.15434	10.2906									TACTGGCCTTCAAACTTCTTA	ACTGGCC	-4.21556	4.53419			TCACCGGGTGAACGAATTCTC	CACCGGG	-6.50343	10.1071
	TCACCGGGTATACATTCATCA	CACCGGG	-5.30538	5.86924			TCTGGGATTGTTTATCTTGGTA	CTGGGAT	-6.50293	8.39106									AATATCTGAATTGTTTACAAGAC	ATATCTG	-5.81033	5.99779			TCACCGGGATATCAGATGCTCA	CACCGGG	-7.44218	9.86821
	TCACCGGGATATCAGATGCTCA	CACCGGG	-5.0024	5.4906			TCTTTGGTTGTTTAGCTGTATG	CTTTGGT	-4.65971	10.6761									TATCACAGTTGATTTGAATTCGT	ATCACAG	-6.36161	6.65241
	TCGAATCGTCTAGAAGTTAATTT	CGAATCG	-6.00283	9.13631			TGACTAGAACATTACTTTGAA	GACTAGA	-10.5453	12.1355									AATGGCACCTTTGAACGTGTGC	ATGGCAC	-4.73518	12.4542
	TCTGGGATTGTTTATCTTGGTA	CTGGGAT	-6.73453	8.46041			TGAGACTATAGAGATTCATTA	GAGACTA	-8.01837	4.40845									TATGGCACGTACACCATCTTCA	ATGGCAC	-5.58936	4.93963
	TGAAAGACAAATTATATCTTT	GAAAGAC	-5.68153	3.98055			TGAGATCAAATTAGACTTATCG	GAGATCA	-8.79028	14.2661									TATTATGCAAAGTAGAGTGCA	ATTATGC	-5.32928	5.79418
	TGAAAGACATGGGTAGTGAGACG	GAAAGAC	-4.10926	15.4392			TGAGATCATGTTAGACTCATAT	GAGATCA	-8.21658	9.97246									TATTATGCCTGACTACAGAGTCT	ATTATGC	-4.82463	5.44829
	TGACTAGAACATTACTTTGAA	GACTAGA	-7.37584	8.83129			TGAGATCATTATGAAATCACG	GAGATCA	-7.22476	8.9112									TATTGCACACGTCCCGGCCTGA	ATTGCAC	-5.78274	12.4757
	TGAGATCAAATTAGACTTATCG	GAGATCA	-7.60018	12.917			TGAGATCATGCCAGTGTCATTT	GAGATCA	-7.49029	11.4996									TCACCGAAGTCATGAAGTTTAA	CACCGAA	-4.98774	6.82773
	TGAGATCATTATGAAATCACG	GAGATCA	-6.36397	7.89339			TGAGATCATATTAGACCCATCT	GAGATCA	-6.91647	13.3534									TCACCGGGTGAACGAATTCTC	CACCGGG	-5.67001	3.82054
	TGAGATCATGTTAGACTCATAT	GAGATCA	-6.75664	8.46004			TGAGGTAGTGTTAAATATTGTT	GAGGTAG	-8.64411	9.37608									TCCCTGAGACTCTACTTGTGA	CCCTGAG	-5.4857	12.9036
	TGAGGTAGTGTTAAATATTGTT	GAGGTAG	-6.25123	6.85613			CGGTGAAGAAGAGAATCTGACT	GGTGAAG	-8.04159	9.68912									TCTGGGATTGTTTATCTTGGTA	CTGGGAT	-7.01566	8.59133
	CGCCTTCATCCGTGACTTTAGA	GCCTTCA	-3.44772	6.40948			TGTCATGGAGTAGTTCTCTTAAG	GTCATGG	-9.30694	5.62517									TGAAAGACATGGGTAGTGAGACG	GAAAGAC	-4.51853	15.6875
	AGGCAAGATGTTGGCATAGCTGA	GGCAAGA	-6.00699	12.3668			TTAAAGCTTAGATTAAACGTCT	TAAAGCT	-9.28058	14.172									TGACTAGAACATTACTTTGAA	GACTAGA	-6.54686	7.8607
	TGGCAGTGTGATTAGCTGGTTG	GGCAGTG	-6.07602	11.7809			TTATTGCTTGAGAATACTGAT	TATTGCT	-6.56485	6.17668									TGAGATCATGTTAGACTCATAT	GAGATCA	-8.62833	10.1351
	CGGTGAAGAAGAGAATCTGACT	GGTGAAG	-5.98656	7.56578			TTCACCGGGTAGACAAACGCGCG	TCACCGG	-5.44535	7.4748									TGAGATCATTATGAAATCACG	GAGATCA	-5.28367	6.68708
	TTAAAGCTTAGATTAAACGTCT	TAAAGCT	-8.74473	13.4752			TTCGTTGTTACTGAAACTCGTC	TCGTTGT	-5.71088	8.96262									TGAGATCATATTAGACCCATCT	GAGATCA	-7.62679	13.8706
	TTAAGTAGTAGTGCCGCAGGTTG	TAAGTAG	-5.47081	9.85397			GTGAGCAAGAGCTTCCGGTGTG	TGAGCAA	-4.72676	7.77665									TGAGATCATGCCAGTGTCATTT	GAGATCA	-6.01917	9.69034
	ATAGGAAATGAATAAGGAGAGA	TAGGAAA	-4.88958	13.7761			TTGCACGATTTACATACTCACA	TGCACGA	-6.34075	11.5015									TGAGATCAAATTAGACTTATCG	GAGATCA	-6.02592	11.2163
	TTCACCGGGTAGACAAACGCGCG	TCACCGG	-4.83119	6.76181			ATGGGCCTATTTGTATCTCGTG	TGGGCCT	-9.96055	9.60014									CGCCTTCATCCGTGACTTTAGA	GCCTTCA	-5.06031	7.7785
	TTCATTGTCCAGCGTTGAACCGA	TCATTGT	-6.04637	7.01178			TTGTGACCGTTATAACGACTATT	TGTGACC	-6.7191	7.81936									TGGCAGTGTGATTAGCTGGTTG	GGCAGTG	-8.80854	14.2788
	TTCGTTGTTACTGAAACTCGTC	TCGTTGT	-4.03049	7.21476			TTTACGACCTTATCCGTGTCACT	TTACGAC	-6.20588	5.86039									TGGCAGTGTAGTTAGCTGGTTG	GGCAGTG	-5.69442	15.5399
	GTGAGCAAGAGCTTCCGGTGTG	TGAGCAA	-5.14325	8.17261			TTTACGCTTTTTAGTTAACA	TTACGCT	-9.2412	5.56339									TGGCAGTGTGGTTAGCTGGTTG	GGCAGTG	-6.74055	15.7418
	TTGCACGATTTACATACTCACA	TGCACGA	-6.212	11.2437			TTTGCAACGTAACTGGGCTTA	TTGCAAC	-6.78617	9.12415									CGGTGAAGAAGAGAATCTGACT	GGTGAAG	-4.38748	5.83022
	ATGGGCCTATTTGTATCTCGTG	TGGGCCT	-7.29409	6.84504			TTTGCAACTTCATCCATTGCACA	TTGCAAC	-6.47183	6.08445									TGTCATGGAGTAGTTCTCTTAAG	GTCATGG	-8.06918	4.31997
	TTGTGACCGTTATAACGACTATT	TGTGACC	-5.87531	6.84947			TTTGCGACCAAATCCAGGCCACG	TTGCGAC	-6.83213	13.8141									TTAAAGCTTAGATTAAACGTCT	TAAAGCT	-7.43848	12.0338
	TTTACGACCTTATCCGTGTCACT	TTACGAC	-6.16075	5.6578			TTTGCGACATACTCAGATCAG	TTGCGAC	-5.63819	10.1519									TTAAGTAGTTGTGCCGTAGGTCG	TAAGTAG	-5.06514	8.94773
	TTTACGCTTTTTAGTTAACA	TTACGCT	-7.77687	4.16902			TTTGCGACCTCTATCAGACCTC	TTGCGAC	-5.28853	10.506									TTAAGTAGTAGTGCCGCAGGTTG	TAAGTAG	-4.64855	8.92047
	TTTGAGACTAACGTTAGGGCTA	TTGAGAC	-6.12213	11.2743			TTTGCGACCTATCCAAGATCA	TTGCGAC	-5.71777	5.71958									TTATTGCTTGAGAATACTGAT	TATTGCT	-7.48391	6.77823
	TTTGCAACTTCATCCATTGCACA	TTGCAAC	-6.52529	5.96081			TTTGCGACCAAACCAGATCAA	TTGCGAC	-4.66222	6.50859									TTCACCGGGTAGACAAACGCGCG	TCACCGG	-5.30467	7.05956
	TTTGCAACGTAACTGGGCTTA	TTGCAAC	-3.57667	5.86313			TTTGCGACTGTATCCAAACTACG	TTGCGAC	-5.9153	13.2577									TTCATTGTCCAGCGTTGAACCGA	TCATTGT	-6.30089	7.10466
	TTTGCACCTTATTCAATCACC	TTGCACC	-6.24006	8.9589			TTTGCGACTGTATCCACATCACT	TTGCGAC	-5.46376	13.3886									TTCGTTGTTACTGAAACTCGTC	TCGTTGT	-5.25778	8.233
	TTTGCACTTAGATACCTGACTAC	TTGCACT	-4.25312	10.335			TTTGGGAACATGTCCAGAACCTT	TTGGGAA	-4.7187	10.0225									GTGAGCAAGAGCTTCCGGTGTG	TGAGCAA	-6.13429	8.93582
	TTTGCGACTAAACCTAGATCA	TTGCGAC	-8.6954	10.5653			TTTGGGATCGAATTAACCAAT	TTGGGAT	-7.97942	8.67207									TTGCACGATTTACATACTCACA	TGCACGA	-4.59613	9.51291
	TTTGCGACCTATCCAAGATCA	TTGCGAC	-7.50892	7.29881			TTTTGTATTGCTGAATTTTTGCT	TTTGTAT	-6.07072	10.8699									ATGGGCCTATTTGTATCTCGTG	TGGGCCT	-6.727	6.11723
	TTTGCGACCAAACTTAGATCA	TTGCGAC	-5.97294	10.4067															TTGTGACCGTTATAACGACTATT	TGTGACC	-4.83458	5.66916
	TTTGCGACTGTATCCAAAACCCG	TTGCGAC	-5.57522	14.0793		vs iL3	TAAATGCATCTTTTGAGATAGA	AAATGCA	5.19638	6.9099									TTTACGACCTTATCCGTGTCACT	TTACGAC	-5.93312	5.27695
	TTTGCGACTGTATCCACATCACT	TTGCGAC	-6.70977	14.6181			TAAGTGAATGCTTTGCCACAGTCT	AAGTGAA	4.1648	7.38762									TTTACGCTTTTTAGTTAACA	TTACGCT	-7.67883	3.95363
	TTTGCGACCTCTATCAGACCTC	TTGCGAC	-6.09642	11.2942			TACCCGTAATCCAATGCTGCA	ACCCGTA	5.98969	11.0012									TTTGCACTTAGATACCTGACTAC	TTGCACT	-4.75066	10.6706
	TTTGCGACAGTTGTTGGCTTA	TTGCGAC	-6.23727	8.37044			TACTGGCCTTCAAACTTCTTA	ACTGGCC	11.7287	8.06806									TTTGCGACTAAACCTAGATCA	TTGCGAC	-8.53416	10.2688
	TTTGCGACCCAATCCAGGCTA	TTGCGAC	-4.7514	9.59282			TATTATGCAAAGTAGAGTGCA	ATTATGC	5.66635	9.94752									TTTGCGACCAAATCCAGGCCACG	TTGCGAC	-6.38911	13.1558
	TTTGCGACATACTCAGATCAG	TTGCGAC	-5.43962	9.8239			TATTATGCCTGACTACAGAGTCT	ATTATGC	4.28006	8.87519									TTTGCGACATACTCAGATCAG	TTGCGAC	-5.56842	9.80021
	TTTGCGACCAAACCAGATCAA	TTGCGAC	-5.44087	7.10361															TTTGCGACTGTATCCACATCACT	TTGCGAC	-5.9765	13.6823
	TTTGCGACCAAATCCAGGCCACG	TTGCGAC	-5.27692	12.2715		vs egg	AATTGCGAATATATCCAGGTAG	ATTGCGA	6.52013	5.28113									TTTGCGACCTATCCAAGATCA	TTGCGAC	-6.07337	5.73689
	TTTGCGACCTATTCATGATCA	TTGCGAC	-4.54764	7.69596			TATTGGGCTAGAATGTATTTAC	ATTGGGC	7.51749	4.03358									TTTGCGACCAAACCAGATCAA	TTGCGAC	-5.14105	6.66077
	TTTGCGACCATATCCAAAGCCCGT	TTGCGAC	-4.40402	9.73365			TCACCGAATCCACGATGTCTTA	CACCGAA	4.76883	9.60838									TTTGCGACAGTTGTTGGCTTA	TTGCGAC	-6.23035	8.25363
	TTTGCGACCTATATCCAGGCCACG	TTGCGAC	-4.95245	11.8878			TCCCTGAGACTCTACTTGTGA	CCCTGAG	8.60589	12.2616									TTTGCGACTAATCCAGGCCACA	TTGCGAC	-4.36173	11.4729
	TTTGCGACTAATCCAGGCCACA	TTGCGAC	-4.59756	11.8312			TCCCTGAGATTTCATATAACCGG	CCCTGAG	8.18691	10.478									TTTGCGACTGTATCCAAACTACG	TTGCGAC	-4.9825	12.042
	TTTGCGTACATATTTCTGAACCTC	TTGCGTA	-6.66217	10.571			TCGAATCGTCTAGAAGTTAATTT	CGAATCG	7.70632	9.99175									TTTGCGACCAAACTTAGATCA	TTGCGAC	-4.6351	8.96593
	TTTGCTTATGTTTCCACGATCAA	TTGCTTA	-8.13031	7.56042			TGAAAGACGTTCTATATCTCT	GAAAGAC	9.86771	11.3466									TTTGCGACCTCTATCAGACCTC	TTGCGAC	-5.99526	10.9868
	TTTGGCACTGTATAGGCTCCA	TTGGCAC	-7.10306	9.73484			TGACTAGAACATTACTTTGAA	GACTAGA	5.53988	11.8133									TTTGCGACCCAATCCAGGCTA	TTGCGAC	-3.81783	8.58013
	TTTGGGAACATGTCCAGAACCTT	TTGGGAA	-5.61095	10.7039			TGAGACTATAGAGATTCATTA	GAGACTA	7.75347	4.24261									TTTGCGTACATATTTCTGAACCTC	TTGCGTA	-5.98612	9.70561
	TTTGGGACCTGTGTTTAAGTTG	TTGGGAC	-4.87795	12.5824			TGAGATCATGCCAGTGTCATTT	GAGATCA	6.28379	11.2403									TTTGGCACCATGGGACTCTAAT	TTGGCAC	-6.17256	9.89485
	TTTGGGATCGAATTAACCAAT	TTGGGAT	-6.78936	7.30089			TGAGATCAAATTAGACTTATCG	GAGATCA	6.98651	13.8581									TTTGGCACTTAGGAATTCCACT	TTGGCAC	-5.6623	7.25825
	TTTTGTATTGCTGAATTTTTGCT	TTTGTAT	-5.92499	10.5794			TGAGATCATTATGAAATCACG	GAGATCA	6.93802	8.54614									TTTGGCACTGTATAGGCTCCA	TTGGCAC	-4.68483	7.19909
							TGAGGTAGTGTTAAATATTGTT	GAGGTAG	9.08726	9.28743									TTTGGGAACATGTCCAGAACCTT	TTGGGAA	-4.88249	9.87151
vs iL3	TACTGGCCTTCAAACTTCTTA	ACTGGCC	4.39914	8.38666			TGATATGTACAGTTATTCTG	GATATGT	4.80948	8.06967									TTTGGGATCGAATTAACCAAT	TTGGGAT	-6.42826	6.81568
	TTTGCTTATGTTTCCACGATCAA	TTGCTTA	5.00658	6.81006			TGGCAGTGTGGTTAGCTGGTTG	GGCAGTG	4.39162	10.5831									TTTTGTATTGCTGAATTTTTGCT	TTTGTAT	-5.83699	10.3468
							TTAAGTAGTAGTGCCGCAGGTTG	TAAGTAG	4.21132	6.78885
vs egg	TAAATATGAATGTGAATGTTAT	AAATATG	5.84423	8.9771			ATAGGAAATGAATAAGGAGAGA	TAGGAAA	6.78723	12.2602								vs egg	TAAATATGAATGTGAATGTTAT	AAATATG	4.57351	7.65987
	TAAATGCATCTTTTGAGATAGA	AAATGCA	4.19768	5.64154			TTATTGCTTGAGAATACTGAT	TATTGCT	6.04851	5.95887									TGGCAGTGTGATTAGCTGGTTG	GGCAGTG	9.55832	14.1002
	TAACCGGATATATTTGACTACA	AACCGGA	4.58738	12.1568			TTCGTTGTTACTGAAACTCGTC	TCGTTGT	6.7561	8.71536									TGGCAGTGTGGTTAGCTGGTTG	GGCAGTG	9.8332	15.5657
	TAAGGCATTTTGAGGTTGTTC	AAGGCAT	6.60394	8.03523			TTGCACGATTTACATACTCACA	TGCACGA	9.39478	11.3928									TGGCAGTGTAGTTAGCTGGTTG	GGCAGTG	11.448	15.3502
	TACCCGTAATCCAATGCTGCA	ACCCGTA	6.92025	11.6007			TTGTGACCGTTATAACGACTATT	TGTGACC	7.24008	7.56355									TTGCACGATTTACATACTCACA	TGCACGA	7.61351	9.22326
	TACTGGCCTTCAAACTTCTTA	ACTGGCC	12.5667	9.03387			TTTACGACCTTATCCGTGTCACT	TTACGAC	9.23745	5.62543									TTTGCGACAGTTGTTGGCTTA	TTGCGAC	8.14657	8.01064
	TATTGCACACGTCCCGGCCTGA	ATTGCAC	6.73667	10.7811			TTTACGCTTTTTAGTTAACA	TTACGCT	6.67685	5.29431									TTTGCGACCCAATCCAGGCTA	TTGCGAC	7.52223	8.26958
	TATTGGGCTAGAATGTATTTAC	ATTGGGC	7.1379	3.74928			TTTGCGACATACTCAGATCAG	TTGCGAC	7.16891	9.87085									TTAAGTAGTTGTGCCGTAGGTCG	TAAGTAG	7.86739	8.67398
	TCCCTGAGATTTCATATAACCGG	CCCTGAG	9.77882	11.7502			TTTGCGACCAAACCAGATCAA	TTGCGAC	5.45307	6.23697									TTTGCGACATACTCAGATCAG	TTGCGAC	7.23358	9.5301
	TCCCTGAGACTCTACTTGTGA	CCCTGAG	5.63587	8.99875			TTTGCGACCTCTATCAGACCTC	TTGCGAC	5.6588	10.2225									TTTGCGACTAAACCTAGATCA	TTGCGAC	6.47075	10.048
	TCGAATCGTCTAGAAGTTAATTT	CGAATCG	6.91926	8.89673			TTTGCGACCCAATCCAGGCTA	TTGCGAC	6.00936	7.17595									TTTGCGTACATATTTCTGAACCTC	TTGCGTA	6.69134	9.45499
	TGAAAGACGTTCTATATCTCT	GAAAGAC	10.1355	11.3008			TTTGCGACAGTTGTTGGCTTA	TTGCGAC	8.70193	8.88299									TTTGGGAACATGTCCAGAACCTT	TTGGGAA	6.51207	9.6019
	TGAAAGACATGGGTAGTGAGACG	GAAAGAC	5.61615	15.1343			TTTGCGACTGTATCCACATCACT	TTGCGAC	5.75824	13.29									TACCCGTAATCCAATGCTGCA	ACCCGTA	6.41743	11.0204
	TGAAAGACAAATTATATCTTT	GAAAGAC	7.3285	3.90893			TTTGGGAACATGTCCAGAACCTT	TTGGGAA	6.23489	9.73321									TTTTGTAT+B117:B178TGCTGAATTTTTGCT	TTTGTAT	7.04406	10.0641
	TGAGATCAAATTAGACTTATCG	GAGATCA	6.25404	12.8086			TTTGGGATCGAATTAACCAAT	TTGGGAT	6.2618	8.4113									TTCGTTGTTACTGAAACTCGTC	TCGTTGT	6.40842	7.97109
	TGAGATCATTATGAAATCACG	GAGATCA	6.50037	7.78189			TTTTGTATTGCTGAATTTTTGCT	TTTGTAT	7.18036	10.6068									TGAAAGACGTTCTATATCTCT	GAAAGAC	7.96709	9.05108
	TGAGGTAGTGTTAAATATTGTT	GAGGTAG	6.77386	6.74086															TTATTGCTTGAGAATACTGAT	TATTGCT	7.04024	6.55758
	TGATATGTACAGTTATTCTG	GATATGT	6.10749	9.02442															TCCCTGAGACTCTACTTGTGA	CCCTGAG	9.34792	12.587
	TGATATGTCTGGTATTCTTGGGT	GATATGT	4.05067	14.4862															TATTGCACACGTCCCGGCCTGA	ATTGCAC	8.2656	12.2102
	AGGCAAGATGTTGGCATAGCTGA	GGCAAGA	3.89481	12.3145															TGAAAGACATGGGTAGTGAGACG	GAAAGAC	5.97761	15.4078
	TGGCAGTGTGATTAGCTGGTTG	GGCAGTG	7.11414	11.7487															TAAGGCATTTTGAGGTTGTTC	AAGGCAT	7.1017	8.43088
	TGGCAGTGTAGTTAGCTGGTTG	GGCAGTG	7.11786	11.1113															TTTGCGACTGTATCCACATCACT	TTGCGAC	6.32984	13.441
	TGGCAGTGTGGTTAGCTGGTTG	GGCAGTG	5.32861	11.181															TTAAGTAGTAGTGCCGCAGGTTG	TAAGTAG	6.60483	8.71985
	TTAAAGCTTAGATTAAACGTCT	TAAAGCT	6.85216	13.363															TTTGCGACCAAACCAGATCAA	TTGCGAC	6.05393	6.41872
	TTAAGTAGTAGTGCCGCAGGTTG	TAAGTAG	7.52645	9.71231															TGATATGTACAGTTATTCTG	GATATGT	5.45462	8.29751
	TTAAGTAGTTGTGCCGTAGGTCG	TAAGTAG	7.88395	8.74787															TTTGGCACCATGGGACTCTAAT	TTGGCAC	5.11253	9.6767
	ATAGGAAATGAATAAGGAGAGA	TAGGAAA	8.55793	13.6988															TGAGATCATGCCAGTGTCATTT	GAGATCA	4.89469	9.47634
	TTCGTTGTTACTGAAACTCGTC	TCGTTGT	5.463	7.13186															TTTGCGACCAAACTTAGATCA	TTGCGAC	6.89424	8.7573
	TTGCACGATTTACATACTCACA	TGCACGA	9.41953	11.1114															ATAGGAAATGAATAAGGAGAGA	TAGGAAA	7.28279	12.3456
	TTGTGACCGTTATAACGACTATT	TGTGACC	6.77016	6.80414															TTTACGACCTTATCCGTGTCACT	TTACGAC	8.60417	5.05692
	TTTACGACCTTATCCGTGTCACT	TTACGAC	9.05302	5.54191															TGAGATCATTATGAAATCACG	GAGATCA	5.23046	6.46223
	TTTACGCTTTTTAGTTAACA	TTACGCT	5.71775	4.17428															TCCCTGAGATTTCATATAACCGG	CCCTGAG	7.25045	9.13854
	TTTGAGACTAACGTTAGGGCTA	TTGAGAC	7.14174	11.1427															TGAGATCATATTAGACCCATCT	GAGATCA	4.3018	13.6948
	TTTGCAACTTCATCCATTGCACA	TTGCAAC	4.40904	5.92231															TAAATGCATCTTTTGAGATAGA	AAATGCA	5.36479	6.67045
	TTTGCACCTTATTCAATCACC	TTGCACC	7.61117	8.83808															TTGTGACCGTTATAACGACTATT	TGTGACC	5.46139	5.44332
	TTTGCACTTAGATACCTGACTAC	TTGCACT	5.73614	10.0367															TTTGCGACCTATCCAAGATCA	TTGCGAC	5.361	5.56658
	TTTGCGACCCAATCCAGGCTA	TTGCGAC	8.6009	9.42596															TTTGGGATCGAATTAACCAAT	TTGGGAT	4.85609	6.6348
	TTTGCGACAGTTGTTGGCTTA	TTGCGAC	8.28637	8.23967															TTTGCACTTAGATACCTGACTAC	TTGCACT	6.17833	10.3922
	TTTGCGACTAAACCTAGATCA	TTGCGAC	6.80003	10.4599															TACTGGCCTTCAAACTTCTTA	ACTGGCC	7.81418	4.30411
	TTTGCGACCAAACTTAGATCA	TTGCGAC	8.31871	10.2724															TTTGAGACTAACGTTAGGGCTA	TTGAGAC	5.62612	9.56793
	TTTGCGACTGTATCCAAAACCCG	TTGCGAC	5.78037	13.9528															CGCCTTCATCCGTGACTTTAGA	GCCTTCA	4.35454	7.56552
	TTTGCGACTGTATCCACATCACT	TTGCGAC	7.30055	14.4925															TTTGCGACCTATTCATGATCA	TTGCGAC	5.01276	6.86543
	TTTGCGACATACTCAGATCAG	TTGCGAC	7.172	9.55199															TTTGGCACTTAGGAATTCCACT	TTGGCAC	5.28578	7.04285
	TTTGCGACCTATCCAAGATCA	TTGCGAC	6.94851	7.18846															TTTGGGACCTGTGTTTAAGTTG	TTGGGAC	4.14078	10.9062
	TTTGCGACCTCTATCAGACCTC	TTGCGAC	6.92997	11.16															TAAGCTCGTAGCTACAGGTTT	AAGCTCG	4.00779	10.3859
	TTTGCGACCTATATCCAGGCCACG	TTGCGAC	7.02792	11.8359															TTTACGCTTTTTAGTTAACA	TTACGCT	5.47933	3.87613
	TTTGCGACCAAACCAGATCAA	TTGCGAC	6.61033	7.06178															GTGAGCAAGAGCTTCCGGTGTG	TGAGCAA	4.19492	8.76886
	TTTGCGACCTATTCATGATCA	TTGCGAC	5.51265	7.43132															TTTGCGACCTCTATCAGACCTC	TTGCGAC	6.53564	10.6936
	TTTGCGTACATATTTCTGAACCTC	TTGCGTA	7.60897	10.4493
	TTTGCTTATGTTTCCACGATCAA	TTGCTTA	7.77322	7.44868
	TTTGGGAACATGTCCAGAACCTT	TTGGGAA	7.39502	10.5618
	TTTGGGACCTGTGTTTAAGTTG	TTGGGAC	5.51174	12.3121
	TTTGGGATCGAATTAACCAAT	TTGGGAT	5.38259	7.22443
	TTTTGTATTGCTGAATTTTTGCT	TTTGTAT	7.34148	10.4452

## Sheet: Sheet2
Seed sequence							Stage	Count
2	3	4	5	6	7	8
T	T	G	C	G	A	C	exception Egg, piL3	35
G	A	G	A	T	C	A	exception piL3	13
C	A	C	C	G	G	G	exception piL3	9
G	G	C	A	G	T	G	exception Egg	8
A	C	C	C	G	T	A	exception Egg, piL3	6
A	T	T	A	T	G	C	exception Egg, piL3	6
G	A	A	A	G	A	C	exception Egg	6
T	A	A	G	T	A	G	exception Egg, piL3	5
T	T	G	G	C	A	C	exception FLF, piL3	5
A	A	A	T	G	C	A	exception Egg, piL3	4
A	A	T	A	C	T	G	only PF and FLF	4
C	A	C	C	G	A	A	exception Egg, piL3	4
C	C	C	T	G	A	G	exception Egg, piL3	4
C	T	G	G	G	A	T	exception piL3	4
T	C	A	C	C	G	G	exception piL3	4
T	T	G	C	A	A	C	exception iL3, piL3	4
A	A	A	T	A	T	G	exception Egg, piL3	3
A	A	G	C	T	C	G	exception Egg, piL3	3
A	C	T	G	G	C	C	exception Egg, piL3	3
A	T	A	T	C	T	G	exception Egg, piL3	3
A	T	C	A	C	A	G	only PF and Egg	3
A	T	G	G	C	A	C	only PF	3
G	A	T	A	T	G	T	only PF and FLF	3
G	G	T	G	A	A	G	exception Egg, piL3	3
T	A	A	A	G	C	T	exception Egg, piL3	3
T	C	A	T	T	G	T	only PF, iL3, Egg	3
T	C	G	T	T	G	T	exception Egg, piL3	3
T	G	A	G	C	A	A	exception Egg, piL3	3
T	G	C	A	C	G	A	exception Egg, piL3	3
T	G	G	G	C	C	T	exception Egg, piL3	3
T	G	T	G	A	C	C	exception Egg, piL3	3
T	T	A	C	G	A	C	exception Egg, piL3	3
T	T	A	C	G	C	T	exception Egg, piL3	3
T	T	G	G	G	A	A	exception Egg, piL3	3
T	T	G	G	G	A	T	exception Egg, piL3	3
T	T	T	G	T	A	T	exception Egg, piL3	3
A	A	G	G	C	A	T	only PF and iL3	2
A	T	T	G	C	A	C	only PF and iL3	2
A	T	T	G	G	G	C	only PF and FLF	2
C	G	A	A	T	C	G	only PF and FLF	2
G	A	C	T	A	G	A	only PF and iL3	2
G	A	G	G	T	A	G	only PF and FLF	2
G	C	C	T	T	C	A	only PF and iL3	2
T	A	G	G	A	A	A	only PF and FLF	2
T	T	G	C	A	C	T	only PF and iL3	2
T	T	G	C	G	T	A	only PF and iL3	2
A	A	G	T	G	A	A	only FLF and iL3	2
G	T	C	A	T	G	G	only FLF and iL3	2
A	A	G	G	C	A	C	only iL3 and Egg	2
A	A	C	C	G	G	A	only PF	1
A	A	C	T	G	A	A	only PF	1
G	G	C	A	A	G	A	only PF	1
T	T	G	A	G	A	C	only PF	1
T	T	G	C	A	C	C	only PF	1
T	T	G	C	T	T	A	only PF	1
T	T	G	G	G	A	C	only PF	1
C	T	T	T	G	G	T	only PF	1
G	A	G	A	C	T	A	only PF	1
T	A	T	T	G	C	T	only iL3	1
