# Supplementary material for: Small non-coding RNAs have predicted roles in reproductive biology and transposable element regulation in the parasitic worm Strongyloides venezuelensis
Source: Research Square preprint supplement (doi:10.21203/rs.3.rs-5828314/v1), 2025-04-23
Supplement: Supplementary file 10 [file c96c54aa5c08b8ec54aa0165.xlsx]

## Sheet: Sheet1
SI Table X2 - EdgeR analysis of differential expression between life cycle stages. sRNA upregulated in a) RppH-treated and b) Monophosphate libraries between parasitic females (PF), free-living females (FLF), free-living iL3s (iL3), activated iL3s (piL3) and eggs collected from parasitic females.
a)RppH-treated library
FLF vs Egg	logFC	logCPM	PValue	FDR		iL3 vs FLF	logFC	logCPM	PValue	FDR		activated iL3 vs FLF	logFC	logCPM	PValue	FDR		iL3 vs Egg	logFC	logCPM	PValue	FDR		activated iL3 vs iL3	logFC	logCPM	PValue	FDR		PF vs Egg	logFC	logCPM	PValue	FDR		PF vs FL	logFC	logCPM	PValue	FDR		PF vs iL3	logFC	logCPM	PValue	FDR		activated iL3 vs PF	logFC
AAGGGTTTCACGTCA	-10.8649	9.73888	3.28002e-19	1.56332e-14		TGGCAGTGTAGTTCGCTGGTTG	12.4218	7.49952	6.54858e-17	2.71439e-12		GAATTTGTTGAAACTCCTTGAAACA	-13.0256	8.29477	4.18162e-14	2.4925e-09		TGGCAGTGTGATTAGCTGGTTG	11.1271	14.3866	1.15089e-14	4.099e-10		GGGTTATTTTAAAACTTAGATTTGA	-12.2221	11.6195	3.85683e-15	1.77676e-10		TGAAAGACGTTCTATATCTCT	13.7316	11.8945	1.44614e-19	6.37471e-15		CATAAACACCACTCTGATCTA	10.7841	6.75313	2.08093e-20	1.0178e-15		GGTGAATTTAGGGACAGG	-11.2187	12.2255	1.76751e-21	7.1031e-17		TGAGATCAATGGGAATCTTCAAA	-9.95016
CCGCCCGTCGCTGCCC	-11.6366	8.3123	2.48921e-17	3.9547e-13		GGTGAATTTAGGGACAGA	9.62481	8.55226	1.45254e-16	3.01039e-12		GGGCTTGATTGTCGTTTTGGTACACT	-12.7811	8.0507	2.04339e-13	6.08991e-09		GGGTTATTTTAAAACTTAGATTTGA	12.3205	11.2884	3.43076e-13	6.10949e-09		GGTGAATTTAGGGACAGA	-12.085	10.6762	1.02171e-14	2.35341e-10		GTGCGGTGATTAAGAGAATTTCTGAGCTT	13.0921	9.24017	1.41465e-14	3.11795e-10		TATATCCATAAACACCACTCTG	12.3209	6.65831	4.59762e-20	1.12437e-15		GGTGAATTTAGGGACAGA	-13.1184	9.7683	3.27822e-18	6.58709e-14		TGAGATCAAATTAGACTTATCG	-8.06389
AGGGTTTCACGTCA	-10.8647	8.86939	2.31417e-17	3.9547e-13		TGGCAGTGTGATTCGCTGGTTG	9.91821	6.65118	8.58468e-15	1.18612e-10		GTAATTGTGGATTCATTTGAGGAAA	-12.5384	7.80869	3.09946e-13	6.15822e-09		GGTGAATTTAGGGACAGA	13.3016	10.3106	5.94918e-13	7.06286e-09		GGTGAATTTAGGGACAGG	-11.222	13.1164	4.96848e-13	7.62959e-09		TCCCTGAGATTTCATATAACCGG	9.47054	10.6892	5.66751e-14	8.32764e-10		TTTATGGGTATATCCCAATGG	10.1648	6.13204	1.03986e-18	1.69535e-14		TGAGATCAATGGGAATCTTCAAA	7.93691	9.0695	6.57879e-15	7.03409e-11		GTGCGGTGATTAAGAGAATTTCTGAGCTT	-8.43642
CTCCGGAGAGAG	-12.7395	7.53106	7.08266e-17	8.43935e-13		TGGCAGTGTAGTTGGCTGGTTG	8.68837	7.06707	4.90273e-14	5.08045e-10		GGATCTATTTTCTCGATCAGAAGGCT	-12.215	7.48629	9.04741e-13	1.07856e-08		TGGCAGTGTAGTTAGCTGGTTG	12.3164	15.1061	1.27299e-12	9.06777e-09		GGTGAATTTAGGGACAGGTCTTCTAAACTTGTTTTGAGCTAGTAACTCAT	-9.26664	9.51248	4.85124e-12	5.58717e-08		ATAGGAAATGAATAAGGAGAG	8.80273	9.67344	1.90098e-13	2.09493e-09		TCCATAAACACCACTCTGATC	11.6242	5.95934	3.30271e-18	2.43057e-14		GGTGAATTTAGGGACAGGTCTTCTAAACTTGTTTTGAGCTAGTAACTCAT	-11.9717	8.62246	7.00136e-15	7.03409e-11		TTTGGCACTGTATAGGCTCCAA	-8.48868
CCGCCCGTCGCTGCCCGGAACT	-13.2368	8.02579	4.81805e-16	4.59276e-12		TGGCAGTGTGGTTGGCTGGTTG	9.14524	7.1501	1.65128e-13	1.36891e-09		GTAGCGAGACGTCC	11.1451	5.86342	8.83866e-13	1.07856e-08		GGTGAATTTAGGGACAGG	11.1692	12.7591	1.12794e-12	9.06777e-09		GGTGAATTTAGGG	-9.56485	9.41432	1.48588e-11	1.25707e-07		TGAGGTAGTGTTAAATATTGTT	12.0867	8.23628	7.65165e-13	6.01647e-09		ATGATGTAATTTTTTCACCTG	11.6355	5.97086	3.47855e-18	2.43057e-14		CATAAACACCACTCTGATCTA	11.2505	7.93128	8.86213e-14	7.12285e-10		TACTGGCCTTCAAACTTCTT	-9.21463
GAAAGTCTTTCGGTTCCGGGGGAA	-12.2201	7.01513	7.4153e-16	5.48287e-12		AACAGCTCATTAAACTGCCTCT	7.42745	7.49709	8.60112e-13	5.94194e-09		TCACCGGGTATACATTCATCA	-10.216	8.23847	1.10523e-12	1.09797e-08		TGGCAGTGTAGTTAGCTGGTTGA	12.6804	9.69044	8.99847e-12	4.88907e-08		GGGTTATTTTAAAACTTAGATTTGAA	-11.5129	10.9106	1.63723e-11	1.25707e-07		CATAAACACCACTCTGATCTA	12.0417	8.19139	8.1892e-13	6.01647e-09		TACCTCACATAATATCGTCA	11.6711	6.00669	3.10001e-18	2.43057e-14		TATATCCATAAACACCACTCTG	11.1562	7.83915	1.63562e-13	1.09551e-09		TACCTCACATAATATCGTCA	-10.2747
CTCCGGAGAG	-10.2829	8.24759	8.05255e-16	5.48287e-12		GAATTTGTTGAAACTCCTTGAAACA	-12.2332	7.9068	1.40179e-12	7.26304e-09		GGGCTTGATTGTCGTTTTTGTACACT	-12.2122	7.48343	1.82205e-12	1.35757e-08		ACAGCTCACTCAACTGCCATG	10.1662	10.0582	9.60903e-12	4.88907e-08		TTTGCGACCTCTATCAGACCCC	-8.02766	10.6211	2.5115e-11	1.65285e-07		TATATCCATAAACACCACTCTG	11.9513	8.10113	1.32446e-12	8.34053e-09		AAAGATCAGAGTTGTGTTTATG	11.6782	6.01375	2.92934e-18	2.43057e-14		GGGTTATTTTAAAACTTAGATTTGA	-8.53584	10.7764	4.82194e-13	2.76827e-09		AAAGATCAGAGTTGTGTTTATG	-10.281
GAATGCACCGGATCCCGTCC	-11.9961	6.79313	1.98547e-15	1.1829e-11		GGTGAATTTAGGGCCAG	10.4255	5.50857	1.23897e-12	7.26304e-09		GAGACCTCCTGG	10.883	5.60849	1.59621e-12	1.35757e-08		TGAAAGACGTTCTATATCTCT	10.9129	9.88374	1.35377e-11	6.02698e-08		GGTGAATTTAGGGACAGGTCTTCT	-8.61355	8.89122	3.77664e-11	1.93314e-07		TTTGCGACATACTCAGATCAG	8.54554	9.76631	2.59289e-12	1.42872e-08		ATCAGAGTCGTGTTTATGGGT	8.97557	6.12486	6.23057e-18	3.80929e-14		GGTGAATTTAGGGACAGGTCTTCTAAA	-9.01704	7.73587	5.58339e-13	2.80474e-09		ATGATGTAATTTTTTCACCTG	-12.042
TTCGGTTCCGGGG	-10.5255	7.21338	2.80997e-15	1.33929e-11		TACCCGTAGTCCACTGCTGTC	7.47389	6.56051	1.97256e-12	9.08473e-09		GGGCTTGATTGTCGTTTTTGTACA	-12.1497	7.42119	2.19958e-12	1.40998e-08		GGGTTATTTTAAAACTTAGATTTGAA	11.4956	10.4629	1.71204e-11	6.77511e-08		GGTGAATTTAGGGACAGGTCTTCTAAA	-9.9824	8.61806	3.5465e-11	1.93314e-07		CTATATGTTGAGAATACTTTCTGAAC	11.7041	7.85456	3.15223e-12	1.54393e-08		TTGGAAGAAAAGAAAGATCAG	9.77349	5.7396	1.2057e-17	6.55246e-14		ACAGCTCACTCAACTGCCATG	-5.8972	9.52377	1.46024e-12	6.52029e-09		CTATATGTTGAGAATACTTTCTGAAC	-8.7146
TGGACCGTAGCGAGAC	-9.48678	8.63183	2.74155e-15	1.33929e-11		GGTGAATTTAGGGGCAG	10.066	5.15235	3.37325e-12	1.39821e-08		GAGACCTCCTGGGAACCG	10.8653	5.59128	2.3655e-12	1.40998e-08		AACAGCTCATTAAACTGCCTCT	10.2734	9.24831	1.93414e-11	6.88864e-08		GGTGAATTTAGG	-7.8936	9.74719	6.38714e-11	2.94243e-07		TACTGGCCTTCAAACTTCTT	11.5573	7.70826	3.99338e-12	1.76032e-08		TTGCACATAGACTATTCTGAA	9.76166	5.68037	1.50652e-17	7.36855e-14		GGTGAATTTAGGG	-6.95098	8.52408	2.13072e-12	8.56274e-09		TGAGGTAGTGTTAAATATTGTT	-8.87954
CGGTTCCGGGGGAA	-10.6178	7.29946	4.35523e-15	1.72982e-11		GGGCTTGATTGTCGTTTTGGTACACT	-11.994	7.6697	8.10464e-12	2.80881e-08		GGAACTTCGAAGATCTTTGTAACT	-12.0263	7.29821	2.62909e-12	1.41573e-08		TGGCAGTGTAGTTCGCTGGTTG	10.2864	9.26067	2.97294e-11	9.6003e-08		GGTGAATTTAGGGACAGGTCTTCTA	-8.25478	8.53293	1.76866e-10	7.40715e-07		TTTATGGGTATATCCCAATGG	11.4087	7.56006	6.95108e-12	2.73796e-08		CATAAACACCACTCTGATCT	10.8741	5.2058	3.9077e-16	1.73754e-12		TTTATGGGTATATCCCAATGG	10.6336	7.32988	3.08748e-12	9.22784e-09		TTTGCGACCTCTATCAGACCCC	-7.72879
AGAACTGGCACGGACA	-8.51838	7.99256	4.18569e-15	1.72982e-11		GGTGAATTTAGGGCCAGG	9.98921	5.07572	8.13165e-12	2.80881e-08		GAGCTATGATGTAACTATAATGAGCCTGATCTATTTGATGTGAACTCCGCTTCTGAGCTCT	-7.97227	10.6547	2.85017e-12	1.41573e-08		TCCCTGAGATTTCATATAACCGG	9.9645	11.9719	3.2346e-11	9.6003e-08		GGTGAATTTAGGGACAG	-10.65	12.5142	3.26315e-10	1.25272e-06		ATCAGAGTCGTGTTTATGGGT	11.4027	7.55412	7.45345e-12	2.73796e-08		AAGATGAAGTTTCGGATATAG	10.8652	5.19613	4.91491e-16	2.00328e-12		ATCAGAGTCGTGTTTATGGGT	10.6236	7.3204	2.91738e-12	9.22784e-09		AGGTTGGAGA	-9.16531
GGTTTCACGTCA	-10.3752	7.06411	5.56644e-15	2.04083e-11		GTAATTGTGGATTCATTTGAGGAAA	-11.7494	7.42772	1.21537e-11	3.87516e-08		GACATCGGTGTTGTTCTTGTAGAAT	-11.8872	7.1597	3.55362e-12	1.5048e-08		TGGCAGTGTGATTAGCTGGTTGA	9.89911	9.72348	4.06316e-11	1.11318e-07		GGTGAATTTAGGGACAGGTCTTC	-9.17777	7.81283	7.56601e-10	2.68116e-06		TGTAATTTTTTCACCTGTCTTT	11.3848	7.53625	8.33282e-12	2.82553e-08		TGTAATTTTTTCACCTGTCTTT	8.19785	6.10899	1.86222e-15	7.00639e-12		TGTAATTTTTTCACCTGTCTTT	10.6036	7.30102	3.21471e-12	9.22784e-09		GGGGATATAGCTCAGTGGTAGAGCATGTGACTGC	-7.94336
GCACCGGATCCCGTCC	-11.8024	6.60118	7.72849e-15	2.63111e-11		AATGGCACCTTTGCACGTGTGC	8.04376	4.79119	2.25314e-11	6.6709e-08		GTAACCTGAATGGTCGGATTTGACA	-11.8747	7.14731	3.79972e-12	1.5048e-08		TCACCGGGTATACATTCATCA	-8.70854	10.391	8.42667e-11	2.14374e-07		GGTGAATTTAGGGACAGGTCTTCTAAACTTGTTTTGAGCTAGTAACTCATTCACTTC	-8.17387	7.56974	8.78522e-10	2.89084e-06		GTGCGGTGATTAAGAGAATTTCTGAGCTTA	8.99764	8.01593	1.04666e-11	3.29557e-08		TACCTCACATAATATCGTCAA	8.96975	4.93465	2.32518e-15	8.12334e-12		GGTGAATTTAGGGACAGGTCTTCT	-7.94553	8.01114	3.05337e-12	9.22784e-09		TGTAATTTTTTCACCTGTCTTT	-8.39463
CTTTCGGTTCCGGGGGA	-11.6331	6.43391	1.12329e-14	3.34891e-11		GCGGGTTTAAGTTAAGTTTAA	8.29127	5.74297	2.72268e-11	7.45109e-08		GGAGAAGTTGTTGGTTGTGGAATCA	-11.8732	7.14572	4.03932e-12	1.5048e-08		TGGCAGTGTAGTTGGCTGGTTG	11.8107	8.82346	1.38774e-10	3.14246e-07		GGGTTATTTTAAAACTTAGATTTGAAA	-11.9121	8.69203	1.21569e-09	3.73364e-06		TGAAAGACGTTCTATATCTC	11.3573	7.50889	1.5946e-11	4.11342e-08		AAAGATCAGAGTTGTGTTTATGG	10.5616	4.89146	2.8059e-15	9.14928e-12		AAAGATCAGAGTTGTGTTTATG	10.5133	7.21421	6.05881e-12	1.58056e-08		TAGAATGAGGACACCATATCAAACCTGAGT	-9.82688
GCCCGGAACTGAGCA	-10.7033	7.38475	1.12422e-14	3.34891e-11		GGTGAATTTAGGGGCAGG	9.72215	4.81166	2.87617e-11	7.45109e-08		GAAAAACAACAAACTAATTAAAGG	-11.8686	7.14136	3.89442e-12	1.5048e-08		GGTGAATTTAGGG	9.22991	9.0566	1.41171e-10	3.14246e-07		GGTGAATTTAGGGCCAG	-10.8352	7.61219	1.41003e-09	4.05982e-06		AAAGATCAGAGTTGTGTTTATG	11.3106	7.4624	1.83935e-11	4.11342e-08		AAAGATCAGAGTTGTGTTTATGGG	10.507	4.83747	4.4555e-15	1.36202e-11		TACCTCACATAATATCGTCA	10.5061	7.20729	6.49722e-12	1.58056e-08		TCACCGGGTATACATTCATCA	-9.01471
CGGTTCCGGGGGA	-9.38058	7.39245	1.42681e-14	4.00027e-11		GGATCTATTTTCTCGATCAGAAGGCT	-11.4246	7.10716	3.6768e-11	8.9649e-08		GAAATATATATATAGGTTGG	-9.98697	7.21198	5.62641e-12	1.97275e-08		TGGCAGTGTGGTTAGCTGGTTG	9.59378	13.8111	2.1837e-10	4.57498e-07		GGTGAATTTAGGGACAGGTCTTCTAAACTTGTTTTA	-10.7739	7.5508	2.01284e-09	5.45456e-06		TACCTCACATAATATCGTCA	11.3043	7.45608	1.94782e-11	4.11342e-08		TGAAAGACGTTCTATATCT	7.34376	5.60061	5.96643e-15	1.71661e-11		TCCATAAACACCACTCTGATC	10.4606	7.16306	6.6861e-12	1.58056e-08		CAAGCGGCCGATTCGGGTTCGATTCCCGATAAACGCACCA	-8.98322
AGGACGTGAAACCGAT	-11.6472	6.44759	2.36524e-14	5.84848e-11		GGGGATATAGCTCAGTGGTAGAGCA	-8.17707	9.22107	6.01157e-11	1.36018e-07		GAGCTATGATGTAACTATAATGAGCCTGATCTATTTGATGTGAATTCCGCTTCTGAGCTCT	-7.6701	9.93334	7.3142e-12	2.22077e-08		TCCCTGAGACTCTACTTGTG	9.18944	10.5728	2.31341e-10	4.57747e-07		GGTGAATTTAGGGACAGGTCTTCTAA	-8.93703	7.52507	2.84896e-09	7.29143e-06		ATGATGTAATTTTTTCACCTG	11.2657	7.41763	1.99598e-11	4.11342e-08		CTATATGTTGAGAATACTTTCTGAAC	7.34989	6.42659	7.63251e-15	2.07397e-11		ATGATGTAATTTTTTCACCTG	10.4711	7.17332	7.10519e-12	1.58631e-08		TTGAGATCAATGGGAATCTTCAA	-9.67025
AAGGGTTTCACGTC	-9.78973	7.17099	2.45415e-14	5.84848e-11		TGGCAGTGTGATTTGCTGGTTG	9.76607	4.85433	6.23484e-11	1.36018e-07		GATCCCGTCCGATCTCCG	10.5684	5.30413	7.45149e-12	2.22077e-08		TGGCAGTGTGGTTAGCTGGTTGT	9.54336	8.52133	3.16029e-10	5.92405e-07		GGTGAATTTAGGGGCAG	-8.68998	7.27775	3.23955e-09	7.85471e-06		TCCATAAACACCACTCTGATC	11.2493	7.40134	1.74434e-11	4.11342e-08		TGAAAGACGTTCTCTATCTCT	8.78417	4.69896	8.26104e-15	2.12661e-11		GGTGAATTTAGGGACAG	-9.69187	11.4131	8.80415e-12	1.86217e-08		TGAGATCAATGGGAATCTTCAA	-11.4087
TCGGTTCCGGGGGAAGT	-9.41983	6.86311	2.25607e-14	5.84848e-11		GGGCTTGATTGTCGTTTTTGTACACT	-11.4238	7.10619	7.4342e-11	1.50186e-07		GTCGCTGCCCGG	10.701	5.43212	6.86381e-12	2.22077e-08		TGGCAGTGTGGTTGGCTGGTTG	9.0819	8.90955	3.84072e-10	6.83956e-07		GGTGAATTTAGGGAC	-7.9705	7.89241	3.48497e-09	8.02728e-06		TTTGCGACTGTATCCAAAAC	8.95935	7.92029	1.65308e-11	4.11342e-08		ATTGGAAGAAAAGAAAGATCAG	10.3248	4.65372	1.15151e-14	2.81607e-11		GGTGAATTTAGGGACAGGTCTTCTA	-8.89836	7.65612	1.34077e-11	2.69407e-08		TTTGCGACATACTCAGATCAG	-6.84299
TTTCGGTTCCGGGGGAA	-10.2317	6.9231	2.7444e-14	6.19208e-11		GATTCCGTA	5.87764	7.27571	7.60893e-11	1.50186e-07		GTAATTGTGGATTCATTTGAGGAA	-11.6522	6.92582	1.09332e-11	2.96221e-08		ACAGCTCATTAAACTGCCTCT	8.82261	8.65164	5.17221e-10	8.77207e-07		ACAGCTCATTAAACTGCCTCT	-6.88619	9.02116	4.06753e-09	8.51741e-06		TTTGCGTACATATTTCTGAACCTC	7.20019	9.73411	2.05293e-11	4.11342e-08		TTATCTAGTAAAAAATCTTTC	10.2307	4.55851	2.04194e-14	4.75588e-11		GGGTTATTTTAAAACTTAGATTTGAA	-7.30642	9.86557	1.43761e-11	2.75111e-08		ATAGGTCTATTTGTTTTCTCATG	-7.38459
ACCGCCCGTCGCT	-10.0299	6.71594	2.85816e-14	6.19208e-11		AATGGCACCTTTGCACGTGTGCG	7.70543	4.45998	9.34858e-11	1.76136e-07		AAGGGTTTCACGTCA	7.31173	6.5468	1.04863e-11	2.96221e-08		GGTGAATTTAGGGACAGGTCTTCTAAACTTGTTTTGAGCTAGTAACTCAT	8.78676	9.16194	5.68441e-10	9.20254e-07		TTTTGGAATGAAGCTAGAAATAGCTTCTAA	-7.90706	9.00436	4.00827e-09	8.51741e-06		TCCCTGAGACTCTACTTGTGA	7.06988	11.1212	1.91428e-11	4.11342e-08		TTTGCGACTGTATTCAAAACCC	7.67935	4.82895	2.81977e-14	6.26899e-11		TTGGAAGAAAAGAAAGATCAG	10.2423	6.9524	2.48692e-11	4.5428e-08		TTGTGACCGTTATAACGACTATT	-7.99634
TGGACCGTAGCGAGACGTCCTACT	-8.4906	7.16023	3.04635e-14	6.31282e-11		GGGCTTGATTGTCGTTTTTGTACA	-11.3635	7.04683	9.84566e-11	1.77436e-07		TGAGATTCTCTTTTCTTCATTCAA	-11.5978	6.87194	1.4161e-11	3.6699e-08		TCCCTGAGATTTCATATAACCGGA	9.56566	10.5656	7.10155e-10	1.09969e-06		ATTTTTGGAAGGCCGAGAGGCCTGA	-6.54189	8.86446	5.56013e-09	9.85169e-06		TGAGATCAAATTAGACTTATCG	7.03759	13.4615	2.9795e-11	5.71041e-08		AAAGATCAGAGTCGTGTTTATGGG	10.0934	4.42131	4.616e-14	9.81622e-11		TTGCACATAGACTATTCTGAA	10.1823	6.89513	3.00255e-11	5.24623e-08		TTGGAAGAAAAGAAAGATCAG	-7.78926
CCGGGGGAAGT	-11.464	6.26745	3.73891e-14	7.12815e-11		GGTGAATTTAGGGACAG	6.99277	10.2723	1.03276e-10	1.78367e-07		GAACATGTCAACTAAATATGAACT	-11.5824	6.85662	1.62859e-11	3.88294e-08		CCGCCCGTCGCTGCCC	-7.88855	10.1391	1.11581e-09	1.65586e-06		TTTGCAACGTAACTGGGCTTA	-6.96457	8.51474	5.20474e-09	9.85169e-06		TTGGAAGAAAAGAAAGATCAG	11.0172	7.17026	3.38284e-11	6.2133e-08		TTTGCGACTGTATTCACATCACT	5.88225	7.02743	5.70014e-14	1.1152e-10		GGTGAATTTAGGGACAGGTCTTC	-10.2838	6.93987	4.7237e-11	7.90963e-08		AGGTTGGAGAA	-8.31782
TCGGTTCCGGGGGAA	-9.96404	6.65106	3.63194e-14	7.12815e-11		GGAACTTCGAAGATCTTTGTAACT	-11.2353	6.92059	1.09398e-10	1.81382e-07		AAAGTCTTTCGGTTCCG	8.09734	5.90907	1.61672e-11	3.88294e-08		TGGCAGTGTGATTAGCTGGTT	8.53632	8.91412	2.81148e-09	4.00535e-06		TTTGGAAGGCCGAGAGGCCTGA	-7.62649	9.07263	4.99453e-09	9.85169e-06		TTGCACATAGACTATTCTGAA	10.9659	7.11914	4.71949e-11	8.32159e-08		TTTGCGACTGTATTCAAAACCCG	6.35809	6.27651	5.67315e-14	1.1152e-10		GGTGAATTTAGGGCCAG	-10.0767	6.73478	6.65601e-11	1.06994e-07		ATATAGGTTGGAGAA	-8.53156
CTTTCGGTTCCGGGGGAA	-9.84026	6.52846	5.46854e-14	9.90589e-11		GACATCGGTGTTGTTCTTGTAGAAT	-11.0946	6.78228	1.44874e-10	2.30962e-07		TTTGCACTTAGATACCTGACTACA	-8.06971	7.74141	1.99444e-11	4.57233e-08		TGACAGCAGGGCG	-11.0395	8.07789	5.84595e-09	8.00806e-06		GCGGGTTTAAGTTAAGTTTAA	-11.0269	7.80513	5.53512e-09	9.85169e-06		TTTGCGACATACTCAGATCA	8.87967	7.05169	4.97127e-11	8.42841e-08		AAAGATCAGAGTCGTGTTTATGG	10.0932	4.42288	7.80632e-14	1.46852e-10		GGTGAATTTAGGGGCAG	-9.70643	6.37026	7.61423e-11	1.1769e-07		ATCAGAGTCGTGTTTATGGGT	-7.20048
GGCTGGCGTAGT	-9.28303	6.72755	5.61158e-14	9.90589e-11		GTAACCTGAATGGTCGGATTTGACA	-11.081	6.76896	1.52214e-10	2.33677e-07		TTTTGTATTGCTGAATTTTTGCTC	-7.576	9.29274	2.24238e-11	4.77355e-08		TGGCAGTGTGATTCGCTGGTTG	8.51095	8.41458	7.07323e-09	8.6869e-06		ATCGCTTCTCGAGCTTTTTAGCTCAGATCAAAGTG	-6.10755	9.86209	5.84122e-09	9.96643e-06		TGAGATCAATGGGAATCTTCAAA	7.69103	9.34973	6.42682e-11	1.04926e-07		ATATTTGAAACTTCATCTTTG	9.94183	4.26704	1.48769e-13	2.69499e-10		GGTGAATTTAGGGACAGGTCTTCTAAACTTGTTTTGAGCTAGTAACTCATTCA	-9.76968	6.4319	1.02358e-10	1.52351e-07		TAAATATGAATGTGAATGTTATA	-7.39127
AGTCTTTCGGTTCCGGGGGAAGT	-11.2422	6.0484	6.52651e-14	1.08489e-10		GAAAAACAACAAACTAATTAAAGG	-11.0788	6.76698	1.71957e-10	2.54558e-07		GCCCGTCGCTGCCCG	7.79331	5.55765	2.24152e-11	4.77355e-08		GGTGAATTTAGG	7.65494	9.37592	6.94707e-09	8.6869e-06		GGTGAATTTAGGGCCAGG	-10.404	7.17961	6.23438e-09	1.02573e-05		TAGAATGAGGACACCATATCAAACCTGAGT	10.8574	7.01126	7.96559e-11	1.25404e-07		ATGTAATTTTTTCACCTGTCT	9.85741	4.1841	1.90023e-13	3.31937e-10		GGTGAATTTAGGGACAGGTCTTCTAAACTTGTTTTA	-10.0216	6.67984	1.27381e-10	1.82824e-07		ATAGGTTGGAGAA	-8.48243
CGCCCGTCGCTGCCC	-11.2191	6.02589	6.60102e-14	1.08489e-10		TACCCGTAGTCCATTGCTGTC	6.19344	5.46322	2.24501e-10	3.20882e-07		GAATGCACCGGATCCCGTCC	10.2864	5.0333	2.36348e-11	4.85784e-08		ACGTCGGGTTCACCA	-10.91	7.95039	6.80065e-09	8.6869e-06		GTGAAATTCTTGGACCGTAGCG	10.8757	7.7084	6.98549e-09	1.10968e-05		TGAAAGACGTTCTATATCT	10.8831	7.03682	8.37164e-11	1.27252e-07		TATTCTGAAATTGTTTTTAATC	9.84702	4.17476	2.29713e-13	3.87431e-10		CTATATGTTGAGAATACTTTCTGAAC	6.4275	7.61694	1.95907e-10	2.71479e-07		TTTGGGAACATGTCCAGAACCTTA	-6.62631
TGAAAGACGTTCTATATCTCT	11.5765	9.26877	7.20195e-14	1.1442e-10		GGTGAATTTAGGGACAGG	7.62675	11.0117	2.44356e-10	3.37618e-07		GGTTTTAACTCAAGTAATCTGGACA	-11.4306	6.70542	2.49456e-11	4.95636e-08		GAAAGTCTTTCGGTTCCGGGGGAA	-7.53737	8.83598	8.8355e-09	1.04895e-05		GGTGAATTTAGGGACAGGTCTTCTAAACTTGTTTTGA	-8.47417	7.06151	7.51598e-09	1.15415e-05		TCGAATCGTCTAGAAGTTAATT	7.25432	8.65079	1.01704e-10	1.49441e-07		ATAGGAAATGAATCAGGAGAGA	7.14424	4.71709	2.83457e-13	4.62139e-10		TGAGGTAGTGTTAAATATTGTT	5.84442	7.99621	2.09451e-10	2.71522e-07		TTTGCGACCAAACTTAGATCAA	-6.77494
CGCCCGTCGCTGCCCGGAACT	-11.2158	6.02239	7.63218e-14	1.17344e-10		GGTGAATTTAGGGTCAG	7.57716	4.28083	4.00899e-10	5.36041e-07		GTCTAACTCGTTGAAATTCTGCTACT	-11.2912	6.56698	3.03902e-11	5.84335e-08		GGTGAATTTAGGGACAG	8.93651	12.0413	9.84837e-09	1.09612e-05		GGTGAATTTAGGGACAGGTCTTCTAAACTTGTTTTGAGCTAGTA	-10.2406	7.01509	9.65651e-09	1.43502e-05		TCCCTGAGACTCTACTTGT	10.6925	6.84728	1.44286e-10	2.0517e-07		TACCCGTAGTCCACTGCTGTC	6.68737	5.0084	3.23931e-13	4.95119e-10		GGTGAATTTAGGGACAGGTCTTCTAAACTTGTTTTGA	-9.48593	6.15339	2.0601e-10	2.71522e-07		TATTATGCAAAGTAGAGTGCA	-8.2436
GAAAGTCTTTCGGTTCCGGGG	-8.65954	7.02152	7.89961e-14	1.1766e-10		ACAGCTCACTCAACTGCCATG	5.04598	8.35582	4.41689e-10	5.67398e-07		AGAAGTTTGATTGCCATGAACA	-11.6366	6.9105	3.19265e-11	5.9469e-08		GGTGAATTTAGGGACAGGTCTTCTAAA	7.59689	8.27854	9.6179e-09	1.09612e-05		GGTGAATTTAGGGACAGGTCTTCTAAAC	-8.41801	7.05274	1.36034e-08	1.95838e-05		ATAGGAAATGAATAAGGAGA	7.83126	7.75601	1.62572e-10	2.23948e-07		GTGTTTGG	7.27197	4.42295	3.20077e-13	4.95119e-10		ACAGCTCATTAAACTGCCTCT	-5.99096	8.12558	2.3224e-10	2.91657e-07		TCCATAAACACCACTCTGATC	-7.64282
ACACCGCCCGTCGCT	-9.9817	6.67507	8.40371e-14	1.21375e-10		TGGCAGTGTAGTTAGCTGGTTG	5.6189	13.3933	4.51728e-10	5.67398e-07		TAAATATGAATGTGAATGTTATA	-8.03149	8.3292	3.81776e-11	6.72418e-08		TCACCGGGTATACATTCATC	-7.43627	9.44307	1.22839e-08	1.32577e-05		GGTGAATTTAGGGACAGGTCTTCTAAACTTGTTTTGAGCTAGTAACTCATTCA	-7.41007	7.33201	1.41547e-08	1.976e-05		TCCCTGAGATTTCATATAACCG	10.5172	6.67322	2.70303e-10	3.61068e-07		TATCCATAAACACCACTCTGA	9.75901	4.0846	3.48346e-13	5.16302e-10		GGTGAATTTAGGGACAGGTCTTCTAAACTTGTTTTGAGCTAGTA	-9.44266	6.11086	2.56737e-10	3.12652e-07		GTGCGGTGATTAAGAGAATTTCTGAGCTTA	-7.70121
ACCGCCCGTCGCTGCCC	-9.32634	6.76442	1.24727e-13	1.72785e-10		TATTGCACACGTCTCGGCCTGA	6.82113	5.40534	4.81608e-10	5.87137e-07		GAGACCTCCTGGG	10.215	4.96506	3.83555e-11	6.72418e-08		GGGTTATTTTAAAACTTAGATTTGAAA	11.3738	8.38852	1.34488e-08	1.36855e-05		GAGCTATGATGTAACTATAATGAGCCTGATCTATTTGATGTGAACTCCGCTTCTGAGCTCT	-5.94152	9.97025	1.46168e-08	1.98049e-05		AAGATGAAGTTTCGGATATAG	10.4728	6.62915	2.88644e-10	3.74227e-07		TTTGGGAACATGTTCAGAACCTT	8.19737	4.11401	3.79474e-13	5.30299e-10		GGTGAATTTAGGGCCAGG	-7.57306	6.30672	3.35611e-10	3.87546e-07		GTAACCTGAATGGTCGGATTTGACA	-11.042
ACTCCGGAGAGA	-9.10027	6.54709	1.26883e-13	1.72785e-10		GTAATTGTGGATTCATTTGAGGAA	-10.863	6.55506	4.99556e-10	5.91617e-07		TTTGCGACTGTATCCAAACTAC	-7.66116	10.5055	4.44239e-11	7.49936e-08		GAAGGGCACCACCAGGAGTGGAGCCTGCGGC	-10.3249	7.38302	1.32376e-08	1.36855e-05		GTAGAATGAGGACACCATATCAAACCTGAGT	-8.39495	7.02988	1.6202e-08	2.01728e-05		CATAAACACCACTCTGATCT	10.4951	6.65127	3.00972e-10	3.79061e-07		TATATTTGAAACTTCATCTTTG	9.74121	4.06736	3.79022e-13	5.30299e-10		GGTGAATTTAGGGACAGGTCTTCTAA	-10.0068	6.66451	3.37525e-10	3.87546e-07		CATAAACACCACTCTGATCT	-7.7914
TTTCGGTTCCGGGGGAAGT	-8.87054	7.27526	1.33923e-13	1.75879e-10		TCCCTGAGACTCTCCTTGTGA	6.61991	4.94165	5.78573e-10	6.66162e-07		CGGTTCCGGG	8.3182	5.28857	4.53167e-11	7.49936e-08		CCTGCCAGGATCGCCA	-6.66111	9.64241	1.54354e-08	1.48977e-05		GGGTTATTTTAAAACTTAGATTTA	-8.7735	7.36051	1.59962e-08	2.01728e-05		TGGCAGTGTGGTTAGCTGGTTG	6.31812	9.75415	4.28268e-10	5.24402e-07		CCCGGGG	6.91965	4.72867	6.85434e-13	9.31258e-10		CATAAACACCACTCTGATCT	9.71157	6.44675	3.75027e-10	4.18645e-07		TTGCACATAGACTATTCTGAA	-7.34265
ACTCCGGAGAG	-8.83371	6.85046	1.36534e-13	1.75879e-10		TCACCGGGTATACATTCATCA	-7.34759	7.85831	6.63472e-10	7.43268e-07		GATCCCGTCC	8.91174	5.87461	4.65517e-11	7.49936e-08		TCCGGGGGAAGT	-7.29016	8.58429	1.58949e-08	1.48977e-05		GGTGAATTTAGGGGCAGG	-10.1378	6.91248	1.6094e-08	2.01728e-05		TGGCAGTGTGATTAGCTGGTTGA	7.85097	6.87673	6.55637e-10	7.81111e-07		TATATCCATAAACACCACTCT	7.96776	3.92916	8.94001e-13	1.1818e-09		GGGTTATTTTAAAACTTAGATTTGAAA	-11.23	7.8803	3.86143e-10	4.19403e-07		AAAGATCAGAGTTGTGTTTATGG	-10.9543
CGGTTCCGGGG	-9.92792	6.5558	1.40563e-13	1.76303e-10		GAACATGTCAACTAAATATGAACT	-10.7916	6.48562	7.04314e-10	7.68259e-07		ATGGCACTGAATGAGCTCACG	-7.89934	7.75548	4.80476e-11	7.53664e-08		GGGGCTGCACGCGCGCT	-10.4582	7.51075	1.58494e-08	1.48977e-05		GGTGAATTTAGGGACAGGTCTTCTAAACTTGT	-10.076	6.85006	1.76231e-08	2.0817e-05		GTAACCTGAATGGTCGGATTTGACA	10.2664	6.42439	7.60019e-10	8.81642e-07		TGATGTAATTTTTTCACCTGTC	7.94297	3.9057	9.56564e-13	1.23122e-09		GGTGAATTTAGG	-5.32293	8.85444	4.32601e-10	4.57499e-07		TATTATGCCTGACTACAGAGTCT	-7.80131
TTGGACCGTAGCGAGAC	-9.93233	6.62122	1.93739e-13	2.32453e-10		TGGCAGTGTGGTTCGCTGGTTG	11.7489	6.8263	7.93021e-10	8.42839e-07		GGATCCCGTCC	8.50889	5.47297	5.05366e-11	7.72381e-08		GAATGCACCGGATCCCGTCC	-7.32082	8.61412	1.75675e-08	1.60432e-05		GGTGAATTTAGGGACAGGTCTTCTAAACTTGTTTTGAGCTAGTAACTCATA	-10.1573	6.93228	1.72806e-08	2.0817e-05		TTTGCGACTGTATCCACATCACT	6.08935	13.4321	8.13354e-10	9.03349e-07		AGGCAAGATGTTGACATAGCTG	7.76089	3.72538	2.77707e-12	3.39573e-09		AAGATGAAGTTTCGGATATAG	9.70496	6.43972	5.30463e-10	5.46608e-07		CGCAATGATGAAAAATGACCTCTGATT	-8.04431
CCCGGAACTGAGC	-9.93205	6.62744	1.95084e-13	2.32453e-10		TGGCAGTGTAGTTAGCTGGTTGATGATGCAGAAAATCAACAGCTTACCAAATTGCCATC	7.16524	3.9373	9.86294e-10	1.02205e-06		GAATGTTTAGAAACTCTTAGAACT	-11.2441	6.52018	5.47708e-11	7.96261e-08		TTTCGGTTCCGGGGGAA	-7.01398	8.70936	1.83488e-08	1.63377e-05		GGTGAATTTAGGGACAGGTCTTAAA	-10.0691	6.84347	1.90747e-08	2.19683e-05		GAAAGTCTTTCGGTTCCGGGGGAA	-7.32453	8.04017	8.19717e-10	9.03349e-07		TATATCCCAATGGTGATCAAG	9.41022	3.73619	2.73056e-12	3.39573e-09		GGTGAATTTAGGGACAGGTCTTCTAAACTTGT	-9.28223	5.95326	6.99302e-10	7.02571e-07		TTAGTTGGATAACTGAGGTAATTCTTGAGCTAATACACGCTTT	-7.86347
TGACAGCAGGGCG	-9.59284	6.28482	2.1029e-13	2.44459e-10		ATTTTTGGAAGGCCGAGAGGCCTGA	5.43674	6.75108	1.03447e-09	1.03186e-06		CGGTTCCGGGG	8.25264	5.17079	5.37576e-11	7.96261e-08		TTTCGGTTCCGGGG	-10.1467	7.21093	2.0303e-08	1.76368e-05		GGTGAATTTAGGGACAGGTCTTCTAAACTTG	-10.0364	6.81038	2.03564e-08	2.28727e-05		TCCCTGAGATTTCATATAACCGGAG	10.186	6.34475	9.22974e-10	9.92332e-07		TTGCACATAGACTATTCTGAAA	9.35867	3.68533	3.89921e-12	4.54081e-09		TTGAGATCAATGGGAATCTTCAA	7.27346	6.6651	7.34863e-10	7.20291e-07		GTGAATCCGTG	-8.34391
AGTCTTTCGGTTCCGGGGGAA	-10.9871	5.79754	2.24866e-13	2.5518e-10		GGGTTATTTTAAAACTTAGATTTGAAA	7.35071	6.64595	1.04556e-09	1.03186e-06		GTAAGCATCAACAAACAATTTGACA	-11.268	6.54419	5.61695e-11	7.97152e-08		ACCGGATCCCGTCC	-10.1704	7.23315	2.21182e-08	1.87562e-05		TTGGAATGAAGCTAGAAATAGCTTCTAAT	-6.31135	8.62295	2.26248e-08	2.48161e-05		AAAGATCAGAGTTGTGTTTATGG	10.179	6.33788	9.63424e-10	1.01116e-06		TTCGGATATACAGAATATGGC	9.35867	3.68533	3.89359e-12	4.54081e-09		GGTGAATTTAGGGACAGGTCTTCTAAACTTG	-9.24822	5.91958	1.01099e-09	9.67352e-07		TACCTCACATAATATCGTCAA	-9.20334
ATTCTTGGACCGTAGCGAGACGTCCTAC	-9.65623	6.34772	2.31254e-13	2.56326e-10		GGTTTTAACTCAAGTAATCTGGACA	-10.6397	6.33668	1.12235e-09	1.08189e-06		GATTTATTTATTTTGTTAGTTGGGTT	-11.171	6.44753	6.5614e-11	9.09532e-08		GGTGAATTTAGGGCCAG	8.21124	7.28205	2.32041e-08	1.92194e-05		GGTGAATTTAGGGACAGGTCTT	-10.0399	6.81435	2.36261e-08	2.53118e-05		TCCCTGAGACTCTACTTGTGAC	7.01319	7.2263	1.02454e-09	1.05029e-06		AAGGGTTTCACGTCA	6.55124	4.65345	4.2955e-12	4.88598e-09		GGTGAATTTAGGGGCAGG	-9.37043	6.03795	1.20998e-09	1.13083e-06		TCCCATGTAGTCTAGTGGTTATGATTTGCGGCTC	-7.2792
GCCCGTCGCTGCCCGGAAC	-8.85296	6.35455	2.4535e-13	2.59864e-10		GGTGAATTTAGGGACAGGTCTTAAA	6.12627	4.76761	1.40306e-09	1.32175e-06		GAGCAATATCATTTCTGTAGGAGGCT	-11.064	6.34145	6.9504e-11	9.41558e-08		TCACCGGGTATACATTCATCAA	-7.78402	8.52184	2.47213e-08	2.00108e-05		GAAATATATATATAGGTTGG	-8.64771	7.23441	3.09193e-08	3.23725e-05		TGAGATTCTCTTTTCTTCATT	8.15581	6.33438	1.09424e-09	1.08662e-06		AGGCAAGATGTTGACATAGCTGA	6.56998	4.34764	7.00175e-12	7.61028e-09		GGTGAATTTAGGGACAGGTCTTAAA	-9.29295	5.96256	1.24451e-09	1.13666e-06		TTTATGGGTATATCCCAATGG	-7.8189
TCCGGGGGAAGT	-8.81511	6.78052	2.42989e-13	2.59864e-10		GTCTAACTCGTTGAAATTCTGCTACT	-10.5005	6.20116	1.44575e-09	1.33169e-06		GGCTGGCGTAGT	7.55884	5.33982	7.72496e-11	1.02323e-07		GGTGAATTTAGGGACAGGTCTTCTAAACTTGTTTTGAGCTAGTAACTCA	9.86978	10.5302	2.58955e-08	2.04954e-05		GTGAAATTCTTGGACCG	10.4734	7.32121	3.3374e-08	3.34234e-05		TCACCGGGATATCAGATGCTC	-8.03321	7.80911	1.10928e-09	1.08662e-06		GCCCGTC	7.00713	4.2389	6.97214e-12	7.61028e-09		GTAACCTGAATGGTCGGATTTGACA	9.48013	6.22892	1.28185e-09	1.14475e-06		AAAGATCAGAGTTGTGTTTATGGG	-9.1064
GTACTCCGGAGAG	-10.8802	5.69324	2.93988e-13	3.0461e-10		GGGTTATTTTAAAACTTAGATTTGAA	5.48206	8.73197	1.67107e-09	1.50578e-06		GTACTTCAGAGTGTTTCTCGTCCGA	-11.0088	6.28665	8.3755e-11	1.08528e-07		ACAGCTCACTCAACTGCCATGC	8.16022	7.232	2.89226e-08	2.13356e-05		TTTTGGAATGAAGCTAGAAATAGCTTCTAAT	-6.97993	8.13089	3.32724e-08	3.34234e-05		TACCTCACATAATATCGTCAA	10.2333	6.3916	1.18089e-09	1.10818e-06		TGAGATCATATTAAACCCATCT	6.57022	5.70661	8.04286e-12	8.55183e-09		TTGAGATCAATGGGAATCTTCA	5.4267	7.56475	1.36801e-09	1.19513e-06		GGGGAAGTATG	11.2827
GCTGCCCGGAACTGAGC	-8.67701	6.70094	3.09477e-13	3.13836e-10		GGTTCCATGGTGTAGCGGTTAGCACTCAG	-6.60864	8.86827	2.07921e-09	1.79539e-06		GTAAACTGTAGAAAGTGTTCCCACT	-11.0921	6.36939	8.61466e-11	1.09252e-07		GGCGGGGAGTTTG	-7.56599	8.31919	2.92603e-08	2.13356e-05		GGTGAATTTAGGGACAGGTCTTCTAAACTTGTTTTAA	-9.88409	6.6579	3.85676e-08	3.78028e-05		GTGAATCCGTG	10.1439	6.30312	1.19201e-09	1.10818e-06		ACACGGACC	6.70643	3.8627	9.5901e-12	9.77978e-09		GGTGAATTTAGGGACAGGTCTTCTAAACTTGTTTTGAGCTAGTAACTCATA	-7.33487	6.07233	1.59238e-09	1.33319e-06		GAAATATATATATAGG	-8.00437
CAGCGGGGAAA	-11.0553	5.86423	3.18183e-13	3.15942e-10		GGTGAATTTAGGG	4.97764	7.35916	2.07262e-09	1.79539e-06		GTTAGTGGCG	7.44295	5.70978	8.87348e-11	1.10123e-07		CGTTGGGCTTTGCCCGCGCG	-10.0599	7.127	2.88417e-08	2.13356e-05		GATCCCGTCCGATCTCCG	10.4312	7.28084	4.20305e-08	3.95603e-05		TGGCAGTGTAGTTAGCTGGTTG	8.43353	10.4201	1.25698e-09	1.10818e-06		ACCGCGGAA	6.77095	4.34503	9.59762e-12	9.77978e-09		GCGGGTTTAAGTTAAGTTTAA	-10.3247	6.97841	1.58127e-09	1.33319e-06		GGAGAAGTTGTTGGTTGTGGAATCA	-10.9896
AGTACTCCGGAGAG	-10.8302	5.64394	3.50484e-13	3.40913e-10		GGTGAATTTAGG	5.24348	7.66131	2.12242e-09	1.79539e-06		AAAGTTAGAGGTTCG	10.0569	4.81446	9.0528e-11	1.10123e-07		ACTGGGGCGGTA	-10.13	7.19409	2.93533e-08	2.13356e-05		TAATTTTTTGTTATATATATATTAGGATT	-6.84532	7.09584	4.55001e-08	3.95603e-05		TTGTGACCGTTATAACGACTATT	7.06661	7.58823	1.25338e-09	1.10818e-06		TGTAATTTTTTCACCTGTCTT	7.52911	3.49505	1.02125e-11	9.99003e-09		AAGGATCATT	-4.59242	9.77889	1.7904e-09	1.46839e-06		GTTAAGAATAG	-10.7047
GGCGGGGAGTTTG	-9.03173	6.47915	3.78099e-13	3.6042e-10		GAATGTTTAGAAACTCTTAGAACT	-10.4482	6.1503	2.22967e-09	1.81215e-06		GTTCCGGGGG	8.09216	5.08059	1.08657e-10	1.29532e-07		GGTGAATTTAGGGACAGGTCTTCTAAACTTGTTTTA	10.1951	7.22081	3.35971e-08	2.39319e-05		GGTGAATTTAGGGACAGGTCTTCTAAACTTGTTTTGAGCTAG	-7.94548	6.57861	4.47044e-08	3.95603e-05		TGAAAGACATGGGCAGTGAGACG	7.05542	8.5043	1.22755e-09	1.10818e-06		TGAAAGACATGGGCAGTGAG	7.568	3.53064	1.01704e-11	9.99003e-09		TACCTCACATAATATCGTCAA	9.43572	6.18796	1.89283e-09	1.52135e-06		TTTGCACTTAGATACCTGACT	-7.31136
GCCCGGAACTGA	-11.2922	6.09855	3.91398e-13	3.65781e-10		GGAGAAGTTGTTGGTTGTGGAATCA	-8.10887	6.772	2.19231e-09	1.81215e-06		GCAGATTGTTGATTCCTTGGTGCTT	-10.9543	6.23264	1.26549e-10	1.39687e-07		ATAGGAAATGAATAAGGAGAGA	6.81006	11.4284	3.49634e-08	2.44168e-05		GGTGAATTTAGGGACAGGTCTTCTAAAA	-8.19393	6.78129	4.50451e-08	3.95603e-05		AAAGATCAGAGTTGTGTTTATGGG	10.1367	6.29598	1.52585e-09	1.29348e-06		ATGGACTAAAAGCAATTTCAGA	9.24668	3.57561	1.06307e-11	1.01953e-08		AAAGATCAGAGTTGTGTTTATGG	9.3999	6.15339	1.97833e-09	1.55889e-06		TATTATGCAAAGTAGAGTGC	-7.36492
GGGTTTCACGTCAAC	-9.47337	6.16677	4.2672e-13	3.91122e-10		GTAAGCATCAACAAACAATTTGACA	-10.4801	6.1817	2.66582e-09	2.12497e-06		GAAGAATAATCTGTGAAAGTCAAAG	-10.9253	6.20391	1.25774e-10	1.39687e-07		GACAGCAGGGCG	-8.07242	7.9314	3.7021e-08	2.53565e-05		TAGAATGAGGACACCATATCAAACCTGAGT	-8.9087	7.49442	4.55131e-08	3.95603e-05		GGCGGGGAGTTTG	-7.73836	7.52046	1.51497e-09	1.29348e-06		TAATTTTTATAACACAATCATA	9.40964	3.7293	1.09539e-11	1.03032e-08		GGTGAATTTAGGGACAGGTCTT	-9.27491	5.94407	2.27163e-09	1.75558e-06		TTTGAGACTAACGTTAGGGCTAA	-6.26557
ATGCACCGGATCCCGTCC	-10.7816	5.59623	4.63539e-13	4.00798e-10		GATTTATTTATTTTGTTAGTTGGGTT	-10.3803	6.08398	3.06219e-09	2.39486e-06		GGAATTTTGAGAGATGTTTAAGG	-10.9045	6.18327	1.24398e-10	1.39687e-07		TGGATGGGAGACCTCCTGGGAACC	-10.1437	7.20703	3.85401e-08	2.58989e-05		GGTGAATTTAGGGACAGGTCTTCTAAACTTGTTTTGAG	-9.81753	6.59083	4.44643e-08	3.95603e-05		GGAGAAGTTGTTGGTTGTGGAATCA	10.213	6.37158	1.57606e-09	1.31083e-06		AAAGATCAGAGTCGTGTTTATG	9.25293	5.23376	1.32195e-11	1.21996e-08		GGTGAATTTAGGGACAGGTCTTCTAAACTTGTTTTGAGCTAGTAACTCATTCACTTC	-5.86033	6.66443	2.60011e-09	1.97152e-06		GTATCCAATAGCTTTCGTTGTTTT	-7.60817
TTAGGGTTCGACTCCGGAG	-9.56934	6.26155	4.69255e-13	4.00798e-10		TACCCGTAGTCCACTGCTGTCA	6.43659	7.67763	3.29445e-09	2.5288e-06		AGAGGCAGG	8.76994	5.72743	1.20989e-10	1.39687e-07		TGATATGTACAGTTATTCTG	6.71367	9.37716	4.045e-08	2.6679e-05		TTTGGCACCATGGGACTCTAAT	-6.065	9.32979	4.76717e-08	4.06693e-05		TTTGCGACTGTATTCACATCACT	7.37092	8.43895	1.66857e-09	1.36208e-06		AAAAGAAAGATCAGAGTCGTG	9.12101	3.44797	1.52556e-11	1.38179e-08		AAAGATCAGAGTTGTGTTTATGGG	9.34336	6.10142	2.85876e-09	2.1275e-06		ATTGGAAGAAAAGAAAGATCAG	-8.0927
ACAGCGGGGAA	-8.76543	6.21748	4.79323e-13	4.00798e-10		ACAGCTCATTAAACTGCCTCT	5.87232	6.9206	3.41738e-09	2.57546e-06		GAAATCTTAACTATATCAGAGGCTG	-10.9529	6.23111	1.33032e-10	1.41598e-07		TGCACCGGATCCCGTCC	-7.12501	7.89031	4.56896e-08	2.95869e-05		GAAAGTCTTTCGGTTCCG	7.16471	8.27105	5.8286e-08	4.57652e-05		TTTGCGTACATATTTCTGAACCT	6.63655	7.9274	1.73845e-09	1.39332e-06		TTGCACATAGACTATTCTGA	9.08604	3.41274	1.79599e-11	1.59716e-08		GGTGAATTTAGGGACAGGTCTTCTAAACTTGTTTTGAGCTAGTAACTCA	-9.99541	10.0484	3.04966e-09	2.2283e-06		TTGTGACCGTTATAACGACTATTC	-7.67947
ATAGGAAATGAATAAGGAGAGA	8.48868	11.8746	4.70315e-13	4.00798e-10		GAGCAATATCATTTCTGTAGGAGGCT	-10.2737	5.98077	3.51041e-09	2.59833e-06		TCCCATGTAGTCTAGTGGTTATGATTTGCGGCTCC	-9.74392	6.97063	1.32531e-10	1.41598e-07		GCCCGTCGCTGCCCGGAACT	-6.36341	9.19431	4.7873e-08	3.04472e-05		GATAT	-5.83179	9.50017	5.72872e-08	4.57652e-05		TGGCAGTGTAGTTAGCTGGTT	7.34153	6.86494	1.88029e-09	1.45413e-06		CCGTCGGAGTCGGCTTT	9.06823	3.3948	1.88473e-11	1.64615e-08		GGTGAATTTAGGGACAGGTCTTCTAAACTTGTTTTGAG	-9.03163	5.70796	3.26109e-09	2.34024e-06		CATAAACACCACTCTGATCTA	-8.18352
GAATTTGTTGAAACTCCTTGAAACA	12.5702	7.94473	4.7281e-13	4.00798e-10		GTAAACTGTAGAAAGTGTTCCCACT	-10.3054	6.01149	4.44671e-09	2.98123e-06		TATTATGCCTGACTACAGAGTCT	-8.11643	7.33114	1.41124e-10	1.47576e-07		TGGCGGGGAGT	-7.18737	7.95055	4.91573e-08	3.07155e-05		TATAATTGAGGGTGATAT	-7.17503	7.0614	5.86122e-08	4.57652e-05		ATTCTTGGACCGTAGCGA	-6.93202	7.65656	1.87489e-09	1.45413e-06		GTTGTTGT	7.05393	3.73853	2.03181e-11	1.74347e-08		GGTGAATTTAGGGACAGGTCTTCTAAACTTGTTTTAA	-9.11134	5.78464	3.60834e-09	2.54401e-06		AGGTTGGAGAATGA	-7.94665
ACCCGCTGAACT	-10.7614	5.57696	5.03778e-13	4.06967e-10		GTACTTCAGAGTGTTTCTCGTCCGA	-10.2178	5.92663	4.19842e-09	2.98123e-06		GTACAACTTAAGTCTTTTTTCGGCA	-10.8758	6.15501	1.4992e-10	1.54071e-07		GGTGAATTTAGGGGCAG	9.89749	6.92803	5.03964e-08	3.09469e-05		TGATATGTCTGGTATTCTTGGG	-8.18379	11.6213	5.72099e-08	4.57652e-05		TGAAAGACGTTCTCTATCTCT	9.9787	6.13968	2.01309e-09	1.52999e-06		TAACCGGATATATCTGACTAC	6.37806	3.92123	2.16342e-11	1.80948e-08		GGTGAATTTAGGGACAGGTCTTCTAAACTTGTTTTGAGCTAG	-6.92057	5.70736	4.21137e-09	2.91797e-06		TTATCTAGTAAAAAATCTTTC	-10.6202
TTCGGTTCCGGGGGAAG	-8.95484	6.45689	5.00424e-13	4.06967e-10		AGAAGTTTGATTGCCATGAACA	-7.88676	6.53618	4.50691e-09	2.98123e-06		GATGGGAGACCTCCTG	9.86176	4.62969	1.61063e-10	1.62717e-07		CTTTCGGTTCCGGGG	-9.98874	7.05831	5.36125e-08	3.23638e-05		GGTGAATTTAGGGACAGGTCTTCTAAACTTGTTTTAAA	-9.8355	6.60952	5.49296e-08	4.57652e-05		TTTGCGACCAAACTTAGAT	9.94643	6.10779	2.46267e-09	1.82306e-06		AATGTTATCCGTTTGTTATCT	9.04671	3.37373	2.18272e-11	1.80948e-08		AAAGATCAGAGTCGTGTTTATGG	8.92772	5.71841	4.76882e-09	3.19407e-06		CGAATCCTGCTGACTGCGAATTGTTTT	-8.02603
ATCGGAATCGCCA	-7.68292	7.08265	5.8206e-13	4.62369e-10		TTGGCAGTGTAGTTAGCTGGTTG	6.8621	4.39139	4.4173e-09	2.98123e-06		GGGTTGAACTTGAGGATTGTGTACT	-10.9162	6.19468	1.65331e-10	1.64245e-07		AGCAGGGCGGT	-7.08826	7.85492	5.5051e-08	3.26783e-05		TTCCCCATATCTCCACCA	-7.91005	6.49662	5.99463e-08	4.60268e-05		GTTAAGAATAG	9.93015	6.0917	2.48142e-09	1.82306e-06		TGAGATCAAATTAAACTTATC	7.38195	3.34764	2.31977e-11	1.89103e-08		CGCAATGATGAAAAATGACCTCTGATT	5.77456	6.95166	4.7427e-09	3.19407e-06		GAATTTGTTGAAACTCCTTGAAACA	-10.7784
GCCCGTCGCTGCCCGGAACT	-9.35334	7.36493	6.12723e-13	4.78748e-10		GGGTTATTTTAAAACTTAGATTTGA	7.21513	9.54956	4.18881e-09	2.98123e-06		GAATAGTCTGGGTATGAAACTGGTGTT	-10.9302	6.20868	1.70446e-10	1.6655e-07		GCTGCCCGGAACTGAGC	-6.82912	8.51978	6.05634e-08	3.53611e-05		GGTGAATTTAGGGACAGGTCTTCTAAACTTGTTTTGAGCT	-7.87742	6.46496	7.22013e-08	5.45273e-05		TTTGCGACCCAATCCAGGCTA	7.12513	8.0747	2.52931e-09	1.82778e-06		TCGAATCCTGCCAGGATCGTTATCTTT	6.50252	3.70131	3.32357e-11	2.66491e-08		GGGCTTGATTGTCGTTTTGGTACACT	9.21715	5.98449	6.73724e-09	4.43224e-06		GGGCTTGATTGTCGTTTTGGTACACT	-10.794
AGTCTTTCGGTTCCGGGGGA	-9.4807	6.17421	6.52978e-13	5.01972e-10		CAAGAACTGGCACGGAC	8.53024	3.65175	4.33566e-09	2.98123e-06		GCATTGGATTTGGAAGTTTGTAAATC	-10.9268	6.20535	1.75499e-10	1.68722e-07		GCGGGTTTAAGTTAAGTTTAA	10.477	7.49901	6.80104e-08	3.90687e-05		TGGCCGTGTAGTTAGCTGGTTG	-7.97614	6.56363	8.00213e-08	5.94584e-05		ATTGGAAGAAAAGAAAGATCAG	9.94637	6.10774	2.66903e-09	1.89764e-06		TAAAGATGAAGTTTCGGATAT	8.97931	3.30458	3.51874e-11	2.77589e-08		GAATTTGTTGAAACTCCTTGAAACA	9.20294	5.97123	6.838e-09	4.43224e-06		TCGAGTCCCATCGGAATCGTCAACCTTT	-7.97437
CCGCCCGTCGCTGCCCG	-11.0303	5.83943	7.25938e-13	5.49201e-10		GGCAGTGTAGTTAGCTGGTTG	8.76779	3.8775	4.53118e-09	2.98123e-06		GAGACCTCCTGGGAACCGTT	9.87935	4.6463	1.80626e-10	1.70895e-07		TTCGGTTCCGGG	-7.8292	7.69494	7.89655e-08	4.46418e-05		GGTGAATTTAGGGACAGGTCTTCTAAACTTGTTTTGAGCTAGTAACTCA	-9.70365	10.8105	9.18499e-08	6.71641e-05		TTTGCGACAGTTGTTGGCTTA	7.066	7.32028	2.87692e-09	2.01297e-06		TTTGGGACCTGTGCTTAAGTTG	5.46974	4.98085	4.36564e-11	3.38933e-08		ATTGGAAGAAAAGAAAGATCAG	9.16266	5.93291	6.95472e-09	4.43634e-06		TTAAAGCTTAGATTAAACGTCT	-6.28976
ACAGCGGGGAAAG	-10.814	5.6276	7.42727e-13	5.53123e-10		GGTGAATTTAGGGACAGGTCTTCTAAA	5.20196	6.56673	4.8713e-09	3.15493e-06		GGAAGAAGTCTGGAGCCTGGAAACT	-10.8181	6.09752	1.86291e-10	1.7175e-07		GAAAGTCTTTCGGTTCCGGGGG	-6.44317	8.70928	8.20561e-08	4.50666e-05		ACAGCTCACTCAACTGCCATG	-7.9299	10.4471	9.37158e-08	6.74578e-05		GGGCTTGATTGTCGTTTTGGTACACT	10.0177	6.17824	3.02297e-09	2.0761e-06		TTCAAAAACATTTTCAGTAGTC	8.94991	3.28036	5.03531e-11	3.84815e-08		TTGAGATCAATGGGAATCTTCAAA	8.72356	5.53101	7.85048e-09	4.92949e-06		TGCTATGATAGATTTGTTATCCCTGTCTGAAC	-8.73259
GAGACCTCCTGGGAACC	-10.6635	5.48125	7.88533e-13	5.78201e-10		TGGCAGTGTGGTTAGCTGGTTGT	5.92297	6.79239	5.53552e-09	3.52996e-06		GAGACCTCCTGGGAAC	9.89679	4.66277	1.87292e-10	1.7175e-07		GTCTTTCGGTTCCGGGGG	-7.0355	7.80328	8.22475e-08	4.50666e-05		ATTAAATTCGAATCTGACAATA	-6.48144	6.76602	9.99824e-08	7.08614e-05		GAATTTGTTGAAACTCCTTGAAACA	10.0021	6.16285	3.06133e-09	2.0761e-06		TTTCACAGTAGATTATTGGTA	8.94618	3.27731	5.73144e-11	4.31278e-08		GGTGAATTTAGGGACAGGTCTTCTAAACTTGTTTTAAA	-9.07798	5.75085	8.27947e-09	5.11888e-06		TTTGGCACTGTATAGGCTCCA	-6.6786
ACAGCGGGGAAA	-8.57507	6.59578	8.02305e-13	5.79386e-10		GGTGAATTTAGGGACAGGTCTTCTAA	5.52408	5.4793	5.65073e-09	3.54883e-06		GAATGACCTTACAAGAACGTGCCA	-10.8678	6.1467	1.90609e-10	1.72143e-07		GATGTCCGGGGCTGCACGCGCGCT	-9.97916	7.04877	8.41598e-08	4.54157e-05		GAGAGGAACCGTTAG	6.39458	8.08266	1.0352e-07	7.22573e-05		TTGAGATCAATGGGAATCTTCAA	7.3192	6.89399	3.34837e-09	2.23636e-06		TTTGGGAACATGTTCAGAACCTTA	7.25733	3.22969	6.1522e-11	4.55925e-08		ATATTTGAAACTTCATCTTTG	8.78292	5.5828	8.56976e-09	5.21807e-06		TCGAATCGTCTAGAAGTTAATTT	-6.43185
TGCACCGGATCCCGTCC	-8.57407	6.08034	9.03103e-13	6.42443e-10		GAAATCTTAACTATATCAGAGGCTG	-10.1581	5.86879	5.99356e-09	3.60048e-06		GAACATGTCAACTAAATATGAACTACT	-10.9251	6.20398	2.0287e-10	1.75323e-07		GGTGAATTTAGGGCCAGG	9.81744	6.84923	8.66296e-08	4.55858e-05		TCATT	-7.90812	6.49307	1.07061e-07	7.3613e-05		TTATCTAGTAAAAAATCTTTC	9.84528	6.0079	3.58921e-09	2.33602e-06		CAAAAACATTTTCAGTAGTCA	8.96182	3.29368	6.57493e-11	4.7998e-08		ATGTAATTTTTTCACCTGTCT	8.6957	5.50535	8.88392e-09	5.32863e-06		TGAGATTCTCTTTTCTTCATTCAA	-10.5394
GTCTTTCGGTTCCGGGGGA	-9.04614	6.54201	1.00875e-12	7.07044e-10		GAAGAATAATCTGTGAAAGTCAAAG	-10.1325	5.84417	5.94907e-09	3.60048e-06		GTGCGGTGATTAAGAGAATTTCTGAGCTTA	-8.41726	8.83511	2.02954e-10	1.75323e-07		TTCGGTTCCGGGGGAAG	-6.93818	8.24086	8.8286e-08	4.55858e-05		TTTGGAGGCTCTCCTTCGGGGGAGCGAT	-6.72279	8.03265	1.09166e-07	7.39571e-05		AGTCTTTCGGTTCCGGGGGA	-8.31459	7.21486	3.60358e-09	2.33602e-06		AGGGTTTCACGTCA	6.61545	3.85146	7.06728e-11	5.08335e-08		TATTCTGAAATTGTTTTTAATC	8.68368	5.49545	1.06694e-08	6.30548e-06		TGAGATCATGCCAGTGTCATTT	-6.20551
GAAAGTCTTTCGGTTCCGGGGGAAG	-9.15854	5.8575	1.12477e-12	7.65839e-10		GGTGAATTTAGGGCCAGGTCTTCTAAACTTGTTTTGAGCTAGTAACTCA	8.47834	3.60202	5.92643e-09	3.60048e-06		AAAGTGTTGTT	10.0881	4.84411	2.02256e-10	1.75323e-07		TCTTGGACCGTAGCGA	-7.53256	8.29843	8.83149e-08	4.55858e-05		TTTGGAATGAAGCTAGAAATAGCTTCTAAT	-6.18794	8.13455	1.22674e-07	8.0735e-05		TCGGTTCCGGGGGAAGT	-6.58919	7.8776	3.71154e-09	2.33727e-06		TCGAGTCCCATCGGAATCGTCAACCTTT	5.64606	4.54523	7.60844e-11	5.36584e-08		GGTGAATTTAGGGACAGGTCTTCTAAACTTGTTTTGAGCT	-8.92074	5.59851	1.12978e-08	6.52576e-06		AAAGATCAGAGTCGTGTTTATGGG	-7.89075
AGGACGTGAAACC	-8.40821	6.43603	1.11037e-12	7.65839e-10		GGAATTTTGAGAGATGTTTAAGG	-10.1135	5.82567	6.28018e-09	3.71876e-06		GTTTTAGACAACAATTTAGATCCACA	-10.7748	6.0548	2.10356e-10	1.79121e-07		TCCCTGAGATTTCATATAACCG	9.85822	6.88919	9.68276e-08	4.63568e-05		TTTGGAATGAAGCTAGAAATAGCTTCTAA	-7.11702	9.01838	1.22676e-07	8.0735e-05		GAAAGTCTTTCGGTTCCGGGGGAAG	-7.96579	6.8774	3.69802e-09	2.33727e-06		CCGTCGGAGTCGGCTT	6.18462	4.00515	7.67944e-11	5.36584e-08		GGTGAATTTAGGGACAGGTCTTCTAAAA	-9.26784	5.93479	1.13669e-08	6.52576e-06		TTGCACGATTTACATACTCACA	-6.24439
GCTGCCCGGAAC	-8.65397	6.10829	1.16592e-12	7.82675e-10		GCAGATTGTTGATTCCTTGGTGCTT	-10.1669	5.87731	6.73486e-09	3.93183e-06		GCATTGACGATTTTCTTGTAGACTATT	-8.77594	6.01002	2.22182e-10	1.86527e-07		GGTGAATTTAGGGACAGGTCTTCTAAACTTGTTTTGA	7.63901	6.72012	9.42912e-08	4.63568e-05		GGTGAATTTAGGGTCAG	-9.58485	6.35819	1.31414e-07	8.50298e-05		TTTGCGTACATATTTCTGAACCTCC	6.95693	7.70904	3.81997e-09	2.37166e-06		TTTGCGTACATATCTCTGAACCTC	6.35429	3.5555	8.14219e-11	5.60905e-08		TTATCTAGTAAAAAATCTTTC	9.06975	5.84651	1.23683e-08	7.00064e-06		TCCCATGTAGTCTAGTGGTTATGATTTGCGGCTCC	-8.77058
TACGTCCCTGCCCTTTGTACAC	-9.58628	6.27889	1.21109e-12	8.01705e-10		GAATAGTCTGGGTATGAAACTGGTGTT	-10.1346	5.84612	7.31554e-09	4.21152e-06		TGGGAACCGTTAGTGGC	9.78415	4.55655	2.31417e-10	1.91581e-07		TTTGCGACATACTCAGATCAG	7.13768	9.15823	9.1962e-08	4.63568e-05		GGTGAATTTAGGGACAGGTCTTCTAAACTTA	-9.6154	6.38904	1.32894e-07	8.50298e-05		TTTGCACTTAGATACCTGACT	6.95829	7.1296	3.87466e-09	2.3722e-06		TCATTTTATGATTGCGTTATA	8.82018	3.15203	9.2603e-11	6.20724e-08		GGAGAAGTTGTTGGTTGTGGAATCA	6.75035	6.17477	1.34773e-08	7.52241e-06		TTTCGGTTGACTCAAAATATCCTTGCTGATTTTGT	-7.70709
ATTCTTGGACCGTAGCGAGACGTCCT	-8.50806	6.0154	1.26244e-12	8.24251e-10		GCATTGGATTTGGAAGTTTGTAAATC	-10.1311	5.84269	7.46709e-09	4.23988e-06		GTAGCGAGACGTCCT	7.34536	6.04358	2.38477e-10	1.94721e-07		TCGGTTCCGGGGGAA	-6.45023	8.46108	9.7618e-08	4.63568e-05		ATAGGTTGGAGAATG	-7.80429	6.39198	1.3484e-07	8.50932e-05		CATTATGTCGATACAACTTGAACTGAGCT	6.92073	6.80891	4.1409e-09	2.50048e-06		TTTGAAACTTCATCTTTGTAGA	8.86387	3.18747	9.26435e-11	6.20724e-08		TATCCATAAACACCACTCTGA	8.59846	5.41697	1.5685e-08	8.51488e-06		TATATCCATAAACACCACTCTG	-6.3929
TTTCGGTTCCGGGGGAAGTA	-10.613	5.43223	1.34992e-12	8.69455e-10		GGGTTGAACTTGAGGATTGTGTACT	-10.1232	5.83478	7.68967e-09	4.24982e-06		GAAACTGGATAAGGTGCTTAATGTAG	-10.7489	6.02916	2.44813e-10	1.97193e-07		TTTCGGTTCCGGGGGAAGT	-6.57584	9.06332	9.37302e-08	4.63568e-05		GAGACCTCCTGG	7.37437	7.58521	1.43978e-07	8.5569e-05		TGACAGCAGGGCG	-7.50134	7.29052	4.3411e-09	2.58595e-06		TGGCAGTGTAGTTCGCTGGTTG	8.76734	3.09684	9.59985e-11	6.26051e-08		TATATTTGAAACTTCATCTTTG	8.5798	5.40073	1.59868e-08	8.51488e-06		TTTGCGACTGTATTCAAAACCC	-7.38946
AGTACTCCGGAGA	-10.5638	5.38332	1.4336e-12	9.11045e-10		GTACAACTTAAGTCTTTTTTCGGCA	-10.0863	5.79962	7.67314e-09	4.24982e-06		TGTTTGAACCGGGCA	6.22111	6.0793	2.5119e-10	1.99632e-07		GTTGTTTGAACCGGGCA	-6.67187	8.37552	9.66193e-08	4.63568e-05		TTGGACCGTAGCG	6.48036	7.61197	1.46176e-07	8.5569e-05		TACGTCCCTGCCCTTTG	-7.99994	6.91035	4.54639e-09	2.67213e-06		TGGTTCCGGCC	8.76734	3.09684	9.58654e-11	6.26051e-08		TTTGGCACCATGGGACTCTAAT	-6.78886	8.45145	1.58479e-08	8.51488e-06		TGACTAGAACATTACTTTGAAA	-8.90115
ACTGGGGCGGTA	-10.5423	5.36246	1.50537e-12	9.44063e-10		AGAACTGGCACGGACA	5.44833	4.94248	8.15472e-09	4.44754e-06		GTCATCATAGGCCAAGTAGTACAAT	-10.7461	6.02636	2.59733e-10	2.01284e-07		GGTGAATTTAGGGACAGGTCTTCTAAACTTGTTTTGAGCTAGTA	7.67234	6.67608	1.04509e-07	4.89764e-05		CCA	-5.26909	9.79873	1.41915e-07	8.5569e-05		CGCAATGATGAAAAATGACCTCTGATT	7.19756	7.17599	4.86373e-09	2.82103e-06		TTTGTAATTGGAAGAAAAGAA	7.22461	3.19995	1.05701e-10	6.80254e-08		GGTGAATTTAGGGACAGGTCTTCTAAACTTGTTTTGAGCTAGTAACTCATTCACTT	-6.82687	5.57924	1.6103e-08	8.51488e-06		TAAATATGAATGTGAATGTTAT	-6.23324
CGTAGCGAGACGTCC	-10.6913	5.50741	1.67871e-12	1.03621e-09		TAAAATCGTGTCGAT	8.36124	3.49133	8.49478e-09	4.57284e-06		GTTAAGAAGCTTAATATCGTTATGACT	-8.78075	6.01463	2.60021e-10	2.01284e-07		CGGTTCCGGGGG	-6.75943	8.07623	1.1504e-07	5.32113e-05		TGGCAGTGTGGTTAGCTGGTTGT	-5.5011	8.90089	1.46739e-07	8.5569e-05		TCGAGTCCCATCGGAATCGTCAACCTTT	9.80079	5.96402	5.43189e-09	3.10965e-06		AGGGGCG	6.54071	3.77695	1.12525e-10	7.14768e-08		TAAGGCACAATATTGGCATCTCT	-4.35306	9.61857	1.63545e-08	8.53557e-06		AAGATGAAGTTTCGGATATAG	-7.04157
GTACTCCGGAGAGA	-10.5373	5.35743	1.69578e-12	1.03621e-09		GGAAGAAGTCTGGAGCCTGGAAACT	-10.0256	5.74076	8.9079e-09	4.73375e-06		GAGAACCCTCCCACACTGATCGACA	-10.8535	6.13281	2.6576e-10	2.0306e-07		ACTTGGATGGGAGACCTCCTGGGAACCGTTAGT	-9.94354	7.01446	1.19142e-07	5.44021e-05		ATCATT	-5.51363	8.46139	1.3973e-07	8.5569e-05		TTGGGACCTGTGTTTAAGTTG	6.04438	10.3064	5.53361e-09	3.12727e-06		TGGACCGTAGC	6.30776	3.50892	1.14367e-10	7.17155e-08		GTAATTGTGGATTCATTTGAGGAAA	8.59729	5.41802	1.87444e-08	9.53521e-06		TTTTGTATTGCTGAATTTTTGCTC	-6.13759
GGTTTCACGTCAAC	-10.637	5.45442	1.90728e-12	1.15069e-09		GAATGACCTTACAAGAACGTGCCA	-10.0769	5.79009	9.32558e-09	4.89298e-06		TGGCTTGGATCTATCTGCAAACA	-6.68145	10.4131	2.6913e-10	2.0306e-07		TAGGGTTCGACTCCGGAGAGGGA	-9.71404	6.7961	1.23631e-07	5.57371e-05		TTAAGTAGTAGTGCCGCAGGTT	-5.74981	7.84078	1.43356e-07	8.5569e-05		CTCCGGAGAGAG	-7.06683	8.55853	6.14895e-09	3.43103e-06		GGGTTTCACGTCA	6.28816	3.49261	1.20825e-10	7.48059e-08		GGTGAATTTAGGGACAGGTCTTCTAAAC	-6.66082	6.20446	1.85181e-08	9.53521e-06		TGAGGTAGTGTTAAATATTGT	-8.60803
GGGCTTGATTGTCGTTTTGGTACACT	12.3274	7.703	2.14415e-12	1.27743e-09		GGGTTATTTTAAAGCTTAGATTTGAA	7.2938	4.00089	9.62733e-09	4.98816e-06		TTTGGCACTGTATAGGCTCCA	-7.50926	9.56382	2.85616e-10	2.12806e-07		TCTATATGTTGAGAATACTTTCTGAACT	6.27571	8.73153	1.28573e-07	5.72405e-05		GATC	-6.89349	7.86631	1.56829e-07	9.03102e-05		TTTGCACTTAGATACCTGACTAC	5.79253	10.3809	6.35796e-09	3.50332e-06		TATAAAGATGAAGTTTCGGATA	8.71812	3.04848	1.34341e-10	8.21342e-08		GGGTTATTTTAAAACTTAGATTTA	-6.9687	6.54005	2.21719e-08	1.11378e-05		ATATTTGAAACTTCATCTTTG	-10.3196
GTCTTTCGGTTCCGGG	-9.10675	5.80667	2.25343e-12	1.32597e-09		GAACATGTCAACTAAATATGAACTACT	-10.138	5.84981	1.00806e-08	5.15855e-06		CTCCTGGGAACC	9.79829	4.56987	3.00942e-10	2.21456e-07		CCGCCCGTCGCTGCCCGGAACT	-6.91323	9.89073	1.3421e-07	5.90126e-05		TCGAATCCCACTCTCGTCACC	-6.06371	7.82363	1.66134e-07	9.22103e-05		TTGCGTACATATTTCTGAACCTCC	6.82158	7.07874	6.56485e-09	3.57266e-06		TGTATTTTAACATCTTTCTTA	8.76599	3.09135	1.39015e-10	8.39426e-08		AAAGATCAGAGTCGTGTTTATGGG	8.93103	5.71978	2.43292e-08	1.19532e-05		TCACCGGGTATACATTCATC	-7.09603
TTAGGGTTCGACTCCGGAGA	-9.16476	5.86372	2.47923e-12	1.44104e-09		GTTTTAGACAACAATTTAGATCCACA	-9.98371	5.70059	1.05744e-08	5.29148e-06		GTTGACTTGAACTGTTGTGGTAACT	-10.7207	6.00098	3.13667e-10	2.22576e-07		GTTCCGGGGGAAGT	-6.80719	7.58318	1.37217e-07	5.95988e-05		ATCGCTTCTCGAGCTTTTTAGCTCAGATCAAAGTGTAGTA	-6.07981	6.91268	1.65942e-07	9.22103e-05		TGATATGTCTGGTATTCTTGGGA	9.69822	5.86291	6.85809e-09	3.68672e-06		ATCTTTGTAGATGTATTTTAA	8.76867	3.10226	1.46535e-10	8.74047e-08		TCACCGGGTATACATTCATCA	5.53231	6.76559	2.44009e-08	1.19532e-05		TAATACTGCCTTAGACGGCTAA	-7.17942
GTAATTGTGGATTCATTTGAGGAAA	12.0841	7.46102	3.18732e-12	1.83029e-09		GCGTTGATGGTTAAGTGGTATAATTCTC	-7.84067	6.49029	1.07234e-08	5.29148e-06		GTCTTCATATTTTGAGTCGCGCGAA	-10.6667	5.94765	3.11627e-10	2.22576e-07		ATCTGTTGGGCTCTGCC	-6.3717	8.39227	1.42005e-07	6.04943e-05		GGTGAATTTAGGGACAGGTCTTCTAAACTTGTTT	-9.83298	6.60813	1.64784e-07	9.22103e-05		AAAGATCAGAGTCGTGTTTATGGG	9.7174	5.8818	7.01979e-09	3.71183e-06		TTTGTAATTGGAAGAAAAGAAA	7.07704	3.00562	1.49125e-10	8.7878e-08		GGTGAATTTAGGGTCAG	-8.82573	5.50569	2.46874e-08	1.19532e-05		GTAGAATGAGGACACCATATCAAACCTGAGT	-8.41788
GGGTTTCACGTC	-8.27813	5.79033	3.27523e-12	1.85838e-09		TGGCAGTGTAGTTAGCTGGTTGA	5.01307	7.99705	1.06881e-08	5.29148e-06		TTTGAACCGGGCA	7.16763	4.96723	3.09921e-10	2.22576e-07		GTGATGCCCTTAGATGTCCGG	-7.66495	7.53633	1.42675e-07	6.04943e-05		TTTGCGTGTGGGAGGGATGCGTTCGCGCACTCTCCCGA	-6.39366	6.96171	1.74527e-07	9.57154e-05		GTATCCAATAGCTTTCGTTGTTTT	6.56798	6.78746	7.0732e-09	3.71183e-06		TGATATGTCTGGTCTTCTTGGGT	5.22485	4.90196	1.70164e-10	9.84466e-08		TGGCAGTGTGGTTGGCTGGTTG	-4.86235	8.42179	2.56158e-08	1.2255e-05		AAAGATCAGAGTCGTGTTTATGG	-8.70693
ACACACCGCCCGTCGCT	-10.6814	5.49749	3.76135e-12	2.1091e-09		GGTGAATTTAGGGACAGGTCTTCTAAACTTGTTTTAA	5.53055	4.60262	1.13268e-08	5.52348e-06		GTGAACTGTATGGCGATGTTTAACA	-10.689	5.96991	3.24062e-10	2.27248e-07		CCCGGAACTGAGC	-6.71569	8.40956	1.44784e-07	6.06664e-05		TGGCAGTGTAGTTAGCTGGTTGAT	-6.80114	6.20191	2.07417e-07	0.000112415		TCGGAAACGAAAGTCTTTCGGTTCCGGGGGAAGT	-9.87716	6.10257	7.29105e-09	3.78114e-06		CGAATCCTGCCAGGATCGTTATCTTT	6.63961	3.37412	1.71085e-10	9.84466e-08		GGTTTTAACTCAAGTAATCTGGACA	8.51356	5.34274	2.62503e-08	1.24108e-05		TTTGCGACTAAACCTAGATCAA	-5.87812
TTCGGTTCCGGGGGAA	-8.89363	5.59859	3.90965e-12	2.16676e-09		GAGAACCCTCCCACACTGATCGACA	-10.0586	5.77291	1.15612e-08	5.57225e-06		GGTGAAATTCTTGGACCGTAGCGAGACGTCCTAC	7.15994	5.43031	3.4841e-10	2.38894e-07		ACACCGCCCGTCGCT	-6.83008	8.52013	1.4822e-07	6.11906e-05		AACAGCTCATTAAACTGCCTCT	-5.30372	9.64516	2.12378e-07	0.000113766		TTCACCGGGTAGACAAACGCG	-7.33	7.12407	7.76206e-09	3.9786e-06		CCGGAGAG	6.66374	3.3558	1.81982e-10	1.03499e-07		ACTGT	-4.41423	7.59013	2.82931e-08	1.32211e-05		ATGTAATTTTTTCACCTGTCT	-8.44793
CTTTCGGTTCCGGGGGAAGTA	-10.2696	5.09762	4.00171e-12	2.16738e-09		GAAACTGGATAAGGTGCTTAATGTAG	-9.96067	5.67828	1.30854e-08	6.16351e-06		GCGACGTGG	8.31369	5.28618	3.48687e-10	2.38894e-07		GGCGGGGAGTTT	-9.68286	6.76635	1.49472e-07	6.11906e-05		GTCTTACGCTCATA	-6.51831	9.528	2.17894e-07	0.000115379		TTTGAGACTAACGTTAGGGCTAA	7.63017	9.40297	9.08309e-09	4.60221e-06		TCAGAGTCGTGTTTATGGGTA	7.07106	2.99597	1.85241e-10	1.04142e-07		GGTGAATTTAGGGACAGGTCTTCTAAACTTA	-8.86483	5.54278	3.0408e-08	1.4046e-05		GAGGAATTGATTCTTTCCCAAATCGTC	-7.65592
GAAAGTCTTTCGGTTCCGGGGGAAGTA	-9.13982	5.84085	3.99123e-12	2.16738e-09		CTCCGGAGAG	6.32106	4.32108	1.30205e-08	6.16351e-06		GAATCCGACTGTCTAAT	7.10621	5.47556	3.56662e-10	2.41582e-07		GTGAGCTGGGTTTAG	-6.87248	7.64571	1.53276e-07	6.20348e-05		ACATATGATGATAAAATCCCCACGGAATTTCGATAATGACCAGTGATTAGTCTTGCTGATGTC	-5.85304	8.51151	2.32469e-07	0.000121697		TGAGGTAGTGTTAAATATTGT	9.66878	5.83392	1.03068e-08	4.9927e-06		GGGGATATAGCTCAGTGGTAGAGCA	-7.42216	8.46363	1.92129e-10	1.05587e-07		GGGCTTGATTGTCGTTTTGGTACA	8.62509	5.44477	3.44215e-08	1.57193e-05		AGGTTGGAG	-7.68392
TACGTCCCTGCCCTTTGTACA	-9.52014	7.01461	4.15793e-12	2.20195e-09		GTCATCATAGGCCAAGTAGTACAAT	-9.95809	5.67572	1.39481e-08	6.49606e-06		AAAGTCTTTCGGTTCCGGGGGAAGTATG	7.86962	4.8693	3.65228e-10	2.44604e-07		TTTGCGACTGTATCCAAAACCCGA	7.39167	7.23784	1.58846e-07	6.28607e-05		GAGCTATGATGTAACTATAATGAGCCTGATCTATTTGATGTGAATTCCGCTTCTGAGCTCT	-5.36669	8.99651	2.43395e-07	0.000124641		TTTGCGACTGTATCCACATC	7.56371	8.45066	1.00428e-08	4.9927e-06		GGTTCCGGCC	6.20923	3.41137	1.90026e-10	1.05587e-07		TGAGGTAGTGTTAAATATTGT	8.87231	5.66685	3.56024e-08	1.60759e-05		CGAATCCTGCCAGGATCGTTACCTTT	-10.2316
GGTTCCATGGTGTAGCGGTTAGCACTCAG	9.82395	8.90599	4.12383e-12	2.20195e-09		AGGGTTTCACGTCA	6.14596	4.194	1.47432e-08	6.79008e-06		GAAGTTGTTTTATCTCTGTAGTTAATT	-10.627	5.90854	3.84084e-10	2.54374e-07		CGGTTCCGGGGGA	-5.94718	9.19982	1.57809e-07	6.28607e-05		TGGCAGTGTAGTTAGCTGGTTGATGATGCAGAAAATCAACAGCTTACCAAATTGCCATC	-6.63918	6.03951	2.43502e-07	0.000124641		CCGCCCGTCGCTGCCCGGAACT	-6.83907	9.09109	1.02891e-08	4.9927e-06		TAACCGGATATATCTGACTACAG	6.0132	3.59916	2.08053e-10	1.11827e-07		TGATGTAATTTTTTCACCTGTC	8.4114	5.25014	3.78292e-08	1.68916e-05		ATATAGGTTGGAGA	-10.2316
TGGACCGTAGCGAGACGTCCT	-8.95985	5.66289	4.38925e-12	2.29891e-09		GTTGACTTGAACTGTTGTGGTAACT	-9.92786	5.6464	1.54423e-08	7.03389e-06		AAGGGAAGTCGGCA	6.68307	5.41771	3.95429e-10	2.5901e-07		TCCCTGAGATTTCATATAACCGGAG	10.0524	7.07985	1.66362e-07	6.48963e-05		AAAGTCTTTCGGTTCCGGGGGAAGTATG	9.97711	6.84938	2.56794e-07	0.000126628		AAGTCTTTCGGTTCCGGGGGAAGT	-9.66297	5.8954	1.01108e-08	4.9927e-06		ATCATTTTATGATTGCGTTATA	8.63876	2.97116	2.08056e-10	1.11827e-07		TGGCAGTGTGGTTAGCTGGTTGT	-4.74579	8.03462	3.85365e-08	1.70183e-05		TTGAGATCAATGGGAATCTTCAAA	-10.2881
CTGGCACGGAC	-10.2655	5.09395	4.46671e-12	2.31405e-09		GTCTTCATATTTTGAGTCGCGCGAA	-9.87663	5.59731	1.59764e-08	7.12227e-06		GGGCTTGATTGTCGTTTTGGTACAAA	-10.9247	6.20299	4.07136e-10	2.6378e-07		CTTTCGGTTCCGGGGGAA	-6.33287	8.3543	1.71278e-07	6.48963e-05		AAGTCTTTCGGTTCCG	9.96066	6.83389	2.58381e-07	0.000126628		TGAGATCAATGGGAATCTTCAA	6.62497	6.80159	1.04726e-08	5.01785e-06		GGAAGTCGGAACCC	6.61994	3.35184	2.11018e-10	1.12186e-07		TGGCAGTGTAGTTAGCTGGTTGATGATGCAGAAAATCAACAGCTTACCAAATTGCCATC	-8.45211	5.1508	4.01423e-08	1.75347e-05		TGAATCCTGTGACCCGAGTGCAAATCTCGGTGGTGCCTCCA	-8.68837
AGACCTCCTGGGAACC	-10.3416	5.16684	4.59451e-12	2.32961e-09		AATGGCACCTTTGGACGTGTGCG	5.8255	3.8073	1.598e-08	7.12227e-06		GCCAATTGATCGTCATCTGTGTAGA	-10.5587	5.84099	4.64028e-10	2.95109e-07		TCACCGGGTGAACGAATTCTC	-9.18174	9.92844	1.67967e-07	6.48963e-05		GCGGGT	-5.9567	6.79163	2.54233e-07	0.000126628		ATATTTGAAACTTCATCTTTG	9.54553	5.71265	1.08188e-08	5.128e-06		TTCGGTTCCGGGGGAA	7.02057	2.99893	2.22375e-10	1.15708e-07		TTTGGCACCATGGGACTCTAA	-5.71687	6.93555	4.07367e-08	1.76031e-05		TTTGCAACTTCATCCATTGCACA	-10.1966
TTTCGGTTCCGGGGG	-10.2461	5.07503	4.5533e-12	2.32961e-09		TAAGGCACAATATCGGCATCTCT	8.1915	3.33363	1.61678e-08	7.12932e-06		GGCGACGTGG	6.11906	6.10774	4.65393e-10	2.95109e-07		GGGTTCGATTCCCGATAAACGCACCA	-9.79342	6.87107	1.71103e-07	6.48963e-05		GGGTTATTTTAAAACTTAGATTTAAA	-7.98708	6.56935	2.502e-07	0.000126628		TTTGCGACCAAACTTAGATCAA	5.88241	8.56669	1.10629e-08	5.18789e-06		CACTTCGTCCTGAAAAGACAGG	8.61889	2.95046	2.21205e-10	1.15708e-07		GGTGAATTTAGGGACAGGTCTTCTAAACTTGTT	-8.4041	5.10573	4.91979e-08	2.10332e-05		GATTTCGAATGAACTGTATATTTTACTC	-10.3319
ACCGCCCGTCGCTGC	-10.5507	5.36992	5.16351e-12	2.58855e-09		GTCGCGATGGCCGAGCGGTCTAAGGC	-7.6258	7.16094	1.69661e-08	7.39027e-06		TGGTTCCGGCC	9.7609	4.53468	4.71205e-10	2.95649e-07		GGTGAATTTAGGGACAGGTCTTC	6.79693	7.49006	1.75927e-07	6.54612e-05		ACATATGATGATAAAATCCCCACGGAATTTCGATAATGACCAGTGATTAGTCTTGCTGATGT	-6.32988	6.89975	2.61419e-07	0.000126769		TTTGCGACCAAACTTAGATC	7.00655	6.53431	1.12978e-08	5.24229e-06		TAACCGGATATATCTGACTACA	5.59953	4.07445	2.51005e-10	1.28813e-07		GGGCTTGATTGTCGTTTTTGTACACT	8.36872	5.21359	5.58407e-08	2.36218e-05		TACTGGCCTTCAAACTTCTTAAC	-10.1968
AATTCTTGGACCGTAGCGAGACGTCCT	-10.266	5.09361	5.26813e-12	2.58855e-09		TACCCGTAGTCCAGTGCTGTC	5.50869	5.82948	1.71162e-08	7.39027e-06		GTAATTGTGGATTCATTTGAGGAAAA	-10.5537	5.83585	4.95795e-10	3.07837e-07		TCTTTCGGTTCCGGGGGA	-9.65559	6.74034	1.76445e-07	6.54612e-05		TTTTTGGAAGGCCGAGAGGCCTGA	-5.93622	6.77116	2.65976e-07	0.000127635		TAAGGCATTTTGAGGTTGTTC	7.13945	8.45004	1.19951e-08	5.42435e-06		TTTATAAAGATGAAGTTTCGGA	8.6098	2.9433	2.52827e-10	1.28813e-07		TAAGCTCGTAGCTACAGGTTT	-4.56404	8.70545	6.05426e-08	2.5344e-05		GATTTCGAATGAACTGTATATTTTACT	-10.232
ATCTGTTGGGCTCTGCC	-8.18316	6.59247	5.25438e-12	2.58855e-09		GTGAACTGTATGGCGATGTTTAACA	-9.90168	5.62155	1.75815e-08	7.5073e-06		AAGGGTTTCACGTC	7.41059	5.14031	5.05935e-10	3.10894e-07		GCCCGTCGCTGCCCGGAACTGAGC	-7.66697	7.53748	1.83865e-07	6.75106e-05		CACTGT	-5.41468	8.44905	2.69811e-07	0.000128141		TACCCGTAATCCAATGCTGC	5.93365	8.14083	1.20588e-08	5.42435e-06		TTTGCGACCAAACTTAGATC	5.20268	5.12331	2.57636e-10	1.29446e-07		TACTGGCCTTCAAACTTCTT	4.54263	7.53011	6.49115e-08	2.68928e-05		TTAAAGCTTAGATCAAACGTCT	-6.18937
TAGGGTTCGACTCCGGAG	-9.15739	5.85695	5.54033e-12	2.69452e-09		TACCCGTAGTCCATTGCTGTCA	6.63446	7.75899	1.77495e-08	7.5073e-06		GCCCGTCGC	7.9909	4.9857	5.16513e-10	3.10983e-07		TTAGGGTTCGACTCCGGAGA	-7.82691	7.70519	1.88005e-07	6.83264e-05		TAAGGCACAATATTGGCATCTC	-5.75734	7.40631	3.01644e-07	0.000140241		ATTCTTGGACCGTAGCGAGACGTCCTAC	-6.30819	7.35522	1.20593e-08	5.42435e-06		GGGCGGT	5.63553	4.2316	2.59363e-10	1.29446e-07		TGAAAGACGTTCTATATCT	4.83812	6.85224	6.76269e-08	2.77319e-05		TTCGATGATGTTATCTGCTTAGCAATTCCGAATATATTTGAGGAAAATGCCGCTTACTGAGTT	-6.7015
TTTCGGTTCCGGG	-10.1837	5.01456	5.67426e-12	2.73179e-09		GGGCTTGATTGTCGTTTTGGTACAAA	-10.1387	5.84962	1.85582e-08	7.77009e-06		CTCCGGAGAGAG	9.69723	4.4749	5.14828e-10	3.10983e-07		GTCTTTCGGTTCCGGGGGA	-6.35346	8.37422	1.97523e-07	7.10604e-05		GACATATGATGATAAAATCCCCACGGAATTTCGATAATGACCAGTGATTAGTCTTGCTGATGTCC	-6.78695	6.63944	3.04421e-07	0.000140241		AAAGATCAGAGTCGTGTTTATGG	9.73614	5.90029	1.23184e-08	5.45487e-06		GGCGAGATGGCCGAGCGGTCTAAGGC	-6.76065	10.965	2.73655e-10	1.32522e-07		GGTGAATTTAGGGACAGGTCTTCA	-8.31096	5.01753	7.59508e-08	3.08307e-05		TATTCTGAAATTGTTTTTAATC	-10.255
GCCCGTCGCTGCCCGGAACTGAGC	-7.72435	5.71387	6.2465e-12	2.97721e-09		AATGGCACCTTTGTACGTGTGC	6.83857	3.57173	1.97657e-08	8.19287e-06		GAATTAATATCATTTATCGTGGATG	-10.6892	5.97043	5.35345e-10	3.16028e-07		GGGTTATTTTAAAACTTAGATTTA	10.0277	7.05551	2.00205e-07	7.12951e-05		GAAATATATATATAGGTTG	-7.45196	7.29868	3.04324e-07	0.000140241		TTGTGACCGTTATAACGACTATTC	6.94983	6.52949	1.23747e-08	5.45487e-06		TTAAGTAGTTGTGTCGTAGGTCG	6.63955	3.37787	2.68546e-10	1.32522e-07		TGGCAGTGTAGTTCGCTGGTTG	-4.46599	8.78867	7.87281e-08	3.16384e-05		GAATCCTGTGACCCGAGTGCAAATCTCGGTGGTGCCTCCA	-7.6814
AACAGCGGGGAAA	-10.1583	4.98976	6.52949e-12	3.08127e-09		TCCCATGTAGTCTAGTGGTTATGATTTGCGGCTCC	-7.94212	6.6108	2.09414e-08	8.59426e-06		AGACCTCCTGGGAACC	9.74102	4.51601	5.35498e-10	3.16028e-07		GGTGAATTTAGGGACAGGTCTTCTAAACTTGTTTTGAGCTAGTAACTCATA	7.53414	6.61899	2.02179e-07	7.12951e-05		TGGAATGAAGCTAGAAATAGCTTCTAA	-6.01702	6.85026	3.08215e-07	0.000140583		GTCTTTCGGTTCCGGGGGA	-6.28168	7.57827	1.29551e-08	5.65422e-06		AAAAACATTTTCAGTAGTCAA	8.58951	2.92219	2.72396e-10	1.32522e-07		TGGCAGTGTAGTTAGCTGGTTG	-4.44388	14.6429	7.96413e-08	3.16886e-05		TATATTTGAAACTTCATCTTTG	-8.30084
CGGTTCCGGGGG	-7.59612	6.27633	7.14788e-12	3.34002e-09		TTTGCGACTGGATTCAGGCCATT	5.49763	6.51765	2.162e-08	8.78577e-06		GAATCCGACTGTCTA	7.22392	5.06838	5.61944e-10	3.28385e-07		CACGTCGGGTTCACCA	-6.3863	8.87105	2.06113e-07	7.19698e-05		ATAT	-6.00857	7.36931	3.15001e-07	0.000140888		TTTGGGAACATGTCCAGAACCTT	8.26799	10.5613	1.37517e-08	5.94302e-06		TAAAGATGAAGTTTCGGATATA	8.58026	2.91495	2.85788e-10	1.37041e-07		TATATCCCAATGGTGATCAAG	8.2488	5.10653	8.53674e-08	3.36339e-05		AGAAGTTTGATTGCCATGAACA	-10.3106
GACAGCAGGGCG	-8.62177	6.13679	7.30914e-12	3.38222e-09		GGTGAATTTAGGGGCAGGTCTTCTAAACTTGTTTTGAGCTAGTAACTCA	8.21019	3.34832	2.34291e-08	9.42849e-06		GACAATCTCAGGGCCAGAGCTAAGG	-10.4908	5.7738	5.71567e-10	3.30765e-07		ACCGCCCGTCGCTGCCC	-6.59935	8.61354	2.09033e-07	7.20864e-05		ATAGGTTGGAGAATGA	-7.44641	6.08155	3.14418e-07	0.000140888		TTGAGATCAATGGGAATCTTCAAA	7.49628	5.68591	1.4398e-08	6.16191e-06		GCCCGTCGCT	5.93596	4.83889	3.0168e-10	1.43257e-07		GGGTTATTTTAAAACTTAGATTTAA	-8.63852	5.33754	9.07697e-08	3.54152e-05		GCCTGCCACGCGG	7.74588
TTCTTGGACCGTAGCGAGACGTCCTAC	-10.1501	4.98238	7.56446e-12	3.46671e-09		GCCAATTGATCGTCATCTGTGTAGA	-9.76918	5.49445	2.53583e-08	1.01068e-05		TGGACCGTAGCGAGAC	6.59531	6.11968	5.78445e-10	3.31527e-07		CGAGAGGCAGGAAGA	-9.42107	6.52	2.10495e-07	7.20864e-05		AAAGTGTTGTT	9.88699	6.76555	3.22638e-07	0.000142916		ATAGGAAATGAATAAGGAGAGAA	7.79118	10.4004	1.46572e-08	6.21253e-06		TGGGGCGGT	6.00466	3.21635	3.17991e-10	1.4955e-07		TCCCATGTAGTCTAGTGGTTATGATTTGCGGCTCC	6.3434	5.80003	9.94613e-08	3.84332e-05		TTTGCGACTGTATCCAAACTACG	-6.08314
AGCAGGGCGGT	-8.02916	6.05953	7.88331e-12	3.57842e-09		GAATTAATATCATTTATCGTGGATG	-9.90053	5.621	2.62825e-08	1.03488e-05		AAGTCTTTCGGTTCCG	7.062	4.85999	5.92842e-10	3.36542e-07		GGTGAATTTAGGGACAGGTCTTAAA	9.4769	6.5159	2.18683e-07	7.21167e-05		TGGCAGTGTAGTTAGCTGGTTGA	-5.39054	10.0753	3.54138e-07	0.000152113		GATTTCGAATGAACTGTATATTTTACTC	7.53992	5.72825	1.52678e-08	6.4097e-06		AATGGCACCTTTGCACGTGTGC	6.91481	2.8909	3.37875e-10	1.57389e-07		ATTTTTGGAAGGCCGAGAGGCCTGA	-4.14822	7.99088	1.00985e-07	3.86504e-05		CGGTGAAGAAGAGAATCTGACT	-6.20083
AAACAGCGGGGAAA	-10.1144	4.94716	8.12554e-12	3.65358e-09		GTAATTGTGGATTCATTTGAGGAAAA	-9.76354	5.48872	2.64648e-08	1.03488e-05		AGTAGTAGAGC	9.48855	4.28003	6.01347e-10	3.3815e-07		ATCGGAATCGCCA	-6.42167	8.91223	2.18629e-07	7.21167e-05		ATATAATTGAGGGTGATAT	-6.27382	6.87156	3.50209e-07	0.000152113		CGAATCCTGCCAGGATCGTTACCTTT	7.44002	5.63118	1.54813e-08	6.43805e-06		TGGACCGTAGCGAGAC	5.89123	4.25143	3.46604e-10	1.59932e-07		GCACACATCAAATTTTTCGTGGACT	8.22191	5.08399	1.07104e-07	4.06054e-05		TTTGCGATTTTTTCCAGCGCTACA	-6.94494
GGGTTTCACGTCAACA	-10.2421	5.07015	8.30231e-12	3.69818e-09		TTTGCGACCGAATTCAGGCCAC	6.33936	3.79572	2.73888e-08	1.061e-05		TTCGATGATGTTATCTGCTTAGCAATTCCGAATATATTTGAGGAAAATGCCGCTTACTGAGTTA	-7.1136	7.53817	6.61057e-10	3.51812e-07		AAGTCTTTCGGTTCCGGGGGA	-9.53635	6.62759	2.18563e-07	7.21167e-05		ATTTTGTAATTTTTGGAGGCTCCCCTTCGGGGGAGCGAT	-6.32026	6.86083	3.49142e-07	0.000152113		ATGTAATTTTTTCACCTGTCT	9.47933	5.64762	1.57615e-08	6.45625e-06		TCCCTGAGACTCTCCTTGTGA	5.91138	3.46584	3.66111e-10	1.64283e-07		GGTGAATTTAGGGACAGGTCTTCTAAACTTGTA	-8.2431	4.95249	1.14004e-07	4.28174e-05		TCGATTCCCGGTCAACGCAC	-6.98564
ACTTGGATGGGAGACCTCCTGGGAACCGTTAGT	-10.3373	5.16227	8.7845e-12	3.84116e-09		AACAGCTTACCAAATTGCCATC	6.04331	2.89753	2.89414e-08	1.10057e-05		TGGACTGGATAGTTGCAAACA	-6.67323	9.40976	6.43747e-10	3.51812e-07		CCGCCCGTCGCTG	-9.54329	6.63413	2.16621e-07	7.21167e-05		AAATTCGAATCTGACAATA	-6.92813	6.77746	3.56608e-07	0.000152113		TTTGGGAACATGTCCAGAACCTTA	7.94856	9.53645	1.5818e-08	6.45625e-06		GCCCGTCG	6.92407	2.89824	3.659e-10	1.64283e-07		TTCGGATATACAGAATATGGC	8.19661	5.0612	1.1874e-07	4.38266e-05		TTTGGGATCGAATTAACCAATA	-7.07304
GGATCTATTTTCTCGATCAGAAGGCT	11.7601	7.13924	8.72841e-12	3.84116e-09		TGGCCGTGTGATTAGCTGGTTG	8.40888	3.53367	2.87473e-08	1.10057e-05		GAGGACGTGAAACC	6.35143	6.23859	6.50903e-10	3.51812e-07		TTTGCGACCAAACTTAGATCA	5.89482	9.93484	2.26193e-07	7.3909e-05		ATCGCTTCTCGAGCTTTTTAGCTCAGATCAAAGTGTA	-5.86998	7.43068	3.61365e-07	0.000152728		TCCCTGAGATTTCATATAACCGGA	9.76659	9.96406	1.61324e-08	6.52417e-06		AGAAAGATCAGAGTCGTGTTTA	8.53371	2.86781	3.63395e-10	1.64283e-07		TTGCACATAGACTATTCTGAAA	8.19661	5.0612	1.18872e-07	4.38266e-05		GTATCCAATAGCTTTCGTTGTT	-10.1495
ACCGGATCCCGTCC	-8.70304	5.41237	8.87676e-12	3.84622e-09		CTCCGGAGAGAG	7.77009	2.9467	2.96519e-08	1.11734e-05		GTGAAATTCTTGGACCG	6.98951	5.36398	6.43916e-10	3.51812e-07		TGGACCGTAGCGAGAC	-6.11995	10.4208	2.35681e-07	7.52107e-05		TTATTGCTTGAGAATACTGAT	-6.30142	6.58874	3.73987e-07	0.000155286		TGGCAGTGTGATTAGCTGGTT	6.83587	6.41713	1.6289e-08	6.52761e-06		TGAGATCATGCCAATGTCATTT	6.06942	3.23954	3.70681e-10	1.64822e-07		GGGTTATTTTAAAACTTAGATTTAAA	-6.81199	5.61196	1.22964e-07	4.49233e-05		TTTGCGACCAAACTTAGAT	-6.93615
AGCGGGGAAA	-10.0712	4.9056	9.50687e-12	4.06002e-09		GACAATCTCAGGGCCAGAGCTAAGG	-9.69946	5.42755	3.0911e-08	1.14398e-05		AGACCTCCTGG	9.5557	4.34255	6.40267e-10	3.51812e-07		GATGTCCGGGGCT	-6.68782	7.46874	2.32893e-07	7.52107e-05		GGTGAATTTAGGGACAGGTCTTCTAAACTTGTT	-7.35782	5.99149	3.7416e-07	0.000155286		AGGTTGGAG	7.16951	6.14754	1.70884e-08	6.78626e-06		GGGA	5.95446	3.84883	3.9127e-10	1.69358e-07		GTAATATTCGGAAAGCGTTTTTTA	8.17751	5.0432	1.27276e-07	4.58796e-05		TGAAAGACGTTCTATATCT	-6.19676
TACGTCCCTGCCCTTTGTACACA	-8.33984	6.36628	9.62574e-12	4.06002e-09		GGCGAGATGGCCGAGCGGTCTAAGGC	-7.8136	11.7211	3.07311e-08	1.14398e-05		GAGTTTGACTGGG	9.60985	4.39309	6.55655e-10	3.51812e-07		ACCTCCTGGGAACC	-9.38929	6.48986	2.37377e-07	7.52107e-05		GG	-5.60441	11.6339	4.21013e-07	0.000173172		TTTCGGTTCCGGGGGAAGT	-5.78633	8.279	1.85096e-08	7.28502e-06		TTGGGAACATGTCCAGAACCTT	6.074	3.96844	3.89608e-10	1.69358e-07		TGGCAGTGCGGTTAGCTGGTTG	-6.15336	4.9453	1.27865e-07	4.58796e-05		GCATTTGTCGTTTTCGCCATTTCTGGC	-8.30103
AAAGTCTTTCGGTTCCGGGGG	-8.05634	6.0912	9.56868e-12	4.06002e-09		CTCCGGAGAGA	6.07828	3.64436	3.18487e-08	1.15801e-05		GTTGGAATTTTGAGAGATGTTTAAGG	-10.4472	5.73062	6.74686e-10	3.53479e-07		GATTACGTCCCTGCCCTTTGTACACA	-9.463	6.55861	2.38623e-07	7.52107e-05		ATAAAATCGTGTC	-5.07887	8.93335	4.35891e-07	0.000176146		GAAAGTCTTTCGGTTCCGGGGG	-6.05191	7.91684	1.90716e-08	7.4398e-06		TATATCCATAAACACCACTCTGA	8.54323	2.87522	3.89577e-10	1.69358e-07		GGTGAATTTAGGGACAGGTCTTCTAAACTTGTTTTG	-8.33065	5.03276	1.33124e-07	4.73437e-05		TTTGCGACATACTCAGATCA	-6.06023
GCACCACCAGG	-8.869	5.58059	1.02751e-11	4.2959e-09		TGGCCGTGTAGTTAGCTGGTTG	6.46557	4.5057	3.17135e-08	1.15801e-05		AAAGGGTTTCACGTC	7.70304	4.71175	6.76049e-10	3.53479e-07		GCACCGGATCCCGTCC	-6.17326	8.44655	2.51089e-07	7.84455e-05		TCGAATCCCTCTCTCGTCACC	-6.40714	7.38592	4.3565e-07	0.000176146		CGGTTCCGGGGGA	-6.13538	8.40131	1.94128e-08	7.50647e-06		TTTGCGACCTATACCCAGGCCACG	9.45484	3.76772	4.2428e-10	1.82035e-07		TTTTGGAATGAAGCTAGAAATAGCTTCTAA	-4.01144	8.12166	1.38028e-07	4.86574e-05		TTTGCGACTGTATCCACATC	-6.49728
TTTCGGTTCCGGGG	-8.69894	5.40905	1.04184e-11	4.30042e-09		GGTGAATTTAGGGACAGGTCTTCTAAACTTGTTTTGAGCTAGTA	5.64584	4.93512	3.2965e-08	1.18817e-05		GTGAGTTAGTC	7.91113	4.90093	7.07669e-10	3.66794e-07		GGTTCCGGCC	-6.47801	8.18728	2.65986e-07	8.23771e-05		TCGAATCCCACTCTCGTCACCA	-7.32644	9.84625	4.54143e-07	0.000181926		GAAGGGCACCACCAGGAGTGGAGCCTGCGGC	-6.78696	6.60198	1.96003e-08	7.51305e-06		TCAGAGTGGCATTTATGGATA	8.56622	2.90406	4.46796e-10	1.90028e-07		TTTCGATGATGTTATCTGCTTAGCAATTCCGAATATATTTGAGGAAAATGCCGCTTACTGAGTT	-6.08797	4.88709	1.41158e-07	4.93278e-05		TTTGCGACTAATCCAGGCCACAA	-6.36294
ACCGCCCGTCGCTGCCCGGAACT	-8.39988	6.37088	1.04664e-11	4.30042e-09		GGTGAATTTAGGGACAGGTCTTAA	6.75946	3.55166	3.47132e-08	1.2404e-05		AAGAGGAATCCGACTGT	9.53349	4.32186	7.15182e-10	3.67493e-07		TGGCAGTGTGATTTGCTGGTTG	7.62956	6.63188	2.92418e-07	8.57842e-05		GGTGAATTTAGGGACAGGTCTTCTAAACTTGTTTTGAGCTAGTAACT	-9.33402	6.10769	4.60541e-07	0.000182898		TATTCTGAAATTGTTTTTAATC	9.47921	5.64752	2.03295e-08	7.72537e-06		GAGAGGGCTGGG	-10.6853	5.65199	4.51582e-10	1.90408e-07		AACAGCTCATTAAACTGCCTCT	-4.1595	8.78348	1.45342e-07	5.03521e-05		TGATATGTCTGGTATTCTTGGG	-8.15218
CTGGCACGGACAAGAGGAATCC	-10.078	4.91176	1.09364e-11	4.45512e-09		GGTGAATTTAGGGACAGGTCTTCTAAACTTGTTTAA	7.81923	2.99029	3.55894e-08	1.26084e-05		TATTATGCAAAGTAGAGTGCA	-8.55073	8.21995	7.33992e-10	3.70766e-07		GGTGAATTTAGGGACAGGTCTTCTA	6.2299	8.20721	2.87359e-07	8.57842e-05		TTCGGTTCCGGG	6.97953	7.20866	4.68503e-07	0.000184057		TACGTCCCTGCCCTTTGTACAC	-7.00311	7.33736	2.05568e-08	7.745e-06		TACCCGTAGTCCATTGCTGTC	5.45913	3.96625	4.61741e-10	1.91392e-07		GTAATTGTGGATTCATTTGAGGAA	8.16874	5.03799	1.62238e-07	5.57254e-05		TTTGTATTGCTGAATTTTTGCTC	-7.55008
ATTCTTGGACCGTAGCGA	-8.61117	6.63073	1.19886e-11	4.80168e-09		GTTGGAATTTTGAGAGATGTTTAAGG	-9.65629	5.38618	3.74087e-08	1.29974e-05		ACCAGGAGTG	9.60482	4.38839	7.31301e-10	3.70766e-07		GGTGAATTTAGGGACAGGTCTTCT	5.96886	8.56475	2.93626e-07	8.57842e-05		ATCGCTTCTCGAGCTTTTTAGCTCAGATC	-5.69774	7.60116	4.71449e-07	0.000184057		AGAAGTTTGATTGCCATGAACA	9.53435	5.70168	2.08725e-08	7.79729e-06		TGGCACGTATATCGTTATC	6.93434	2.90542	4.57859e-10	1.91392e-07		TTTTTGGAAGGCCGAGAGGCCTGA	-5.34945	5.88909	1.70443e-07	5.80473e-05		TTGCGTACATATTTCTGAACCTCC	-6.0087
GAACTGGCACGGAC	-8.0182	5.53713	1.19326e-11	4.80168e-09		TACCCGTAATCCACTGCTGCAA	6.13005	2.93386	3.76281e-08	1.29974e-05		TCCCATGTAGTCTAGTGGTTATGATTTGCGGCT	-10.6573	11.7194	7.46297e-10	3.73813e-07		TCGGTTCCGGGGGAAGT	-6.18151	8.67815	2.89312e-07	8.57842e-05		ACAGCTCACTCAACTGCCATGC	-5.49576	7.59178	4.86672e-07	0.000188403		TATCCATAAACACCACTCTGA	9.37437	5.54467	2.14592e-08	7.94909e-06		GGCGGAATGGCCGAGCGGTCTAAGGC	-6.25931	8.5011	4.74332e-10	1.93334e-07		GCAACCTGAATGGTCGGATTTGACA	8.10037	4.97689	1.72964e-07	5.84111e-05		GTAATTGTGGATTCATTTGAGGAAA	-10.1742
GGTTCCGGCC	-8.43009	6.41286	1.22605e-11	4.86966e-09		AATGGCACCTTTGTACGTGTGCG	7.53107	2.73429	3.74309e-08	1.29974e-05		TATAATTGAGGGTGATAT	-8.07398	6.6169	7.81692e-10	3.88279e-07		GCCCGGAACTGAGCA	-6.99904	9.23849	2.80191e-07	8.57842e-05		AATCGCTGTTGTTTGAACCGGGCA	5.85274	8.24375	4.98542e-07	0.00019139		TGGACCGTAGCGAGACGTCCTACT	-6.0312	8.17748	2.31931e-08	8.5198e-06		TCCATAAACACCACTCTGAT	8.181	4.13971	4.74183e-10	1.93334e-07		GGTGAATTTAGGGACAGGTCTTCTAAACTTGTTTTGAGCTAGTAACT	-8.59666	5.28232	1.7901e-07	5.9949e-05		CGTAAGTC	-5.6378
AAAGTCTTTCGGTTCCGGGGGAAG	-10.0058	4.84272	1.24442e-11	4.90178e-09		TGAGATCATATTAAACCCATCT	6.12067	6.03339	3.88609e-08	1.3262e-05		GCGCAAAGTTGG	9.48241	4.27434	8.24448e-10	4.06133e-07		GACCTCCTGGGAACCGTT	-9.33871	6.4422	2.84591e-07	8.57842e-05		GGTGAATTTAGGGACAGGTCTTCTAAACTTGTTTTG	-7.29682	5.88594	5.11161e-07	0.000194613		TATATTTGAAACTTCATCTTTG	9.36215	5.5327	2.3826e-08	8.53882e-06		TTGCGTACATATTTCTGAACCT	5.5442	3.63805	4.9029e-10	1.98187e-07		GTATCCAATAGCTTTCGTTGTTTT	5.71731	6.58001	1.90547e-07	6.32852e-05		TTGGGACCTGTGTTTAAGTTG	-5.69699
GTCTTTCGGTTCCGGGGG	-7.29331	5.98339	1.28747e-11	5.02979e-09		ACAGCTCACTCAATTGCCATG	6.42787	3.19649	3.90341e-08	1.3262e-05		GCAGGGCGG	7.6203	4.57182	9.59995e-10	4.69028e-07		CTGCCCGGAACTGAGCA	-9.8181	6.89411	2.93848e-07	8.57842e-05		TTGGAGGCTCTCCTTCGGGGGAGCGAT	-6.5146	5.91518	5.65079e-07	0.000211643		TTTGCGACTGTATTCAAAACCC	6.39241	6.29039	2.37382e-08	8.53882e-06		TTGGACCGTAGCGAGAC	6.82008	2.8011	5.14421e-10	2.0291e-07		GAATCTTCTGTAATTGTACTTTGTTATC	8.08133	4.96052	1.96011e-07	6.45663e-05		GTGAAATTCTTGGACCG	10.4515
CAAGAACTGGCACGGAC	-10.172	5.00407	1.30811e-11	5.06889e-09		GGGGATATAGCTCAGTGGTAGAGCATGT	-5.91075	11.3224	4.15226e-08	1.39928e-05		GGTGAAATTCTTGGACCGTAGCGAGAC	7.62997	4.58067	1.0095e-09	4.89203e-07		GAGACCTCCTGGGAACC	-7.41619	7.29669	3.15207e-07	9.12718e-05		GGTGAATTTAGGGACAGGTCTTCA	-9.11966	5.89081	5.6397e-07	0.000211643		TGGCATGGGAGAGGGCTGG	-6.42088	7.71263	2.3785e-08	8.53882e-06		GCGGGGAAA	6.90381	2.87624	5.12662e-10	2.0291e-07		GGGGATATAGCTCAGTGGTAGAGCATGTGACTGC	4.09959	8.39485	2.0334e-07	6.64359e-05		TTTGGGAACATGTCCAGAACCTT	-5.93261
GTGCGGTGATTAAGAGAATTTCTGAGCTTA	9.91592	8.48255	1.33042e-11	5.11375e-09		TTCGATGATGTTATCTGCTTAGCAATTCCGAATATATTTGAGGAAAATGCCGCTTACTGAGTTA	-5.86694	7.17267	4.21389e-08	1.40859e-05		GTAAAATTCGAGAAGCTGTTTAACA	-10.3781	5.66216	1.05305e-09	5.05016e-07		TTCGGTTCCGGGGGAAGTA	-5.79409	8.64016	3.19316e-07	9.16448e-05		TAAGGCACAATATTGGCATCTCT	-7.30051	10.4771	5.75348e-07	0.000213751		TCCCTGAGATTTCATATAACCGGAA	9.37427	5.54458	2.4484e-08	8.70386e-06		ATTGCACATAGACTATTCTGAA	8.48552	2.81902	5.08771e-10	2.0291e-07		GGTGAATTTAGGGACAGGTCTTA	-8.17184	4.88433	2.10282e-07	6.81501e-05		TGATGTAATTTTTTCACCTGTC	-8.16238
AAGTCTTTCGGTTCCGGGGGAAGT	-10.015	4.85104	1.35763e-11	5.13549e-09		ACAGCTCACTCAACTGCCAT	5.79873	3.7841	4.56864e-08	1.50748e-05		GTCACTGTT	-8.65379	5.88917	1.05907e-09	5.05016e-07		CCCGGAACTGAGCA	-5.8972	8.5781	3.21642e-07	9.16448e-05		GGTGAATTTAGGGACA	-8.07203	8.70125	5.80095e-07	0.00021379		CCTGCCAGGATCGCCA	-5.43121	8.86393	2.57774e-08	8.94719e-06		CCGCCCGTCGCTGCCC	6.85934	2.8429	5.37719e-10	2.10403e-07		GAAAGGATCATT	-3.83224	8.54635	2.2706e-07	7.29988e-05		GTCATTTGATTTGTTTGATTGATTGTT	-9.95447
AAATTCTTGGACCGTAGCGA	-9.99835	4.83518	1.34864e-11	5.13549e-09		AAGAACTGGCACGGAC	7.41694	2.63577	4.58245e-08	1.50748e-05		GTCCACTTGAGAGAACTTATTTTTGAT	-10.3753	5.65977	1.11154e-09	5.20885e-07		CGCCCGTCGCTGCCCGGAACT	-6.53552	7.85911	3.2897e-07	9.23695e-05		GAACGGGCTTGGCA	5.14397	9.10472	6.06598e-07	0.000221576		ATCTGTTGGGCTCTGCC	-5.89679	7.604	2.55646e-08	8.94719e-06		GCTCGGCTT	6.87743	2.80827	5.42545e-10	2.10607e-07		GTGCGGTGATTAAGAGAATTTCTGAGCTT	4.97082	9.0056	2.48401e-07	7.86024e-05		TTTGAGACTAACGTTAGGGCTAAA	-9.9546
ACACCGCCCGTCGCTGCCCGGAACT	-10.6556	5.47185	1.42332e-11	5.34161e-09		GGCGGAATGGCCGAGCGGTCTAAGGC	-5.6395	9.26741	4.69252e-08	1.53153e-05		AGTTTTGGGTAG	7.56641	4.58331	1.11857e-09	5.20885e-07		TTACGTCCCTGCCCTTTGTACACA	-9.66452	6.74816	3.29372e-07	9.23695e-05		CTGT	-5.07551	8.88732	6.10839e-07	0.000221576		GCCCGGAACTGAGCA	-6.75717	8.44124	2.5664e-08	8.94719e-06		TATATCCCAATGGTGATCAAGA	8.52676	2.85674	5.63344e-10	2.16958e-07		TGGCAGTGTAGTTAGCTGGTTGA	-4.24098	9.23162	2.48225e-07	7.86024e-05		GGTTTTAACTCAAGTAATCTGGACA	-10.0882
TCTTGGACCGTAGCGAGAC	-8.58098	5.29384	1.47262e-11	5.39908e-09		ATCGCTTCTCGAGTTTTTTAGCTCAGATCAAAGTG	7.80292	2.97794	4.75599e-08	1.54012e-05		GGTGAAATTCTTGGACCG	9.42335	4.21952	1.10193e-09	5.20885e-07		TGGACCGTAGCGAGACGTCCT	-6.72953	7.50787	3.48382e-07	9.69372e-05		TTTGCACTTAGATACCTGACTACA	-6.38808	7.44403	6.43065e-07	0.000231443		CGGGGCTGCACGCGCGCT	-6.80476	7.14549	2.64063e-08	9.09386e-06		CGAATCCTGCCAGGATCGTTACCTTT	5.24389	4.22464	5.74079e-10	2.17665e-07		TTTGCGTGTGGGAGGGATGCGTTCGCGCACTCTCCCGA	-4.43785	6.08547	2.51113e-07	7.88397e-05		TTAAGTAGTAGTGCCGCAGGTT	-6.07685
GAAGGGCACCACCAGGAGTGGAGCCTGCGGC	-8.13518	5.59565	1.46318e-11	5.39908e-09		TCCCATGTAGTCTAGTGGTTATGATTTGCGGCT	-7.63881	11.2996	5.1399e-08	1.65154e-05		GCACAGAGTGTAACAATGGAGTCGT	-10.4344	5.71839	1.13458e-09	5.23825e-07		TGGACCGTAGCGAGACG	-5.92721	8.41873	3.53348e-07	9.69699e-05		GGTGAATTTAGGGACAGGTCTTCTAAACTTGTTTTGAGCTAGT	-9.26957	6.04344	6.67099e-07	0.000238232		AACGGGGGCATTCGTATCGCTACGTTAGA	-9.31755	5.57228	2.6916e-08	9.19756e-06		TTTGCGACTGTATCCA	5.78195	4.92367	5.71144e-10	2.17665e-07		ATGGACTAAAAGCAATTTCAGA	8.08272	4.96337	2.69601e-07	8.3342e-05		TGAGATCAAACTAGACTCATT	-5.94822
GCCCGTCGCTGC	-8.04207	7.01252	1.46026e-11	5.39908e-09		GTAAAATTCGAGAAGCTGTTTAACA	-9.58516	5.31809	5.49084e-08	1.75073e-05		GGTTCCGGGG	6.85995	5.24046	1.14246e-09	5.23825e-07		TGCCCTTAGATGTCCGG	-9.32248	6.42837	3.53945e-07	9.69699e-05		CA	-5.27069	7.56357	6.78175e-07	0.000240324		TTTGGGAACATGTCCAGAACCT	7.07102	6.05038	3.0337e-08	1.01442e-05		TTTGCACTTAGATCCCTGACTAC	8.44826	2.78435	5.78724e-10	2.17738e-07		GTACTTCAGAGTGTTTCTCGTCCGA	8.02475	4.91001	2.68108e-07	8.3342e-05		GTGCGGTGATTAAGAGAATTTCTGAGCT	-8.33722
CACCGCCCGTC	-7.88719	5.86859	1.50588e-11	5.47888e-09		AGTGTGGTTAGCTGGTTG	5.65685	2.56696	6.06039e-08	1.90326e-05		GGGGAAGTATG	7.19227	6.20574	1.19457e-09	5.4354e-07		TAGGGTTCGACTCCGGAG	-6.94373	7.71395	3.75872e-07	0.000101417		GGTGAATTTAGGGACAGGTCTTCTAAACTTGTA	-9.04186	5.81338	6.9703e-07	0.000245121		TCCCATGTAGTCTAGTGGTTATGATTTGCGGCTC	6.72493	9.06824	3.03767e-08	1.01442e-05		TCGGATATACAGAATATGGCT	8.62638	2.95103	5.90079e-10	2.20316e-07		GGTGAATTTAGGGACAGGTCTTCTAAACTTGTTTTGAGCTAGT	-8.53792	5.22525	2.82931e-07	8.67951e-05		TTGCGACCAAACTTAGATCAA	-6.97837
TCTTTCGGTTCCGGGGGA	-10.0598	4.89393	1.53425e-11	5.53979e-09		GTAGTTAGCTGGTTG	7.36399	2.58996	6.06105e-08	1.90326e-05		CCCGTCCGATCTCCG	9.40522	4.20272	1.22934e-09	5.55123e-07		TGGACCGTAGCGAGACGTCCTACTGCG	-9.27783	6.3864	3.73662e-07	0.000101417		GGTGAATTTAGGGACAGGTCT	-9.12178	5.89488	7.04098e-07	0.00024573		TTGCGACCTATTCATGATCA	6.42636	6.68977	2.99676e-08	1.01442e-05		TTAAAGCTTAGATCAAACGTC	6.23865	3.48095	6.04908e-10	2.24142e-07		GGTGAATTTAGGGACAGGTCTTCTAAACTTGTTTTGAGCTAGTAACTCATTCACT	-5.8786	5.48445	2.88767e-07	8.79143e-05		TAACCGGATATATTTGACTACAG	-5.73023
TGGATGGGAGACCTCCTGGGAACC	-8.66147	5.37189	1.60923e-11	5.76685e-09		GCACAGAGTGTAACAATGGAGTCGT	-9.64874	5.37948	6.27376e-08	1.95524e-05		GTGTAATTCTCTAGTATCGTAGAAT	-10.3041	5.5894	1.24501e-09	5.57972e-07		ACCGCCCGTCGCTGCCCGGAACT	-6.91334	8.22539	3.9104e-07	0.000104716		ATAAAAAGTGTTGTT	9.51688	6.41957	7.5168e-07	0.000258979		CTTTCGGTTCCGGGGGA	-5.95851	7.47782	3.12209e-08	1.03477e-05		ACCGGGCA	6.7933	2.77373	6.24531e-10	2.27959e-07		GGTGAATTTAGGGACAGGTCTTCTAAACTTGTTTA	-8.57115	5.27534	2.9372e-07	8.875e-05		GGGCTTGATTGTCGTTTTGGTACA	-10.2219
TCGGAAACGAAAGTCTTTCGGTTCCGGGGGAAGT	-10.2754	5.10456	1.64821e-11	5.85933e-09		GGGGATATAGCTCAGTGGTAGAGCATGTG	-5.75765	9.16065	6.47422e-08	1.99751e-05		GACGATATTGTAGAAATACCAACCTAC	-10.434	5.7176	1.28332e-09	5.5928e-07		GGTGAATTTAGGGACAGGTCTTCTAAACTTGTTTTAA	9.29394	6.33759	4.00218e-07	0.000105586		TAAGCTCGTAGCTACAGGTTT	-6.42006	9.54726	7.53304e-07	0.000258979		GTAATTGTGGATTCATTTGAGGAAA	9.39814	5.56798	3.21188e-08	1.03962e-05		TTTGCGACATACTTAGATCAG	6.85534	2.83902	6.2207e-10	2.27959e-07		GGCATTTTCAAAATATTTAGCATTGTC	8.02266	4.91026	3.00095e-07	8.93329e-05		TTTGCGACTGTATCCACATCACT	-5.70665
GGGCTTGATTGTCGTTTTTGTACACT	11.7582	7.13724	1.65962e-11	5.85933e-09		TGGCAGTGTCGTTAGCTGGTTG	5.59543	2.51618	6.50575e-08	1.99751e-05		GCCTCATTAGTTCAGTTGGATAGAATGTATG	-8.02802	6.063	1.27723e-09	5.5928e-07		ATTCTTGGACCGTAGCGA	-5.96787	8.46409	3.98434e-07	0.000105586		TTTGCGACCAAACTTAGATCA	-5.18193	10.2903	7.78734e-07	0.000265739		TGAAAGACATGGGTAGTGAG	8.75039	9.13058	3.24585e-08	1.03962e-05		CACCGCCCGTCGCT	6.77674	2.76227	6.73913e-10	2.44161e-07		TGTAATTTTTTCACCTGTCTT	7.99722	4.88715	2.98517e-07	8.93329e-05		GATATC	-7.42227
TGAATGCACCGGATCCCGTCC	-8.59561	5.3139	1.72406e-11	6.04207e-09		CACCGCCCGTCGCT	5.59537	2.51619	6.55998e-08	1.99935e-05		TCTAACGGTCAGGGGT	-7.69779	6.61816	1.28546e-09	5.5928e-07		GGTGAATTTAGGGACAGGTCTTCTAAACTTGTTTTGAG	7.25639	6.27205	4.1471e-07	0.000107812		TTTGCGACTGTATCCAAACTAC	-6.64989	10.8134	7.88362e-07	0.000267046		TTAAGTAGTAGTGCCGCAGGTT	6.21718	6.75128	3.25464e-08	1.03962e-05		GGCACGGAC	8.43314	2.77279	7.3701e-10	2.65058e-07		GGTGAATTTAGGGCCAGGTCTTCTAAACTTGTTTTGAGCTAGTAACTCA	-8.1223	4.83701	3.12983e-07	9.24841e-05		GGGCTTGATTGTCGTTTTTGTACACT	-9.9419
GACCTCCTGGGAACCGTTAGT	-8.59936	5.31149	1.77403e-11	6.12709e-09		GGTGAATTTAGGGACAGGTCTTCTAAACTTGT	5.04337	4.79816	6.80077e-08	2.05761e-05		TGGGAACCGTT	7.89586	4.88702	1.28497e-09	5.5928e-07		TGTGATGCCCTTAGATGTCCGG	-9.25271	6.36303	4.11684e-07	0.000107812		TGGCAGTGTAGTTAGCTGGTTG	-6.46929	15.4723	8.52647e-07	0.000286713		GCCCGTCGCTGCCCGGAAC	-6.07384	7.37749	3.21051e-08	1.03962e-05		ACCGCGGA	5.89071	3.10233	7.73121e-10	2.74472e-07		TTTGGAAGGCCGAGAGGCCTGA	-3.8344	8.23163	3.27365e-07	9.6028e-05		GAGAGGAACCGT	10.5943
AAGCTCGTAGTTGGATT	-7.69849	6.03473	1.77017e-11	6.12709e-09		GATTTCGTGGTGTAGTCGGTTATCACATCTGTCTGACACACAG	-11.2049	6.89002	6.9217e-08	2.0678e-05		GAAACGTTATTTTTCTTCGCGGCAG	-10.4215	5.70536	1.32489e-09	5.72255e-07		TAGAATGAGGACACCATATCAAACCTGAGT	10.1781	7.20356	4.2154e-07	0.000108617		TTCATTGTCCAGCGTTGAACCGA	-6.32575	6.86583	8.81351e-07	0.000294218		TAGGGTTCGACTCCGGAG	-7.1156	6.91473	3.17023e-08	1.03962e-05		GTAGCGAGACGTCC	8.40495	2.74506	7.74409e-10	2.74472e-07		AAAAGAAAGATCAGAGTCGTG	7.95986	4.85494	3.38942e-07	9.87033e-05		GTTGTTGT	-7.95768
GATCCCGTCCGAT	-10.3751	5.20146	1.8005e-11	6.14763e-09		TGATATGTCTGGTCTTCTTGGGT	5.37393	5.82413	6.93422e-08	2.0678e-05		CATGTCTGGCGGG	7.5522	4.57016	1.36287e-09	5.84426e-07		TTTCGGTTCCGGGGGAAGTA	-7.34362	7.24019	4.25908e-07	0.000108617		GGGTTATTTTAAAACTTAGATTTAA	-9.52944	6.29871	9.18929e-07	0.000304556		TACCCGTAATCCAATGCTG	6.75164	7.31999	3.29675e-08	1.0455e-05		GACCGTCGTGAGA	6.36051	3.10128	7.85435e-10	2.76377e-07		GAAGTAGAATTATTTGATTGGAGAAGG	7.97677	4.86971	3.43239e-07	9.92355e-05		TTTGCACTTAGATACCTGACTAC	-5.54557
TACGTCCCTGCCC	-8.64677	5.35886	1.81343e-11	6.14763e-09		TCCGATGTAGTCTAGTGGTTATGATTTGC	-7.17298	6.717	7.05169e-08	2.0878e-05		AGAACTGGCACGGAC	9.36807	4.16836	1.39554e-09	5.9416e-07		GCCCGGAACTGAGCAAT	-9.49162	6.5847	4.26955e-07	0.000108617		GAAATATATATATAGG	-6.33562	6.22927	9.31943e-07	0.000305756		AGGTTGGAGAA	6.35962	7.14758	3.39053e-08	1.05999e-05		TCGAGTCCCATCGGAATCGTCAACCTTTT	5.50439	3.98598	8.15557e-10	2.84926e-07		GATTTCGTCGTGTAGTCGGTTATCACATCTGTCTGA	8.00257	4.89312	3.51947e-07	0.000101026		TTTGCGTACATATTTCTGAACCTCC	-5.82284
TCCCTGAGACTCTACTTGTGA	7.47695	11.0992	1.81867e-11	6.14763e-09		GAAACGTTATTTTTCTTCGCGGCAG	-9.63695	5.36776	7.36288e-08	2.15949e-05		AGACCTCCTGGGAACCG	7.79079	4.79624	1.43024e-09	6.04615e-07		TGAAAGACATGGGCAGTGAGACG	6.49593	8.7437	4.30604e-07	0.000108769		GGGTTATTTTAAAACTTAGATTTGAAAA	-7.59182	6.17958	9.35824e-07	0.000305756		AATTCTTGGACCGTAGCGAGACGTCCTAC	-6.61965	6.44214	3.36766e-08	1.05999e-05		CCGGGCA	8.5047	2.8455	8.43214e-10	2.92499e-07		TAATTTTTATAACACAATCATA	8.25553	5.10694	3.88055e-07	0.000109822		GTGAAATTCTTGGACCGTAGCG	7.45927
GCACGCGCGCT	-10.117	4.95107	2.02374e-11	6.74043e-09		GTGTAATTCTCTAGTATCGTAGAAT	-9.51589	5.25235	7.398e-08	2.15949e-05		GGTTTCACGTCA	8.14799	5.13815	1.47162e-09	6.1773e-07		TTTGCGACAGTTGTTGGCTTA	6.35255	7.43025	4.38664e-07	0.000110024		GGTGAATTTAGGGACAGGTCTTA	-8.95967	5.73171	9.43779e-07	0.000306183		TGAGATCATGTTAGACTCA	9.26102	5.43371	3.58769e-08	1.10594e-05		CCGCGGAA	6.73979	2.72182	8.54789e-10	2.93924e-07		AGAAGTTTGATTGCCATGAACA	6.10039	5.55325	3.8546e-07	0.000109822		TATATCCCAATGGTGATCAAG	-9.80962
AAGCTCGTAGTTGGATTAT	-7.7962	5.83089	2.03647e-11	6.74043e-09		GGTGAATTTAGGGACAGGTCTTCTAAACTTG	4.68988	4.78047	7.46167e-08	2.16284e-05		GAAAGAAGACCCTG	7.53252	4.54337	1.54751e-09	6.45041e-07		GCCCGGAACTGAG	-6.26781	7.98382	4.43167e-07	0.000110376		GAGTTTGACTGGG	9.43435	6.34365	9.54633e-07	0.000307539		TACGTCCCTGCCCTTTGTACACACC	-6.79423	6.60637	3.56323e-08	1.10594e-05		TTTGCGACCATATTCAAAGCCCGT	8.39698	2.73261	8.5934e-10	2.93924e-07		GACCGTTTTTTTGAGATCTTTGTCCTT	8.01153	4.90185	3.94131e-07	0.000110762		ATAGGAAATGAATAAGGAGA	-5.68339
GGGCTTGATTGTCGTTTTTGTACA	11.6962	7.0758	2.02114e-11	6.74043e-09		GGCGAAATGGCCGAGTGGTCTAAGG	-8.26544	6.9279	7.78644e-08	2.2413e-05		GTAGTCTGTTCTTGGATTTGGAACT	-8.24931	5.49008	1.57364e-09	6.51377e-07		ATAGGAAATGAATAAGGAGAGAA	7.85451	11.2531	4.5498e-07	0.000111194		TAAAATCGTGT	-5.19079	9.23259	9.69297e-07	0.000310094		TATATCCATAAACACCACTCT	9.2078	5.3817	3.75268e-08	1.14084e-05		TGGCAGTGTGATTGGCTGGTTG	6.45521	3.19303	8.6604e-10	2.94159e-07		TTGCGTGTGGGAGGGATGCGTTCGCGCACTCTCCCGA	-5.85748	4.70809	4.00782e-07	0.000111849		TTTGCACCTTATTCAATCACCA	-7.2621
GACTGGGGCGGTA	-9.97802	4.81509	2.09067e-11	6.8721e-09		TCTTTGGTTGTTTCGCTGTATG	7.79026	2.96175	7.89319e-08	2.25636e-05		GTAATCTTTAGAACCTTTTGGAGCT	-10.2781	5.5638	1.63061e-09	6.62066e-07		TTTGCGACCCAATCCAGGCTAA	5.65518	8.23435	4.55354e-07	0.000111194		ACGTGGGATG	9.60263	6.50004	1.06617e-06	0.000327443		TTTGGGACCTGTGCTTAAGTTG	6.45892	6.4008	3.73755e-08	1.14084e-05		CTCCGGAGAG	5.91959	3.13259	8.7824e-10	2.96245e-07		TTGCACATAGACTATTCTGA	7.9254	4.82492	4.24457e-07	0.000117639		GTAATATTCGGAAAGCGTTTTTTA	-7.89428
TCTTGGACCGTAGC	-8.57735	5.29012	2.18367e-11	7.08014e-09		TGGCAGTGTGATTAGCTGGTT	4.79422	7.2284	7.97557e-08	2.2643e-05		TAAAGCTTAGATTAAACGTCC	-8.55406	5.79067	1.66853e-09	6.62066e-07		CGGTTCCGGGGGAA	-6.59449	9.08887	4.60927e-07	0.000111194		GTCACTGT	-4.94861	8.25973	1.05017e-06	0.000327443		TCACCGGGTGAACGAATTCTC	-8.43598	9.13846	3.7944e-08	1.14562e-05		TCTATATGTTGAGCATACTTTCTGAACT	6.4278	3.1282	8.9726e-10	3.00588e-07		AATGTTATCCGTTTGTTATCT	7.88609	4.79122	4.77752e-07	0.000131503		TTTGCGTACATATTTCTGAACCT	-5.52175
AAGCTCGTAGTTGGAT	-8.33442	5.8425	2.17998e-11	7.08014e-09		GGTGAATTTAGGGACAGGTCTTCTAAACTTGTTTTGAGCTAGTAACTCATTCA	4.69951	5.29229	8.67952e-08	2.44739e-05		GGGGATATAGCTCAGTGGTAGAGCA	-8.48829	9.62604	1.61101e-09	6.62066e-07		ACACCGCCCGTCGCTGCCC	-7.8364	7.70008	4.60013e-07	0.000111194		TTGGCAGTGTAGTTAGCTGGTTG	-6.25054	6.47154	1.03481e-06	0.000327443		GGGTTTCACGTCAAC	-6.47404	7.21118	3.89809e-08	1.16892e-05		TTTGCGACTGTATCCACATC	4.8655	7.07962	9.09398e-10	3.02582e-07		TGGCAGTGTAGTTGGCTGGTTG	-4.35924	8.3559	5.90025e-07	0.000161302		TCGAATCCTGCCAGGATCGTTATCTTT	-9.74669
ATTCTTGGACCGTAGCGAGACGTCC	-8.4813	5.19732	2.2554e-11	7.2633e-09		GGTGAATTTAGGGACAGGA	5.8615	3.39918	8.87892e-08	2.4867e-05		GAATTTGGAAGTGTAGCTTTT	-7.99034	6.53414	1.66925e-09	6.62066e-07		CCTATGAATCCGAT	-9.33016	6.43329	4.62059e-07	0.000111194		TTCCA	-6.31527	6.20922	1.05516e-06	0.000327443		GGTTTTAACTCAAGTAATCTGGACA	7.29628	5.49033	3.95077e-08	1.17672e-05		TGAGATCATATTAAACCCATC	7.91496	2.27569	9.25086e-10	3.05722e-07		GTTGGAATTTTGAGAGATGTTTAAG	7.84978	4.75974	6.08499e-07	0.00016417		AGAGGGCTGGG	7.54721
AAAACAGCGGGGA	-7.8622	5.38512	2.33501e-11	7.4692e-09		GTAGTCTGTTCTTGGATTTGGAACT	-9.40928	5.15116	9.50083e-08	2.64302e-05		CACCGGTTGAGCCCCCA	-6.81409	7.55374	1.68832e-09	6.62066e-07		GGTGAATTTAGGGAC	6.59554	7.57183	4.6657e-07	0.000111284		CTGTT	-6.84564	6.28516	1.05574e-06	0.000327443		GTCATTTGATTTGTTTGATTGATTGTT	7.16339	5.36199	3.98344e-08	1.17848e-05		ATAGGAAATGAATCAGGAGAG	6.22433	2.20725	9.42196e-10	3.09287e-07		GGTGAATTTAGGGACAGGTCTTCTAAACTTGTTT	-6.17473	5.80598	6.08688e-07	0.00016417		TTTGCGTACATATTTCTGAACCTC	-6.72704
GGAACTTCGAAGATCTTTGTAACT	11.5715	6.952	2.38956e-11	7.59274e-09		GTAATCTTTAGAACCTTTTGGAGCT	-9.49165	5.22928	9.60355e-08	2.65378e-05		TCTTGGACCGTAGCGAGACG	7.5372	4.54785	1.66505e-09	6.62066e-07		GGTGAATTTAGGGACAGGTCTTCTAA	6.46271	7.21615	4.68683e-07	0.000111284		TTTCGATGATGTTATCTGCTTAGCAATTCCGAATATATTTGAGGAAAATGCCGCTTACTGAGTT	-8.97099	5.74192	1.05995e-06	0.000327443		TGAAAGACATGGGTAGTG	9.2212	5.3948	4.012e-08	1.17902e-05		CTGGCACGGAC	8.3574	2.696	9.73927e-10	3.15468e-07		GATTTCGAATGAACTGTATATTTTACTC	5.23242	5.59232	6.13823e-07	0.000164451		TGAGATTCTCTTTTCTTCATTCA	-7.24956
GATTACGTCCCTGCCCTTTGTACACA	-9.87666	4.71792	2.42445e-11	7.61033e-09		GGTGAATTTAGGGACAGGTCTTCTAAACTTGTTTTA	5.45064	5.50183	9.73503e-08	2.6723e-05		GTAGCGAGACG	8.13234	5.12334	1.68695e-09	6.62066e-07		GCCCGGAACTGA	-7.12315	7.87744	4.73971e-07	0.000111794		TCT	-7.11556	5.70615	1.08646e-06	0.000331464		GAACTGGCACGGACAAGAG	-6.55316	6.37862	4.14807e-08	1.21093e-05		AAAAGAAAGATCAGAGTTGTG	8.42293	2.76506	9.68555e-10	3.15468e-07		GGAGAAGTTGTTGGTTGTGGAAT	7.88418	4.78765	6.29722e-07	0.000167594		CATTATGTCGATACAACTTGAACTGAGCT	-6.06904
CGAGAGGCAGGAAGA	-9.85404	4.69701	2.42703e-11	7.61033e-09		GATACATGACTTCGTCTTTTGGAACT	-9.46593	5.20542	9.87965e-08	2.68532e-05		CTCTGGTCGAT	9.39948	4.1974	1.66618e-09	6.62066e-07		TGGCAGTGTAGTTAGCTGGT	9.1902	6.23694	4.83616e-07	0.000113319		TGATAT	-5.64745	7.51802	1.12174e-06	0.000339976		CTATATGTTGAGAATACTTTCTGAACT	7.69279	8.45612	4.37585e-08	1.24381e-05		GATTCCGTA	4.84854	5.51233	9.98256e-10	3.19122e-07		AAAGATCAGAGTCGTGTTTATG	9.71229	6.45503	6.38159e-07	0.000168722		TTCGGATATACAGAATATGGC	-9.76312
GGTGAAATTCTTGGACCGTAGCGAGAC	-9.10089	5.74083	2.47117e-11	7.6481e-09		TTTGCGACCTATACCCAGGCCACG	7.91655	3.07648	9.91203e-08	2.68532e-05		CGCCCGTCGCTGCCCG	7.53773	4.55692	1.75711e-09	6.84539e-07		TTAGGGTTCGACTCCGGA	-9.18081	6.29445	4.98196e-07	0.000115972		AAACGAAAGTCTTTCGGTTCCGGG	9.5673	6.46578	1.14947e-06	0.000342566		TCGATTCCCGGTCAACGCACC	6.04116	6.50245	4.40177e-08	1.24381e-05		AAGGGTTTCACGTC	6.0389	2.71466	9.97503e-10	3.19122e-07		GACACAAATTATAAAGAAGATCTTCCT	7.8661	4.77193	6.52228e-07	0.000170486		TATTATGCAAAGTAGAGTGCAA	-9.97036
GAAAGTCTTTCGGTTCCGGGGG	-8.16487	6.87898	2.4591e-11	7.6481e-09		GGTGAATTTAGGGACAGGTCTTCTAAACTTGTTTTAAA	4.85167	4.59403	1.03667e-07	2.77227e-05		GATACATGACTTCGTCTTTTGGAACT	-10.2561	5.54238	1.77533e-09	6.87146e-07		TACGTCCCTGCCCTTTGTACACACC	-6.62154	7.40421	5.02021e-07	0.000116104		TTTGCGACATACTCAGATCAG	-5.13425	9.51784	1.14535e-06	0.000342566		GAAAGTCTTTCGGTTCCGGGG	-5.79964	8.07431	4.30442e-08	1.24381e-05		TTTGCGACTAATCTAGGCCACAA	5.50716	2.26646	1.18647e-09	3.2607e-07		GGTGAATTTAGGGACAGGA	-7.86348	4.60079	6.53317e-07	0.000170486		TTGCACATAGACTATTCTGAAA	-7.13372
TCTTGGACCGTAGCGA	-8.45128	6.47332	2.64232e-11	8.12505e-09		TGGCAGTGTGATTGGCTGGTTG	8.34718	5.86961	1.03624e-07	2.77227e-05		CTGGTCGATG	9.29788	4.10357	1.87906e-09	7.22601e-07		TGCCCGGAACTGAGC	-6.85473	7.64075	5.14623e-07	0.00011825		TGGCAGTGTAGTTGGCTGGTTG	-5.27791	9.20918	1.1526e-06	0.000342566		TTCGGTTCCGGGGGAAG	-5.93737	7.45876	4.39395e-08	1.24381e-05		CGAGTCCCATCGGAATCGTTGACCTTTT	5.90978	3.42491	1.1396e-09	3.2607e-07		GTATCCAATAGCTTTCGTTGTT	5.92913	5.42596	6.63377e-07	0.000171994		GCACACATCAAATTTTTCGTGGACT	-9.79471
CTTTCGGTTCCGGGG	-8.5105	5.22524	2.7094e-11	8.2779e-09		GATTCTTTGGATCCTTGGTTGGACA	-9.69216	5.42036	1.05295e-07	2.79775e-05		GTTAAATTTGTCTGGAGTGAAGAATT	-10.1989	5.48588	1.96004e-09	7.45138e-07		CTGGCGGGGAGTTT	-9.45834	6.55318	5.18967e-07	0.000118484		GGGTTATTTTAAAACTTAGATTT	-9.53877	6.31451	1.18119e-06	0.000348815		GAAAGTCTTTCGGTTCCGGGGGAAGTA	-7.03119	6.83724	4.37293e-08	1.24381e-05		TTTGCGACCTATATCCAGGCC	6.01957	2.69388	1.09087e-09	3.2607e-07		GGGTTATTTTAAAACTTAGATTTGAAAA	-8.69693	5.37487	6.693e-07	0.000172418		ATAGGTTGGAG	-7.10576
AATTCTTGGACCGTAGCGAGACGTCCTAC	-7.95924	5.42993	2.79789e-11	8.49382e-09		GAACATGTCAACTAAATATGAACTA	-9.56788	5.30239	1.06843e-07	2.80294e-05		AGCAGGCGCG	7.68959	4.6917	1.96267e-09	7.45138e-07		GGTGAATTTAGGGACAGGTCTTCTAAAA	9.43435	6.47402	5.27054e-07	0.000119564		TTTGGGATCGAATTAACCAATA	-5.59666	6.41165	1.19526e-06	0.000350722		TGATGTAATTTTTTCACCTGTC	9.19402	5.36825	4.54095e-08	1.27496e-05		TGAGATCAAATTAGACTTA	6.10741	2.13183	1.19024e-09	3.2607e-07		GATTTATTTATTTTGTTAGTTGGGTT	7.83334	4.7475	6.83547e-07	0.000174966		CGAATCCTGCTGGCTGCGAATACTCTTT	-9.62951
CTCCGGAGAGGG	-9.83071	4.67479	2.91351e-11	8.78886e-09		GTTAAATTTGTCTGGAGTGAAGAATT	-9.40697	5.14927	1.06449e-07	2.80294e-05		GAACCGGGCA	6.86655	5.59594	2.00108e-09	7.50298e-07		TTCGGTTCCGGGG	-5.55288	9.03353	5.3565e-07	0.000119986		TAACCTGTCACTCGATGCTTATG	-5.91799	6.49301	1.21269e-06	0.000351359		CGCCCGTCGCTGCCCGGAACT	-6.01258	7.06937	4.69167e-08	1.30895e-05		TAGTGGTCTTC	6.17304	2.16204	1.15082e-09	3.2607e-07		TGGCAGTGTGGTTAGCTGGTCG	-5.57809	5.20146	7.51288e-07	0.000191089		CGAATCCTGCTGACTGCGAATTTCTTT	-7.85826
GACATCGGTGTTGTTCTTGTAGAAT	11.4318	6.81355	3.12189e-11	9.35822e-09		TATCTGATTGATCTT	5.73475	2.60011	1.07954e-07	2.81428e-05		ACTGTGTCTGATTTCTGCCCA	9.32986	4.13307	2.00143e-09	7.50298e-07		TACGTCCCTGCCCTTTG	-6.38834	7.7172	5.3458e-07	0.000119986		GGTGAATTTAGGGCCAGGTCTTCTAAACTTGTTTTGAGCTAGTAACTCA	-8.90218	5.67467	1.21098e-06	0.000351359		TGAAAGACATGGGTAGTGA	6.83152	5.93173	4.78038e-08	1.31702e-05		TACCCGTAGTCCACTGCTGT	6.17971	2.16692	1.16819e-09	3.2607e-07		GTATCCAATAGCTTTCGTTGTTT	7.81464	4.73137	7.58097e-07	0.000191608		TATATCCATAAACACCACTCT	-6.88753
TTGAACCGGGCA	-10.1665	4.99935	3.33714e-11	9.63233e-09		TACCCGTAGTCCACTGCTGT	6.59541	3.34259	1.10998e-07	2.87555e-05		GATTCTTTGGATCCTTGGTTGGACA	-10.4745	5.75761	2.0338e-09	7.5296e-07		ACCGCCCTAGTT	-9.26154	6.37192	5.59387e-07	0.00012452		GAGACCTCCTGGGAACCG	5.8876	7.59768	1.23916e-06	0.000356785		TTAAAGCTTAGATTAAACGTCC	5.61167	8.86805	4.75176e-08	1.31702e-05		CGAATCCGGTTGGTTGGAGACTTTT	6.1963	2.21326	1.05232e-09	3.2607e-07		TAAAGATGAAGTTTCGGATAT	7.82087	4.73373	7.7484e-07	0.000194615		ATAGGTTGG	-9.61197
AAAGTCTTTCGGTTCCGGGGGAAGTA	-10.0302	4.8675	3.25674e-11	9.63233e-09		AGCTGGTTG	7.23535	2.48172	1.13564e-07	2.92376e-05		AGAACTGGCACGGACA	5.96021	5.83063	2.0275e-09	7.5296e-07		GAAAGTCTTTCGGTTCCGGGG	-6.20633	8.86632	5.67078e-07	0.000125448		TCGATTCCCGGTCAACGCAC	-5.87956	6.13997	1.27877e-06	0.000365903		GCTGCCCGGAACTGAGC	-5.57967	7.74012	4.90277e-08	1.34235e-05		TGTCCGGGGCT	6.20201	2.21827	1.16396e-09	3.2607e-07		TTTGGGAACATGTCCAGAACCT	5.00923	5.90254	7.96553e-07	0.000198827		ACGTTTGATCGAGCTTTAAATA	-5.81988
ATTAGGGTTCGACTCCGGAG	-9.97785	4.81452	3.37501e-11	9.63233e-09		GGTGAAATTCTTGGACCGTAGCGAGACGTCCTAC	6.3512	4.29753	1.14898e-07	2.93984e-05		AAAACAGCGGGG	7.47005	5.84991	2.06242e-09	7.56491e-07		GGTGAATTTAGGGACAGGTCTTCTAAACTTGTTTTAAA	9.25416	6.29878	5.76526e-07	0.000125973		AA	-5.0825	8.10601	1.30157e-06	0.000370129		GTGCGGTGATTAAGAGAATTTCTGAGCT	9.39801	5.56787	5.02988e-08	1.36866e-05		TCCGTCGGAGTCGGCTT	6.36334	2.33141	1.09249e-09	3.2607e-07		GAGGAATTGATTCTTTCCCAAATCGTC	5.15166	5.51923	8.44109e-07	0.000209396		GTCTTACGCTCATATCC	-5.12716
GAAGGGCACCACCAGGAGTGGAGCCTGCGG	-9.94114	4.78149	3.31266e-11	9.63233e-09		TGGCAGAGTAGTTAGCTGGTTG	6.31179	3.13859	1.15683e-07	2.94176e-05		GTAAGCTTGACTGG	9.49421	4.28529	2.06872e-09	7.56491e-07		GCACGCGCGC	-9.21496	6.32824	5.7624e-07	0.000125973		CTTGGCATGGGAGAGGGCTG	9.52077	6.42264	1.31777e-06	0.000372436		CTTTCGGTTCCGGGGGAA	-5.69072	7.56768	5.13452e-08	1.38856e-05		TGAGATCAATGGGCATCTTCAAA	6.40301	2.36774	1.19999e-09	3.2607e-07		GGTGAATTTAGGGAC	-4.58323	7.08278	8.50573e-07	0.000209705		TTGAGATCAATGGGAATCTTCA	-6.4072
GGTGAAATTCTTGGACCGTAGCGAGACGTCCT	-9.1344	5.77301	3.34921e-11	9.63233e-09		TTTGGGAACATGTTCAGAACCTT	5.99474	2.81321	1.17036e-07	2.95801e-05		GGGCTTGATTGTCGTTTTGGTACACA	-10.2277	5.51415	2.11193e-09	7.65044e-07		CCCGGGCCGGAC	-9.16266	6.27725	5.94176e-07	0.000129038		GCGACGTGG	6.96162	7.19333	1.32709e-06	0.000372783		GGGCTTGATTGTCGTTTTGGTACA	9.44481	5.61377	5.52003e-08	1.48371e-05		TGAGATCATGTTAAACTCATA	6.68995	2.67683	1.05781e-09	3.2607e-07		GGGTTATTTTAAAACTTAGATTT	-6.79356	5.53381	8.61392e-07	0.000211078		CGAGCCCCCTGGAGGGCTTAGTCTTT	-9.61229
CCGGATCCCGTCC	-8.34189	5.86333	3.36073e-11	9.63233e-09		CATCG	5.47487	3.48612	1.18657e-07	2.98081e-05		GCAACATCAACCACCTTCGTCATGT	-10.1792	5.46651	2.11778e-09	7.65044e-07		CGAAAGTCTTTCGGTTCCGGGGGAAGT	-9.12359	6.2411	6.00891e-07	0.000129705		TGGCAGTGTAGTTCGCTGGTTG	-5.02221	9.65476	1.33862e-06	0.000373742		AGGACGTGAAACCGAT	-6.45949	7.49978	5.65453e-08	1.50155e-05		ATAGCAAACGAATAACTTTGG	7.81161	2.18261	1.15528e-09	3.2607e-07		GAAAAACAACAAACTAATTAAAGG	7.76993	4.69132	8.9736e-07	0.000218559		GCAACCTGAATGGTCGGATTTGACA	-9.66475
GAACTGGCACGGACAAGAG	-7.8376	5.36223	3.29941e-11	9.63233e-09		GCGGGTTTAAGTTAAGTTTAAACTAGTGGTCTTC	5.95444	2.81977	1.21887e-07	3.04349e-05		GAATTGGACTAAAACTTGACTGAAGACT	-10.1456	5.43323	2.13177e-09	7.6546e-07		CCCGGCTCG	-9.17071	6.28689	6.11649e-07	0.000131232		GTGCAAATCGGT	9.3704	6.28504	1.43872e-06	0.00039927		TCACCGGGTGAACAAATTCTC	-9.15297	5.41838	5.65214e-08	1.50155e-05		CATAAACACCACTCTGATCTACCT	7.81161	2.18261	1.15253e-09	3.2607e-07		GGTGAATTTAGGGACAGGTCTTCTAAACTTGTTTTGAGCTAGTAACTC	-8.14514	4.85365	9.6222e-07	0.000232944		TAATTTTTATAACACAATCATA	-9.7605
GTAACCTGAATGGTCGGATTTGACA	11.4189	6.80081	3.28849e-11	9.63233e-09		GGGCTTGATTGTCGTTTTGGTACACA	-9.44211	5.18233	1.24115e-07	3.08059e-05		ATGTCTGGCGGG	7.35692	5.20725	2.19517e-09	7.83505e-07		GGGTTTCACGTCAAC	-6.28731	8.0103	6.33296e-07	0.000135063		ATCTATGCTGAATAACAAATTTAGTCTTTCACCCCTATCTGACA	-6.96314	5.60082	1.47983e-06	0.000407404		TTGCGACCAAACTTAGATCAA	6.8297	5.81487	5.80682e-08	1.51838e-05		TAAAATCGTGTCGAT	7.81816	2.18747	1.0991e-09	3.2607e-07		TTCAAAAACATTTTCAGTAGTC	7.78718	4.70878	9.72059e-07	0.000233478		TGAGATCATGCCAGTGTCATT	-5.88279
ACACCGCCCGTCGCTGC	-10.1709	5.00055	3.3962e-11	9.6351e-09		GTAAAACTCGTTGATGCTTTGCTCT	-9.75599	5.48121	1.25845e-07	3.10283e-05		AAAGTCTTTCGGTTCCGGGGG	6.82184	5.2128	2.24873e-09	7.97846e-07		TGGCAGTGTGGTTAGCTGGTT	9.6675	8.62823	6.3872e-07	0.000135409		CAGTAATTGTTTAATAAAAATATAGCATTTGG	-9.61892	6.39513	1.48571e-06	0.000407404		TACGTCCCTGCCCTTTGTA	-6.29054	7.33911	5.81687e-08	1.51838e-05		TAAACACCACTCTGATCTAC	7.81816	2.18747	1.09903e-09	3.2607e-07		GGTGAATTTAGGGACAGGTCTTCTAAACTTGTTTTGAGCTAGTAAA	-7.91862	4.64691	9.76046e-07	0.000233478		TTTGCGACAGTTGTTGGCTT	-7.29586
GAAAAACAACAAACTAATTAAAGG	11.4138	6.7959	3.43914e-11	9.69919e-09		GCAACATCAACCACCTTCGTCATGT	-9.39187	5.135	1.26509e-07	3.10283e-05		GAACATGTCAACTAAATATGAACTA	-10.3633	5.64809	2.32686e-09	8.20678e-07		GCTGCCCGGAACTGAG	-9.12244	6.24196	6.62895e-07	0.000139702		TCGATTCCCGGTCAACGCACC	-5.14256	7.66474	1.50412e-06	0.000410012		GGTGAAATTCTTGGACCGTAGCGAGACGTCCT	-7.82768	6.74707	5.82123e-08	1.51838e-05		TATTGTTGAAATAAAAGATTTTA	7.81816	2.18747	1.0986e-09	3.2607e-07		TACTGGCCTTCAAACTTCTTAAC	5.11791	5.48929	9.89247e-07	0.000235236		GAATCTTCTGTAATTGTACTTTGTTATC	-9.64779
GGAGAAGTTGTTGGTTGTGGAATCA	11.418	6.79983	3.51652e-11	9.85908e-09		GAACAGTAACTTGACCGAAGTGACT	-9.34429	5.08984	1.28471e-07	3.13242e-05		TTAAAGCTTAGATTAAACGCCT	-10.2492	5.53567	2.37027e-09	8.23659e-07		CGGTTCCGGGG	-7.02007	8.34132	6.71662e-07	0.000140717		GAAATTCTTGGACCGTAGCGAGACG	9.29091	6.21142	1.5477e-06	0.000416849		GTTGGGCTTTGCCCGCGCG	-9.08907	5.36058	5.88478e-08	1.52592e-05		TTTCACAGTAGATTATTGGTAAA	7.81816	2.18747	1.09825e-09	3.2607e-07		GGTGAATTTAGGGACAGGTCTTCTAAACTTGTTTTGAGCTA	-8.08521	4.79829	1.02846e-06	0.000243123		TTCATTGTCCAGCGTTGAACCGA	-6.72917
TCTTGGACCGTAGCGAGACGT	-8.37434	5.09975	3.53963e-11	9.86585e-09		GGGCTTGATTGTCGTTTTGGTACA	-11.3976	7.08106	1.32264e-07	3.1529e-05		GAACAGTAACTTGACCGAAGTGACT	-10.1366	5.42444	2.37676e-09	8.23659e-07		GTTGGGCTTTGCCCGCGCG	-9.02684	6.15199	7.19406e-07	0.000149838		TTTTGTATTGCTGAATTTTTGCTC	-5.26432	8.35622	1.55635e-06	0.000416849		TTTGCGACTGTATCCA	6.16378	6.3495	6.06547e-08	1.54111e-05		ACTGGCTTGTGGCA	7.8738	2.23695	1.19707e-09	3.2607e-07		GATGTTTGAATTTGTGTTGTTTCTGTT	7.76788	4.69219	1.05736e-06	0.000248491		GTACTTCAGAGTGTTTCTCGTCCGA	-9.57688
CGGGCCGGACACTAT	-9.93899	4.7795	3.68022e-11	1.01155e-08		CAAGCGGCCGATTCGGGTTCGATTCCCGATA	-7.34728	6.03077	1.32181e-07	3.1529e-05		AGCAGCCGCG	7.17869	5.02783	2.35236e-09	8.23659e-07		TTAAGTAGTAGTGCCGCAGGTT	6.12027	7.46988	7.30342e-07	0.000150358		TAATTTTTTGTTATATATATA	-7.00858	5.64452	1.54423e-06	0.000416849		GCCCGGAACTGAG	-6.44853	7.1895	6.03621e-08	1.54111e-05		AGAAAGATCAGAGTTGTGTTTA	7.90859	2.27097	1.04884e-09	3.2607e-07		TTTCACAGTAGATTATTGGTA	7.78289	4.70564	1.07158e-06	0.00025037		GAGAAAAAATAATTTTGTTTGGTCGTT	-9.55802
CCCGGAACTGAGCA	-8.0304	6.74617	3.68826e-11	1.01155e-08		GGGTTATTTTAAATCTTAGATTTGA	7.88016	3.04242	1.30247e-07	3.1529e-05		GTTATGATCTCCAATTCTGTCCAGT	-10.1621	5.44981	2.40683e-09	8.29257e-07		CACACCGCCCGTCGCTGCCC	-9.52494	6.61553	7.28001e-07	0.000150358		ACTGT	-4.88261	8.51274	1.65432e-06	0.000438896		TCGGAAACGAAAGTCTTTCGGTTCCGGGGG	-9.0846	5.35623	5.98558e-08	1.54111e-05		TATAAAGATGAAGTTTCGGAT	7.95492	2.31345	1.14338e-09	3.2607e-07		GACGTATTTTTAGACTGTTGTGATTGTT	7.73488	4.66064	1.11308e-06	0.000258563		GTAATTGTGGATTCATTTGAGGAA	-9.74773
GAACTGGCACGGACA	-8.01169	7.56694	3.69289e-11	1.01155e-08		GGGTTATTTTAAAGCTTAGATTTGA	8.04447	3.19215	1.32353e-07	3.1529e-05		GAACTGGCACGGAC	6.90006	4.76254	2.50897e-09	8.59482e-07		GGTGAATTTAGGGACAGGTCTTCTAAACTTGTTTTGAGCT	7.13779	6.157	7.35385e-07	0.000150526		ACTCGATT	-5.60998	6.6502	1.65772e-06	0.000438896		AAAGTCTTTCGGTTCCGGGGGAAGTATGGTTGCA	-9.10511	5.37449	6.0832e-08	1.54111e-05		GCACCGGAT	7.95492	2.31345	1.14473e-09	3.2607e-07		GAAGTTGATTTATCTTGGAATTGTATT	7.70138	4.63357	1.15154e-06	0.00026512		ATGGCACTGAATGAGCTCACG	-6.01342
ATTCTTGGACCGTAGCG	-8.16783	5.67962	3.82166e-11	1.03121e-08		GTTATGATCTCCAATTCTGTCCAGT	-9.37454	5.11872	1.41037e-07	3.33053e-05		GATTTTTTTGTAGTTCGTTTTGAAGGT	-10.1118	5.39969	2.6102e-09	8.85331e-07		GCCCTTAGATGTCCG	-6.33355	7.13035	7.40863e-07	0.00015078		TAAGTC	-4.80858	8.3478	1.67192e-06	0.000440126		TGGCAGTGTGATTAGCTGGTTG	7.4835	9.95275	6.28358e-08	1.58278e-05		TTTCAAAATTTGTTAAGGAAGA	7.95492	2.31345	1.14505e-09	3.2607e-07		GGGTTATTTTAAAGCTTAGATTTGAA	-8.55626	5.23908	1.1545e-06	0.00026512		CACTGT	-5.41077
TTCGGTTCCGGGGGAAGTA	-8.12401	6.83964	3.82956e-11	1.03121e-08		TGGCAGTGTAGTTTGCTGGTTG	8.36752	5.03151	1.41417e-07	3.33053e-05		ATGTCTGGCG	9.4416	4.23644	2.61414e-09	8.85331e-07		TGAATGCACCGGATCCCGTCC	-7.25175	7.15141	7.4616e-07	0.000150996		GGGTTATTTTAAAGCTTAGATTTGAA	-9.2576	6.03272	1.68268e-06	0.000440441		GGGCTTGATTGTCGTTTTTGTACACT	9.16618	5.34109	6.64367e-08	1.65457e-05		GAAAGATCAGAGTTGTGTTT	7.95492	2.31345	1.14835e-09	3.2607e-07		CAGTAATTGTTTAATAAAAATATAGCATTTGG	-8.94299	5.61101	1.23835e-06	0.000282758		GACTTTATCCAGAATCGCTTTTAGGACT	-9.57721
TGGACCGTAGCGAGA	-7.23438	6.75539	3.82803e-11	1.03121e-08		CAACAGCTCATTAAACTGCCTC	7.22755	2.47567	1.42395e-07	3.33461e-05		GTAAAACTCGTTGATGCTTTGCTCT	-10.5376	5.81981	2.63189e-09	8.85739e-07		TTAAGTAGTAGTGCCGCAGGTTG	5.46751	8.59133	7.68818e-07	0.000153833		GAGACCTCCTGGG	6.71574	6.95985	1.74234e-06	0.000450933		TTTGCACCTTATTCAATCACCA	6.69054	5.73557	6.63162e-08	1.65457e-05		AAAGATCAGAGTTGTGTTTAT	7.99372	2.35029	1.19224e-09	3.2607e-07		GGTGAATTTAGGGACAGGTCTTCTAAACTTGTTTTGAGCTAGTAA	-7.88926	4.61922	1.24579e-06	0.00028285		TCCCATGTAGTCTAGTGGTTATGATTTGCGGCTCTC	-5.88184
TGCCCGGAACTGAGCA	-8.64969	5.36081	3.92463e-11	1.05087e-08		GGTGAATTTAGGGACAGGTCTTCTAAACTTGTTTTGAG	5.17376	4.54501	1.45737e-07	3.3937e-05		GCATATACTTTTTGTTTGGCGGAAA	-10.1559	5.44376	2.7045e-09	8.85739e-07		TTAGGGTTCGACTCCGGAGAGGGA	-7.24832	7.14813	7.68544e-07	0.000153833		TAAAATCGTGTC	-4.73174	11.4433	1.74229e-06	0.000450933		ATAGGAAATGAATCAGGAGAGA	6.59828	6.18501	6.69922e-08	1.65903e-05		ATTTGCTTATGTTTCCACGATCAA	7.99372	2.35029	1.19314e-09	3.2607e-07		TTTGCGACTAATCCAGGCCACAA	5.54117	8.32984	1.25308e-06	0.000282907		AATATCTGAATTGTTTACAAGAC	-5.92688
ACTCCGGAGAGAGA	-9.92245	4.7612	3.96524e-11	1.05582e-08		GTAACAATTTGATTTTGAGCTTTCG	-9.34105	5.08706	1.49199e-07	3.45492e-05		GTAACAATTTGATTTTGAGCTTTCG	-10.1309	5.41906	2.69072e-09	8.85739e-07		TCTTGGACCGTAGCG	-6.25043	7.58474	7.78836e-07	0.000154967		TATCTGATT	-4.81134	8.52135	1.7537e-06	0.000451339		CGAATCCTGCTGACTGCGAATTGTTTT	6.46905	6.05778	6.94684e-08	1.71075e-05		ATATCGACGTTGCT	8.36268	2.7	1.02735e-09	3.2607e-07		CAAAAACATTTTCAGTAGTCA	7.79768	4.71895	1.28041e-06	0.000287462		GGATTTATTTCTTCACCTATTGTCGCT	-9.55901
TACGTCCCTGCCCT	-9.70864	4.5575	4.21511e-11	1.11453e-08		GAAATTATCTATAGGTACTGATGCT	-9.40991	5.15252	1.54123e-07	3.54912e-05		GCATAACTGAACATTAAAAATAAAATT	-10.0612	5.35019	2.67161e-09	8.85739e-07		CCGGATCCCGTCC	-5.9396	7.66794	7.89084e-07	0.000156018		GGTGAATTTAGGGACAGGTCTTCTAAACTTGTTTA	-7.67391	6.25313	1.78778e-06	0.000457551		AAAGTCTTTCGGTTCCGGGGG	-6.39722	7.13674	7.00827e-08	1.71629e-05		CATAGACTATTCTGAAATTGT	8.41775	2.7612	1.18083e-09	3.2607e-07		GTAAAACTCGTTGATGCTTTGCTCTA	7.68082	4.616	1.32609e-06	0.000296064		GAAGTTGTTTTATCTCTGTAGTTAATT	-9.55901
GCCCGTCGCTGCCCG	-7.88292	5.3506	4.2325e-11	1.11453e-08		GCATATACTTTTTGTTTGGCGGAAA	-9.3694	5.11387	1.5801e-07	3.57896e-05		AGTTGCCGGTAACAGAAACTGTTTTT	-8.08923	6.12433	2.68964e-09	8.85739e-07		TAGTACTTGGATGGGAGACCTCCTGGGAACCGTTAGT	-9.04185	6.1653	7.92879e-07	0.000156018		GATTCCGTA	-5.0027	9.40389	1.82389e-06	0.000461665		TCTTGGACCGTAGCGA	-5.99795	7.51549	7.05227e-08	1.71752e-05		ACAGCGGGGAA	5.42655	2.19304	1.21464e-09	3.26426e-07		ACTGTT	-5.5882	4.46631	1.34731e-06	0.000299141		TCACTGT	-5.26935
TTTCGGTTCCGGGGGAAG	-8.36109	5.08759	4.59335e-11	1.2029e-08		GCATTGACGATTTTCTTGTAGACTATT	-6.96597	5.66295	1.57999e-07	3.57896e-05		GTTAGTGGCGT	9.3366	4.13929	2.67319e-09	8.85739e-07		CTTTCGGTTCCGGGGGA	-6.23842	8.27062	8.1369e-07	0.000159233		GGTGAATTTAGGGACAGGTCTTCTAAACTTGTTTTGAGCTAGTAACTCATTCACT	-6.0976	6.32037	1.81949e-06	0.000461665		GATTACGTCCCTGCCCTTTGT	-6.31491	7.05745	7.37443e-08	1.78611e-05		ATTGCACATAGACTATTCTGA	8.25549	4.24071	1.2107e-09	3.26426e-07		GCGGGTTT	-4.90417	5.44872	1.41598e-06	0.00031266		TTTGCACTTAGATACCTGACTACC	-5.92706
ACGTCGGGTTCACCA	-7.82978	6.11445	4.63133e-11	1.20622e-08		GCTGGTTG	5.61147	2.49936	1.57964e-07	3.57896e-05		GGATCCCGTCCGATCTCCG	9.28409	4.09089	2.77521e-09	9.03931e-07		GAAAGTCTTTCGGTTCCGGGGGAAGTA	-6.30306	7.63617	8.33068e-07	0.000162134		CAGTAATTAGTTTAATAAAAATATAGCATTTGG	-9.69481	6.47146	1.83396e-06	0.000461676		TTAGGGTTCGACTCCGGAG	-6.9737	7.30882	7.45145e-08	1.7949e-05		GTCTTACGCTCATGTCC	6.33408	3.03356	1.23479e-09	3.30026e-07		TATATCCATAAACACCACTCT	5.80644	5.28911	1.42959e-06	0.00031394		TATCCATAAACACCACTCTGA	-6.38325
AACGGGGGCATTCGTATCGCTACGTTAGA	-9.6814	4.53143	4.7314e-11	1.22559e-08		GTATCTTAAGCATCCTTTGCGTCGC	-9.27141	5.0208	1.60231e-07	3.60955e-05		GATTGATTTGTATGATTGAAATATTGG	-10.0523	5.34144	2.82087e-09	9.1381e-07		TTGGATGGGAGACCTCCTGGGAAC	-9.05282	6.17517	8.54141e-07	0.000165332		TCCCATATGGTCTA	-5.45551	6.64854	1.8722e-06	0.000468742		TGGCAGTGTAGTTAGCTGGTTGA	9.04988	5.22775	7.8499e-08	1.88061e-05		TTTGCGACTGTATCC	5.73763	4.23696	1.24635e-09	3.31305e-07		TGGCAGCGTAGTTAGCTGGTTG	-4.94521	5.47935	1.53209e-06	0.00033462		TTTGCACCTTATTCAATCACC	-6.84858
CCCGCTGAACT	-8.29662	5.01835	5.00415e-11	1.28923e-08		GATTGATTTGTATGATTGAAATATTGG	-9.26221	5.01227	1.64489e-07	3.68545e-05		GAAATTATCTATAGGTACTGATGCT	-10.1998	5.48713	2.87784e-09	9.21256e-07		TGGCCGTGTAGTTAGCTGGTTG	9.21326	6.25889	8.8039e-07	0.000169492		GGATCCCGTCC	5.69158	7.41253	1.92325e-06	0.000472785		TCTATATGTTGAGAATACTTTCTGAACT	7.47186	9.11378	8.09936e-08	1.9099e-05		CGGTTCCGGGG	6.07874	2.07791	1.25723e-09	3.32391e-07		GTAGGTGTAGTAGAATTATTTTT	7.86334	4.77678	1.54809e-06	0.000336287		TGTAATTTTTTCACCTGTCTT	-9.55918
ACTCCGGAGAGGG	-8.26879	4.99167	5.28741e-11	1.34959e-08		TGGCAGTGTGATTAGCTGGTTGAAGAAACTAAGAAATTCAACAGCTCATTAAACTGCCTC	5.56214	2.4586	1.65771e-07	3.69419e-05		GTATCTTAAGCATCCTTTGCGTCGC	-10.064	5.35284	2.89023e-09	9.21256e-07		ACCGTAGCGAGACGTCCT	-7.27662	7.16179	8.87435e-07	0.000169929		TTTGCGACTGGATCCAGGCCATA	-5.45891	6.30332	1.9294e-06	0.000472785		GGGGATATAGCTCAGTGGTAGAGCATGTGACTGC	5.57	8.63044	8.10577e-08	1.9099e-05		CGCGCGCT	5.6171	3.51748	1.27417e-09	3.35059e-07		TTTGGCACCATGGGACTCTA	-5.46873	5.09871	1.558e-06	0.000336619		GTTTGATTGATTGTTCTTTGATTGATT	-6.893
CGTAGCGAGACGTCCT	-7.61374	5.65322	5.29505e-11	1.34959e-08		GTTAAGAAGCTTAATATCGTTATGACT	-6.96662	5.66347	1.66943e-07	3.70041e-05		GACCGTAGCGAGACG	6.67852	5.06859	2.86708e-09	9.21256e-07		GTGCGGTGATTAAGAGAATTTCTGAGCTTA	7.19784	7.04845	8.99404e-07	0.0001713		TGGCAGTGTGGTCAGCTGGTTG	-6.9211	5.51296	1.90262e-06	0.000472785		TCGGAAACGAAAGTCTTTCGGTTCCGGGG	-9.02326	5.29928	8.14549e-08	1.9099e-05		AGCGGGG	6.67565	2.65947	1.31598e-09	3.43497e-07		GAAAAAATCGTTTTACTATCTTATGTT	7.6415	4.58478	1.58757e-06	0.000339845		GGGAGTTTGACTGGG	10.0576
GAAAGTCTTTCGGTTCCGGGGGAAGT	-10.9577	7.65658	5.45735e-11	1.38355e-08		GTGACGTCTTTTCTGATTGTAGGACA	-9.34793	5.09279	1.69897e-07	3.72604e-05		GAAGCATTCTTTAATTGATCGGTTGTA	-10.0435	5.33273	2.94495e-09	9.33707e-07		TACCCGTAATCCAATGCTGCA	5.38788	9.87123	9.17582e-07	0.000172913		TGAGGGTGATAT	-7.1037	5.73875	1.90926e-06	0.000472785		AGAACTGGCACGGACAAGAGGA	-9.052	5.32509	8.01769e-08	1.9099e-05		TTTCGGATATACAGAATATGG	7.85436	2.22258	1.3203e-09	3.43497e-07		GGTGAATTTAGGGGCAGGTCTTCTAAACTTGTTTTGAGCTAGTAACTCA	-7.85929	4.59099	1.58984e-06	0.000339845		GATTTCGTCGTGTAGTCGGTTATCACATCTGTCTG	-6.44666
ACCGCCCGTCGC	-8.2364	4.9605	6.09203e-11	1.53087e-08		GAAGCATTCTTTAATTGATCGGTTGTA	-9.25261	5.00321	1.69138e-07	3.72604e-05		GTGACGTCTTTTCTGATTGTAGGACA	-10.1348	5.42234	2.96626e-09	9.35486e-07		GCCCGTCGCTGCCCGGAAC	-6.13633	8.17194	9.13798e-07	0.000172913		GGGAGTTTGACTGGG	6.71547	6.95964	1.94717e-06	0.000474616		GAAATATATATATAGG	5.80772	6.50663	8.26869e-08	1.92054e-05		CCGGAGAGGGA	6.3562	2.36429	1.35155e-09	3.46103e-07		GGTGAATTTAGGGACAGGTCTTCTAAACTTGTTTAAA	-7.89455	4.6229	1.60584e-06	0.00034145		TGAGATTCTCTTTTCTTCATT	-6.00821
AAGGGAAGTCGGCA	-7.0998	5.49304	6.10267e-11	1.53087e-08		GAACATGTCAACTAAATATGAAC	-9.49274	5.23144	1.73102e-07	3.75658e-05		TTGGGCTAGAATGTATTTACC	-10.0961	5.38461	3.04877e-09	9.37177e-07		TTTGCGACCCAATCCAGGCTA	6.18708	7.96177	9.68653e-07	0.000181577		GGTGAATTTAGGGACAGGTCTTCTAAACTTGTTTTGAGCTAGTAACTC	-8.88733	5.66144	1.96132e-06	0.000475549		GAGGTGAAATTCTTGGACCGTAGCGAGACGTCCTAC	-6.89483	6.70709	8.278e-08	1.92054e-05		CAAAAACATTTTCAGTAGTCAA	7.72845	2.10439	1.33944e-09	3.46103e-07		CAGTAATTAGTTTAATAAAAATATAGCATTTGG	-9.02817	5.69328	1.66279e-06	0.000351698		TCGAGTCCCATCGGAATCGTCAACCTTTT	-6.5664
CCTGCCAGGATCGCCA	-5.91206	7.86111	6.21766e-11	1.55155e-08		CTGGCAGTGTAGTTAGCTGGTTG	5.46305	2.40935	1.72987e-07	3.75658e-05		GATTTTCAGAAACCATAAGACCGTTTT	-10.0645	5.35359	3.00842e-09	9.37177e-07		TTATTGCTTGAGAATACTGAT	9.22986	6.2749	1.04068e-06	0.00019371		CGACTCCGGAGAGG	9.23272	6.15813	1.99578e-06	0.000481369		TATATCCCAATGGTGATCAAG	9.03462	5.21292	8.43793e-08	1.94729e-05		CGGATATACAGAATATGGCTA	7.77406	2.1465	1.34628e-09	3.46103e-07		GTTAAAATAAAAACTGATCGAGTAATT	7.75258	4.67353	1.68673e-06	0.000353831		GAAGTAGAATTATTTGATTGGAGAAGG	-9.54092
GACCGTAGCGAGACGTCC	-9.62547	4.47829	6.27615e-11	1.55799e-08		TTGCGTGTGGGAGGGATGCGTTCGCGCACTCTCCCGA	5.10652	3.51415	1.78894e-07	3.86206e-05		GGGTTTCACGTCA	7.00727	5.32959	2.98826e-09	9.37177e-07		TTGGCAGTGTAGTTAGCTGGTTG	9.10413	6.15314	1.05317e-06	0.00019371		TACCCGTAGTCCAACGCTGTCA	-5.54816	6.56452	2.02942e-06	0.000486933		TTTGCAACTTCATCCATTGCACA	6.5568	5.60531	8.48395e-08	1.94729e-05		TTTGCGACTGTATTCACATCAC	5.32623	3.67657	1.3649e-09	3.46761e-07		GAGTTTTTAAATTCGTCATCAATAACT	7.62946	4.57337	1.69048e-06	0.000353831		GTTTGTGTTGTACTAGAACTAATACTC	-9.59567
TTACGTCCCTGCCCTTTGTA	-8.42623	5.93403	6.38967e-11	1.57795e-08		CAGTAATTTGTTTAATAAAAATATAGCATTTGG	6.82675	3.61601	1.82044e-07	3.9097e-05		GTGAAATTCTTGGACC	7.06971	4.91796	3.05024e-09	9.37177e-07		AGTCTTTCGGTTCCGGGGGAA	-5.92018	7.64853	1.0459e-06	0.00019371		TTTTGGAGGCTCTCCTTCGGGGGAGCGAT	-5.22467	6.92076	2.0557e-06	0.000490683		TGAGATTCTCTTTTCTTCATTCAA	6.0414	5.94828	8.55303e-08	1.94729e-05		TCCCTGAGACTCTCCTTGTG	8.33609	2.67998	1.3683e-09	3.46761e-07		GTTGATAAGTAACTAACCATTGTTGGC	7.65799	4.5994	1.77502e-06	0.000367902		GGCATTTTCAAAATATTTAGCATTGTC	-9.59567
TTGGATGGGAGACCTCCTGGGAACCGTT	-9.92564	4.76392	6.5279e-11	1.60378e-08		GAAGAATAATCTGTGAAAGTCAAA	-9.35232	5.09778	1.85007e-07	3.93991e-05		GCAGCCGCG	9.52269	4.31179	3.02492e-09	9.37177e-07		ACTGGCGACGTGG	-9.03296	6.1564	1.05514e-06	0.00019371		CCTGGGAACCGTTAGTG	9.22547	6.15141	2.10932e-06	0.000500886		TACGTCCCTGCCCTTTGTACACA	-6.69431	7.42375	8.57002e-08	1.94729e-05		CCCAGGATA	6.05319	2.08462	1.39263e-09	3.49307e-07		TCATTTTATGATTGCGTTATA	7.65799	4.5994	1.77602e-06	0.000367902		TTCTGGGATTGTTTATCTTGGTA	-6.4344
TGGACCGTAGCGAGACGTCCTACTGCG	-9.72574	4.57481	6.59809e-11	1.60448e-08		GGTGAATTTAGGGACAGGTCTTCTAAACTTGTTTTGAGCTAGTAAA	5.86034	3.4422	1.85352e-07	3.93991e-05		GTGTAGGCTGGC	7.37856	4.40838	3.15936e-09	9.65727e-07		TGGACCGTAGCGAGA	-6.08902	8.56201	1.06809e-06	0.000195082		GGTGAATTTAGGGACAGGTCTTCTAAACTTGTTTTGAGCTAGTAACTCATTCACTT	-5.66765	6.45411	2.15438e-06	0.000508964		GTTGTTGT	9.01927	5.19798	8.63683e-08	1.95241e-05		TGAGATCATGTTAAACTCATAT	6.40953	2.37228	1.38751e-09	3.49307e-07		GTTAAGAATAG	4.39867	5.98721	1.799e-06	0.000368859		AAAAGAAAGATCAGAGTCGTG	-9.52226
AGCTGGACCAGG	-7.79202	5.77997	6.58379e-11	1.60448e-08		GAATAGTCTGGGTATGAAACTGGTGT	-9.29157	5.03925	1.94104e-07	4.10489e-05		TTTGGGATCGAATTAACCAATA	-7.73777	7.20158	3.17993e-09	9.67056e-07		TCCCTGAGATTTCGTATAACCGGA	9.28922	6.3325	1.09994e-06	0.000199874		GGTGAATTTAGGGACAGGTCTTCTAAACTTGTTTTGAGCTA	-8.83309	5.60718	2.21579e-06	0.000520802		GACAGCAGGGCG	-5.84302	7.15618	8.95053e-08	2.013e-05		AAGGAAGATTTTTTATTAGAT	7.96126	2.31811	1.40829e-09	3.49918e-07		ACAGCTCACTCAACTGCCAT	-5.34121	4.99417	1.79696e-06	0.000368859		TCGATTCCCGGTCAACGCACC	-5.41017
TTAGGGTTCGACTCCGGA	-9.60049	4.45396	6.81353e-11	1.64846e-08		TCCGGA	7.84288	3.00753	1.96283e-07	4.12991e-05		GAACATGTCAACTAAATATGAAC	-10.28	5.5664	3.32954e-09	9.8554e-07		CGATAAACGCACCA	-6.22844	7.56349	1.12639e-06	0.000203331		TTAGTTGGATAACTGAGGTAATTCTTGAGCTAATACACGCTTT	-5.4492	6.26757	2.30604e-06	0.000536538		TTTGTATTGCTGAATTTTTGCT	6.37567	5.91641	9.06151e-08	2.02762e-05		TAGGGGCG	7.96126	2.31811	1.40937e-09	3.49918e-07		CGGCAGTGTGGTTAGCTGGTTG	-7.78619	4.52513	1.82497e-06	0.000372284		GAGCTATGATGTAACTATAATGAGCCTGATCTATTTGATGTGAACTCCGCTTCTGAGCTCT	-5.29286
CGCCCGTCGCTGCC	-7.68209	5.15625	7.01261e-11	1.68806e-08		TAATTTTTGCGTGTGGGAGAGATGCGTTCGCGCACTCTCCCGA	5.4553	2.40316	1.97835e-07	4.14154e-05		GAAAGCTGTGTTCAAAATTCTGACATT	-10.2744	5.56016	3.38952e-09	9.8554e-07		GAGGTGAAATTCTTGGACCGTAGCGA	-9.01549	6.14332	1.13038e-06	0.000203331		TTTGCGACCTATTCATGATCA	-5.8424	8.02397	2.30563e-06	0.000536538		TGATATGTCTGGTATTCTTG	6.64113	6.28234	9.28647e-08	2.06746e-05		TTTCACCTGTCTTTCCAAGA	8.41782	2.74835	1.46603e-09	3.62145e-07		GGCAGTGTAGTTAGCTGGTTG	-5.52182	5.14702	1.89555e-06	0.000384731		TTTGCGACTGTATTCACATCACT	-5.3635
CGGTTCCGGGGGAAG	-8.12345	5.63783	7.07989e-11	1.69569e-08		GGGCTTGATTGTCGTTTTGGTACAC	-9.23453	4.98597	2.01023e-07	4.18713e-05		GAAAATCTCCGTTGTTCCTATGTAGAA	-10.0448	5.3342	3.28214e-09	9.8554e-07		CGGTTCCGGGGGAAG	-6.6424	7.43691	1.14887e-06	0.000205619		ATGTCTGGCG	9.24513	6.17031	2.38674e-06	0.000552525		TGAGATTCTCTTTTCTTCATTCA	5.90263	7.6661	9.40237e-08	2.08274e-05		TTTTGTATTGCTGCATTTTTGCT	5.36664	2.14285	1.5077e-09	3.66028e-07		TTTGAAACTTCATCTTTGTAGA	7.70808	4.63578	1.9286e-06	0.000389472		ATATAGGTTGGAG	-9.46372
TACGTCCCTGCCCTTTGTACACACCGCCC	-9.78057	4.62489	7.53681e-11	1.7961e-08		GATACTATCTGACCTTTTTGAAACA	-9.20975	4.96254	2.02251e-07	4.19165e-05		GGGCTTGATTGTCGTTTTGGTACAC	-10.0225	5.31201	3.37262e-09	9.8554e-07		GATACCGCCCTAGTT	-8.87976	6.0169	1.15515e-06	0.000205709		CAGAACTGGCGACG	9.15761	6.09	2.40385e-06	0.000553703		ACTGGCACGGACAAGAGG	-7.14819	6.09484	9.57242e-08	2.10981e-05		GCTTGACTCT	6.08595	2.08293	1.56185e-09	3.66028e-07		GGTGAATTTAGGGACAGGTCT	-5.4306	5.09849	2.10214e-06	0.000422394		GGAACTGAGCAATATCG	9.95883
CGGGCTTGGCA	-7.50761	5.49911	8.05959e-11	1.91112e-08		TGGCAGTGTGATTAGCTGGTTGA	5.50041	8.0116	2.03755e-07	4.20182e-05		ACCGCCCGTCGCT	7.41818	4.43703	3.33371e-09	9.8554e-07		GGTGAATTTAGGGTCAG	9.00278	6.05526	1.17799e-06	0.000206676		TTTGCGACCTATTCATGATCAA	-6.10415	7.05811	2.43674e-06	0.000555988		AGGTTGGAGA	6.19306	7.13768	9.83947e-08	2.15788e-05		TGAAAGACGTTCTTTATCTCT	6.34292	2.34638	1.51153e-09	3.66028e-07		TTGGCAGTGTAGTTAGCTGGTTG	-4.86295	5.65493	2.11329e-06	0.000422521		TGGACTGGATAGTTGCAAACA	-5.30469
ATGTCTGGCGGGGA	-8.22322	5.74029	8.25922e-11	1.94877e-08		GCCTCATTAGTTCAGTTGGATAGAATGTATG	-6.11775	5.71365	2.06303e-07	4.21244e-05		GTGAAATTCTTGGACCGT	7.42808	4.44627	3.27975e-09	9.8554e-07		GGTGAATTTAGGGGCAGG	6.80511	6.59785	1.17561e-06	0.000206676		TAAATTCGAATCTGACAATA	-6.86313	5.50344	2.43791e-06	0.000555988		GATTTCGTCGTGTAGTCGGTTATCACATCTGTCTG	6.59114	5.63886	9.91353e-08	2.16336e-05		CCGCCCGTCGC	7.66766	2.05093	1.53506e-09	3.66028e-07		TTTGTAATTGGAAGAAAAGAA	7.69021	4.62811	2.17028e-06	0.000431767		TGTCACTGT	-5.34611
AATTCTTGGACCGTAGCGAGACGTCC	-9.54268	4.3991	8.53829e-11	2.00469e-08		GGGTTATTTTAAAACTTAGATTTA	4.87743	5.36209	2.05585e-07	4.21244e-05		AAAACAGCGGG	7.43538	5.2841	3.38417e-09	9.8554e-07		GGGTTCGACTCCGGAGA	-9.03143	6.15479	1.16898e-06	0.000206676		GCGCAAAGTTGGT	6.49298	6.75144	2.55729e-06	0.00057468		TGCTATGATAGATTTGTTATCCCTGTCTGAAC	6.35396	5.94538	1.01217e-07	2.19791e-05		TGGAAGAAAAGAAAGATCAGAG	7.67441	2.05602	1.56466e-09	3.66028e-07		TATAAAGATGAAGTTTCGGATA	7.55868	4.51399	2.25949e-06	0.000447302		GAATAGTTTCTGTAACCTGATAAAGTT	-7.69733
GTTCCGGGGGAA	-8.54265	5.26596	8.66717e-11	2.02497e-08		GTTATTCTTTTACTGTTCGTGTCGA	-9.20304	4.95659	2.1417e-07	4.35164e-05		GATGGGAGACCTCCTGGGAACCGTTAGTG	9.181	3.99624	3.298e-09	9.8554e-07		GCCCTTAGATGTCCGG	-8.7755	8.61578	1.19458e-06	0.00020856		GAACGGGCTTGGC	5.33689	8.02452	2.53929e-06	0.00057468		TCGAATCCTGCCAGGATCGTTATCTTT	8.97207	5.15212	1.02879e-07	2.21219e-05		ATTTCAGAACAGTCTATGTGC	7.67441	2.05602	1.56608e-09	3.66028e-07		AAACAAATTGAAGAAAACACTGAATTTC	7.57141	4.52598	2.38849e-06	0.00047052		CGAGTCCCATCGGAATCGTTGACCTTTT	-6.8155
TACGTCCCTGCCCTTTGTACACACC	-8.04611	5.56123	8.94747e-11	2.08026e-08		GTTAAGAATCTTGAATGAACGATGGT	-9.20979	4.96301	2.25739e-07	4.56434e-05		ATATCGACGTTGCT	9.36227	4.16298	3.38827e-09	9.8554e-07		CTTTCGGTTCCGGGGGAAGTA	-7.03423	6.93173	1.21687e-06	0.000211414		GGTGAATTTAGGGACAGGTCTTCTAAACT	-8.49144	7.06606	2.55436e-06	0.00057468		ATAGGTTGGAGAA	5.85499	6.51766	1.02828e-07	2.21219e-05		CATAAACACCACTCTGATCTACC	7.72175	2.09939	1.55521e-09	3.66028e-07		TGTATTTTAACATCTTTCTTA	7.60988	4.5536	2.48654e-06	0.000486612		GATTTCGTCGTGTAGTCGGTTATCACATCTGTCTGA	-6.94809
CCTCCTGGGAACCGTTA	-9.61629	4.47023	9.05011e-11	2.0838e-08		TGGCAGTGTGGTTAGATGGTTG	7.49468	2.69977	2.2933e-07	4.61444e-05		GAATAGTCTGGGTATGAAACTGGTGT	-10.0847	5.37271	3.67651e-09	1.03369e-06		AGTCTTTCGGTTCCGGGGGA	-5.99758	8.02961	1.24239e-06	0.0002148		TTTACGACCTTATCCGTGTCACT	-6.12581	5.53608	2.59364e-06	0.000580018		ACACACCGCCCGTCGCT	-7.63934	6.56074	1.03785e-07	2.22084e-05		CCCGTCCG	7.72175	2.09939	1.55439e-09	3.66028e-07		TTATTGCTTGAGAATACTGAT	-4.99732	5.77881	2.49439e-06	0.000486612		GAGTGAATGTTGTGGAAGATTGTTGTC	-9.44491
TTCTTGGACCGTAGCGAGACGTCCT	-8.17906	4.90504	9.01323e-11	2.0838e-08		GACAAAATTTGTCTGTGACGTGAACT	-9.26214	5.01262	2.34037e-07	4.68639e-05		GATACTATCTGACCTTTTTGAAACA	-10.002	5.29169	3.60598e-09	1.03369e-06		GGGTTATTTTAAAACTTAGATTTAAA	9.14219	6.19135	1.25508e-06	0.000214908		AGCTGGTTAGCTTAAATAAAAGCTCCTGACTTTTAATCGGGTGATGGGTTTCCCACTGGCTACCA	-5.59367	6.63189	2.70346e-06	0.000601657		GTAATATTCGGAAAGCGTTTTTTA	8.95599	5.13651	1.06382e-07	2.26542e-05		AGGGCGGT	7.88038	2.24174	1.56797e-09	3.66028e-07		GATTTCGAATGAACTGTATATTTTACT	5.11525	5.51359	2.51809e-06	0.000488862		GACACAAATTATAAAGAAGATCTTCCT	-7.56823
GTAATTGTGGATTCATTTGAGGAA	11.198	6.582	9.1106e-11	2.08764e-08		TCCCTGAGATTTCGTATAACCGG	5.64734	4.52271	2.39737e-07	4.77745e-05		GTTATTCTTTTACTGTTCGTGTCGA	-9.99335	5.2835	3.64944e-09	1.03369e-06		GGTGAATTTAGGGACAGGTCTTCTAAACTTA	9.03823	6.08941	1.25317e-06	0.000214908		TGCCACGCGG	9.11931	6.05516	2.73976e-06	0.000602305		TCCCTGAGACTCTACTTGTG	8.65033	9.22868	1.07818e-07	2.28495e-05		TACCTCACATAATATCGTCAAT	7.88038	2.24174	1.5723e-09	3.66028e-07		GGCGGTT	7.57328	4.52446	2.55579e-06	0.000493796		GGAGAAGTTGTTGGTTGTGGAAT	-9.4246
GCACCTTCTCGGAAAC	-9.71184	4.56183	9.43212e-11	2.12054e-08		GAAGTTGTTTTATCTCTGTAGTTAATT	-6.86344	5.56497	2.41457e-07	4.7887e-05		TGTCACTGACGAATGGTTTCTAACTGAGTTG	-8.35944	5.59805	3.6481e-09	1.03369e-06		TGGCAGTGTGGTTCGCTGGTTG	11.5594	8.57287	1.28254e-06	0.00021856		GTGAAATTCTTGGACCGTAGC	5.65638	7.35954	2.73923e-06	0.000602305		GAAAGTCTTTCGGTTCCGGG	-6.36257	7.8689	1.08357e-07	2.28541e-05		GTTGGATTGTTC	7.88038	2.24174	1.57903e-09	3.66028e-07		ATCTTTGTAGATGTATTTTAA	7.60584	4.55639	2.62036e-06	0.00050385		GAACTGTATATTTTACTCTCTTAATATT	-9.42496
TGGCGGGGAGTTT	-9.66099	4.51072	9.41632e-11	2.12054e-08		GAAATCCAATCGATATCGTGCTTAG	-9.41655	5.15896	2.47304e-07	4.79006e-05		AGTCTTTCGGTTCCG	6.84156	4.70787	3.61577e-09	1.03369e-06		TCCCTGAGACTCTACTTGTGAC	6.64881	7.67313	1.30215e-06	0.000220844		GGTGAATTTAGGGACAGGTCTTCTAAACTTGTTTTGAGCTAGTAAA	-8.6911	5.46489	2.74559e-06	0.000602305		GAAAGTCTTTCGGTTCCGGGGGAAGTATGGTTGC	-9.29041	5.55231	1.0923e-07	2.29284e-05		GAAGTTGTAGAGAAGATGTTA	8.03757	2.39077	1.57625e-09	3.66028e-07		ACAGCTCACTCAATTGCCATG	-7.67521	4.42484	2.7283e-06	0.000522105		TTTGCGACTAATCCAGGCCACA	-5.27573
AGCAGGGCGGTG	-9.51942	4.37698	9.41446e-11	2.12054e-08		GTCGCGATGGCCGAGCGGTCTAAGG	-7.26579	8.89398	2.44916e-07	4.79006e-05		ACCATGTCTGGCGG	7.31387	4.34817	3.64816e-09	1.03369e-06		TGGCAGCGTAGTTAGCTGGTTG	8.93103	5.98615	1.31344e-06	0.000221703		GCCTGTCACGTGCGAGACCG	9.84777	6.72685	2.83767e-06	0.000614187		TTCGGATATACAGAATATGGC	8.98786	5.16747	1.1186e-07	2.30642e-05		ATATCCATAAACACCACTCTG	8.03757	2.39077	1.57752e-09	3.66028e-07		CAGTAATTGTTTAATAAAAATATAGCATTTGGA	-5.80609	4.61794	2.74464e-06	0.000522744		TTTGCGACCAAACCAGATCAA	-5.50378
ACACCGCCCGTCGCTGCCC	-7.81253	5.84935	9.36589e-11	2.12054e-08		GGTGAATTTAGGGACAGGTCTTCTAAACTTGA	5.39859	2.98716	2.46026e-07	4.79006e-05		GAATGCACCGGATCCC	7.33017	4.36339	3.66094e-09	1.03369e-06		ATAGGTTGGAGAATG	9.0391	6.0902	1.32067e-06	0.000221873		TGTCACTGT	-4.73961	9.30448	2.83975e-06	0.000614187		TTGCACATAGACTATTCTGAAA	8.98786	5.16747	1.1197e-07	2.30642e-05		CAGTTGCGAGCT	5.31293	2.09582	1.5967e-09	3.68378e-07		TGGCCGTGTAGTTAGCTGGTTG	-4.71016	5.76998	2.79872e-06	0.000528039		GAGAGGGCTGGG	10.1269
GCGGGGAAA	-8.16806	4.90039	9.48212e-11	2.12177e-08		GGTGAATTTAGGGACAGGTCTTCTAAACTTGTTTTGAGCTAGTAACTCAT	5.76404	7.43703	2.44871e-07	4.79006e-05		GAAGAATAATCTGTGAAAGTCAAA	-10.1458	5.4337	3.73696e-09	1.04575e-06		TCGATTCCCGGTCAACGCACC	6.04851	7.3138	1.33189e-06	0.000222708		TTTGGCACCATGGGACTCTAA	-4.9923	7.81314	2.81948e-06	0.000614187		TTGGGAACATGTCCAGAACCTT	7.2463	5.44004	1.11735e-07	2.30642e-05		CACGGACC	6.27362	2.97596	1.60873e-09	3.69242e-07		CAGTAATTGGTTTAATAAAAATATAGCATTTGG	-8.56737	5.24735	2.7903e-06	0.000528039		AATGTTATCCGTTTGTTATCT	-9.44527
ACTGGCACGGACAAGAGG	-7.53128	5.06526	9.66811e-11	2.15328e-08		TGGCAGTGTGCTTAGCTGGTTG	7.17483	2.43093	2.47244e-07	4.79006e-05		GTTAAGAATCTTGAATGAACGATGGT	-9.99792	5.28807	3.79839e-09	1.05798e-06		GGTGAATTTAGGGACAGGTCTTCTAAACTTG	6.69096	6.4882	1.3519e-06	0.000224997		GACCGTAGCG	9.95651	6.8319	2.98065e-06	0.000627188		TCGGTTCCGGGGGAA	-5.39347	7.68285	1.11923e-07	2.30642e-05		GTGCGGTGATTAAAAGAATTTCTGAGCTT	6.67321	2.66476	1.61863e-09	3.69242e-07		GAAAGAACGAATGACCTTACAAGA	7.5078	4.47173	2.99159e-06	0.00056043		GCGTTTATGGTGTAATGGTCAGCATGGCCGCCTTCCAAGCGGCCGATTCGG	-5.80356
AGTCTTTCGGTTCCGGGG	-7.48851	5.53161	9.80337e-11	2.17325e-08		GTTTCTGTAGACATATCGACATCCATT	-9.27988	5.02955	2.51297e-07	4.84478e-05		GAAGTTCTCAAAGTCATGTAGTCTGCT	-9.97777	5.26819	3.83636e-09	1.062e-06		GGGGCTGCACGCGCG	-8.88327	6.01876	1.39864e-06	0.000231693		AGAGGTGAAATTCTTGGACCGTAGCG	9.09181	6.03008	2.97045e-06	0.000627188		GAATGCACCGGATCCCGTCC	-5.33606	7.8431	1.12955e-07	2.3083e-05		AGCGCTGTTTAATGGGTGCTTCCA	7.78072	2.15143	1.62309e-09	3.69242e-07		GATGGTTGGAAACTCTTTATTATAAAA	7.50277	4.46815	3.01014e-06	0.00056043		GAGTCATTCTCTGAACTAACCTTGTT	-9.404
CAGGGCGGTGGC	-9.50178	4.3603	1.00114e-10	2.20856e-08		GTTTTGGTTTCTTGAATTGTGGAAT	-9.17083	4.9257	2.53936e-07	4.87299e-05		TGAGATCAAATTAGACTTATCGA	-7.81762	5.85584	3.84847e-09	1.062e-06		TCGGTTCCGGG	-8.81585	5.95856	1.41256e-06	0.000232915		TTAAGTAGTAGTGCCGCAGGTTG	-4.6973	8.98852	2.92801e-06	0.000627188		TTACGTCCCTGCCCTTTGTA	-7.1944	6.99028	1.13108e-07	2.3083e-05		CCGCCCGTCGCT	5.69228	3.32469	1.63884e-09	3.71099e-07		TTTGTAATTGGAAGAAAAGAAA	7.50277	4.46815	3.01224e-06	0.00056043		TAGTTGGATAACTGAGGTAATTCTTGAGCTAATACACGCTTT	-6.20138
CGCCCGTCGCTGCCCGGAAC	-8.17693	4.90892	1.00554e-10	2.20856e-08		AGAACTGGCACGGAC	7.09469	2.36577	2.57493e-07	4.89592e-05		GTCGAATTAGATTATTTCAGTAGGATTATT	-10.0439	5.33348	3.9304e-09	1.07961e-06		CGGGGCTGCACGCGCGCT	-6.2426	7.94925	1.42866e-06	0.000233479		TTTGCGACCAAACCTAGATCA	-6.82931	5.47053	2.92294e-06	0.000627188		GCACACATCAAATTTTTCGTGGACT	9.01911	5.19784	1.17503e-07	2.38693e-05		GGGAGT	6.16477	2.18304	1.65482e-09	3.7299e-07		TGGCGGTGTGGTTAGCTGGTTG	-5.55332	5.17489	3.07331e-06	0.000569158		TAAGTC	-5.31519
TACGTCCCTGCCCTTTGTACACACCGCCCGTCGCT	-9.56936	4.42369	1.01036e-10	2.20898e-08		TACCCGTAATCCACTGCTGCA	7.43677	2.65002	2.56588e-07	4.89592e-05		GCACGCGCGCT	9.23036	4.04148	3.9967e-09	1.09279e-06		CCGGAGAGGGAGCCTGAG	-8.84386	5.98291	1.42909e-06	0.000233479		CAGTAATTGGTTTAATAAAAATATAGCATTTGG	-7.4444	6.03239	2.95918e-06	0.000627188		TGAGATCAAACTAGACTCATT	5.95592	6.72362	1.23111e-07	2.48328e-05		AAAGATCAGAGTCGTGTTTAT	8.41253	2.75733	1.6738e-09	3.75537e-07		GGTGAATTTAGGGACAGGTCTTAA	-8.07406	4.78361	3.18966e-06	0.000587994		ATAGGAAATGAATAAGGAGAG	-5.01087
ACTGGCGACGTGGG	-9.53081	4.38732	1.01721e-10	2.21381e-08		GGCAGTGTGGTTAGCTGGTTG	6.12621	4.08234	2.71596e-07	5.14048e-05		TGGCGACGTGGG	6.60107	4.42961	4.15469e-09	1.1308e-06		TCCCTGAGACTCTCCTTGTGA	7.61528	6.69965	1.47977e-06	0.000239888		GGTGAATTTAGGGACAGGA	-8.67384	5.44605	2.98155e-06	0.000627188		AGAACTGGCACGGACAAGAG	-5.85323	6.61776	1.23373e-07	2.48328e-05		TTTGGCACTGTATCGGCTCCA	6.02229	2.02895	1.72654e-09	3.81048e-07		ATTTTGTAATTTTTGGAGGCTCTCCTTCGGGGGAGCGAT	-4.08875	5.87992	3.25636e-06	0.000597549		TGAAAGACGTTCTATATCTCT	-5.31563
TCACCGGGTGAACAAATTCTC	-9.509	4.36683	1.02664e-10	2.22418e-08		TAAGAATTAAATTAATTTATTTAGGTTGATTTCTTATCCA	-9.21426	4.96741	2.73502e-07	5.15302e-05		ATAGCGAAAGGG	9.11587	3.93669	4.20724e-09	1.13989e-06		ACTCCGGAGAGA	-5.54694	8.39545	1.48523e-06	0.000239888		GA	-5.55543	5.85239	2.99652e-06	0.000627472		TACTGGCCTTCAAACTTCTTAAC	7.34199	5.59937	1.23946e-07	2.48349e-05		TAGAGTCGTGTTGCT	6.02229	2.02895	1.72682e-09	3.81048e-07		TGGCAGTGTGGTCAGCTGGTTG	-5.03472	4.70694	3.33994e-06	0.000610101		GACCGTTTTTTTGAGATCTTTGTCCTT	-9.59616
CTGGGGCGGT	-8.49305	5.21783	1.03242e-10	2.22658e-08		GATTTGGACTTCATTATTGCGAAGA	-9.16333	4.91914	2.75196e-07	5.16147e-05		TTTGCGACTGTATCCAAACTACG	-6.46917	12.949	4.34482e-09	1.16657e-06		TTTCGGTTCCGGG	-6.94155	6.84421	1.48853e-06	0.000239888		GGTGAATTTAGGGACAGGTCTTCTAAACTTGTTTTGAGCTAGTAACTCATTCACTTCC	-5.57419	6.7405	3.02987e-06	0.000631584		TTGCACGATTTACATACTCACA	5.38794	9.34761	1.26413e-07	2.52145e-05		TGGCAGTGTGGTTCGCTGGTTG	8.02522	2.38173	1.72952e-09	3.81048e-07		GGGCTTGATTGTCGTTTTGGTACACA	7.4995	4.46276	3.48808e-06	0.000620246		GTTGGAATTTTGAGAGATGTTTAAG	-9.40509
GGTTCCGGCCG	-9.8834	4.72666	1.04416e-10	2.24175e-08		GACGATATTGTAGAAATACCAACCTAC	-6.69545	5.38614	2.77147e-07	5.17466e-05		AAGGAGTGTATTG	9.10043	3.92262	4.33687e-09	1.16657e-06		CCCGCTGAAC	-8.79606	5.94049	1.53772e-06	0.000246701		GTGCGGTGATTAAGAGAATTTCTGAGCTTA	-5.61993	7.36796	3.1224e-06	0.00064794		TGAGATCATGCCAGTGTCATTT	4.9688	9.80292	1.28526e-07	2.53123e-05		TACCCGTAATCCACTGCTGCA	8.02522	2.38173	1.7283e-09	3.81048e-07		TCAGAGTCGTGTTTATGGGTA	7.4995	4.46276	3.48574e-06	0.000620246		TTTGCGACTGTATTCAAACTACG	-5.79606
CACACCGCCCGTCGCTGCCC	-9.90776	4.74644	1.09013e-10	2.29143e-08		AAGAACTGGCACGGACA	5.15488	4.55914	2.89993e-07	5.38533e-05		GACAAAATTTGTCTGTGACGTGAACT	-10.0543	5.34371	4.46269e-09	1.18775e-06		AATGCACCGGATCCCGTCC	-8.82444	5.96512	1.58626e-06	0.000253346		TAT	-6.83637	5.42761	3.19727e-06	0.000660501		GATTACGTCCCTGCCCTTTGTAC	-6.88395	6.69244	1.28456e-07	2.53123e-05		GAGGACGTGAAACC	5.3869	4.12252	1.76916e-09	3.863e-07		GTTATTATCATCCAACTGTACTTTTGT	7.4995	4.46276	3.48341e-06	0.000620246		TGAGATCAAATTAAACTTATC	-6.77616
GGTTTCACGTC	-9.57041	4.42662	1.09044e-10	2.29143e-08		GGTGCATTTAGGGACAGG	7.24789	2.49078	2.92247e-07	5.38533e-05		CAAGCGGCCGATTCGGGTTCGATTCCCGATA	-8.37301	6.40397	4.46357e-09	1.18775e-06		CCCGGCATGG	-6.03079	7.36541	1.65722e-06	0.000259481		GAAATTCTTGGACCGTAGCG	5.69765	6.87388	3.23248e-06	0.000663136		AGAACTGGCACGGACAAGAGGAATCC	-8.87876	5.16714	1.28626e-07	2.53123e-05		ATCGTGTCGGTG	8.26596	2.60635	1.76614e-09	3.863e-07		ATCATTTTATGATTGCGTTATA	7.47912	4.44831	3.4535e-06	0.000620246		TAAAGATGAAGTTTCGGATAT	-6.78754
GAAACCGCGGAAA	-9.50303	4.36107	1.09134e-10	2.29143e-08		TGGCAGTGTAGTTAGCTGGATG	7.24789	2.49078	2.92328e-07	5.38533e-05		GATTTGGACTTCATTATTGCGAAGA	-9.95051	5.24136	4.4925e-09	1.19013e-06		CGTAGCGAGACGTCCT	-6.15914	7.49707	1.6611e-06	0.000259481		TAAGGCACAATATCGGCATCTCT	-6.79102	5.42976	3.23881e-06	0.000663136		TTTGGGATCGAATTAACCAA	9.00352	5.1827	1.29992e-07	2.54675e-05		ATCGTGTCGGT	6.42308	2.38137	1.85107e-09	3.93642e-07		CACTTCGTCCTGAAAAGACAGG	7.46024	4.43182	3.46068e-06	0.000620246		CGAATCCTGCCAGGATCGTTATCTTT	-9.4255
AGTCTTTCGGTTCCGGGGGAAGTA	-9.48246	4.3421	1.0789e-10	2.29143e-08		GATATCTATAGAACTTGCATTAGGA	-9.23444	4.98676	2.9494e-07	5.38558e-05		GTTTTGGTTTCTTGAATTGTGGAAT	-9.96332	5.2535	4.518e-09	1.19159e-06		GGCGGGAGTA	-6.95672	6.85806	1.6496e-06	0.000259481		GCTGTCA	-5.9409	5.35421	3.31333e-06	0.000673517		CCAACCATAGCTCAG	5.51704	6.73661	1.39664e-07	2.72414e-05		TTTATTTCAATAATATTTGTT	7.78755	2.15636	1.8123e-09	3.93642e-07		TTTATAAAGATGAAGTTTCGGA	7.44988	4.42449	3.43488e-06	0.000620246		TATCTGATT	-5.08038
CCGCCCGTCGCTGCCCGGAACTGAGC	-8.71048	5.42084	1.08662e-10	2.29143e-08		TGGCAGTGTGATTAGCTGGTTG	5.89138	12.6684	2.9487e-07	5.38558e-05		TCCGATGTAGTCTAGTGGTTATGATTTGC	-7.24452	7.10509	4.59509e-09	1.20659e-06		TTGGATGGGAGACCTCCTGGGAACCGTTAGTGGC	-8.81943	5.96039	1.64661e-06	0.000259481		GGTGAATTTAGGGACAGGTCTTCTAAACTTGTTTTGAGCTAGTAA	-8.65679	5.43105	3.31875e-06	0.000673517		TAATTTTTATAACACAATCATA	8.98845	5.16797	1.44325e-07	2.80264e-05		CTAAAAGCAATTTCAGAACAGTC	7.97488	2.33652	1.8321e-09	3.93642e-07		GTCTAATTGTGATTGTTAATTGTTTCTT	7.47401	4.44468	3.53096e-06	0.000625104		GAGCTATGATGTAACTATAATGAGCCTGATCTATTTGATGTGAATTCCGCTTCTGAGCTCT	-5.1418
GGGTTCGATTCCCGATAAACGCACCA	-8.30188	5.02345	1.12681e-10	2.35553e-08		TACCCGTAGTCCAGTGCTGT	5.53738	3.14859	2.96582e-07	5.39181e-05		GAAATCCAATCGATATCGTGCTTAG	-10.2006	5.48808	4.66175e-09	1.20812e-06		CCGCCCGTCGCTGCCCGGAACTGA	-9.14109	6.25562	1.64275e-06	0.000259481		TTTTGCGTGTGGGAGAGATGCGTTCGCGCACTCTCCCGA	-5.95114	6.46369	3.3466e-06	0.000676189		TTTGCGACAGTTGTTGGCTT	7.50516	5.76103	1.48336e-07	2.86789e-05		ATCATTTTATGATTGCGTTA	8.01259	2.36405	1.84055e-09	3.93642e-07		GACTTCAATTGAAATTTTTGATCTTCC	7.4654	4.43548	3.61571e-06	0.0006373		GAATTTGGAAGTGTAACTTTT	-7.63956
AAAGTCTTTCGGTTCCGGGGGAAGTATGGTTGCA	-9.46415	4.32445	1.22099e-10	2.54126e-08		GTTAGTTGGGTTACAATATAAATACA	-9.14973	4.90642	3.06721e-07	5.55179e-05		TGTTGGTAAAGG	8.93309	3.77077	4.64075e-09	1.20812e-06		CTGGGGCGGT	-7.09584	7.00481	1.6685e-06	0.000259498		GCCCGGAACTGAGC	5.1118	7.53999	3.46927e-06	0.00069488		TTGCGTACATATTTCTGAACCT	8.88971	5.07226	1.50528e-07	2.89756e-05		TGTTTTGGATATACAGGATATGG	8.01901	2.3772	1.85075e-09	3.93642e-07		TCCCATGTAGTCTAGTGGTTATGATTTGCGGCTC	3.38282	8.90183	3.68582e-06	0.000646822		GATTTGTTTGATTGATTGTTCTTTGAT	-9.50404
CTGGCACGGACA	-6.65313	7.68125	1.24475e-10	2.57945e-08		GCCAATTGATCGTCATCCGTGTAGA	-9.13455	4.89149	3.12217e-07	5.62669e-05		GCTATGGCAAGTC	9.21652	4.02878	4.64444e-09	1.20812e-06		GATGTCCGGGGCTGCACGCG	-7.11155	7.01752	1.67774e-06	0.000259802		TAAAATCGT	-5.42737	6.6896	3.46223e-06	0.00069488		GAAAGTCTTTCGGTTCCGGGGGAAGTATGGTTGCA	-7.01628	5.97007	1.52614e-07	2.92494e-05		ATTGGAAGAAAAGAAAGATCA	8.3136	2.64915	1.81937e-09	3.93642e-07		GGTGAATTTAGGGACAGGTCTTCTAAACT	-7.21647	6.02007	3.7683e-06	0.00065842		TTTGCGACCATATCCAAAGCCCGT	-5.26847
TCGGAAACGAAAGTCTTTCGGTTCCGGGGG	-9.44904	4.31042	1.25192e-10	2.58308e-08		GAAAGATTTGTTAAGAGTGATAGACT	-9.10365	4.86332	3.19131e-07	5.7264e-05		GACTATTATTCATTCATTGTATCGACT	-10.0484	5.33809	4.73387e-09	1.21832e-06		ATTCTTGGACCGTAGCGAGACG	-8.91531	6.04758	1.72979e-06	0.000266701		CCTTCCAAGCGGCC	9.55484	6.45362	3.54221e-06	0.000703373		CGAGCCCCCTGGAGGGCTTAGTCTTT	8.83811	5.02229	1.55013e-07	2.95807e-05		ACAGGTCTGTGAT	5.40651	2.17855	1.86849e-09	3.95627e-07		AAAAACATTTTCAGTAGTCAA	7.43059	4.4077	3.9731e-06	0.000691198		TTTACGACCTTATCCGTGTCACT	-6.67589
TAGTACTTGGATGGGAGACCTCCTGGGAACCGTTAGT	-9.45949	4.31986	1.26791e-10	2.60478e-08		GAGAACTTTTCAAGAACATGAGCCT	-9.13027	4.8884	3.21706e-07	5.74773e-05		TAAGAATTAAATTAATTTATTTAGGTTGATTTCTTATCCA	-10.0005	5.29081	4.74196e-09	1.21832e-06		TTTGCGACCTCTATCAGACCTCT	6.04875	6.76151	1.78555e-06	0.00027177		GTGTAGGCTGG	9.0526	5.9948	3.53714e-06	0.000703373		GCAACCTGAATGGTCGGATTTGACA	8.88968	5.07223	1.59837e-07	3.00408e-05		GACCGTC	5.99827	2.03563	1.89375e-09	3.95863e-07		TAAAGATGAAGTTTCGGATATA	7.42005	4.40028	4.07408e-06	0.000705711		TTTGCGACTGTATTCAAAACCCG	-5.3163
CACACCGCCCGTCGCT	-7.96793	5.48518	1.27528e-10	2.6087e-08		GGTGAATTTAGGGACAGGTCTTCTAAACTTGTTTTGAGCTAGTAAC	4.93589	3.01005	3.23183e-07	5.74932e-05		GTTTCTGTAGACATATCGACATCCATT	-10.071	5.36025	4.92293e-09	1.25938e-06		AAAGTCTTTCGGTTCCGGG	-5.96695	7.70189	1.77227e-06	0.00027177		GGTGAATTTAGGGACAGGTCTTCTAAACTTGTTTAAA	-8.65334	5.42804	3.60687e-06	0.00071009		TAGGAAATGAATAAGGAGAGA	8.83807	5.02226	1.59124e-07	3.00408e-05		CCCCGGG	5.99827	2.03563	1.89322e-09	3.95863e-07		GCTGGATATTGAAACTTTTCTTCTGAA	7.41475	4.39656	4.29237e-06	0.000740333		TCGAATCGTCTAGAAGTTAATT	-5.4703
GAACATGTCAACTAAATATGAACT	11.1271	6.51232	1.29191e-10	2.6314e-08		TCCCTGAGACTCTCCTTGTG	8.23513	3.3671	3.26448e-07	5.78259e-05		TTCGGTTCCGGGGG	6.91276	4.76983	4.96799e-09	1.26548e-06		TCTTTCGGTTCCGGGGGAA	-8.79967	5.94231	1.78501e-06	0.00027177		CGAATCCTGCTGACTGCGAATTGTTT	-8.85121	5.62647	3.59442e-06	0.00071009		TAAATATGAATGTGAATGTTATA	5.17016	7.64288	1.60291e-07	3.00408e-05		GTGAGTTAGTC	6.34965	2.35975	1.89389e-09	3.95863e-07		TGCCCACTGTTAATCCCCGGGTATCCATCCTTCAAATGTGGTCTCGGTTTCGTAAGATGGGTA	-7.51055	4.27856	4.4713e-06	0.000767899		GAAAAACAACAAACTAATTAAAGG	-9.3214
GGTGAAATTCTTGGACCGTAGCGA	-7.66011	5.702	1.32335e-10	2.68398e-08		GCAACTGTAGAGTGATGGGTTGTGG	-9.09074	4.85058	3.30074e-07	5.82194e-05		GAATCCTGTGACCCGAGTGCAAATCTCGGTGGTGCCTCCA	-8.52495	7.98342	4.99549e-09	1.26707e-06		TCCGGGGGAAG	-6.87968	6.78604	1.80118e-06	0.000272982		CATTT	-6.8401	5.43063	3.63031e-06	0.000711665		GAAATTCTTGGACCGTAGCGAGACGTCCTAC	-6.33345	6.69573	1.60832e-07	3.00408e-05		GTAGTTTGT	6.02936	2.03405	1.934e-09	4.02528e-07		TGAAAGACATGGGTAGTGA	4.49631	5.8175	4.57854e-06	0.00078297		GTGAAATTCTTGGACCGTAGCGAGACGTCCTACT	9.72185
GGGGATATAGCTCAGTGGTAGAGCA	8.54511	9.27069	1.32954e-10	2.68512e-08		GGCGGAATGGCCGAGTGGTCTAAGG	-6.78562	9.29883	3.32921e-07	5.84728e-05		TGTCACTGTT	-7.50297	6.42585	5.05085e-09	1.27568e-06		GAAAGTCTTTCGGTTCCGGGGGAAG	-5.64745	7.69399	1.8723e-06	0.000282559		AAGGGAACGGGCTT	6.37985	6.64637	3.75004e-06	0.00073202		GAGAGGCAGGAAGAG	-8.81757	5.1121	1.59902e-07	3.00408e-05		CGAATCCCTCTCTCGTCAAAAATCTTTT	6.13107	2.15867	1.95398e-09	4.04963e-07		GGATCTATTTTCTCGATCAGAAGGCT	7.40568	4.38692	4.65661e-06	0.000790754		GATCCCGTCCGATCTCCG	7.01124
TTGGATGGGAGACCTCCTGGGAAC	-9.46543	4.32523	1.33608e-10	2.68693e-08		GAATGATATTCTCGAATTGTATACT	-9.17971	4.93517	3.36056e-07	5.85488e-05		GTTAGTTGGGTTACAATATAAATACA	-9.93624	5.2274	5.08328e-09	1.27846e-06		ATAGGAAATGAATAAGGAGAG	6.11623	7.8186	1.8974e-06	0.000284786		TTTAGTTGGATAACTGAGGTAATTCTTGAGCTAATACACGCTTT	-5.44542	5.74563	3.94936e-06	0.00075808		TTTGCGTACATATCTCTGAACCTC	6.80321	5.01433	1.62986e-07	3.03147e-05		GGGGAGT	5.97093	1.98374	1.98034e-09	4.08695e-07		GTAATATTCGGAAAGCGTTTTTTAAA	7.38031	4.36581	4.66342e-06	0.000790754		TTTAGTTGGATAACTGAGGTAATTCTTGAGCTAATACACGCTTTT	-7.07939
TGTGTCTGATTTCTGCCCAGTGC	-7.48258	5.01827	1.35344e-10	2.7104e-08		ACAGCGGGGAA	5.10944	2.74048	3.36179e-07	5.85488e-05		GGAATCGGCTATGCAAAATTTCTGGCT	-9.88038	5.17239	5.14789e-09	1.28387e-06		GTCCGGGGCTGCACGC	-8.72715	5.87676	1.90305e-06	0.000284786		TGAGATCATGTTAGACTCATAT	-5.65003	9.54745	3.94349e-06	0.00075808		ACATTATGTCGATACAACTTGAACTGAGCT	6.20803	6.62414	1.63937e-07	3.03634e-05		TGGACTAAAAGCAATTTCAGA	7.75394	2.1317	1.99903e-09	4.10818e-07		GGTGAATTTAGGGACAGGTCTTCTAAACTTGTTTAA	-5.39133	4.2598	4.70188e-06	0.000793926		AGGTGAAATTCTTGGACCGTAGCG	9.71856
CCCGTCCGATCTCC	-9.4563	4.3166	1.36756e-10	2.72722e-08		GTCGAATTAGATTATTTCAGTAGGATTATTTCGATACC	-9.52417	5.26133	3.3866e-07	5.87342e-05		AAGTGTTGTT	8.94994	3.786	5.13789e-09	1.28387e-06		TCACCGGGTGAACGAATTCTCA	-9.56946	9.41902	1.94123e-06	0.000289284		TTCGATGATGTTATCTGCTTAGCAATTCCGAATATATTTGAGGAAAATGCCGCTTACTGAGTT	-7.2816	8.85897	3.93754e-06	0.00075808		GTAATTGTGGATTCATTTGAGGAA	8.97184	5.15192	1.66588e-07	3.07254e-05		TATTTGAAACTTCATCTTTGT	8.21699	2.56256	2.01363e-09	4.12086e-07		GATAAGTTGCATTCGTTGACTATATGA	7.38961	4.37565	4.85526e-06	0.000816394		GTTTCTAGCAGATGATCGTTTGACGCA	-7.46371
CGGTTCCGGG	-8.27017	4.99518	1.41088e-10	2.80189e-08		GTGAAGTTCTGTTCTGCTGTGGTCCT	-9.07538	4.83616	3.49443e-07	6.03517e-05		GCCCGTCGCTGCCC	6.01362	4.77975	5.24061e-09	1.30155e-06		TGGCGGGGAGTT	-5.84317	7.57465	1.97667e-06	0.000291459		GGTGAATTTAGGGGCAGGTCTTCTAAACTTGTTTTGAGCTAGTAACTCA	-8.62165	5.39643	3.9401e-06	0.00075808		TGAAAGACATGGGCAGTGAG	8.80267	4.98802	1.74366e-07	3.16306e-05		TACCCGTAGTCCATTGCTGT	6.01564	2.02385	2.03041e-09	4.12981e-07		TATATCCATAAACACCACTCTGA	7.38574	4.3696	4.93494e-06	0.00082357		TCATT	-7.49347
ACCGCCCTAGTT	-9.72348	4.57332	1.42267e-10	2.80241e-08		GTAATCTTTAGATTGAGTTGGAACA	-9.14239	4.89976	3.57524e-07	6.14912e-05		GAGAACTTTTCAAGAACATGAGCCT	-9.91823	5.20987	5.29872e-09	1.30379e-06		CCGGAGAGGGAGCCTGAGAA	-8.71495	5.86571	1.97405e-06	0.000291459		GTGAAATTCTTGGACC	5.73866	6.91179	4.00442e-06	0.000761759		TTTGCGACTGTATTCAAAACCCG	5.06342	7.72663	1.742e-07	3.16306e-05		TTTGGCTGAGGAT	6.24886	2.23229	2.03489e-09	4.12981e-07		TTTTGGAATGAAGCTAGAAATAGCTTCTAAT	-3.50113	7.29575	4.93892e-06	0.00082357		GATTTATTTATTTTGTTAGTTGGGTT	-9.40582
CCTGGGAACCGTTAGT	-7.31172	5.36507	1.4229e-10	2.80241e-08		GTTCCTTTCCATGTTCGTGCAAG	-9.10055	4.86019	3.64646e-07	6.24569e-05		TGGTTGGATCGATCAGCAAATA	-6.27867	7.6877	5.33712e-09	1.30379e-06		GATGCCCTTAGATGTCCGGGGCTGCACGCG	-8.72517	5.87472	1.98037e-06	0.000291459		CGTAAGTC	-4.54434	8.43723	4.01813e-06	0.000761759		TTTCGGTTCCGGGGGAAGTA	-6.08647	6.45904	1.73526e-07	3.16306e-05		GGTTTCACGTCA	6.25892	2.27654	2.04348e-09	4.13011e-07		GATATTTGAGATTGTTGATTGATTGTT	7.45321	4.43013	4.98406e-06	0.000827664		GGTCCGATTCCCG	9.74694
GAATGCACCGGATCCCGTC	-9.44711	4.30793	1.45811e-10	2.85993e-08		TGGTAGTGTGGTTAGCTGGTTG	5.73575	2.63333	3.66851e-07	6.2576e-05		GTGCAAATCGGT	7.38947	4.35549	5.32144e-09	1.30379e-06		GGTGAATTTAGGGACAGGTCTT	6.21371	6.50967	2.08568e-06	0.000305694		ATTTTGTAATTTTTGGAGGCTCTCCTTCGGGGGAGCGAT	-4.96139	6.74334	3.99366e-06	0.000761759		TCTTTCGGTTCCGGGGGAA	-8.86101	5.14956	1.73509e-07	3.16306e-05		TTTGCGACCTATATCCAGGC	5.94751	1.9906	2.08549e-09	4.18047e-07		GGTGAATTTAGGGACAGGTCTTCTAAACTTGA	-7.3977	4.18465	5.05685e-06	0.000836295		GGAACGGGCTTGG	9.74159
CACCGCCCGTCGCTGCCC	-10.5279	5.35084	1.48227e-10	2.89541e-08		GTAGTTGAAAATCGCCAAACGTGACG	-9.07237	4.83409	3.73117e-07	6.31338e-05		TTGAACCGGGCA	9.25095	4.06039	5.30738e-09	1.30379e-06		ATTACGTCCCTGCCCTTTGTA	-9.34333	6.44378	2.11859e-06	0.000309245		ATAAAATCGTGT	-5.37635	6.39687	4.05109e-06	0.00076486		AAGAACTGGCACGGACAAG	-8.81639	5.1098	1.7542e-07	3.16914e-05		TTTGCGACCATATTCAAAGCCCG	5.94752	1.9906	2.08387e-09	4.18047e-07		AGAAAGATCAGAGTCGTGTTTA	7.37489	4.36202	5.36894e-06	0.000882824		GTTAAAATAAAAACTGATCGAGTAATT	-7.44033
CGCCCGTCGCTGC	-8.12201	4.79493	1.54586e-10	3.00729e-08		CCTTCCAAGCGGCCGATTCGGGTTCGATTCCCGATA	-7.65192	6.304	3.74175e-07	6.31338e-05		GTTCCTATGTAGAACACATATTCTCGT	-9.95082	5.24171	5.4046e-09	1.31325e-06		TGGCATGGGAGAGGGCTGG	-6.82745	8.50675	2.18498e-06	0.000317634		GGTGAATTTAGGGACAGGTCTTAA	-6.98428	5.57684	4.09349e-06	0.000769709		TTTCGGTTCCGGGGGAA	-5.33386	7.93862	1.7686e-07	3.18211e-05		TTTGCGACCTCTACCAGACCTC	5.78004	3.00372	2.09418e-09	4.18075e-07		GGTGAATTTAGGGACAGGTCTTCTAAACTTGTTTTGAGCTAGTAAC	-7.41079	4.19337	5.38214e-06	0.000882824		GACGTATTTTTAGACTGTTGTGATTGTT	-9.27737
ACCGCGGAAAGC	-7.47507	4.96206	1.57046e-10	3.04273e-08		GTAGGTGTAGTAGAATTACTTTTT	-5.90542	5.51168	3.74691e-07	6.31338e-05		GAAAGATTTGTTAAGAGTGATAGACT	-9.89416	5.1861	5.41991e-09	1.31325e-06		GGTGAATTTAGGGACAGGTCTTCTAAACTTGTTTTGAGCTAGTAACTCATTCA	5.4979	7.01442	2.26954e-06	0.000328585		GTAGCGAGACG	6.77733	7.02021	4.18385e-06	0.000783502		GTACTTCAGAGTGTTTCTCGTCCGA	8.80252	4.9879	1.82223e-07	3.25071e-05		TTAGGGTTCGACT	8.21126	2.55834	2.10552e-09	4.1863e-07		GTGTTCCTTTCCATGTTCGTGCAA	7.34898	4.34052	5.431e-06	0.000887218		GTATCCAATAGCTTTCGTTGTTT	-9.38531
TTCGGTTCCGGGGGAAGT	-8.06701	7.55541	1.58279e-10	3.0482e-08		TGGCAGTGTGGTTAGCTGGTTGA	5.45493	3.03428	3.80598e-07	6.38696e-05		GATATCTATAGAACTTGCATTAGGA	-10.0236	5.31372	5.48462e-09	1.32343e-06		TCACCGGGATATCAGATGCTC	-6.11578	8.62134	2.2926e-06	0.00033058		CGTC	-5.00246	7.10932	4.21408e-06	0.000785969		GTATCCAATAGCTTTCGTTGTT	6.56507	5.55683	1.8436e-07	3.25071e-05		CGGATATAGAAGATATGGCGAA	8.37867	2.72549	2.19728e-09	4.35106e-07		GAAAACATATATCCTTCCTCGGACG	7.37874	4.36812	5.75409e-06	0.000936193		GAAATATATATATAGGT	-7.51555
ATTCTTGGACCGTAGCGAGAC	-7.42049	4.95888	1.58607e-10	3.0482e-08		GGCGAGATGGCCGAGCGGTCT	-10.632	6.32818	3.91214e-07	6.5015e-05		GCCAATTGATCGTCATCCGTGTAGA	-9.92585	5.2166	5.52852e-09	1.32343e-06		ACCGCCCGTCGCT	-5.30984	8.56873	2.32198e-06	0.000333466		GGAACGGGCTTGG	6.3971	6.66236	4.24216e-06	0.000788016		TGATATGTCTGGTATTCTTGG	6.25977	9.39743	1.82809e-07	3.25071e-05		TCAATAACTTACTGTGGAAAT	7.70819	2.08937	2.21719e-09	4.35949e-07		GTCACTTTCGAGGATTAGCTTCTCTGG	7.36001	4.3482	6.03428e-06	0.000977821		TGAGATCATGCCAATGTCATTT	-7.47134
TCGGAAACGAAAGTCTTTCGGTTCCGGGG	-9.38447	4.24914	1.62487e-10	3.11023e-08		TCCGATGGTCTAGTGGTTAGGATTTG	-10.5181	6.21702	3.92129e-07	6.5015e-05		GCACGCGCG	9.39343	4.1918	5.52419e-09	1.32343e-06		GACCTCCTGGGAACCGTTA	-8.65739	5.81324	2.33569e-06	0.000334088		AGAAGACCCTGTTG	9.02815	5.97292	4.32346e-06	0.000797235		GCCCGTCGCTGCCCGGAACTGAGC	-5.69082	6.76136	1.83674e-07	3.25071e-05		AAAAACATTTTCAGTAGTCAAA	8.23786	2.58552	2.21936e-09	4.35949e-07		TCAGAGTGGCATTTATGGATA	7.40401	4.38911	6.07899e-06	0.000981109		TTCTGGGATTGTTTATCTTGGT	-6.69187
ACTGAATGCACCGGATCCCGTCC	-7.46084	4.99743	1.63931e-10	3.12531e-08		TGGCAGTGTAGTTAGCTGGTTGAT	5.27296	4.17182	3.90348e-07	6.5015e-05		GTTTGAACCGGGCA	5.89829	5.44197	5.64625e-09	1.33032e-06		TGTTGGGCTCTGCC	-6.69434	7.99313	2.38917e-06	0.000339015		TACCCGTAGTCCCATGCTGTCA	-5.76288	5.99137	4.3264e-06	0.000797235		CCTGCCAGGATCGCC	-8.04318	6.95603	1.84239e-07	3.25071e-05		CGGCCTGGTTAGTTGCAAAGA	6.14866	2.13541	2.26321e-09	4.42784e-07		GACAATAGACAATTGTTAGGCTTAGA	7.36554	4.35203	6.59219e-06	0.00105968		GTATCCAATAGCTTTCGTTGTTTTA	-7.46379
ATGTGTAGGCTGGC	-9.38963	4.25458	1.66904e-10	3.16932e-08		TGGCAGTATAGTTAGCTGGTTG	7.44125	2.65287	3.99837e-07	6.60288e-05		CATAAAAAGTGTTGTT	9.17372	3.98958	5.64658e-09	1.33032e-06		TTGGATGGGAGACCTCCTGGG	-8.65027	5.80699	2.38856e-06	0.000339015		CTACCCGTAGTCCAATGCTGTCA	-5.23388	6.43309	4.35372e-06	0.000798867		TCTTTCGGTTCCGGGGG	-8.97874	5.25549	1.90053e-07	3.33773e-05		CGCCCGTCGCT	6.57167	2.56973	2.30228e-09	4.43906e-07		ATTGCACATAGACTATTCTGAA	7.32819	4.32256	6.8783e-06	0.00109388		TTTGGGACCTGTGCTTAAGTTG	-5.32266
AGGCTGGCGTAGTA	-7.79566	5.3179	1.67768e-10	3.17308e-08		GTTATGATCAAAACCTCTGTATACA	-9.0371	4.80091	4.04924e-07	6.66037e-05		CTGGGAACCG	9.18867	4.00325	5.64319e-09	1.33032e-06		CCGGGGGAA	-7.02485	6.9242	2.4036e-06	0.000339709		TTAAGACACTTTACTTATTTGGATTTGTTT	-8.61812	5.39337	4.36994e-06	0.000798867		TTTGTATTGCTGAATTTTTGCTC	7.26934	5.52906	1.97348e-07	3.45211e-05		TTGGAAGAAAAGAAAGATCA	7.61848	2.00622	2.31433e-09	4.43906e-07		TTTTGCGTGTGGGAGAGATGCGTTCGCGCACTCTCCCGA	-4.09231	5.63335	6.86472e-06	0.00109388		TCACCGAATCCACGATGTCTTAAT	-5.7221
GGGTTCGACTCCGGAG	-9.42682	4.28846	1.71646e-10	3.23359e-08		GATAATCTTTGGCTTCTTGACAACA	-9.07132	4.83303	4.0717e-07	6.67083e-05		AATCGGTCGTC	9.25117	4.06059	5.6256e-09	1.33032e-06		TGGCAGTGTAGTTAGCTGGTTGAT	8.842	5.90022	2.42704e-06	0.00034032		GGATCCCGTCCGATCTCCG	9.16022	6.09136	4.44594e-06	0.000809547		TAGGGTTCGACTCCGGAGAGGGA	-7.05969	6.00968	1.99193e-07	3.4706e-05		TTGCACGATTTACCTACTCACA	7.61848	2.00622	2.31026e-09	4.43906e-07		TGATATGTACAGTTATTCTGT	-4.21515	7.57246	6.88659e-06	0.00109388		AAGATGCGTGGGTTCGAACCCCACTTCCGTCACCA	-6.94424
ACTGGCGACGTGG	-9.43916	4.29998	1.85933e-10	3.47528e-08		GTAATTAACCGTCATATGTGTCAGA	-9.1901	4.94515	4.11391e-07	6.69056e-05		TGGTTGGATCGTTCAGCAAATA	-7.6754	8.66598	5.68679e-09	1.33452e-06		TACGTCCCTGCCC	-6.38443	7.16766	2.41971e-06	0.00034032		TCGAATCCCACTCTCGTCAC	-5.8994	5.31465	4.47685e-06	0.000811967		TTTGCGACCAAACCAGATCAA	5.40155	6.71742	2.02951e-07	3.52216e-05		CCGCCCGTCGCTGCC	7.61848	2.00622	2.30612e-09	4.43906e-07		TATATCCCAATGGTGATCAAGA	7.37111	4.35585	7.40844e-06	0.00117214		GAAAATCTCCGTTGTTCCTATGTAGAA	-9.3855
CGTTGGGCTTTGCCCGCGCG	-7.77869	5.31304	1.85865e-10	3.47528e-08		GTAATTCTAATACGGTCAATGTTGT	-9.02584	4.79039	4.16116e-07	6.69056e-05		GCAACTGTAGAGTGATGGGTTGTGG	-9.88322	5.17484	5.73272e-09	1.33761e-06		TGGCAGTGTAGTTAGCTGGTTGATGATGCAGAAAATCAACAGCTTACCAAATTGCCATC	8.64759	5.71472	2.5186e-06	0.000341909		TACCCGTAGTCCATTGCTGTCA	-4.54113	9.90962	4.52325e-06	0.000817164		ATAGGAAATGAATAAGGAG	8.83789	5.02211	2.13717e-07	3.68518e-05		ATCAGAGTTGTGTTTATGGG	8.2055	2.55411	2.31326e-09	4.43906e-07		GTATCCAATAGCTTTCGTTGTTTTTAAA	7.28997	4.29252	7.532e-06	0.00118701		GTCACTGT	-5.18988
GCCCTTAGATGTCCG	-7.79256	5.31553	1.98154e-10	3.68923e-08		GTATTGTTGGTACGAATCGTAGACA	-9.01076	4.77583	4.18059e-07	6.69056e-05		GTAGTAGAGC	7.40482	5.19179	5.74487e-09	1.33761e-06		GGCTGGCGTAGT	-5.20178	8.5842	2.45026e-06	0.000341909		GCTGGCGTAGT	5.58657	6.7713	4.55003e-06	0.000818792		AAAGTCTTTCGGTTCCGGGGGAAG	-6.92608	5.88577	2.14016e-07	3.68518e-05		TATTGCACATAGACTATTCTG	7.84098	2.21299	2.403e-09	4.59114e-07		TTTGCGACTAATCCAGGCCAC	3.38933	8.59006	7.58202e-06	0.00119023		AGGTTGGAGAATGAAAA	-7.40244
ACCGCCCGTCGCTGCC	-7.85194	5.37252	2.02739e-10	3.75989e-08		GCCTTGATGCCAGAGTGGTTAATGG	-6.9674	7.06768	4.14674e-07	6.69056e-05		GTTCCTTTCCATGTTCGTGCAAG	-9.88726	5.17923	5.81282e-09	1.34294e-06		AACGGCGGGAGTA	-5.57617	7.62594	2.53877e-06	0.000341909		TGAGATCATGTTAGACTCATAC	-5.48082	7.85643	4.58388e-06	0.000821674		TGTAATTTTTTCACCTGTCTT	8.78432	4.97034	2.18672e-07	3.73615e-05		AAGGATCGTGTAAC	6.06709	2.09444	2.46602e-09	4.69321e-07		GCTCGGCTT	7.30711	4.30432	7.72213e-06	0.00120283		GAAGTTGATTTATCTTGGAATTGTATT	-9.25554
GGGTTCGACTCCGGAGA	-9.43442	4.2953	2.08019e-10	3.84288e-08		TGGCAGTGTAGTTGGCTGGTT	7.01898	2.30458	4.17268e-07	6.69056e-05		TGGACCGTAGCGAGACGTCCTACT	6.00683	5.07987	5.80948e-09	1.34294e-06		GATTACGTCCCTGCCCTTTGT	-5.82345	7.86205	2.54328e-06	0.000341909		GATGGGAGACCTCCTG	6.3508	6.61946	4.64027e-06	0.0008265		CTGGCACGGACAAGAGGAATCC	-7.01156	5.9645	2.18187e-07	3.73615e-05		AGGTCTGTGAT	6.17123	2.18791	2.5282e-09	4.77439e-07		GATATC	4.91873	5.29158	7.71302e-06	0.00120283		TTTGAAACTTCATCTTTGTAGA	-7.4249
TTAGGGTTCGACTCCGGAGAGGGA	-7.79213	5.3144	2.11977e-10	3.90088e-08		ATTGGT	7.01898	2.30458	4.16233e-07	6.69056e-05		TAATACTGCCTTAGACGGCTAA	-8.38002	7.29587	5.86392e-09	1.34433e-06		AGTCTTTCGGTTCCGGGGGAAGT	-5.87126	7.89274	2.51091e-06	0.000341909		CGG	-4.61747	9.25019	4.66335e-06	0.0008265		TTTGCGACCTCTATCAGACCTCT	5.88575	5.79687	2.20856e-07	3.75889e-05		TTGCGACCAAACTTAGATC	8.28281	2.61881	2.52234e-09	4.77439e-07		TGGCACGTATATCGTTATC	7.40762	4.38471	7.81068e-06	0.00120958		GATGTTTGAATTTGTGTTGTTTCTGTT	-7.53768
CACCGCCCGTCGCTGCCCGGAACT	-8.02101	5.99894	2.161e-10	3.96144e-08		GGTGAATTTAGGGACAGGTCTTCTAAACTTGTTTTGAGCTAG	4.86684	4.54614	4.24899e-07	6.77386e-05		AGCGCAAAGTTGGT	6.52421	4.36593	5.85795e-09	1.34433e-06		ATGTCCGGGGCTGCACGCGCGCT	-6.44709	7.23673	2.50925e-06	0.000341909		ATATATATAGGTTG	-8.64638	5.42201	4.66463e-06	0.0008265		ATATAGGTTGGAGAA	5.38115	6.57619	2.22432e-07	3.77116e-05		TTTGTTAAGGAAGATTTTTTA	8.05571	2.41244	2.63809e-09	4.96276e-07		GATAGATATAATCTTGAGTTTGTTAGTG	7.29567	4.29646	7.82571e-06	0.00120958		TTTGGGACCTGTGTTTAAGTTGA	-7.4195
AACAGCGGGGAA	-7.96542	4.70597	2.1749e-10	3.97043e-08		GAGCAATATCATTTCTGTAGGAGGA	-9.11289	4.87123	4.31086e-07	6.83375e-05		GTGCATTGACGATTTTCTTGTAGACT	-9.99991	5.29038	5.92605e-09	1.34922e-06		CCCGGTTTCG	-8.62509	5.78494	2.47798e-06	0.000341909		TGGCAGTGTGGCTAGCTGGTTG	-5.81624	5.75299	4.69876e-06	0.000829358		GTTTGATTGATTGTTCTTTGATTGATT	8.74752	4.93482	2.2464e-07	3.77952e-05		AGAAAGATCAGAGTCGTGTTT	7.61157	2.00107	2.71407e-09	5.08612e-07		GAAGTATTAATTTTAGAATTTTCGGTT	7.39303	4.38164	8.09637e-06	0.00124357		TGAGATCAAACTAGACTCATTA	-6.98291
GAAAGTCTTTCGGTTCCGGG	-7.86195	6.83403	2.18256e-10	3.97043e-08		GGCGAGATGGCCGAGCGGTCTAAGG	-6.96433	11.4702	4.33601e-07	6.83375e-05		GAATGATATTCTCGAATTGTATACT	-9.96921	5.26018	6.05517e-09	1.34922e-06		GCTAAGGATCGTGT	-8.63084	5.7903	2.53334e-06	0.000341909		TGATGCCCTTAGATGTCCGG	9.1786	6.10798	4.76989e-06	0.000838699		TTTGCACTTAGATACCTGACTACC	6.15631	5.75325	2.23798e-07	3.77952e-05		TTTGCGACCCAATTCAGGCTAT	7.7423	2.1144	2.7432e-09	5.10631e-07		GGTGAATTTAGGGACAGGT	-7.34161	4.13801	8.10749e-06	0.00124357		GTAAAACTCGTTGATGCTTTGCTCTA	-9.23276
AGAAGTTTGATTGCCATGAACA	11.1796	6.56416	2.23571e-10	4.05165e-08		GGTTTCACGTCA	5.4451	2.39698	4.32103e-07	6.83375e-05		GTAATCTTTAGATTGAGTTGGAACA	-9.92815	5.21963	6.06564e-09	1.34922e-06		GAAGGGCACCACCAGGAGTGGAGCCTGCG	-8.70007	5.85136	2.50589e-06	0.000341909		TGCGTGTGGGAGAGATGCGTTCGCGCACTCTCCCGA	-6.67736	5.27373	4.91884e-06	0.0008616		GTTTGTGTTGTACTAGAACTAATACTC	6.80377	5.01415	2.33725e-07	3.90493e-05		GTGTGTGG	7.7423	2.1144	2.74572e-09	5.10631e-07		GATATTTTCGTCTATTTGTGGAATTCCT	7.47303	4.43719	8.2141e-06	0.00124418		GTTCCTATGTAGAACACATATTCTCGT	-9.30043
ACCTCCTGGGAACC	-7.92476	4.66751	2.29691e-10	4.14679e-08		GGTGAATTTAGGGACAGGTCTTCTAAACTTGTTTTGAGCTAGTAACTCA	5.45709	8.83331	4.36597e-07	6.8549e-05		GTGAAGTTCTGTTCTGCTGTGGTCCT	-9.86672	5.15864	5.98295e-09	1.34922e-06		GGACGTGAAACCG	-8.78902	5.93167	2.51452e-06	0.000341909		ATATAGGTTGGAGAA	-6.44036	5.8865	4.96862e-06	0.000867024		TTACGTCCCTGCCCTTTGT	-5.78053	7.09427	2.33866e-07	3.90493e-05		TGATTTTTCTAATGTACTGTTA	7.84508	2.20691	2.84745e-09	5.27543e-07		TCGGATATACAGAATATGGCT	7.47303	4.43719	8.2094e-06	0.00124418		TTCAAAAACATTTTCAGTAGTC	-9.36489
CTTGGACCGTAGCGAGAC	-9.46812	4.32991	2.35109e-10	4.22859e-08		AGCCAAAAATGTTCGCAAATT	-9.1221	4.88111	4.45453e-07	6.92504e-05		TGATATGTCTGGTATTCTTGGG	-7.6052	9.58116	5.97654e-09	1.34922e-06		CCGCCCGTCGCTGCCCGGAACTG	-9.30177	6.40468	2.54396e-06	0.000341909		CAGTAATTGTTTAATAAAAATATAGCATTTGGA	-8.61457	5.3903	4.99128e-06	0.000867692		TCTATATGTTGAGAATACTTTCTGAAC	11.6787	7.82925	2.37937e-07	3.95793e-05		CCGACTGTCT	6.29749	2.31414	2.89556e-09	5.32424e-07		GTAATATTCGGAAAGCGTTTTTTAAAA	7.33945	4.33032	8.2353e-06	0.00124418		CGGGCTTATCTTTT	-9.36489
CTGCCCGGAACTGAGCA	-8.30816	5.03635	2.3627e-10	4.23349e-08		AGCGAT	4.51625	2.6663	4.46076e-07	6.92504e-05		GTGAGTTAGTCG	6.38376	5.1764	5.97994e-09	1.34922e-06		GCTGCCCGGAACTGAGCA	-9.53215	6.62824	2.59609e-06	0.000347602		TGATATGTACAGTTATTCTGTT	-5.40161	6.42175	5.11964e-06	0.000886661		GAAGTAGAATTATTTGATTGGAGAAGG	8.76596	4.95262	2.39268e-07	3.96511e-05		TAACTTACTGTGGAAATTGGT	8.1444	2.49356	2.89095e-09	5.32424e-07		GATATCGGTAGATGTGTAGTACCTGCT	7.33945	4.33032	8.22976e-06	0.00124418		AATATCTGAATTGTTTACAAGA	-5.61365
GTCTAACTCGTTGAAATTCTGCTACT	10.8364	6.22494	2.38139e-10	4.25101e-08		GTACTCCGGAGA	5.54111	2.47279	4.45286e-07	6.92504e-05		GCCCGGAACTG	6.42384	5.51521	6.06636e-09	1.34922e-06		GAGGTGAAATTCTTGGACCGTAGCGAGA	-8.61863	5.77829	2.62716e-06	0.000349138		TAACCGTAGTCCAATGCTGTCA	-5.57372	6.21308	5.17498e-06	0.000892888		TTGGATGGGAGACCTCCTGGG	-8.71239	5.01598	2.42483e-07	4.00334e-05		TGACTCTCT	8.04948	2.40797	2.99443e-09	5.48541e-07		GTAAAATTCGAGAAGCTGTTTAACA	7.27405	4.27784	8.58141e-06	0.00129057		GAAATATATATATAGGTTG	-6.61009
GATACCGCCCTAGTT	-9.31575	4.18499	2.40365e-10	4.27473e-08		CAAAT	5.33366	2.89547	4.51007e-07	6.94954e-05		AAAGTCTTTCGGTTCCGGGGGAAGT	9.02295	3.85213	6.01376e-09	1.34922e-06		TTGACGGAAGGGCACCACCA	-8.71042	5.86047	2.61749e-06	0.000349138		GGGGAAGTATG	5.44784	8.14636	5.3069e-06	0.000909188		GGCATTTTCAAAATATTTAGCATTGTC	8.82021	5.00501	2.45571e-07	4.03918e-05		TAAACACCACTCTGATCTACC	7.89402	2.25131	3.03045e-09	5.53068e-07		TCTATATGTTGAGAATACTTTCTGAAC	6.71287	7.47426	8.60661e-06	0.00129057		CGAATCCTGCCAGGATCGTCACCTTTT	-9.20962
AGCGGGGAAAGA	-9.30318	4.17196	2.42639e-10	4.29913e-08		TGGCAGTGTAGTTAGCTGATTG	5.39148	2.35309	4.50624e-07	6.94954e-05		GTAGTTGAAAATCGCCAAACGTGACG	-9.86079	5.15344	6.21297e-09	1.37669e-06		ATTCTTGGACCGTAGCG	-5.78005	7.52329	2.68874e-06	0.000355994		GGTGAATTTAGGGACAGGTCTTCTAAACTTGTTTTGAGCTAGTAACTCATTCACTTCCA	-6.26133	9.71865	5.30893e-06	0.000909188		TACGTCCCTGCCCTTTGTACACAC	-8.81307	5.10497	2.46769e-07	4.0438e-05		TCCCTGAGATTTCTTATAACCGG	5.93981	1.98566	3.08247e-09	5.58396e-07		TCCATAAACACCACTCTGAT	8.67517	5.47416	8.70761e-06	0.00129592		TGAAAGACGTTCTCTATCTCT	-5.94486
AACAGCGGGGAAAG	-9.30483	4.17344	2.49717e-10	4.40814e-08		TGGCAGTGTAGTTAGCTGGTTA	5.18613	2.83893	4.6782e-07	7.1819e-05		GTTATGATCAAAACCTCTGTATACA	-9.82571	5.11888	6.40622e-09	1.41426e-06		ATAGGTTGGAGAATGA	6.75675	5.79203	2.73177e-06	0.000359021		ACCAGGAGTGGAGCCTG	9.32683	6.24323	5.35504e-06	0.000909501		ATGGACTAAAAGCAATTTCAGA	8.88951	5.07208	2.50654e-07	4.09226e-05		TATTTATCAATAACTTACTGTG	8.13842	2.48921	3.07117e-09	5.58396e-07		TTTGAGACTAACGTTAGGGCTAAA	4.85776	5.28646	8.73048e-06	0.00129592		ATTAAATTCGAATCTGACAATA	-6.06132
AGAACTGGCACGGACAAG	-9.29462	4.16386	2.55229e-10	4.48882e-08		GGTGAATTTAGGGACAGGTCTTCTAAACTTGTTTAAA	5.37136	3.42888	4.75949e-07	7.27974e-05		TTTGAGACTAACGTTAGGGCTAA	-5.98238	9.21794	6.46835e-09	1.41747e-06		CGCGCCTGTCACG	-8.6003	5.76227	2.72783e-06	0.000359021		GGTTCCGGGGGAAGTATG	6.40587	6.64411	5.36998e-06	0.000909501		AAATTCTTGGACCGTAGCGA	-6.92633	5.88527	2.52153e-07	4.10154e-05		TAATTTTTATAACACAATCAT	7.57446	1.96541	3.1148e-09	5.62171e-07		TTGGAATGAAGCTAGAAATAGCTTCTAAT	-3.31025	7.81911	8.739e-06	0.00129592		TTAGTTGGATAACTGAGGTAATTCTTGAGCTAATACACGCTT	-6.65768
CCGCCCGTCG	-7.90061	4.63876	2.62494e-10	4.59962e-08		GTATGAAACAATTATTAGTAGCGGCA	-9.08568	4.84643	4.79244e-07	7.29611e-05		GTTCCGGG	8.99125	3.82337	6.46537e-09	1.41747e-06		TAAGGCATTTTGAGGTTGTTC	6.67496	8.77818	2.76619e-06	0.000359565		TGGCAGCGTAGTTAGCTGGTTG	-5.30543	6.32771	5.35502e-06	0.000909501		TACTGGCCTTCAAACTTCTTA	10.7969	6.95104	2.54546e-07	4.12523e-05		TGAAAGACGTTCTATATCTC	4.39669	6.16034	3.16402e-09	5.68954e-07		GATGAATGTATGAAATCGTTTGAACGG	7.23435	4.24683	9.18014e-06	0.00135136		GAAGACTTGACCAGTAGATGATATGAT	-7.35479
ACTTGGATGGGAGACCTCCTGGGAACC	-9.4327	4.29335	2.69349e-10	4.70246e-08		GAATTGGACTAAAACTTGACTGAAGACT	-6.40005	5.10745	4.8054e-07	7.29611e-05		GTCGAATTAGATTATTTCAGTAGGATTATTTCGATACC	-8.35349	5.59387	6.69261e-09	1.45732e-06		TTACGTCCCTGCCC	-6.771	6.69681	2.74876e-06	0.000359565		ATTATAAAATCGTGTC	-6.52694	5.96978	5.43494e-06	0.000917132		TTTGGGATCGAATTAACCAATA	5.93713	6.47963	2.56311e-07	4.13862e-05		TGGGGCGGTA	6.26209	3.01315	3.17852e-09	5.69467e-07		GTCTAACTCGTTGAAATTCTGCTACT	7.23435	4.24683	9.17516e-06	0.00135136		GAGACCTCCTGGGAACCG	6.38743
CCGGAGAGGGAGCCTGAG	-9.26187	4.13323	2.72807e-10	4.72947e-08		AGCTGG	5.39449	3.45102	4.8546e-07	7.34391e-05		CTGCCCGGAAC	9.00695	3.83762	6.69911e-09	1.45732e-06		GACTCCGGAGA	-8.60548	5.76646	2.76102e-06	0.000359565		GAGACCTCCTG	6.36369	6.60622	5.49559e-06	0.000921252		AAAAGAAAGATCAGAGTCGTG	8.74741	4.93472	2.58943e-07	4.16003e-05		GAAGTCGGAACCC	6.20523	2.95199	3.34604e-09	5.97293e-07		GTGTTTGG	3.89299	5.7882	9.27639e-06	0.00136055		TCCGATGTGGTCTAGTGGTTAGGATTTGTGGCTC	-5.80347
GGTTCCGGGGGAAG	-9.26045	4.13244	2.73974e-10	4.72947e-08		GGCGAATTTAGGGACAG	5.60892	2.52809	4.94892e-07	7.45938e-05		GATAATCTTTGGCTTCTTGACAACA	-9.85787	5.15055	6.77262e-09	1.46688e-06		GCACCACCAGG	-6.10033	7.44071	2.80615e-06	0.000363433		TGGGAACCGTTAGTGGC	6.26325	6.53864	5.49936e-06	0.000921252		ATGCACCGGATCCCGTCC	-5.57639	6.65287	2.59524e-07	4.16003e-05		AGCGGGGAAA	7.56744	1.96018	3.46421e-09	6.14286e-07		GGAACTTCGAAGATCTTTGTAACT	7.24497	4.25788	9.31909e-06	0.00136184		GTAATATTCGGAAAGCGTTTTT	-7.32518
ACTATGACTCTCTTA	-8.16322	4.83381	2.74865e-10	4.72947e-08		GTAATTGTGGATTCATTTGAGGAAG	-8.95882	4.72743	4.97594e-07	7.47293e-05		ATCCCGTCCGATCTCCG	9.10025	3.92246	6.79223e-09	1.46688e-06		TTAAGTAGTTGTGCCGTAGGTCG	5.25946	8.81775	2.95221e-06	0.000380963		TAATACTGCCTTAGACGGCTAA	-5.45323	5.72111	5.56111e-06	0.000928221		ACGGGGGCATTCGTATCGCTACGTTAGA	-8.89215	5.176	2.60646e-07	4.16288e-05		TCATTTTATGATTGCGTTAT	7.56744	1.96018	3.46636e-09	6.14286e-07		GATACGTTCATTAAGGCAATCTTCGTCT	7.23908	4.25387	1.00055e-05	0.00145685		GAACGGGCTTGG	9.59444
GCCCGGAAC	-7.08848	6.04435	2.73108e-10	4.72947e-08		GTGAAATCTTAACTATATCAGAGGCT	-10.846	6.53973	5.10302e-07	7.52627e-05		GTATTGTTGGTACGAATCGTAGACA	-9.80209	5.09531	6.92184e-09	1.48947e-06		TGGGAGAGGGCTGG	-5.85926	8.33893	2.99904e-06	0.000383105		GGACCAGGGG	8.91351	5.86944	5.66028e-06	0.000934825		TCGAGTCCCATCGGAATCGTCAACCTTTT	6.38219	5.43645	2.62676e-07	4.18016e-05		TTTGCTTATGTTTCCACGATCA	8.12185	2.46887	3.51093e-09	6.19938e-07		GGTGAATTTAGGGACA	-5.68186	7.6453	1.01948e-05	0.00147905		TTTGGGAACATGTTCAGAACCTT	-5.97518
TTAGGGTTCGACTCCGGAGAG	-7.33409	4.87582	2.78508e-10	4.77491e-08		GTATTTATTTATTGTGTTTGGAGA	-9.06276	4.82435	5.08494e-07	7.52627e-05		TTAGTGGCG	9.10843	3.9299	6.97481e-09	1.49547e-06		CACCGCCCGTCGCTGCCCGGAACT	-6.55933	7.87115	3.02259e-06	0.000383105		GTTCCGGGGG	5.32421	7.06783	5.68058e-06	0.000934825		TTGCACATAGACTATTCTGA	8.70956	4.89825	2.67675e-07	4.23692e-05		ACCGCCCGTCGCT	6.43473	2.43883	3.55313e-09	6.20669e-07		GTTTGTGTTGTACTAGAACTAATACTC	5.36352	4.93406	1.05883e-05	0.00151428		TTTCACAGTAGATTATTGGTA	-9.36508
AGAACTGGCACGGACAAGAGGAATCC	-9.24278	4.11575	2.82024e-10	4.81785e-08		GGAGAAGTTGTTGGTTGTGGAATCAA	-8.98554	4.75208	5.10862e-07	7.52627e-05		TGACTAGAACATTACTTTGAA	-7.72276	8.45624	7.01754e-09	1.49924e-06		TACGTCCCTGCCCTTTGTACACA	-6.89681	8.22091	3.02012e-06	0.000383105		GAGAGGAACCGTT	4.88329	9.29292	5.62304e-06	0.000934825		AAGTCTTTCGGTTCCGGGGG	-8.96133	5.23877	2.68166e-07	4.23692e-05		GAAAGATCAGAGTCGTGTTT	7.6324	2.01654	3.53688e-09	6.20669e-07		GAAGTTGTTTTATCTCTGTAGTTAATT	5.34203	4.91413	1.05837e-05	0.00151428		TGGGAACCGTTAGTGGCG	6.81138
CGAGAGGCAGGAAGAG	-7.66505	5.19163	2.86083e-10	4.86975e-08		GAAACGTTATTTTTCTTCGCGGCA	-8.97364	4.74131	5.09017e-07	7.52627e-05		GAGCAATATCATTTCTGTAGGAGGA	-9.89939	5.19075	7.20337e-09	1.52257e-06		TGGATGGGAGACCTCCTGGGAACCGTTAGTGGC	-8.57355	5.73826	2.99444e-06	0.000383105		TGATATGTACAGTTATTCTGT	-4.85459	8.38572	5.68184e-06	0.000934825		TACGTCCCTGCCCTTTGTACA	-6.07994	8.09049	2.72241e-07	4.28595e-05		GCACCGGATCCCGTCC	7.6324	2.01654	3.5476e-09	6.20669e-07		CGCGCGCT	5.32539	4.89981	1.0559e-05	0.00151428		GAGTTTTTAAATTCGTCATCAATAACT	-9.18652
ATACCCGCTGAAC	-9.39496	4.26061	2.92669e-10	4.9355e-08		TGGACCGTAGCGAGACGTCCTAC	5.31022	2.94974	5.1204e-07	7.52627e-05		GTAATTCTAATACGGTCAATGTTGT	-9.81781	5.11107	7.17104e-09	1.52257e-06		TTCCTATGAATCCGAT	-8.58175	5.7461	3.01002e-06	0.000383105		ACAGCTCACTCAATTGCCATG	-6.63784	5.23527	5.75567e-06	0.000943602		ATATAGGTTGGAG	8.6905	4.87987	2.735e-07	4.29045e-05		CGTCGGGT	5.73294	2.42879	3.65464e-09	6.36129e-07		CCAACCATAGCTCAG	4.22054	6.56019	1.0582e-05	0.00151428		TTTGGGAACATGTTCAGAACCTTA	-6.72608
CCCGTCCGATCTCCG	-9.30292	4.17127	2.94088e-10	4.9355e-08		GGGTTATTTTAAACCTTAGATTTGAA	7.78156	2.96307	5.09909e-07	7.52627e-05		CGCCAAGTGTTGG	9.08549	3.909	7.18371e-09	1.52257e-06		TACGTCCCTGCCCTTTGTACAC	-5.85865	8.14906	3.05688e-06	0.000384714		CGGGGGAAGTATG	6.31736	6.58858	5.90301e-06	0.000964326		CGTTGGGCTTTGCCCGCGCG	-5.9753	6.35277	2.77272e-07	4.33419e-05		CGAATCTCGTCCCAAACGTACCTTTT	5.85784	2.99353	3.67122e-09	6.36749e-07		GATATAATACCACATTTACTCTGATTT	7.2462	4.2549	1.07243e-05	0.00152216		TTGCACTTAGATACCTGACTAC	-5.45946
AATGCACCGGATCCCGTCC	-9.24248	4.115	2.9384e-10	4.9355e-08		GATAAAAAATTGTTGTAGTATTTACT	-8.99025	4.75739	5.14649e-07	7.53788e-05		GAGGAATGTATTTACAATTGATGGTAT	-9.8129	5.10634	7.32803e-09	1.53801e-06		TACGTCCCTGCCCTTTGTACA	-5.90629	8.8931	3.05116e-06	0.000384714		AATCGCTGTTGTTTGAACCG	6.6022	6.854	5.94678e-06	0.000964635		TTTGGGATCGAATTAACC	8.76589	4.95256	2.80977e-07	4.34588e-05		GGATCCCGTCC	6.453	2.45207	3.69952e-09	6.3939e-07		GGTATTGAAATTCTGAACATTAACATT	7.19968	4.21929	1.07949e-05	0.00152216		GCATTGACGATTTTCTTGTAGACTATT	-7.35624
TGGACCGTAGCGA	-6.86133	5.81316	2.92929e-10	4.9355e-08		GGTGAATTTAGGGACAGGTCTTCTAAAA	4.87558	4.77063	5.18647e-07	7.56969e-05		GGGAGTTTGACTGGG	7.11303	4.97592	7.32516e-09	1.53801e-06		GGCGGGGA	-5.30959	8.00717	3.08589e-06	0.000384754		TTCTGGGATTGTTTATCTTGGTA	-5.48833	7.09835	5.94471e-06	0.000964635		AACAGCTCATTAAACTGCCTCT	6.65344	4.87105	2.79797e-07	4.34588e-05		TCCGGGGG	7.50733	1.90741	3.84076e-09	6.50019e-07		GTCAATTTCATCTCGTCAATTCCTGGT	7.18764	4.21108	1.07775e-05	0.00152216		GGCTAACACGGACAACTCATCTACTACT	-9.1381
CCGCCCGTCGCTGCCCGGAACTGAGCA	-8.61085	5.32435	2.99091e-10	5.00185e-08		TTTGCGACCAAATTCAGGCCACG	4.54988	5.42821	5.23529e-07	7.59011e-05		GTAATTAACCGTCATATGTGTCAGA	-9.97663	5.26768	7.52749e-09	1.5657e-06		TTAGGGTTCGACTCCGGAGAG	-6.79091	6.71422	3.07127e-06	0.000384754		GAAAGAAGACCCTG	6.22699	6.5054	6.03276e-06	0.000975148		TTTGCGACCTATATCCAGGCCAC	6.27281	5.33066	2.80922e-07	4.34588e-05		GTTGCGAGCT	7.50733	1.90741	3.83607e-09	6.50019e-07		GCTCTTATAAGACAATCAAATCGTGTT	7.18764	4.21108	1.07797e-05	0.00152216		GTCTAATTGTGATTGTTAATTGTTTCT	-9.16262
TACGTCCCTGCCCTTTGTA	-8.32979	6.35838	3.03336e-10	5.04263e-08		TTTTTGGAAGGCCGAGAGGCCTGA	4.56194	4.7248	5.23708e-07	7.59011e-05		CCTGGGAACCGTTAGTG	7.13832	4.18614	7.53877e-09	1.5657e-06		CGGGGCTGCACGCGC	-8.88703	6.02064	3.08961e-06	0.000384754		TAAGCTCGTAGCTACAGGTTTA	-6.02946	8.20573	6.45287e-06	0.00103941		ATAGGTCTATTTGTTTTCTCATG	5.5068	8.56796	2.84291e-07	4.38176e-05		CGATTCCCGGTCAACGCACC	7.50733	1.90741	3.83517e-09	6.50019e-07		GGGTTATTTTAAAGCTTAGATTTGA	-7.70587	4.44476	1.10692e-05	0.00155538		GTCAACATCGTTTCTGTTTCTAACGCT	-9.16262
CTCCGGAGAGAGAGT	-7.8842	4.5678	3.03645e-10	5.04263e-08		GACATCGGTGTTGTTCTTGTAGAA	-8.97577	4.74292	5.25665e-07	7.59193e-05		GTAGGCTGGC	7.31293	4.34847	7.50391e-09	1.5657e-06		GCCCGGTTA	-8.76563	5.91459	3.14114e-06	0.000389807		CCTGAGTCA	-6.60113	5.1992	6.50828e-06	0.00104468		GAGTGAATGTTGTGGAAGATTGTTGTC	8.67074	4.86088	2.93074e-07	4.5014e-05		TGAAGTTTCGGATATAGAAGA	7.50733	1.90741	3.82985e-09	6.50019e-07		AAAAGAAAGATCAGAGTTGTG	7.26109	4.27275	1.16068e-05	0.0016231		TAACCGGATATATTTGACTA	-6.07977
TGTGTCTGATTTCTGCCCA	-7.20054	5.25279	3.06212e-10	5.0676e-08		GTATCTGCTCGTCCTTTGAGGTAACT	-8.98615	4.75342	5.48205e-07	7.88996e-05		TGAGATCATGCCAGTGTCATTA	-9.97327	5.26397	7.56881e-09	1.56648e-06		CGGGGCTGCACGC	-8.60849	5.7684	3.17618e-06	0.000392788		TTTGCGACCTCTATCAGACCTC	-4.66794	11.1242	6.63654e-06	0.00106157		GTTCCGGGGGAAGT	-5.73221	6.80217	2.96868e-07	4.54384e-05		ACACGGACCA	7.50733	1.90741	3.82671e-09	6.50019e-07		GAATATCATTCTGGATCTGTTTTAGTT	7.21063	4.23063	1.16319e-05	0.0016231		ATAGGTCTATTTGTTTTCTCAT	-6.46037
TTGGATGGGAGACCTCCTGGGAACCGTTAGTGGC	-9.23529	4.10811	3.11043e-10	5.11205e-08		GTAACTGCTAGATATCATTGGTTGA	-9.21859	4.97221	5.52515e-07	7.92447e-05		CACTGTT	-7.06964	5.99743	7.70634e-09	1.58924e-06		CGAGAGGCAGGAAGAGATACA	-8.57436	5.7379	3.21343e-06	0.000396019		TCCCTGAGATTTCGTATAACCGGA	-5.24484	6.66412	6.72017e-06	0.00106928		GGAGAAGTTGTTGGTTGTGGAAT	8.65099	4.84188	3.00698e-07	4.58652e-05		AAGAACTGCCTTATGAACTTT	8.10364	2.45568	3.81757e-09	6.50019e-07		TGGCAGTGTAGTTAGCTGGTTGAT	-4.33628	5.42392	1.1731e-05	0.00163126		TTTGCGACCTATTCATGATCAA	-6.37092
AAATTCTTGGACCGTAGCGAGACGTCCT	-9.23529	4.10811	3.10539e-10	5.11205e-08		TTTGGAAGGCCGAGAGGCCTGA	5.17715	6.98079	5.60722e-07	8.01445e-05		GAGAGGAACC	7.68297	5.52886	7.73208e-09	1.58924e-06		CGAAAGTCTTTCGGTTCCGGGGGA	-8.59894	5.7597	3.24019e-06	0.00039794		CAAATCCCACTTCCGTCAAACTTTT	-8.46716	5.24058	6.73117e-06	0.00106928		TTTGAGACTAACGTTAGGGCTA	6.65024	9.59699	3.10694e-07	4.68524e-05		ACCGCGGAAA	6.10395	3.35092	3.87599e-09	6.53718e-07		TGGAATGAAGCTAGAAATAGCTTCTAA	-3.57386	6.01394	1.18527e-05	0.0016425		TGTATTTTAACATCTTTCTTA	-9.13724
TGGACCGTAGCGAGACGTCCTACTGC	-8.14401	4.88062	3.14191e-10	5.12841e-08		GTGATAGTTTCGGGTTTTGAGCAAT	-9.01941	4.78496	5.80963e-07	8.18311e-05		GTATGAAACAATTATTAGTAGCGGCA	-9.87054	5.16299	7.81387e-09	1.59524e-06		TTCTTGGACCGTAGCGAGA	-8.52941	5.69769	3.37458e-06	0.000413021		GCACGGACAAGAG	5.55344	6.74097	6.77009e-06	0.00107177		TTTGCGACTAAACCTAGATCAA	5.03853	8.55272	3.10764e-07	4.68524e-05		TGGGA	8.02557	2.37321	3.92931e-09	6.60435e-07		CATTATGTCGATACAACTTGAACTGAGCT	3.60394	6.67458	1.19422e-05	0.00164921		CAAAAACATTTTCAGTAGTCA	-9.38606
CAGCGGGGAA	-7.2845	5.29288	3.13332e-10	5.12841e-08		GTATATGATTTATTGTTGGGATAAT	-8.91837	4.68994	5.7817e-07	8.18311e-05		TGGCACGGACAAGAG	5.97436	4.74969	7.81635e-09	1.59524e-06		AATGATTGTTGTGGTTAAAAAGCTCGTAGTTGGATT	-8.64496	5.80435	3.4108e-06	0.000416024		GGAACCGTTAGTG	8.87188	5.83217	6.80177e-06	0.0010731		AAAGTCTTTCGGTTCCGGG	-5.58913	6.91166	3.11316e-07	4.68524e-05		GCGAAAGGATCATC	5.11031	1.92135	4.13862e-09	6.88518e-07		GTTTGATTGATTGTTCTTTGATTGATT	5.31231	4.88817	1.21149e-05	0.00166734		GTGAATCCGTGG	-9.11316
TGGCGGGGAGTT	-7.29692	5.72473	3.18736e-10	5.18485e-08		GATATTGGTTGATCCTTTTCTGTAGA	-8.91324	4.68515	5.8187e-07	8.18311e-05		GGCCGGAC	8.96665	3.8011	7.8416e-09	1.59524e-06		GACCTCCTGGGAACCGTTAGT	-6.35176	7.15841	3.49129e-06	0.000423452		TGGGAACCGTT	5.6363	6.81776	6.93405e-06	0.00108854		TCTTTCGGTTCCGGGGGA	-7.00045	5.95376	3.11694e-07	4.68524e-05		TTTTATTTCAATAATATTTGTT	7.63972	2.02169	4.13526e-09	6.88518e-07		GATACAATATCGTTGATTTTGAAAATT	7.2271	4.24584	1.26925e-05	0.00174087		CGAATCCCACTCTCGTCAACAACTCTTT	-9.16283
TCTTTCGGTTCCGGGG	-9.20499	4.08019	3.21723e-10	5.19796e-08		AGAACTGGCACGGA	5.09118	2.72685	5.78567e-07	8.18311e-05		TGGCTTGTGGC	6.67998	4.55721	7.92357e-09	1.60099e-06		GGATCCCGTCCGATCTCC	-9.01053	6.14053	3.49548e-06	0.000423452		GAATGCACCGGATCCCGTCC	5.28962	7.03567	6.94692e-06	0.00108854		CCGCCCGTCGCTGCCCGGAACTGAGC	-7.56702	6.49052	3.12484e-07	4.68524e-05		TTGAAGTTGTAGAGAAGATGTT	7.63972	2.02169	4.13614e-09	6.88518e-07		TGACTAGAACATTACTTTGAAA	4.31049	5.95204	1.28159e-05	0.00174587		GATACTTGTTAATAGGTTACTGTTGGAT	-9.23358
TAGGGTTCGACTCCGGAGAGGG	-7.98093	4.7148	3.21081e-10	5.19796e-08		CAGTAATTTGTTTAATAAAAATATAGCATTTGGA	6.94772	2.24759	5.82392e-07	8.18311e-05		ACGTGGGATG	6.7837	4.59824	7.92136e-09	1.60099e-06		TGATTACGTCCCTGCCCTTTGTACACA	-8.6137	5.77258	3.55918e-06	0.000428256		AGTCTTTCGGTTCCGGG	5.64931	6.82872	7.0205e-06	0.00109512		CGGTTCCGGGGGAAG	-6.28518	6.64804	3.18742e-07	4.76287e-05		CTATATGTTGAGACTACTTTCTGAACT	8.09753	2.45127	4.1606e-09	6.89827e-07		TGGCAGTGTGTTTAGCTGGTTG	-5.27352	4.15367	1.27757e-05	0.00174587		TTTGCGACTGTATCCAAAAC	-6.20938
ATTCTTGGACCGTAGCGAGACG	-9.318	4.18521	3.25601e-10	5.24284e-08		GTAGACTTTTAAGAAATTGGATCT	-9.01942	4.78496	5.85847e-07	8.20384e-05		GAAACGTTATTTTTCTTCGCGGCA	-9.76185	5.05601	8.03219e-09	1.61201e-06		CAGTGGTAGAGCATGTGACTGCA	-8.6725	5.82545	3.55267e-06	0.000428256		AAAATCGTG	-5.15698	5.98343	7.03646e-06	0.00109512		AATGTTATCCGTTTGTTATCT	8.67066	4.86082	3.20943e-07	4.77956e-05		AACTATGACTCTCT	7.51437	1.91272	4.20107e-09	6.94184e-07		GACCTGATCGTTTTGGTACTTTAACCT	7.17032	4.19536	1.32274e-05	0.00179584		GTTTCTTAATAAATCTGTGAATTCCAT	-9.34417
TCGGTTCCGGG	-9.25563	4.12862	3.2977e-10	5.27579e-08		TCCGATGTAGTCTAGTGGTTATGATTTGCG	-5.38924	6.6886	5.91064e-07	8.24902e-05		GGAAGTCGGCA	7.42866	4.39071	8.02949e-09	1.61201e-06		GGGTTATTTTAAAACTTAGATTTAA	8.87164	5.93042	3.63902e-06	0.000436388		CGA	-4.74599	6.87641	7.07399e-06	0.00109725		TTTTGTATTGCTGAATTTTTG	8.6308	4.8225	3.42378e-07	5.08161e-05		CGGGCTTATCTTTT	5.45429	3.33091	4.49331e-09	7.39973e-07		GTTAAATATTATACTCAAATCTATTGG	7.1519	4.18288	1.32899e-05	0.00179826		TCATTTTATGATTGCGTTATA	-7.39689
TCCTGGGAACCGTTAGT	-7.25863	4.80374	3.29861e-10	5.27579e-08		GTAGACTTTTAAGAAATTGGATCTA	-8.95944	4.72881	6.03647e-07	8.39637e-05		GTAATTGTGGATTCATTTGAGGAAG	-9.74974	5.04404	8.17453e-09	1.63507e-06		TGGCAGTGTGGTTAGCTGGTCG	8.65652	5.72264	3.68116e-06	0.000438489		TGGAATGAAGCTAGAAATAGCTTCTAAT	-6.57571	5.17256	7.18871e-06	0.00110759		GAGTCATTCTCTGAACTAACCTTGTT	8.63096	4.82264	3.51686e-07	5.20224e-05		GTCTTACGCTCATCTCC	5.66675	2.89568	4.5943e-09	7.54067e-07		CATAGACTATTCTGAAATTGT	7.25514	4.26878	1.33498e-05	0.00179855		GTTGATAAGTAACTAACCATTGTTGGC	-7.39689
CCGCCCGTCGCTGCCCGGAACTGA	-9.52872	4.38396	3.36107e-10	5.33985e-08		AGTGTAGTTAGCTGGTTG	5.22962	2.22758	6.15512e-07	8.50547e-05		AGCCAAAAATGTTCGCAAATT	-9.91319	5.20515	8.20259e-09	1.63519e-06		GTTGGATAGAATGTATGACTTCT	-8.49339	5.6657	3.67008e-06	0.000438489		ATATATATAGGTTGGAG	-8.44387	5.22052	7.17337e-06	0.00110759		CGAATCCTGCCAGGATCGTTATCTTT	8.65079	4.84172	3.54142e-07	5.20381e-05		AGATCAGAGTCGTGTTTATGGG	8.12635	2.48052	4.67886e-09	7.65376e-07		GAATAGTTTCTGTAACCTGATAAAGTT	5.30331	4.85613	1.33816e-05	0.00179855		GATAAATAGTCTTTTGGATCGTCAGGT	-9.1136
TGCCCGGAACTGAGC	-7.80674	5.84186	3.35622e-10	5.33985e-08		AATGGCCCCTTTGAACGTGTGCG	5.22966	2.22757	6.15595e-07	8.50547e-05		GTATTTATTTATTGTGTTTGGAGA	-9.84882	5.14117	8.35272e-09	1.65708e-06		GTTGTTTGAACCGGGCAA	-8.60746	5.77027	3.69923e-06	0.000439173		AAGGGAACGG	9.59849	6.49716	7.21773e-06	0.00110775		CGAAAGTCTTTCGGTTCCGGGGGA	-8.66018	4.96699	3.54153e-07	5.20381e-05		TGAAACCGCGGAA	5.83295	3.46245	4.73014e-09	7.71186e-07		ACCTGGCCGGGAGTCTCTGGTGAT	7.18157	4.20697	1.35732e-05	0.00181822		GAAAAAATCGTTTTACTATCTTATGTT	-9.21045
TCTTTCGGTTCCGGGGGAA	-9.21554	4.08956	3.37686e-10	5.34711e-08		GGGGATATAGCTCAGGGGTAGAGC	-7.40803	6.0903	6.21814e-07	8.56285e-05		GATAAAAAATTGTTGTAGTATTTACT	-9.78004	5.07424	8.39576e-09	1.65708e-06		GGTGAATTTAGGGACAGGTCTTCTAAACTTGTTTTGAGCTAG	5.96484	6.2716	3.71977e-06	0.000440144		GGGTTATTTTAAAACTTAGATTTG	-11.3439	8.11938	7.23784e-06	0.00110775		TTTGCGACCTCTATCAGACCT	5.37655	6.88188	3.55536e-07	5.20677e-05		TCTTGGACCGTAGCGAGAC	5.90093	1.94971	4.81648e-09	7.75073e-07		TGGCAGTATGGTTAGCTGGTTG	-5.15956	4.06144	1.40044e-05	0.00186975		ATGGACTAAAAGCAATTTCAGA	-6.57143
ACCGTAGCGAGACGTCC	-7.98993	4.72343	3.50391e-10	5.52991e-08		TTTGCGACCATATTCAAAGCCCGT	7.03173	2.3142	6.24855e-07	8.56477e-05		GTCGCTGCCCG	7.1024	4.14494	8.38956e-09	1.65708e-06		CCTGGGAACCGTTAGTGGC	-8.86334	5.99867	3.73866e-06	0.000440914		TACCCGTAGTCCAA	-5.33756	6.62506	7.37148e-06	0.00112447		GTTGGAATTTTGAGAGATGTTTAAG	8.63072	4.82243	3.65845e-07	5.32238e-05		TCACCGAATCCACAATGTCTTA	5.90093	1.94971	4.81345e-09	7.75073e-07		TCACCGGGTATACATTCATC	4.23353	5.88003	1.40877e-05	0.00187465		TTAAATGAAGACAACCGCTAACCTGAGTC	-9.50509
CCCGCTGAAC	-9.23617	4.11036	3.56233e-10	5.60355e-08		CGGTGAATTTAGGGACAG	7.03173	2.3142	6.26086e-07	8.56477e-05		GGAGAAGTTGTTGGTTGTGGAATCAA	-9.77549	5.0691	8.4781e-09	1.66781e-06		GCACGCGCGCT	-5.94713	6.76663	3.76243e-06	0.000442254		ATGGGCCTATGTGCGTCTCGTG	-8.51083	5.28759	7.40565e-06	0.00112595		CGCCCGTCGCTGCCCGGAAC	-6.11806	5.96592	3.65426e-07	5.32238e-05		TCGAATCCTGCCAGGATCGTCACTTT	5.90093	1.94971	4.81221e-09	7.75073e-07		GAACCTTTTGATATTCGGATATTTCATT	7.14569	4.17871	1.42194e-05	0.00188592		ATATC	-9.11251
TTTGCGACAGTTGTTGGCTTA	7.62949	7.4426	3.59232e-10	5.63214e-08		GCCTAATTCGTTAATCTGTAATACT	-8.91523	4.68695	6.33004e-07	8.61295e-05		CTCCGGAGAG	6.98579	5.325	8.66256e-09	1.69849e-06		GCTGTTGTTTGAACCGGGCA	-5.68666	7.71615	3.78771e-06	0.000442634		ATAAAATCGTG	-5.09412	6.14634	7.4316e-06	0.00112618		TCCCTGAGACTCTACTTGTGAA	8.70941	4.89812	3.68936e-07	5.34969e-05		TGAGATTCTCTTTCCTTCATTC	5.90157	1.94947	4.81737e-09	7.75073e-07		ATTGCACATAGACTATTCTGA	8.71581	5.53663	1.43104e-05	0.00189175		TCTATATGTTGAGCATACTTTCTGAACT	-6.58521
GAATGTTTAGAAACTCTTAGAACT	10.7877	6.17692	3.84767e-10	6.01271e-08		GTTGATAGCTCTGGATTTTGTGCATT	-8.89142	4.66466	6.34821e-07	8.61295e-05		GTATCTGCTCGTCCTTTGAGGTAACT	-9.77281	5.06711	8.79439e-09	1.70853e-06		AGGGCACCACCAGGAGTGGAGCCTGCGGC	-8.72906	5.87648	3.79052e-06	0.000442634		AAAGTCTTTCGGTTCCG	6.1891	7.90996	7.45687e-06	0.00112631		CCGCCCGTCGCTGCCC	-5.05381	9.37697	3.73811e-07	5.40083e-05		CGCGCGC	7.8018	2.16622	4.83579e-09	7.75486e-07		TCCCATGTAGTCTAGTGGTTATGATTTGCGGCTCTC	3.39845	6.8247	1.48099e-05	0.00195136		TATAAAGATGAAGTTTCGGATA	-9.11382
CGGATCCCGTCC	-8.3502	5.07451	3.87422e-10	6.03441e-08		GCATAACTGAACATTAAAAATAAAATT	-6.31694	5.02939	6.35841e-07	8.61295e-05		GTCGCTGCCCGGAAC	8.91572	3.75511	8.79979e-09	1.70853e-06		GGTGAATTTAGGGACAGGTCTTCA	8.50922	5.58314	3.81306e-06	0.00044381		GAGGGTGATAT	-5.80627	6.13045	7.50619e-06	0.00113005		GCACCACCAGG	-5.8861	6.64666	3.74913e-07	5.40083e-05		AGGG	4.9734	3.78032	4.87356e-09	7.76452e-07		TGGCAGTGTGGCTAGCTGGTTG	-4.71166	4.94616	1.53347e-05	0.00201391		GGCAATTCTTGAACAAGTGTATCTACT	-9.16305
CCGGGGGAA	-7.60796	5.1438	3.93172e-10	6.10403e-08		GAAACATCAAAATTATTCCGTGGGAT	-10.5262	6.22716	6.40518e-07	8.64761e-05		TTAGAGTCGTGTT	8.9411	3.77802	8.76074e-09	1.70853e-06		AGGACGTGAAACCGAT	-6.5716	8.29655	3.86991e-06	0.00044896		TGTTTGAACCGGGCAAA	8.88287	5.84104	7.53478e-06	0.00113066		TAAAGATGAAGTTTCGGATAT	8.58972	4.78309	3.77511e-07	5.42054e-05		GAATGCACCGGAT	6.51261	2.45995	4.859e-09	7.76452e-07		GTTCTGTTATGTAGGATTTGGAATCTT	7.12784	4.16257	1.54594e-05	0.0020185		GGAACGGGCTTG	6.42791
ACTCCGGAG	-7.88885	4.57243	3.98579e-10	6.16788e-08		GTTTTCCATTGAGAAGTAGCTCTGAGTT	-8.88942	4.66285	6.42572e-07	8.64761e-05		GACATCGGTGTTGTTCTTGTAGAA	-9.76654	5.06027	8.95718e-09	1.73345e-06		CGAAGGCGATCAGATACCGCCCTAGTTCT	-8.50287	5.67352	3.95962e-06	0.000457876		TTGGAATGAAGCTAGAAATAGCTTCTA	-5.07682	5.90495	7.62819e-06	0.00113727		GTCTTTCGGTTCCGGGGGAAG	-8.63348	4.94315	3.79525e-07	5.43177e-05		AGAGTCGTGTTGCT	5.64455	3.24516	5.22584e-09	8.29874e-07		GAACATGTCAACTAAATATGAACTA	7.12784	4.16257	1.54701e-05	0.0020185		ATAAAAAGTGTTGTT	9.49818
AACAGCGGGGA	-7.83597	4.57775	4.01846e-10	6.17831e-08		TAATACTGTCAGGCAATGACGCT	5.46401	3.08336	6.53812e-07	8.77038e-05		TCACTGTT	-7.56777	6.11588	9.09091e-09	1.75363e-06		TGGACCGTAGCGAGACGTCCTACTGC	-6.76339	6.67741	4.03457e-06	0.000463533		TGAGATCATATTAGACCCATCT	-5.93275	13.3214	7.62352e-06	0.00113727		TTTGCACCTTATTCAATCACC	6.1359	6.71562	3.87174e-07	5.48779e-05		CGAGCCCCCTGGAGGGCTTTATCTTT	5.79624	1.83424	5.33228e-09	8.44036e-07		AAAGATCAGAGTCGTGTTTAT	7.24909	4.2648	1.58623e-05	0.00206297		GTTAAGAATAGT	-6.40823
GAGGTGAAATTCTTGGACCGTAGCGAGACGTCCTAC	-7.6897	5.73371	4.01395e-10	6.17831e-08		TTGGGCTAGAATGTATTTACC	-6.34944	5.05995	6.61873e-07	8.84988e-05		GTATATGATTTATTGTTGGGATAAT	-9.70768	5.00299	9.16078e-09	1.76141e-06		CAGGGCGGTGGCC	-8.66694	5.8202	4.03424e-06	0.000463533		TTTGCGACCGAATTCAGGCCACG	-5.56672	9.8884	7.76361e-06	0.00115372		AGTCTTTCGGTTCCGGGGGAA	-5.78898	6.85442	3.86795e-07	5.48779e-05		TGAACCGGGCA	6.08181	3.33651	5.49094e-09	8.66346e-07		GTGCGGTGATTAAGAGAATTTCTGAGCT	4.5034	5.45675	1.59877e-05	0.00207258		TTGCACATAGACTATTCTGA	-6.38973
ACACACCGCCCGTCGCTGCCC	-9.75059	4.59507	4.06616e-10	6.22635e-08		TTTGGAAGGCCGAAAGGCCTGA	7.01447	2.30137	6.72808e-07	8.96717e-05		GATATTGGTTGATCCTTTTCTGTAGA	-9.7045	4.99983	9.48475e-09	1.81506e-06		TCCCTGAGATTTCGTATAACCGG	9.20835	6.25346	4.08788e-06	0.000468148		TACCCGTAGTCCGATGCTGTCA	-4.88709	6.96818	7.8942e-06	0.00116936		GAAGGGCACCACCAGGAGTGGAGCCTGCGG	-6.83727	5.80461	3.85314e-07	5.48779e-05		AAGGAAGATGTTAATATACATC	7.73941	2.12182	5.62867e-09	8.85221e-07		GAGTGAATGTTGTGGAAGATTGTTGTC	5.26231	4.81974	1.61374e-05	0.00208526		TTGCGACCTATTCATGATCA	-5.51087
GACTGTGTCTGATTTCTGCCCAGTGCA	-9.14948	4.02842	4.07737e-10	6.22635e-08		GATATTTAGTCTTTTTAGTTGGAGT	-8.9996	4.76653	6.91997e-07	9.12206e-05		AGGGAACTAGTATATTTAGTACAATGGTCTGTAAAACTGGAGGTTTGTTTCCCT	-8.25694	5.49879	9.51408e-09	1.81506e-06		TTTGCGACTGTATCCACATCAC	4.96675	10.241	4.17567e-06	0.000476668		TGTTTGAACCGGGCA	5.34899	8.05202	7.99139e-06	0.00117996		ATTCTTGGACCGTAGCGAGACGTCCTACT	-5.09385	7.39672	3.97816e-07	5.62055e-05		TTTGCGACTGGATTCAGGCCAT	5.88745	3.1444	5.67416e-09	8.86673e-07		TTTCACCTGTCTTTCCAAGA	7.26426	4.26697	1.63792e-05	0.00210651		TGAGATCATATTAAACCCATCT	-4.84137
GTAAGCATCAACAAACAATTTGACA	10.8136	6.20288	4.08889e-10	6.22635e-08		GAATTTGTTGAAGCTCCTTGAAACA	-8.92254	4.69337	6.93119e-07	9.12206e-05		GTGATAGTTTCGGGTTTTGAGCAAT	-7.85631	5.1053	9.53709e-09	1.81506e-06		GGTGAATTTAGGGACAGGTCTTCTAAACTTGTTTTG	6.55175	5.5989	4.21756e-06	0.000478384		TTGCGTGTGGGAGGGATGCGTTCGCGCACTCTCCCGA	-5.27572	5.58086	8.03663e-06	0.00118285		TTTGCGACTGTATCC	6.09042	5.69013	4.00523e-07	5.62276e-05		TGAGATCAAATTAAACTTATCG	6.63391	6.16958	5.66089e-09	8.86673e-07		GTTGTATTCTCTTGATTAGTAGCGGGT	7.14034	4.17099	1.64067e-05	0.00210651		GACTATTATTCATTCATTGTATCGACT	-9.30122
CCGCCCGTCGCTGCC	-10.962	5.77529	4.30123e-10	6.4875e-08		AGAGGAATCCGACTGT	6.8638	2.18167	6.93232e-07	9.12206e-05		TGAGATCATTATGAAATCACGAT	-7.83683	5.08604	9.56161e-09	1.81506e-06		GAAGGGCACCACCAGGAGTGGAGCCTGCGG	-6.6632	6.59603	4.20612e-06	0.000478384		ATTTTTGGAGGCTCTCCTTCGGGTGAGCGAT	-8.38567	5.16057	8.13845e-06	0.00119402		AAGTCTTTCGGTTCCGGGGGA	-6.88188	5.84227	3.99979e-07	5.62276e-05		TTGGGA	5.04513	1.86767	5.76985e-09	8.98755e-07		CAGTAATTTGTTTAATAAAAATATAGCATTTGG	-8.15914	4.85635	1.65818e-05	0.0021222		AAACAAATTGAAGAAAACACTGAATTTC	-9.13897
TACTGAATGCACCGGATCCCGTCC	-9.14398	4.02356	4.29006e-10	6.4875e-08		GGTGAATCTAGG	6.8638	2.18167	6.92119e-07	9.12206e-05		GGGCTTGATTGTCGTTTTGGTACA	-12.2021	7.47373	9.69973e-09	1.83152e-06		AGTCTTTCGGTTCCGGG	-6.03264	6.8447	4.25726e-06	0.000481354		GACCAAGGAGTGTATT	8.85814	5.81889	8.18395e-06	0.00119688		CGGTTCCGGGGGAA	-5.10357	8.31993	4.04054e-07	5.64215e-05		CGAATCCTGCCAGGATCGTCACCTTTT	5.59083	3.19407	5.87792e-09	9.12683e-07		GATAGAGGATCGCTTTTTTAGTAACT	7.19228	4.21842	1.67208e-05	0.0021302		TTAAAGCTTAGATCAAACGTC	-6.02091
CACCGCCCGTCG	-7.63784	5.1652	4.2817e-10	6.4875e-08		GTAGATGTCGTCCTTTATAGCAAT	-8.94646	4.71662	7.11708e-07	9.30609e-05		GTCGAATTAGATTATTTCAGTAGGATTATTTC	-10.3953	5.68076	9.71023e-09	1.83152e-06		CCTTAGATGTCCGGGGCTGCACGCGCGCT	-9.06147	6.1806	4.28323e-06	0.000482758		TTCATTGTCCAGCGTTGAACCG	-5.35182	6.14517	8.25859e-06	0.00120398		GTCTTTCGGTTCCGGGGG	-5.30102	7.03128	4.04465e-07	5.64215e-05		TTAGAGTCGTGTTGCT	5.80553	4.50855	5.93569e-09	9.18735e-07		AGCTGGTTAGCTTAAATAAAAGCTCCTGACTTTTAATCGGGTGATGGGTTTCCCACTGGCTACCA	-3.89022	5.75411	1.67503e-05	0.0021302		TGATAT	-5.4221
TTCTTGGACCGTAGCGAGAC	-9.17798	4.05574	4.34922e-10	6.53567e-08		GTCTAACTCGTTGAAATTCTGCT	-8.881	4.65493	7.09794e-07	9.30609e-05		CCCCCAGGATA	6.80563	4.67602	9.74049e-09	1.83152e-06		AAAGTCTTTCGGTTCCGGGGG	-5.4335	7.9494	4.31797e-06	0.000483053		AGACCTCCTGGGAACCG	6.56061	6.81531	8.45997e-06	0.00122944		AATTCTTGGACCGTAGCG	-6.8301	5.79459	4.06676e-07	5.65511e-05		CATAAACACCACTTTGATCTA	7.52163	1.91804	5.96286e-09	9.2003e-07		TATTTGAAACTTCATCTTTGT	7.05888	4.10786	1.85239e-05	0.00234095		CCTGCGAAAGGATCATT	-6.06521
AGCTGGACCAGGG	-7.07343	5.51134	4.36059e-10	6.53567e-08		GAAAGTTTTTCATACTATCGTCCACG	-8.8642	4.63978	7.22678e-07	9.41982e-05		GCCTAATTCGTTAATCTGTAATACT	-9.70333	4.99871	9.77876e-09	1.83293e-06		TCGGAAACGAAAGTCTTTCGGTTCCGGGGGAA	-8.45402	5.63048	4.32283e-06	0.000483053		TGAGATCATGTTAGACTCATA	-4.66603	8.74626	8.48902e-06	0.00122979		GATAGATGTAGACTGTGTCTGATTTCTGCCCAGTGC	-8.60451	4.92157	4.09971e-07	5.66518e-05		GTACTCCGGAGA	5.83906	1.89667	6.17812e-09	9.48996e-07		TTTGGCACTTAGGAATTCCACT	-3.99407	5.69111	1.84883e-05	0.00234095		GTTATTATCATCCAACTGTACTTTTGT	-9.03657
GCCCGTCGCTGCCCGGAACTGAGCA	-8.4372	5.15554	4.37899e-10	6.54268e-08		GCATTGAAGGAGCATTATCGTTAGA	-8.91345	4.68595	7.27577e-07	9.45394e-05		GTAGACTTTTAAGAAATTGGATCT	-9.80757	5.10154	1.00896e-08	1.88526e-06		GCATGTGGCACCA	-8.45402	5.63048	4.32653e-06	0.000483053		ATCCCGTCCGATCTCCG	8.98146	5.92918	8.7589e-06	0.00126491		CGGGGCTGCACGCGC	-8.94673	5.22437	4.08868e-07	5.66518e-05		GCGCGC	5.83965	1.89643	6.2088e-09	9.48996e-07		ATTGGAAGAAAAGAAAGATCA	7.15926	4.18358	1.87141e-05	0.00235757		TCAGAGTCGTGTTTATGGGTA	-9.03657
CCCCCAGGATAGC	-9.24706	4.12102	4.42217e-10	6.58655e-08		GCAAAAGTTGTACCATGACGTTGAGG	-8.86498	4.64037	7.34953e-07	9.49514e-05		GTAGGCTGGCG	6.19656	4.99926	1.01339e-08	1.88763e-06		GTCTTTCGGTTCCGGG	-5.36582	7.6701	4.38219e-06	0.00048653		GTTAAGCGGAGGA	8.95639	5.90877	8.86917e-06	0.00127683		ACACCGCCCGTCGCTGCCCGGAACT	-6.73949	6.55197	4.12993e-07	5.68911e-05		AACCGCGGAA	5.83965	1.89643	6.20806e-09	9.48996e-07		GGAACTTCGAAGATCTTTGTAACTA	7.09059	4.13335	1.88661e-05	0.00236929		GGGCTTGATTGTCGTTTTGGTACACA	-9.03657
CTCCTGGGAACC	-9.15926	4.03814	4.54785e-10	6.75263e-08		GAAACTTTTGAAGATTGTTGGTTACT	-8.85307	4.62916	7.35329e-07	9.49514e-05		GTAGACTTTTAAGAAATTGGATCTA	-9.74887	5.04381	1.04648e-08	1.93804e-06		CGGGCCGGACACTAT	-6.65911	6.59232	4.385e-06	0.00048653		TCACCGAAGTCATGAAGTTTAA	-5.68418	7.50006	8.98497e-06	0.00128947		CGGTTCCGGGGG	-5.12766	7.30788	4.16926e-07	5.72539e-05		ATCGTGTCGGTGGAT	5.37812	5.42189	6.34569e-09	9.66897e-07		CGAATCCTGCCAGGATCGTTACCTTT	4.19297	5.55145	1.91171e-05	0.00239333		GAAAGAACGAATGACCTTACAAGA	-9.0633
GCTATGGCAAGTC	-9.12294	4.0039	4.69775e-10	6.93709e-08		GTTTCTGTGTATTCTGGATATGACACA	-8.85155	4.62804	7.45657e-07	9.5986e-05		GTTGATAGCTCTGGATTTTGTGCATT	-9.68116	4.97686	1.04696e-08	1.93804e-06		TTTGCGACCTATTCATGATCA	5.64316	7.6918	4.42773e-06	0.000489745		TGGCGGTGTGGTTAGCTGGTTG	-5.75048	5.97813	9.01652e-06	0.00128998		TGAGATCATGCCAGTGTCATT	5.17841	7.1578	4.20579e-07	5.75763e-05		TATGATTGCGTTATAAAAATTG	7.75716	2.12441	6.64258e-09	1.00899e-06		GAATTTGGAAGTGTAACTTTT	5.24241	4.80492	1.94205e-05	0.00241834		TTGGGAACATGTCCAGAACCTTA	-6.02666
CCTATGAATCCGAT	-7.84286	4.58891	4.71266e-10	6.93709e-08		TGGCAGTGTGATTAGCTGGT	4.99899	3.70515	7.65871e-07	9.82829e-05		GTTTTCCATTGAGAAGTAGCTCTGAGTT	-9.68082	4.97652	1.05022e-08	1.93806e-06		GGTGAATTTAGGGACAGGTCTTCTAAAC	5.70964	6.75937	4.45218e-06	0.000490925		GGAGGT	-5.25901	5.84748	9.12653e-06	0.00129821		TTTCGGTTGACTCAAAATATCCTTGCTGATTTTGT	6.22534	5.71831	4.3613e-07	5.93366e-05		TTATCTGAGCGG	5.87068	1.8945	6.73884e-09	1.01918e-06		TTTGGAATGAAGCTAGAAATAGCTTCTAAT	-3.12935	7.32537	1.94373e-05	0.00241834		GTATGGTCTAGCATGG	9.42254
GATTTATTTATTTTGTTAGTTGGGTT	10.7164	6.10651	4.71574e-10	6.93709e-08		GAATAGTCTGGGTATGAAACTGGTG	-8.9259	4.69619	7.73388e-07	9.86017e-05		GGGAAGTCGGCA	6.90529	4.77052	1.06322e-08	1.94997e-06		TCCGGAGAGAGAGT	-8.49498	5.66863	4.47594e-06	0.000492022		AAATTTTTGGGCTGCAGCACCGGGGGATCCGGAGTTGCCG	-5.63472	5.05762	9.13041e-06	0.00129821		ATTACGTCCCTGCCCTTTGT	-9.31306	5.56176	4.35961e-07	5.93366e-05		CGAAGGCGATCA	7.70323	2.07633	6.75134e-09	1.01918e-06		GTCACTCACTTTGAGATCTAATTGAAG	7.08418	4.12907	1.9581e-05	0.0024287		TTTGTATTGCTGAATTTTTGCT	-5.23654
AGGGTTTCACGTCAA	-9.35918	4.22343	4.9642e-10	7.28012e-08		GAAGTTATGTTTTCACGGTTGAGAAGG	-8.84104	4.61786	7.72204e-07	9.86017e-05		GCGAAAGGG	9.13081	3.95032	1.06018e-08	1.94997e-06		TGTGTCTGATTTCTGCCCA	-6.28376	7.0938	4.51733e-06	0.000495044		GAGGTGAAATTCTTGGACCGTAGCG	5.17355	6.92823	9.19701e-06	0.00130119		AAAGATCAGAGTCGTGTTTATG	10.6116	6.76696	4.41253e-07	5.9773e-05		AGCGGAGGAA	5.92396	1.97533	6.79262e-09	1.02226e-06		TGAGATCAATGGGAATCTTCAA	4.0525	6.65274	1.96537e-05	0.00243022		ACATTATGTCGATACAACTTGAACTGAGCT	-5.42791
CTGGGGCGGTACA	-9.31942	4.186	5.02669e-10	7.34915e-08		TTTGCGACATACTTAGATCAG	5.73895	2.63617	7.75492e-07	9.86017e-05		GAAAGTCTTTCGGTTCCGGG	6.86557	6.19082	1.09081e-08	1.99444e-06		TCCTGGGAACCGTTAGT	-5.81736	6.64419	4.54113e-06	0.000496125		TTTGCGACCAAATCCAGGCCACG	-5.60069	12.6207	9.20785e-06	0.00130119		TCCCTGAGATTTCGTATAACCGGA	8.5474	4.74255	4.4205e-07	5.9773e-05		TTGGATGGGAGACCTCCTGGGAACC	5.84665	1.90175	7.08682e-09	1.06001e-06		GACTTTATCCAGAATCGCTTTTAGGACT	4.4915	4.949	2.03316e-05	0.00250634		GATGGTTGGAAACTCTTTATTATAAAA	-9.06353
CCTCCTGGGAACC	-9.12886	4.00968	5.10956e-10	7.44746e-08		GAACATGTCAACTAAATATGAACG	-8.96973	4.73869	7.81403e-07	9.90494e-05		TGTTTGAACCGGG	7.05629	4.05057	1.09442e-08	1.99492e-06		TTGCGACCTATTCATGATCAA	8.63639	5.70328	4.57881e-06	0.000497744		GCGTAGGTTCG	8.78365	5.75253	9.31501e-06	0.0013083		TTTGCGACCTATATCCAGGCCA	8.6102	4.80276	4.57365e-07	6.16548e-05		TTAGTAAGATTCATTGAATACC	7.78372	2.16315	7.08077e-09	1.06001e-06		TAAGGCACAATATTGGCATCTC	-3.35738	6.59375	2.04024e-05	0.00250737		TATAATGAAGAATTATCGGTTTTACCCCTGATA	-9.06353
GAGCAATATCATTTCTGTAGGAGGCT	10.6093	6.00131	5.15761e-10	7.49458e-08		TTTGCGACCAAACCTAGATCA	5.10057	3.46727	7.93322e-07	9.9949e-05		GTAACTGCTAGATATCATTGGTTGA	-10.003	5.29381	1.10216e-08	1.99874e-06		GGTTCCGGGGG	-6.58376	6.52127	4.5839e-06	0.000497744		GCCCTTAGATGTCCG	5.37613	6.57772	9.29032e-06	0.0013083		GAAAAACAACAAACTAATTAAAGG	8.54731	4.74248	4.61495e-07	6.20219e-05		GGCACGGACA	5.31119	4.58324	7.23316e-09	1.0786e-06		AAAAACATTTTCAGTAGTCAAA	7.07771	4.12478	2.10114e-05	0.00257434		TTTGTAATTGGAAGAAAAGAAA	-9.06353
AGCTCGTAGTTGGA	-7.76516	4.45429	5.23756e-10	7.58762e-08		TCCCTGAGATTTCTTATAACCGG	5.6123	2.53106	7.93148e-07	9.9949e-05		GAAAGTCTTTCGGTTCCGGGGGAA	8.93288	3.77059	1.10322e-08	1.99874e-06		GGTGAATTTAGGGACAGGTCTTCTAAACTTGTTTTGAGCTAGT	6.74225	5.77646	4.64457e-06	0.000501377		GACCGTAGCGAGACG	5.82794	7.01912	9.38244e-06	0.00131331		TCGGAAACGAAAGTCTTTCGGTTCCGGGGGAA	-8.51652	4.84046	4.71871e-07	6.32236e-05		TATTGGTTAATGATAAATTGA	8.10529	2.44809	7.3086e-09	1.08654e-06		AATAAGATAGGATAAAAAGTCTATTGGGTTC	-7.7187	4.45271	2.11595e-05	0.00258462		GAGGCACTGGTATCTTCGGATGCGAGGGTTCGAATCCCTCTCTCGTCACCA	-6.60906
AAAGGGTTTCACGTCA	-8.2824	7.63963	5.28714e-10	7.63624e-08		AAAGGGTTTCACGTC	5.31628	2.29472	7.98712e-07	0.000100323		GAATTTGTTGAAGCTCCTTGAAACA	-9.71097	5.00589	1.13192e-08	2.0322e-06		CGTAGCGAGACGTCC	-5.63795	7.37914	4.64846e-06	0.000501377		GAGAGGAACCGT	5.33839	7.47577	9.40812e-06	0.00131331		GATTTATTTATTTTGTTAGTTGGGTT	8.63055	4.8223	4.89756e-07	6.54211e-05		GTGTGTTTGG	5.20677	1.97147	7.33143e-09	1.08663e-06		CGGATATAGAAGATATGGCGAA	7.21474	4.23778	2.13051e-05	0.00259451		GATCGGCCAATCTTTGAATACTATGAT	-7.3817
GAATCCGACTGTCTAA	-9.66005	4.51355	5.32002e-10	7.66051e-08		GGGTTATTTTAAAACTTAGATTTGAAAA	5.21572	4.18789	8.01984e-07	0.00010043		GTCTAACTCGTTGAAATTCTGCT	-9.67005	4.96595	1.12817e-08	2.0322e-06		CTCCGGAGAGGG	-6.58121	6.50609	4.65959e-06	0.000501377		TGGCGACGTGG	5.16127	6.91699	9.4647e-06	0.00131331		GTATCCAATAGCTTTCGTTGTTT	8.61016	4.80272	4.99286e-07	6.64925e-05		TCCGTCGGAGTCGGCTTT	5.84072	1.87318	7.49506e-09	1.10419e-06		ATAAAATCGTGTCGG	-3.9615	4.86672	2.13918e-05	0.00259719		ATAGGAAATGAATCAGGAGAGA	-5.31384
TTGGATGGGAGACCTCCTGGG	-9.07764	3.96117	5.47757e-10	7.86361e-08		GTACTTCAGAGTGTTTCTCGTCCGAA	-8.82405	4.60218	8.07305e-07	0.000100489		GCCCTTAGATGTCCG	6.74498	4.61308	1.13167e-08	2.0322e-06		TTAGGGTTCGACTCCGGAG	-5.6086	8.12381	4.70413e-06	0.000504646		TTAAATGAAGACAACCGCTAACCTGAGTC	-8.72423	5.50165	9.45456e-06	0.00131331		TTAAAGCTTAGATTAAACGT	6.50834	4.73302	5.02595e-07	6.67315e-05		CATAAACACCACTCTGATCTAC	8.11399	2.47182	7.48711e-09	1.10419e-06		GAGTTAAAATCACTTATTGGGTTTCGG	7.13304	4.17036	2.15043e-05	0.00260299		CGAATCTCGTCCCAAACGTACCTTTT	-9.01003
GGACGTGAAACCG	-9.19136	4.06602	5.54906e-10	7.94233e-08		TGAGATCATGTTAAACTCATAT	5.47106	2.38546	8.04888e-07	0.000100489		GTAGATGTCGTCCTTTATAGCAAT	-9.73254	5.02782	1.1487e-08	2.0524e-06		GGTGAATTTAGGGACAGGTCTTCTAAACTTGTA	8.43728	5.51486	4.79822e-06	0.000511657		TGGCAGTGCGGTTAGCTGGTTG	-5.00282	5.83344	9.63628e-06	0.00133311		GAAAGTCTTTCGGTTCCGGGGGAAGTATG	-6.8024	5.77262	5.33042e-07	7.05617e-05		ACTATGACTCTCT	5.35324	3.72985	7.54546e-09	1.10828e-06		TGCTATGATAGATTTGTTATCCCTGTCTGAAC	3.94395	5.84958	2.16237e-05	0.00260959		TTTGTAATTGGAAGAAAAGAA	-9.27936
GGTTCGACTCCGGAGA	-9.13525	4.01365	5.84237e-10	8.32362e-08		GACCATTTGATCGAATTTCTTACATT	-8.81575	4.59466	8.2598e-07	0.000102506		GAAACTTTTGAAGATTGTTGGTTACT	-9.64287	4.93946	1.15006e-08	2.0524e-06		TTCGGTTCCGGGGAAAGT	-8.44673	5.62501	4.79336e-06	0.000511657		AGCTGGTTTGCTTAAATAAAAGCTCCTGACTTTTAATCGGGTGATGGGTTTCCCACTGGCTACCA	-5.71867	5.09804	9.70813e-06	0.00133902		TACCCGTAATCCAATGCTGCAA	4.70898	8.68914	5.38681e-07	7.09665e-05		TTTGCGACTGTATCCAAAAC	4.59421	6.57103	7.80222e-09	1.13576e-06		GGAGGTTTCTGACCCTTCTGAGTTTGATAATGG	-5.17572	4.07057	2.16933e-05	0.00261014		TATGGCACGTACACCATCTTCA	-6.32716
CCCGGGCCGGAC	-7.74694	4.43674	5.85039e-10	8.32362e-08		GTAACAATGGAGTCATCAGAAGCTG	-8.81989	4.59841	8.32084e-07	0.000102955		GAAAGTTTTTCATACTATCGTCCACG	-9.65473	4.95128	1.15393e-08	2.05317e-06		CCGCCCGTCGCTGCCCGGAACTGAGCA	-7.31898	7.20015	4.86508e-06	0.000517238		GTTTTCACCCACGCGGCCCGG	9.77896	6.66187	9.74142e-06	0.0013396		GAGAGGCCCCGG	-8.5249	4.85005	5.3932e-07	7.09665e-05		TCCCTGAGATTTCGTATAACCGG	5.15812	3.27308	7.78205e-09	1.13576e-06		GATTGTTGTTTGATTGATTGTTTGATT	7.15658	4.19047	2.23539e-05	0.00267395		GACTTCAATTGAAATTTTTGATCTTCC	-9.01049
ATTAGGGTTCGACTCCGGAGA	-9.33272	4.19836	5.89544e-10	8.36275e-08		TTTGCGTGTGGGAGGGATGCGTTCGCGCACTCTCCCGA	4.1861	4.92551	8.38038e-07	0.000103383		GATATTTAGTCTTTTTAGTTGGAGT	-9.7867	5.08115	1.17256e-08	2.0801e-06		TCTTGGACCGTAGC	-5.80113	7.14695	4.8805e-06	0.000517333		GATGCCCTTAGATGTCCGG	8.76486	5.73583	9.88114e-06	0.00135075		GAAATATATATATAGGT	8.54718	4.74238	5.49573e-07	7.21004e-05		TTTGCGACCAAACCTAGATCA	5.62983	3.16181	7.77752e-09	1.13576e-06		GATACATGACTTCGTCTTTTGGAACT	7.15658	4.19047	2.23566e-05	0.00267395		GAGTTTGACTGGG	9.42009
GTACTTCAGAGTGTTTCTCGTCCGA	10.5538	5.94677	5.9492e-10	8.41397e-08		TCCCTGAGATTTCGTATAACCGGA	5.22415	4.61321	8.53243e-07	0.000104946		GTTCCGGGG	6.48847	4.89838	1.17716e-08	2.08207e-06		TCACCGGGTGAACGAATTCT	-9.75252	6.8376	5.0511e-06	0.000533828		GAAAGGTTGG	6.09982	6.3891	9.85586e-06	0.00135075		TTTGCGACCTCTATCAGACC	5.45671	6.13109	5.535e-07	7.24001e-05		TGTAATTTTTTCATCTGTCTTT	7.45916	1.86377	7.99087e-09	1.15674e-06		GATCATCACTATCTGATTCGTTGACA	7.02644	4.08187	2.24672e-05	0.0026792		GATAGTAATATGGATACTTGTAATCGT	-7.14785
TACCCGTAGTCCACTGCTGTCA	-6.01107	7.30472	6.10568e-10	8.60973e-08		GGGCTTGATTGTCGTTTTGGTACAA	-8.97871	4.74509	8.6311e-07	0.000105846		GCAAAAGTTGTACCATGACGTTGAGG	-9.65288	4.94941	1.18077e-08	2.08227e-06		CGGTTCCGGGGGAAGT	-6.59286	8.58937	5.07311e-06	0.000534568		GCCCGGAACTGAGCAATATCG	6.14573	6.40475	1.0212e-05	0.00139186		GTATCCAATAGCTTTCGTTGTTTTA	8.52557	4.7217	5.58683e-07	7.26469e-05		TTTGCGACCCAATTCAGGCTAA	7.45916	1.86377	7.99367e-09	1.15674e-06		GTTATGACTGTATTCATATCTTTGTCC	7.03306	4.08627	2.31496e-05	0.00273621		AGACCTCCTGGGAACCG	9.89797
GCCCGTCGCTG	-6.9504	5.01736	6.49667e-10	9.13405e-08		CTCCGGAGAGAGA	6.868	2.18501	8.67411e-07	0.00010606		GATAACGAGCG	8.63288	3.50228	1.18853e-08	2.08978e-06		AAAGTCTTTCGGTTCCGGGGGAAGTA	-5.85874	6.68415	5.15058e-06	0.000536383		TACTCGTAGTCCAATGCTGTCA	-5.03167	6.23687	1.02583e-05	0.00139403		TTAAAGCTTAGATTAAACGTCT	6.3322	12.0613	5.58287e-07	7.26469e-05		TGCTATGATAGATTTGTTATCCCTGTCTGAAC	4.57878	4.56968	8.23412e-09	1.18802e-06		GACTTTATCCAGAATCGCTTTTAGGAC	7.03306	4.08627	2.31353e-05	0.00273621		TAACCGGATATATCTGACTACA	-5.53158
AAATTCTTGGACCGTAGCGAGACGTCC	-9.07689	3.95934	6.71794e-10	9.38975e-08		AGTAGTAGAGC	6.93924	2.24104	8.82709e-07	0.000106983		GTTTCTGTGTATTCTGGATATGACACA	-9.64189	4.93871	1.20823e-08	2.11767e-06		CGGGTTCGATTCCCGATAAACGCACCA	-7.15444	7.04759	5.13738e-06	0.000536383		GAGAGGAACC	5.69925	7.42143	1.03326e-05	0.00140001		ATCGGAATCGCCA	-5.43983	8.13019	5.6223e-07	7.28932e-05		CATCATTTTATGATTGCGTTA	7.54577	1.94448	8.32994e-09	1.19831e-06		AGCTGGTTTGCTTAAATAAAAGCTCCTGACTTTTAATCGGGTGATGGGTTTCCCACTGGCTACCA	-4.60149	4.32748	2.31491e-05	0.00273621		TCTGGGATTGTTTATCTTGGTA	-6.60327
TTACGTCCCTGCCCTTTG	-7.68265	4.43086	6.71117e-10	9.38975e-08		TTGGAATGAAGCTCGAAATAGCTTCTAA	6.93924	2.24104	8.82472e-07	0.000106983		ATAAAGTAGATTCAAACTGGTGCATAT	-9.63538	4.93204	1.22216e-08	2.11767e-06		CGGTTCCGGGGGAAGTATGGTTGC	-8.39418	5.57732	5.13551e-06	0.000536383		TGCCCACTGTTAATCCCCGGGTATCCATCCTTCAAATGTGGTCTCGGTTTCGTAAGATGGGTA	-8.29085	5.06889	1.05537e-05	0.00142577		TTTGGGAACATGTTCAGAACCTT	5.69947	5.61675	5.72701e-07	7.29631e-05		GTCGCGATGGCCGAGCGGTCTAAGGC	-6.98383	6.40647	8.45403e-09	1.2126e-06		GATTTGATTTGGTATTGGTAGGGCCT	7.01315	4.07307	2.36392e-05	0.00277775		CGAATCCCACTCTCGTCAACAATTCTTT	-9.01073
CGCGCCTGTCACG	-9.0356	3.9225	6.78711e-10	9.45869e-08		GGTGAATTTAGGGACAGGTCTTCAA	7.44267	2.66335	8.82563e-07	0.000106983		GGAAATCGATGTAGCATTTTTGAGGCT	-7.69766	4.94955	1.21719e-08	2.11767e-06		AGGGCGGTGGCC	-8.39418	5.57732	5.13488e-06	0.000536383		GAACGTGAGCTGG	4.91964	7.06709	1.07897e-05	0.00144916		CTTTCGGTTCCGGGG	-5.90331	6.28382	5.66519e-07	7.29631e-05		CATTATGTCGATACAACTTGAACTGAGCT	4.28252	5.45136	9.26322e-09	1.32478e-06		TCCCATGTGGTCTA	-4.11573	5.57776	2.36134e-05	0.00277775		CACTTCGTCCTGAAAAGACAGG	-9.01073
CCGCCCGTCGCTGCCCGGAACTG	-9.67368	4.52129	6.91902e-10	9.61441e-08		TGACAGTGTGGTTAGCTGGTTG	5.67696	2.58448	8.89485e-07	0.00010749		GAAAGTCTTTCGGTTCCG	6.5354	6.28757	1.21945e-08	2.11767e-06		CCGGTTGAGCCCCCA	-5.35479	7.40848	5.19388e-06	0.000539316		TTTGGCACTTAGGAATTCCACT	-5.0036	6.50448	1.07626e-05	0.00144916		AGTCTTTCGGTTCCGGGGGAAGT	-6.34885	7.09024	5.72113e-07	7.29631e-05		CCCGGGCC	5.95162	2.66917	9.91734e-09	1.41419e-06		GTCTTACGCTCATATCCT	-4.34406	4.93949	2.40946e-05	0.00281709		GACAAAGATTTGTTGAAGATTGAACTT	-9.01073
AAAGTCTTTCGGTTCCGGGGGAAGT	-11.649	6.45136	6.99193e-10	9.68748e-08		GTCCACTTGAGAGAACTTATTTTTGAT	-5.71397	5.33052	9.02464e-07	0.000108742		GACTGTGTCT	8.83686	3.68414	1.21986e-08	2.11767e-06		TTTTGTATTGCTGAATTTTTGCT	5.63058	8.83789	5.21537e-06	0.000539973		AATGGCACCTTTGCACGTGTGCG	-4.61145	6.62633	1.08474e-05	0.00145266		GTTCCGGGGGAAGTA	-8.48018	4.80789	5.72563e-07	7.29631e-05		TACACAGATGATGTTTTGGAT	7.43738	1.8476	1.00228e-08	1.42094e-06		GGTGAATTTAGGGACAGGTCTTCTAAACTTGTTA	-7.05247	3.88725	2.41142e-05	0.00281709		GAACGTAACTATGGTCAATCTCTGGAT	-9.03748
GCCCTTAGATGTCCGG	-9.228	6.73166	7.01905e-10	9.69687e-08		GGAGGAACATGAAACATTGATGGAGAT	-8.92861	4.6985	9.13385e-07	0.000109442		GCATTGAAGGAGCATTATCGTTAGA	-9.70389	4.99971	1.22762e-08	2.12097e-06		CGAGAGGCAGGAAGAG	-5.66369	7.02734	5.28974e-06	0.000546085		AGAGGCAGGAAG	6.06481	6.35664	1.09422e-05	0.00145689		ATACCCGCTGAACTT	-8.48531	4.81115	5.69026e-07	7.29631e-05		TTTGCGACCGAATTCAGGCC	7.43738	1.8476	1.00173e-08	1.42094e-06		TTGCGACCAAACTTAGATC	7.12908	4.15892	2.42917e-05	0.00282489		GATCACAGATTTCTTTGCATTTATCGTT	-9.03748
GCCCTTAGATGTCC	-9.00202	3.89062	7.08315e-10	9.75714e-08		GCTTCTTCTTGCTCGTCTGTAAAT	-8.89134	4.66562	9.13553e-07	0.000109442		GGCAATTCTTGAACAAGTGTATCTACT	-9.64187	4.93838	1.24684e-08	2.13919e-06		TGGCAGTGCGGTTAGCTGGTTG	8.41248	5.49136	5.40015e-06	0.000555527		TTTGCGACCTATCCAAGATCA	-5.45847	6.10267	1.09351e-05	0.00145689		GGTGAAATTCTTGGACCGTAGCGAGACGTCCTACTGCGAA	-9.35597	5.61629	5.72406e-07	7.29631e-05		CGGTTCCGGG	5.69994	1.78003	1.01984e-08	1.44166e-06		ATCAGAGTTGTGTTTATGGG	7.04581	4.09918	2.44515e-05	0.00282489		ATCATTTTATGATTGCGTTATA	-9.03748
GAGCTATGATGTAACTATAATGAGCCTGATCTATTTGATGTGAACTCCGCTTCTGAGCTCT	6.90899	10.3069	7.10688e-10	9.76161e-08		GGGGATATAGCTCAGCGGTAGAGCATG	-5.66797	7.30217	9.32175e-07	0.000111351		TTCGGTTCCG	8.87264	3.71629	1.24893e-08	2.13919e-06		CGGATCCCGTCC	-6.05041	6.86423	5.4124e-06	0.000555527		ACG	-5.59697	5.02064	1.10047e-05	0.00146099		TCCGATGTGGTCTAGTGGTTAGGATTTGTGGCTC	6.24017	5.2432	5.78112e-07	7.31806e-05		TTTGCGACCAAACTTAGAT	4.40383	4.76076	1.02792e-08	1.44642e-06		GTTCGGAATTGGCATTTGTGAAGTGAT	7.04581	4.09918	2.44622e-05	0.00282489		GATAT	-4.75593
CGAAAGTCTTTCGGTTCCGGGGGAAGT	-7.65565	4.4054	7.42217e-10	1.01654e-07		TTTGCGACCGAATTCAGGCCACG	5.24347	7.7674	9.35739e-07	0.000111455		CCGCCCGTCGCTGCCCGGAACT	9.08558	3.90908	1.24245e-08	2.13919e-06		TTTGGCACCATGGGACTCTA	6.58208	5.62596	5.55044e-06	0.000563925		GAAAGTCTTTCGGTTCCGGGGG	4.84999	7.55106	1.11605e-05	0.00146189		TCGATTCCCGGTCAACGCAC	5.85496	5.85922	5.78316e-07	7.31806e-05		AATGGCACCTTTGCACGTGTGCG	6.06205	2.10214	1.02912e-08	1.44642e-06		GGAAGTCGGAACCC	5.21634	4.77922	2.43237e-05	0.00282489		AGAAAGATCAGAGTCGTGTTTA	-6.32653
TTCTTGGACCGTAGCG	-7.52216	5.05369	7.44644e-10	1.01694e-07		TGGCGGTGTGATTAGCTGGTTG	4.89301	3.35763	9.41952e-07	0.000111874		TCCTGGGAACCG	8.89861	3.73968	1.25624e-08	2.14554e-06		GCCTCCGTGG	-5.74432	6.5772	5.52069e-06	0.000563925		AATGGCACCTTTGAACGTGTGCG	-4.15895	12.3856	1.10687e-05	0.00146189		AAGAACTGGCACGGACAAGAGGA	-8.57708	4.89124	5.79389e-07	7.31806e-05		TCGAGTCCCATCGGAATCGTTGACCTTT	5.34936	3.25873	1.04601e-08	1.46594e-06		GGGGCG	4.35067	5.32022	2.47629e-05	0.00285143		TTTGCGACTGGATCCAGG	-6.43605
CGAGAGGCAGGAAGAGATACA	-8.99553	3.88431	7.47568e-10	1.01802e-07		TACCCGTAGTACAATGCTGTC	5.16215	2.15146	9.555e-07	0.000113158		GCAGGCGCG	6.47782	5.77721	1.26992e-08	2.16271e-06		AGACCTCCTGGGAACC	-6.23468	7.0239	5.53184e-06	0.000563925		TTGTAATTTTTGGAGGCTCTCCTTCGGGGGAGCGAT	-4.75323	6.46402	1.11097e-05	0.00146189		ACACCGCCCGTCGCTGCCC	-5.85765	6.91933	5.84868e-07	7.36228e-05		TGTGTTTGGT	5.7357	1.78303	1.05642e-08	1.47631e-06		GTTGTACTAGAACTAATACTCGTTGTT	7.06452	4.11619	2.67309e-05	0.0030621		GCTCGATCGCATCTTATTGTTTCTGGT	-8.98323
GTTCCGGGGGA	-7.72904	4.47669	7.63512e-10	1.03677e-07		TGAGATCAATGGGAATCTTCAAA	-5.5086	6.05169	9.652e-07	0.000113982		GAAGTTATGTTTTCACGGTTGAGAAGG	-9.63318	4.92982	1.29013e-08	2.18465e-06		GACCTCCTGGGAAC	-8.3883	5.5727	5.55755e-06	0.000563925		CAGTCCGA	-6.63448	5.22618	1.11701e-05	0.00146189		CACCGCCCGTCGCTGCCCGGAACT	-6.33352	7.07415	5.8623e-07	7.36228e-05		TGATATGTCTGGTCTTCTTGG	7.49268	1.89679	1.07087e-08	1.49223e-06		GGGCTTGATTGTCGTTTTGGTACAAA	7.06452	4.11619	2.67449e-05	0.0030621		ATCTTTGTAGATGTATTTTAA	-9.18758
CAGCGGGGAAAGA	-7.69053	4.44409	7.72065e-10	1.0454e-07		GAGGACAATATTTTTTTGTGTGAGC	-8.81711	4.59602	9.72049e-07	0.000114464		ATGGGCCTATTTGTATCTCGTG	-8.70856	8.16746	1.28805e-08	2.18465e-06		GGTGAAATTCTTGGACCGTAGCGAGAC	-5.80063	7.52704	5.67891e-06	0.000574602		ATATAGGTTGGAGAAT	-8.46799	5.2462	1.11634e-05	0.00146189		TCTTGGACCGTAGCGAGACGTCCTACT	-5.19647	6.93366	5.90258e-07	7.39181e-05		CCGGAGAGA	5.46931	2.70807	1.07458e-08	1.49314e-06		GTTAAAAATTGGTAGTAACTCTATATT	7.03917	4.09483	2.68578e-05	0.00306629		TGAAAGACATGGGCAGTGAGACG	-6.13922
TAGATGTCCGGGGCTGCACGCG	-9.04662	3.93093	7.83587e-10	1.05477e-07		GAAAACATATATCCTTCCTCGGACG	-8.78098	4.56262	9.7801e-07	0.00011484		GACCGTAGCGAGACGTCCT	6.6892	4.56101	1.31938e-08	2.22784e-06		AGGACGTGAAACC	-5.00376	8.28931	5.72644e-06	0.000576643		TTGCGACCTATTCATGATCAA	-5.68273	6.01228	1.12238e-05	0.00146476		CGGGCTTATCTTTT	6.57312	4.79359	5.95174e-07	7.43226e-05		GTGAGTTAGTCGGT	5.36486	3.52699	1.07868e-08	1.4946e-06		GAATTTTTTCGTTAGGCTAGCAATGTA	7.04636	4.09504	2.69431e-05	0.00306731		TTTGCGTACATATTTCTGAACC	-5.8815
GGTGAAATTCTTGGACCGTAGCGAGACGT	-8.28702	5.01432	7.85622e-10	1.05477e-07		TGGCAGTGTGATTAACTGGTTG	7.18927	2.44018	9.83384e-07	0.000114941		GACCATTTGATCGAATTTCTTACATT	-9.60673	4.90415	1.32576e-08	2.23141e-06		TACCGCCCTAGTTCT	-8.38639	5.56934	5.73146e-06	0.000576643		AGGTCGATGAAGAGC	8.99876	5.94454	1.13081e-05	0.00147159		GAACGTGAGCTGGGT	-8.47033	4.79794	5.98865e-07	7.45722e-05		CCTGGGAACC	5.47863	2.27242	1.0836e-08	1.49718e-06		GATATTCAGCAAATGTAGACTTTTGTA	7.09157	4.12947	2.7209e-05	0.00307384		GGCTAACACGGACAACTCATCTACTAC	-8.98299
GTGTAGGCTGGC	-7.95065	4.69571	7.81523e-10	1.05477e-07		TAGCAGTGTAGTTAGCTGGTTG	7.18927	2.44018	9.85188e-07	0.000114941		CCTGCGAAAGGATCATT	-6.95618	6.63624	1.32898e-08	2.23141e-06		CTGAATGCACCGGATCCCGTCC	-8.39912	5.58027	5.82714e-06	0.000584618		GAGACCTCCTGGGAAC	5.49083	6.68238	1.13851e-05	0.00147596		TGGCAGTGTGATTGGCTGGTTG	6.44126	4.66972	6.02585e-07	7.4824e-05		ATCAGAGTCGTGTTTATGGGTA	7.39416	1.80776	1.09119e-08	1.50342e-06		TAACTTACTGTGGAAATTGGT	6.98648	4.0509	2.72232e-05	0.00307384		GAGCCTGAGAAACGG	9.37359
GGGGCTGCACGCGCGCT	-7.64327	5.68199	7.95246e-10	1.06469e-07		AACAGCTCACTCAACTGCCATG	8.62825	3.73806	9.87187e-07	0.000114941		TTCATTGTCCAGCGTTGAAACGA	-9.60197	4.89957	1.33752e-08	2.23945e-06		GATTACGTCCCTGCCCTTTGTA	-5.72575	7.4623	5.95543e-06	0.000595811		ATAGGTTGGAG	-5.67343	5.05481	1.14058e-05	0.00147596		GTTCCTATGTAGAACACATATTCTCGT	8.52552	4.72166	6.06028e-07	7.50403e-05		AGAAAGATCAGAGTTGTGTTT	7.39416	1.80776	1.09621e-08	1.50608e-06		GGGCTTGATTGTCGTTTTTGTACAAA	6.98648	4.0509	2.72298e-05	0.00307384		GATTTTCTTCGACGTACACTTCCGTAG	-8.9837
TGGATGGGAGACCTCCTGGGAACCGTTAGTGGC	-9.0109	3.89966	8.16357e-10	1.08872e-07		GTCGAATTAGATTATTTCAGTAGGATTATTTCGATA	-9.68404	5.41433	1.00887e-06	0.0001152		GAACATGTCAACTAAATATGAACG	-9.75617	5.05126	1.35231e-08	2.24531e-06		AGGGTTTCACGTCA	-4.78848	10.7431	6.06983e-06	0.000605555		GAGCCTGAGAAACGG	6.02434	6.3199	1.1688e-05	0.00150824		TTCGGTTCCGGGGGAAGTATGGTTGCAA	-8.53051	4.85013	6.07937e-07	7.50657e-05		CGTGTCGGTG	5.07577	1.86543	1.10175e-08	1.50946e-06		TATTTATCAATAACTTACTGTG	6.9797	4.04643	2.79967e-05	0.00315155		GTCTAATTGTGATTGTTAATTGTTTCTT	-9.03771
GTCTTTCGGTTCCGGGGGAAG	-8.98901	3.87796	8.17762e-10	1.08872e-07		GGACAAATATCTGATAAGTTGAACT	-8.85055	4.62767	1.008e-06	0.0001152		GATAAATAGTCTTTTGGATCGTCAGGT	-9.69381	4.98884	1.34596e-08	2.24531e-06		TGGACCGTAGCGAAAC	-8.34495	5.53338	6.09862e-06	0.000606727		GACTCCGGAGAGGG	8.7125	5.68927	1.18304e-05	0.00151838		TTCAAAAACATTTTCAGTAGTC	8.58939	4.78281	6.21397e-07	7.58775e-05		TTTCGGATATACAGAATATGGC	7.73161	2.11689	1.10642e-08	1.51162e-06		GCTAAGTATTTAATTGTTGTTGTTGTT	7.09589	4.14142	2.8366e-05	0.0031842		TGGCACGTATATCGTTATC	-6.32505
GGAATTTTGAGAGATGTTTAAGG	10.4496	5.84434	8.55033e-10	1.13517e-07		GATGTTTTTTCCATATTGCGCGAT	-8.80822	4.58769	9.93975e-07	0.0001152		GTACTTCAGAGTGTTTCTCGTCCGAA	-9.61581	4.91289	1.35233e-08	2.24531e-06		GGCAGTGTAGTTAGCTGGTTG	8.59291	5.66171	6.20247e-06	0.000607918		GAACGGGCTTGG	5.33334	6.53839	1.18333e-05	0.00151838		ATTCTTGGACCGTAGCGAGACGTCC	-5.4595	6.24578	6.18041e-07	7.58775e-05		ATAGGGGCG	7.40164	1.81324	1.11341e-08	1.51284e-06		CAGTAATTAGTTTAATAAAAATATAGCATTTGGA	-7.80203	4.52597	2.94306e-05	0.0032945		TTTGCGACCAAACCTAGATCA	-7.37374
GAAGAATAATCTGTGAAAGTCAAAG	10.4697	5.8642	8.62777e-10	1.14227e-07		ATATATAAAGTAGATTCAAACTGGTGC	-8.7921	4.57297	1.0041e-06	0.0001152		GCGCAAAGTTGGT	6.91592	4.78955	1.35627e-08	2.2456e-06		GGTGAATTTAGGGACAGGTCTTCTAAACTTGT	5.43727	6.54519	6.20299e-06	0.000607918		GTTAGTGGCG	4.73666	7.66368	1.18655e-05	0.00151838		GATACCGCCCTAGTTCTAACC	-8.48244	4.80784	6.18645e-07	7.58775e-05		TGCACCGGAT	7.40164	1.81324	1.1135e-08	1.51284e-06		GTTGTTTGAACCGGGCA	4.04219	5.40293	3.00288e-05	0.00334681		ATATATATAGGTTGGAGA	-8.98275
GAAAGTCTTTCGGTTCCGGGGGAAGTATGGTTGCA	-7.3921	4.9403	8.69864e-10	1.14846e-07		TTCCA	4.58212	4.20501	1.0064e-06	0.0001152		CCGCCCGTCGCTGCCC	7.00953	4.06013	1.36572e-08	2.25498e-06		GGTTTCACGTCA	-4.93107	8.92485	6.20195e-06	0.000607918		TAACCTGTCACTCGATGCTTAT	-8.32226	5.10119	1.20832e-05	0.00154196		TTGACGGAAGGGCACCACCAGG	-8.68633	4.98791	6.20846e-07	7.58775e-05		CTT	4.98475	1.81772	1.12447e-08	1.51931e-06		TTTTGGCACTTAGGAATTCC	-6.99783	3.84096	3.00644e-05	0.00334681		GCTAGCTGGACCAG	9.37248
GAAATCTTAACTATATCAGAGGCTG	10.4968	5.89065	8.80535e-10	1.15934e-07		CGGCAGTGTGATTAGCTGGTTG	5.09077	3.13659	1.00099e-06	0.0001152		ACCAGGAGTGG	7.19205	4.23697	1.39059e-08	2.28972e-06		GGCTGTCGCGGGTTCG	-5.69479	6.53084	6.15423e-06	0.000607918		GGTGAATTTAGGGACAGGTCTTCTAAACTTGTTTAA	-8.25424	5.03209	1.21396e-05	0.00154488		GTAAAACTCGTTGATGCTTTGCTCTA	8.45874	4.65789	6.29377e-07	7.66397e-05		GGCTGGCGTAGT	4.98528	1.81748	1.12384e-08	1.51931e-06		GTCAAATGCAGGATGAGCTCGTAGACT	7.03243	4.09047	3.05188e-05	0.00338801		TAAAATCGTG	-5.04259
GCAGATTGTTGATTCCTTGGTGCTT	10.5004	5.89432	8.85789e-10	1.16304e-07		CGGCAGTGTAGTTAGCTGGTTG	5.59819	3.15703	9.97669e-07	0.0001152		GTAACAATGGAGTCATCAGAAGCTG	-9.61268	4.90987	1.43395e-08	2.3546e-06		GAAAGTCTTTCGGTTCCGGG	-5.84753	8.67356	6.15858e-06	0.000607918		TAATTTTTTGTTATA	-5.55359	4.97889	1.21882e-05	0.00154679		TACGTCCCTGCCCT	-6.62848	5.60788	6.39804e-07	7.76948e-05		GGGAAGTCGGCA	5.86609	2.63193	1.16254e-08	1.56641e-06		TGGCAGTGTGGTTAGCTGGCTG	-5.05183	4.71247	3.07435e-05	0.00340355		GTAATATTCGGAAAGCGTTTTTTAAA	-7.12149
GGCGGGGAGTTT	-6.97118	4.93676	8.90136e-10	1.16554e-07		GAACTGCAGATCATATGGGACTTGATG	-8.76774	4.54996	1.01608e-06	0.000115705		AAGAAGACCCTGTTG	8.85428	3.6998	1.44298e-08	2.36292e-06		GCCGTTGGGCTTTGCCCGCGCGAGTTCG	-8.37262	5.55663	6.213e-06	0.000607918		TGAACCGGGCAA	6.02232	6.31822	1.22883e-05	0.00155522		TACCGCCCTAGTTCT	-8.44814	4.77785	6.49871e-07	7.87004e-05		AGGGGAT	5.71501	1.79074	1.17603e-08	1.58024e-06		GGGCGGT	3.95498	5.57989	3.128e-05	0.00344397		GGATCTATTTTCTCGATCAGAAGGCT	-8.9564
TTTCGGTTCCGGGGGAAGTATGGTTGCA	-8.99714	3.88507	8.98176e-10	1.17285e-07		GATAAGTTGCATTCGTTGACTATATGA	-8.93732	4.70757	1.04637e-06	0.000118828		GAATAGTCTGGGTATGAAACTGGTG	-9.72018	5.01455	1.46277e-08	2.36929e-06		GGTGAATTTAGGGACAGGTCTTA	8.36155	5.4432	6.30375e-06	0.000613171		AGCGCAAAGTTGGT	6.04755	6.34088	1.23285e-05	0.00155602		AGGTTGGAGAATGAAAA	6.41823	4.64808	6.59695e-07	7.96713e-05		TTTTGTTGGTATCC	5.8631	1.92325	1.19297e-08	1.59862e-06		TGGCAGTGTGGTTAACTGGTTG	-5.00162	3.92964	3.12143e-05	0.00344397		TAAAATCGT	-5.46701
AGGGCACCACCAGGAGTGGAGCCTGCGGC	-9.12532	4.00373	9.088e-10	1.18348e-07		GTTCTTGAAGTTCATTTTTGCGGATA	-8.90231	4.67508	1.05317e-06	0.000119273		TGGCTTGGATCTATCTGCAAAC	-6.33147	6.87647	1.46016e-08	2.36929e-06		TTTGCGTACATATTTCTGAACCTC	5.45918	8.8203	6.29484e-06	0.000613171		GATATGATTTGTCTG	8.68034	5.66133	1.23872e-05	0.00155652		GATGTTTGAATTTGTGTTGTTTCTGTT	8.5684	4.7627	6.61665e-07	7.96909e-05		TGCTATGGCAAGTC	5.02352	1.85141	1.24716e-08	1.66309e-06		GTATCCAATAGCTTTCGTTGTTTTA	5.10545	4.6894	3.26764e-05	0.00358789		ATGGGCCTATTTGTATCTCGTG	-5.60914
CGCCCGTCGCTGCCCGGA	-9.22726	4.0989	9.25726e-10	1.20184e-07		GACTATTATTCATTCATTGTATCGACT	-6.28864	5.02155	1.06102e-06	0.000119835		AGAGGCAGGAAG	6.60335	4.3829	1.45731e-08	2.36929e-06		GAGCTATGATGTAACTATAATGAGCCTGATCTATTTGATGTGAACTCCGCTTCTGAGCTCT	4.93937	9.62394	6.34746e-06	0.000613171		CCTGGGAACCG	5.34726	6.55163	1.24e-05	0.00155652		TTTGAAACTTCATCTTTGTAGA	8.45901	4.65811	6.63923e-07	7.97449e-05		CGAATCCTGCCAGGATCGTTAGCTTTT	7.31929	1.74435	1.24789e-08	1.66309e-06		GCATTGGATTTGGAAGTTTGTAAATC	6.95232	4.02378	3.31978e-05	0.0036352		CAAATCCCACTTCCGTCAAACTTTT	-9.13962
TGGACCGTAGCGAGACGTC	-9.18363	4.05807	9.27942e-10	1.20184e-07		GGGGATATAGCCCAGTGGTAGAGCATG	-9.60088	5.33176	1.07947e-06	0.000121587		CGAGAGGCAGG	9.07796	3.90214	1.46186e-08	2.36929e-06		CTCCGGAGAGAG	-4.72118	9.39846	6.35116e-06	0.000613171		TGATGCCCTTAGATGTCCG	8.70819	5.68533	1.24801e-05	0.00155809		ATAGGTTGGAG	6.04138	5.10861	6.75999e-07	8.08649e-05		TGAAAGACATGGGCAGTGAGACG	4.07301	7.19222	1.26847e-08	1.68593e-06		ATTAAACAGTTAAATTGCTCTGGAAATG	6.94542	4.01925	3.3554e-05	0.00365574		CTGGGAACCGTT	9.49362
TTGGATGGGAGACCTCCTGGGA	-8.92008	3.81458	9.31909e-10	1.20205e-07		GATTCCG	4.54935	4.04976	1.08372e-06	0.000121735		GTTAAGCGGAGGAA	6.57121	4.45662	1.48702e-08	2.40204e-06		TGCACGCGCGCT	-8.50195	5.67592	6.35276e-06	0.000613171		GCCCGTCGC	5.18027	6.93513	1.24507e-05	0.00155809		TAAATATGAATGTGAATGTTAT	5.02452	7.80619	6.76917e-07	8.08649e-05		GACTGTCT	5.91567	1.96993	1.29973e-08	1.7228e-06		AAGAACTGCCTTATGAACTTT	6.94542	4.01925	3.35673e-05	0.00365574		TTTGCGACTGTATCCAAAACCCGT	-5.88637
AACGGCGGGAGTA	-6.46721	5.8038	9.33153e-10	1.20205e-07		GTTTAAGATAACGAAGGAAACAAGG	-8.75127	4.53494	1.10483e-06	0.000123771		ATGGGCCTATGTGCGTCTCGTG	-9.58218	4.88033	1.49153e-08	2.40241e-06		AAACGGGGGCATTCGTATCGCTACGTTAGA	-8.37692	5.56031	6.4124e-06	0.000617254		AACGAAAGTCTTTCGGTTCCG	9.05074	5.99133	1.26912e-05	0.00158016		TTTGCGACTGTATCCAAAACC	6.99691	9.36602	6.87482e-07	8.18156e-05		CGATTCCCCATATCTCCAACATCCTTTT	5.9149	1.97016	1.30477e-08	1.72481e-06		GGAATTTTGAGAGATGTTTAAGGGCT	6.92434	4.00067	3.43587e-05	0.00372645		ATATAGGTTGG	-8.9276
CGAAGGCGATCAGATACCGCCCTAGTTCT	-8.92434	3.81827	9.44786e-10	1.21049e-07		GAAAGAACGAATGACCTTACAAGAACG	-8.75537	4.53907	1.11242e-06	0.000124286		GAAAACATATATCCTTCCTCGGACG	-9.56991	4.86831	1.49531e-08	2.40241e-06		TACGTCCCTGCCCT	-6.46904	6.40132	6.4958e-06	0.000623597		AGACCTCCTGG	6.04489	6.33845	1.27939e-05	0.00158865		TCCCATGTAGTCTAGTGGTTATGATTTGCGGCTCTC	4.97127	6.95815	6.90443e-07	8.18156e-05		TTTGAGACTAACGCTAGGGCTA	5.34041	3.50191	1.31898e-08	1.73889e-06		GTAGTTAGCTGGTTG	-7.00599	3.84588	3.4402e-05	0.00372645		TAAAGATGAAGTTTCGGATATA	-8.98441
GATGTCCGGGGCTGCACGCGCGCT	-6.50748	5.22367	9.44361e-10	1.21049e-07		GTAACAATGGAGTCGTCAGAAGCT	-8.72656	4.51235	1.12552e-06	0.00012541		GAATCCGACTGTCTAA	8.79045	3.64256	1.49987e-08	2.40325e-06		ACTCCGGAGAGAGA	-6.71376	6.62786	6.54833e-06	0.000626949		GGAACGGGCTT	8.68099	5.66212	1.31736e-05	0.0016314		CTCCGGAGAG	-4.67978	9.27864	6.89249e-07	8.18156e-05		AGCAGGGCGGT	5.68385	2.94617	1.32487e-08	1.74196e-06		GCGGGTTTAAGTTAAGTTTAAACTAGTGGTCTTC	-7.25729	4.05037	3.49428e-05	0.00377486		TCCCTGAGACTCTACTTGTGA	-4.74999
GTTGGATAGAATGTATGACTTCT	-8.92481	3.81938	9.66704e-10	1.23526e-07		GGCATTTTCAAAATATTTAGCATTGTC	-8.75916	4.54221	1.13919e-06	0.000125919		GAGGACAATATTTTTTTGTGTGAGC	-9.60377	4.90142	1.52373e-08	2.43494e-06		GGGTTATTTTAAAACTTAGATTTGAAAA	8.85002	5.90731	6.56776e-06	0.000627124		TGTCTGGCGGGG	4.83781	6.99154	1.33299e-05	0.00164634		TTTCACAGTAGATTATTGGTA	8.58934	4.78278	7.00866e-07	8.26922e-05		CCCCCAGG	7.58877	1.9856	1.35627e-08	1.77846e-06		GTTCCTATGTAGAACACATATTCTCGT	5.07389	4.68948	3.53108e-05	0.00380438		ATAT	-5.46687
TGCCCGGAACTGAG	-9.36639	4.23471	9.69954e-10	1.2361e-07		GTACTCCGGAGAG	7.03659	2.31741	1.1381e-06	0.000125919		GATGTTTTTTCCATATTGCGCGAT	-9.59526	4.89302	1.53274e-08	2.44279e-06		CGCTAAGGATCGTGTAAC	-8.32465	5.51559	6.5969e-06	0.00062745		TGGAAGGCCGAGAGGCCTGA	-6.62939	5.27076	1.3515e-05	0.00166474		TGGATGGGAGACCTCCTGGGAACCGTTA	-8.47553	4.80121	7.01592e-07	8.26922e-05		TGATTTTTCTAATGTACTGTTAA	7.33376	1.75546	1.37573e-08	1.79916e-06		TTTGCGACTAAACCTAGATCAA	3.25536	8.38947	3.58198e-05	0.00383864		CTATATGTTGAGAATACTTTCTGAACT	-7.86178
TCTTGGACCGTAGCGAGACGTCCTACT	-6.59056	5.92415	9.82875e-10	1.24922e-07		TGGCAGTGTGATTAGCTGATTG	7.03659	2.31741	1.13864e-06	0.000125919		TCGGTTCCGGG	8.77166	3.62575	1.58782e-08	2.52383e-06		TGTCCGGGGCTGCACGCGCG	-8.68624	5.83664	6.6064e-06	0.00062745		GAATGCACCGGATCCC	6.0937	6.3569	1.35948e-05	0.00166565		CGAATCCTGCCAGGATCGTCACCTTTT	8.43575	4.63598	7.08054e-07	8.32313e-05		GGCGGAATGGCCGAGTGGTCTAAGG	-6.80576	8.54034	1.38338e-08	1.80434e-06		TGGCAGTGTGGTTAGCCGGTTG	-4.73979	4.87496	3.57462e-05	0.00383864		CTTGGCATGGGAGAGGGCTG	9.49573
GTACAACTTAAGTCTTTTTTCGGCA	10.4212	5.81667	9.87933e-10	1.25231e-07		GTTTTTGTTGGATCTCTTGAAAGGCA	-8.81413	4.59235	1.15473e-06	0.000127297		GCTGTATGTCC	8.57979	3.45537	1.60469e-08	2.53719e-06		GGTGAATTTAGGGACAGGTCTTCTAAACTTGTTTA	8.81197	5.8734	6.67342e-06	0.000629057		ACAGCTCACTCAACTGCCAT	-6.0595	5.91179	1.35892e-05	0.00166565		GAGGAATTGATTCTTTCCCAAATCGTC	5.68915	5.65244	7.13801e-07	8.36837e-05		CGGGCTTGGCA	5.481	2.72494	1.39019e-08	1.8084e-06		GACAATAAATCGAGGATTCTCTGGATT	6.93141	4.00525	3.71661e-05	0.00397233		GTTCGATTCCCCGC	9.37047
CAGGGCGGTGGCC	-9.06652	3.949	9.92382e-10	1.25461e-07		GATGAGAAGTGGGAATTCTGAATACC	-8.81417	4.59238	1.19316e-06	0.000131184		AGTTTTGGGT	8.63292	3.50232	1.60474e-08	2.53719e-06		CCGGGCCGGACACT	-8.3164	5.50716	6.67631e-06	0.000629057		TAGAGGTGAAATTCTTGGACCGTAGCG	5.08267	6.84445	1.37372e-05	0.00167864		GCCCGTCGCTGCCCGGAACT	-5.47937	8.41111	7.17371e-07	8.38791e-05		CACCCGGGCC	5.39342	2.19447	1.40323e-08	1.82051e-06		GGTGAATTTAGGGACAGGTCTTCTAAAAA	-7.46704	4.22816	3.75748e-05	0.00400535		GAAAACATTACGTAACTGGGAG	9.32119
GTCCGGGGCTGCACGCGC	-9.10398	3.98375	9.98338e-10	1.25548e-07		GCTCTTATAAGACAATCAAATCGTGTT	-8.74454	4.52929	1.20041e-06	0.000131633		GAAGACGCAATTCTGTCAACTGTAGAT	-9.55909	4.85735	1.63374e-08	2.56941e-06		GGGAGACCTCCTGGGAACCGTTAGT	-8.4008	5.58125	6.64764e-06	0.000629057		GTTGTGACGGATAACG	8.74822	5.72055	1.38167e-05	0.00168298		ATAGGAAATGAATAAGGAGAGA	7.50155	11.3165	7.20097e-07	8.39751e-05		ACCCGGGCC	7.37964	1.79682	1.42103e-08	1.83387e-06		GAAATTGTCGTTGGCCTCTTCATTCTC	6.93143	4.01017	3.835e-05	0.00407717		GTCACTTTCGAGGATTAGCTTCTCTGG	-8.89945
ACCGCGGA	-7.15339	5.16392	9.97969e-10	1.25548e-07		GGTGAATTTAGGGTCAGGTCTTCTAAACTTGTTTTGAGCTAGTAACTCA	7.11739	2.38149	1.20621e-06	0.000131919		GAACTGCAGATCATATGGGACTTGATG	-9.55909	4.85735	1.63186e-08	2.56941e-06		GATACCGCCCTAGTTC	-8.34124	5.52884	6.73694e-06	0.000633094		GTGAAATTCTTGGACCGT	6.19734	6.4512	1.38765e-05	0.00168298		CGAATCCTGCTGGCTGCGAATACTCTTT	5.9905	5.05997	7.40531e-07	8.61302e-05		ACGGGCT	7.37964	1.79682	1.42047e-08	1.83387e-06		AAATTTTTGGGCTGCAGCACCGGGGGATCCGGAGTTGCCG	-5.36574	4.26842	3.94558e-05	0.00418366		ATAGGTTGGAGAATGA	-7.12067
GCACCGGATCCCGTC	-8.94801	3.83954	1.00636e-09	1.26224e-07		GTTGTATTCTCTTGATTAGTAGCGGGT	-8.74476	4.52905	1.21539e-06	0.000132574		GGGCTTGATTGTCGTTTTGGTACAA	-9.77068	5.06385	1.65297e-08	2.58379e-06		TACCCGTAATCCAATGCTGC	4.95143	7.99069	6.77275e-06	0.000633746		CGTGCGAGACCGGG	6.00197	6.29937	1.38823e-05	0.00168298		ACGTCCCTGCCCTTTGT	-8.58208	4.89443	7.44245e-07	8.63344e-05		GCCCGGAACT	5.52197	3.71913	1.43603e-08	1.84836e-06		GTAATTGTGGATTCATTTGAGGAAAA	6.99262	4.05982	4.03272e-05	0.00426482		GACAATAGACAATTGTTAGGCTTAGA	-8.8992
GACGTGAAACCGAT	-9.21824	4.09036	1.02181e-09	1.27825e-07		GTAGTATCGGTATTATTGGGAGAACT	-8.77288	4.55445	1.22722e-06	0.000133513		GGACAAATATCTGATAAGTTGAACT	-9.63788	4.93528	1.65589e-08	2.58379e-06		TTTCGGTTCCGGGGGAAGTATG	-8.3712	5.55809	6.77945e-06	0.000633746		TTTGCGACCGAATCCAGGCCACGA	-4.44621	7.28615	1.43115e-05	0.00172679		GATACCGCCCTAGTTCTA	-8.39419	4.72988	7.6222e-07	8.81874e-05		TTTGCGACTGTATTCAAACTACG	4.14786	6.11332	1.44539e-08	1.85553e-06		AGATCAGAGTCGTGTTTATGGG	6.96592	4.03748	4.06556e-05	0.00427302		ATATAGGTTGGA	-8.8997
GGGTTTCACGTCA	-9.72747	7.68601	1.03154e-09	1.28369e-07		GTAACAATTTGATTTTGAGCTTTCGA	-8.8077	4.58808	1.23515e-06	0.000134023		ACGCAGAAGGTCGCCGGT	-7.78468	5.82349	1.65101e-08	2.58379e-06		ATTGACGGAAGGGCACCACCAGGAGT	-8.47675	5.64839	6.85191e-06	0.000638842		TACCCGTAGTACAATGCTGTCA	-4.65797	6.4514	1.43187e-05	0.00172679		TTTGCGACCTATATCCAGG	8.38862	4.59115	7.7966e-07	8.93954e-05		GGGGGAA	5.58916	1.66407	1.47092e-08	1.88336e-06		TGCGATCAAATTAGACTTATCG	6.91026	3.99148	4.05385e-05	0.00427302		GATATACAGTCTTGAAGTAGAATTATT	-9.01166
CCTGGGAACCGTTAGTGGC	-9.25032	4.12043	1.03145e-09	1.28369e-07		TTTGTCTGGTTGATT	5.19783	3.31868	1.23894e-06	0.000134084		GCTTCTTCTTGCTCGTCTGTAAAT	-9.68211	4.97855	1.67041e-08	2.59964e-06		TGGCAGTGTGGCTAGCTGGTTG	6.32446	5.46127	6.8724e-06	0.00063908		ACCATGTCTGGCGG	6.04669	6.34011	1.44684e-05	0.00173376		GAGTTTTTAAATTCGTCATCAATAACT	6.3949	4.62589	7.79268e-07	8.93954e-05		TCTTTGGTTGTTTGGCTGTATG	4.90644	1.75517	1.4896e-08	1.89805e-06		GAAGTTGTAGAGAAGATGTTA	6.88138	3.96778	4.09364e-05	0.00427302		CGAATCCTGCTCAAGGCGTCTACCCTTT	-7.06311
GAACTGGCACGGACAA	-7.56372	4.319	1.03437e-09	1.28386e-07		GCAATTACCGTTACATGTAGACCAAACT	-8.70834	4.49519	1.24649e-06	0.00013455		AGGCTGGCGTAGT	6.62151	4.49805	1.68705e-08	2.6187e-06		TCGGTTCCGGGGGAAG	-6.4374	6.38493	6.89305e-06	0.00063933		GTAGCGAGACGTCC	4.42831	7.8522	1.45409e-05	0.00173376		CGAATCCTGCTGACTGCGAATTTCTTT	6.02443	5.09249	7.79514e-07	8.93954e-05		TTTAGTTGGATA	5.0836	2.32665	1.49016e-08	1.89805e-06		ATATCCATAAACACCACTCTG	6.88138	3.96778	4.09215e-05	0.00427302		TGAGCTCAAATTAGACTTATCG	-7.03476
ACCGCGGAAA	-7.54502	5.60459	1.05938e-09	1.31149e-07		ACCGGGCA	5.21466	2.21772	1.24989e-06	0.000134566		GTTTAAGATAACGAAGGAAACAAGG	-9.53983	4.83875	1.71234e-08	2.64055e-06		TTCGTTGTTACTGAAACTCGTC	5.47313	7.8682	7.0057e-06	0.000648091		TTTGGCACTGTATAGGCTCCAA	-4.66188	6.21574	1.45724e-05	0.00173376		GTAGAATGAGGACACCATATCAAACCTGAGT	6.01387	5.67072	7.80772e-07	8.93954e-05		TATTTCAATAATATTTGTTTT	7.48456	1.89148	1.50842e-08	1.91632e-06		GTCTTTGTCGAAGTAATTGAAACTACT	6.88138	3.96778	4.09066e-05	0.00427302		TATATCCCAATGGTGATCAAGA	-8.89895
GGGTTGAACTTGAGGATTGTGTACT	10.4609	5.85517	1.0929e-09	1.34947e-07		GAATTTGTTGAAACTCCTTGAAAC	-8.77365	4.55501	1.26169e-06	0.000135135		GTGAAATTCTTGGACCGTAGCG	5.41144	5.78971	1.71441e-08	2.64055e-06		CCGGGGCTGCACGCGCGCT	-5.91428	7.6513	7.08798e-06	0.000654004		GCCCGCTATGGGGATTTTACATCTCCCATAGCAATTTTTGGAAGGCCGAGAGGCCTGA	-5.07315	6.43008	1.444e-05	0.00173376		TCCCATATGGTCTAGTGGTTAGGATTCGT	5.80897	5.76847	7.89485e-07	9.01587e-05		GTTCCGGGGGA	5.57125	1.67254	1.55366e-08	1.96868e-06		TGGCAGTGTGATTTGCTGGTTG	-3.69176	6.19889	4.12173e-05	0.00429119		GAACTGAGCAATATCGAGAGGCAG	9.3801
GGGTTTCACGTCAA	-8.9522	3.84319	1.10445e-09	1.36021e-07		GTTAAACATGAATTGATGAAGGTAGA	-8.7134	4.50004	1.25944e-06	0.000135135		GAAGACCCTGTTG	6.80188	4.66741	1.70586e-08	2.64055e-06		GTAGAATGAGGACACCATATCAAACCTGAGT	6.25113	6.7322	7.12195e-06	0.000655441		ATTTTTGGAGGCTCTCCTTCGGGGGAGCGAT	-5.53513	4.96376	1.46399e-05	0.00173376		CAAAAACATTTTCAGTAGTCA	8.60999	4.80259	8.04371e-07	9.09412e-05		TCGTGTCGGT	5.57169	1.67228	1.56799e-08	1.98171e-06		GTTTCTTAATAAATCTGTGAATTCCAT	5.09952	4.71325	4.14345e-05	0.00430266		GCGCAAAGTTGG	9.31154
AAACAGCGGGGA	-6.49616	5.21794	1.11113e-09	1.36491e-07		GGAGTTGAAAGAAGCATTGAAAAGG	-8.76634	4.54855	1.27366e-06	0.000136065		CCCGGAACTGAGC	7.13706	4.18639	1.71929e-08	2.64124e-06		AACGGGGGCATTCGTATCGCTACGTTAGA	-6.44266	6.37682	7.14094e-06	0.000655494		GGTGAATTTAGGGACAGGTCTTCTAAACTTGTTTTGAGCTAGTAAC	-8.21216	4.99052	1.45751e-05	0.00173376		TGGCAGTGTAGTTCGCTGGTTG	6.37105	4.60352	8.04464e-07	9.09412e-05		CCTTCCAAGCGGCCGATTCGGGTTCGATTCCCGATA	-10.5826	5.5517	1.62365e-08	2.04676e-06		GTAATATTCGGAAAGCGTTTTTTTAAA	6.90319	3.98688	4.18349e-05	0.00433304		GTGTTCCTTTCCATGTTCGTGCAA	-8.89995
GCTGGTTCCGGC	-7.62403	4.37717	1.1166e-09	1.36549e-07		GTTGGAATTTTGAGAGATGTTTAAA	-8.78515	4.56641	1.27772e-06	0.000136148		GATCCCGTCCGAT	10.1626	4.91511	1.72372e-08	2.64124e-06		TTTCGGTTCCGGGGG	-5.55893	6.91986	7.1862e-06	0.000657953		GGGTTATTTTAAAGCTTAGATTTGA	-8.42789	5.20708	1.46057e-05	0.00173376		GTCAACATCGTTTCTGTTTCTAACGCT	6.37105	4.60352	8.03685e-07	9.09412e-05		GTTTCTCGGTT	4.84008	1.70145	1.67366e-08	2.10022e-06		CACTGTT	-4.24787	4.48233	4.21599e-05	0.00435548		GCTGGATATTGAAACTTTTCTTCTGAA	-8.98465
TACGTCCCTGCCCTTTG	-6.72528	5.89759	1.11733e-09	1.36549e-07		GCGATATTTACAAGCAAATCCTTCG	-9.08461	4.84596	1.31098e-06	0.000138859		GGAGGAACATGAAACATTGATGGAGAT	-9.7229	5.01705	1.75859e-08	2.65801e-06		GGGTTATTTTAAAACTTAGATTT	8.99882	6.05048	7.27865e-06	0.000664709		TGCCCGTAGTCCAATGCTGTCA	-4.64388	6.67355	1.48916e-05	0.00175905		AAACGGGGGCATTCGTATCGCTACGTTAGA	-8.43808	4.76763	8.04588e-07	9.09412e-05		AATGGCACCTTTGGACGTGTGCG	4.90673	2.17286	1.67465e-08	2.10022e-06		GAATAGGATCATTCTTGCTTAACTTAG	6.88858	3.97244	4.32484e-05	0.00444731		GTATTTCAAGTCGTCATTTATTTTACT	-8.92882
TCGGAAACGAAAGTCTTTCGGTTCCGGGGGAA	-8.88679	3.7843	1.14253e-09	1.38916e-07		GAAAAACAACAAACTAATTAAAGGCA	-8.85957	4.63644	1.31991e-06	0.000138859		GTTCTTGAAGTTCATTTTTGCGGATA	-9.68582	4.98177	1.76435e-08	2.65801e-06		GTCCGGGGCTGCACGCGCG	-6.63125	6.55077	7.36935e-06	0.000669558		GTGATGCCCTTAGATGTCCGG	5.9804	6.27976	1.50921e-05	0.00177363		GTAATATTCGGAAAGCGTTTTT	6.37134	4.60374	8.07986e-07	9.10916e-05		TGCGAGGATGAAAAACTGAAGCC	5.44782	2.24364	1.74519e-08	2.18309e-06		ATAGGAAATGAATAAGGAG	4.48987	4.974	4.32702e-05	0.00444731		GATATTTTCGTCTATTTGTGGAATTCCT	-8.98204
CCCGGGCCGGA	-8.87265	3.77061	1.14008e-09	1.38916e-07		GCACAGAGTGTAACAATGGAGTCGTA	-8.83304	4.61017	1.30711e-06	0.000138859		ATATATAAAGTAGATTCAAACTGGTGC	-9.58508	4.8831	1.75261e-08	2.65801e-06		TTGGATGGGAGACCTCCTGGGAACC	-10.4604	7.51033	7.35956e-06	0.000669558		TTTGCGACCGAATTCAGGCCAC	-5.24899	5.8966	1.50847e-05	0.00177363		CGATAAACGCACCA	-5.23432	6.78486	8.2123e-07	9.21136e-05		TCCGGGGGAA	5.4396	2.20289	1.76887e-08	2.20707e-06		GGCAGTGTGGTTAGCTGGTTG	-5.25787	5.33823	4.34781e-05	0.00445728		TCGGATATACAGAATATGGCT	-8.98204
GGTTTTAACTCAAGTAATCTGGACA	8.65407	6.36424	1.14725e-09	1.39136e-07		GAAGTTGATTTATCTTGGAATTGTATT	-8.76964	4.5521	1.31635e-06	0.000138859		GATACTTGTTAATAGGTTACTGTTGGAT	-9.55421	4.85265	1.76947e-08	2.65801e-06		AGTCTTTCGGTTCCGGGGGAAG	-8.43266	5.60906	7.42319e-06	0.000672734		GCTGCCCGGAACTGAGCA	8.7536	5.72716	1.51772e-05	0.00177568		GATACCGCCCTAGTTC	-8.40268	4.73677	8.20262e-07	9.21136e-05		GTTAGTGGCG	4.94019	2.20306	1.81699e-08	2.26135e-06		GACAATTTCTTTCGTTACTTCGATCCT	6.89605	3.98227	4.48405e-05	0.00456372		GGCTGCACGCGCG	9.32963
GGAAGAAGTCTGGAGCCTGGAAACT	10.3628	5.75903	1.18132e-09	1.42904e-07		TTTGCGACCGAATCCAGGCCAAG	4.82962	2.54383	1.31813e-06	0.000138859		GGCATTTTCAAAATATTTAGCATTGTC	-9.54672	4.84548	1.77035e-08	2.65801e-06		GTTCCGGGGGAA	-5.71494	7.06736	7.56041e-06	0.000679978		AGATGTCCGGGG	8.74404	5.71671	1.52252e-05	0.00177568		TTCCCTTCGCATG	-8.45752	4.78449	8.23634e-07	9.21488e-05		TTTGCGACTGTATTCACATC	5.77535	1.81802	1.84192e-08	2.28136e-06		TTTGTTAAGGAAGATTTTTTA	6.89605	3.98227	4.4857e-05	0.00456372		GATAAGTTGCATTCGTTGACTATATGA	-8.95713
AGCGGGGAAAG	-7.79533	4.54397	1.19828e-09	1.44588e-07		GTTACTAGTAGGAGATGAGATACACT	-8.70227	4.49002	1.33524e-06	0.000140116		GACCGTAGCG	7.97504	4.96582	1.76838e-08	2.65801e-06		TCGGTTCCGGGGG	-5.98963	6.81696	7.52508e-06	0.000679978		ATAGGTTGGAGA	-5.4928	5.40277	1.51911e-05	0.00177568		TTAAATGAAGACAACCGCTAACCTGAGTC	8.72822	4.91628	8.33868e-07	9.30576e-05		CGCCCGTCGC	5.77535	1.81802	1.8424e-08	2.28136e-06		AGTGTGGTTAGCTGGTTG	-6.93265	3.78815	4.46739e-05	0.00456372		GAATATGTGAACTCTTTCTGTCGTCTC	-8.95713
AGGGCGGT	-9.7848	4.63336	1.22831e-09	1.45998e-07		GTGCATTGACGATTTTCTTGTAGACT	-6.24223	4.97805	1.35259e-06	0.000141578		TACCATTCAGCG	8.87267	3.71632	1.75436e-08	2.65801e-06		CCTTAGATGTCCGGGGCTGCACGCG	-8.49915	5.66815	7.54858e-06	0.000679978		GAAATATATATATAGGT	-6.34491	4.95047	1.53781e-05	0.00178898		GCATTGACGATTTTCTTGTAGACTATT	6.37115	4.60348	8.53046e-07	9.47182e-05		AAGAACTGCCTTATGAACTTTAA	7.42933	1.84221	1.85948e-08	2.29669e-06		TCGAATCCCTCTCTCGTCACC	-3.6008	6.63089	4.57439e-05	0.00463583		ATTGCACATAGACTATTCTGAA	-8.87049
TTACGTCCCTGCCCT	-7.52648	4.28406	1.22834e-09	1.45998e-07		GCGGGTTTAAGTTAAGTTTAAA	7.56355	2.75623	1.35772e-06	0.000141757		GAAGTCGGCA	8.89894	3.73996	1.74735e-08	2.65801e-06		TACCCGTAGTCCAATGCTGTC	4.92234	14.0805	7.63997e-06	0.000683681		CTGAGTCA	-6.30049	4.95349	1.54511e-05	0.00179295		GTCCGGGGCTGCACGCGCG	-6.78866	5.75408	8.51457e-07	9.47182e-05		CGGTTCCGGGGGAA	5.75085	1.82578	1.87972e-08	2.31585e-06		TGGCAGTGTAGTTAGCCGGTTG	-4.20405	4.83331	4.57965e-05	0.00463583		ATATAGGTTGGAGAAT	-8.8987
AGGGTTCGACTCCGGAG	-7.44948	4.98395	1.21692e-09	1.45998e-07		GGTGAATTTAGGGACAGGTCTTCTAAACTTGTTTTGAGCTAGTAA	4.75387	3.4526	1.37675e-06	0.000143382		CAGCAGGCGCG	6.9536	4.00928	1.77579e-08	2.65948e-06		GGGTTCGAATCCCTCTCTCGTCACCA	-6.40428	6.3539	7.62449e-06	0.000683681		GACAAGAGGAATCCG	8.61894	5.60723	1.557e-05	0.00179544		TCCGATGGTCTAGTGGTTAGGATTTGTGGCTC	6.31618	5.31411	8.61028e-07	9.51253e-05		CGGCTCT	4.87015	3.40492	1.91358e-08	2.35163e-06		GACTTATAGCTGTTTCAAGTGATCCTC	6.95886	4.033	4.63852e-05	0.00467347		GTGCAAATCGGT	9.35955
AAAGTCTTTCGGTTCCGGG	-6.95538	5.86512	1.21864e-09	1.45998e-07		AGTGAATGTTGCTTCGGTAATG	-8.85305	4.63026	1.38713e-06	0.000144102		TGAGATCAATGGGAATCTTCAAA	-6.9264	6.39833	1.78344e-08	2.66425e-06		TGGCGGTGTGGTTAGCTGGTTG	8.6183	5.68567	7.70471e-06	0.000686415		TAGCGAGACGTCCT	8.60508	5.59464	1.55599e-05	0.00179544		TCCCATATGGTCTAGTGGTTAGGATTCG	5.98602	5.59014	8.59509e-07	9.51253e-05		TTAGTTGGATA	4.92589	1.74711	1.92225e-08	2.35637e-06		GTGAAGTTCTGTTCTGCTGTGGTCC	6.95886	4.033	4.64009e-05	0.00467347		GAACGGGCTTGGC	5.28176
CTCCGGAG	-6.8963	4.91691	1.22442e-09	1.45998e-07		GTTTTAGGACCAAATATTTTATCTGCT	-8.66705	4.45726	1.39499e-06	0.000144196		GAGAGACGTA	9.32415	4.12778	1.7957e-08	2.67586e-06		TGCCACGCGGGAGTCCCGGGTTCGATT	-8.25798	5.45599	7.72833e-06	0.000686415		TCTATATGTTGAGAATACTTTCTGAACT	-6.32965	9.14873	1.55895e-05	0.00179544		AAGGGTTTCACGTCA	-4.69937	10.8169	8.66989e-07	9.55444e-05		AATGGCACTGATAGT	5.87149	2.63586	1.9372e-08	2.36875e-06		TGAGATTCTCTTTTCTTCATT	3.2561	6.26459	4.65933e-05	0.00468111		TTTGAGACTAACGCTAGGGCTA	-5.48123
GAATGACCTTACAAGAACGTGCCA	10.4131	5.80829	1.2249e-09	1.45998e-07		AGTTGCCGGTAACAGAAACTGTTTTT	-6.17198	5.78433	1.39154e-06	0.000144196		GTAACAATGGAGTCGTCAGAAGCT	-9.51631	4.81592	1.81686e-08	2.70064e-06		GATGTCCGGGGC	-8.26548	5.46285	7.7207e-06	0.000686415		TGAGATCATATTAGACCCATCC	-4.39358	7.97456	1.57159e-05	0.00180549		ACTTGGATGGGAGACCTCCTGGGAACCGTTAGT	-6.40277	6.23217	8.70005e-07	9.56376e-05		CTCCGGAGAGA	5.54997	2.33304	1.95268e-08	2.38174e-06		GCATTTGTCGTTTTCGCCATTTCTGGC	4.46097	5.44432	4.71872e-05	0.00472896		TCAAATCCCACTTCCGTCACCA	-5.50063
GCTGCCCGGAACT	-7.05487	6.86713	1.25042e-09	1.48253e-07		GGGTTTCACGTCA	5.23516	3.30664	1.41111e-06	0.000145499		AAAACAGCGGGGA	6.53473	4.42308	1.84236e-08	2.73174e-06		GTACTCCGGAGAGA	-5.47853	7.22012	7.77879e-06	0.000689178		GGTGAATTTAGGGACAGGTCTTCTAAACTTGA	-8.22115	4.99804	1.59268e-05	0.00182516		TGTGATGCCCTTAGATGTCCGG	-6.60045	5.58479	8.75338e-07	9.59845e-05		TTTGCGACTGTATTCAAACTAC	5.03879	4.01659	1.98574e-08	2.41003e-06		TCCCACTCTCGTCACCA	-4.84869	3.81358	4.73596e-05	0.00473443		TAACCGGATATATCTGACTACAG	-5.88396
TTGGATGGGAGACCTCCTGGGAACCG	-7.81819	4.5596	1.25917e-09	1.4892e-07		GCAGTAATTTTGGTTGTCGGTGAAT	-8.72579	4.51181	1.42454e-06	0.000146519		GCCTTGTTGGAAGTAGCAAATTTTATT	-9.56714	4.86563	1.8661e-08	2.76006e-06		TTCGGTTCCGGGGAAA	-8.36256	5.55074	7.8478e-06	0.000693566		TCGGTTCCGGG	8.6149	5.60305	1.60928e-05	0.00183052		GACCTCCTGGGAACCGTT	-5.79907	5.67044	8.84622e-07	9.67618e-05		GTGTTGGATTGTT	5.27376	2.52608	1.98135e-08	2.41003e-06		GTTAAGAATAGTA	6.89584	3.97709	4.75043e-05	0.00473711		TCGAGTCCCATCGGAATCGTTGACCTTT	-6.16019
AATTCTTGGACCGTAGC	-7.03411	4.58997	1.26242e-09	1.48934e-07		GTAGATGTCGTCCTTTATAGCAATT	-8.68357	4.47289	1.44522e-06	0.000148278		GAGACCTCCTG	6.819	4.68371	1.88687e-08	2.78389e-06		GGTGAATTTAGGGCCAGGTCTTCTAAACTTGTTTTGAGCTAGTAACTCA	8.30874	5.39338	7.87156e-06	0.000693944		CACCGGTTGAGCCCCCA	-4.59941	6.76511	1.60278e-05	0.00183052		GGCAATTCTTGAACAAGTGTATCTACT	6.37129	4.60344	9.20688e-07	0.000100458		TGCACATAGACTATTCTGAA	7.25589	1.69008	2.00506e-08	2.42746e-06		TCGAATCGTCTAGCAGTTAATTT	6.94577	4.01441	4.79503e-05	0.00475798		GTAATATTCGGAAAGCGTTTTTTAAAA	-8.86999
TTTGCACTTAGATACCTGACTACA	7.11523	7.39573	1.2913e-09	1.51965e-07		GTTGATGATCGGTCGTAGG	-12.5406	8.21128	1.47064e-06	0.000149895		GAAAGAACGAATGACCTTACAAGAACG	-9.54742	4.84635	1.89244e-08	2.78521e-06		TGGCAGTGTGATTGGCTGGTTG	8.65072	7.61766	7.94777e-06	0.000698933		ACTTAGGGAA	-6.3703	5.01831	1.60856e-05	0.00183052		TCATTTTATGATTGCGTTATA	8.45851	4.65771	9.3554e-07	0.000101636		TGCGAAAGGATC	5.56344	1.66691	2.07891e-08	2.51066e-06		GAAAAATCAATCATGACTTGGACT	6.94577	4.01441	4.79334e-05	0.00475798		GATATCGGTAGATGTGTAGTACCTGCT	-8.86999
GAACTGGCACGGACAAG	-8.85221	3.75221	1.30186e-09	1.52831e-07		GTAAAACTTTTTCGATTATTGAACG	-8.66097	4.45164	1.47225e-06	0.000149895		GAAACGGAACTTGTAGCTCTTATGTT	-9.57977	4.87759	1.92424e-08	2.81928e-06		CAGTAATTGTTTAATAAAAATATAGCATTTGG	9.08492	6.13361	7.98007e-06	0.000699222		CAGTAATTTGTTTAATAAAAATATAGCATTTGG	-8.83199	5.6102	1.62607e-05	0.00184507		TGCCACGCGGGAGTCCCGGGTTCGATT	-8.32041	4.66595	9.36099e-07	0.000101636		GTGGCGGAATGG	5.16477	2.39819	2.11218e-08	2.54455e-06		TGAATCCTGTGACCCGAGTGCAAATCTCGGTGGTGCCTCCA	3.85787	5.77773	4.81616e-05	0.00476717		TACTGGCCTTCAAACTTCTTA	-9.00166
GTTTTAGACAACAATTTAGATCCACA	10.3197	5.71704	1.30547e-09	1.52878e-07		GGCGAGATGG	-6.28267	5.87163	1.47544e-06	0.000149895		GTTGTATTCTCTTGATTAGTAGCGGGT	-9.53151	4.83076	1.92505e-08	2.81928e-06		TGGATGGGAGACCTCCTGGGAACCGTTAGTG	-8.28552	5.47939	7.99033e-06	0.000699222		TTTGCGACCAAATCCAGGCCAC	-4.49451	7.37412	1.64945e-05	0.001867		TGTATTTTAACATCTTTCTTA	8.36462	4.56833	9.44116e-07	0.000101754		GCCTGCCACGCGGGAGTCCCGGGTTCGATTCCCGGTC	-9.86708	4.86288	2.11771e-08	2.54495e-06		TGAGATCAATGGGCATCTTCAAA	6.83717	3.93412	4.88146e-05	0.00479636		CTGGGAACCGTTAGTGGCG	9.31286
GAACATGTCAACTAAATATGAACTACT	10.4709	5.86578	1.33246e-09	1.55656e-07		TGGCAGTGTAGCTAGCTGGTTG	5.01856	3.76009	1.47254e-06	0.000149895		TTGGACCGTAGCGAGACG	6.15211	5.25736	1.93893e-08	2.83264e-06		AGGGTTCGACTCCGGAGAGGGA	-8.50314	5.67158	8.08771e-06	0.00070601		GTCCGATCTCCG	8.71256	5.69068	1.65835e-05	0.00187248		GATGTCCGGGGCTGCACGCGCGCT	-5.89314	6.27352	9.43767e-07	0.000101754		CCCCCAGGATA	5.7557	2.53028	2.13778e-08	2.56277e-06		AAAGATCAGAGTTGTGTTTAT	6.83717	3.93412	4.87937e-05	0.00479636		GTTTGGATTTACTAGAAGTCTTTCGTT	-8.90045
GCCAGCCCTGTTG	-7.50461	4.26876	1.33767e-09	1.55883e-07		GTAATTCTCAACTTCATCGTAGGACT	-8.67151	4.46174	1.48338e-06	0.000150319		GCTCTTATAAGACAATCAAATCGTGTT	-9.5329	4.83242	1.94951e-08	2.84057e-06		TCGTGTCGGTGGATCA	-8.42187	5.5993	8.14461e-06	0.000708		AGGGTGATAT	-5.11	5.70237	1.67466e-05	0.00188626		CCGCCCGTCGCTGCCCGGAACTGAGCA	-6.5879	6.40676	9.40381e-07	0.000101754		AGTTGCGAGCT	5.86077	1.91264	2.15449e-08	2.57649e-06		ATTTGCTTATGTTTCCACGATCAA	6.83717	3.93412	4.87728e-05	0.00479636		AACCGGATATATTTGACTACAG	-9.16434
TTCGGTTCCGGGGGAAGTATGGTTGCA	-6.48472	5.85763	1.34249e-09	1.56063e-07		TCTCTGG	4.32832	2.875	1.48687e-06	0.000150319		TTCGTATCGCTACG	8.83664	3.68395	1.95389e-08	2.84057e-06		CTTGGATGGGAGACCTCCTGGGAACCGTT	-8.45574	5.62935	8.15026e-06	0.000708		CTGGGAACCGTTAGTGGCG	5.96846	6.2689	1.7457e-05	0.00195793		GTATCCAATAGCTTTCGTTGTTTTT	8.14881	7.09389	9.48964e-07	0.000102028		TTTGCGACCGAATCCAGGCCAAG	5.57053	2.35551	2.1954e-08	2.619e-06		GAATAGACGTCATCTGTTTTTAATAGA	6.88879	3.97766	4.99819e-05	0.00488701		GCTCGGCTT	-8.84043
TGGGGCGGT	-7.05449	5.06891	1.34859e-09	1.56391e-07		GTAAAACTCTCCGTTGATGGCAAAA	-8.83706	4.61423	1.49054e-06	0.000150323		ACCGCCCGTCG	8.71364	3.574	1.96946e-08	2.85624e-06		CGGGGCTGCACGCGCGCTAC	-8.68786	5.8376	8.29049e-06	0.000718428		GGCGACGTGGG	4.3088	7.87904	1.74679e-05	0.00195793		GTGAATCCGTGG	8.33991	4.54492	9.59454e-07	0.000102205		GAGGT	5.34657	2.15416	2.20406e-08	2.61964e-06		GATAAATGACTATCGAAGATTCTAGC	6.867	3.95845	5.05884e-05	0.00488701		GATAGATATAATCTTGAGTTTGTTAGTG	-8.84094
GCTGCCCGGAA	-9.08478	3.96985	1.356e-09	1.56868e-07		GAAAGAACGAATGACCTTACAAGA	-10.2741	5.98251	1.50977e-06	0.000151893		GCAATTACCGTTACATGTAGACCAAACT	-9.49821	4.79796	1.97617e-08	2.85902e-06		TGGCAGTGTAGTTAGCTGGTCG	8.52389	5.59595	8.58955e-06	0.000742537		GAAAGTTAGAGGTTCG	8.73019	5.70427	1.76868e-05	0.00197397		GGCGGTT	8.33991	4.54492	9.59316e-07	0.000102205		CCACCAGGAGT	5.62908	1.72164	2.20664e-08	2.61964e-06		GTGGCGGAATGG	6.82244	3.92464	5.0474e-05	0.00488701		GGGGATATAGCTCAGCGGTAGAGCATGTGACTGC	-6.26526
GGTGAAATTCTTGGACCGTAGCGAGACGTCCTACTGCG	-9.70207	4.55426	1.36479e-09	1.57362e-07		GAACATTTATATCGTTAAAGTCCAGT	-8.79033	4.57212	1.52423e-06	0.000152657		TGTGTTTGGT	7.13258	4.11841	1.99935e-08	2.88555e-06		ATCCGCGCCTGTCACG	-8.43024	5.60647	8.61944e-06	0.000743317		CCGGAGAGGGAGCCTGAGAAACGG	8.6305	5.61641	1.77034e-05	0.00197397		TTGCACTTAGATACCTGACTAC	5.32849	5.84965	9.53753e-07	0.000102205		ACCGCCCGTC	4.88188	2.17917	2.21904e-08	2.62797e-06		CCGGAGAGGGA	6.82244	3.92464	5.04952e-05	0.00488701		GTGAAATTCTTGGACC	6.59815
AAGCTCGTAGTTGGATTATAA	-8.97346	3.86576	1.36687e-09	1.57362e-07		GCATTTGTCGTAGAATCTCGGTACA	-8.74438	4.52796	1.52473e-06	0.000152657		CAGCCGCG	8.81868	3.66783	2.00882e-08	2.89221e-06		GTCGGAACCCGCTA	-8.29183	5.48424	8.84879e-06	0.000761252		TTTCGGTTCCGGGG	8.59107	5.58192	1.77737e-05	0.00197397		TTAGATAGATGTAGACTGTGTCTGATTTCTGCCCAGTGCA	-8.33586	4.68059	9.59885e-07	0.000102205		GGGGATATAGCTCAGTGGTAGAGC	-8.61926	8.04915	2.30757e-08	2.71966e-06		GTTTCTGTGTATTCTGGATATGACACA	6.82244	3.92464	5.05165e-05	0.00488701		TGGGATCAAATTAGACTTATCG	-7.03475
AGATGTCCGGGGCT	-9.02405	3.91307	1.40197e-09	1.59858e-07		GAGATATGATGGTATGATCTGTAGTC	-8.63936	4.43192	1.52965e-06	0.000152781		GGCGAAATGGCCGAGTGGTCTAAGG	-8.107	7.32118	2.02523e-08	2.89374e-06		GCACCTTCTCGGAAAC	-6.4319	6.38088	8.92513e-06	0.000762193		TCGAATCTGACAATA	-5.44814	4.87985	1.77824e-05	0.00197397		TCCCTGAGATTTCGTATAACCGG	8.52535	4.72152	9.64767e-07	0.000102477		GCACGCGCGCT	7.72346	2.11195	2.30465e-08	2.71966e-06		GAATTAATATCATTTATCGTGGATG	6.82244	3.92464	5.05378e-05	0.00488701		TTAAAGCTTAGATTAAACGTCC	-4.78969
AATTCTTGGACCGTAGCGAGACGT	-8.84551	3.74643	1.39515e-09	1.59858e-07		GAACTTGATAATCGAAGATGATAATGG	-8.64856	4.44065	1.54166e-06	0.00015361		GTTTGATTGATTGTTCTTTGATTGATT	-7.3432	5.38873	2.02167e-08	2.89374e-06		TTACGTCCCTGCCCTTTGTA	-6.45747	7.79498	8.88602e-06	0.000762193		GTTTAGAGGAATAGGGG	8.6447	5.62883	1.79958e-05	0.00199286		TTTGCGACTAATCCAGGCC	5.4709	5.67781	9.73134e-07	0.000103117		TTTGCGACTGGATCCA	5.33951	2.14928	2.35639e-08	2.77052e-06		CAAGCGGCCGATTCGGGTTCGATTCCCGATAAACGCACCA	3.11162	6.8511	5.01496e-05	0.00488701		AGGCAAGATGTTGGCATAGCTGA	-4.8783
ATTCTTGGACCGTA	-8.836	3.73747	1.39874e-09	1.59858e-07		TGGCAGTGTGACTAGCTGGTTG	4.73263	2.43738	1.55636e-06	0.000154703		GGTTCCATGGTGTAGCGGTTAGCACTCAG	-6.07208	9.27259	2.02111e-08	2.89374e-06		TTCGGTTCCGGGGAA	-8.22702	5.42925	8.94532e-06	0.000762193		GCCAAGTGTTGG	8.71683	5.69459	1.83914e-05	0.00201396		ATTGACGGAAGGGCACCACCAGGAGT	-8.53686	4.85337	9.82749e-07	0.000103886		CCAACCATAGCTCAG	5.10344	5.32023	2.40007e-08	2.8151e-06		GTGAACTGTATGGCGATGTTTAACA	6.84451	3.93886	5.07912e-05	0.00489483		CGAGCCCCCTGGAGGGCTTAGTCTTTT	-8.87126
CCATCGGAATCGCCA	-6.76427	5.34665	1.4004e-09	1.59858e-07		CCTTGGCATGGGAGAGGGCTGGGGTTCGATTCCCCATATCTCCACCA	-8.94109	4.70965	1.56126e-06	0.000154819		CGGGCCGGACACTAT	8.73332	3.59153	2.0293e-08	2.89374e-06		TAGGGTTCGACTCCGGAGAGGGAGCCTGAGAAACGGCT	-8.31266	5.50248	8.90259e-06	0.000762193		GTGTCGGTGGA	8.57837	5.5708	1.8399e-05	0.00201396		GACTTTATCCAGAATCGCTTTTAGGACT	5.93729	5.00938	9.88597e-07	0.000104254		TCCCTGAGACTCTGCTTGTG	5.69074	2.42978	2.51633e-08	2.94441e-06		GGTTTGGAACTTGGATGAGGGAGTCT	6.99439	4.05084	5.13817e-05	0.0049399		GATTTTCAGAAACCATAAGACCGTTTT	-9.06468
CCCGTCCGATCTCCGAA	-7.49273	4.25186	1.41638e-09	1.61116e-07		AATGGCACCTTTGAACGTGTGCG	4.42244	10.2827	1.59002e-06	0.000157294		GTAGTATCGGTATTATTGGGAGAACT	-9.56077	4.85887	2.04048e-08	2.90274e-06		ACAGCTCACTCAACTGCCAT	8.47189	5.54877	8.98909e-06	0.000764094		TCCCTGAGACTCTCCTTGTGA	-4.98565	7.04764	1.83457e-05	0.00201396		GATAAATAGTCTTTTGGATCGTCAGGT	8.33981	4.54484	9.94241e-07	0.000104375		TTGTTGAAATAAAAGATTTTA	7.37165	1.79135	2.54029e-08	2.96535e-06		GGTGAATTTAGGGACAGGTCTTCTAAACTT	-4.94605	5.15125	5.17614e-05	0.00496452		CGAATCCTGCTGGCTGCGAATACTCTTTT	-6.23413
GCTGTTGTTTGAACCGGGCA	-6.53222	5.90088	1.42314e-09	1.61499e-07		GTTGAAAGTGTATGTATAGTCTGAT	-8.65787	4.44901	1.59799e-06	0.000157706		GTAACAATTTGATTTTGAGCTTTCGA	-9.5966	4.89496	2.05039e-08	2.90298e-06		CCGGGGGAAG	-5.6891	6.52668	9.09562e-06	0.000769476		GGTGAATTTAGGGACAA	-8.11933	4.89975	1.83305e-05	0.00201396		TGTCCGGGGCTGCACGCGCG	-8.74563	5.03982	9.94478e-07	0.000104375		TTCGGTTCATAGGT	5.16262	3.339	2.54754e-08	2.96673e-06		TGTTTTGGATATACAGGATATGG	6.85974	3.95377	5.31561e-05	0.00505434		GTAAAATTCGAGAAGCTGTTTAACA	-8.81025
CTGGCACGGACAA	-7.50272	4.26677	1.42871e-09	1.6152e-07		CAGTAATTGTTTAATAAAAATATAGCATTTGG	5.44962	4.41059	1.6111e-06	0.000158622		TAATTGAGGGTGATAT	-6.3996	6.08843	2.04726e-08	2.90298e-06		TTCTTGGACCGTAGCG	-6.08563	6.90643	9.07735e-06	0.000769476		GGGTTATTTTAAATCTTAGATTTGA	-8.27348	5.05438	1.84049e-05	0.00201396		ATAGGTTGG	6.75895	5.03442	1.00588e-06	0.000105321		TACCCGTAGTCCAGTGCTGTC	4.6481	4.2286	2.59418e-08	3.01387e-06		GTAGTTATTCACCGGCTTCTTATTATG	6.85974	3.95377	5.31785e-05	0.00505434		GTATCCAATAGCTTTCGTTGTTTTTAAA	-8.8412
GCCCGGAACTGAGCAAT	-6.7182	4.74438	1.4301e-09	1.6152e-07		GCAGCCAAGTACTGTGGAATCAACG	-9.04089	4.80531	1.62384e-06	0.000159347		GTTTTTGTTGGATCTCTTGAAAGGCA	-9.60747	4.90419	2.08036e-08	2.92736e-06		CCGGGGCTGCACGCGCG	-8.57045	5.73158	9.12894e-06	0.000770466		TTCGTTGTTACTGAAACTCGTC	-4.64509	8.22042	1.86297e-05	0.00203372		TTTGCGTACATATTTCTGAACC	6.79313	5.06759	1.01483e-06	0.000106007		GCCCGGAAC	5.07841	3.25517	2.68689e-08	3.11418e-06		GAAAGAACGAATGACCTTACAAGAACA	6.85974	3.95377	5.32009e-05	0.00505434		GGTGAAATTCTTGGACCG	9.25444
TACCGCCCTAGTTCT	-8.80935	3.7122	1.45428e-09	1.63863e-07		TGGCAGTATGGTTAGCTGGTTG	4.71439	2.85655	1.62615e-06	0.000159347		GATGAGAAGTGGGAATTCTGAATACC	-9.60423	4.90109	2.07868e-08	2.92736e-06		GATGTCCGGGGCTGCACG	-6.63127	6.55036	9.19967e-06	0.000773224		TGGCAGTGTGGTTAGCTGGTCG	-4.84844	6.06006	1.87025e-05	0.00203685		GTAGGTGTAGTAGAATTATTTTT	8.68983	4.87931	1.0258e-06	0.000106899		CCCGTCCGAT	5.81813	2.5829	2.77808e-08	3.21227e-06		ACTCGATTAGTTTATTTTTAAAATATGGCTCTGA	-9.66559	6.31635	5.31459e-05	0.00505434		GATATTTGAGATTGTTGATTGATTGTT	-9.03865
TCTTGGACCGTAGCGAGACGTCCTACTGC	-8.81677	3.71937	1.47751e-09	1.66021e-07		TACCCGTAGTCC	4.77991	2.94553	1.65094e-06	0.000160261		GTTACTAGTAGGAGATGAGATACACT	-9.49032	4.79063	2.08235e-08	2.92736e-06		TGGATGGGAGACCTCCTGGGAACCG	-8.5111	5.67843	9.21253e-06	0.000773224		AATTGCGAATATATCCAGGTAG	-5.37418	5.9615	1.87924e-05	0.00204181		GCCCGGAACTGA	-5.2132	7.11251	1.02915e-06	0.000106995		GTTAAGAATAG	4.6424	4.73656	2.82434e-08	3.25805e-06		GACTATTATTCATTCATTGTATCGACT	5.05538	4.67674	5.37361e-05	0.00509315		GTAGGTGTAGTAGAATTACTTTT	-5.46591
TTACGTCCCTGCCC	-7.35129	4.89124	1.4804e-09	1.66021e-07		AATCAAGAACTGGCACGGACA	5.31995	2.29794	1.64166e-06	0.000160261		GTTAAACATGAATTGATGAAGGTAGA	-9.50612	4.80577	2.10158e-08	2.93121e-06		CGAAAGTCTTTCGGTTCCGGGGGAA	-8.5111	5.67843	9.22676e-06	0.000773224		GGTGAAATTCTTGGACCG	5.90874	6.21477	1.90588e-05	0.00206588		ACACACCGCCCGTCGCTGCCCGGAACT	-9.0823	5.34659	1.03299e-06	0.000107141		GCGCGCT	5.17567	2.37098	2.85559e-08	3.28635e-06		GGGTTATTTTAAACCTTAGATTTGAA	-7.38253	4.18704	5.4598e-05	0.00516266		TTTGCGATTTTTTCCAGCGCTA	-5.94968
TTCGGTTCCGGG	-6.89654	5.89816	1.48743e-09	1.66418e-07		GGTGAGTTTAGGGACAGG	6.7791	2.11647	1.64612e-06	0.000160261		GGTCGGGTGGTAGGAGCAAATT	-6.8167	6.04427	2.09107e-08	2.93121e-06		CAGTAATTAGTTTAATAAAAATATAGCATTTGG	9.16618	6.21224	9.2688e-06	0.000774924		TATTGCACACGTCTCGGCCTGA	-5.06935	7.51764	1.91951e-05	0.00207121		TATAAAGATGAAGTTTCGGATA	8.33976	4.5448	1.04024e-06	0.000107144		GACTGTC	5.75525	1.79402	2.87134e-08	3.29672e-06		CATAAACACCACTCTGATCTAC	6.95166	4.02851	5.47462e-05	0.00516452		TCAGAGTGGCATTTATGGATA	-8.98514
GTCGCTGCCCGG	-8.81449	3.71741	1.49561e-09	1.6694e-07		ACAGCTCACTCAACTGCCATGA	6.7791	2.11647	1.64853e-06	0.000160261		TAACTATGACTCTCT	6.68384	4.55684	2.10128e-08	2.93121e-06		TTGGATGGGAGACCTCCTGGGAACCGTTAGTGGCGTA	-8.19107	5.39679	9.33997e-06	0.000779046		TCCCATG	-5.33895	5.89262	1.91978e-05	0.00207121		TTTGCGACTGTATCCACAT	5.7241	5.59221	1.03831e-06	0.000107144		AGGCGCG	5.09772	1.87614	2.94277e-08	3.35739e-06		TGCGTGTGGGAGAGATGCGTTCGCGCACTCTCCCGA	-4.27243	4.52768	5.58502e-05	0.00525633		TTTGCGACTGTATCCACATCACTA	-5.73006
GCACCGGATCCCGT	-8.79959	3.70301	1.5443e-09	1.71572e-07		GTCTTACGCTCATC	6.85472	2.17499	1.66101e-06	0.000160487		TCCGGAGAGAG	8.98298	3.81589	2.10475e-08	2.93121e-06		GGTGAATTTAGGGACAGGTCTTCTAAACTTGTTT	6.04075	6.33809	9.37937e-06	0.000780504		TGAAAGACATGGGCAGTGAGACG	-5.26656	9.10335	1.93828e-05	0.00208628		GGTGAAATTCTTGGACCGTAGCGA	-5.6273	6.70351	1.0403e-06	0.000107144		CGAGCCCCGCATCGGGCTATCCTTT	7.24836	1.68445	2.94478e-08	3.35739e-06		TATTGGTTAATGATAAATTGA	6.95308	4.01897	5.68327e-05	0.00533629		GAAAACATATATCCTTCCTCGGACG	-8.95762
ACGGCGGGAGTA	-6.84276	6.24363	1.54159e-09	1.71572e-07		CTCTGGTCGAT	6.85472	2.17499	1.65793e-06	0.000160487		CCAGGAGTGG	7.24381	4.28592	2.12932e-08	2.95851e-06		ATTGACGGAAGGGCACCACCAGG	-8.38468	5.56595	9.45615e-06	0.000785059		CGGTTCCGGGG	5.46957	7.16201	1.94589e-05	0.00208959		GGTGAAATTCTTGGACCGTAGCGAGACGTC	-8.41562	4.7545	1.05197e-06	0.000107902		CTCCTGGGAACC	7.24836	1.68445	2.94236e-08	3.35739e-06		GGTGAATTTAG	-5.90036	4.6819	5.7298e-05	0.00536506		GATTTTTTTGTAGTTCGTTTTGAAGGT	-8.77942
GAAACTGGATAAGGTGCTTAATGTAG	10.2948	5.69257	1.54846e-09	1.71634e-07		GAGATGTAGAGACCAAATAACGACT	-8.68194	4.47174	1.67274e-06	0.000160498		GGCGAGATGGCCGAGCGGTCTAAGGC	-6.66123	12.1384	2.13947e-08	2.9657e-06		TTTTGTATTGCTGAATTTTTGC	6.2671	6.68411	9.57272e-06	0.00078972		AGGGAGCCTGAGAAACGG	8.70267	5.67984	1.95054e-05	0.00208971		AGTCTTTCGGTTCCGGGGGAAG	-8.49291	4.81438	1.05256e-06	0.000107902		GGCGTAGT	5.51125	1.6015	2.96261e-08	3.36887e-06		GGTGAATTTAGGGACAGGTCTTCTAAACTTGTTTTAAAA	-6.856	3.72848	5.74061e-05	0.00536506		TTTACGCTTTTTAGTTAACA	-8.77942
AGAACTGGCACGGACAAGAGGAAT	-8.80992	3.71347	1.55587e-09	1.72055e-07		GTAATTCTAATACGGTCAATGTTCT	-8.66756	4.45851	1.67072e-06	0.000160498		AATGCACCGGATCCCGTCC	8.72336	3.58266	2.15035e-08	2.97387e-06		ATCTATGCTGAATAACAAATTTAGTCTTTCACCCCTATCTGACA	6.18358	5.33012	9.57882e-06	0.00078972		CTTCGGATGCG	4.98005	6.75074	1.98971e-05	0.00212672		GACCTCCTGGGAACCGTTAGT	-5.28754	6.38023	1.06283e-06	0.000108646		GTGTCGGT	5.51125	1.6015	2.96862e-08	3.36887e-06		GATATTATCTTTAGTCATGTCGTTTCTC	6.88139	3.97304	5.77894e-05	0.00537589		GATATAATACCACATTTACTCTGATTT	-8.77915
AAGTCGGAACCC	-8.80016	3.7043	1.56102e-09	1.72225e-07		GATTTTTTTGTAGTTCGTTTTGAAGGT	-6.34649	5.07458	1.66771e-06	0.000160498		GAATTTGTTGAAACTCCTTGAAAC	-9.56295	4.86084	2.1791e-08	3.00023e-06		GATGTCCGGGGCTGCA	-6.21982	7.00888	9.56656e-06	0.00078972		GTTCGACTCCGGAGAGG	8.66259	5.64441	2.01735e-05	0.00215128		GAGAGGCAGGAAGAGA	-8.30929	4.65474	1.06475e-06	0.000108646		GTGCGGTGATTAAGAGAATTTCTGAGCT	4.47988	4.1797	2.97639e-08	3.36986e-06		AGCTGGTTG	-6.87309	3.73866	5.77214e-05	0.00537589		GATGAATGTATGAAATCGTTTGAACGG	-8.77969
CGCTGCCCGGAACTGA	-7.57312	4.33546	1.57839e-09	1.73739e-07		GAGCAATATCATTTCTGTAGGAGGC	-8.61674	4.41099	1.67841e-06	0.00016067		GCTGCCCGGAACTG	6.57083	4.45119	2.17948e-08	3.00023e-06		TGCCCGGAACTGAGCA	-5.48938	7.23832	9.67794e-06	0.000794216		TGGCAGTGTGTTTAGCTGGTTG	-5.52889	4.91739	2.03578e-05	0.00216592		TTTGAGACTAACGCTAGGGCTA	5.86375	4.93944	1.13518e-06	0.000115565		GTAGCGAGACGTCCT	5.28457	2.90437	3.10914e-08	3.50395e-06		GAACATGTCAACTAAATATGAACT	6.85238	3.94909	5.81781e-05	0.00539954		GTCTAACTCGTTGAAATTCTGCTACT	-8.77969
GAGAACCCTCCCACACTGATCGACA	10.3972	5.79307	1.58729e-09	1.74316e-07		GCACACATCAAATTTTTCGTGGACT	-10.3493	6.05247	1.69939e-06	0.000162238		GAAAGTCTTTCGGTTCCGGGGG	6.45706	5.54399	2.19748e-08	3.01804e-06		CCTCCTGGGAACCGTTA	-6.3588	6.30018	9.65871e-06	0.000794216		GTAGACTGTGTC	8.59659	5.58789	2.06787e-05	0.00219439		CTTTCGGTTCCGGGGGAAGTATG	-8.40085	4.73311	1.13904e-06	0.000115691		CGAAGCGGT	7.54618	1.93398	3.10668e-08	3.50395e-06		GTAATATTCGGAAAGCGTTTTTTAGA	6.79162	3.89966	6.03017e-05	0.00555883		TTTGAGACTAACGTTAGGGCTA	-6.77084
CAAGAACTGGCACGGACAAGAGGAATCC	-8.8042	3.70697	1.63796e-09	1.79468e-07		GTTAAATTTGTCTGGAGTGAAGAATA	-8.62536	4.41888	1.70262e-06	0.000162238		GTAGATGTCGTCCTTTATAGCAATT	-9.4716	4.77243	2.21991e-08	3.04184e-06		TGGCAGTGTAGTTAGCCGGTTG	8.22279	5.31278	9.77554e-06	0.000798545		TGATATGTCTGGTATTCTTGGGT	-4.44329	13.7049	2.07597e-05	0.00219439		TGATATGTCTGGTATTCTT	6.32252	4.5576	1.14646e-06	0.000116178		GAGAGGAACC	5.36097	2.16352	3.18944e-08	3.57794e-06		GACAAAATCATTTGACTTGGAATCATC	6.79162	3.89966	6.03248e-05	0.00555883		ATCGCTTCTCGAGCTTTTTAGCTCAGATCAAAGTG	-4.59746
GTCATCATAGGCCAAGTAGTACAAT	10.2921	5.68989	1.64201e-09	1.79499e-07		TGAAAGACATGGGTAGTGAGACG	-4.56302	13.8674	1.71535e-06	0.000162343		GAGAAGTAGCTCTGAGTTTAGCCCTAC	-9.50125	4.80125	2.22604e-08	3.04324e-06		GAAAGTCTTTCGGTTCCGGGGGAAGT	-7.1031	9.37433	9.76277e-06	0.000798545		TGGCAGTGTAGTTAGCCGGTTG	-4.80556	5.64453	2.07683e-05	0.00219439		TCTTGGACCGTAGCGAGACGTCC	-5.3483	6.14109	1.15267e-06	0.000116539		CCGCCCGTC	5.53169	2.80329	3.18328e-08	3.57794e-06		GTCAACATCGTTTCTGTTTCTAACGCT	4.97593	4.58143	6.04477e-05	0.00555883		GATAATTTCCTTCCCTCGTCAAAACAT	-8.77889
AACCGCGGAA	-7.55019	4.31371	1.66725e-09	1.81012e-07		TGACAGTGTAGTTAGCTGGTTG	4.68072	2.86032	1.71547e-06	0.000162343		AATATCTGAATTGTTTACAAGA	-6.73393	6.90855	2.23778e-08	3.0523e-06		GGGTTATTTTAAAGCTTAGATTTGAA	8.70913	5.77213	9.81947e-06	0.000799467		GTAGCGAGACGTCCT	4.22809	8.03741	2.08162e-05	0.00219441		ATAGGTCTATTTGTTTTCTCAT	6.27178	4.51054	1.15673e-06	0.000116681		CGAGCCCCGCATCGGGCTGACTTTTT	7.41852	1.82419	3.19674e-08	3.57794e-06		AACAGCTTACCAAATTGCCATC	-4.42926	4.18089	6.01246e-05	0.00555883		TGAGATCATGTTAGACTCA	-5.67102
CGCCCGTCGCTGCCCG	-7.45105	4.21844	1.66269e-09	1.81012e-07		TTTTAAAAAAAAA	5.04709	2.09192	1.71119e-06	0.000162343		GATAAGTTGCATTCGTTGACTATATGA	-9.73571	5.03025	2.24438e-08	3.0537e-06		CGAGAGGCCCCGGT	-6.36271	6.30386	9.85417e-06	0.000799467		TGATATGTCTGGTGTTCTTGGGT	-4.60601	7.54243	2.09057e-05	0.00219883		TTCACCGGGTAGACAAACGC	-8.26143	4.61404	1.15967e-06	0.000116711		GACCTCCTGGGAACC	5.49416	1.61025	3.24763e-08	3.61011e-06		ATCATTTTATGATTGCGTTA	6.85934	3.94831	6.14727e-05	0.00557858		TAACCTGTCACTCGATGCTTATG	-5.67909
GTTCCGGGGGAAGT	-6.60732	5.78357	1.66521e-09	1.81012e-07		GAAATTAGTCGTCTTATTCTTCACT	-10.6681	6.36596	1.73566e-06	0.000162885		GTTTTAGGACCAAATATTTTATCTGCT	-9.45732	4.75812	2.25061e-08	3.0537e-06		ATCCTGGTA	-8.315	5.50887	9.84138e-06	0.000799467		CATGTCTGGCGGGG	5.19434	6.41192	2.1088e-05	0.00221294		TCTATATGTTGAGCATACTTTCTGAACT	8.4121	4.61351	1.16602e-06	0.00011704		GCTGGTTCCGGC	5.49417	1.61025	3.24112e-08	3.61011e-06		GAGGATATTGATAATGAAAAAACAGCT	6.85934	3.94831	6.1448e-05	0.00557858		AAGTCTTTCGGTTCCG	6.54121
GCCGTTGGGCTTTGCCCGCGCGAGTTCG	-8.78975	3.69375	1.67473e-09	1.81411e-07		GTGTTAGTGAGAACGTTTGTGATGT	-8.66412	4.45431	1.73692e-06	0.000162885		ACACCGCCCGTCGCT	6.90917	3.97721	2.25418e-08	3.0537e-06		CCGGGGGAAGT	-6.07132	8.07619	9.8772e-06	0.000799514		CTTGGACCGTAGCGAGACG	8.52564	5.52457	2.15462e-05	0.00225302		TGTGTCTGATTTCTGCCCAGTGC	-5.67826	6.07281	1.16825e-06	0.00011704		ACACCGCCCGTCGCT	5.4946	1.60997	3.24344e-08	3.61011e-06		TTTCAAAATTTGTTAAGGAAGA	6.79912	3.90447	6.16341e-05	0.00557858		ACTCGATT	-5.49187
TTCGGTTCCGGGGAAAGT	-8.89427	3.79224	1.67888e-09	1.81448e-07		GGGGATATAGCTCAGCGGTAGAGC	-6.14366	4.86649	1.73611e-06	0.000162885		GTAATTCTCAACTTCATCGTAGGACT	-9.45963	4.76071	2.26671e-08	3.06371e-06		CCGCCCGTCGCTGCCCGGAACTGAGC	-6.49732	7.29718	9.95832e-06	0.000804253		GGAGAGGGCTGG	4.99823	6.76695	2.15677e-05	0.00225302		GAGGTGAAATTCTTGGACCGTAGCGAGACGTCCT	-8.37669	4.72001	1.17672e-06	0.000117621		CAGCGGGGA	5.62615	2.40462	3.26892e-08	3.62269e-06		GCACATTTTAGAATTTTGAATTTTTCTT	6.79912	3.90447	6.16182e-05	0.00557858		GTAAGTCT	-5.77549
GCCCGGAACTGAGCAATATCGAGAGGCA	-8.79323	3.69835	1.69578e-09	1.8286e-07		GGTGAATTTAGGGACAGGTCTTCA	4.34743	3.89667	1.72612e-06	0.000162885		CCGGGGGAAGT	8.40759	3.30445	2.27901e-08	3.07336e-06		TTGGACCGTAGCGAGAC	-5.39722	8.42333	1.00212e-05	0.0008075		TTTGCGACCTCTATCAGACCTCT	-4.3552	7.13542	2.17407e-05	0.00226119		ACCGTAGCGAGACGTCCT	-5.60877	6.38459	1.19424e-06	0.000119103		GATCAGAGTTGTGTTTATGGG	7.18921	1.6339	3.30548e-08	3.62269e-06		GAAAGAACGAATGACCTTACAAGAAC	6.79912	3.90447	6.16022e-05	0.00557858		GAAATATATATATAGGTTGG	-8.82645
GATACCGCCCTAGTTCTA	-8.75569	3.66289	1.72181e-09	1.85248e-07		ATTGGAACTTATCTTAACTTTGTTTAAT	-8.69028	4.47893	1.74804e-06	0.000163558		TATAATGAAGAATTATCGGTTTTACCCCTGATA	-9.68712	4.98229	2.30303e-08	3.08516e-06		TTTGCGACCTCTATCAGACCTC	5.11639	10.7668	1.00627e-05	0.000808948		TTCTGGGATTGTTTATCTTGGT	-5.75836	5.62426	2.17441e-05	0.00226119		CCGCCCGTCGCTGCCCGGAA	-7.14454	6.08679	1.20014e-06	0.000119421		AAGAACTGCCTTATGAACTTTA	7.18921	1.6339	3.3004e-08	3.62269e-06		TATAAAGATGAAGTTTCGGAT	6.79912	3.90447	6.15863e-05	0.00557858		TGAGATCATGTTAGACTCATAC	-4.82479
AAACGGGGGCATTCGTATCGCTACGTTAGA	-8.79207	3.69574	1.7357e-09	1.86322e-07		GTAAGTTATAAAAAATAAGCGGTT	-8.62679	4.42081	1.75419e-06	0.000163764		GCAGTAATTTTGGTTGTCGGTGAAT	-9.51151	4.81145	2.30644e-08	3.08516e-06		GCTAAGGATCGTGTAAC	-5.89438	6.70494	1.00872e-05	0.000808948		CCCCCTGGAGGGCTCCA	-4.58868	6.26982	2.1819e-05	0.00226387		TTTGTAATTGGAAGAAAAGAA	8.50335	4.70051	1.20491e-06	0.000119423		TACTGTTATATTTATTGATCTC	7.18921	1.6339	3.29929e-08	3.62269e-06		GAAAGATCAGAGTTGTGTTT	6.79912	3.90447	6.15768e-05	0.00557858		TGAGATCATATTAGACCCATC	-4.88339
GGGAGACCTCCTGGGAACCGTTAGT	-8.81109	3.71289	1.74725e-09	1.8688e-07		TGGCGGTGTGGTTAGCTGGTTG	4.79915	3.98049	1.75924e-06	0.000163866		GTAAAACTTTTTCGATTATTGAACG	-9.45039	4.75136	2.30846e-08	3.08516e-06		ACTCCGGAGAGGGAGCCTGA	-8.4721	5.64338	1.01073e-05	0.000808948		TTAGTGGCG	8.87868	5.83958	2.1883e-05	0.00226464		TTTGCGACCTCTATCAGACCC	4.90081	6.96031	1.20558e-06	0.000119423		TGCCTTATGAACTTTAATTTC	7.18921	1.6339	3.29797e-08	3.62269e-06		TGGCAGAGTAGTTAGCTGGTTG	-4.74877	4.41369	6.18814e-05	0.00558838		TGGGTATGTTCTTCGTTCAAG	-6.0802
GAAATTCTTGGACCGTAGCGAGACGTCCTAC	-7.66309	5.70465	1.75266e-09	1.8688e-07		GTGAATAATGTTTGGATTGTAGACA	-8.67966	4.4697	1.77858e-06	0.000164192		GAGACCTCCTGGGAACC	10.3536	5.09768	2.29884e-08	3.08516e-06		CTGTGTCTGATTTCTGCCCA	-8.22461	5.42513	1.03759e-05	0.00082858		TACCCGTAGTCCAATGCCGTCA	-4.94402	6.89715	2.19248e-05	0.00226464		GGGCTTGATTGTCGTTTTGGTACACA	8.26356	4.47269	1.24658e-06	0.00012207		AAAGCAATTTCAGAACAGTCT	7.18921	1.6339	3.29711e-08	3.62269e-06		GATATTACTTTTGGTATTTAATTTGTC	6.91061	3.98638	6.32055e-05	0.00567208		GCCGCCATAGCTCAG	-5.85233
TCTTGGACCGTAGCGAGACGTCC	-6.3802	5.09844	1.75262e-09	1.8688e-07		GAATATAAACACAACGATTGTTCAGA	-8.6431	4.43592	1.77467e-06	0.000164192		TGAGATCAATGGGAATCTTCAA	-9.65108	4.94856	2.35311e-08	3.1291e-06		TTTGCGACTGTATTCACATCACT	5.63501	7.52431	1.04196e-05	0.000830214		GAACTGAGCAATATCGAGAGG	8.66641	5.64767	2.20453e-05	0.00226693		TCAGAGTCGTGTTTATGGGTA	8.26356	4.47269	1.24636e-06	0.00012207		TCTATATGTTGAGCATACTTTCTGAAC	7.4758	1.88617	3.31079e-08	3.62269e-06		GTCTAATTGTGATTGTTAATTGTTTCT	4.94904	4.58485	6.31614e-05	0.00567208		TGGGCTTTGCCCGCGCGAGT	-7.09522
TGGACCGTAGCGAAAC	-8.78102	3.68707	1.76014e-09	1.87259e-07		GATCATGTGAAGTTCTGTTCTGCTG	-8.62055	4.41505	1.76719e-06	0.000164192		AGTGAATGTTGCTTCGGTAATG	-9.63794	4.9356	2.35569e-08	3.1291e-06		TTTCGGTTCCGGGGGAAGTATGGTTGC	-8.15866	5.36895	1.06513e-05	0.000846777		GGTGAATTTAGGGACAGGT	-5.60781	4.98723	2.20282e-05	0.00226693		GTTATTATCATCCAACTGTACTTTTGT	8.26356	4.47269	1.24615e-06	0.00012207		TTCGGTTCCGGGGG	5.28564	2.10264	3.3263e-08	3.63153e-06		GCATTGACGATTTTCTTGTAGACTATT	4.94429	4.58147	6.32317e-05	0.00567208		GGTATTGAAATTCTGAACATTAACATT	-8.74819
TTCGGTTCCGGGGGA	-10.1912	7.69514	1.77031e-09	1.87921e-07		ATAGGAAATGAATCAGGAGAGA	5.32666	3.74978	1.77177e-06	0.000164192		TGGACCGTAGCGAGACGTCCTAC	6.59109	4.47026	2.35709e-08	3.1291e-06		TTTGCGACTGGATCCAGGCC	5.35785	6.15292	1.07359e-05	0.000849713		AGGTGAAATTCTTGGACCGTAGCGAGACG	8.52697	5.52542	2.22296e-05	0.00228079		CACTCCTTTTCGTTTGCTAATAT	6.27208	4.51061	1.25169e-06	0.00012207		CCCGTCT	5.65949	1.74362	3.3664e-08	3.66712e-06		AGGGGGTTGG	-4.26571	4.49392	6.37219e-05	0.00570332		AGGTTGGAGAATGAAA	-8.74819
GATACCGCCCTAGTTC	-8.76043	3.66695	1.77906e-09	1.8843e-07		CTGTGACCCGAGTGCAAATCTCGGTGGTGCCTCCA	-10.2299	5.93836	1.78626e-06	0.000164534		GGAGTTGAAAGAAGCATTGAAAAGG	-9.56215	4.86014	2.36659e-08	3.12916e-06		TGCCAGGGTCGCCA	-8.15371	5.36479	1.0724e-05	0.000849713		TGAGATCATATTAAACCCATCT	-4.38454	8.1518	2.23585e-05	0.00228612		GAAAGAACGAATGACCTTACAAGA	6.27177	4.51038	1.24542e-06	0.00012207		CTGGCACG	5.24629	2.06433	3.45935e-08	3.76001e-06		GATTGATTTGTATGATTGAAATATTGG	6.80664	3.90928	6.51324e-05	0.0057636		GATTTTTTTGTAGTTCGTTTTGAAGGTT	-8.95786
CCGGGCCGGACACT	-8.74075	3.64927	1.78996e-09	1.89164e-07		GTTGTACTAGAACTAATACTCGTTGTT	-8.65016	4.44177	1.84285e-06	0.00016937		CGACGTTGCT	9.71756	4.49396	2.36764e-08	3.12916e-06		GAAATATATATATAGGTTG	6.03211	7.01862	1.07841e-05	0.000851631		TCTCGGTGGAACCTCCA	-6.27823	4.92923	2.23808e-05	0.00228612		TTTGCGACTGTATCCAAAACCCGT	5.53246	5.50194	1.25132e-06	0.00012207		CTCCGGAG	5.1646	2.43371	3.52314e-08	3.82085e-06		AAGGAAGATTTTTTATTAGAT	6.80664	3.90928	6.51047e-05	0.0057636		TTTGCGACCAAATCCAGGCCACG	-6.13519
TTCTTGGACCGTAGCGAGACGT	-8.75867	3.66628	1.81055e-09	1.90614e-07		GTACATCTGTCTACTATAATATCTGTG	-8.59281	4.38956	1.86866e-06	0.000171363		GTTGGAATTTTGAGAGATGTTTAAA	-9.58094	4.87888	2.38939e-08	3.13015e-06		AATTGCGAATATATCCAGGTAG	8.59764	5.6658	1.10298e-05	0.000869107		TGACAGTGTAGTTAGCTGGTTG	-6.20989	4.81907	2.26745e-05	0.002311		CACGTCGGGTTCACCA	-4.87807	8.103	1.24437e-06	0.00012207		GCCTTGATGCCAGAGTGGTTAATGG	-7.39601	6.31041	3.55683e-08	3.84885e-06		TAGGGGCG	6.80664	3.90928	6.5077e-05	0.0057636		ATGCGAGG	-5.26395
AAATTCTTGGACCGTAGC	-7.43034	4.19367	1.81168e-09	1.90614e-07		GCACTGCTAGAACCATCATTTAACC	-8.5992	4.39544	1.87842e-06	0.000171877		GGCTGCACGCGCG	6.40912	4.30674	2.38935e-08	3.13015e-06		ACGGCGGGAGT	-4.53721	10.3909	1.11257e-05	0.000874732		GGGAGCCTGAGAAACGG	8.55319	5.54828	2.28552e-05	0.00231915		GTCGGAACCCGCTA	-8.35257	4.69071	1.26673e-06	0.000123264		AGCTTGACTCT	5.68135	1.76908	3.69011e-08	3.95801e-06		TGAGATCATGTTAGACTCATAA	6.7765	3.89001	6.53506e-05	0.0057636		GGAACTTCGAAGATCTTTGTAACT	-8.81156
ACTGGCACGGA	-9.15162	4.02747	1.822e-09	1.91033e-07		GTTTGATTGATTGTTCTTTGATTGATT	-6.3357	5.06491	1.9143e-06	0.000174775		GGCGACGTGGG	7.10149	5.89109	2.37389e-08	3.13015e-06		GATGTCCGGGGCTGCACGCGCG	-6.87009	6.78807	1.12121e-05	0.00087958		GCGTGTGGGAGGGATGCGTTCGCGCACTCTCCCGA	-6.16584	4.8224	2.28147e-05	0.00231915		GTGTTTGG	5.19147	5.91093	1.26957e-06	0.000123269		TTTGAAACTTCATCTTTGTAG	7.11198	1.56988	3.71435e-08	3.95801e-06		GATACTATCTGACCTTTTTGAAACA	6.7765	3.89001	6.5375e-05	0.0057636		GGCGGTT	-6.01856
TTAGTACTTGGATGGGAGACCTCCTGGGAACCGTTAGT	-8.8276	3.7279	1.82368e-09	1.91033e-07		TGGCAGTGTAGTTAGCCGGTTG	4.61631	3.60671	1.92684e-06	0.000175533		AGGTCTGTGAT	7.36359	4.38841	2.38439e-08	3.13015e-06		GGCAGTGTGGTTAGCTGGTTG	8.77318	5.83332	1.14305e-05	0.000894747		TTCACCGGGTAGACAAACGCGCG	-4.6214	5.86525	2.30233e-05	0.00233107		GATTACGTCCCTGCCCTTTGTA	-5.59286	6.66668	1.27818e-06	0.00012356		GCCGGCGCGG	7.11198	1.56988	3.71133e-08	3.95801e-06		GAACTTATCTTAACTTTGTTTAATCTGG	6.7765	3.89001	6.53993e-05	0.0057636		ACTTTCTGAACT	-6.20483
AAGTCTTTCGGTTCCGGGGGA	-7.25302	4.79545	1.86944e-09	1.95398e-07		GTTGATAAGTAACTAACCATTGTTGGC	-8.59198	4.38899	1.96659e-06	0.000178421		GAAGTTGATTTATCTTGGAATTGTATT	-9.56496	4.8633	2.39944e-08	3.13642e-06		ATTCTTGGACCGTAGCGAGACGTCCT	-5.14367	7.86644	1.14847e-05	0.000897012		AATAAGATAGGATAAAAAGTCTATTGGGTTC	-8.41961	5.20033	2.31128e-05	0.002335		TTACGTCCCTGCCCTTTG	-6.49947	5.4873	1.27804e-06	0.00012356		TATAAAGATGAAGTTTCGGATAT	7.11198	1.56988	3.70712e-08	3.95801e-06		GCTGGTTG	-6.84726	3.72339	6.5338e-05	0.0057636		TTTGCGACCGCATCCAGGCCACG	-6.13953
ATTCTTGGACCGTAGCGAGACGTCCTA	-7.44723	4.21013	1.89805e-09	1.97954e-07		GTAATTTGAGATAATTTTGTAGAAC	-8.58969	4.38643	1.96715e-06	0.000178421		GATATTGTAGCCAACTGAAATAAGGC	-9.44805	4.74935	2.43582e-08	3.15763e-06		ACACCGCCCGTCGCTGCCCGGAACT	-6.01521	7.35914	1.16474e-05	0.000907736		AATGCACCGGATCCCGTCC	8.59169	5.5819	2.3616e-05	0.00235997		TGATTACGTCCCTGCCCTTTGTA	-5.87056	5.7345	1.28736e-06	0.000124175		TCTGAAATTGTTTTTAATCTA	7.11198	1.56988	3.6993e-08	3.95801e-06		GTTTCTTATCAACTTATCTGGATCGTC	6.84488	3.9444	6.61065e-05	0.00580275		TGAGATCATGTTAGACTCATACC	-6.20693
AAAACAGCGGGGAAA	-6.84895	5.24377	1.9074e-09	1.98494e-07		GTTCTGTTATGTAGGATTTGGAATCTT	-8.58089	4.37788	1.98308e-06	0.000179199		GAGATATGATGGTATGATCTGTAGTC	-9.43027	4.73181	2.43685e-08	3.15763e-06		AACACATGTGTTGA	-8.31898	5.50728	1.16846e-05	0.000908645		GACCTCCTGGGAACC	8.55524	5.55002	2.35658e-05	0.00235997		TGGCAGTGTGGTTAGCTGGTT	6.2193	4.46163	1.2917e-06	0.000124322		TTTTTTCGGTTGACT	7.11198	1.56988	3.69378e-08	3.95801e-06		GTTTTTTGGATATTTTGAAATGTAGTT	6.84488	3.9444	6.61324e-05	0.00580275		TTTCACCTGTCTTTCCAAGA	-8.77835
GTTGACTTGAACTGTTGTGGTAACT	10.2654	5.66345	1.9174e-09	1.99101e-07		GGGTTTCACGTC	4.81965	2.53797	1.98438e-06	0.000179199		GAAAGTCTTTCGGTTCCGGGGGAAG	6.85037	3.91558	2.42458e-08	3.15763e-06		TTTGCGACTGGATCCAGGCCA	5.07495	8.59906	1.17882e-05	0.000914703		TGAGATCAATGGGAATCTTCA	-4.46994	7.06802	2.3588e-05	0.00235997		ATCCGCGCCTGTCACG	-8.49016	4.81106	1.30432e-06	0.000125263		AATCGTGTCGGTG	7.11198	1.56988	3.68441e-08	3.95801e-06		GAATATGTATATACTGTAGATTGGAAG	6.76772	3.87901	6.64275e-05	0.00580331		GATAGCAAGTCCATTGTAGATATTGTC	-8.90121
GTCTTCATATTTTGAGTCGCGCGAA	10.2121	5.61145	1.98279e-09	2.05442e-07		GATAAAAAGCTTCTTGACTGATGAG	-8.59458	4.3903	2.01328e-06	0.00018102		AGGTGAAATTCTTGGACCGTAGCGAGACG	8.67365	3.53844	2.42735e-08	3.15763e-06		AAGTCTTTCGGTTCCGGGGGAAGT	-5.89998	6.70949	1.18479e-05	0.000917339		AGGTTGGAGA	-5.55832	4.94056	2.35737e-05	0.00235997		AGGGTTCGACTCCGGAG	-6.20129	6.04333	1.3084e-06	0.000125382		TGAGATTCTCTTTTCTTCATT	4.13269	4.99955	3.75685e-08	3.98853e-06		GTTTGATATACAGTCTTGAAGTAGAATT	6.76772	3.87901	6.64031e-05	0.00580331		GTAAATATCTGGCCAGTTGTTTATGAC	-8.78049
GTTCCGGGGGAAG	-7.43048	4.19433	1.99926e-09	2.067e-07		GTAGGCTGGCGTA	5.26635	2.22485	2.00974e-06	0.00018102		GAAAAACAACAAACTAATTAAAGGCA	-9.64975	4.94714	2.4669e-08	3.18963e-06		TACGTCCCTGCCCTTTGTAC	-5.52511	7.82372	1.1881e-05	0.000917902		ATTAAGAAGTATTATCGGGGT	-8.06327	4.8462	2.35418e-05	0.00235997		GATTTCGTCGTGTAGTCGGTTATCACATCTGTCTGA	5.93694	5.00926	1.31865e-06	0.000126089		TATTCTGAAATTGTTTTTAAT	7.35043	1.76658	3.7593e-08	3.98853e-06		GTTCTGTAGAAATACTGTTTGATGTCT	6.81497	3.91988	6.8274e-05	0.00589015		TTTGCGACTGTATCCAAACTAC	-6.69007
ATTGACGGAAGGGCACCACCAGGAGT	-8.87607	3.77205	2.00579e-09	2.06927e-07		GTTATGACTGTATTCATATCTTTGTCC	-8.65	4.44213	2.03355e-06	0.000182447		GTAAAACTCTCCGTTGATGGCAAAA	-9.62013	4.9173	2.52257e-08	3.19855e-06		AGCAGGGCGGTG	-6.28426	6.23041	1.20139e-05	0.00092616		TACCCGTAGCCCAATGCTGTCA	-4.40468	6.95311	2.37242e-05	0.00236564		ATCTTTGTAGATGTATTTTAA	8.41205	4.61347	1.32585e-06	0.000126504		AAAGGGTTTCACGTC	5.42801	1.55704	3.81893e-08	4.0256e-06		CTAAAAGCAATTTCAGAACAGTC	6.81497	3.91988	6.82977e-05	0.00589015		GCCTCCGTGGCGCAATCGG	-4.53715
GTGAACTGTATGGCGATGTTTAACA	10.2352	5.6342	2.07087e-09	2.13178e-07		GCATACGTCGACGCTTCTTGTGAAT	-8.69077	4.47839	2.05337e-06	0.00018254		TACTGGCCTTCAAACTTCTTAACT	-9.54451	4.84319	2.49014e-08	3.19855e-06		ACGTCCCTGCCCTTTGTAC	-8.4843	5.65383	1.20607e-05	0.000927761		TGGACCAGGG	8.91733	5.87444	2.38932e-05	0.00236697		TCAAATGGTGTTAACTGTGGTAACTTAGGGAA	5.91888	4.99206	1.33238e-06	0.000126852		GTCTTACGCTCATTTCC	5.42801	1.55704	3.81446e-08	4.0256e-06		GTTAAATGTGGAGACTGTTGGACAATT	6.81497	3.91988	6.83214e-05	0.00589015		GACCTGATCGTTTTGGTACTTTAACCT	-8.71572
AGTCTTTCGGTTCCGGGGGAAG	-8.83441	3.73376	2.10623e-09	2.16352e-07		GAAATCTTAACTATATCAGAGGCTGAG	-8.59215	4.38812	2.05661e-06	0.00018254		GGATTTATTTCTTCACCTATTGTCGCT	-9.53312	4.8328	2.51157e-08	3.19855e-06		GAGAGGCCCCGGT	-5.55648	6.40422	1.21471e-05	0.000932395		CCCTTAGATGTCCGG	8.51787	5.51741	2.38877e-05	0.00236697		GAAGTTGTTTTATCTCTGTAGTTAATT	6.70491	4.9829	1.33679e-06	0.000126998		GCGGAGGAAA	5.60665	1.67538	3.80831e-08	4.0256e-06		GAAAAAAATATTTCGGGCAGTAGAAA	6.81497	3.91988	6.83276e-05	0.00589015		TGTGACCGTTATAACGACTATTC	-8.87203
CGATAAACGCACCA	-5.66249	5.75418	2.21615e-09	2.27153e-07		GGAAGACAGCATGAGATCGAGAAGA	-8.56294	4.36201	2.05439e-06	0.00018254		GAGTCATTCTCTGAACTAACCTTGTT	-9.52219	4.82195	2.50864e-08	3.19855e-06		CAGGGCGGTGGC	-6.26529	6.21306	1.22122e-05	0.000935376		TAAATGCATCTCACTAGCACAAA	-4.82435	5.66324	2.3943e-05	0.00236697		GGGTTCGATTCCCGATAAACGCACCA	-6.25271	6.09054	1.34301e-06	0.000127315		AGGTCTGTGATGC	5.14364	1.97515	3.92178e-08	4.12512e-06		GATTGATTGTTCTTTGATTGATTGTTC	6.81497	3.91988	6.83339e-05	0.00589015		AGTTGCGAGCTATCTTAGTACTTG	9.40901
GGTTCCGGGG	-6.91085	4.97808	2.25254e-09	2.30388e-07		GTCTTACGCTCATCTCC	5.02815	3.12579	2.04711e-06	0.00018254		GTTGAAAGTGTATGTATAGTCTGAT	-9.44499	4.74631	2.51979e-08	3.19855e-06		TTACGTCCCTGCCCTTTGT	-6.14786	7.88636	1.23091e-05	0.000940771		ATATATATAGGTTGGAGA	-8.38238	5.16349	2.39313e-05	0.00236697		GACAAAGATTTGTTGAAGATTGAACTT	6.21931	4.46155	1.34628e-06	0.00012735		TGGAAGTCGGAACCC	8.91056	3.25858	4.00656e-08	4.20526e-06		GGCGGGGA	3.46517	5.77759	6.75957e-05	0.00589015		GGCCTGGTTAGTCGCAAAGA	-5.23315
AGACCTCCTGGGAACCGTTAGT	-9.074	3.95488	2.26385e-09	2.31049e-07		GGTGAGTTTAGGGACAG	6.87803	2.19169	2.05267e-06	0.00018254		GAACTTGATAATCGAAGATGATAATGG	-9.43932	4.74086	2.51277e-08	3.19855e-06		GGGTTATTTTAAAACTTAGATTTG	10.6247	7.64666	1.24556e-05	0.000949931		GGGCATTCGTATCG	8.47094	5.47677	2.42144e-05	0.00238328		GACTTCAATTGAAATTTTTGATCTTCC	8.23709	4.44774	1.35541e-06	0.00012794		TGCAAGACGTTCTATATCTCT	5.55465	1.661	4.053e-08	4.22678e-06		TGGCAGTGTAGCTAGCTGGTTG	-4.43331	5.00483	6.84475e-05	0.00589015		CA	-4.87924
ACACACCGCCCGTCGCTGC	-9.0859	3.96595	2.2742e-09	2.31609e-07		TGGACCGTAGCGAGACGTCCTACT	4.54366	3.33579	2.0757e-06	0.000183841		GATGTCCGGATTATTGTGTAATTTATT	-9.43276	4.73445	2.49685e-08	3.19855e-06		AAATTCTTGGACCGTAGCGA	-5.8557	6.69112	1.25032e-05	0.000951526		ATGTCTGGCGG	5.81692	6.13239	2.42632e-05	0.00238328		TATAATGAAGAATTATCGGTTTTACCCCTGATA	8.28924	4.49699	1.36137e-06	0.000128034		GATCCCGTCC	5.55465	1.661	4.05208e-08	4.22678e-06		CGGGCTTATCTTTT	4.26134	4.75925	6.85997e-05	0.00589063		TGAAAGACGTTCTATATCTC	-4.99412
ATTGACGGAAGGGCACCACC	-8.72987	3.63825	2.29961e-09	2.33697e-07		GGCACGGACAAGAGGAATCC	5.51813	2.41337	2.0843e-06	0.000184209		GTCGCGATGGCCGAGCGGTCTAAGGC	-6.56076	7.55972	2.52746e-08	3.19855e-06		TCCGCGCCTGTCACG	-8.20915	5.41093	1.26298e-05	0.000959108		TATCACAGTTGATTTGAATTCGT	-6.53679	5.13796	2.42119e-05	0.00238328		TTTGTAATTGGAAGAAAAGAAA	8.28924	4.49699	1.36222e-06	0.000128034		ACCTTCTGATCCCT	5.55465	1.661	4.04845e-08	4.22678e-06		GAATTTAGGGACAGG	-6.79323	3.67711	6.89439e-05	0.00590757		GTCAATTTCATCTCGTCAATTCCTGGT	-8.74874
GGATCCCGTCCGATCTCC	-9.49579	4.35803	2.30762e-09	2.34013e-07		GCGTTGATGGTTAAGTGGTATAATTCT	-9.82271	5.54401	2.09687e-06	0.00018441		AGAAGACCCTGTTG	6.97971	4.04202	2.4813e-08	3.19855e-06		GGTGAATTTAGGGACAGGTCTTCTAAACTTGTTTTGAGCTAGTAACTC	8.31572	5.39934	1.27009e-05	0.000962461		CATCG	-6.13125	5.58019	2.43951e-05	0.00239114		AGGGTTTCACGTCA	-4.61747	9.95054	1.38262e-06	0.000129675		CGGGCT	5.22366	3.17911	4.08627e-08	4.25242e-06		GGTGAATTTAGGGACAA	-4.44445	4.16756	6.98136e-05	0.00596936		GCTCTTATAAGACAATCAAATCGTGTT	-8.74874
GAAAGTCTTTCGGTTCCGGGGGAAGTATGGTTGC	-7.87207	4.55489	2.31315e-09	2.34075e-07		GGATCTATTTTCTCGATCAGAAGGCTA	-8.58313	4.38091	2.0983e-06	0.00018441		AAGGAGTGTAT	8.54701	3.42648	2.5152e-08	3.19855e-06		TGGCAGTGTGGTTAGCCGGTTG	8.28728	5.37265	1.27671e-05	0.000962814		ACTGTT	-5.03885	5.32134	2.45627e-05	0.00240245		ATTGACGGAAGGGCACCACCAGG	-8.44474	4.77087	1.3898e-06	0.000130072		TCGGTTCATAGGT	5.58589	1.68356	4.14304e-08	4.30234e-06		GAAACTCTGTGAGAAGTTGCGACA	6.81422	3.91408	7.10516e-05	0.00606232		GTTGATATAATACCACATTTACTCTGA	-8.74874
GATGTCCGGGGC	-8.70061	3.6133	2.34644e-09	2.36941e-07		TGGAAGTGTGATTAGCTGGTTG	7.123	2.38463	2.09992e-06	0.00018441		GAACATTTATATCGTTAAAGTCCAGT	-9.57632	4.8753	2.53577e-08	3.20227e-06		ATGCACCGGATCCCGTCC	-5.38519	7.45243	1.27635e-05	0.000962814		ACAGCTTACCAAATTGCCATC	-8.10026	4.884	2.46218e-05	0.00240313		ATCATTTTATGATTGCGTTATA	8.26335	4.47253	1.40036e-06	0.00013023		CGCCCGTCGCTGCCC	7.18197	1.62819	4.35334e-08	4.49495e-06		TAAGGCACAATATCGGCATCTCT	-4.04197	4.64587	7.13285e-05	0.00607305		ATAGGAAATGAATAAGGAG	-5.62953
ATGTCCGGGGCTGCACGCGCGCT	-6.67487	5.38166	2.35877e-09	2.37682e-07		TGGCAGTGTGTTTAGCTGGTTG	4.44263	2.96906	2.12222e-06	0.000185214		GACTAATCGAACCATC	8.9074	3.7476	2.54258e-08	3.20408e-06		TGTGTAGGCTGGC	-8.09203	5.31026	1.27867e-05	0.000962814		GATATGTCTGGTATTCTTGGGT	-5.38005	5.29466	2.48149e-05	0.00241685		CACTTCGTCCTGAAAAGACAGG	8.23704	4.4477	1.39945e-06	0.00013023		TATCCATAAACACCACTCTGAT	7.18197	1.62819	4.35315e-08	4.49495e-06		GCATTATTTGCTTGGATATCGTCTGCA	6.76878	3.88518	7.24459e-05	0.00614216		GATACGTTCATTAAGGCAATCTTCGTCT	-8.81183
CGGGCCGGACA	-6.41071	5.37887	2.40783e-09	2.42114e-07		GGTGAATTTAGGGACAGGTCTTCTAAACTTGAA	5.2368	2.23415	2.12159e-06	0.000185214		CCAGGAGTG	8.9501	3.78613	2.55084e-08	3.20771e-06		TGGCAGTGTGGTCAGCTGGTTG	8.12984	5.22619	1.28858e-05	0.000966188		CGAATCCTGCTGGCTGCGAATACTCTTT	-8.05838	4.84218	2.4875e-05	0.0024176		ATGGGAGACCTCCTGGGAACCGTTAGT	-8.84369	5.12766	1.3995e-06	0.00013023		TTGATTACGTCCCT	7.27916	1.707	4.35608e-08	4.49495e-06		GAAGACTTGACCAGTAGATGATATGAT	4.97206	4.60166	7.24187e-05	0.00614216		GAAGTATTAATTTTAGAATTTTCGGTT	-8.98562
AAGTACTCCGGAG	-9.00047	3.88658	2.42283e-09	2.43109e-07		TTTGGCACCATGGAACTCTAAT	5.23685	2.23413	2.12248e-06	0.000185214		GCATTTGTCGTAGAATCTCGGTACA	-9.53206	4.83069	2.59734e-08	3.25931e-06		ACCCGGGGG	-8.08687	5.30594	1.2864e-05	0.000966188		CAAGGCCCGG	6.00809	6.30512	2.51438e-05	0.00243858		AATCGCTGTTGTTTGAACCGGGCAAAA	-8.30719	4.65068	1.40744e-06	0.000130614		TCCGGCC	5.28423	2.90725	4.37681e-08	4.50683e-06		GATAAATAGTCTTTTGGATCGTCAGGT	4.90475	4.54806	7.27943e-05	0.00614576		GCGCCTGTCACGTGCGAGACCG	6.74909
AGGGTTCGACTCCGGAGAGGGA	-8.89626	3.79025	2.43844e-09	2.44162e-07		GTTTTTGATTGCGAATTTTAGTAGT	-8.6142	4.40922	2.14636e-06	0.000185219		GCGATATTTACAAGCAAATCCTTCG	-9.86483	5.15791	2.60653e-08	3.26396e-06		AGTCTTTCGGTTCCGGGGGAAGTA	-6.24337	6.19307	1.29737e-05	0.0009687		GCTAGCTGGACCAG	5.11098	6.33669	2.55244e-05	0.00246478		TGAGATCATATTAGACCCATC	4.52414	8.5035	1.41337e-06	0.000130889		ATAGAATGTATGACTTCTAATCATAAGGTCCTCGG	5.64289	1.70785	4.39081e-08	4.51174e-06		GGGTTATTTTAAAACTTAGATTTG	-6.20951	7.02593	7.26739e-05	0.00614576		TTGCACGATTTACATACTC	-6.20541
TCGAAGGCGATCA	-8.67125	3.58562	2.45039e-09	2.44843e-07		GCAACTGTTGCAGCTTTTAACGATGGT	-8.58816	4.38438	2.14639e-06	0.000185219		CTCCTGGGAAC	8.44375	3.33597	2.63222e-08	3.28923e-06		CTGCCCGGAACTGAG	-8.17595	5.38573	1.2954e-05	0.0009687		GCCA	-4.93139	6.51275	2.54765e-05	0.00246478		TAGGAACAAACGGGGGCATTCGTATCGCTACGTTAGA	-8.37974	4.72358	1.42147e-06	0.000131362		TCGAGTCCCATCGGAATCGTTGACCTTTT	5.71873	2.49795	4.42897e-08	4.54141e-06		GACAAAATTTGTCTGTGACGTGAACT	6.9095	3.99651	7.47917e-05	0.00623505		CACGCGGGAGTCCCGGGTTCGATTCCCGGTCAACGCACCA	-6.93315
AAAGTCTTTCGGTTCCGGGGGA	-9.02128	5.73292	2.45746e-09	2.45037e-07		GGCATAGTCTCTAACTCTTGAAACT	-8.58335	4.38008	2.14746e-06	0.000185219		GGTGAAATTCTTGGACC	6.51845	4.40282	2.64039e-08	3.29254e-06		AGTACTCCGGAGAG	-4.97965	7.50632	1.30705e-05	0.000973885		TACCCGTAGTCCAATGCTGTAA	-5.04183	7.08519	2.55745e-05	0.00246478		GTTAGAGGTTCGAAGGCGATCAGATACCGCCCTAGTTCT	-8.42569	4.76477	1.42494e-06	0.000131407		TGCGATCATATTAGACCCATCT	4.97884	1.78822	4.51246e-08	4.61734e-06		GTATTGTTGTAATTTTGATCTAGTGGC	6.77554	3.88389	7.47001e-05	0.00623505		CTTGGCATGGGAGAGGGCTGG	6.52985
TGGGGCGGTACATC	-8.68194	3.59562	2.46906e-09	2.45679e-07		GGGCTTGATTGTCGTTTTGGTACAGA	-8.58092	4.3779	2.13378e-06	0.000185219		GAGATGTAGAGACCAAATAACGACT	-9.46923	4.77042	2.68494e-08	3.32427e-06		TCACCGGGTGAACAAATTCTC	-6.26576	6.2257	1.31492e-05	0.000976283		ATTTTTGGAAGGCCGAGAGGCCTGAT	-6.15574	4.81426	2.56846e-05	0.00247023		GAGGCACTGGTATCTTCGGATGCGAGGGTTCGAATCCCTCTCTCGTCACCA	6.41977	4.64771	1.46393e-06	0.000134482		TCGAATCCTGCCAGGATCGTTACCTTT	5.06181	2.6637	4.61655e-08	4.70834e-06		AGAAAGATCAGAGTTGTGTTTA	6.75233	3.86924	7.45257e-05	0.00623505		TTTGGGATCGAATTAACCAA	-5.57369
GGGCTTGATTGTCGTTTTGGTACAAA	10.4717	5.86563	2.53123e-09	2.5134e-07		GAAAGAACGAATGACCTTACAAGAACA	-8.55226	4.35212	2.13891e-06	0.000185219		ATGTCGGCTCTTC	8.65334	3.52042	2.68891e-08	3.32427e-06		TTAGATGTCCGGGGCT	-8.10706	5.32458	1.31575e-05	0.000976283		CGAATCTGACAATA	-6.76939	5.35256	2.64167e-05	0.00253534		TTCGTTGTTACTGAAACTCGTCC	6.29787	4.53408	1.46438e-06	0.000134482		TGAAACCGCGGAAA	5.6199	1.71582	4.62064e-08	4.70834e-06		GTATCCAATAGCTTTCGTTGTTTTTAAAA	6.75233	3.86924	7.44985e-05	0.00623505		ATTGGAAGAAAAGAAAGATCA	-6.84566
TGCCCGGAACTGA	-7.66334	4.42279	2.55176e-09	2.52852e-07		GCTAGATTCTGTAGCTCCAGGTGCTT	-8.54982	4.34995	2.15381e-06	0.000185219		GTGACGGATAACG	8.66339	3.52935	2.69373e-08	3.32427e-06		CTCCGGAGAGG	-8.1227	5.33594	1.3192e-05	0.000976813		TTTGCGACTGTATTCAAACTACG	-4.57049	7.684	2.65049e-05	0.00253852		TTCTTGGACCGTAGCGAGACGTCC	-6.3887	5.38672	1.48714e-06	0.000136289		CCGGGGGAA	5.08877	1.92845	4.8226e-08	4.90391e-06		GAACTTGATAATCGAAGATGATAATGG	6.74466	3.86434	7.49098e-05	0.00623505		TCCGATGGTCTAGTGGTTAGGATTTGTGGCTC	-6.17819
ACACCGCCCGTCGCTGCC	-7.64184	4.39213	2.60131e-09	2.57227e-07		TGGAAGTGTGGTTAGCTGGTTG	5.54806	2.47884	2.15101e-06	0.000185219		GTTAGTGGC	8.91601	3.75536	2.67663e-08	3.32427e-06		TACGTCCCTGCCCTTTGTACACACCGCCCGTCGCT	-6.34982	6.28981	1.33657e-05	0.000985577		TTGTTAATATCAAAGGCG	8.82478	5.78786	2.67002e-05	0.00255141		GAATAGTTTCTGTAACCTGATAAAGTT	5.86328	4.93922	1.49463e-06	0.00013669		TTGAGATCAATGGGAATCTTCAAA	4.89121	4.29057	4.98445e-08	5.05798e-06		GATTCTGATGTAACTGAATATTCTGGA	6.74466	3.86434	7.49379e-05	0.00623505		AGAGGCAGG	5.88446
GTCGGAACCCGCTA	-8.70175	3.61248	2.60921e-09	2.57475e-07		GTCATCATAGGCCAAGTAGTACAAG	-8.60487	4.40036	2.17479e-06	0.000186635		GTCCGATCTCCG	8.91601	3.75536	2.67911e-08	3.32427e-06		CCGGGGCTGCACGC	-8.10928	5.3241	1.3346e-05	0.000985577		AATATCTGAATTGTTTACAAG	-4.87586	6.38087	2.67503e-05	0.00255141		TCCGGGGGAAGT	-4.72759	7.83168	1.49911e-06	0.000136817		TCTATATGTTGAGAATACTTTCTGAA	4.6072	1.94725	5.02483e-08	5.0884e-06		GAGATCATATAATTCACTAATATTGTC	6.7119	3.8381	7.47004e-05	0.00623505		CGAATCTCGTCCCAAACGGATTGTTTT	-6.87622
CCGCCCGTCGCTGCCCGGA	-9.52381	4.38474	2.61746e-09	2.57755e-07		GCGGGTTTAAGTTAA	5.10436	2.6965	2.19813e-06	0.000188249		GAGCAATATCATTTCTGTAGGAGGC	-9.40776	4.70973	2.70302e-08	3.32884e-06		GAAATTCTTGGACCGTAGCGAGACGT	-8.16306	5.37435	1.35946e-05	0.00100038		AGGGAACGTGAGCTG	5.0846	6.31316	2.68878e-05	0.00255923		GAACTGTATATTTTACTCTCTTAATATT	5.78585	4.86576	1.53809e-06	0.000139795		CACCGCCCGTC	4.66148	1.99339	5.04392e-08	5.09717e-06		CCGTCGGAGTCGGCTTT	4.35557	4.86011	7.53036e-05	0.00625253		GTTCTGTTATGTAGGATTTGGAATCTT	-6.87622
CTCCGGAGA	-6.95015	6.51589	2.63428e-09	2.58877e-07		GTTCACAAATTTGATGGCTTTCGTC	-8.5374	4.33834	2.20416e-06	0.000188376		TGAGCTATGATGTAACTATAATGAGCCTGATCTATTTGATGTGAATTCCGCTTCTGAGCTCT	-9.49396	4.79337	2.71371e-08	3.33512e-06		TGGCAGTGTGATTAGCTGGT	8.345	5.42673	1.36944e-05	0.00100499		ATAGGAAATGAATCAGGAGAGAA	-5.18226	5.77522	2.71121e-05	0.00256488		TAACCGGATATATTTGACTA	5.05704	7.17845	1.53779e-06	0.000139795		TGAGATCATGTTAGACTCA	4.50891	4.06225	5.11135e-08	5.1473e-06		AATCGATTGTCTGTAACAAAATGACATT	6.80736	3.91512	7.68787e-05	0.00635705		GTTGTATTCTCTTGATTAGTAGCGGGT	-8.68249
GAGACCTCCTGGGAAC	-9.17902	4.05896	2.66702e-09	2.61554e-07		TGGCAGTGTAGTTAGCTGGTCG	5.10337	3.8757	2.23346e-06	0.000190487		GTGTTAGTGAGAACGTTTGTGATGT	-9.45177	4.75256	2.73447e-08	3.35372e-06		CGCCCGTCGCTGCC	-5.22078	6.99584	1.38127e-05	0.00100499		TGGCAGTGTAGCTAGCTGGTTG	-5.18226	5.77522	2.71142e-05	0.00256488		GCACCTTCTCGGAAAC	-5.72019	5.60095	1.55725e-06	0.000141245		GGCGACGTGGGA	4.89658	3.48525	5.11457e-08	5.1473e-06		GTAATATTCGGAAAGCGTTTTT	5.00512	4.60161	7.68344e-05	0.00635705		GAATATCATTCTGGATCTGTTTTAGTT	-8.78077
TTACGTCCCTGCCCTTTGT	-7.61763	6.03955	2.68282e-09	2.62564e-07		AATAAGATAGGATAAAAAGTCTATTGGGTTC	5.73599	3.22748	2.24533e-06	0.000191107		GCACAGAGTGTAACAATGGAGTCGTA	-9.63137	4.92767	2.74082e-08	3.3546e-06		GTCTTTCGGTTCCGGGGGAAGTATGGTTGCA	-8.07311	5.29386	1.38179e-05	0.00100499		CAAAT	-6.28244	4.9331	2.70467e-05	0.00256488		GCTCGATCGCATCTTATTGTTTCTGGT	8.2103	4.42249	1.57293e-06	0.000142374		AGGGTTTCACGTC	5.87702	2.6344	5.30875e-08	5.33175e-06		GCACGTGGATTTTCCGACTGGAAACTT	6.83719	3.9397	7.82151e-05	0.00644344		ACTTGAACCATCTGTAATGGCCTACAC	-8.71628
AGCAGGGCGGTGG	-8.76695	3.67168	2.70946e-09	2.64628e-07		GAAAATCTTGTTTGGCCTGTATAGT	-8.60955	4.40454	2.25794e-06	0.000191786		GTAATTCTAATACGGTCAATGTTCT	-9.45684	4.75829	2.76717e-08	3.36305e-06		ATTGACGGAAGGGCACCACCA	-8.08537	5.3035	1.37489e-05	0.00100499		CGAATCCTGCTGGCTGCGAATACTCTTTT	-5.43358	4.82665	2.719e-05	0.00256678		TTTGCGACTAAACCTAGAT	9.70687	5.87151	1.57915e-06	0.000142623		TGAGATTCTCTTTCCTTCATTCA	5.50466	1.59577	5.33538e-08	5.34164e-06		CAAGGTAATTTCATAGTCATG	6.83719	3.9397	7.82441e-05	0.00644344		TCTTTTTGATGAGACTTTTTGACTGAGGA	-8.71628
GCCAATTGATCGTCATCTGTGTAGA	10.1041	5.50608	2.84426e-09	2.77225e-07		GTATATTTTGTTGGTTTGTTAAAAT	-8.55472	4.35432	2.27658e-06	0.000192974		GAATATAAACACAACGATTGTTCAGA	-9.43121	4.73324	2.77308e-08	3.36305e-06		ACTCCGGAGAGGGA	-8.11439	5.32837	1.38457e-05	0.00100499		TTGGCATGGGAGAGGGCTGGG	6.17576	6.43026	2.73798e-05	0.00257941		TTTATAAAGATGAAGTTTCGGA	8.23694	4.44762	1.58215e-06	0.000142623		GCACCGGATCCC	5.50466	1.59577	5.34044e-08	5.34164e-06		GATTTGGACTTCATTATTGCGAAG	6.71977	3.84306	7.91025e-05	0.00646116		CTGT	-4.55143
GTTGGGCTTTGCCCGCGCG	-6.76209	4.33372	2.85946e-09	2.78138e-07		GGAATTTTGAGAGATGTTTAAGGGC	-8.55304	4.35317	2.28217e-06	0.000193053		TAATTTTTTGTTATATATATATTAGGATTGCATCCTATT	-9.39542	4.69805	2.76078e-08	3.36305e-06		ACAGCAGGGCGGT	-8.11439	5.32837	1.38547e-05	0.00100499		AAGGGAACGGGC	8.44017	5.44989	2.79362e-05	0.00261047		TACGTCCCTGCCCTTTGTACACACCGCCCGTCGCT	-6.50734	5.49412	1.58741e-06	0.000142805		AAGAAAAGAAAGATCAGAGTTG	7.36286	1.78588	5.35349e-08	5.34377e-06		GTATCCAATAGCTTTCGTTGTTTTAAA	6.71977	3.84306	7.90832e-05	0.00646116		GAACTGTAAACCTGCCTTAACAGATTT	-8.90147
AGCTCGTAGTTGGAT	-6.28044	4.70535	2.89043e-09	2.80577e-07		GGCGGAATGGCCGAGCGGTCTAAGG	-6.99447	8.74053	2.28911e-06	0.000193246		GGGGATATAGCTCAGTGGTAGAGCATGTGACTG	-7.71062	10.5102	2.77593e-08	3.36305e-06		GGGGCTGCACGCG	-8.1154	5.33214	1.38274e-05	0.00100499		CGTTAGTGGC	8.43881	5.44903	2.79317e-05	0.00261047		AAAGTCTTTCGGTTCCGGGGGAAGTA	-6.035	5.89212	1.62051e-06	0.000145486		AACATTTTCAGTAGTCAAAC	7.20461	1.64535	5.43596e-08	5.40468e-06		GTAATATTCGGAAAGCGTTTTTTAA	6.71977	3.84306	7.90639e-05	0.00646116		TTTGGGACCTGTGTTTAAGTT	-4.73028
CGAAAGTCTTTCGGTTCCGGGGGAA	-8.90062	3.79401	2.98979e-09	2.88623e-07		GGTTTGGAACTTGGATGAGGGAGTCT	-8.5842	4.38065	2.29884e-06	0.000193672		ATCGCTGTTGT	8.43181	3.32555	2.75995e-08	3.36305e-06		CTCCCTTGGCATGGGAGAGG	8.12208	5.21962	1.39348e-05	0.00100874		TGGCAGTGTGGTTGGCTGGTTG	-5.93633	9.27714	2.78491e-05	0.00261047		GGTACGTGAGGATAGAGCTGT	6.16494	4.41106	1.63056e-06	0.000146091		GAAACCGCGGAAA	7.20461	1.64535	5.43661e-08	5.40468e-06		GCAAAATTTCTGGCTAACACGGACAACT	6.71977	3.84306	7.90446e-05	0.00646116		GTCGCTGCCCGG	6.23168
TGGATGGGAGACCTCCTGGGAACCG	-8.90062	3.79401	2.98162e-09	2.88623e-07		GTATTTTTTGTCAATATCTTCTTCG	-8.77876	4.56192	2.33072e-06	0.00019375		GATCATGTGAAGTTCTGTTCTGCTG	-9.41012	4.71251	2.79725e-08	3.38007e-06		GTTGTTTGAACCGGGCAAAA	-6.30467	6.26366	1.40006e-05	0.00101145		GGAGGTTTCTGACCCTTCTGAGTTTGATAATGG	-6.15043	4.81019	2.78364e-05	0.00261047		TGGACCGTAGCGAGACGTCCT	-4.9942	6.74072	1.63556e-06	0.000146242		TACCTCACATAATATCGTC	8.82641	3.13274	5.50174e-08	5.45832e-06		GTGAATCCGTGG	4.91427	4.55494	7.94425e-05	0.00647577		ACCTGGCCGGGAGTCTCTGGTGAT	-8.74902
GTAATTGTGGATTCATTTGAGGAAAA	10.0992	5.50093	2.99148e-09	2.88623e-07		GTAAGCATCAACAAACAATTTGACAAG	-8.74836	4.53376	2.31357e-06	0.00019375		GAACGCATCTAAGT	8.85494	3.70037	2.80132e-08	3.38007e-06		GGTTTCACGTCAAC	-5.2672	7.33262	1.41085e-05	0.00101718		ATTTTGGAATGAAGCTAGAAATAGCTTCTAA	-5.93747	7.00252	2.81601e-05	0.00262607		GCGTTTATGGTGTAATGGTCAGCATGGCCGCCTTCCAAGCGGCCGATTCGG	5.21076	6.21545	1.65373e-06	0.000147567		CGAATCTCGTCCCAAACGGATTGTTTT	5.09442	2.69266	5.54437e-08	5.46736e-06		TGAAAGACGTTCTCTATCTCT	3.20013	6.10283	7.97264e-05	0.00648576		AAAGTGTTGTT	6.48271
GCCCGGAACTG	-6.73917	5.48888	3.01145e-09	2.89963e-07		GAGAAATATTCCATTGTTGCGCGAA	-8.56386	4.36212	2.32693e-06	0.00019375		GTTCCGGGGGAAG	6.82708	3.89463	2.8111e-08	3.38502e-06		TTTGTACACACCGCCCGTCGCT	-8.18376	5.38837	1.41726e-05	0.00101974		CGGCTCGTGGCACC	8.49449	5.49672	2.82309e-05	0.00262736		ACTCCGGAGAGGGAGCCTGA	-8.53161	4.84697	1.65786e-06	0.000147636		TCGAATCCTGCCAGGATCGTTATCTTTT	5.66691	1.74945	5.53781e-08	5.46736e-06		TGAGATCATGTTAGACTCA	3.45036	5.4103	7.99244e-05	0.00648873		GTAGGTGTAGTAGAATTATTTTT	-6.01058
ACCGCGGAAAG	-7.13937	4.70014	3.06284e-09	2.94317e-07		GAGACATGATCGGCTTTGTAAACA	-8.55146	4.35106	2.34001e-06	0.00019375		TTCGGTTCCGGGGGA	6.60577	4.48433	2.83242e-08	3.40381e-06		CAGCGGGGAAA	-5.03432	7.74445	1.42642e-05	0.00102426		CAGTAATTAGTTTAATAAAAATATAGCATTTGGA	-8.48723	5.26809	2.84411e-05	0.00264158		GATAGTAATATGGATACTTGTAATCGT	8.21014	4.42237	1.66972e-06	0.000148193		AGTTTTGGGTA	5.66762	1.74919	5.54399e-08	5.46736e-06		TGGCAGTGTAGTTAGCTGGTCG	-4.23759	5.13004	8.09513e-05	0.00655365		ATTATAAAATCGTGTC	-6.05317
ATGGGAGACCTCCTGGGAACCGTTAGT	-9.16085	4.03556	3.09202e-09	2.95445e-07		GTTTCCTAAGGAACTCTCTAGAACT	-8.53657	4.33778	2.33729e-06	0.00019375		GTAAGTTATAAAAAATAAGCGGTT	-9.41769	4.71989	2.83921e-08	3.40511e-06		TCCCGGCATGG	-4.96985	7.51054	1.43724e-05	0.00102996		CCTGGGAACCGT	8.63841	5.62546	2.85157e-05	0.00264318		AAAAACATTTTCAGTAGTCAA	8.21014	4.42237	1.67083e-06	0.000148193		GCAGGGCG	4.75497	1.63486	5.57821e-08	5.47863e-06		CGGCAGTGTAGTTAGCTGGTTG	-4.68379	4.42578	8.10502e-05	0.00655365		TTGCGACTGTATCCAAAACCCG	-5.63515
CGGAACCCGCTA	-8.61208	3.53171	3.09156e-09	2.95445e-07		GTTTTACTCTTGATGATTGTTGTGA	-8.52733	4.32936	2.33631e-06	0.00019375		GTGAATAATGTTTGGATTGTAGACA	-9.46617	4.7675	2.86774e-08	3.42554e-06		CACACCGCCCGTCGCT	-5.03397	7.3564	1.44375e-05	0.00103055		TACATCG	-5.58654	5.45296	2.88008e-05	0.00266425		TGCCCGGAACTGAGC	-4.81797	6.883	1.67874e-06	0.000148596		CGGGGGA	4.75497	1.63486	5.57807e-08	5.47863e-06		TTGGGAACATGTCCAGAACCTTA	3.86305	4.89052	8.13841e-05	0.00656743		TCGAATCCTGCCAGGATCGTTACCTTT	-6.81314
CGGGGCTGCACGCG	-7.31732	4.09293	3.09318e-09	2.95445e-07		TGGCAGTGTGATTAGCTGGTTGAAGAAACTAAGAAATTCAACAGCTCATTAAACTGCCTCT	6.78356	2.11988	2.34056e-06	0.00019375		GTTAAATTTGTCTGGAGTGAAGAATA	-9.41852	4.72015	2.86214e-08	3.42554e-06		CCGCCCGTCGCTGTCC	-8.11949	5.33264	1.44385e-05	0.00103055		CTTGGCATGGGAGAGGGCTGG	5.64689	6.85107	2.91178e-05	0.00268818		GGTTCGACTCCGGAG	-8.20228	4.55945	1.68448e-06	0.000148805		GCGAAAGGATCA	5.34321	1.49031	5.59575e-08	5.48484e-06		CCAATGCTGTCA	-5.28905	4.20031	8.25991e-05	0.00665213		TAACCGGATATATCTGACTAC	-5.13257
TCGGAACCCGCT	-7.30177	4.07967	3.11169e-09	2.96027e-07		TGGCAATGTGGTTAGCTGGTTG	6.78356	2.11988	2.3412e-06	0.00019375		AGAGGAACCGTT	6.09444	4.90545	2.95351e-08	3.52094e-06		GATGTCCGGGGCTGCACGCGCGC	-8.20621	5.40785	1.45698e-05	0.00103784		CTGAGTC	-8.01008	4.79495	2.93762e-05	0.0027012		CAGCGGGGAAAGAA	-8.16818	4.53244	1.69772e-06	0.000149674		GCTTGACTCTA	5.34321	1.49031	5.60951e-08	5.48734e-06		TCGAATCCCACTCTCGTCACC	-4.56839	7.01345	8.45485e-05	0.00679459		TGAAAGACATGGGCAGTGAG	-5.51685
TTACGTCCCTGCCCTTTGTACACA	-6.83781	4.90571	3.10947e-09	2.96027e-07		TGGCAGTGTGATTGGCTGGTTGA	6.78356	2.11988	2.34183e-06	0.00019375		GCACTGCTAGAACCATCATTTAACC	-9.38905	4.69195	2.96662e-08	3.52248e-06		TGGCAGTGTAGCTAGCTGGTTG	8.40053	5.4789	1.50723e-05	0.00107052		TGGCAGTGTAGTTAGCTGGTTA	-8.01008	4.79495	2.93597e-05	0.0027012		TCCCTGAGACTCTCCTTGTGA	6.64907	4.92962	1.71399e-06	0.000150807		AGGAGTGG	5.34286	1.49061	5.65757e-08	5.5233e-06		GGGTTATTTTAAATCTTAGATTTGA	-4.66883	4.34388	8.47062e-05	0.00679459		GTTTTCTCTAGAATGTCGGATCCTATT	-9.09094
CCGGGGCTGCACGCGCG	-8.95562	3.84468	3.1293e-09	2.97109e-07		AGAAGGTCGCTGGTTCGATTCCAGCATGAGGCACCA	-6.02936	5.61139	2.35508e-06	0.000194458		AGCTAGCTGGAC	6.72786	4.60525	2.96487e-08	3.52248e-06		ACCGCCCGTCGCTGCC	-5.1763	7.23961	1.51515e-05	0.00107052		TACCCGTCGTCCAATGCTGTCA	-4.55112	6.67592	2.94689e-05	0.00270433		GTAATATTCGGAAAGCGTTTTTT	8.20991	7.23751	1.73613e-06	0.000152148		AACCAAAACTGCTTTCTAAACTCTGCTC	4.91381	1.73611	5.71871e-08	5.57187e-06		GTCTACTGATCGTTCAACGTCATTGGG	6.88241	3.96245	8.52588e-05	0.00682529		GAACATGTCAACTAAATATGAACTA	-8.68306
TTCGGTTCCGGGGAA	-8.66691	3.58287	3.18441e-09	3.01741e-07		TGGCAGTGTGGTTAACTGGTTG	4.17932	2.75338	2.36874e-06	0.00019485		AAACAAATTGAAGAAAACACTGAATTT	-9.7983	5.09216	3.00852e-08	3.55214e-06		GTGATGCCCTTAGATGTCCGGGGCTGCACGCGCG	-8.04173	5.26588	1.51733e-05	0.00107052		GTGAGCTGG	6.02767	6.32523	2.96023e-05	0.00271117		GGATCTATTTTCTCGATCAGAAGGCT	8.18277	4.39663	1.73297e-06	0.000152148		ATAGGAAATGAATCAGGAGAGAA	4.65855	3.20953	5.9709e-08	5.80602e-06		GAAGATTTTGTGACTTTTATTAGAGCT	6.72909	3.85454	8.58208e-05	0.00683622		GAGGAAATTTTTCGGGTTCTGTTGTT	-6.94299
GTCCGGGGCTGCACGC	-7.26822	4.04203	3.22484e-09	3.04965e-07		TGGCAGTGTGATTAGCTGGTCG	4.74588	3.19155	2.36923e-06	0.00019485		TGGGTATGTTCTTCGTTCAAG	-7.31219	5.35787	3.01504e-08	3.55214e-06		ACACACCGCCCGTCG	-8.10088	5.31646	1.51755e-05	0.00107052		CTGGGAACCGTTAGTGGC	8.62663	5.61226	2.9771e-05	0.00271582		CGAGAGGCCCCGGT	-5.63747	5.52434	1.74131e-06	0.000152299		AGGGT	5.25788	2.44075	5.99883e-08	5.8216e-06		GTGAACGAACATTTTCTGAGCTACA	6.72909	3.85454	8.59056e-05	0.00683622		GCCTGTCACGTGCGAGACCG	9.81394
GCCCGTCGCTGCCC	-7.43225	5.81408	3.25289e-09	3.07008e-07		GAAGTAGAATTATTTGATTGGAGAAGG	-9.90472	5.6217	2.39878e-06	0.00019689		GATGGGAGACCTCCTGGGAACCGTT	8.622	3.49267	3.01015e-08	3.55214e-06		AGGCTGGCGTAG	-8.10088	5.31646	1.51789e-05	0.00107052		TAAGTCT	-5.38527	5.37205	2.97448e-05	0.00271582		GACTGGGGCGGTA	-6.03246	5.88492	1.77869e-06	0.00015526		ACGCGCGCT	4.54954	1.89995	6.13668e-08	5.94358e-06		GGTGCATTTAGGGACAGG	-6.90007	3.75393	8.587e-05	0.00683622		ACATATGATGATAAAATCCCCACGGAATTTCGATAATGACCAGTGATTAGTCTTGCTGATGT	-5.70001
CCCCGCCAGA	-8.61804	3.53772	3.28836e-09	3.09742e-07		CTCGTTATCAGCTTAGA	-9.81009	5.53166	2.42647e-06	0.000198665		TGGGAACCG	8.73371	3.59186	3.01544e-08	3.55214e-06		ATTCTTGGACCGTAGCGAGA	-5.33794	6.72302	1.53103e-05	0.00107765		GGGGCTGCACGCGCGCT	8.41717	5.43019	3.01063e-05	0.00273558		GTAATATTCGGAAAGCGTTTTTTAAA	6.137	4.38512	1.78262e-06	0.000155296		CCCGGAACT	5.25008	2.46351	6.18608e-08	5.9678e-06		GAACTGTATATTTTACTCTCTTAATATT	4.32378	4.83301	8.62925e-05	0.00685343		AAAAGAAAGATCAGAGTTGTG	-8.84251
ATATCGAGAGGCAGGAAGAGA	-7.2833	4.06235	3.31692e-09	3.11817e-07		GAGAAATATTCCATTGTTGCGCGAT	-8.73684	4.52178	2.42999e-06	0.000198665		GTCGAATTAGATTATTTCAGTAGGATTATTTCGATA	-10.4616	5.74634	3.03173e-08	3.56428e-06		ACTTGGATGGGAGACCTCCTGGG	-8.07682	5.29574	1.54644e-05	0.00108635		TGAGATCAAATTAAACTTATCG	-4.81444	6.5071	3.01057e-05	0.00273558		TCCGCGCCTGTCACG	-8.26967	4.61693	1.79357e-06	0.000155941		ATTCTGAAATTGTTTTTAAT	7.2398	1.67882	6.17987e-08	5.9678e-06		GCAATCAAGTAATGTTCTCGTTTTGGA	6.72772	3.84803	8.72338e-05	0.00690092		TCACCGGGATATCAGATGCTCA	-6.04526
ACTCCGGAGAGAG	-10.1705	5.00498	3.34122e-09	3.12866e-07		GTAGTAATCGTATGGAAACGTTCCT	-8.53234	4.33437	2.45891e-06	0.000200633		AGTTGCGAGCTATCTTAGTACTTG	5.97145	4.36576	3.05536e-08	3.57796e-06		GTCCGGGGCTGCACGCGCGCT	-6.33473	7.67682	1.55974e-05	0.00109139		TGCACGCGCGCT	8.41099	5.42438	3.02156e-05	0.0027401		TCCATAAACACCACTCTGAT	7.33185	5.51592	1.80623e-06	0.000156425		GGGGATATAGCTCAGCGGTAGAGC	-9.07149	4.11293	6.21842e-08	5.98719e-06		TACCTCACATAATATCGTCAAT	6.72772	3.84803	8.72133e-05	0.00690092		GTTAAATATTATACTCAAATCTATTGG	-8.71656
ACTGGCACGGACAAG	-7.3786	4.15006	3.33506e-09	3.12866e-07		GATTCTGTAAAGTTCTGTTATTATGTG	-8.5088	4.3125	2.47009e-06	0.000200798		AAGTAGTAGAGC	8.71385	3.57418	3.05252e-08	3.57796e-06		TCGGAAACGAAAGTCTTTCGGTTCCGGGGGAAG	-8.19948	5.40724	1.55697e-05	0.00109139		TTAGATGTCCGGGGCTG	8.48519	5.48854	3.0566e-05	0.00274802		GAAAGTCTTTCGGTTCCGGGGGAAGT	-7.30682	8.58229	1.80556e-06	0.000156425		TGTTTTGGATATACAGGATATG	9.00243	3.35032	6.51526e-08	6.26066e-06		GCGTGTGGGAGGGATGCGTTCGCGCACTCTCCCGA	-5.12078	4.06174	8.75644e-05	0.00691346		TTGGGACCTGTGTCTAAGTTG	-5.71736
TGAAACCGCGGAA	-6.69583	5.14395	3.35166e-09	3.13229e-07		ATTTTTGCGTGTGGGAGAGATGCGTTCGCGCACTCTCCCGA	4.22782	2.73709	2.47061e-06	0.000200798		GTTTTTTCATTTTAGTAAGATCGTAGG	-9.42627	4.72788	3.09108e-08	3.58457e-06		GGTGAATTTAGGGACAGGA	8.06278	5.16416	1.56936e-05	0.0010933		TTTGCGACCAAATTCAGGCCACG	-4.18162	7.54621	3.05483e-05	0.00274802		TATATCCATAAACACCACTCTGA	8.15494	4.37048	1.81666e-06	0.000156456		TTTGCGACTGTATACAAAACCCG	5.14183	1.97538	6.55036e-08	6.28205e-06		TGGCAGTATAGTTAGCTGGTTG	-5.03999	3.94876	8.92802e-05	0.0070351		GAATTTGGAAGTGTAGCTTTTT	-5.94243
ACTCCGGAGAGGGAGCCTGA	-8.86189	3.75819	3.44257e-09	3.20468e-07		GTCGAATTAGATTATTTCAGTAGGATTATTTCG	-10.4381	6.14325	2.48242e-06	0.000201363		GAGTTTCGGGAATATGTGGCAAAACT	-9.39737	4.69977	3.07378e-08	3.58457e-06		GGTGAATTTAGGGACA	6.22874	8.25755	1.57135e-05	0.0010933		ATAGGTTGGAGAA	-5.92583	5.38273	3.03924e-05	0.00274802		AGGTTGGAGAATGA	5.57539	5.96463	1.82078e-06	0.000156456		ATATCA	4.57845	2.23794	6.75026e-08	6.4611e-06		TGGCAGTGTGATTAGCTGGTTGAAGAAACTAAGAAATTCAACAGCTCATTAAACTGCCTC	-6.81999	3.69263	8.99963e-05	0.00707765		GTTGCGAGCTATCTTAGTACTTG	9.13122
TTCGGTTCCGGGGAAA	-8.8206	3.7251	3.43968e-09	3.20468e-07		GTAAAGATCTAGGTGTTTTATATTATC	-8.59838	4.39491	2.49404e-06	0.000201517		GTAATTTGAGATAATTTTGTAGAAC	-9.37732	4.68035	3.0683e-08	3.58457e-06		GCTGCCCGGAACT	-4.5994	8.69482	1.57168e-05	0.0010933		TGGAGGCTCTCCTTCGGGGGAGCGAT	-6.16563	4.77527	3.05909e-05	0.00274802		GGCTGGCGTAGT	-4.63028	7.80481	1.81914e-06	0.000156456		GGCGGGATGGCCGAGTGGTTAAGG	-5.83481	7.12777	6.79343e-08	6.48972e-06		TTTGGAATGAAGCTAGAAATAGCTTCTAA	-4.80767	8.10602	9.07037e-05	0.00711935		GAGATTGTTTGAGCTATTGAACTCGCA	-8.78104
GGTGAAATTCTTGGACCGTAGCGAGACGTC	-8.80865	3.71405	3.48896e-09	3.24153e-07		GTACTACAAGAGGACTGAAGATAGC	-8.50453	4.30851	2.49294e-06	0.000201517		TGAGGGTGATAT	-7.51538	4.77218	3.08939e-08	3.58457e-06		GGTGAATTTAGGGACAGGTCTTCTAAACTTGTTTTGAGCTAGTAAA	8.10222	5.20017	1.59208e-05	0.00109547		CACTT	-7.96525	4.75039	3.06011e-05	0.00274802		TTTCGGTTCCGGGGGAAG	-5.33434	6.13	1.81572e-06	0.000156456		GCCTCATTAGTTCAGTTGGATAGAATGTATG	-6.03325	4.96351	6.81467e-08	6.49732e-06		GAAGATCACTATTTGATTCAGTATAGG	6.83765	3.92845	9.29938e-05	0.00712301		GACTGAACTTTAGACAATTTATAAACA	-8.78104
TTTAGTTCAAAGAGGTAGTGACGAAA	-9.25673	4.13226	3.51281e-09	3.2543e-07		GGGGAGATAGCTCAGTGGTAGAGCATGT	-8.97398	4.73978	2.52112e-06	0.000203308		GTTGATAAGTAACTAACCATTGTTGGC	-7.43001	4.68909	3.09092e-08	3.58457e-06		AGTCTTTCGGTTCCGGGG	-5.08505	7.39742	1.58184e-05	0.00109547		ACTGTGTCTGATTTCTGCCCA	5.86134	6.14575	3.0724e-05	0.00275369		GAAGGGCACCACCAGGAGTGGAGCCTGCGGCTTA	-8.18423	4.54905	1.83509e-06	0.000157379		GGCGAGATGGCCGAGCGGTCTAAGG	-6.85719	10.7108	6.91357e-08	6.57879e-06		ACCAAAATTAAAACCAGAAGATTGTTT	6.70406	3.83312	9.37791e-05	0.00712301		TTTGCGACTGGATCCAGGCCATT	-7.50614
CCGGAGAGGGAGCCTGAGAA	-7.25691	4.03155	3.51635e-09	3.2543e-07		GAATTTGTTGAAACTCCTTGAAACAA	-8.56472	4.3627	2.60808e-06	0.000209913		GTACATCTGTCTACTATAATATCTGTG	-9.38365	4.68665	3.12467e-08	3.61649e-06		TTACGTCCCTGCCCTTTGTACAC	-6.50261	6.43002	1.58879e-05	0.00109547		TGTCTGGCG	8.81961	5.78697	3.09092e-05	0.0027649		CTGGCACGGACAAGAGG	-5.52351	5.92896	1.839e-06	0.000157407		ACTCCGGAGAG	5.38188	2.66273	6.94573e-08	6.59656e-06		GAATGCCGTAACTGAGGAATTGATCTT	6.70406	3.83312	9.38015e-05	0.00712301		TTTGGGAACATGTCCAGAACCT	-5.07267
GACAATCTCAGGGCCAGAGCTAAGG	10.0358	5.4392	3.54631e-09	3.27567e-07		GAAGTAGAATTATTTGATTGGAGAAGGT	-8.50537	4.30962	2.64332e-06	0.000212337		GCTAGATTCTGTAGCCTCAGATGCTT	-9.37339	4.67629	3.14859e-08	3.63711e-06		GCCCGGAACTGAGC	-6.56199	8.577	1.58234e-05	0.00109547		AAGGATTGACAGATTGATAGCTCT	4.75735	6.90096	3.1097e-05	0.00277631		GATATACAGTCTTGAAGTAGAATTATT	6.21994	4.46139	1.85532e-06	0.000158496		GTTTGATCTATTGATGAGATCATTAAGG	5.42955	1.53669	7.09269e-08	6.72308e-06		GTAAAAATAACTCTTTATATTATCTGG	6.66223	3.80113	9.34404e-05	0.00712301		GGTCAGCATGGCCGCCTTCCAAGCGGCCGATTCGGGT	-6.84721
CCGGGGGAAGTA	-8.97623	3.86961	3.67536e-09	3.38829e-07		TTTGCGACTGTATTCACATCACT	3.85167	5.87567	2.68126e-06	0.000214968		GTAGGTGTAGTAGAATTACTTTTT	-6.37592	5.85589	3.16375e-08	3.64492e-06		TCGGAACCCGCTA	-8.05237	5.27474	1.58462e-05	0.00109547		CGGTTCCGGG	4.79758	7.27848	3.16569e-05	0.00282083		TTTGCGACTGGATCCAGG	8.2632	4.47241	1.87086e-06	0.000159207		TGGAAGTCGGAACC	5.37202	2.65449	7.14894e-08	6.76061e-06		GTACTTCAGAGTGTTTCTCGTCCGAA	6.66223	3.80113	9.34065e-05	0.00712301		GTGAAATTCTTGGACCGTAGC	5.57643
AGGGGCGAAAGACT	-7.46669	4.23052	3.72639e-09	3.42871e-07		GACATATTCAAAAACATAGGAGCG	-8.7415	4.52547	2.72283e-06	0.000217879		GCCCGGAACTGA	8.59025	3.46461	3.16759e-08	3.64492e-06		ATGTCCGGGGCTGC	-8.0694	5.29199	1.59326e-05	0.00109547		TACCCGTAGTCAAATGCTGTCA	-4.50323	6.40904	3.1762e-05	0.00282473		TTCGGTTCCGGGGGAAGTATGGTTGCA	-5.00732	6.91457	1.86728e-06	0.000159207		GCCCCGGG	7.10421	1.56408	7.15994e-08	6.76061e-06		GTCTTCTTGACTGTCCGTTAATGTAGC	6.66223	3.80113	9.33726e-05	0.00712301		CGAATCCTGCCAGGATCGTTACCTTTT	-8.90173
TTTCGGTTCCGGGGGAAGTATGGTTGC	-8.59635	3.51846	3.77953e-09	3.47091e-07		GAAGTTCTCAAAGTCATGTAGTCTGCT	-6.21688	4.95357	2.73871e-06	0.000218727		GTTCTGTTATGTAGGATTTGGAATCTT	-7.41971	4.67858	3.18301e-08	3.64859e-06		AACGAAAGTCTTTCGGTTCCGGGGGAAGT	-8.02565	5.25252	1.60644e-05	0.00110241		TGGCACGGACAAGAGG	8.41771	5.43004	3.18861e-05	0.00283031		CGAGTCCCATCGGAATCGTTGACCTTTT	6.59183	4.87457	1.88306e-06	0.000159937		TCCGATGTAGTCTAGTGGTTATGATTTGC	-5.53595	5.97438	7.3325e-08	6.91021e-06		TAAACACCACTCTGATCTAC	6.66223	3.80113	9.33388e-05	0.00712301		TTTGCGACTGTATCCAAACTA	-4.79422
GTAAACTGTAGAAAGTGTTCCCACT	8.31666	6.03229	3.79534e-09	3.47872e-07		TCCGATGTGGTCTAGTGGTTAGGATTTGT	-5.7662	6.29804	2.78888e-06	0.000222306		GTGAGAATCTTGTG	8.63268	3.50212	3.17814e-08	3.64859e-06		TTACGTCCCTGCCCT	-6.16946	6.12559	1.62593e-05	0.00110725		GGCCCATAACCCAGAGGTCGGT	8.45253	5.46002	3.2236e-05	0.00285535		AGTCTTTCGGTTCCGGGG	-5.25687	6.59666	1.91056e-06	0.000161649		GGTTCCATGGTGTAGCGGTTAGCACTCAG	-5.30741	8.12342	7.34713e-08	6.91068e-06		GATTCTGTAAAGTTCTGTTATTATGTG	6.66223	3.80113	9.33081e-05	0.00712301		TATCACAGTTGATTTGAATTCGT	-6.80771
AATTCTTGGACCGTAGCGAGACGTCCTA	-8.58235	3.50567	3.93298e-09	3.59796e-07		GAAAAATTGTTTTGACCATTGGACA	-8.47443	4.281	2.82978e-06	0.000225133		AGGTTGGAGAATGAAA	-9.69089	4.98635	3.19407e-08	3.65424e-06		GTATCCGCGCCTGTCACG	-8.02212	5.24896	1.62122e-05	0.00110725		TGAGAAACGGC	8.40285	5.41783	3.2726e-05	0.00285535		GATTACGTCCCTGCCCTTTGTACACA	-5.92328	5.78407	1.90884e-06	0.000161649		CGGTTCATAGGT	5.41303	1.54573	7.57505e-08	7.09747e-06		GAAAATATCGTCAGAAGCAAAGTTTATT	6.66223	3.80113	9.32774e-05	0.00712301		GAACCTTTTGATATTCGGATATTTCATT	-8.71684
ACGGGGGCATTCGTATCGCTACGTTAGA	-7.34144	4.1153	4.01106e-09	3.66236e-07		GATTTGTGACAACTTTGATATTACA	-8.52321	4.32551	2.84969e-06	0.000225481		GGAAGACAGCATGAGATCGAGAAGA	-9.35156	4.65529	3.21446e-08	3.67052e-06		TCGAAGGCGATCAGATACCGCCCTAGTTCT	-8.06822	5.28794	1.62519e-05	0.00110725		CCTTCCAAGCGGCCG	6.29515	6.56924	3.26902e-05	0.00285535		TAAAGATGAAGTTTCGGATATA	8.21003	4.42228	1.92586e-06	0.000162321		TCTTGGACCGTAGCGAGA	5.41303	1.54573	7.5726e-08	7.09747e-06		TATTGTTGAAATAAAAGATTTTA	6.66223	3.80113	9.32467e-05	0.00712301		GGAACTTCGAAGATCTTTGTAACTA	-8.64936
TCCGCGCCTGTCACG	-8.61656	3.5345	4.02416e-09	3.66729e-07		GTTAGACCTGTCCATTCTTTGAACG	-8.47531	4.28216	2.84328e-06	0.000225481		GGTGAAATTCTTGGACCGTAGCGA	6.27573	4.69227	3.24609e-08	3.69955e-06		CGGGGCTGCACGCGCGCTACA	-8.7195	5.86509	1.62142e-05	0.00110725		CCAGGAGTGG	5.90401	6.21246	3.27083e-05	0.00285535		GAAGGGCACCACCAGGAGTGGAGCCTGCGGCTT	-8.12174	4.4918	1.92432e-06	0.000162321		TTTGCGTACATATCTCTGAACCT	5.41345	1.54544	7.58925e-08	7.09747e-06		TTTCACAGTAGATTATTGGTAAA	6.66223	3.80113	9.32161e-05	0.00712301		GACATAGACCAGAACTTTTAGATTATT	-8.64936
CAGCAGGGCG	-8.63241	3.55182	4.08091e-09	3.71191e-07		TGGCAGTGTGGTTAGCCGGTTG	4.65172	3.67041	2.85592e-06	0.000225481		ATTGGAACTTATCTTAACTTTGTTTAAT	-9.4855	4.78573	3.25241e-08	3.69968e-06		TCTTGGACCGTAGCGAGACGT	-5.17066	6.94897	1.63454e-05	0.00111099		GCGCCTGTCACGTGCGAGACCG	4.9298	7.0758	3.25662e-05	0.00285535		AGAAAGATCAGAGTCGTGTTTA	8.15483	4.3704	1.93981e-06	0.000163185		GGCACGGA	4.98138	2.62638	7.68494e-08	7.17325e-06		CATAAACACCACTCTGATCTACCT	6.65419	3.79607	9.42379e-05	0.00712301		CCTTCCAAGCGGCC	9.52371
CATCGGAATCGCCA	-6.56124	4.93483	4.1192e-09	3.73961e-07		GGTGAATTTAGGGACAGGTCTTC	5.59563	5.75645	2.85147e-06	0.000225481		TCCCATGTAGTCTAGTGGTTATGATTTGCGGCTC	-8.37716	10.2699	3.29953e-08	3.73379e-06		CCGGGGCTGCACGCGCGC	-8.44224	5.61558	1.64826e-05	0.00111818		GAATCCGACTGT	4.48709	7.78842	3.24254e-05	0.00285535		AGAGGGCTGGGGTTCGATT	-8.62737	4.93161	1.96806e-06	0.000165246		TCTATATGTTGAGGATACTTTCTGAACT	5.35956	2.64655	7.72547e-08	7.19734e-06		ATAGCAAACGAATAACTTTGG	6.65419	3.79607	9.42539e-05	0.00712301		AAAGTCTTTCGGTTCCG	5.17506
GTTGGAATTTTGAGAGATGTTTAAGG	9.99238	5.39675	4.14466e-09	3.75557e-07		GTATTGTTGTAATTTTGATCTAGTGGC	-8.48135	4.28734	2.86756e-06	0.000225971		GGCTGGCGTAG	6.89508	3.95662	3.30119e-08	3.73379e-06		CGCTGCCCGGAACTGA	-6.19072	6.15853	1.65645e-05	0.0011216		TGATATGTACAGTTATTCTG	-4.05853	9.78539	3.25737e-05	0.00285535		TTGAGACTAACGTTAGGGCTAA	6.13719	4.38503	1.98641e-06	0.000166418		GCGGAGGA	5.34011	2.62457	7.84753e-08	7.29716e-06		GCTTAATATCGTTATGACTGTATTCAT	6.65419	3.79607	9.42605e-05	0.00712301		TCTATATGTTGAGGATACTTTCTGAACT	-6.84306
GAAGGGCACCACCAGGAGTGGAGCCTGCG	-7.22944	4.00536	4.16069e-09	3.76294e-07		GTTAGTCGGGTTGGATTTTGCGTTT	-9.80168	5.52668	2.87962e-06	0.00022649		GGACAGAAACCTCT	8.66367	3.52958	3.29974e-08	3.73379e-06		TTGGATGGGAGACCTCCTGGGAACCG	-6.50494	6.4321	1.66082e-05	0.00112242		TTTGGGCTGCAGCACCGGGGGATCCGGAGTTGCCG	-5.33664	5.25357	3.26322e-05	0.00285535		TACGTCCCTGCCCTTTGTACACACCGCCC	-5.84374	5.709	1.98957e-06	0.000166418		TCGAATCCTGCCAGGATCGTTACTTTT	4.58526	2.24267	7.8629e-08	7.29757e-06		GATTTGGACTTCATTATTGCGAAGA	6.65419	3.79607	9.42699e-05	0.00712301		TTTGCGACCTATATCCAGG	-5.72705
ACTCACCCGGGCCGGACACT	-7.84424	4.58517	4.23737e-09	3.82503e-07		TGGCAGTGTAGTTCGCTGGTT	7.04772	2.32382	2.92304e-06	0.00022947		GTAGGACAGTGAAATTCTGCGTAAGGT	-9.47117	4.77098	3.32022e-08	3.73405e-06		CAGTAATTGGTTTAATAAAAATATAGCATTTGG	8.71247	5.775	1.68059e-05	0.0011316		GTCACTGTT	-6.05413	4.71662	3.23851e-05	0.00285535		TGGGAGAGGGCTGG	-4.7634	7.56876	2.01176e-06	0.000167955		TTTGCGAATGGATCCAGGCCATT	5.51651	1.62714	7.89156e-08	7.3103e-06		GTTTTGCTATTCAAGATATCTCTGTTGG	6.65419	3.79607	9.42721e-05	0.00712301		GACCTTGTAAAACATTCTTAAGAACTT	-8.61425
CTCCGGAGAGG	-8.54138	3.46711	4.29945e-09	3.85852e-07		GTAATACTGTTTAATTCTCTACTGATGT	-8.46835	4.27522	2.9459e-06	0.000230428		GAAGATCGGTAATGAGAATTCTTTACG	-7.39602	4.65602	3.31969e-08	3.73405e-06		GACTGGGGCGGTA	-5.84746	6.68313	1.681e-05	0.0011316		TAGCGAGACGTCC	8.39066	5.40727	3.28227e-05	0.00285837		AAGAACTGGCACGGACAAGA	-5.5161	5.92161	2.03478e-06	0.000169556		TGATTGGAAATCACTTGGGCTTTGCCCGCGCAGGTTCGAATCCTGCTGGCTGCGCCA	-9.29554	4.32175	7.94465e-08	7.33478e-06		GTTCTCGGAGTATCAACTTTTGATT	6.65419	3.79607	9.42837e-05	0.00712301		GATACAATATCGTTGATTTTGAAAATT	-8.81237
CCGGAACTGAGCAAT	-7.23126	4.007	4.31611e-09	3.85852e-07		GTAGATGGAGGAGGATAATTGAGAT	-8.45607	4.26413	2.94637e-06	0.000230428		CGGGCCGGACAC	8.60087	3.47398	3.30937e-08	3.73405e-06		CACGGACCAAGGAG	-8.36161	5.544	1.68393e-05	0.0011316		GTAAACGGCGG	5.89319	6.20265	3.32569e-05	0.00288618		TGATATGTCTGGTCTTCTTGGGT	5.06682	6.3372	2.06611e-06	0.000171842		ACGGACAAGAGGAATCCGACTGT	5.51593	1.62742	7.94798e-08	7.33478e-06		TGGACTGGATAGTTGCAAACAT	6.65419	3.79607	9.42952e-05	0.00712301		CATAGACTATTCTGAAATTGT	-8.84278
GAATGCACCGGATCCC	-7.20693	3.99089	4.3075e-09	3.85852e-07		GTAAGAGATAGGGATTTTGTGAATT	-8.56767	4.36679	2.95936e-06	0.000230574		AAACAGCGGGGAA	8.33255	3.2393	3.32988e-08	3.73786e-06		GTCCGGGGCTGCACGCGCGCTAC	-8.56033	5.72126	1.69149e-05	0.00113454		GCTGGACCAGGGG	4.50136	6.97467	3.33483e-05	0.00288618		TGGCACGTATATCGTTATC	8.15516	4.37065	2.08058e-06	0.000172643		CGAATCCCACTCTCGTCAACAACTCTTTT	4.64348	1.95067	8.168e-08	7.49711e-06		GTCATTTGATTTGTTTGATTGATTGTT	4.30483	5.30752	9.39889e-05	0.00712301		GCGGGT	-5.25666
AATTCTTGGACCGTAGCGAGA	-7.19665	3.97542	4.31709e-09	3.85852e-07		GCATAACAGTAGAACTTCCGTCAACG	-8.52222	4.32537	2.9564e-06	0.000230574		GTATGTCCCGTCT	6.8802	3.94312	3.34049e-08	3.74273e-06		ATTAGGGTTCGACTCCGGAGAGGGA	-8.09763	5.3131	1.70244e-05	0.00113974		AGCTATGATGTAACTATAATGAGCCTGATCTATTTGATGTGAACTCCGCTTCTGAGCTC	-4.62206	5.8428	3.33037e-05	0.00288618		TTTGCGACCCAATCCAGGCT	8.137	6.39749	2.08358e-06	0.000172643		TTTCAGAACAGTCTATGTGCGA	6.95874	1.44654	8.17166e-08	7.49711e-06		TTTGGCACTGTATAGGCTCCAA	2.99955	8.46022	9.41347e-05	0.00712301		GATATCA	-6.00175
GACCTCCTGGGAACCGTTA	-7.19665	3.97542	4.32304e-09	3.85852e-07		GCAATTGGATCTGGTATTTCACTGATT	-8.51299	4.31697	2.98693e-06	0.000232286		GTTGTACTAGAACTAATACTCGTTGTT	-9.44532	4.74632	3.34976e-08	3.74344e-06		GCACCTTCTCGGA	-6.19527	6.15034	1.73272e-05	0.00115783		AGGTTGGAGAATGAA	-6.09268	4.70877	3.33927e-05	0.00288618		TTAAAGCTTAGATTAAACGTCCC	6.10853	4.35875	2.09604e-06	0.00017335		TGAAAAAATTATATCACCAACT	6.95874	1.44654	8.17348e-08	7.49711e-06		GATAGTTGATTGTGTTGACAAACTTGAG	6.69618	3.82814	9.62143e-05	0.00713822		GATATTCAGCAAATGTAGACTTTTGTA	-8.61307
AAAACAGCGGGGAA	-6.55109	5.00576	4.29991e-09	3.85852e-07		GTTTGAAGCATTTTTCATTGATCTGGT	-8.617	4.41066	3.0013e-06	0.000232966		TGAAAGACATGGGTAGCGAGACG	-7.25365	5.30083	3.35682e-08	3.74344e-06		TACGTCCCTGCCCTTTGTA	-4.87176	8.16014	1.75662e-05	0.00116942		ACCAGGAGTG	6.01406	6.31305	3.3769e-05	0.00288635		ATAGGTTGGAGAATGA	6.16541	4.4109	2.1035e-06	0.000173641		ACCCGGGCCGGACA	6.95874	1.44654	8.18982e-08	7.49711e-06		ACGGAATATGAGGTTGATTTTCAGAAA	6.69618	3.82814	9.62371e-05	0.00713822		TTCGTTGTTACTGAAACTCGTCC	-5.99528
CTCCTGGGAACCGTTA	-8.86299	3.76465	4.36787e-09	3.89124e-07		GATATTGTGGTTGGCTTTGAAATGT	-8.49004	4.29487	3.00706e-06	0.000232977		GGTGAAATTCTTGGACCGTAGC	5.5478	5.26523	3.37175e-08	3.74344e-06		ACTGAATGCACCGGATCCCGTCC	-5.0879	6.86299	1.75334e-05	0.00116942		GAGGAATAGGGG	5.74877	6.07154	3.35095e-05	0.00288635		ACGTCCCTGCCCTTTGTAC	-8.54348	4.85663	2.12947e-06	0.000175456		TTCACAGTAGATTATTGGTAAA	6.95874	1.44654	8.20052e-08	7.49711e-06		TTTCGGATATACAGAATATGG	6.69618	3.82814	9.62598e-05	0.00713822		GTAAACGGCGG	9.25335
CAGCGGGGAAAGAA	-8.53949	3.46658	4.4496e-09	3.94929e-07		GATTGTTGTACACTCCTATGATTGTGG	-8.46662	4.27407	3.01284e-06	0.000232989		GAGTTAGTCGGTCC	5.76883	5.11989	3.37e-08	3.74344e-06		GGTGAATTTAGGGACAGGTCTTCTAAACTTGTTTTGAGCTAGTAA	8.07084	5.17094	1.80033e-05	0.00119231		TTTGCGACCTATCCAGGATCA	-4.91373	5.20357	3.36564e-05	0.00288635		GATATTTTCGTCTATTTGTGGAATTCCT	8.21056	4.4227	2.1524e-06	0.000176272		CACCCGGGC	7.17377	1.62247	8.23419e-08	7.49986e-06		GAACTGTATATTTTACTCTCTTAATAT	6.69618	3.82814	9.62825e-05	0.00713822		TTCCA	-5.86155
GCGGGGAAAGA	-6.32461	4.37382	4.44932e-09	3.94929e-07		TACCCGTAGTCCAATGATGTCA	4.27999	4.0474	3.02251e-06	0.000233301		TGTAGGCTGGCG	8.59015	3.46452	3.37253e-08	3.74344e-06		ACTCCGGAGAGGGAGCCTGAGA	-8.22549	5.42403	1.80012e-05	0.00119231		TCCCATA	-5.37944	4.81783	3.36667e-05	0.00288635		TCGGATATACAGAATATGGCT	8.21056	4.4227	2.15105e-06	0.000176272		CCGGGGGAAGT	7.17377	1.62247	8.23247e-08	7.49986e-06		GTCATGCGCAAGAACGTCAAATACTAG	6.69618	3.82814	9.63053e-05	0.00713822		TATTTGAAACTTCATCTTTGT	-8.61455
CGGAAGGGCACCACCAGGAGTGGAGCCTGCG	-8.52405	3.45151	4.50188e-09	3.98827e-07		GACACAATGTACTACAATGAATGGTA	-8.47186	4.27872	3.03647e-06	0.000233944		GCTAGATTCTGTAGCTCCAGGTGCTT	-9.33805	4.6421	3.39994e-08	3.76685e-06		CACCCGGGCCGGAC	-8.59127	5.74897	1.80106e-05	0.00119231		GAGTGT	-5.65798	5.95049	3.36515e-05	0.00288635		TTCGGTTCCGGGGGAAGTATGGTTGC	-5.28145	6.07952	2.14773e-06	0.000176272		TTTCACAGTAGATTATTGGTAA	8.95267	3.25716	8.30739e-08	7.55247e-06		GTAAATCCAATTAAATTGTTGTTCC	6.69618	3.82814	9.6328e-05	0.00713822		TTTGCGACCTATATCCAGGCCAC	-4.96036
ACCCGGGCCGGACACT	-8.94897	3.83813	4.52408e-09	3.99309e-07		TTTGGCACCATGGGACTCTAA	3.98383	5.81065	3.05231e-06	0.000234728		GTCATCATAGGCCAAGTAGTACAAG	-9.39042	4.69316	3.4619e-08	3.82129e-06		TAGATGTCCGGGGCTGC	-8.00396	5.23453	1.8053e-05	0.00119291		CGAATCTCGTCCCAAACGTACGTTTT	-6.04866	4.71237	3.37706e-05	0.00288635		ACGTGAGCTGGGTT	-5.51463	5.92038	2.15537e-06	0.000176272		CGGGG	4.63848	3.48933	8.48521e-08	7.69982e-06		GATCCGTGTTGTCTTTGAATTAACCTT	6.67027	3.80619	9.64504e-05	0.00713822		ATAAAATCGTGTC	-4.41092
TGGTTCCGGCCG	-7.59469	4.35241	4.5216e-09	3.99309e-07		GATGTTTTTTCCATATTGCGCGATG	-8.57986	4.37822	3.14839e-06	0.000240607		GATAAAAAGCTTCTTGACTGATGAG	-9.38636	4.68856	3.46033e-08	3.82129e-06		TGCACCGGATCCCGTC	-7.9673	5.2016	1.85285e-05	0.0012198		GGAGGAAAAGAAACT	8.42331	5.43597	3.40962e-05	0.00290878		GACAATAGACAATTGTTAGGCTTAGA	8.12655	4.34386	2.17399e-06	0.000177405		TGGACCGTA	7.21399	1.65108	8.59919e-08	7.77478e-06		TGCGAGGATGAAAAACTGAAGCC	6.67027	3.80619	9.63915e-05	0.00713822		TTTGCGACAGTTGTTGGCTTA	-6.39588
TGGCACGGACA	-6.46388	4.92716	4.58084e-09	4.03571e-07		GCTGGATATTGAAACTTTTCTTCTGAA	-8.47967	4.28623	3.14346e-06	0.000240607		TTCATTGTCCAGCGTTGAACC	-7.42233	4.6808	3.46968e-08	3.82281e-06		ATTACGTCCCTGCCC	-7.97657	5.20992	1.84963e-05	0.0012198		GTGTAAGTAGTAGAG	8.41463	5.42713	3.44784e-05	0.00293595		GATGTCCGGGGCTGCACGCGCGC	-8.26633	4.61294	2.17727e-06	0.000177405		TGGCACGGA	7.21399	1.65108	8.59961e-08	7.77478e-06		GATAGATTGCGTTGTAGAGTTGGAAGTC	6.67027	3.80619	9.63798e-05	0.00713822		AGAGGCCCCGG	9.53614
TGTGTAGGCTGGC	-8.52491	3.45331	4.66112e-09	4.09886e-07		GAATTTGGAAGTGTAGCTTTT	-5.61631	6.18289	3.14796e-06	0.000240607		GCAACTGTTGCAGCTTTTAACGATGGT	-7.42924	4.6874	3.47711e-08	3.82393e-06		TCTGGCGGGGAGT	-8.35027	5.53376	1.86783e-05	0.00122739		TTTGAACCGGGCA	4.80164	6.97547	3.46682e-05	0.00294576		CAAGAACTGGCACGGACAAGAGGA	-8.11899	4.48684	2.1817e-06	0.000177438		TCTATATGTTGAGTATACTTTCTGAACT	4.62343	1.51493	8.71119e-08	7.86112e-06		TAACCGGATATATTTGACTACAG	3.54383	9.87142	9.61103e-05	0.00713822		GTCACTCACTTTGAGATCTAATTGAAG	-8.64965
TGTGTCTGATTTCTGCCC	-6.74063	5.19644	4.76415e-09	4.18175e-07		TAACCGTAGTCCAATGCTGTCA	4.48773	4.18357	3.15198e-06	0.000240607		GCATACGTCGACGCTTCTTGTGAAT	-9.47824	4.77804	3.49884e-08	3.82581e-06		GGTGAATTTAGGGACAGGTCTTCTAAACTTGTTTTGAGCTAGTAACT	6.72222	5.8379	1.91193e-05	0.00125406		TTTGCGACCCAATCCAGGCTAA	-4.24386	8.64886	3.47627e-05	0.00294576		AATTCTTGGACCGTAGCGAGACGTCCT	-5.37633	6.16687	2.18919e-06	0.00017772		CGGGTA	4.64611	1.98315	8.93735e-08	8.05037e-06		TAATTTTTTGTTATATATATA	-3.72581	4.86647	9.49951e-05	0.00713822		GAATTGTTAGAATTTGTATGATAAACA	-8.64965
AAAGTCTTTCGGTTCCGGGGGAAGTATGGTTGC	-8.99332	3.88584	4.77906e-09	4.18712e-07		GTCTAACTCGTTGAAATTCTGCTACA	-8.48658	4.29256	3.17481e-06	0.000241777		CACCGGCTAAGCCCCCA	-9.37758	4.68028	3.50689e-08	3.82581e-06		TGGCAGTGTAGTTAGCTGGTT	8.64034	8.95079	1.91716e-05	0.00125518		CTCCCTTGGCATGGGAGAGG	-4.9701	5.56686	3.47854e-05	0.00294576		CCCGTCCGATCTCCGAA	-6.30308	5.30797	2.20018e-06	0.000178157		AGTGTTGGATTGTT	5.28635	2.9402	9.06488e-08	8.15023e-06		GTGAGATTTTAGAACAGTTCGAAAACA	6.72107	3.84962	9.78993e-05	0.00720888		GGTGAAATTCTTGGACCGTAGC	5.43396
ACAGCAGGGCGGT	-8.52957	3.45613	4.81593e-09	4.21169e-07		GATTGTGTCATAGAATTCGAAACT	-8.45343	4.26236	3.1848e-06	0.000241777		GGGCTTGATTGTCGTTTTGGTACAGA	-9.36933	4.67215	3.51067e-08	3.82581e-06		CCCGTCCGATCTCCGAA	-6.1312	6.10264	1.92703e-05	0.00125932		TAAAATCG	-5.2587	5.78676	3.4851e-05	0.0029459		ATGCACCTTCTCGGA	-8.15216	4.52118	2.20266e-06	0.000178157		CCGACTGAGG	7.04455	1.51527	9.39235e-08	8.41182e-06		GTCTCTATGAAACTCGTACAACGTAGC	6.72107	3.84962	9.79214e-05	0.00720888		GAATTTTTTCGTTAGGCTAGCAATGTA	-8.57798
TTTGTACACACCGCCCGTCGCT	-8.58877	3.50902	4.86775e-09	4.24921e-07		GCCAATTGATCGTCATCTGTGTAGAG	-8.43386	4.24404	3.17925e-06	0.000241777		GAAAGAACGAATGACCTTACAAGAACA	-9.34424	4.648	3.51092e-08	3.82581e-06		GGGTTCGACTCCGGAG	-6.20483	6.15667	1.93396e-05	0.00126154		GAAATTCTTGGACCG	8.38805	5.40414	3.51558e-05	0.00296282		GTGTTCCTTTCCATGTTCGTGCAA	8.12639	4.34373	2.2429e-06	0.00018108		CCCGGAAC	7.04455	1.51527	9.394e-08	8.41182e-06		GTAATCTTTAGAACCTTTTGGAGCT	6.72107	3.84962	9.79434e-05	0.00720888		ATCACTGTACTCTTGCAAAAGTTCATT	-8.57798
GAAATTCTTGGACCGTAGCGAGACGTCC	-7.04914	4.6033	4.88523e-09	4.25667e-07		GCATACGTCAAGCATCTTTTGAACG	-8.51808	4.32151	3.21765e-06	0.000243775		GTATTTGTCGTTACTAAATGTTGAAAT	-9.33675	4.6407	3.49925e-08	3.82581e-06		ATCGCTGTTGTTTGAACCGGGCA	-5.0852	8.59542	1.93983e-05	0.00126305		AGGTGAAATTCTTGGACCGTAGCG	5.4335	6.65369	3.51798e-05	0.00296282		TATATCCCAATGGTGATCAAGA	8.12661	4.34391	2.2518e-06	0.000181134		GTTAGTGGC	7.04455	1.51527	9.40746e-08	8.41182e-06		AGGTTGGAGA	2.89793	7.07551	0.000100107	0.0073547		TCTTTTTGATGAGACTTTTTGACTGAGGAA	-8.57858
ATTCTTGGACCGTAGCGAGACGTCCTACTGC	-7.21085	3.98974	4.93571e-09	4.28498e-07		GAAAAAATCGTTTTACTATCTTATGTT	-8.44454	4.2535	3.22288e-06	0.000243775		GAATGCACCGGATCCCGTC	8.55765	3.43587	3.52706e-08	3.83638e-06		AGCAGGGCG	-8.27124	5.47159	1.95156e-05	0.00126837		GAACTGAGCAATATCGAGAGGC	5.51402	6.72797	3.54178e-05	0.00297742		TTAAGTAGTTGTGCCGTAGGTCG	6.49826	9.23276	2.24847e-06	0.000181134		CTGCGAAAGGATCA	7.04455	1.51527	9.42463e-08	8.41182e-06		TTAAGACACTTTACTTATTTGGATTTGTTT	-4.11768	4.67106	0.000100837	0.00739478		GACTTTATCCAGAATCGCTTTTAGGAC	-8.57858
GTACTTGGATGGGAGACCTCCTGGGAACCGTTAGT	-7.16653	3.94736	4.92831e-09	4.28498e-07		GTGTTCCTTTCCATGTTCGTGCAAG	-9.7975	5.51857	3.23431e-06	0.000244193		TTCGGTTCCGGGGGAAGT	5.44061	5.34534	3.54472e-08	3.84158e-06		CCGCCCGTCGCTGCCCG	-5.01312	7.73014	1.97105e-05	0.00127871		TAATTTTTTGTTATATATATATT	-5.33159	5.24471	3.58069e-05	0.00300465		AACGAAAGTCTTTCGGTTCCGGGGGAAGT	-8.0882	4.46268	2.26618e-06	0.000181959		TGATATGTCTGGTCTTCTTGGG	5.07811	2.70896	9.596e-08	8.54918e-06		GGCCTGGTTAGTCGCAAAGA	3.63827	5.04264	0.000101025	0.00739504		GAATTTTTATAAATGCTAAACATTTCGG	-8.57858
TACGTCCCTGCCCTTTGTAC	-8.01633	6.05488	4.95337e-09	4.2925e-07		GCTTCAAGACAAGGTAAAGGAACT	-10.2105	5.92052	3.25286e-06	0.000245147		GAATCCGACTG	8.52473	3.4069	3.54185e-08	3.84158e-06		GCTGCCCGGAACTGA	-9.03911	6.15791	1.97846e-05	0.00128118		AAGTTTTGGGT	8.44564	5.4557	3.61268e-05	0.00300491		TTTGCGACCTATTCATGATCAA	5.1765	5.96859	2.27904e-06	0.000182658		AGTGTTGGATTGTTC	5.04887	3.01539	9.62089e-08	8.55577e-06		CTGGCAGTGTAGTTAGCTGGTTG	-4.67863	3.67401	0.000101534	0.00740699		GTTATGACTGTATTCATATCTTTGTCC	-8.57858
GTCTTTCGGTTCCGGGGGAAGTATGGTTGCA	-8.5074	3.43759	4.97628e-09	4.30453e-07		GAAAAGCTGCAGAGATTTTGAGTAAA	-8.65949	4.45209	3.27546e-06	0.000246403		GTTCACAAATTTGATGGCTTTCGTC	-9.32689	4.631	3.55312e-08	3.84369e-06		GCTGGTTCCGGC	-5.35203	6.21689	1.99127e-05	0.00128713		TTGCGAGCTATCTTAGTACTTG	8.4333	5.44317	3.61314e-05	0.00300491		ATATAGGTTGGAGAAT	6.10901	4.35892	2.30164e-06	0.000183538		TGGCTTGTGGC	5.21332	2.04442	9.87669e-08	8.76508e-06		TGGCAGTGTGACTAGCTGGTTG	-4.67863	3.67401	0.000101556	0.00740699		GAGCTATGATGTAACTATAATGAGCCTGATCTATTTGATGTGAACTCCGCTTCTGAGCTC	-5.97118
GCACCTTCTCGGA	-6.82152	4.33738	5.04564e-09	4.35661e-07		TTTGCGACTGGATTCAGGCCAT	5.08675	3.21641	3.2833e-06	0.000246545		GGCATAGTCTCTAACTCTTGAAACT	-9.37212	4.67481	3.56967e-08	3.848e-06		TTTGCACTTAGATACCTGACTACA	5.60599	7.16034	2.0185e-05	0.00130073		GAGACCTCCTGGGAACCGTT	4.89805	6.67547	3.61361e-05	0.00300491		GATATCGGTAGATGTGTAGTACCTGCT	6.07966	4.332	2.31794e-06	0.000183538		TGATGTAATTTTTTCACCTG	7.03069	1.5035	9.92794e-08	8.76508e-06		GAATCTCTCTGAGCATCCTTTTTTCAT	6.67836	3.81124	0.00010362	0.00748954		TGAAAGACATGGGTAGTGA	-4.59693
CCGCCCGTCGCTGTCC	-8.53232	3.45844	5.05619e-09	4.35783e-07		GTTAGTTTGATAAAACTTGTAGACA	-9.83088	5.55482	3.31947e-06	0.00024663		CCCCCAGGATAG	6.76362	3.83749	3.57002e-08	3.848e-06		CGGGCCGGACACTATAAG	-8.01101	5.24171	2.01961e-05	0.00130073		ACCCGTAGTCCAATGCTGTCA	-4.23474	7.7709	3.60225e-05	0.00300491		AGTACTCCGGAGAG	-4.796	6.71692	2.30388e-06	0.000183538		TTCGGTTGACT	7.03069	1.5035	9.92728e-08	8.76508e-06		GTTAAATATTATACTCAAATCTATTGGA	6.67836	3.81124	0.000103608	0.00748954		TTTGCGGCTGGATCCAGGCCATT	-6.32881
TCGGAACCCGCTA	-8.47365	3.40609	5.06905e-09	4.36103e-07		AGTGGTAGAGCATG	-9.64805	5.3767	3.32014e-06	0.00024663		GGATCTATTTTCTCGATCAGAAGGCTA	-9.37352	4.67697	3.58436e-08	3.85471e-06		TCTTGGACCGTAGCGAGAC	-5.76546	7.13403	2.03465e-05	0.00130624		TGAGATTCTCTTTTCTTCATTCAA	-8.09042	4.87609	3.59559e-05	0.00300491		ACACCGCCCGTCGCT	-4.80043	7.7593	2.29504e-06	0.000183538		CTATTCTGAAATTGTTTTTAAT	7.03069	1.5035	9.92663e-08	8.76508e-06		GAAATCTTAACTATATCAGAGGCT	6.67836	3.81124	0.000103597	0.00748954		GAGACCTCCTGGGAACCGTT	6.32749
ACTTGGATGGGAGACCTCCTGGG	-8.4944	3.42453	5.09343e-09	4.37411e-07		GTTAAGAATCTTGAATGAACGATGG	-8.5341	4.33557	3.30324e-06	0.00024663		CGTTAGTGGC	8.61168	3.48353	3.58918e-08	3.85471e-06		GCCCGGAACTGAGCAATA	-8.21785	5.41693	2.03549e-05	0.00130624		TTAGATGTCCGGGGCT	8.44515	5.45348	3.68596e-05	0.00305954		GCTGCCCGGAAC	-5.407	7.13434	2.30977e-06	0.000183538		GTTGTTGC	4.91457	2.56504	9.97913e-08	8.7944e-06		GAAAGTTATCGTAAATTTGTTTGTTTG	6.67836	3.81124	0.000103585	0.00748954		AGCTATGATGTAACTATAATGAGCCTGATCTATTTGATGTGAACTCCGCTTCTGAGCT	-5.83833
CCGCCCGTCGCTGCCCGGAA	-7.48091	5.01614	5.11987e-09	4.37521e-07		GATTTGGACTTCATTATTGCGAAGG	-8.53148	4.33382	3.31902e-06	0.00024663		AGCTTGACTCTAGC	8.65344	3.52051	3.60675e-08	3.86662e-06		TTTGCGACCTCTATCAGACCCC	4.93782	10.306	2.05326e-05	0.00131527		CTGGCGGGG	5.00931	6.24576	3.71685e-05	0.00307382		TTACGTCCCTGCCCTTTGTACAC	-6.65869	5.63225	2.32332e-06	0.000183538		GGGAACGGGCT	4.93813	2.2589	1.02673e-07	9.01796e-06		TGACAGTGTAGTTAGCTGGTTG	-4.28691	4.09535	0.000103441	0.00748954		TATAGGAAATGAATAAGGAGAGA	-6.08205
GAATCCGACTGTCTA	-7.12006	4.67839	5.10608e-09	4.37521e-07		GTATATATTGTATTTCGGGTTGACT	-8.42584	4.23694	3.31278e-06	0.00024663		GTTCCGGGGGAA	6.75527	3.83809	3.70082e-08	3.96034e-06		AGGAAGGCAGCAGGCGCG	-7.94859	5.1848	2.11258e-05	0.00134601		AGTTTTGGGTAG	4.80196	6.58821	3.72318e-05	0.00307382		GTATCCGCGCCTGTCACG	-8.08416	4.45809	2.31391e-06	0.000183538		GCGTGGGTTCAAATCCCATCTTCGTCATACTTT	5.36493	1.48717	1.02697e-07	9.01796e-06		GTACATCTGTCTACTATAATATCTGTG	6.76088	3.88034	0.000104414	0.00753334		GTGAATCCGT	-8.71712
TTTTGTATTGCTGAATTTTTGCT	6.53563	8.52352	5.12225e-09	4.37521e-07		GTAAAATATACTTAGCTGAACGCCG	-8.42494	4.23634	3.29902e-06	0.00024663		GTTATGACTGTATTCATATCTTTGTCC	-9.44413	4.74559	3.71305e-08	3.96066e-06		AGAGGGCTGGGGTTCG	-8.10481	5.31836	2.11045e-05	0.00134601		TTTGCGACCGCATCCAGGCCACG	-5.34249	4.73847	3.72023e-05	0.00307382		ATTCTTGGACCGTAGCGAGACGTCCTACTGCGAA	-8.0962	4.4718	2.31989e-06	0.000183538		TTTGCGACTGGATTCAGGCCATT	6.11937	6.35115	1.04828e-07	9.18861e-06		ACGTTTGATCGAGCTTTAAATA	3.26362	6.11952	0.000106257	0.00765263		GTGCGGTGATTAAAAGAATTTCTGAGCTT	-8.71712
AGAACTGGCACGGACAAGAG	-6.60371	5.60647	5.14446e-09	4.38632e-07		GTTGCCGGTAACAGAAACTGTTTTT	-8.55061	4.35104	3.36458e-06	0.000248595		GAAATCTTAACTATATCAGAGGCTGAG	-9.38594	4.68814	3.71441e-08	3.96066e-06		TGTTTGAACCGGGCAAA	-8.18484	5.39509	2.10711e-05	0.00134601		TGAACCGGGCAAAAGTCG	8.51148	5.51107	3.73205e-05	0.00307564		CAGGGCGGTGGC	-5.53848	5.43163	2.32956e-06	0.000183702		TAGTCAAACTATTGCACATAGA	8.69793	3.00452	1.05862e-07	9.26268e-06		TTTTGGAGGCTCTCCTTCGGGGGAGCGAT	-3.04364	6.13774	0.000107459	0.0077253		GGTTCCGGGGGAAGTATG	6.32349
ACCGCCCGTC	-6.54771	4.57986	5.16153e-09	4.3872e-07		GAAAAAAATATTTCGGGCAGTAGAAA	-8.41407	4.22612	3.3552e-06	0.000248595		GCAGAACTGGCG	8.80028	3.65134	3.72925e-08	3.96939e-06		TGGCCGTGTGATTAGCTGGTTG	8.23313	5.32152	2.11832e-05	0.00134725		AAAGAAGACCCTG	8.34791	5.37014	3.74919e-05	0.00308424		ATTGCACATAGACTATTCTGAA	8.09743	4.31663	2.33799e-06	0.000184037		GCACCGGATCC	7.13557	1.5873	1.06291e-07	9.28356e-06		TAATTTTTGCGTGTGGGAGAGATGCGTTCGCGCACTCTCCCGA	-6.72746	3.6239	0.000107767	0.00773361		TTTGGGATCGAATTAACCA	-6.29944
GGGGCGGTA	-6.43025	5.33251	5.1639e-09	4.3872e-07		TGGCAGTGTGGCTAGCTGGTTG	4.54007	3.7476	3.36091e-06	0.000248595		GAGAAAAAATAATTTTGTTTGGTCGTT	-9.32412	4.6282	3.74107e-08	3.97487e-06		AATTCTTGGACCGTAGCGAGAC	-7.97274	5.20811	2.12329e-05	0.00134801		AAGGAGTGTATTGC	8.61359	5.60052	3.77444e-05	0.00309948		ATTCTTGGACCGTAGCG	-4.83152	6.74989	2.35508e-06	0.000185052		TATCATTAACCAAAAAACCATC	7.13557	1.5873	1.06571e-07	9.29147e-06		GATCACAGATTTCTTTGCATTTATCGTT	4.8204	4.48021	0.000108396	0.00774165		GATCATCACTATCTGATTCGTTGACA	-8.57888
GATGTCCGGGGCTGCACGCGCGC	-8.608	3.52625	5.18111e-09	4.39399e-07		TGGCAGTGCGGTTAGCTGGTTG	4.22628	3.81549	3.37834e-06	0.000249167		GGAATTTTGAGAGATGTTTAAGGGC	-9.34456	4.64859	3.77468e-08	3.98189e-06		TTAGATGTCCGGGGCTGCACGCG	-8.06157	5.28103	2.13392e-05	0.00135234		TTCGGCTGTTAACC	5.78005	6.09871	3.7902e-05	0.00310421		AGGGCACCACCAGG	-8.14812	4.51116	2.36484e-06	0.000185489		GTCCGGGGCT	4.90803	2.22969	1.11907e-07	9.73926e-06		GAACGTAACTATGGTCAATCTCTGGAT	4.8204	4.48021	0.000108457	0.00774165		ATTTGCGTACATATTTCTGAACCTC	-8.61485
TAGGAACAAACGGGGGCATTCGTATCGCTACGTTAGA	-8.77736	3.68571	5.26465e-09	4.45691e-07		GGTGAATTTAGGGACGG	4.63646	2.39077	3.40125e-06	0.000250412		GTTTCCTAAGGAACTCTCTAGAACT	-9.32393	4.62833	3.77693e-08	3.98189e-06		ATACCCGCTGAAC	-6.13067	6.09133	2.1447e-05	0.00135676		GTCTTACGCTCATATCC	-3.79689	10.7655	3.79367e-05	0.00310421		GTCTTTCGGTTCCGGG	-5.14105	6.87881	2.37437e-06	0.000185576		ACTCCGGAG	5.63537	1.70229	1.12511e-07	9.77443e-06		GACAAAGATTTGTTGAAGATTGAACTT	4.80152	4.46409	0.000108436	0.00774165		TCT	-6.73538
CGGGGGCATTCGTATCGCTACGTTAGA	-8.47935	3.41084	5.4235e-09	4.57513e-07		GTTAAATTTGTCTGGAGTGAAGAAT	-9.74023	5.46824	3.44293e-06	0.000251249		GTAAAGATCTAGGTGTTTTATATTATC	-7.43167	4.69085	3.77741e-08	3.98189e-06		ATCGCTGTTGTTTGAACCGGGCAA	-6.14397	6.11382	2.17694e-05	0.00136503		CAGTCGGTAGAGCACC	8.34557	5.36818	3.81336e-05	0.00310927		GATGTCCGGGGCTGCACGCG	-5.45768	6.24171	2.37131e-06	0.000185576		ATGTCTGGCGGGG	5.02412	1.87474	1.12862e-07	9.7876e-06		TGGCAATGTAGTTAGCTGGTTG	-5.16738	4.0481	0.000114423	0.00815302		TTGCGTACATATTTCTGAACCT	-5.09467
TAGGGTTCGACTCCGGAGAGGGA	-6.52273	4.97815	5.41404e-09	4.57513e-07		GTAAGCATCAACAAACAATTTGACG	-8.55455	4.35531	3.43738e-06	0.000251249		CTCCTGGGAACCGTT	6.43053	4.32187	3.78108e-08	3.98189e-06		TGCACCGGATCCCGT	-7.91034	5.15262	2.16543e-05	0.00136503		TCAAACCTGAGTC	-5.23952	5.1583	3.81031e-05	0.00310927		GATATTTGAGATTGTTGATTGATTGTT	6.24711	4.48593	2.38988e-06	0.000186457		TGGGAGT	5.34921	1.49649	1.13771e-07	9.79207e-06		TATTGCACATAGACTATTCTG	6.68008	3.81816	0.000115566	0.00818008		ATCATGGGAAGGACGCAAATT	-8.68392
AGGGTATTGGCCTACCATGGTTGTGACGGAT	-7.18341	3.97	5.50053e-09	4.63191e-07		GAATCTCTTTTGTTACTGTGAAACG	-8.42945	4.24053	3.4247e-06	0.000251249		GTAGTAGAGCA	9.34345	4.14559	3.76194e-08	3.98189e-06		TGGCACGGACAAGAGGAATCC	-7.93149	5.17071	2.17504e-05	0.00136503		GTATTGGCCTACCATGGTTGTGACGGATAACG	8.45175	5.45903	3.85657e-05	0.00312569		GTAATATTCGGAAAGCGTTTTTTAAAA	8.09754	4.31671	2.39772e-06	0.000186738		CTATATGTTGAGAATACTTTCTGAACTA	5.34962	1.4962	1.13915e-07	9.79207e-06		GTCATTATAGAATACTGAAGCCAATTC	6.68008	3.81816	0.000115591	0.00818008		GTTTGAAGAATAAATTACTCGTCCCCT	-8.68392
CGGGGCTGCACG	-8.46507	3.39895	5.52926e-09	4.6479e-07		GTTCCTATGTAGAACACATATTCTCGT	-6.18558	4.92453	3.43686e-06	0.000251249		GATGTAACTGAATATTCTGGATATGAT	-9.30158	4.60653	3.80865e-08	4.00385e-06		ACAGCAGGGCG	-7.93529	5.17453	2.17601e-05	0.00136503		TGCTGTATGTCCC	8.36917	5.38893	3.86064e-05	0.00312569		AAGGAAAGGGCAAGTCTGGTGCCAGCAGC	-8.3759	4.70821	2.40587e-06	0.000187042		TACTGGCCTTCAAACTTCT	5.34962	1.4962	1.13534e-07	9.79207e-06		TTTGGCTGAGGAT	6.68008	3.81816	0.000115617	0.00818008		TTGGGAACATGTCCAGAACCTT	-5.34334
AGGGCACCACCAGG	-8.50003	3.42923	5.56154e-09	4.66484e-07		GCGTTTATGGTGTAATGGTCAGCATGGCC	-5.24957	6.36704	3.43315e-06	0.000251249		GTATTATGCAAAGTAGAGTGC	-7.34466	4.60567	3.8411e-08	4.03085e-06		CCGGGGCTGCACG	-7.95426	5.18947	2.17247e-05	0.00136503		GCCCGTCGCTGCCCG	4.64135	7.58813	3.84867e-05	0.00312569		GGGTTCGACTCCGGAG	-6.36296	5.36125	2.42351e-06	0.000188082		AAGGAGTGTATTGCT	5.34962	1.4962	1.13486e-07	9.79207e-06		TCCGATGTGGTCTAGTGGTTAGGATTTGTGGCTC	3.78131	5.20064	0.000115076	0.00818008		TTAACCGGATATATTTGACTAC	-5.70694
ACCGCGGAAAGCT	-6.80495	4.87512	5.56899e-09	4.66484e-07		GGAGAAGTTGTTGGTTGTGGAATCAAA	-8.41223	4.22429	3.4619e-06	0.000252189		GTATATTTTGTTGGTTTGTTAAAAT	-9.34803	4.65161	3.85921e-08	4.04274e-06		CACCGCCCGTC	-4.54074	7.72892	2.18352e-05	0.00136675		CCCA	-4.73024	5.77076	3.85684e-05	0.00312569		TCGAAGGCGATCAGATACCGCCCTAGTTCT	-8.12917	4.49483	2.43112e-06	0.000188119		AGTCTCTGGTCGAT	5.34962	1.4962	1.13282e-07	9.79207e-06		TTTGGCACTTAGGAATTCCAC	-7.22813	4.01796	0.00011644	0.00822382		ATAGGAAATGAATAAGGAGAGAAA	-6.8802
TCCCCCAGGATA	-6.65429	4.18561	5.65489e-09	4.72848e-07		CAAGGTAATTTCATAGTCATG	-10.51	6.21287	3.47917e-06	0.000252813		GTTTTTGATTGCGAATTTTAGTAGT	-9.40801	4.71035	3.88786e-08	4.04432e-06		TGAAAGACGTTCTATATCTC	8.107	5.20416	2.192e-05	0.00136725		AGGTTGGAGAATGA	-5.46995	4.90498	3.86866e-05	0.00312669		AGGGCACCACCAGGAGTGGAGCCTGCGG	-8.12917	4.49483	2.43252e-06	0.000188119		GTAGTAGAGC	5.13699	1.94726	1.14566e-07	9.83078e-06		TAAACACCACTCTGATCTACC	6.74399	3.85793	0.000117173	0.00826113		GATGGGAGACCTCCTGGGAACCGTTAGTG	9.02225
ATTACGTCCCTGCCCTTTGT	-7.73836	4.48429	5.67402e-09	4.73617e-07		GATCTTAATGAGTCATCTGAACAAG	-8.56109	4.36133	3.48875e-06	0.000252813		GTAGTAATCGTATGGAAACGTTCCT	-9.32046	4.62531	3.88077e-08	4.04432e-06		GGTGAATTTAGGGACAGGTCT	5.73051	5.63876	2.1907e-05	0.00136725		AAAACAGCGGGG	4.26398	7.8571	3.88973e-05	0.00312989		TCGAATCGTCTAGAAGTTAATTT	6.92821	9.77042	2.45284e-06	0.000189358		TCCCTGAGATTTCGTATAACCGGA	4.71307	3.34651	1.14988e-07	9.84973e-06		GAAGTCGGAACCC	4.7986	4.43683	0.000118774	0.00835934		GAAAGAAGACCCTG	6.17928
CGAAGGCGATCA	-8.58309	3.50734	5.69567e-09	4.73764e-07		GATTGTTCTTTGATTGATTGTTCTTT	-8.41504	4.22737	3.4857e-06	0.000252813		GATTCTGTAAAGTTCTGTTATTATGTG	-9.29817	4.60328	3.87099e-08	4.04432e-06		GGTGAATTTAGGGGCAGGTCTTCTAAACTTGTTTTGAGCTAGTAACTCA	8.03876	5.14111	2.20678e-05	0.00137407		TAATACTGTCAGGTAATGACGC	-4.11057	6.8786	3.89158e-05	0.00312989		TGGATGGGAGACCTCCTGGGAACCGTTAGTGGCGTA	-8.06441	4.44118	2.48341e-06	0.000191383		CAGTGGTAGAGCATG	-9.8599	4.85499	1.16524e-07	9.96379e-06		TAGTGGTCTTC	6.61087	3.76319	0.000119605	0.00836451		CGAATCCCACTCTCGTCAAGAATCTTTT	-8.78159
ATGGGAGACCTCCTGGGAAC	-8.47172	3.40563	5.69449e-09	4.73764e-07		ACTCGATTGGTTTATTTTTAAAATATGGCTCTGA	7.33365	2.55747	3.51667e-06	0.000254391		TCACCGGGATATCAGATGCTCA	-7.17281	5.22261	3.88484e-08	4.04432e-06		AAATTCTTGGACCGTAGC	-6.06156	6.03959	2.21579e-05	0.00137727		GTTTTTATATAGCTGTATGAAGCCTGGA	-6.36786	4.97422	3.893e-05	0.00312989		TCGGAAACGAAAGTCTTTCGGTTCCGGGGGAAG	-8.26452	4.62273	2.49926e-06	0.000192268		CCGCCCGTCG	5.40235	1.53993	1.17201e-07	9.98906e-06		GTATTGTTGGTACGAATCGTAGACA	6.61087	3.76319	0.000119629	0.00836451		GATAGAGGATCGCTTTTTTAGTAACT	-8.78159
AGGGCACCACCAGGAGTGGAGCCTGCGG	-8.48219	3.41321	5.71557e-09	4.74336e-07		GAAAATACAAGCATTAGTAGTTGAGG	-9.62359	5.35771	3.54059e-06	0.000255181		CGCCCGTCGC	6.74979	3.77406	3.91375e-08	4.05709e-06		GCCAGGATCGCCA	-4.58586	8.37815	2.23279e-05	0.00138301		CGGAGAGGG	6.21144	6.49497	3.92585e-05	0.00314193		TTCGTTGTTACTGAAACTCGT	8.09731	4.31654	2.5048e-06	0.000192359		TGAACCGGGC	5.40287	1.53965	1.17432e-07	9.98906e-06		GTAAATCCAATTAAATTGTTGTTC	6.61087	3.76319	0.000119655	0.00836451		AAAAACATTTTCAGTAGTCAAA	-8.64995
AACGAAAGTCTTTCGGTTCCGGGGGAAGT	-8.45932	3.39417	5.74235e-09	4.74336e-07		GGAATCATTTGGGACCTCGGGAACA	-8.44547	4.25412	3.54492e-06	0.000255181		TAGCCCATCACG	8.43185	3.32559	3.91073e-08	4.05709e-06		TGACGGAAGGGCACCACCAGGAGTGGAGCCTGC	-7.94283	5.18212	2.22955e-05	0.00138301		TGTTTGAACCGGG	5.7256	6.04984	3.92308e-05	0.00314193		ACCGCCCGTCGCTGCCC	-4.81906	7.8496	2.55132e-06	0.000195591		ACTGGCACGGAC	5.40287	1.53965	1.17373e-07	9.98906e-06		GCTTTGGGTAGATTTTCTGATTTGATT	6.61087	3.76319	0.00011968	0.00836451		GTCTTGCAGTACTATATCCGGAATGTG	-8.64995
ATTCTTGGACCGTAGCGAGACGTCCTACT	-7.64651	6.37326	5.73972e-09	4.74336e-07		GCTTCAAGACAAGGTAAAGGAACTA	-8.43927	4.24883	3.54606e-06	0.000255181		GAGAAATATTCCATTGTTGCGCGAA	-9.3547	4.65772	3.92515e-08	4.06185e-06		TTGATTACGTCCCTGCCCTTTGTA	-5.35603	6.21901	2.24352e-05	0.00138724		TGGCAGTGTGGTTAGCCGGTTG	-4.87594	5.68511	3.94207e-05	0.00314193		CGGAAGGGCACCACCAGG	-6.38803	5.38377	2.55682e-06	0.000195672		GCCGCCGGG	7.56481	1.94461	1.19343e-07	1.0134e-05		GACAACTCGTTGATTTGTTGAGACA	6.6191	3.76834	0.000120737	0.00838006		GTGGTTTCAAATGAACTCCAGA	-5.95049
ACTGGCACGGACAAGAGGAAT	-7.14779	3.87766	5.73398e-09	4.74336e-07		GCTAAGTATTTAATTGTTGTTGTTGTT	-8.40593	4.21891	3.56519e-06	0.000256113		GGTTTGGAACTTGGATGAGGGAGTCT	-9.37407	4.67653	3.96808e-08	4.08499e-06		AGTCGGAACCC	-7.95787	5.19517	2.25497e-05	0.00139191		CCCGTAGTCCAATGCTGTCA	-5.08804	5.33657	3.93802e-05	0.00314193		GCTCGGCTT	8.06788	4.28901	2.57204e-06	0.000195888		AGGACGTGAAACC	5.28976	2.58156	1.2152e-07	1.0301e-05		CGGATATACAGAATATGGCTA	6.6191	3.76834	0.000120717	0.00838006		AATCGCTGTTGTTTGAACCG	6.54289
TACTCCGGAGAG	-8.50565	3.43391	5.81096e-09	4.79173e-07		GTTACATGTAGACCAAACTTTTTTCC	-8.43652	4.24639	3.58182e-06	0.000256419		GTTTTACTCTTGATGATTGTTGTGA	-9.31978	4.62419	3.95515e-08	4.08499e-06		CCCGGGTTCGAT	-7.97118	5.20341	2.27192e-05	0.00139994		TGAGATCATATTAGACCCATCTT	-5.19723	5.154	3.94115e-05	0.00314193		GATAGATATAATCTTGAGTTTGTTAGTG	8.06776	4.28893	2.5682e-06	0.000195888		CTGGCACGGA	4.85772	2.18506	1.25716e-07	1.06382e-05		TGCGAGGATGAAAAACTGAAG	6.6191	3.76834	0.000120697	0.00838006		GAACGGGCTTGGCA	4.39862
CTACTGAATGCACCGGATCCCGTCC	-8.4526	3.38743	5.85107e-09	4.80817e-07		TTTGCGACCATATTCAAAGCCCG	5.05476	2.09874	3.57935e-06	0.000256419		TCACCGGGTATACATTCATC	-6.58671	5.52364	3.96334e-08	4.08499e-06		GTTCCGGGGGAAG	-6.05415	6.03329	2.27725e-05	0.00140081		CCTTCCAAGCGGCCGATTCG	9.0083	5.95213	3.96098e-05	0.00315155		CCCGTCCGATCTCCGAAGTG	-8.08533	4.45754	2.57721e-06	0.000195888		TATCGGATATACAAGATATGG	7.35318	1.78042	1.28351e-07	1.08425e-05		GGCGAATTTAGGGACAG	-6.90983	3.75902	0.000120654	0.00838006		AGGCAAGATGTTGACATAGCTGA	-4.73375
GTATCCGCGCCTGTCACG	-8.44971	3.38503	5.84271e-09	4.80817e-07		GGGGATATAGCTCAGTGGTAGAGC	-7.06276	8.81782	3.6036e-06	0.00025709		TCCTGGGAACCGTT	8.56849	3.44542	3.98722e-08	4.09763e-06		CCTGCCAGGATCGCC	-5.46905	7.77047	2.28626e-05	0.00140392		TGGCAGTGTGGTTAACTGGTTG	-6.03862	4.65721	3.96899e-05	0.00315248		AATCCCACTCTCGTCACCA	-8.08533	4.45754	2.57742e-06	0.000195888		AGGGAAGTCGGCA	5.36559	2.64518	1.28689e-07	1.08522e-05		GGTGAATTTAGGGACAGGTCTTCTAAACTTGTTTTGAGC	-8.12568	4.81782	0.000121952	0.00844983		TCAAATGGTGTTAACTGTGGTAACTTAGGGAA	-5.49933
CGGGGCTGCACGC	-7.13399	3.92259	5.86489e-09	4.81123e-07		GTCGAATTAGATTATTTCAGTAGGATTATTTAAA	-6.25564	4.99242	3.59864e-06	0.00025709		GCTTGAAATCTAGGATTTATGAATTCT	-7.339	4.60067	4.01963e-08	4.12382e-06		TTAGGGTTCGACTCCGGAGAGGG	-5.0741	6.84214	2.29631e-05	0.00140767		CCAGGAGTGGAGCCTG	8.52482	5.52267	3.9928e-05	0.00315507		TTGGGACCTGTGTCTAAGTTG	5.49681	5.12003	2.60403e-06	0.000197149		CAAAT	4.53923	1.453	1.32656e-07	1.11675e-05		ATAAATTGATAAATATTTGTTGGATTCT	6.60258	3.75804	0.000124125	0.00857078		TGAGATCAAATTAAACTTATCG	-7.46725
TGAGCTGGGTTTAG	-6.53251	5.28946	5.94923e-09	4.87203e-07		GTTGGAATTTTGAGAGATGTTTAAGA	-8.60558	4.40081	3.65083e-06	0.000260012		GAAAATCTTGTTTGGCCTGTATAGT	-9.40514	4.70718	4.08443e-08	4.15058e-06		TCCGGAGAGGGAGCCTGAGAA	-7.93342	5.17159	2.32363e-05	0.00141953		CCTGCGAAAGGATCATT	-4.93428	6.06793	3.98875e-05	0.00315507		TTTGAGACTAACGTTAGGGCTAAA	5.17139	5.39221	2.59856e-06	0.000197149		CCGTCGGAGTCGGCTTTT	5.49744	1.59005	1.32957e-07	1.11737e-05		TTTGCAACGTAACTGGGCTTA	-2.7415	7.77839	0.000124014	0.00857078		ATAGGTTGGA	-8.54139
AACCGCGGAAAGC	-8.48503	3.41558	5.98466e-09	4.89264e-07		GTATAGTTATAGACTGTTGAGAATA	-8.43209	4.24287	3.65922e-06	0.000260163		GAGACATGATCGGCTTTGTAAACA	-9.34537	4.64877	4.0816e-08	4.15058e-06		ACCAGGAGTGGAGCCTGC	-7.93713	5.17744	2.32048e-05	0.00141953		TCCCGGGTGTCCCCTCCA	-6.11449	4.7258	3.98344e-05	0.00315507		ACGTCGGGTTCACCA	-5.64961	7.17907	2.60742e-06	0.000197149		TGAGATCATTATGCAATCACG	5.26519	1.41171	1.34547e-07	1.12879e-05		GGTGAATTTAGGGACAGGTCTTCAA	-7.04663	3.89871	0.000125063	0.00862079		TTTGCAACGTAACTGGGCTTA	-5.0097
ACACGGACCAAGGA	-6.82697	5.18229	6.04184e-09	4.93093e-07		GATTTCGTCGTGTAGTCGGTTATCACATCTGTCTGACACACAG	-7.87008	6.51371	3.67872e-06	0.000261101		CCTGGGAACC	6.60647	4.49432	4.06798e-08	4.15058e-06		GCCTTCCAAGCGGCCGATTCGGGT	-5.91068	6.71785	2.34408e-05	0.00142956		GAATAAATCAGAGGGTT	5.78271	6.10112	4.00082e-05	0.00315599		GTATCCAATAGCTTTCGTTGTTTTTAAA	8.0677	4.28888	2.65984e-06	0.000200768		TACCCGTAATCCAATGCTG	3.78224	6.02874	1.35192e-07	1.13226e-05		GTTTATATTTAGCCCCAATCGCTTCAG	6.64606	3.791	0.00012745	0.00865121		ACTAGTTTTCGGAATATAAACAGCAACT	-8.54231
CTGGCGGGGAGTTT	-6.63483	4.71217	6.08512e-09	4.95776e-07		GAAGATCAGTTGAATTAGAACTACT	-8.45871	4.26766	3.6892e-06	0.000261397		GGAACCGTTAGTG	6.82681	3.89484	4.08098e-08	4.15058e-06		TGACGGAAGGGCACCACCAGG	-8.09122	5.30633	2.35848e-05	0.00143589		TGAACCGGGCAAAAGTCGTAAC	8.35543	5.37579	4.05327e-05	0.00318721		ACAGCGGGGAAAG	-4.96475	6.71263	2.66919e-06	0.00020089		AGCGGGGAA	5.50229	2.78412	1.35425e-07	1.13227e-05		ATACATTTTATTTCTGTTTGAACAGCT	6.64606	3.791	0.000127451	0.00865121		TGGCTTGGATCTATCTGCAAAC	-5.24108
CGAAAGTCTTTCGGTTCCGGGGGA	-7.12925	3.91254	6.10852e-09	4.96833e-07		GAAGATCTCGTAATCTATTTTGTCT	-8.41143	4.22439	3.76298e-06	0.00026617		AGCTATCTTAGTACTTGG	8.27961	3.19362	4.05473e-08	4.15058e-06		TTCGGTTCCGGGGGAAGTATGGT	-5.22521	6.61848	2.3642e-05	0.00143692		CGAGCTATCTTAGTACTTGGATGGGAGACCTCCTGGGAACCGTTAGTGGCGTAAGTC	-6.04967	4.66594	4.066e-05	0.00318721		ACTCCGGAGAGAGA	-5.44022	5.84943	2.67058e-06	0.00020089		TTTTGTATTGCTGAATTTTTG	4.66389	3.43554	1.37787e-07	1.14909e-05		GTGAAATCTTAACTATATCAGAGGCT	6.64606	3.791	0.000127453	0.00865121		TCCATAAACACCACTCTGAT	-6.62689
CGACTCCGGAG	-8.467	3.39941	6.14779e-09	4.99176e-07		GAGCTATTGAACTCGCATTCTTGAGG	-8.37364	4.18957	3.78686e-06	0.000267402		GAAATTCTTGGACCG	8.53549	3.41637	4.08749e-08	4.15058e-06		CCATCGGAATCGCCA	-4.88328	7.21528	2.37914e-05	0.00144354		CCGT	-6.04967	4.66594	4.06807e-05	0.00318721		CGAGCCCCCTGGAGGGCTTAGTCTTTT	8.09726	4.3165	2.68166e-06	0.00020138		AGGGAACG	5.06525	1.91245	1.37907e-07	1.14909e-05		AGCGCTGTTTAATGGGTGCTTCCA	6.62737	3.77348	0.000127545	0.00865121		TACTGGCCTTCAAACTTCTTAACT	-10.608
GACCTCCTGGGAACCGTT	-5.92909	4.63933	6.1728e-09	5.00354e-07		GTACTTCATGGACTTCTAAATTGTATT	-8.53825	4.33947	3.84002e-06	0.000269778		GTACTACAAGAGGACTGAAGATAGC	-9.29633	4.60136	4.1227e-08	4.17359e-06		ACCTCCTGGGAACCGTTA	-8.13365	5.34305	2.38781e-05	0.00144633		GGTGAATTTAGGGACAGGTCTTCTAAAAA	-8.17528	4.96027	4.06561e-05	0.00318721		ACACGGACCAAGGA	-6.4354	6.26108	2.68839e-06	0.000201542		AAGCTCGTAGTTGGAT	5.00722	1.86457	1.38957e-07	1.15233e-05		GAATTTATAGGAGGTTTCAAACCA	6.62737	3.77348	0.000127493	0.00865121		CGAATCCCTCTCTCGTCAAATCTCCTTT	-6.69813
GTAAAATTCGAGAAGCTGTTTAACA	9.92277	5.32867	6.1844e-09	5.00443e-07		GAAGATTTGTGGAGGTTCGCGAAT	-8.47957	4.28676	3.83246e-06	0.000269778		AAAAACAGCGGG	8.5687	3.44559	4.12415e-08	4.17359e-06		AAGGGCAAGTCTGGTGCCAGCAGCC	-5.21183	6.59688	2.40904e-05	0.00145671		TACCCGTAGTCTAATGCTGTCA	-4.29685	6.24535	4.1051e-05	0.00321051		ATTAGGGTTCGACTCCGGAG	-6.04143	5.89234	2.70174e-06	0.0002022		TTTTTTCGGTTGACTCA	5.02292	1.85166	1.39002e-07	1.15233e-05		CTGAGATCATTATGAAATCACGA	6.62737	3.77348	0.00012744	0.00865121		GAAGACAATAAATCGAGGATTCTCTGG	-6.69813
CCGGGGGAAG	-6.29989	4.72999	6.26021e-09	5.05719e-07		GAATTAGAGGATTCGGAAGTAAGGA	-8.45426	4.26231	3.83911e-06	0.000269778		GAGACCTCCTGGGAACCGTTAGTG	8.69355	3.55614	4.16584e-08	4.20863e-06		TTTGGCACCATGGGACTCTAA	4.87484	7.49018	2.43068e-05	0.00146235		ATTTTTGCGTGTGGGAGAGATGCGTTCGCGCACTCTCCCGA	-5.27758	4.67929	4.11175e-05	0.00321051		TTCGGTTGACTCAAAATATCCTTGCTGATTTTGT	6.04995	4.30444	2.71358e-06	0.00020257		GTTGTTTGAACCGGGCA	5.0487	4.06731	1.38939e-07	1.15233e-05		GAACTTTATTGTTAACAGATATAATGG	6.62737	3.77348	0.000127388	0.00865121		ATCGCTTCTCGAGCTTTTTAGCTCAGATCAAAGTGTAGTA	-5.18872
ATTACGTCCCTGCCCTTTGTAC	-7.59486	4.34801	6.27676e-09	5.06198e-07		GACATATTCAAAAACATAGGAGCA	-8.52149	4.32437	3.86068e-06	0.000270435		GCAGCCAAGTACTGTGGAATCAACG	-9.83778	5.1312	4.17392e-08	4.20966e-06		GGATCCCGTCCGAT	-8.0375	5.26568	2.42604e-05	0.00146235		GATGTCCGGGGCTG	8.38491	5.40117	4.18047e-05	0.00324219		ATTAGGGTTCGACTCCGGAGAGGGA	-8.15815	4.51904	2.71589e-06	0.00020257		CCGGATCCCGTCC	5.47859	2.28664	1.41309e-07	1.16947e-05		GATATCAA	6.62736	3.77348	0.000127336	0.00865121		TTTGAGACTAACGCTAGGGCT	-6.00148
CACACCGCCCGTCGC	-7.22263	3.99869	6.30058e-09	5.0726e-07		GTGGATGACTTTACTATCGTAGACA	-8.39684	4.21109	3.86243e-06	0.000270435		GTAAGCATCAACAAACAATTTGACAAG	-9.53374	4.83407	4.2181e-08	4.24703e-06		CTGCCCGGAACTGAGC	-9.30928	6.42079	2.42994e-05	0.00146235		TAAAGGAATTGACGGAAGG	5.76951	6.08925	4.18043e-05	0.00324219		AGTCTTTCGGTTCCGGGGGAAGTATGGTTGCA	-8.20488	4.55873	2.72856e-06	0.000203172		TTTGCGACCTATATCCAGGCCA	4.40898	3.41628	1.42143e-07	1.17219e-05		GATTTTCTTCGACGTACACTTCCGTAG	4.77712	4.4441	0.000126132	0.00865121		GTTCTGTAGAAGTACCGTTAGATTTCT	-6.81333
GGGGCTGCACGCG	-8.56626	3.49221	6.39064e-09	5.13644e-07		GGTGAATTTAGGGACAGGTCTTA	4.66167	3.72989	3.88814e-06	0.000271776		GTTATGACTGTATTCATATCTTTGTCCT	-9.42664	4.72893	4.24008e-08	4.26196e-06		TTGGATGGGAGACCTCCTGGGAACCGTTAGTG	-8.11517	5.32695	2.44049e-05	0.00146407		TTTGCGACCGAATCCAGGCCGCG	-4.90183	5.19345	4.17069e-05	0.00324219		CTCCGGAGAGAGAGT	-5.7466	5.62222	2.73737e-06	0.000203484		GTTCCGGGGGAA	5.47484	1.59854	1.42597e-07	1.17219e-05		AGGGGCG	3.50234	5.21538	0.000127657	0.00865121		ATCAGAGTTGTGTTTATGGG	-8.61515
TGGATGGGAGACCTCCTGGGAACCGTTAGTGGCGTA	-8.43125	3.36854	6.44016e-09	5.16752e-07		GCTGAGTATTCTGATCTCGTTATCGAG	-8.50129	4.30463	3.95125e-06	0.00027526		TCTTGGACCGTAGC	6.83446	3.90186	4.26638e-08	4.28117e-06		ACGGGCTTGGCAA	-8.17491	5.37888	2.44176e-05	0.00146407		GGCAGTGTGGTTAGCTGGTTG	-5.07991	6.13522	4.1606e-05	0.00324219		TCAGAGTGGCATTTATGGATA	8.20987	4.42216	2.76412e-06	0.000204782		CTTTTTGATGAGACTTTTTGACTGAGG	7.16401	1.61676	1.42586e-07	1.17219e-05		GATATACAGTCTTGAAGTAGAATTATT	4.80765	4.44602	0.000130479	0.00882751		GTTCGGAATTGGCATTTGTGAAGTGAT	-8.61515
TAGGGTTCGACTCCGGA	-7.30506	4.07539	6.4974e-09	5.20469e-07		GGTCGGGTGGTAGGAGCAAATT	-4.82791	5.71123	3.94602e-06	0.00027526		ATCGTGTCGGTG	8.72375	3.583	4.30634e-08	4.31401e-06		GATCCCGTCCGAT	-5.24033	7.01557	2.44754e-05	0.00146507		TTTGCGACAGTTGTTGGCTTA	-5.44487	7.78359	4.20148e-05	0.003253		TTTGCGACTGTATCCAAAACCCC	4.83522	6.10925	2.76265e-06	0.000204782		TTTGCACTTAGATACCTGAC	7.16402	1.61676	1.42486e-07	1.17219e-05		GTATCTGATGATCTTCTCCGAATCT	6.6949	3.82132	0.000134397	0.00903358		CCAACC	-8.61515
TGCCCTTAGATGTCCGG	-6.55411	4.64276	6.56119e-09	5.24533e-07		GATTTCGTCGTGTAGTCGGTTATCACATCTG	-6.38774	7.23048	3.96064e-06	0.00027545		GAGAAATATTCCATTGTTGCGCGAT	-9.51855	4.81826	4.36095e-08	4.36139e-06		TTAAGACACTTTACTTATTTGGATTTGTTT	8.04042	5.14249	2.47003e-05	0.00146896		TTTGCGACCGAGTCCAGGCCACG	-4.48074	5.73004	4.21196e-05	0.00325565		GAAAACATATATCCTTCCTCGGACG	8.1825	4.39642	2.77842e-06	0.000205496		TTAAAGCTTAGATCAAACGTCT	3.80993	5.65726	1.43956e-07	1.18104e-05		TGATTTTTCTAATGTACTGTTA	6.6949	3.82132	0.000134369	0.00903358		GTGATAT	-4.91079
ATTCTTGGACCGTAGCGAGA	-6.4312	4.89124	6.57014e-09	5.24533e-07		GTTTAAAAATATAGTTTCAAAATCGCC	-8.44365	4.25352	3.98432e-06	0.000276633		GAAGTAGAATTATTTGATTGGAGAAGGT	-9.29668	4.602	4.39008e-08	4.36853e-06		GAATGCACCGGATCCCGTC	-5.31988	6.18622	2.47308e-05	0.00146896		ATTCTTGGACCGTAGCGAGACG	8.31678	5.34311	4.27012e-05	0.00329508		TGGGATCAAATTAGACTTATCG	8.06765	4.28884	2.82106e-06	0.000207604		AAGCGGAGGAA	5.25335	1.42106	1.44156e-07	1.18104e-05		TGGACTAAAAGCAATTTCAGA	6.59418	3.75288	0.000134305	0.00903358		TTTGCTTATGTTTCCACGATCA	-8.50448
TGCTATGGCAAGTC	-6.773	4.29723	6.59504e-09	5.2564e-07		GAAGACGCAATTCTGTCAACTGTAGAT	-5.81378	4.56233	3.9961e-06	0.00027678		TATCACAGTTGATTTGAATTCGT	-7.94984	5.19737	4.37971e-08	4.36853e-06		GGCACGGACAAGA	-5.58376	6.41732	2.4626e-05	0.00146896		TTGGATGGGAGACCTCCTGGGAACC	8.32815	5.35329	4.29747e-05	0.00331063		TTCTTGGACCGTAGCGAGACGTCCTACT	-5.46895	5.88151	2.81733e-06	0.000207604		GCAGGCGCG	4.965	3.14807	1.47411e-07	1.20569e-05		GAGTCATTCTCTGAACTAACCTTGTT	3.81591	4.84874	0.000134424	0.00903358		GTTTTGTTGTTAATTCGAGTCTCTGAT	-8.50448
AGTCTTTCGGTTCCGGGGGAAGTATGGTTGCA	-8.54606	3.46993	6.63553e-09	5.27984e-07		GGCACGGAC	6.67971	2.04156	3.99979e-06	0.00027678		TGAGAAACGGC	8.5796	3.45521	4.38859e-08	4.36853e-06		CCCGGAACTGAGCAAT	-6.02856	6.00977	2.46831e-05	0.00146896		GAAATTCTTGGACCGTAGC	5.4042	6.6269	4.32153e-05	0.0033221		CGGGTTCGATTCCCGATAAACGCACCA	-6.43012	6.26637	2.81612e-06	0.000207604		ACTCCGGAGAGA	5.08145	1.90006	1.48011e-07	1.20858e-05		TAAGGCACGCGGTGAATGCCAA	-6.64906	3.56336	0.000135324	0.00907891		GAGACCTCCTG	6.29626
CTGGCACGGACAAGAG	-6.51765	5.27543	6.66135e-09	5.29156e-07		TCCCATGTGGTCTAGTGGTTAGGATTCG	-5.74405	6.60167	4.00669e-06	0.000276795		CCGCCCGTCGCTGCC	8.62229	3.49292	4.399e-08	4.37011e-06		TCTTGGACCGTAGCGAGACGTCCTACTGCGAA	-7.92187	5.16422	2.47879e-05	0.00146896		TTTTGGCACTTAGGAATTCC	-5.18339	4.63059	4.32677e-05	0.0033221		ATTCTTGGACCGTAGCGAGACGTCCT	-4.64874	7.08581	2.84954e-06	0.000208656		TTGGGACCTGTGTCTAAGTTG	4.3804	3.72653	1.50029e-07	1.22301e-05		TGGCAGTGTGGTTAGCTGGTTG	-3.73695	13.2926	0.00013601	0.0091097		TCTTTTTGATGAGACTTTTTGGCTGAGGA	-8.71741
CGAAAGTCTTTCGGTTCCGGGGG	-8.95533	3.84361	6.71154e-09	5.32255e-07		GATAAAAAGCTTCTTGACTGATGAGA	-9.71897	5.44313	4.06039e-06	0.000278593		GACCAAGGAGTGTAT	8.52441	3.40663	4.4342e-08	4.39775e-06		GAGTTACTCCGGAGTT	-7.94654	5.18589	2.47686e-05	0.00146896		ATAATTGAGGGTGATAT	-5.4859	5.35445	4.37061e-05	0.00335017		GGTGAAATTCTTGGACCGTAGCGAGACGT	-5.61533	6.01927	2.84835e-06	0.000208656		GCCCGTCGC	7.1958	3.15235	1.51551e-07	1.23336e-05		GGTGAATTTAGGGACGG	-6.67754	3.57941	0.000136595	0.00912122		GAGTTAAAATCACTTATTGGGTTTCGG	-8.71741
GCACAGAGTGTAACAATGGAGTCGT	9.98082	5.38606	6.73773e-09	5.33445e-07		GAAACTTTTGAAGATTGTTGTTTACT	-8.4674	4.27516	4.04659e-06	0.000278593		AGAACTGGCACGGACAAG	8.53542	3.41631	4.4424e-08	4.39857e-06		GGTGAATTTAGGGACAGGTCTTAA	8.23463	5.32277	2.50641e-05	0.00148263		TTTGCGACTGGATCCAGGCCATT	-5.91798	12.7895	4.38839e-05	0.00335821		GAACTGGCACGGACAAGA	-5.62005	6.01854	2.84653e-06	0.000208656		GCTTCTTCTTGCTCGTCTGTAAAT	-8.86376	3.92316	1.52629e-07	1.24007e-05		CGGTGAATTTAGGGACAG	-6.67754	3.57941	0.000136636	0.00912122		TGATATGTCTGGTATTCTTGGGT	-4.32773
AGAGGACGTGAAATC	-8.40558	3.34488	6.83466e-09	5.40221e-07		GCATTCTTAATCATTCTAGTTGGTA	-8.44634	4.25652	4.04076e-06	0.000278593		GATTTGTGACAACTTTGATATTACA	-9.30917	4.61396	4.45847e-08	4.40239e-06		TGTGTCTGATTTCTGCCCAGTGC	-5.09733	6.88032	2.5183e-05	0.00148263		GCGGGTTTAAGTTAAGTTTAAACTAGTGGTCTTC	-7.9947	4.78258	4.40111e-05	0.00336236		TGGATGGGAGACCTCCTGGGAACCGTT	-6.28422	5.28977	2.89528e-06	0.000211653		AAGCGGCCGATT	5.32671	1.47855	1.53564e-07	1.2456e-05		TTTATTTCAATAATATTTGTT	6.63572	3.77861	0.000139801	0.00928628		TAGGAAATGAATAAGGAGAGA	-5.0279
GAAATTCTTGGACCGTAGCGAGACGT	-8.61942	3.54093	6.9866e-09	5.51317e-07		TCCCATGTGGTCTAGTGGTTAGGATTCGTG	-4.93587	6.74635	4.06632e-06	0.000278593		GCCCGGAACTGAGCAATATCG	5.37058	4.45162	4.46103e-08	4.40239e-06		AGCGGGGAAAGA	-6.07532	6.03887	2.51543e-05	0.00148263		TGGCAGTGTGATTTGCTGGTTG	-4.36554	7.00682	4.42022e-05	0.00337137		AAACAGCGGGGA	-4.90458	6.268	2.9123e-06	0.000212545		TTTGAGACTAACGCTAGGGCT	5.33421	2.61475	1.55791e-07	1.26157e-05		GAAGATTTGTGGAGGTTCGCGAAT	6.63572	3.77861	0.000139764	0.00928628		TCGAATCGTCTAGCAGTTAATTT	-5.86328
AGGCTGGCGTA	-8.41552	3.35431	7.0086e-09	5.52139e-07		TTTTGCGTGTGGGAGAGATGCGTTCGCGCACTCTCCCGA	3.88271	4.47146	4.05533e-06	0.000278593		ATAAAAAGTGTTGTT	6.04107	4.48055	4.48087e-08	4.41466e-06		CAGTCGGTAGAGCACCAGACT	-7.98239	5.21264	2.51851e-05	0.00148263		CGAATCCTGCTGACTGCGAATTGTTTT	-6.0078	5.46733	4.46491e-05	0.00339422		ACTCCGGAGAGGGAGCCTGAGA	-8.28504	4.62777	2.98583e-06	0.000217551		AAGGATCGTGTA	5.03093	1.88007	1.57805e-07	1.27577e-05		GTAGATTTTGTAAGTTCTGAAGAAATC	6.63572	3.77861	0.000139727	0.00928628		TAACTTACTGTGGAAATTGGT	-8.54262
ATGAAACCGCGGAAAGCT	-7.28469	4.05639	7.07056e-09	5.56101e-07		GGTGACATTTTCTGATTGTGAACG	-8.42314	4.23392	4.07333e-06	0.000278613		GAATTTGTTGAAACTCCTTGAAACAA	-9.35669	4.65945	4.51182e-08	4.4305e-06		CGGCAGTGTGGTTAGCTGGTTG	7.96891	5.07671	2.5243e-05	0.00148325		TGGCAGTGTGGTTAGCTGGCTG	-6.0078	5.46733	4.46271e-05	0.00339422		TCGGTTCCGGGGGAAG	-5.72464	5.60277	3.00432e-06	0.000218537		CCGGATCCCGT	5.44303	1.56895	1.65035e-07	1.32821e-05		GCTCGATCGCATCTTATTGTTTCTGGT	4.78736	4.45139	0.00014034	0.0093067		GGGCTTGATTGTCGTTTTTGTACAAA	-8.54262
ACTCCGGAGAGGGAGCCTGAGA	-8.61851	3.53508	7.15775e-09	5.62031e-07		ATTAAACAGTTAAATTGCTCTGGAAAT	-8.43925	4.25004	4.10755e-06	0.000280491		GTTCTGTAGAAGTACCGTTAGATTTCT	-7.37527	4.63536	4.50918e-08	4.4305e-06		ATGAGCATCTTGGAT	-5.31811	7.06822	2.53033e-05	0.00148325		GATGGGAGACCTCCTGGGAAC	8.35222	5.37276	4.5008e-05	0.00341586		GTAAAATTCGAGAAGCTGTTTAACA	8.03759	4.26079	3.02309e-06	0.000219323		ACCGGATCCCGTCC	5.44303	1.56895	1.65073e-07	1.32821e-05		ATTCGGTTCATA	-3.73026	4.6943	0.000141152	0.00934507		GGCTAACACGGACAACTCAGCTACTACT	-8.54262
AGTCTTTCGGTTCCGGGGGAAGTATG	-7.06177	3.85066	7.20169e-09	5.64173e-07		GGTGAATTTAGGGCCA	7.20043	2.44634	4.1235e-06	0.0002808		GAAAAATTGTTTTGACCATTGGACA	-9.26612	4.57193	4.53136e-08	4.43507e-06		CACACCGCCCGTCGCTGCC	-8.09646	5.31067	2.53205e-05	0.00148325		GATAACGAGCG	8.42714	5.43985	4.51564e-05	0.00341587		TAGTACTTGGATGGGAGACCTCCTGGGAACCGTTAGT	-5.5018	5.3976	3.02508e-06	0.000219323		GGCGTAGTA	5.44303	1.56895	1.65107e-07	1.32821e-05		GTAAAACTCGTTGATGCTTTGCTCT	7.77172	4.712	0.000142786	0.00943775		TTTGCGACCGGATCCAGGCCACG	-5.44165
GCATTGGATTTGGAAGTTTGTAAATC	8.10862	5.86773	7.20871e-09	5.64173e-07		TGGCAGTGTGATTCGCTGGTTGA	7.20043	2.44634	4.12562e-06	0.0002808		GGGTGAAGTCAG	6.84226	3.8558	4.52444e-08	4.43507e-06		ATATATATAGGTTG	8.07573	5.175	2.56742e-05	0.00149904		AGATGTCCGGGGCTG	5.70081	6.02766	4.5155e-05	0.00341587		TGGACCGTAGCGAGACGTCCTACTGCGAAAGCATTTGCCAAGAATGTTTTCATT	-8.32946	4.68148	3.04316e-06	0.000220272		TCGTGTCGGTGGAT	4.63838	3.53825	1.68654e-07	1.3523e-05		TGAGGTAGTGTTAAATATTG	7.73037	4.63915	0.000147726	0.00969989		GTTGTTGC	-6.7363
TTGACGGAAGGGCACCACCAGGAGTGGA	-8.40959	3.34941	7.25196e-09	5.65476e-07		GATTGTTGTTTGATTGATTGTTTGATT	-8.41052	4.22381	4.17946e-06	0.000283998		GTTAGACCTGTCCATTCTTTGAACG	-9.26499	4.57118	4.54167e-08	4.43788e-06		GAAATTCTTGGACCGTA	-7.87707	5.12464	2.56631e-05	0.00149904		GTTCTACAGTCCGA	-4.61181	5.48459	4.54358e-05	0.00343137		GCCTCCGTGG	-5.37481	5.79337	3.05396e-06	0.000220691		AAGGGAAGTCGGCA	4.75162	2.42109	1.68461e-07	1.3523e-05		ACTTGTTAGAGTAAAAAAGATCTTCTT	6.65288	3.78885	0.000148683	0.00969989		TTTGCGACTGTATCCAAAACACG	-6.7363
ATTACGTCCCTGCCC	-8.40959	3.34941	7.25939e-09	5.65476e-07		ATAGGAAATGAATCAGGAGAGAA	4.41939	3.79346	4.24137e-06	0.000287733		GGACCGTAGC	8.55811	3.43625	4.54944e-08	4.4382e-06		TTTGGGAACATGTCCAGAACCTT	6.17125	9.27255	2.57491e-05	0.00150007		CTTTGCGACCGAATCCAGGCCACG	-4.76739	5.80504	4.57201e-05	0.00344719		GATTTTTTTGTAGTTCGTTTTGAAGGT	5.98855	4.2483	3.10499e-06	0.000222966		AGGTTGGAGA	4.02777	5.82089	1.69947e-07	1.36043e-05		GATATTATCATACGATTTTCTTT	6.65288	3.78885	0.000148683	0.00969989		TTTGCGACTGTATCCACATCACC	-8.57949
TTAGGGTTCGACTCCGGAGAGGG	-6.92888	4.99134	7.26095e-09	5.65476e-07		GAAATCCATGTATCGTTTTCAGGAATG	-8.35775	4.17535	4.25509e-06	0.000288192		GTATTTTTTGTCAATATCTTCTTCG	-9.56933	4.86877	4.61176e-08	4.49164e-06		GGGCGGT	-5.30957	7.35881	2.5789e-05	0.00150007		TACCATTCAGCG	8.64151	5.62874	4.58319e-05	0.00344998		TTTTGTATTGCTGAATTTTTGCTC	5.85436	7.79702	3.1066e-06	0.000222966		TGAAAGACATGGGTAGTG	4.36134	4.03691	1.70224e-07	1.36043e-05		GCATTTCTGGAGCTCCTTGTACAACT	6.59176	3.74514	0.000148498	0.00969989		GATTTGATTTGGTATTGGTAGGGCCT	-8.57949
TGGGAGACCTCCTGGG	-8.38655	3.32792	7.27689e-09	5.65793e-07		GAAAGAACGAATGACCTTACAAGAAC	-9.59589	5.33019	4.28061e-06	0.000289447		TCTGGTCGATG	8.39544	3.29387	4.6433e-08	4.51499e-06		TGCCACGCGGGAGTCCCGGGTTC	-7.94115	5.1772	2.58183e-05	0.00150007		TCGTGAGACAGGTTAGT	8.48372	5.48663	4.59437e-05	0.00345275		TTTGCGACTGTATTCACATCAC	5.51266	5.13565	3.11072e-06	0.000222966		ATACTTTATAAATCACGTCTT	6.96617	1.45251	1.72956e-07	1.37277e-05		GTGTGTGG	6.59176	3.74514	0.000148462	0.00969989		GATAGTAATATGGATACTTGTAATCGTC	-8.57949
TTCCTATGAATCCGAT	-7.13481	3.92547	7.30327e-09	5.66919e-07		GTACTGAAAGGATAAAAACGTGCCT	-9.56942	5.30014	4.3579e-06	0.000290575		GATTGTTGTACACTCCTATGATTGTGG	-9.25462	4.56099	4.66144e-08	4.52398e-06		TTGTTTGAACCGGGCA	-7.89087	5.13739	2.6006e-05	0.00150852		TGATATGTCTGGTCTTCTTGGGT	-4.49861	7.89416	4.63468e-05	0.00347737		TTCGGTTCCGGGGGAAGTA	-4.57748	7.87803	3.10961e-06	0.000222966		ATTCTTGGACC	6.96617	1.45251	1.72988e-07	1.37277e-05		GAATATGTGAACTCTTTCTGTCGTCTC	4.73084	4.40901	0.000148107	0.00969989		TTAAAGCTTAGATTAAACGT	-5.55438
CGGGCTTGGCAA	-8.41154	3.34981	7.31518e-09	5.66921e-07		GCCTGCCACGCGGGAGTCCCGGGTTCGATTCCCGGT	-8.68145	4.46901	4.36279e-06	0.000290575		GGTGAAATTCTTGGACCGT	8.50168	3.38668	4.66773e-08	4.52398e-06		TTTGCGACCTATTCATGATCAA	5.13647	6.74849	2.61281e-05	0.00151314		AGAGGGCTG	8.34969	5.37231	4.66482e-05	0.00349429		AGGAAGGCAGCAGGCGCG	-8.01011	4.39282	3.09856e-06	0.000222966		GACGGTT	6.96617	1.45251	1.73028e-07	1.37277e-05		GGATTTATTTCTTCACCTATTGTCGCT	3.92069	4.95854	0.000147019	0.00969989		GTACTTTTATAATTTCTCAAGACTGTT	-8.50385
CTCCGGAGAGAGA	-8.43906	3.37382	7.41084e-09	5.72545e-07		GAGGATATTGATAATGAAAAAACAGCT	-8.66818	4.459	4.36168e-06	0.000290575		GCAATTGGATCTGGTATTTCACTGATT	-9.30079	4.6064	4.73207e-08	4.56663e-06		GCTGGCGGCACCA	-6.13318	6.10365	2.6252e-05	0.00151784		TGGCAGTGTAGTTAGCTGGTCG	-5.02401	5.90965	4.68197e-05	0.00350144		CGGTTCCGGGGGAAGTATG	-6.18482	5.20149	3.12721e-06	0.000223783		CATTTTATGATTGCGTTATAAA	6.96617	1.45251	1.73037e-07	1.37277e-05		GCCCGCTATGGGGATTTTACATCTCCCATAGCAATTTTTGGAAGGCCGAGAGGCCTGA	-3.061	5.63414	0.00014754	0.00969989		TGAGGTCAAATTAGACTTATCG	-6.7704
ATCGAGAGGCAGGAAGAG	-8.39662	3.33747	7.44102e-09	5.72545e-07		GAAAGTCAGACTTATCATTAGTATA	-8.45522	4.26418	4.35935e-06	0.000290575		TTAGAGTCGTG	6.72235	3.80056	4.73472e-08	4.56663e-06		TACGTCCCTGCCCTT	-7.88689	5.13121	2.63481e-05	0.00152093		AGCAGAACTGGCG	8.30238	5.3311	4.72155e-05	0.00352532		GATTTTTTTGTAGTTCGTTTTGAAGGTT	6.16636	4.41077	3.13257e-06	0.000223803		TCTACCTCACATAATATCGTC	6.96618	1.45251	1.73171e-07	1.37277e-05		TGGGCTGCAGCACCGGGGGATCCGGAGTTGCCG	-6.63955	3.55802	0.000150207	0.00978339		GCATTGGATTTGGAAGTTTGTAAATC	-8.50511
TGCACCGGATCCCGTC	-8.39662	3.33747	7.44782e-09	5.72545e-07		GAAAAGAATCTTTACTGCGTACG	-8.45347	4.26243	4.3375e-06	0.000290575		GAGACCTCCTGGGAACCGT	8.53539	3.41629	4.72492e-08	4.56663e-06		CTTGGATGGGAGACCTCCTGGGAACCGTTA	-8.25415	5.44801	2.65018e-05	0.00152733		GGTGAATTTAGGGACAGGTCTTCTAAACTT	-6.66101	6.10945	4.74393e-05	0.0035363		ACAGCAGGGCG	-7.99804	4.38504	3.16675e-06	0.00022588		GTTCGTGGAT	5.16966	1.99586	1.75348e-07	1.38778e-05		GATAAATATTTGTTGGATTCTGTGTCA	6.56615	3.72946	0.000153718	0.00997974		GTAAACGGCGGG	5.78933
TGGAAGTCGGAACCC	-8.38956	3.33041	7.42717e-09	5.72545e-07		GATTTATTCTTAAACCATCGTGCAAG	-8.43211	4.24164	4.34418e-06	0.000290575		GACTGAAGACTGGTTTCATATGAACAT	-9.28551	4.59107	4.74938e-08	4.56963e-06		TTTCGGTTCCGGGGGA	-7.95291	7.81446	2.67268e-05	0.00153781		GGTGAATTTAGGGACAGGTCTTCTAAACTTGTTA	-7.85995	4.64797	4.75995e-05	0.00354251		CCGGGGCTGCACGCGCGC	-8.50112	4.81761	3.17546e-06	0.000226135		TGGCAGTGTGATTCGCTGGTTG	7.02366	3.03315	1.76393e-07	1.39379e-05		CATAAACACCACTCTGATCTACC	6.56615	3.72946	0.000153678	0.00997974		ACGCGGCCCG	5.70774
GCTGCCCGGA	-6.43143	5.1915	7.41434e-09	5.72545e-07		GACCGTTTTTTTGAGATCTTTGTCCT	-8.38856	4.20379	4.33377e-06	0.000290575		GGTGAAATTCTTGGACCGTAGCGAGACGTCCTACTGCGAAAGC	8.52444	3.40665	4.75316e-08	4.56963e-06		CCCCGCCA	-8.77666	5.92834	2.68485e-05	0.00154231		AGTTGCGAGCTATCTTAGTACTTG	5.15582	6.37657	4.78615e-05	0.00355293		TTTGCACTTAGATGCCTGACTAC	8.12616	4.34356	3.19017e-06	0.000226456		GTGAATCCGT	4.83458	2.72264	1.80185e-07	1.42146e-05								TAGAGGTGAAATTCTTGGACCGTAGCG	5.58724
GTGTAATTCTCTAGTATCGTAGAAT	9.85011	5.25822	7.4898e-09	5.74845e-07		GATAATTTGTGTCTGGATTGAGTTT	-8.34541	4.16404	4.36739e-06	0.000290575		GAAATTCTTGGACCGTAGCGAGACG	6.36702	4.26354	4.784e-08	4.59187e-06		TCGGAAACGAAAGTCTTTCGGTTCCGGGG	-5.24805	6.12163	2.69144e-05	0.00154361		TTTGTAATTTTTGGAGGCTCTCCTTCGGGGGAGCGAT	-4.58463	5.65719	4.78938e-05	0.00355293		TGGACCGTAGCGAGACGTCCTACTGC	-5.49424	5.90518	3.19024e-06	0.000226456		ATATCGTCAATATATCATTA	7.09479	1.55828	1.81817e-07	1.42742e-05		Not Significant <0.01						TGACTAGAACATTACTTTGAA	-6.86414
CTGGCACGGACAAGAGGAAT	-7.04871	3.83869	7.51756e-09	5.75124e-07		GTTCTCGGAGTATCAACTTTTGATA	-8.33777	4.15711	4.33955e-06	0.000290575		GAAATTGTTGCTTCGGTCTCACCGGA	-9.40267	4.70489	4.82983e-08	4.6155e-06		TCGGAAACGAAAGTCTTTCGGTTCCGGGGGAAGT	-5.14661	6.92792	2.71229e-05	0.00155307		AGCAGGGCGG	8.43698	5.4459	4.8238e-05	0.00356978		TTCGGTTCCGGGGGAAGTATGGTTGCAAA	-8.01556	4.39705	3.22046e-06	0.000227924		CTATATGTTGAGAATACTTTCTGAA	7.09479	1.55828	1.81808e-07	1.42742e-05		GGATGTGCATAACTACCTTGATCTGAA	6.55769	3.72422	0.000155717	0.0100538		GAGACCTCCTGG	5.82938
AGTCTTTCGGTTCCGGG	-6.54151	4.99666	7.51569e-09	5.75124e-07		GTAATTCTAATACGGTCAATGTTGTA	-8.33776	4.1571	4.36084e-06	0.000290575		GATATTGTGGTTGGCTTTGAAATGT	-9.27892	4.58416	4.82439e-08	4.6155e-06		GGTGAAATTCTTGGACCGTAGCGA	-5.20408	7.50365	2.72752e-05	0.00155928		TTTGAACCGGGC	8.3443	5.36578	4.83369e-05	0.00356978		CCGGGGCTGCACG	-8.01556	4.39705	3.22127e-06	0.000227924		CCTTATGAACTTTAATTTCTG	7.09479	1.55828	1.81635e-07	1.42742e-05		GCATTTGTCGTAGAATCTCGGTACA	6.55769	3.72422	0.000155764	0.0100538		AAAAACATTTTCAGTAGTCAA	-5.91359
GACGATATTGTAGAAATACCAACCTAC	9.98106	5.38567	7.58367e-09	5.79251e-07		GATATTCAGCAAATGTAGACTTTTGTA	-8.42218	4.23265	4.41525e-06	0.000293288		GTAGATGGAGGAGGATAATTGAGAT	-9.24578	4.55208	4.83185e-08	4.6155e-06		CCGGAGAGGGAGCC	-7.8409	5.09288	2.74131e-05	0.00156466		TGGGAACCGTTAGTGGCG	5.35446	7.11952	4.83534e-05	0.00356978		TTTACGCTTTTTAGTTAACA	8.00665	4.23202	3.23609e-06	0.000228606		GATTTTTTTGTAGTTCGTTTTGAAGGTT	4.59717	2.96848	1.85867e-07	1.45688e-05		GGTAATTGTAGTTTAAATTCTGTCATT	6.55769	3.72422	0.000155812	0.0100538		TTTGCGGCTGTATCCACATCACT	-6.84704
CCGGGGCTGCACGCGCGC	-8.82169	3.7202	7.63913e-09	5.82554e-07		GGTTTGAGCTACTTGTAGATGACG	-8.42316	4.23393	4.42396e-06	0.000293397		TAGCGAGACGTCC	8.56875	3.44564	4.84712e-08	4.62268e-06		CCGGGGCTGCA	-7.85707	5.10683	2.75302e-05	0.00156883		GGTTCCGGGG	4.30837	7.24169	4.84549e-05	0.00357156		GTCTAACTCGTTGAAATTCTGCTACT	8.00659	4.23197	3.2735e-06	0.000230345		TTTGCGAACGAATCCAGGCCACG	4.65863	2.96175	1.88552e-07	1.47332e-05		GTATAAGATTTTCTTGTATCTGAACTC	6.55769	3.72422	0.000155859	0.0100538		AGAGGCAGGAAGAG	9.08264
CTTGGACCGTAGCGAGACGTCCTACT	-8.39362	3.335	7.70321e-09	5.86381e-07		GTTGGTGATCGGTCGTAG	-13.8579	9.52302	4.44467e-06	0.000293831		GACCGTAGC	8.84601	3.69235	4.86025e-08	4.6278e-06		ACCCGCTGAACT	-4.52955	7.44216	2.76935e-05	0.00157059		TTAAGTAGTTGTGCCGTAGGTCG	-4.09834	9.19809	4.87682e-05	0.0035889		CTCCCTTGGCATGGGAGAGG	8.00659	4.23197	3.27422e-06	0.000230345		TAGACTATTCTGAAATTGTTT	8.70288	3.00806	1.88567e-07	1.47332e-05		GTAATATTCGGAAAGCGTTTTTT	5.16577	6.92376	0.000156153	0.0100566		GTTCGATTCCCCGCC	9.08264
GAAACGTTATTTTTCTTCGCGGCAG	9.96861	5.3737	7.71392e-09	5.86381e-07		GTAATATCAAAATTATTCCGTGGGAT	-8.395	4.20927	4.44236e-06	0.000293831		GACATATTCAAAAACATAGGAGCG	-9.52352	4.82263	4.90966e-08	4.64466e-06		GAAATTCTTGGACCGTAGCGAGACGTCC	-5.56938	6.42708	2.76264e-05	0.00157059		AGCGAT	-5.94447	4.61217	4.88781e-05	0.00359126		TTAGTTGGATAACTGAGGTAATTCTTGAGCTAATACACGCTTT	5.23031	7.27992	3.27639e-06	0.000230345		GGCGGGGAGTT	4.66275	2.37024	1.90923e-07	1.48506e-05		GACTATATGATCAATGGAATCTTTTTG	6.64421	3.78373	0.000158602	0.0101331		TATCTGAT	-5.49947
AGGAAGGCAGCAGGCGCG	-8.37031	3.31328	7.73057e-09	5.86711e-07		GCCAATTGGAAGATTAGCTTGTTTAGG	-8.38561	4.19992	4.49111e-06	0.000295956		GTATTGTTGTAATTTTGATCTAGTGGC	-9.2745	4.58007	4.92531e-08	4.64466e-06		ACACACCGCCCGTCGCTGCCC	-6.54922	6.48672	2.76892e-05	0.00157059		TCTTAAGCACTGGTAACAAACATATTTTATGAAAGTGTTTGGGACCTGTGTTTAAGTTG	-7.94431	4.73353	4.89704e-05	0.00359231		AAACACATGTGTTG	-8.19649	4.55064	3.39106e-06	0.000238028		GACCGTCGT	5.25915	1.42733	1.90423e-07	1.48506e-05		GTTGACTTGAACTGTTGTGGTAACT	6.64421	3.78373	0.000158559	0.0101331		TTAAGTAGTTGTGTCGTAGGTCG	-5.70167
GCCTCCGTGG	-6.29814	4.76951	7.81178e-09	5.91931e-07		GGTGAATTTAGGGACAGGTCTT	4.82081	4.7941	4.49026e-06	0.000295956		GTCTAACTCGTTGAAATTCTGCTACA	-9.27273	4.5789	4.92974e-08	4.64466e-06		ACACCGCCCGTCGCTGCC	-6.3148	6.26967	2.79905e-05	0.00158491		TTGGCATGGGAGAGGGCTGG	8.98889	5.93955	4.91287e-05	0.00359248		GATAAACGCACCA	-5.40898	5.82191	3.43169e-06	0.000240497		CGAGTCCTGTCAAGATCGTAAGAAGTTTT	5.25949	1.42702	1.90981e-07	1.48506e-05		GACCATTTGATCGAATTTCTTACATT	6.64421	3.78373	0.000158516	0.0101331		TTTATAAAGATGAAGTTTCGGA	-5.94116
TGTGATGCCCTTAGATGTCCGG	-6.14629	4.5801	7.85458e-09	5.9423e-07		TGATATGTCTGGTGTTCTTGGGT	3.99954	5.54148	4.50086e-06	0.000296128		GACACAATGTACTACAATGAATGGTA	-9.25909	4.56526	4.90603e-08	4.64466e-06		CAGTAATTGTTTAATAAAAATATAGCATTTGGA	8.04209	5.14387	2.81497e-05	0.0015914		GTCTGACACACAGAAGGTCGGC	5.89563	6.17557	4.91257e-05	0.00359248		ACCGCCCGTCGCTGCCCGGAACT	-5.73093	7.44109	3.45537e-06	0.000241771		GCGGAGG	5.22857	2.046	1.91403e-07	1.48599e-05		ATTAGGATCAACAAATGAAAGAACTCT	6.5746	3.73469	0.000158457	0.0101331		TCACCGGGTATACATTCATCAA	-7.20663
TTCGGTTCCGGGGGAAGTAT	-8.54924	3.47693	7.87989e-09	5.952e-07		GATGACTGATGTCCGGATTATTGTGTA	-8.34152	4.16019	4.53186e-06	0.000297224		GTAATACTGTTTAATTCTCTACTGATGT	-9.25774	4.56364	4.91338e-08	4.64466e-06		CGCTGCCCGGAACT	-4.5343	7.72343	2.85735e-05	0.0016077		AAGGAGTGTATTG	5.61236	5.92356	4.95537e-05	0.00361781		CACACCGCCCGTCGCT	-4.80858	6.56668	3.48553e-06	0.000243102		CACTGTT	-5.4008	4.91312	1.93577e-07	1.50048e-05		CAAAAACATTTTCAGTAGTCAA	6.5746	3.73469	0.000158379	0.0101331		CGGATATAGAAGATATGGCGAA	-8.81292
GGATCCCGTCC	-8.41791	5.14528	7.92256e-09	5.96532e-07		GGAAAACGATGAACATTTGTGTAGG	-8.32147	4.14254	4.52853e-06	0.000297224		AATGGCACTGATAGT	6.65295	4.5444	4.93251e-08	4.64466e-06		GCCCGTCGCTGC	-5.53718	8.82185	2.8492e-05	0.0016077		TGAAAGGCATGGGTAGTGAGACG	-5.15058	5.07416	5.01348e-05	0.00365445		AGGGTATTGGCCTACCATGGTTGTGACGGATA	-7.97822	4.36654	3.48794e-06	0.000243102		TGGGTAGA	4.88697	1.76268	1.96762e-07	1.52276e-05		GTAGGTGTAGTAGAATTATTTTTT	6.52863	3.70015	0.000161058	0.0102089		ATAGGAAATGAATCAGGAGAGAA	-5.42072
TTCGGTTCCGGGGGAAGTATGGTTGCAAA	-8.37336	3.31579	7.92188e-09	5.96532e-07		GCATTGGATTTGGAAGTTTGTAAAT	-8.63627	4.42878	4.55423e-06	0.000297749		CTGCCCGGA	8.31969	3.22818	4.91615e-08	4.64466e-06		GGTTCCGGCCG	-5.71517	6.53972	2.85501e-05	0.0016077		GGTGAATTTAG	-6.81008	5.40461	5.03033e-05	0.00366094		CGATCAGATACCGCCCTAGTTCT	-8.11643	4.48184	3.49093e-06	0.000243102		CAAATCACGTCGGGTTCATCAGTTTTT	4.88588	1.76319	1.98076e-07	1.5305e-05		GTAATATTCGGAAAGCGTTTTTTTAA	6.52863	3.70015	0.000160998	0.0102089		TAAGCTCGTAGCTACAGGTTTA	-6.07389
GGACGTGAAACC	-8.39558	3.33538	7.97799e-09	5.99759e-07		TTTGCGACTAAACTTAGATCA	4.58177	3.33529	4.55129e-06	0.000297749		GATGAAAGAAGCAAACACGGTTGTAGT	-9.23364	4.54053	4.95902e-08	4.65643e-06		TTACGTCCCTGCC	-7.86915	5.11892	2.88093e-05	0.00161618		TTTGACTGGGGCG	8.26234	5.29567	5.06325e-05	0.00367908		TGGCATGGGAGAGGGCTG	-8.07739	4.44825	3.50111e-06	0.000243427		TGATATGTCTGGTGTTCTTGGG	4.46793	2.39767	2.00809e-07	1.54917e-05		GAAGTCTCAACTTCGTCGGTCGAAGGG	6.52863	3.70015	0.000160939	0.0102089		CCAGCAGCCGCG	8.9002
ACACCGCCCGTCGCTGCCCGGAAC	-8.77835	3.68044	8.00051e-09	6.00505e-07		GACATCGGTGTTGTTCTTGTAGAATT	-8.36904	4.18594	4.584e-06	0.000299223		ACATTAGTGG	8.16955	3.09919	4.96063e-08	4.65643e-06		GAGGTGAAATTCTTGGACCGTAGCGAGACGT	-8.00348	5.2363	2.89057e-05	0.00161618		TAGAGGAATAGGG	8.34499	5.36839	5.13256e-05	0.00372357		TTAAGTAGTTGTGTCGTAGGTCG	6.58914	4.87418	3.51433e-06	0.000243578		AGGGA	4.91257	2.81603	2.0454e-07	1.57547e-05		GATTGATTGTTTGATTGTTGTCTTTTG	6.52863	3.70015	0.000160892	0.0102089		AGCTATGATGTAACTATAATGAGCCTGATCTATTTGATGTGAATTCCGCTTCTGAGCT	-5.89084
GTCTTTCGGTTCCGGGGGAAGT	-10.3511	5.17332	8.16221e-09	6.11678e-07		GTAGCATCGTCATCATTCGTTCGGGT	-8.41053	4.22383	4.59692e-06	0.000299595		GCTGGATATTGAAACTTTTCTTCTGAA	-9.26587	4.5722	4.98566e-08	4.67257e-06		TGTCCGGGGCTGCACGC	-8.08807	5.30293	2.88596e-05	0.00161618		TGGACCGTAGCGAGACGTCCTACTGCG	8.26482	5.29773	5.14426e-05	0.00372594		GGTATTGAAATTCTGAACATTAACATT	5.95695	4.21928	3.50956e-06	0.000243578		TGGCAGTGTAGTTGGCTGGTTG	5.17896	2.8497	2.16917e-07	1.66818e-05		GAATGAGGGACATGATATGAACTAACT	6.52863	3.70015	0.00016089	0.0102089		GACAATAAATCGAGGATTCTCTGGATT	-8.46595
ACGGCGGGAGT	-6.01254	8.55886	8.23173e-09	6.15919e-07		GGGGATATAGCTCAGCGGTAGAGCATGT	-4.66712	7.38938	4.60665e-06	0.000299758		GCATAACAGTAGAACTTCCGTCAACG	-9.3133	4.61848	5.01797e-08	4.69547e-06		TGATTACGTCCCTGCCCTTTGTACAC	-8.08807	5.30293	2.88846e-05	0.00161618		GTGAGTTAGTCG	4.40039	7.14997	5.152e-05	0.00372594		TTAGATGTCCGGGGCTGCACGCG	-8.12159	4.48586	3.52258e-06	0.000243766		GTCTTACG	4.32574	3.31565	2.23129e-07	1.71326e-05		GAGAAAAAATAATTTTGTTTGGTCGTT	3.94249	4.97492	0.0001615	0.0102208		GTAAAACTCGTTGATGCTTTGCTCA	-8.54293
GTTGTTTGAACCGGGCA	-6.79884	6.61148	8.3396e-09	6.23013e-07		GTCGAATTAGATTATTTCAGTAGGATTATTTC	-5.74438	5.36072	4.61483e-06	0.000299819		CTGGGAGTG	8.71417	3.57445	5.03411e-08	4.70318e-06		TTTGCGACTGTATCCAAAAC	5.82203	5.65737	2.96971e-05	0.00165782		CAGCCGCG	8.58849	5.58198	5.24611e-05	0.00378805		TCTTGGACCGTAGCG	-5.25744	6.80671	3.53833e-06	0.000244472		TTTGCTTATGTTTCCACGATCAA	5.88214	4.40518	2.25958e-07	1.73226e-05		TCGAATCCTGCCAGGATCGTTATCTTT	3.70759	5.13879	0.000163202	0.0103122		TATTTATCAATAACTTACTGTG	-8.54293
TGGCACGGACAAGAGGAATCC	-8.36114	3.30573	8.42723e-09	6.27592e-07		GTCCTTGTCGTGGAGATCGTGCC	-8.6695	4.45943	4.64286e-06	0.000301169		GATGTAGAATCTTGGTTTAATTTTGCT	-9.24571	4.55232	5.12874e-08	4.77662e-06		CGGAAGGGCACCACCAGG	-5.32937	6.19441	2.97826e-05	0.00165999		GGAGTGGAGCCTG	5.68971	5.99172	5.26849e-05	0.00379826		TGAGATCAAACTAGACTCATTA	5.50542	5.47691	3.55324e-06	0.000245118		TGATATGTCTGGTGTTCTTGGGT	3.874	4.65128	2.28457e-07	1.74868e-05		TCAATAACTTACTGTGGAAAT	6.54912	3.71897	0.000165737	0.0104242		GGAATTTTGAGAGATGTTTAAGGGCT	-8.46627
TTCGGTTCATAGGT	-5.94027	4.93668	8.41863e-09	6.27592e-07		GCCTGCCACGCGGGAGTCCCGGGTTCGATTCCCGGTC	-6.04064	5.62156	4.66343e-06	0.000301581		GGAGACCTCCTGGGAACCG	8.54646	3.42602	5.12686e-08	4.77662e-06		GCTAAGGATCGTGTA	-5.25547	6.12975	2.98694e-05	0.00166223		AGAGGCAGGAAGAG	5.74208	6.06471	5.30228e-05	0.00381665		ACTTGGATGGGAGACCTCCTGGGAACC	-6.3802	5.37552	3.64232e-06	0.000250871		CGGGC	4.94962	2.58992	2.33025e-07	1.78086e-05		GATTCTTTTGACTGAACTTTAGACAATT	6.54912	3.71897	0.000165744	0.0104242		GTTAAAAATTGGTAGTAACTCTATATT	-8.61545
AAGTCTTTCGGTTCCGGGG	-7.58992	4.34349	8.44519e-09	6.27948e-07		TAGCAGTGTGGTTAGCTGGTTG	5.30021	2.94073	4.66377e-06	0.000301581		GTTTGAAGCATTTTTCATTGATCTGGT	-9.40208	4.70388	5.17769e-08	4.79225e-06		TGATATGTCTGGTCTTCTTGGGT	5.51348	7.56195	3.00605e-05	0.00166465		TAAGTGAATGCTTTGCCACAGTCT	-6.03239	7.03915	5.31373e-05	0.00381892		GATAGCAAGTCCATTGTAGATATTGTC	8.12611	4.34352	3.6669e-06	0.00025217		TGACTAGAACATTCCTTTGAA	5.17555	1.34549	2.34934e-07	1.79025e-05		GTGTATGTAGTTTATTCTTTTCTTCCC	6.54912	3.71897	0.000165751	0.0104242		GGTAATTTCGTTTTCACTTTGACTTCT	-8.61545
TTAGGGTTCGACTCCGG	-8.35696	3.30101	8.563e-09	6.35716e-07		GTGACGTCTTTTCTGATTGTAGGA	-8.4595	4.26882	4.67453e-06	0.000301806		GAAATAGAACGCTGACTCTGCAAAGTC	-9.33102	4.63512	5.16943e-08	4.79225e-06		CCGCCCGTCGCTGCCCGGAA	-6.07443	6.89568	3.00998e-05	0.00166465		GATGTAGACTGTGTCTGATTTCTGCCCAGTGC	8.25937	5.29392	5.35266e-05	0.00383537		AGAGGGCTGGGGTTCG	-8.16456	4.52255	3.72278e-06	0.000255613		CCCGGGCCGGAC	5.17555	1.34549	2.34986e-07	1.79025e-05		GTACTACAAGAGGACTGAAGATAGCA	6.58311	3.73992	0.000169319	0.0106319		TGATATGTCTGGTATTCTTG	-4.45471
TTTTGTATTGCTGAATTTTTGC	7.17366	6.30787	8.71523e-09	6.46012e-07		GGACGTAAGAAGTGTCACTGTAGACA	-8.31661	4.13805	4.71637e-06	0.000303981		AAAGAAGACCCTGTT	6.66326	3.75553	5.17276e-08	4.79225e-06		GATTCCCCGCCA	-7.82453	5.07878	2.99625e-05	0.00166465		AATCGCTGTTGTTTGAACC	5.09107	6.83191	5.35326e-05	0.00383537		TGTGACCGTTATAACGACTATTC	8.09709	4.31637	3.75549e-06	0.000255789		CAGCGGGGAAA	6.86861	1.37513	2.38488e-07	1.80848e-05		ATTTTTGGAGGCTCTCCTTCGGGTGAGCGAT	-3.76941	4.43833	0.0001704	0.0106831		GAAAGAAGACCCTGTT	8.90643
GGACCGTAGC	-7.81872	2.83021	8.91908e-09	6.60095e-07		GGCTTAGTGGTCTAGTGGTATGATTTTCG	-5.38597	6.24264	4.72289e-06	0.000303981		GAATCCGACTGT	7.03658	5.83051	5.16778e-08	4.79225e-06		ACTCACCCGGGCCGGAC	-8.47136	5.64032	3.00385e-05	0.00166465		TGGCAGTGTGATTAGCTGGTCG	-4.8941	5.18668	5.38795e-05	0.00385422		TTTGCGTACATATTTCTGAAC	5.98889	4.24812	3.78968e-06	0.000255789		CTCTGGTCGAT	6.86861	1.37513	2.38423e-07	1.80848e-05		GCGGGGAA	3.19229	5.69501	0.000172654	0.0108076		TATAATTGAGGGTGATAT	-5.7458
AAGAACTGGCACGAACA	-7.87017	2.8742	9.08738e-09	6.71508e-07		GGTTAATTTGAGTTACATTGTTGGCA	-8.30973	4.13156	4.82574e-06	0.00031012		GATGTTTTTTCCATATTGCGCGATG	-9.36403	4.66813	5.2348e-08	4.79687e-06		TCGGAAACGAAAGTCTTTCGGTTCCGGGGGA	-7.83696	5.0912	3.02517e-05	0.00167046		TGGCAGAGTAGTTAGCTGGTTG	-4.8941	5.18668	5.39696e-05	0.00385468		GTAAATATCTGGCCAGTTGTTTATGAC	5.98888	4.24812	3.78807e-06	0.000255789		ATGAAGTTTCGGATATAGAAG	6.86862	1.37513	2.38246e-07	1.80848e-05		CAGTAATTTGTTTAATAAAAATATAGCATTTGGA	-6.58566	3.5114	0.00017547	0.0109667		AAAGATCAGAGTCGTGTTTATG	-7.41919
AACGGGCTTGGCAA	-8.51965	3.44557	9.15224e-09	6.75254e-07		GAGTACAACTTGAATTCCACATAGTGG	-8.40871	4.22203	4.86457e-06	0.000311648		GTTAAGAATCTTGAATGAACGATGG	-9.31813	4.62282	5.25831e-08	4.79687e-06		AATTCTTGGACCGTAGCGAGACG	-7.84895	5.09867	3.05621e-05	0.00167719		AGACCTCCTGGGAAC	8.57233	5.56384	5.40653e-05	0.00385554		GTTTCTAGCAGATGATCGTTTGACGCA	5.71528	4.74419	3.77732e-06	0.000255789		GTAGTAGAGCA	6.86861	1.37513	2.38948e-07	1.80916e-05		GACTGGAAACTTTTAGTTGAAATAGG	6.70434	3.83978	0.00017704	0.0110477		AAGAACTGCCTTATGAACTTT	-8.50542
AGGGTATTGGCCTACCATGGTTGTGACGGATA	-8.34462	3.29086	9.18467e-09	6.766e-07		CATTT	4.38241	3.43465	4.86269e-06	0.000311648		GCATACGTCAAGCATCTTTTGAACG	-9.30315	4.60869	5.26805e-08	4.79687e-06		ATTGACGGAAGGGCACCACCAGGA	-7.93169	5.16864	3.05263e-05	0.00167719		GAGAGGCCCCG	5.75957	6.08045	5.42393e-05	0.00386197		TATTATGCAAAGTAGAGTGCA	4.51846	7.95635	3.77248e-06	0.000255789		TTTGCGACTGTATCCAAAACCA	5.1641	1.35516	2.40628e-07	1.81626e-05		GTTTAATTGACGCCAGTCTTTGCCAGG	6.53743	3.70546	0.000177469	0.0110573		ATTAAACAGTTAAATTGCTCTGGAAATG	-8.50542
AAAGTCTTTCGGTTCCGG	-6.64159	4.22071	9.27396e-09	6.82123e-07		GCAGCTAAAAAGCACCTTGACGTTGTG	-8.29514	4.11875	4.8802e-06	0.000312167		GCTTGTCGTTTTATAAAATATTTATTT	-9.25648	4.56309	5.25306e-08	4.79687e-06		GAAGGCGATCAGATACCGCCCTAGTTCT	-7.93169	5.16864	3.05313e-05	0.00167719		CATGTCTGGCGGG	5.34741	6.575	5.49171e-05	0.00389414		ACTGT	-4.50945	7.97923	3.73959e-06	0.000255789		TCGAATCGTCTAGCAGTTAATTT	5.21555	2.50709	2.40278e-07	1.81626e-05		GTCATTTATTATCTTGTACATATCTGG	6.77477	3.89603	0.00017795	0.0110593		TCGAGTCCCATCGGAATCGTTGACCTTTT	-8.50542
TGCACCGGATCCCGT	-8.34151	3.28831	9.3106e-09	6.83135e-07		AAACAAATTGAAGAAAACACTGAATTT	-6.02807	4.7791	4.88998e-06	0.000312311		GTATATATTGTATTTCGGGTTGACT	-9.21437	4.52185	5.27053e-08	4.79687e-06		CCGGGGCTGCACGCGCGCTAC	-8.29687	5.48528	3.04919e-05	0.00167719		ATATGTTGAGAATACTTTCTGAACTC	-4.49941	5.37939	5.49447e-05	0.00389414		GGGGCTGCACGCGCGCT	-4.84285	6.75988	3.73314e-06	0.000255789		CTCGTCGGGT	5.29678	2.9535	2.41738e-07	1.82182e-05		TGGCAGTGAGGTTAGCTGGTTG	-6.6878	3.58476	0.000178052	0.0110593		GATTGTTGTTTGATTGATTGTTTGATT	-8.75014
GGCACCACCAGG	-7.12852	3.91718	9.31639e-09	6.83135e-07		GTAGCTTTACTATAGATTTGAATTGGT	-8.32043	4.14118	4.90373e-06	0.000312707		AGTCTTTCGGTTCCGGG	6.03184	4.84085	5.20814e-08	4.79687e-06		GAAATTCTTGGACCGTAGCG	-5.19888	6.07779	3.06803e-05	0.00168109		TCACTGTT	-5.4523	5.32115	5.49294e-05	0.00389414		ACCGCCCGTCGCTGCC	-4.87972	6.45172	3.78759e-06	0.000255789		TGGACCGTAGCGAGACGTCC	4.81432	1.70416	2.46377e-07	1.85393e-05		GCGGGTTTAAGTTAAGTTTAAA	-7.23725	4.02265	0.000181818	0.0112758		GATACATGACTTCGTCTTTTGGAACT	-8.75014
TGCTGGCGGCACCA	-8.36311	3.30607	9.33838e-09	6.83695e-07		GTAGTTTTCATTGTCTTGAAGGAGG	-8.48036	4.28793	4.9209e-06	0.00031332		TGAGAATCTTGTGGAC	6.23384	4.10033	5.2712e-08	4.79687e-06		CTGTTGTTTGAACCGGGCA	-5.95083	5.92722	3.11961e-05	0.00170132		GTCTTACGCTCATCTCC	-5.27501	5.15569	5.55748e-05	0.00393275		GCCCGGAACTGAGCAAT	-5.95083	5.80779	3.7499e-06	0.000255789		CTGGCACGGACA	4.33769	4.6338	2.4731e-07	1.85555e-05		TGGCAGTGTGATTAACTGGTTG	-4.78625	3.7459	0.000183739	0.0113774		TTAGTTGGATAACTGAGGTAATTCTTGAGCTAATACACGCTTTTT	-6.0763
CGGTTCCGGGGGAAGT	-8.29036	6.70737	9.38535e-09	6.83983e-07		GAAAAGAATCTTTACTGCGTACGGA	-8.29807	4.12132	4.92881e-06	0.000313342		AAGTCTTTCGGTTCC	8.18328	3.11095	5.25445e-08	4.79687e-06		AAATTCTTGGACCGTAGCGAGACGTCCT	-5.99373	5.97743	3.12884e-05	0.00170132		GATTCCG	-4.29509	6.10602	5.62038e-05	0.00397116		GCCCGTCGCTGCCCGGAACTGAGCA	-6.41207	6.2391	3.79497e-06	0.000255789		TGATATGTACAGTCATTCTG	4.68269	2.01736	2.4773e-07	1.85555e-05		ATAGGAAATGAATAAGGAGA	3.62597	7.60393	0.00018494	0.0114342		TTTGCGATTTTTTCCAGCGCTAC	-5.36221
GATCAGATACCGCCCTAGTT	-7.85784	2.86443	9.38105e-09	6.83983e-07		TCCCATGTAGTCTAGTGGTTATGATTT	-8.99395	4.75794	4.95775e-06	0.000313607		ATGGGAGACCTCCTGGG	8.23909	3.15876	5.23029e-08	4.79687e-06		TCACCGGGTGAACAAATTCTCA	-7.88894	5.13207	3.12449e-05	0.00170132		GCGGGTTT	-4.39305	6.41559	5.66311e-05	0.00399522		TAAAACACATGTGTTG	-8.03728	4.41388	3.78688e-06	0.000255789		GTTAAGCGGAGGAA	4.8795	1.75745	2.4762e-07	1.85555e-05		TTTGGAGGCTCTCCTTCGGGGGAGCGAT	-2.78202	7.29559	0.000186507	0.0115133		TGCGATCAAATTAGACTTATCG	-8.46692
CCCGTCCGATCT	-7.76538	2.78483	9.36195e-09	6.83983e-07		GTTACTAGTAGGAGATGAGATACA	-8.3633	4.17958	4.97837e-06	0.000313607		GTTAGAGGTTCG	8.47871	3.36655	5.25172e-08	4.79687e-06		GCCCCCTGGAG	-7.90442	5.15	3.12704e-05	0.00170132		GCGGGTT	-4.05889	6.60142	5.67551e-05	0.00399785		CTTGGATGGGAGACCTCCTGGGAACCGTTAGT	-8.83161	5.13547	3.77093e-06	0.000255789		CCGGAGAGGGAGC	4.46531	1.83541	2.53088e-07	1.89278e-05		TGTTTTGGATATACAGGATATG	7.82327	4.75695	0.000197645	0.0117246		ATAAAATCGTG	-5.14006
GCATTGACGATTTTCTTGTAGACTATT	7.95097	5.67433	9.45851e-09	6.88262e-07		GTCAATGAGAATCAAAAATGGCTTGG	-8.32254	4.14393	4.96399e-06	0.000313607		GATCCCGTCCGA	8.59044	3.46477	5.20597e-08	4.79687e-06		ATGTCCGGGGCTGCACGCGCGCTAC	-8.28035	5.47068	3.12166e-05	0.00170132		CAGTGGAAGCGTGCTG	8.23029	5.26833	5.68744e-05	0.00400014		ATAGGAAATGAATGAGGAGAGAA	5.98938	4.24848	3.8114e-06	0.000256505		GCATGAGAGACGTA	4.29702	2.02783	2.57503e-07	1.91471e-05		TACCTCACATAATATCGTC	7.68531	4.60003	0.000196493	0.0117246		GTAATATTCGGAAAGCGTTTTTTTAAA	-6.66053
GAATCCGACTGTCT	-7.11814	3.91065	9.49813e-09	6.89747e-07		GCTTTTCAATTATGTAGATAAATAACT	-8.31952	4.14061	4.97636e-06	0.000313607		GATTGTGTCATAGAATTCGAAACT	-9.24414	4.55099	5.28307e-08	4.80034e-06		TGGCGGTGTGATTAGCTGGTTG	7.97237	5.07956	3.13781e-05	0.00170141		TGTGATGCCCTTAGATGTCCGG	8.21038	5.2511	5.71921e-05	0.00401234		GGAACTTCGAAGATCTTTGTAACT	8.03729	4.26057	3.84021e-06	0.000258049		TTTGCGACTGGATCCAGGACATT	4.6383	1.96781	2.57779e-07	1.91471e-05		TTAGTAAGATTCATTGAATACC	6.62055	3.77577	0.000194143	0.0117246		TACCCGTAATCCAATGCTGCAA	-4.25067
GTAGTCTGTTCTTGGATTTGGAACT	9.74592	5.15697	9.50786e-09	6.89747e-07		AACCGCGGAA	5.35184	2.33099	4.96139e-06	0.000313607		GCCAATTGATCGTCATCTGTGTAGAG	-9.22566	4.53258	5.30326e-08	4.81136e-06		CTGGCGGGGAGT	-6.43954	7.22015	3.13856e-05	0.00170141		GATGTAGACTGTGTCT	4.67483	6.47389	5.7275e-05	0.00401234		CCCGTCCGATCTCCG	-6.2408	5.24948	3.88985e-06	0.000260987		TGAGATCATATTAGACCCA	7.02166	1.49762	2.57977e-07	1.91471e-05		GATTACTTCTTTTGTCGACTGAAAGGCT	6.51994	3.69482	0.000198975	0.0117246		TATGGTCTAGCATGG	8.83685
AAATTCTTGGACCGTAGCGAGA	-7.85371	2.86117	9.53119e-09	6.90388e-07		GGTGAATTTAGGGTCAGG	6.99793	2.29174	4.97529e-06	0.000313607		GTAAAATATACTTAGCTGAACGCCG	-9.21486	4.52247	5.37652e-08	4.87041e-06		GCCCGTCGCTGCCCGGAACTGAGCA	-5.68726	7.04818	3.19092e-05	0.00172455		TTACCA	-7.8378	4.63032	5.73092e-05	0.00401234		TTGAGATCAATGGGAATCTTCA	4.38735	7.85806	3.93714e-06	0.000263759		TTTGTAGATGTATTTTAACATC	7.02166	1.49762	2.57843e-07	1.91471e-05		GCAAGTACGTCGCACATTTTTCTTGAT	6.51994	3.69482	0.000198951	0.0117246		GCGACGTGG	5.43646
TGAGATTCTCTTTTCTTCATTCAA	7.0565	6.53453	9.58912e-09	6.9353e-07		GTTGACATTATGTAGTAGTTCTAGACT	-8.33103	4.15073	5.01046e-06	0.000314672		TTCATTGTCCAGCGTTGAACCG	-6.9631	6.43409	5.40476e-08	4.88705e-06		TCTTTCGGTTCCGGGG	-5.95452	5.94245	3.18774e-05	0.00172455		GATCCCGTCC	5.64335	7.78838	5.77567e-05	0.00403753		TTTCACCTGTCTTTCCAAGA	8.00689	4.2322	3.97302e-06	0.000265756		CGAATCCCACTCTCGTCAACAATTCTTTT	7.02166	1.49762	2.57819e-07	1.91471e-05		AGCAGTGTTTCTATTGTTCGTGAAGGT	6.51994	3.69482	0.00019891	0.0117246		TGACTAGAACATTACTTTGA	-4.61538
GTAATCTTTAGAACCTTTTGGAGCT	9.82468	5.2335	9.61725e-09	6.94511e-07		CTTTA	4.67116	2.36135	5.00947e-06	0.000314672		CGTTTGATCGAGCTTTAAATA	-6.5115	5.44962	5.41128e-08	4.88705e-06		CTGGCACGGACAAGAGGAATCC	-5.01694	6.78884	3.21162e-05	0.00173311		GCGACGTGGG	5.24977	7.02222	5.85939e-05	0.00408985		TTTGGGACCTGTGTTTAAGTT	4.61853	7.29599	3.97901e-06	0.000265756		TTAAGTAGTAGTGCCGCAGGTT	4.85878	5.3666	2.61942e-07	1.94119e-05		TGGAAGAAAAGAAAGATCAGAG	6.51994	3.69482	0.000198869	0.0117246		TCTGGGATTGTTTATCTTGGT	-5.61991
TAAAACACATGTGTTG	-8.3855	3.3258	9.67805e-09	6.97038e-07		GTTGATAAGTAACTAACCATTGTTGGCT	-8.48318	4.28916	5.04267e-06	0.000316216		GAATCTCTTTTGTTACTGTGAAACG	-9.21787	4.52551	5.46942e-08	4.93207e-06		CGGGCCGGA	-7.79552	5.05442	3.22085e-05	0.00173546		TGGTTTTCACCCACGCGGCCCG	8.53047	5.52707	5.89278e-05	0.00410694		GGCTGCACGCGCG	-7.95246	4.34339	3.98669e-06	0.000265866		TATTGCACACGTCTCGGCCTGA	4.83432	2.72279	2.62559e-07	1.94282e-05		ATTTCAGAACAGTCTATGTGC	6.51994	3.69482	0.000198828	0.0117246		TTTTCGGTTGACTCAAAATATCCTTGCTGATTTTGT	-6.74308
TACGTCCCTGCCCTTTGTACACACCGCCCGTCGCTGCCCGGAACT	-7.88509	2.88767	9.70559e-09	6.97038e-07		GCTTTAATGGAACTCTTTGATTGATG	-8.38488	4.2008	5.05175e-06	0.000316307		GATTTGGACTTCATTATTGCGAAGG	-9.31599	4.62125	5.50269e-08	4.95459e-06		GCCCGGAAC	-4.66583	7.84709	3.26458e-05	0.00175108		CCAGCAGCCGCG	5.55429	5.89726	5.99403e-05	0.00416235		AAAACAGCGGGGAAA	-4.71812	6.30268	4.02653e-06	0.000268117		CTAAAAGCAATTTCAGAACAG	6.94393	1.43461	2.62982e-07	1.94301e-05		ATCCTTTTTAATTGTCAGGGTGAGAATT	6.51994	3.69482	0.000198788	0.0117246		TTTAGTTGGATAACTGAGGTAATTCTTGAGCTAATACACGCTTTTT	-6.74308
GTATCCGCGCCTGTC	-7.88509	2.88767	9.71073e-09	6.97038e-07		GAAGAACTCCTCAACAGGTCGAAGT	-8.40779	4.22144	5.06025e-06	0.000316361		GTAAGAGATAGGGATTTTGTGAATT	-9.36166	4.66536	5.53144e-08	4.97056e-06		TCGGAACCCGCT	-5.9442	5.92143	3.26009e-05	0.00175108		GGGGCATTCGTATCG	5.3428	6.57089	5.99939e-05	0.00416235		GTTTTCTCTAGAATGTCGGATCCTATT	8.31427	4.52074	4.06829e-06	0.000269676		TTTGCACTTAGATGCCTGACTAC	4.95588	2.90157	2.64479e-07	1.95112e-05		GAACAGTAACTTGACCGAAGTGACT	6.51128	3.68949	0.000197502	0.0117246		GTCTTTGTCGAAGTAATTGAAACTACT	-8.42702
GCATGTGGCACCA	-6.99665	3.79702	9.68547e-09	6.97038e-07		GAAAGCATTTTAAGATTTTTCGACG	-8.31283	4.13495	5.08714e-06	0.000317563		CGGACAAGAGGAATCCGACTGT	8.46705	3.35635	5.53711e-08	4.97056e-06		AAAAAGCTCGTAGTTGGATTAT	-7.87307	5.12292	3.26436e-05	0.00175108		GGCGACGTGG	4.90234	8.03695	5.99763e-05	0.00416235		GTGATGCCCTTAGATGTCCGG	-4.86543	6.78244	4.0652e-06	0.000269676		CGAATCCGGTTGGTTGGAGATTTTT	4.35554	1.72436	2.6934e-07	1.98399e-05		GTTAAGTTTATCGTCATATTCATAATA	6.51128	3.68949	0.00019756	0.0117246		GATATGGAAATAAAATTAATTTGTTTGG	-8.42702
GGGAGACCTCCTGGGAACCG	-7.88102	2.88444	9.79573e-09	7.02081e-07		GTATAATTATAGACTGTTGAGAATA	-8.34552	4.1648	5.14626e-06	0.000319809		GTTTTTATAATCTAGTTCTAGTTCGGA	-9.21531	4.52307	5.55474e-08	4.97889e-06		CGGGCCGGACACT	-5.59392	6.97268	3.27661e-05	0.00175415		TTTGCGACTAAACTTAGATCA	-4.74472	5.35459	6.07491e-05	0.00420208		GAGAGGCCCCGGT	-5.73254	5.6121	4.05716e-06	0.000269676		CGGGT	4.49732	3.06567	2.71627e-07	1.99782e-05		GTACAATTTTTAGTATTCTGATTCACA	6.51128	3.68949	0.000197618	0.0117246		GAAGTTGTAGAGAAGATGTTA	-8.42702
AATCGGTCGTCTGAC	-8.52925	3.45919	9.9085e-09	7.03791e-07		GATAGATTTAGCAACATCGTCGATTGG	-8.32439	4.14511	5.14092e-06	0.000319809		AGTGAGAATCTTGTG	6.62829	3.72429	5.56615e-08	4.98162e-06		CGCCTTCCAAGCGGCCGATTCGGGTTC	-8.31779	5.50357	3.28016e-05	0.00175415		CGAATCCCACTCTCGTCAAGAACCTTTT	-4.92849	5.2195	6.0667e-05	0.00420208		TACTGGCCTTCAAACTTCTTAACT	9.82651	5.98948	4.147e-06	0.000272543		TACCCGTAATCCACTGCTGCAA	5.28389	1.42367	2.76309e-07	2.02921e-05		GATATGATCACTGGTAAAAAGACCACT	6.51128	3.68949	0.000197675	0.0117246		ATATCCATAAACACCACTCTG	-8.42702
ATCGTGTCGGTG	-8.45443	3.39134	9.87952e-09	7.03791e-07		TGGCAGTGTGGTCAGCTGGTTG	4.3045	3.53989	5.13431e-06	0.000319809		GAACGTAACTATGGTCAATCTCTGGAT	-9.26424	4.56996	5.64308e-08	5.0144e-06		TTGACGGAAGGGCACCACC	-5.93423	5.92414	3.29017e-05	0.00175686		TGGCAGCGTGATTAGCTGGTTG	-4.81917	5.14878	6.09117e-05	0.00420702		GTTGATATAATACCACATTTACTCTGA	7.97485	4.20254	4.12626e-06	0.000272543		TTTGCGACATACTCAGATCA	4.0598	5.74262	2.77415e-07	2.03428e-05		GAGAAACTGCAATTATAAGATAAAAGG	6.51128	3.68949	0.000197733	0.0117246		GTTATGACTGTATTCATATCTTTGTCCT	-8.50574
CCTCCTGGGAACCG	-7.82589	2.83752	9.89165e-09	7.03791e-07		GGTACACTGGGTCTTCTGATAACT	-8.40771	4.2194	5.17817e-06	0.000320948		GCTTCAAGACAAGGTAAAGGAACTA	-9.22662	4.53352	5.62611e-08	5.0144e-06		GATGTCCGGGGCTGCACGC	-6.07092	6.04685	3.29588e-05	0.00175727		CCGATAACGAGCG	8.30901	5.33737	6.12329e-05	0.00422287		GCTCTTATAAGACAATCAAATCGTGTT	7.97485	4.20254	4.1324e-06	0.000272543		TTCGCGACTGGATCCAGGCCATT	4.56139	2.25881	2.79571e-07	2.04702e-05		GGAGGAACATGAAACATTGATGGAGAT	6.51128	3.68949	0.000197791	0.0117246		CTATATGTTGAGACTACTTTCTGAACT	-8.50574
AAATTCTTGGACCGTAGCGAGAC	-7.8145	2.82687	9.89403e-09	7.03791e-07		GTTTATAAGTATCTGAATGCAAAGC	-8.33189	4.15126	5.18007e-06	0.000320948		GAAAAAAATATTTCGGGCAGTAGAAA	-9.2047	4.5123	5.63258e-08	5.0144e-06		TAGGGTTCGACTCCGGAGA	-5.21493	7.29149	3.31093e-05	0.00175741		GGAGTTTGACTGGGG	8.28697	5.31614	6.19151e-05	0.00425774		GAACTGTAAACCTGCCTTAACAGATTT	6.11007	4.35845	4.14865e-06	0.000272543		GGTCCGATTCCCG	-9.78798	4.78533	2.84563e-07	2.08046e-05		GAAAAATCAATCATGACTTGGACTA	6.51128	3.68949	0.000197849	0.0117246		GATATTGTAGCCAACTGAAATAAGGCA	-8.50574
AAGGAATTGACGGAAGGGCACCACC	-7.80179	2.81685	9.88368e-09	7.03791e-07		GTATTTTCTCAACAATCGTCTAGA	-9.39054	5.13482	5.19391e-06	0.000321325		GCTAAGTATTTAATTGTTGTTGTTGTT	-9.19484	4.50292	5.6362e-08	5.0144e-06		TCTTTCGGTTCCGGGGG	-6.09238	6.06634	3.30285e-05	0.00175741		GTTCCGGGGGAAG	5.57303	5.88839	6.19234e-05	0.00425774		GAAGACTTGACCAGTAGATGATATGAT	5.52378	4.62	4.14345e-06	0.000272543		GAAAGATCAGAGTCGTGTTTA	8.0237	2.40268	2.90655e-07	2.12183e-05		TCCGATGGTCTAGTGGTTAGGATTTGTGGCTCTC	6.51128	3.68949	0.000197906	0.0117246		GTTTAATCTGGGAATACTAAACGTAAG	-8.50574
CTCCGGAGTT	-7.80179	2.81685	9.88733e-09	7.03791e-07		CGAATCTCGTCCCAAACGTACCTTTT	4.58089	2.67316	5.2265e-06	0.000322859		TAGCTGGACCAG	8.67395	3.5387	5.64484e-08	5.0144e-06		GCCCGTCGCTGCCCGGAA	-7.89488	5.13691	3.30685e-05	0.00175741		GTAGGGTATTGGC	8.38328	5.39907	6.22149e-05	0.00427141		CCGCGCCTGTC	-7.91354	4.3118	4.11837e-06	0.000272543		GTTTGGG	3.94515	4.15046	2.96034e-07	2.15787e-05		GAAGTAGAATTATTTGATTGGAGAAGGT	6.47213	3.65924	0.000198194	0.0117246		GCAGATATTGTACAATAATTCTATGTC	-8.54325
TGATTACGTCCCTGCCCTTTGT	-5.93988	4.93644	9.92295e-09	7.03791e-07		GTAACTGTCTGGGACATATCACTACT	-8.31481	4.13692	5.23808e-06	0.000323093		ACTCCGGAGAG	6.10173	4.53063	5.6624e-08	5.01506e-06		GAGAGGCAGGAAGAG	-5.92953	5.92029	3.32376e-05	0.00175937		TAAAGAGGACGTG	8.20162	5.24347	6.25934e-05	0.00428463		GACCTGATCGTTTTGGTACTTTAACCT	5.92461	4.18978	4.15992e-06	0.000272867		TGAGCTATGATGTAACTATAATGAGCCTGATCTATTTGATGTGAATTCCGCTTCTGAGCTCT	-8.67741	3.74993	2.9676e-07	2.15994e-05		GAGAAGTTTTTTATATAAGTCTGTGTG	6.47213	3.65924	0.000198157	0.0117246		GCGTGGGTTCAAATCCCATCTTCGTCATACTTTT	-8.54325
TGGGAGACCTCCTGGGAACCGTT	-7.78587	2.80263	9.94182e-09	7.03883e-07		GTTACTGTTTCTGTCGAGTTTATGG	-9.38875	5.12822	5.24918e-06	0.000323296		ATTCTTGGACCGTAGCGAGACG	8.49033	3.37672	5.66209e-08	5.01506e-06		ATGTCCGGGGCTGCACGCGCGC	-8.01023	5.23551	3.3245e-05	0.00175937		CGTGCGAGACCG	5.56212	5.90415	6.25592e-05	0.00428463		TGGATGGGAGACCTCCTGGGAACCGTTAGTGGCGT	-7.9297	4.32589	4.17125e-06	0.000272867		CCTTGGCATGGGAGAGGGCTGGGGTTCGATTCCCCATATCTCCACCA	-8.91739	3.96903	3.01924e-07	2.19261e-05		GTACATCGTGATCTGAATCTTTCACCT	6.47213	3.65924	0.000198105	0.0117246		GTTGTACTAGAACTAATACTCGTTGTT	-8.65054
CCCTCTCTCGTC	-7.0972	3.89117	9.956e-09	7.03883e-07		GTGAAGTTCTGTTCTGCTGTGGTCC	-9.51048	5.24865	5.28274e-06	0.0003244		GATTGTTCTTTGATTGATTGTTCTTT	-9.20356	4.51156	5.67609e-08	5.01972e-06		AAAACAGCGGGGAAA	-5.02108	7.08714	3.34139e-05	0.00176568		ATC	-5.21816	5.21051	6.35621e-05	0.00434448		TGACGGAAGGGCACCACC	-7.96939	4.35642	4.17214e-06	0.000272867		GCCCTTAGATGTCCGG	4.93859	1.80928	3.02144e-07	2.19261e-05		GTAGTTTGT	6.47213	3.65924	0.000198017	0.0117246		GGGCTTGATTGTCGTTTTGGTACAAA	-8.65054
GATACATGACTTCGTCTTTTGGAACT	9.80112	5.21112	9.96854e-09	7.03883e-07		GCAGATTGTTGATTCCTTGGTGCTTA	-8.50708	4.3114	5.28061e-06	0.0003244		CAGGGCGGTGGC	8.54643	3.426	5.69746e-08	5.03116e-06		ACAGCTCACTCAATTGCCATG	7.85922	4.97606	3.37068e-05	0.00177754		TTTGCGACTAATCCAGGCCACA	-3.83175	10.7043	6.38299e-05	0.00435632		GATACGTTCATTAAGGCAATCTTCGTCT	6.0203	4.27646	4.22587e-06	0.000275971		GACAATCTCAGGGCCAGAGCTAAGG	-5.17481	4.70153	3.03107e-07	2.19633e-05		TTTGGCACTGTATCGGCTCCA	6.46324	3.65381	0.000193445	0.0117246		GTTTGATATACAGTCTTGAAGTAGAAT	-8.65054
TCGGAAACGAAAGTCTTTCGGTTCCGGGGGAAG	-8.66555	3.58376	1.01068e-08	7.10557e-07		TCTCTGGTAGTATAGTGGTGAGTATCC	-5.81071	4.55878	5.3738e-06	0.000329503		GAAAAAATCGTTTTACTATCTTATGTT	-9.23736	4.54371	5.72392e-08	5.04704e-06		CTCCTGGGAACCGTTAGTGGC	-7.79749	5.05523	3.3788e-05	0.00177754		TTTTGTATTGCTGAATTTTTGCT	-4.34308	9.18662	6.44728e-05	0.00439369		TTTGCGACCTATATCCAGGCC	7.94271	4.17275	4.29681e-06	0.000280189		ACTGGCACGGACA	5.03723	3.47018	3.04235e-07	2.20125e-05		GAAAGAACTCTCTCCATATCATGATCA	6.46324	3.65381	0.000193428	0.0117246		TGATATGTCTGGTATTCTTGG	-5.84736
TACTTGGATGGGAGACCTCCTGGGAACCGTTAGT	-7.82295	2.83353	1.01078e-08	7.10557e-07		GGCGAATCTTGTATCTCTGAGATGCA	-8.33782	4.15715	5.40584e-06	0.000330003		TTTGGGACCTGTGTTTAAGTTGA	-7.23165	4.49677	5.78518e-08	5.09352e-06		CGCTAAGGATCGTGTA	-7.84102	5.0953	3.37876e-05	0.00177754		TTAGATAGATGTAGACTGTGTCTG	8.33311	5.35568	6.51781e-05	0.00443519		GAAGTTGATTTATCTTGGAATTGTATT	5.67081	4.70266	4.34339e-06	0.000282808		AGAGGGCTGGG	-6.78144	4.81446	3.05034e-07	2.20377e-05		TTGGAAGAAAAGAAAGATCA	6.46324	3.65381	0.000193402	0.0117246		TTTGCGACCTATCCAAGATCAA	-6.57921
AGAACTGGCACGGACAAGAGGAA	-7.82295	2.83353	1.01068e-08	7.10557e-07		GTTTCTGTTTCACTGGATATAGTAGCT	-8.31061	4.1321	5.39498e-06	0.000330003		GTAAGCATCAACAAACAATTTGACG	-9.33986	4.64478	5.80792e-08	5.09682e-06		TGGGAGACCTCCTGGGAAC	-7.85714	5.10918	3.44978e-05	0.00181067		TTATAAAATCGTGTC	-4.24985	5.96651	6.53461e-05	0.00444007		TTGACGGAAGGGCACCACC	-6.1063	5.12992	4.37288e-06	0.000284308		CGAATCCTGCCAGGATCGTTACCTTTT	4.53441	2.91288	3.07216e-07	2.21626e-05		GGTTGTAGTCCTTTAGCGTACTTTGAT	6.46324	3.65381	0.000193386	0.0117246		TGAGATCATGTTAAACTCATAT	-6.57921
TGGGAGACCTCCTGGGAACCGTTAGTGGCGT	-7.87428	2.87744	1.01659e-08	7.10588e-07		GTACATCTGTAAGAAATTGTTCATA	-8.309	4.13182	5.40062e-06	0.000330003		GAGAGGAACCG	6.24488	6.28076	5.81457e-08	5.09682e-06		CGGGTTCGATTCCCGATAAACGCACC	-7.86708	5.11807	3.45195e-05	0.00181067		TGCGAGCTATCTTAGTACTTG	5.54672	5.8905	6.56431e-05	0.00445368		ATATCGAGAGGCAGGAAGAGA	-6.08692	5.11368	4.38734e-06	0.000284828		TTTGCGACTGGATCCAGG	4.63036	3.05564	3.09543e-07	2.22884e-05		GTAAGTATCGTAGTGTTCTGAGAGAG	6.46324	3.65381	0.000193358	0.0117246		GAAAAATCAATCATGACTTGGACT	-8.4653
TCCGGAGAGAG	-7.87428	2.87744	1.01646e-08	7.10588e-07		GGTGAATTTAGGGACAGGTCTAAA	4.94904	2.02331	5.42387e-06	0.000330617		GTACTCCGGAGAG	8.44347	3.33574	5.8079e-08	5.09682e-06		GCTGCCCGGAAC	-4.89313	7.94206	3.47117e-05	0.00181807		AGACCGGGG	8.18239	5.2272	6.5784e-05	0.00445667		GAATATCATTCTGGATCTGTTTTAGTT	8.00635	4.23179	4.41222e-06	0.000286022		TTAATTTTTATAACACAATCA	6.87506	1.38118	3.11622e-07	2.22884e-05		CCCCGGG	6.46324	3.65381	0.000193343	0.0117246		GCTAAGTATTTAATTGTTGTTGTTGTT	-8.68451
CCCTGCTGGCGGC	-7.01475	3.81415	1.01679e-08	7.10588e-07		GATACGAGGATCGGTTTTAAGACA	-8.33393	4.15327	5.523e-06	0.000335181		CCGGAGAGGG	8.70407	3.56547	5.8665e-08	5.13478e-06		AATTCTTGGACCGTA	-7.94901	5.18279	3.4836e-05	0.00182191		GTTGATTCCGATAACGAGCG	5.82613	6.14057	6.64976e-05	0.00448918		ACCTCCTGGGAACCGTTA	-8.19304	4.54639	4.42198e-06	0.000286234		TTTGGGTAGA	6.87506	1.38118	3.11642e-07	2.22884e-05		GTACAGTACTGTAATTGAAATTGTGTA	6.46324	3.65381	0.0001933	0.0117246		GATAGTAAATGTTTTTGTAGGATCAGGT	-6.61885
GCACGCGCGC	-6.9803	4.53965	1.01467e-08	7.10588e-07		GATAAAATCGTCAGTCTTAGAAGGAG	-8.32636	4.14707	5.50737e-06	0.000335181		GGAGAAGTTGTTGGTTGTGGAATCAAA	-9.20372	4.51119	5.91575e-08	5.15518e-06		AATTCTTGGACCGTAGC	-5.59922	6.45279	3.48999e-05	0.00182257		TTTGCGACCAAACCAGATCAA	-4.04721	6.71712	6.66234e-05	0.00448918		AAAAGAAAGATCAGAGTTGTG	8.06741	4.28866	4.48061e-06	0.000289604		TGAAGTTGTAGAGAAGATGTT	6.87506	1.38118	3.11814e-07	2.22884e-05		GACCGTC	6.46324	3.65381	0.000193299	0.0117246		TGGGAACCGTT	5.58358
GATTACGTCCCTGCCCTTTGTAC	-7.21857	5.65056	1.02251e-08	7.13543e-07		GGGGATATAGCTCAGTGGTAGAGCATGTGACT	-5.61217	8.68357	5.51704e-06	0.000335181		GGGGAGATAGCTCAGTGGTAGAGCATGT	-7.81468	5.06208	5.9068e-08	5.15518e-06		GATTACGTCCCTGCCCTTTGTAC	-5.74818	7.50332	3.50184e-05	0.00182608		TCGATTCCCCGCCAGAGAGCCA	-5.39334	6.51613	6.64274e-05	0.00448918		TGCCACGCGGGAGTCCCGGGTTC	-8.0016	4.38294	4.5072e-06	0.000290896		TCTTTGGTTGTTTCGCTGTATG	6.87507	1.38118	3.12491e-07	2.22884e-05		GTTTGGATTTACTAGAAGTCTTTCGTT	4.67931	4.36712	0.000191899	0.0117246		ATAGGTTGGAGA	-6.8718
GCACGCGCG	-7.77296	2.79247	1.03538e-08	7.21467e-07		GGTTATCGGCGAATTTTAATTACT	-8.37375	4.19034	5.53165e-06	0.000335215		AAGTCTTTCGGTTCCGGGG	7.04071	4.09061	5.90942e-08	5.15518e-06		ACCGCCCGTCGCTGC	-5.88393	7.24586	3.5282e-05	0.00183446		TTGGAATGAAGCTAGAAATAGCTTCTAA	-6.05754	9.40101	6.66537e-05	0.00448918		AATGATTGTTGTGGTTAAAAAGCTCGTAGTTGGA	-8.19347	4.56194	4.53566e-06	0.000292305		TGGCAGTGTGATTTGCTGGTTG	6.87507	1.38118	3.12633e-07	2.22884e-05		TGCGAGACCGGGGTTCGATTCCCCGCCAG	-5.02834	3.96928	0.000191401	0.0117246		TTTGCACTTAGATCCCTGACTAC	-5.38318
TACGTCCCTGCCCTT	-8.30344	3.25313	1.04712e-08	7.25336e-07		GAGCTACTTGTAGATGACGTCCTA	-8.37932	4.19525	5.54971e-06	0.000335818		ATAGGTCTATTTGTTTTCTCATG	-7.99041	9.19808	5.95205e-08	5.16197e-06		ATTGACGGAAGGGCACCACCAGGAGTGGAGCCTGC	-7.80821	5.06711	3.52576e-05	0.00183446		TGGCAGTGTCGTTAGCTGGTTG	-5.0584	4.51545	6.69648e-05	0.00450355		TTACGTCCCTGCCC	-5.11966	5.93096	4.59672e-06	0.000294946		TTGATTACGTCC	6.87507	1.38118	3.12902e-07	2.22884e-05		ATTTTTGCGTGTGGGAGAGATGCGTTCGCGCACTCTCCCGA	-4.18658	3.95674	0.000200927	0.0118224		TGGCTTGGATCTATCTGCA	-5.54881
CCCGGCATCG	-7.90784	2.90736	1.04847e-08	7.25336e-07		GATAGAGGATCGCTTTTTTAGTAACT	-9.27434	5.02555	5.57305e-06	0.000336739		CGACTCCGGAGAGG	6.30652	4.20826	5.95773e-08	5.16197e-06		TGGCAGTGTAGTTAGCTGGCTG	8.07903	5.1777	3.54749e-05	0.00183692		GATGCCCTTAGATGTCCG	8.24692	5.28175	6.7976e-05	0.00454318		AAATTCTTGGACCGTAGC	-5.34786	5.25955	4.59437e-06	0.000294946		AAGAACTGGCACGGAC	6.87507	1.38118	3.13061e-07	2.22884e-05		ATGGTCCTGTGG	6.54641	3.71077	0.000203593	0.0119617		GGTTTGGAACTTGGATGAGGGAGTCT	-8.50321
CACCGCCCGTCGCC	-7.79016	2.80601	1.04643e-08	7.25336e-07		GTAACAATGGAGTCGTCAGAAGCTG	-8.27628	4.10175	5.60597e-06	0.000338235		GATCCCGTCCGATCTCCGAAGT	6.60946	3.69956	5.95301e-08	5.16197e-06		CCACCCGGGGG	-7.90081	5.14174	3.54518e-05	0.00183692		GCATCGGGCTCC	5.65713	5.98873	6.77884e-05	0.00454318		TTGGATGGGAGACCTCCTGGGAACCGTTAGTG	-8.17462	4.5304	4.58838e-06	0.000294946		TTAAGTAGTAGTGTCGCAGGTTG	7.28228	1.72216	3.10549e-07	2.22884e-05		GATTCTTGTAGAATTTCTCCGGTGCA	6.50255	3.68416	0.000205557	0.012014		GTCAAATGCAGGATGAGCTCGTAGACT	-8.61576
TGGATGGGAGACCTCCTGGGA	-7.79016	2.80601	1.04316e-08	7.25336e-07		AGGGAACTAGTATATTTAGTACAATGGTCTGTAAAACTGGAGGTTTGTTTCCCTGCCAAAA	-8.86916	4.64667	5.6389e-06	0.00033966		CTGCGAGTG	8.37066	3.27233	5.95818e-08	5.16197e-06		CGCCCGTCGCTGCCCGGAACTG	-7.90081	5.14174	3.5484e-05	0.00183692		GAACGTGAGCTG	4.78556	6.5747	6.77054e-05	0.00454318		GATTCCCCGCCA	-7.88656	4.28768	4.60885e-06	0.000295295		GGTTCCGGGG	4.64685	2.00528	3.16737e-07	2.25173e-05		GATGAAGACGTAGAAGATGTGTCAC	6.50255	3.68416	0.000205597	0.012014		TTTGCGACTGTATACACATCACT	-6.5786
CGGTTCCGGGGGAAGTATG	-6.09988	4.16579	1.04854e-08	7.25336e-07		TGCGTGTGGGAGAGATGCGTTCGCGCACTCTCCCGA	4.28992	3.32167	5.64597e-06	0.00033966		GGAATCATTTGGGACCTCGGGAACA	-9.23483	4.54115	6.02879e-08	5.20867e-06		TCCGGGGCTGCACGCGCGCT	-8.19972	5.39949	3.63341e-05	0.00187819		TCTTTGGTTGTTTAGCTGTATGAA	-4.25778	8.91538	6.79763e-05	0.00454318		TGGGTATGTTCTTCGTTCAAG	7.90978	4.14231	4.6212e-06	0.000295442		CGAGTCCTGTCAAGATCGTAAAAAGTTTT	5.16974	1.33945	3.21965e-07	2.28558e-05		GAAGTTATGTTTTCACGGTTGAGAAGG	6.50255	3.68416	0.000205638	0.012014		GTTCTTAACATTGTGGATTCTCTAAGT	-6.91289
AAAAACAGCGGGGAAA	-7.90382	2.90417	1.05581e-08	7.272e-07		GCTGACTTTCAATGTAACTGCTAGA	-8.36628	4.18354	5.70655e-06	0.00034034		GTAACTGAATATTCTGGATATGATACT	-9.18137	4.4896	6.02956e-08	5.20867e-06		TTTGCGACCCAATCCAGGCT	6.3865	5.52099	3.65443e-05	0.00188632		TTCATAATTTTTGGAGGCTCTCCTTCGGGTGAGCGAT	-7.99684	4.77555	6.8047e-05	0.00454318		GTTGTATTCTCTTGATTAGTAGCGGGT	7.90971	4.14226	4.62455e-06	0.000295442		TACCCGTAGTCCACTGCTGTCA	5.35421	5.84675	3.2585e-07	2.30981e-05		GTATCCAATAGCTTTCGTTGTTTTTAGA	6.50255	3.68416	0.000205679	0.012014		GATTATGTCGTCTTCGCTATCCTCATC	-8.42669
TGAATACCCGCTGAA	-7.79753	2.8135	1.05579e-08	7.272e-07		GAATTAATTTTATGATCTTCGTGCA	-8.36342	4.18035	5.69041e-06	0.00034034		GATCTTAATGAGTCATCTGAACAAG	-9.34588	4.65068	6.07591e-08	5.24111e-06		TTTGCGACTAAACCTAGATC	6.662	5.78269	3.6643e-05	0.00188868		GGAAGCTCG	8.62329	5.61304	6.85515e-05	0.00457023		TACGTCCCTGCCCTTTGTAC	-5.30512	7.03862	4.64201e-06	0.000296128		GCGGGGAA	4.85401	4.33492	3.2926e-07	2.3306e-05		TATGATTGCGTTATAAAAATTG	6.60963	3.75556	0.000209114	0.0121616		GAATAGGATCATTCTTGCTTAACTTAG	-8.42669
GAACTGGCACGGATA	-7.76103	2.78141	1.05425e-08	7.272e-07		GACTGAAGACTGGTTTCATATGAACATT	-8.25933	4.08666	5.67485e-06	0.00034034		GTTGAATCGATATATTTTGCTGTTGCT	-9.198	4.50591	6.09633e-08	5.25112e-06		CACCGCCCGTCGCTGCCC	-5.37665	7.13546	3.70757e-05	0.00190822		GGAGTCCCG	5.34626	7.50565	6.87846e-05	0.00457915		ACCGCCCGTCGCTGC	-5.37197	6.45761	4.65714e-06	0.000296664		GGCGGAATGGCCGAGCGGTCTAAG	-6.66701	6.16022	3.32313e-07	2.34061e-05		GTCCTTTTGAACTCTTTCGAAGACT	6.60963	3.75556	0.000209077	0.0121616		GACTGGAAACTTTTAGTTGAAATAGGA	-8.42669
CCTTAGATGTCCGGGGCTGCACGCGCGCT	-7.54041	4.30334	1.05805e-08	7.27687e-07		GGTGAATTTAGGGACAGGTCTTCTAAAC	3.92745	5.10001	5.68494e-06	0.00034034		GCACCTTCTCGGAAAC	8.44331	3.3356	6.10654e-08	5.25233e-06		GCTGCCCGGA	-4.70479	7.04305	3.72764e-05	0.00191578		TGACTGGAGCTG	4.83903	6.62348	6.91912e-05	0.00459957		GCCGGGAGTCGTGGTGGGCT	-7.98622	4.36937	4.66858e-06	0.000296964		CTCTGGTCGATGA	5.15682	1.34912	3.33546e-07	2.34061e-05		GGAGAAGTTGTTGGTTGTGGAATCAA	6.60963	3.75556	0.000209036	0.0121616		TGGCTTGGATCTATCTGCAA	-6.69975
GAAAGTCTTTCGGCTCCGGGGGA	-7.76973	2.78825	1.05989e-08	7.279e-07		GGTGAATTTAGGGACAGGTCTTCTAAACTTGTTTTAAAA	4.35775	2.569	5.69858e-06	0.00034034		AGAAGGTCGCTGGTTCGATTCCAGCATGAGGCACCA	-7.41529	5.9648	6.16162e-08	5.26901e-06		AAAGTCTTTCGGTTCCGGGGGAAG	-4.91395	6.71115	3.75121e-05	0.00192512		ACAATGTAGTGATCATTATGTTCCTG	8.72759	5.70051	6.96979e-05	0.00461992		GAGGTGAAATTCTTGGACCGTAGCGA	-5.47848	5.38127	4.73606e-06	0.000300822		TTTCGGTTCCGGGGGAA	5.15682	1.34912	3.33428e-07	2.34061e-05		TTTGCGACCTATATCCAGG	4.11664	4.6141	0.000211339	0.0122732		GGAACCGTTAGTG	8.8593
ACCTCCTGGGAACCGTTA	-8.52524	3.45022	1.06825e-08	7.28397e-07		CAGTAATTAGTTTAATAAAAATATAGCATTTGGA	5.25446	3.32149	5.70209e-06	0.00034034		GTTTAGAGGAATAGG	6.60143	3.70037	6.17013e-08	5.26901e-06		TGAACCGGGCAA	-5.91545	5.89603	3.75906e-05	0.00192637		GTTGCGAGCTATCTTAGTACTTG	4.87312	6.12352	6.96435e-05	0.00461992		GAAATTCTTGGACCGTAGCGAGACGTCCTACTGC	-8.09739	4.47733	4.76e-06	0.000301907		AACAGGTCTGTGATGC	5.15682	1.34912	3.3337e-07	2.34061e-05		GATTAGTACATATCGTTGAGTTTAAAT	6.48109	3.66466	0.000213044	0.0123188		TCTTACGCTCATATCC	-5.74282
TTGGATGGGAGACCTCCTGGGAACCGTTAGTG	-8.50768	3.4344	1.06724e-08	7.28397e-07		GTCTGTAAAATTTCTTGATTTAAAGTT	-8.32706	4.14677	5.72278e-06	0.000340818		CGGGGGAAGT	8.14051	3.07444	6.15338e-08	5.26901e-06		TACGTCCCTGCC	-7.79152	5.0528	3.76501e-05	0.00192665		TATATGTTGAGAATACTTTCTGAACTC	-5.04626	4.50619	6.99916e-05	0.00463272		TCTTTTTGATGAGACTTTTTGACTGAGGA	7.94259	4.17266	4.77638e-06	0.000301929		GGTTCGGTTTGA	5.15682	1.34912	3.33311e-07	2.34061e-05		GTCAAATATTCGACTAAGAAGGTCGGA	6.48109	3.66466	0.000212994	0.0123188		GTTAAGAATAGTA	-8.42637
AATTCTTGGACCGTAGCGAGAC	-8.42336	3.36326	1.06709e-08	7.28397e-07		GTTATCCTTGGATTGCGGTACTATT	-8.27542	4.10122	5.74087e-06	0.000341405		TGGACCGTAGCGAGACGTCCTACTGCG	8.41945	3.31479	6.15713e-08	5.26901e-06		ACTTGGATGGGAGACCTCCTGGGAACC	-5.32202	6.18727	3.79082e-05	0.00193456		CATAAAAAGTGTTGTT	5.72062	6.01849	7.03637e-05	0.0046328		ATGTCCGGGGCTGCACGCGCGCT	-5.11505	6.46172	4.76814e-06	0.000301929		AGGGGC	5.15682	1.34912	3.33224e-07	2.34061e-05		GAAAGATCAGAGTCGTGTTT	6.48109	3.66466	0.000212944	0.0123188		ATTGCACATAGACTATTCTGA	-8.60142
AAAGGAAAGGGCAAGTCTGGTGCCAGCAGCC	-7.74795	2.77113	1.06745e-08	7.28397e-07		CTTCGGATGCGTGGGTTCG	-9.59868	5.32858	5.78375e-06	0.000343462		CCCCCAGG	8.89035	3.73222	6.15105e-08	5.26901e-06		GATGCCCTTAGATGTCCGG	-8.66473	5.82692	3.79134e-05	0.00193456		GCGCACGAATG	5.5475	6.76209	7.032e-05	0.0046328		ATCGCTGTTGTTTGAACCGGGCAAAA	-5.18199	5.98604	4.7809e-06	0.000301929		GTTGATGATCGGTCGTAGG	-12.5251	7.46234	3.38992e-07	2.37542e-05		GTTTTCTCTAGAATGTCGGATCCTATT	4.82376	4.49071	0.000217621	0.0125654		TGAGATCAGATTAGACTTATCG	-8.46724
GTTAAATTTGTCTGGAGTGAAGAATT	9.74357	5.15499	1.0679e-08	7.28397e-07		GGAGAAGTTGTTGGTTGTGGAAT	-9.37337	5.11803	5.83769e-06	0.000345808		GAAAAGCTGCAGAGATTTTGAGTAAA	-9.44753	4.75005	6.22775e-08	5.27289e-06		TCCCTGAGATTTCATATAACCGGAA	7.82199	4.94195	3.81608e-05	0.0019444		TTGCGACCGAATCCAGGCCACG	-4.11124	6.56996	7.0395e-05	0.0046328		CGAGAGGCAGGAAGAG	-4.67057	6.25884	4.79111e-06	0.000302141		GCCCGTCGCTGCCC	4.89122	2.5355	3.43082e-07	2.40064e-05		ATTTTGTAATTTTTGGAGGCTCCCCTTCGGGGGAGCGAT	-3.0239	6.13393	0.000219115	0.0126335		GCATAGCCGATTCCGATACAGAACCAG	-8.46724
ATACCCGCTGAACTT	-6.96274	3.75976	1.07224e-08	7.30073e-07		GCATAAAACTTTGAAGCAGTAACA	-8.32644	4.14783	5.83994e-06	0.000345808		GAAGATCAGTTGAATTAGAACTACT	-9.24642	4.55369	6.21962e-08	5.27289e-06		ATCGCTGTTGTTTGAACCGGGCAAAA	-4.99594	6.78628	3.8444e-05	0.00195603		CAAGCGGCCGATTCGGGTTCGATTCCCGATAAACGCACCA	-5.09655	4.51131	7.0366e-05	0.0046328		TGCCCGGAACTGAGCA	-5.10188	6.44992	4.80486e-06	0.000302576		AGAGGCCCCG	-6.00255	5.45229	3.45728e-07	2.4157e-05		GATACTTGTTAATAGGTTACTGTTGGAT	4.11	4.66009	0.000219937	0.0126628		AAAGTCTTTCGGTTCCGGGGGAAGTATG	5.62657
GATGTCCGGGGCTGCAC	-6.47836	4.06857	1.07899e-08	7.33623e-07		GGATAAAAAAATATTGAATGTTTAGG	-8.33313	4.15348	5.87318e-06	0.00034728		GTATAGTTATAGACTGTTGAGAATA	-9.22456	4.53186	6.21823e-08	5.27289e-06		TAGGGTTCGACTCCGGAGAGGG	-5.20068	6.59519	3.8647e-05	0.00196355		GGAAAACTCACCCGG	8.24944	5.28383	7.06496e-05	0.00464292		GAGATTGTTTGAGCTATTGAACTCGCA	5.98949	4.24803	4.83798e-06	0.000303794		TACCCGTAGTCCATTGCTGTCA	5.17776	5.56867	3.55908e-07	2.48328e-05		GGTGAATCTAGG	-6.49891	3.44627	0.000222266	0.0127786		TTTGCGACTGTATCCAAAACCCGC	-5.85175
TCCGCGCCTGTC	-7.9421	2.9362	1.08587e-08	7.37245e-07		GATATTGTAGCCAACTGAAATAAGGC	-5.70302	4.4616	5.9177e-06	0.000348932		GAAGATCTCGTAATCTATTTTGTCT	-9.1999	4.50825	6.21766e-08	5.27289e-06		AAATTCTTGGACCGTAGCG	-5.91836	5.90947	3.87681e-05	0.0019641		GTTTTCACCCACGCGGCC	8.55881	5.55168	7.15014e-05	0.00466226		AATTCTTGGACCGTAGCGAGACG	-7.91	4.3056	4.83421e-06	0.000303794		AGCTAGCTGGACC	4.31627	2.29549	3.56705e-07	2.4853e-05		GAGAGATGTTTAAGGGCTGTCTTT	6.57668	3.74255	0.000229705	0.0131713		TGACTAGAACATTACTTTGAC	-7.41218
TCAAGAACTGGCACGGAC	-7.92626	2.92363	1.09324e-08	7.41192e-07		AGGGAACTAGTATATTTAGTACAATGGTCTGTAAAACTGGAGGTTTGTTTCCCT	-5.55819	5.1852	5.92637e-06	0.000348932		GAGCTATTGAACTCGCATTCTTGAGG	-9.16401	4.47292	6.20793e-08	5.27289e-06		ACCTCCTGGGAACCG	-7.85711	5.10445	3.87213e-05	0.0019641		CCGGAACTGAGCAATATCG	8.18392	5.22808	7.14596e-05	0.00466226		ATTGACGGAAGGGCACCACCAGGAGTGGAGCCTGCGGCTTA	-7.9747	4.36874	4.8584e-06	0.000304642		CCGGAGA	4.77417	2.11265	3.5861e-07	2.49502e-05		AAGGAAGATGTTAATATACATC	6.57668	3.74255	0.000229753	0.0131713		TGAGATCATATTAGACCCATCC	-4.4366
ACTGAATGCACCGGATCCC	-7.92626	2.92363	1.10046e-08	7.4503e-07		GGTGAATTTAGGGACAGGTCTTCTA	4.64476	6.5102	5.92065e-06	0.000348932		GAAATTCTTGGACCGT	8.49036	3.37675	6.21671e-08	5.27289e-06		AGATACCGCCCTAGTTCTAACC	-7.74224	5.00971	3.89697e-05	0.00196593		GTATGTGTATCTG	5.55747	5.90152	7.15511e-05	0.00466226		ACACACCGCCCGTCGCTGCCC	-6.71906	5.68675	4.89271e-06	0.000306358		CGTAAGTCTT	4.34917	2.04995	3.69165e-07	2.5648e-05		GATAGCAAGTCCATTGTAGATATTGTC	4.66191	4.35571	0.000231382	0.0132458		TTCGGTTGACTCAAAATATCCTTGCTGATTTTGT	-5.38354
TAAGGCACAATATCGGCATCTCT	-8.3497	3.29373	1.11219e-08	7.46864e-07		CAGTAATTGTTTAATAAAAATATAGCATTTGGA	4.28068	3.45849	5.95621e-06	0.000350192		AAGTTTTGGGT	8.64322	3.51145	6.24247e-08	5.27785e-06		GTGATGCCCTTAGATGTCCG	-7.74224	5.00971	3.89415e-05	0.00196593		GGAACGGGCTTG	4.70099	7.65869	7.12089e-05	0.00466226		GTCTTACGCTCATATCCT	-5.11706	5.93028	4.93597e-06	0.000308627		GACATCGGTGTTGTTCTTGTAGAAT	-5.07396	6.05291	3.70174e-07	2.56817e-05		GGTGAATTTAGGGTCAGGTCTTCTAAACTTGTTTTGAGCTAGTAACTCA	-6.7762	3.65021	0.000236841	0.013539		ATTTGCTTATGTTTCCACGATCAA	-5.81036
CCGCGCCTGTC	-8.28424	3.23744	1.11275e-08	7.46864e-07		AACAGCGGGGA	4.94376	2.01983	5.97912e-06	0.000351041		GTGGATGACTTTACTATCGTAGACA	-9.18489	4.49364	6.26005e-08	5.28522e-06		CGAGAGGCCCCGG	-7.74224	5.00971	3.89359e-05	0.00196593		TACCCGTAGTCCAATGCTGTCAA	-3.96286	7.71663	7.10726e-05	0.00466226		GGGTTCGACTCCGGAGA	-5.49038	5.38551	4.94989e-06	0.000308943		CAGCGGGG	4.95473	1.79582	3.75241e-07	2.59963e-05		GATCTGGTTGGAAAATTAGAAGTTGGT	6.49022	3.67007	0.000239645	0.0136218		TCCCTGAGATTTCATATAACCGGAA	-4.70682
CGAGAGGCAGGAAGAGATACAAA	-7.91586	2.91372	1.11414e-08	7.46864e-07		GCAAGATCCAGAAAGTTCGGGTGCA	-8.4105	4.22386	5.99185e-06	0.00035129		GCTGAGTATTCTGATCTCGTTATCGAG	-7.33733	4.59833	6.34293e-08	5.34762e-06		CACGTCGGGTTCA	-7.76993	5.03125	3.91978e-05	0.00197198		TTCATTGTCCAGCGTTGAAACG	-6.38977	5.05208	7.13321e-05	0.00466226		TGAATACCCGCTGA	-7.91705	4.31793	4.95503e-06	0.000308943		CAGGTCTGTGAT	5.20249	2.49829	3.94049e-07	2.72607e-05		TTGAAGTTGTAGAGAAGATGTT	6.49022	3.67007	0.000239601	0.0136218		GGTGAAATTCTTGGACCGTAGCGAGACGTCCTACT	4.45184
CCGGATCCCGTCCG	-7.91586	2.91372	1.11296e-08	7.46864e-07		CGAATCTCGTCCCAAACGTACGTTTT	4.57827	2.77837	6.02077e-06	0.000352487		GACATATTCAAAAACATAGGAGCA	-9.30463	4.60996	6.44672e-08	5.42744e-06		TCTTTCGGTTCCGGG	-7.76993	5.03125	3.92004e-05	0.00197198		GCCTGCCACGCGG	4.92647	8.94793	7.21432e-05	0.0046942		ATTGGAAGAAAAGAAAGATCA	7.9099	4.1424	5.02719e-06	0.000310954		TGATTGCGTTATAAAAATTGA	8.58632	2.94524	4.01782e-07	2.77564e-05		GCACTGAGAGAACTTAAAGTTATTGTT	6.49022	3.67007	0.000239557	0.0136218		TCGATTCCTGCAATAGGCACCA	-4.98501
AGGTCTGTGATGCCCTTAGATGTCCGGGGCTGCACGCGCGCT	-7.72691	2.75293	1.11108e-08	7.46864e-07		GTATAATAAAGTAGATTCTTGGAGA	-9.5393	5.27615	6.16265e-06	0.000358766		CAGCAGCCGCG	8.56882	3.4457	6.46727e-08	5.43707e-06		GCCCGTCGCTGCCCG	-4.6441	7.19347	3.92876e-05	0.00197358		TTTTGTAATTTTTGGAGGCTCTCCTTCGGGGGAGCGAT	-4.72081	5.73658	7.24647e-05	0.00470847		CGAATCTCGTCCCAAACGGATTGTTTT	7.90959	4.14217	5.02604e-06	0.000310954		GAGAGGGCTGG	-5.41237	5.832	4.04317e-07	2.77746e-05		TTTTATTTCAATAATATTTGTT	6.49022	3.67007	0.000239513	0.0136218		GTCATTTGATTTATCGTAAATAATACC	-8.46498
GCGATCAGATACCGCCCTAGTTCT	-7.72691	2.75293	1.11127e-08	7.46864e-07		GTGGAATTATTTTCCCTGAGGATTGGA	-8.24215	4.0714	6.15592e-06	0.000358766		GAAGATTTGTGGAGGTTCGCGAAT	-9.26918	4.57583	6.4956e-08	5.44552e-06		TTTCGGTTCCGGGGGAAG	-5.53531	6.91823	3.95191e-05	0.00198241		CGACGTGGGATG	5.48139	5.80782	7.26363e-05	0.00471297		GAACATGTCAACTAAATATGAACTA	7.90959	4.14217	5.0296e-06	0.000310954		TTCACAGTAGATTATTGGTAA	7.15295	1.61105	4.04304e-07	2.77746e-05		AGTGTAGTTAGCTGGTTG	-6.50898	3.4518	0.000240771	0.0136509		TATTGGTTAATGATAAATTGA	-8.46498
GAGACCTCCTGGGAACCGTTAGT	-7.01878	3.81038	1.10702e-08	7.46864e-07		TGAGCTATGATGTAACTATAATGAGCCTGATCTATTTGATGTGAATTCCGCTTCTGAGCTCT	-5.74878	4.50227	6.15809e-06	0.000358766		GTTACATGTAGACCAAACTTTTTTCC	-9.2308	4.53744	6.48923e-08	5.44552e-06		GGTTCCGGGGGAAG	-5.11974	6.00638	3.95803e-05	0.00198269		TGAGAATCTTGTGGAC	5.80038	6.11739	7.28329e-05	0.00471908		TTTGCGACTGTATCCACATCCCT	5.60248	4.75146	5.01692e-06	0.000310954		TCCGGGG	7.15295	1.61105	4.03873e-07	2.77746e-05		GGTGAATTTAGGGACAGGTCTTCTAAACTA	-6.50898	3.4518	0.000240837	0.0136509		GATAAATATTTGTTGGATTCTGTGTC	-8.386
AGTCGGAACCC	-8.40757	3.34901	1.11663e-08	7.47482e-07		TGGCAGTGTAGTTAGTTGGTTG	4.95518	2.60911	6.13683e-06	0.000358766		TTCGGTTCCGG	8.15513	3.08689	6.54002e-08	5.46758e-06		TGGCAGTGTGGTTAGCTGGCTG	8.11347	5.20948	3.9694e-05	0.00198284		CGAT	-5.12228	5.04496	7.33089e-05	0.00474325		AGGGTTCGACTCCGGA	-8.05889	4.43057	5.02285e-06	0.000310954		CTATTCTGAAATTGTTTTTAATC	7.15296	1.61105	4.03584e-07	2.77746e-05		GATTGATTGTTCTTTGATTGATTGTTCT	6.61146	3.77068	0.000242725	0.0137386		GTGAAGAATCTTACTTGTTCTATTGTC	-8.38634
ATCGCTGTTGTTTGAACCGGGCAAAAA	-7.86874	2.87475	1.12722e-08	7.53517e-07		GTCTAGAGATATTGTAGAAATTGACA	-8.26208	4.08837	6.18185e-06	0.000358876		GCGAGTGAATTG	8.15513	3.08689	6.54025e-08	5.46758e-06		AACAGCGGGGAAAG	-5.17771	6.05772	3.97123e-05	0.00198284		GTCGCTGCCCGG	4.34481	7.48915	7.39498e-05	0.00477132		AATTAGGGTTCGACTCCGGAGA	-8.05889	4.43057	5.02584e-06	0.000310954		GGGGATATAGCTCAGTGGTAGAGCATGT	-4.6221	10.5864	4.17191e-07	2.86188e-05		GGGGAGT	6.41347	3.61712	0.000248447	0.0137525		GTGAACTGTATGGCGATGTTTAACA	-8.38634
GTTCCGGGGGAAGTA	-6.95989	3.7633	1.1308e-08	7.5485e-07		AGAACTGGCACGGACAA	4.56889	2.3126	6.1765e-06	0.000358876		GTACTTCATGGACTTCTAAATTGTATT	-9.32089	4.62563	6.56154e-08	5.47003e-06		TGGAAGTCGGAACC	-5.98492	5.96898	3.97503e-05	0.00198284		TAAATATGAATGTGAATGTTATA	-4.34166	6.03595	7.38758e-05	0.00477132		GACTGAACTTTAGACAATTTATAAACA	8.00629	4.23175	5.04234e-06	0.000311024		AGAACTGGCACGGAC	6.77911	1.30698	4.30169e-07	2.93211e-05		TCATTTTATGATTGCGTTAT	6.41347	3.61712	0.000248381	0.0137525		GATATTACTTTTGGTATTTAATTTGTC	-8.4257
TTGGACCGTAGCGAGACGTCCT	-8.28622	3.23768	1.13621e-08	7.56059e-07		GTAATATTCGGAAAGCGTTTTTT	-4.62017	5.74698	6.21561e-06	0.000360331		AGACCTCCTGGGAAC	8.67337	3.53821	6.56024e-08	5.47003e-06		CGCCCGTCGCTGCCC	-4.82786	7.88009	4.02439e-05	0.00200465		GTAAACGGCGGG	4.54584	7.04686	7.46012e-05	0.0047999		AGGTGAAATTCTTGGACCGTAGCGAGACGTCCTACT	-8.92393	5.22046	5.04486e-06	0.000311024		TGCACCGGATCC	6.77911	1.30698	4.30211e-07	2.93211e-05		GCTAATTGGTATCTTCTTAATTTCGTC	6.41347	3.61712	0.000248316	0.0137525		TAATACTGCCTTAGACGGCTA	-5.72275
AGTCTTTCGGTTCCGGGGGAAGTATGGTTGC	-7.93815	2.93307	1.13737e-08	7.56059e-07		TGAAGATTGTGGGTTCGAGTCCCATCGGAATCGCCA	-6.19104	4.90848	6.23863e-06	0.000361161		GAAATCCATGTATCGTTTTCAGGAATG	-9.14642	4.45603	6.6456e-08	5.52466e-06		ACCGTAGCGAGACGTCC	-5.21205	6.60559	4.05137e-05	0.00200687		AGGGAACGGGCT	3.7977	8.608	7.45743e-05	0.0047999		GTTAAATATTATACTCAAATCTATTGG	5.92501	4.18964	5.07199e-06	0.000311971		ATTGGCTTCATGATGATTCAA	6.77911	1.30698	4.3028e-07	2.93211e-05		GTTATCGGATTTGTTTTGAATCTATCT	6.41347	3.61712	0.00024825	0.0137525		GTGAAATTCTTGGACCGTAGCGAGACGTCCTAC	9.02962
GATTCTTTGGATCCTTGGTTGGACA	10.0223	5.426	1.1359e-08	7.56059e-07		GGCACTAAATATAACATCGTACAAT	-8.30025	4.12416	6.25725e-06	0.00036123		CTCCGGAGAGAGA	8.1839	3.11145	6.63708e-08	5.52466e-06		GATGTCCGGGGCTGCAC	-5.93499	5.92406	4.04216e-05	0.00200687		TACCCGTAGTCCACTGCTGTC	-4.3815	8.71489	7.51781e-05	0.00483027		TTAAAGCTTAGATCAAACGTC	5.33751	4.96978	5.0935e-06	0.000311971		TCACCATTTGGATATATCCATA	6.77911	1.30698	4.30346e-07	2.93211e-05		GTATTTTCTCAACAATCGTCTAGA	6.41347	3.61712	0.000248185	0.0137525		TAGCTGGACCAGGG	8.81756
TCCCGTCCGATCTCC	-7.73133	2.7564	1.1401e-08	7.56814e-07		CAAGAACTGGCACGGACA	5.19	5.3909	6.25527e-06	0.00036123		TTTCGATGATGTTATCTGCTTAGCAATTCCGAATATATTTGAGGAAAATGCCGCTTACTGAGTT	-11.949	7.22149	6.67334e-08	5.52788e-06		CTGGGGCGGTACA	-6.09956	6.07253	4.04666e-05	0.00200687		TGGCGACGTGGG	5.17187	6.4152	7.57005e-05	0.00485706		AAATTCTTGGACCGTAGCG	-6.08959	5.11435	5.08239e-06	0.000311971		CGGTCGTCT	6.77911	1.30698	4.31023e-07	2.93211e-05		GTTCTTCTATTTTAGTGATTTTACGGA	6.40436	3.61159	0.000247127	0.0137525		GAGGTGAAATTCTTGGACCGTAGCG	5.68162
ATTGACGGAAGGGC	-7.95618	2.94905	1.15164e-08	7.59556e-07		GAACTGGCACGGACAAGAG	4.4751	2.26871	6.33414e-06	0.00036516		AATAACAGGTCTGTGAT	6.58208	3.67524	6.6773e-08	5.52788e-06		CACCCGGGC	-7.81232	5.0713	4.05119e-05	0.00200687		TGCCCGGAACTGAGC	5.17794	6.37418	7.6004e-05	0.00486975		TCCGATGTAGTCTAGTGGTTAT	-7.99182	4.37367	5.10062e-06	0.000311971		TGCACCGGATCCC	6.77911	1.30698	4.31065e-07	2.93211e-05		GTTTTCGAACTGTTCTAAAATCTCACT	6.40436	3.61159	0.000247155	0.0137525		TCCCTGAGACTCTACTTGTGAA	-5.27933
TAGGGTTCGACTCCGGAGAGGGAGCCT	-7.81744	2.83089	1.15345e-08	7.59556e-07		GAAAATATACCTGCTCCAGTCGTACT	-8.31959	4.14137	6.37083e-06	0.000366765		GGCACGGACAAGAG	6.77265	5.54169	6.67491e-08	5.52788e-06		GGGGCTGCACGCGCGC	-7.72925	4.99926	4.06363e-05	0.00201014		CTTAGATGTCCGGGGCT	8.17762	5.22247	7.70019e-05	0.00489962		GATGTCCGGGGCTGCACGCGC	-7.99182	4.37367	5.1042e-06	0.000311971		TCCGGAGAGGGAGCCT	6.77911	1.30698	4.31624e-07	2.93211e-05		GTAAGGAACATAACTCTGTACATTTGTA	6.40436	3.61159	0.000247182	0.0137525		GAAATTGTCGTTGGCCTCTTCATTCTC	-8.50606
TCCCGGCATCG	-7.81744	2.83089	1.1557e-08	7.59556e-07		GTTGATAGCTCTGGATTTTGTGCATA	-8.4825	4.28678	6.41847e-06	0.000368099		GGAAGATTAGGATTTGTAGATTCAACC	-9.28897	4.59336	6.75108e-08	5.5812e-06		GGAGAGGGCTGG	-5.05898	6.45776	4.07643e-05	0.00201368		TTTGCGACCGGATCCAGGCCACG	-4.81071	5.1081	7.66692e-05	0.00489962		ATTGACGGAAGGGCACCACCAGGA	-7.99182	4.37367	5.10667e-06	0.000311971		GATCTAGCGTACCTCGCCTAGGAAACGG	4.85565	1.71286	4.3365e-07	2.94178e-05		GTTAGTCGGGTTGGATTTTGCGTT	6.40436	3.61159	0.00024721	0.0137525		GATATGATCACTGAGTTCTCTGATTGC	-8.50606
GGGTTCGAATCCCTCTCTCGTCA	-7.71448	2.74149	1.15336e-08	7.59556e-07		ATTAAACAGTTAAATTGCTCTGGAAATG	-8.2704	4.0966	6.42064e-06	0.000368099		GAAAGTCTTTCGGTTCC	5.89417	4.7121	6.7831e-08	5.59732e-06		ATTACGTCCCTGCCCTTTGT	-6.42732	6.37324	4.0981e-05	0.00202158		TACCCGTAGACCAATGCTGTCA	-5.00356	5.2557	7.69095e-05	0.00489962		GAAGGCGATCAGATACCGCCCTAGTTCT	-7.99183	4.37367	5.10976e-06	0.000311971		TTTGCGACTAAACCTAGA	4.23269	2.22424	4.41107e-07	2.98822e-05		GCTCATTTATCATAGATTCGTCTAGTG	6.40436	3.61159	0.000247275	0.0137525		GACGATATTGTAGAAATACCAACCTAC	-8.54356
ACTCACCCGGGCCGGACACTAT	-7.71448	2.74149	1.15301e-08	7.59556e-07		GTTTAAGAGCAAATTCACGTTGGCA	-8.25727	4.08463	6.40737e-06	0.000368099		ACAGCGGGGAA	6.83527	4.65363	6.78936e-08	5.59732e-06		TGTCCGGGGCTGCACG	-8.07122	5.28731	4.11534e-05	0.00202727		TTTGCAACTTCATCCATTGCACA	-7.72264	4.51949	7.69746e-05	0.00489962		CCCGTCCGATCTCCGA	-7.88769	4.28675	5.16699e-06	0.000315029		CGAATCCCACTCTCGTCAACAATTCTTT	4.31679	3.06676	4.43356e-07	2.99931e-05		GATTTTTTCGTTTTCTGTATTGACTTCT	6.40436	3.61159	0.00024734	0.0137525		AGATCAGAGTCGTGTTTATGGG	-8.54356
ACGGCTACCACA	-7.70103	2.73096	1.15687e-08	7.59556e-07		GAGGACAATATTTTTTTGTGTGAGCA	-8.34547	4.1641	6.50212e-06	0.000372255		GATAATTTGTGTCTGGATTGAGTTT	-9.13517	4.44498	6.83064e-08	5.62358e-06		ACGGGGGCATTCGTATCGCTACGTTAGA	-6.00584	5.98768	4.12222e-05	0.00202786		GCGGGTTTAAGTTAA	-7.83209	4.6259	7.6872e-05	0.00489962		TCCCTGAGACTCTCCTTGTG	7.97473	4.20245	5.20611e-06	0.000316655		TCCGGGGGAAGT	4.39334	1.77947	4.45313e-07	3.00838e-05		GATACCCAAATCATTCATTACTTTCGG	6.40436	3.61159	0.000247406	0.0137525		GATTTCTTTGCATTTATCGTTTATTGGT	-8.71799
CACTTCCGTCACC	-7.70103	2.73096	1.15698e-08	7.59556e-07		TTTGCGACTAATCTAGGCCAC	3.85256	2.50116	6.55654e-06	0.000374853		GAGCAATATCGAGAGGCAG	6.26898	4.17403	6.84859e-08	5.63058e-06		TGTGTCTGATTTCTGCCC	-4.97562	7.04457	4.14007e-05	0.00203383		TACCCGTAATCCACTGCTGCAA	-4.69123	4.99513	7.76149e-05	0.00492852		TCGAATCCTGCCAGGATCGTTACCTTT	5.85778	4.12887	5.20802e-06	0.000316655		GGGGATATAGCTCCGTGGTAGAGCATGTGACTGC	4.82496	1.69031	4.46768e-07	3.01405e-05		GATTGTTATCGGTAAAGGTCCTCTGAT	6.40436	3.61159	0.000247471	0.0137525		TGAAAGGCATGGGTAGTGAGACG	-5.80669
GATACCGCCCTAGTTCTAACC	-6.95547	3.7528	1.15069e-08	7.59556e-07		GGAAGAATATAGGTTAATGTTGAGT	-8.25216	4.07993	6.56663e-06	0.000374913		GACCGTTTTTTTGAGATCTTTGTCCT	-7.22612	4.49195	6.88824e-08	5.65538e-06		CCGGATCCCGTCCGATCTCC	-7.78902	5.04666	4.15166e-05	0.00203671		CGGCAGTGTGGTTAGCTGGTTG	-5.03012	5.37909	7.76701e-05	0.00492852		TGAAAGACATGGGTAGT	6.30984	4.60757	5.22112e-06	0.000317014		TCACCGAATCCACGATGTCT	4.10241	3.22044	4.5155e-07	3.04212e-05		ACAGCTCACTCAACTGCCATGC	-2.97351	6.86264	0.00024764	0.0137525		ATCATTTTATGATTGCGTTA	-8.38567
GTAGCGAGACGTCC	-10.1472	4.97539	1.16115e-08	7.60535e-07		ATCCAATAGCTTTCGTTGTTTTT	-8.41136	4.22509	6.58141e-06	0.00037524		GGTGACATTTTCTGATTGTGAACG	-9.21038	4.51755	6.90752e-08	5.66341e-06		TTGGATGGGAGACCTCCTGGGAACCGT	-7.78902	5.04666	4.16093e-05	0.00203846		AAACGAAAGTCTTTCGGTTCCGGGG	8.39481	5.40867	7.79824e-05	0.00494153		ATAGGAAATGAATCAGGAGAGAA	6.33326	4.62985	5.2425e-06	0.000317874		GTTCACAAATTTGATGGCTTTCGTC	-8.51166	3.60021	4.57491e-07	3.0779e-05		TACCCGTA	-4.18198	3.97598	0.00024421	0.0137525		GATTATTACATCCTTTGAGACTCGGGT	-8.38567
CGTAGCGAGACGTCCTA	-8.37537	3.31614	1.16359e-08	7.60535e-07		GTTATGATTTAACTGTAGTTTGGTGTA	-8.27215	4.09765	6.62176e-06	0.000376549		GTAATATCAAAATTATTCCGTGGGAT	-9.18069	4.4895	6.94663e-08	5.68765e-06		GGAAGTCGGAACCC	-7.17845	7.06338	4.18586e-05	0.00204785		TTTTGTAATTTTTGGAGGCTCCCCTTCGGGGGAGCGAT	-4.30944	5.76354	7.82133e-05	0.00494936		ATATC	5.47505	4.57475	5.28455e-06	0.000319984		CAAGAACTGGCACG	4.26741	2.02919	4.60244e-07	3.09217e-05		ACTCGATTAGTTTATTTTTAAAATATGGCTCTGAA	-6.6059	3.52228	0.000247956	0.0137525		GAGGATATTGATAATGAAAAAACAGCT	-8.38567
AACCGCGGAAAGCT	-8.37537	3.31614	1.16251e-08	7.60535e-07		GAAAACATCTTTTAGAATTAGAACA	-8.26442	4.09136	6.62253e-06	0.000376549		GAAAGTCAGACTTATCATTAGTATA	-9.23942	4.54673	7.02035e-08	5.69749e-06		ATTTTTGGAAGGCCGAGAGGCCTGA	5.49856	8.50295	4.23558e-05	0.00206367		ATAAAATCGT	-6.31508	4.9236	7.83765e-05	0.00495288		CATAGACTATTCTGAAATTGT	8.06735	4.28862	5.29943e-06	0.000320445		CGCCCGTCG	5.48142	1.56577	4.63392e-07	3.10905e-05		GCGGGTTTAAGTTAAG	-6.6987	3.59011	0.000249556	0.0137793		GATAAATGACTATCGAAGATTCTAGC	-8.42769
ATCGAGAGGCAGGAAGA	-7.89574	2.89779	1.16485e-08	7.60535e-07		GCGTTTATGGTGTAATGGTCAGCATGG	-8.13344	6.80149	6.63864e-06	0.000376947		ATTAAACAGTTAAATTGCTCTGGAAAT	-9.22785	4.53569	7.02396e-08	5.69749e-06		GAAATTCTTGGACCGTAGC	-5.40804	6.25673	4.23474e-05	0.00206367		AAAGTTAGAGGTTCGAAG	5.3075	6.53888	7.85944e-05	0.00495984		GGTTTCACGTCAAC	-5.19413	6.53746	5.31229e-06	0.000320783		ATATC	4.1932	3.19415	4.78157e-07	3.20372e-05		AGATGTAGACTGTGTCTGATTTCTGCCCAGTGC	-6.6987	3.59011	0.000249617	0.0137793		GCCTCATTAGTTCAGTTGGATAGAATGTATGACTTCT	-5.26899
CGGAAGGGCACCACCAGGAGTGGAGCCTGC	-7.97396	2.96484	1.16835e-08	7.60736e-07		GTAACTGTAGTTGGTTTTTTGGTGGT	-8.21397	4.04534	6.6681e-06	0.000377735		GATTGTTGTTTGATTGATTGTTTGATT	-9.19828	4.5069	7.0172e-08	5.69749e-06		GACGTGAAACC	-7.7227	4.994	4.22579e-05	0.00206367		CTTCGGATGCGAG	8.12357	5.17678	7.87064e-05	0.00496012		TCGGAAACGAAAGTCTTTCGGTTCCGGGGGA	-7.90079	4.30381	5.31978e-06	0.000320795		CAAGCGGCCGATTCGGGTTCGATTCCCGATA	-5.41008	5.2934	4.83469e-07	3.23488e-05		TTTCACAGTAGATTATTGGTAA	7.81248	4.707	0.000252926	0.0139238		GAAAAGGGTTTCACG	8.82897
ACAACTCACCTGCCG	-7.70551	2.73448	1.1676e-08	7.60736e-07		CGTTTGATCGAGCTTTAAATA	-5.47427	5.1222	6.67074e-06	0.000377735		TTTGAGACTAACGTTAGGGCTAAA	-9.1405	4.45042	7.01486e-08	5.69749e-06		TTTCGATGATGTTATCTGCTTAGCAATTCCGAATATATTTGAGGAAAATGCCGCTTACTGAGTT	5.47627	5.47	4.2518e-05	0.00206874		GTTCCGGGGGAAGTATG	4.47187	6.65779	7.9168e-05	0.00497559		ACCGCCCTAGTT	-5.72481	5.60578	5.39792e-06	0.000325062		TCTTTTTGATGAGACTTTTTGACTGAGG	6.8841	1.38724	4.86929e-07	3.25031e-05		GTATCCAATAGCTTTCGTTGTTTTTA	7.81248	4.707	0.000252833	0.0139238		AAAGATCAGAGTTGTGTTTAT	-8.38668
GGACCGTAGCGAGACGT	-7.98554	2.97406	1.17402e-08	7.63384e-07		GATTAGAAGTTATGATACTGTAAAGCT	-8.3519	4.16881	6.70427e-06	0.000378093		GTTCTCGGAGTATCAACTTTTGATA	-9.1276	4.43762	7.04388e-08	5.69749e-06		ACCTCCTGGGAACCGTT	-5.89553	5.8887	4.27081e-05	0.00207516		ATCGCTTCTCGAGTTTTTTAGCTCAGATCAAAGTG	-5.1731	5.09209	7.90852e-05	0.00497559		TGGACCGTAGCGAGACGTCCTACTGCGAAA	-7.92737	4.32754	5.41439e-06	0.000325609		TGAATGCACCGGAT	6.8841	1.38724	4.87104e-07	3.25031e-05		GAGGAAATTTTTCGGGTTCTGTTGTTG	6.48452	3.67347	0.000256117	0.0140015		TGAGATCAATGGGCATCTTCAAA	-8.38668
GCAACATCAACCACCTTCGTCATGT	9.72522	5.13728	1.17568e-08	7.63421e-07		GTAAGATGTTTTGTTATTGTCAGAGG	-8.31562	4.13742	6.70442e-06	0.000378093		GGCGGAATGGCCGAGTGGTCTAAGG	-7.20195	9.70619	7.02817e-08	5.69749e-06		CGACTCCGGAGAGGG	-5.87985	5.87473	4.28474e-05	0.00207909		TTTTGGAAGGCCGAGAGGCCTGA	-5.69471	7.94738	8.03486e-05	0.00504292		GAGAATTAGGGTTCGACTCCGGAG	-7.8936	4.29126	5.48648e-06	0.000329495		ATCATTTTATGATTGCGTTAT	8.45659	2.81948	4.90116e-07	3.26595e-05		GAAGCTTAATATCGTTATGACTGTATT	6.48452	3.67347	0.000256162	0.0140015		TAAATATGAATGTGAATGTTA	-5.39754
CTGAATGCACCGGATCCCGTCC	-6.98491	3.72769	1.17773e-08	7.63714e-07		GCAATAAATGTTCACACTGTAAGCG	-8.29239	4.11705	6.68844e-06	0.000378093		GAACGGGCTTGGCAA	5.42633	4.53715	7.00877e-08	5.69749e-06		CGGGCCGGACA	-5.45913	7.19248	4.30086e-05	0.00208407		CAGAAGGTCGGC	8.12587	5.17948	8.07042e-05	0.00505674		TTTGCGACCAAATCCAGGCC	5.4498	4.55136	5.54934e-06	0.000332316		ACCTCCTGGGAACC	5.31364	1.47268	4.96063e-07	3.29212e-05		AGAAAGATCAGAGTCGTGTTT	6.45433	3.64838	0.00025854	0.0140015		ATGTCTTACGCTCATATCC	-6.50914
[truncated: 95,735 more rows]
[truncated: 8 more columns]
