# Supplementary material for: Small non-coding RNAs have predicted roles in reproductive biology and transposable element regulation in the parasitic worm Strongyloides venezuelensis
Source: Research Square preprint supplement (doi:10.21203/rs.3.rs-5828314/v1), 2025-04-23
Supplement: Supplementary file 11 [file e2308c5ad31aeec5122f5182.xlsx]

## Sheet: Sheet1
SI Table X6 - 24-30nts derived from tRNAs from parasitic or free-living females a) Table showing the numbers and % of sRNAs targeting genes, 3’UTR, 5’UTR, TEs, tRNAs or rRNAs. Top rows indicate map frequency with majority of reads mapping once (1x) and some mapping more than once (>1x) and bottom row indicates proportion of reads. B) GO terms of genes targets by tRNA
tRNA 24-30 nt
		1x	>1x		1x	>1x		1x	>1x		1x	>1x		1x	>1x		1x	>1x
sRNA class	Reads	Gene			3'UTR			5'UTR			TE			tRNA			rRNA
free-living	192	12	58		22	5		2	0		9	122		0	0		0	0
parasitic	9	0	6		0	2		0	0		0	6		0	0		0	0
%		1x	>1x	Tot	1x	>1x	Tot	1x	>1x	Tot	1x	>1x	Tot	1x	>1x	Tot	1x	>1x	Tot
sRNA class	Reads	Gene			3'UTR			5'UTR			TE			tRNA			tRNA
free-living	192	6.25	30.2083	36.4583	11.4583	2.60417	14.0625	1.04167	0	1.04167	4.6875	63.5417	68.2292	0	0	0	0	0	0
parasitic	9	0	66.6667	66.6667	0	22.2222	22.2222	0	0	0	0	66.6667	66.6667	0	0	0	0	0	0
b) GO terms of 3'UTRs targeted by free-living tsRNAs
GO.ID	Term_BP	Annotated	Significant	Expected	Fis
GO:0071786	endoplasmic reticulum tubular network or...	2	1	0	0.0012
GO.ID	Term_CC	Annotated	Significant	Expected	Fis
GO:0000276	mitochondrial proton-transporting ATP sy...	11	1	0	0.0047
GO:0005753	mitochondrial proton-transporting ATP sy...	13	1	0.01	0.0055
GO:0019773	proteasome core complex, alpha-subunit c...	14	1	0.01	0.0059
GO:0045263	proton-transporting ATP synthase complex...	15	1	0.01	0.0063
GO.ID	Term_MF	Annotated	Significant	Expected	Fis
GO:0004521	endoribonuclease activity	128	2	0.08	0.0024
GO:0004540	ribonuclease activity	150	2	0.09	0.0033
GO:0004519	endonuclease activity	201	2	0.12	0.0058
GO:0004518	nuclease activity	251	2	0.15	0.0089
