# Supplementary material for: Small non-coding RNAs have predicted roles in reproductive biology and transposable element regulation in the parasitic worm Strongyloides venezuelensis
Source: Research Square preprint supplement (doi:10.21203/rs.3.rs-5828314/v1), 2025-04-23
Supplement: Supplementary file 12 [file e25c6a0763eba0e322ad3d9d.xlsx]

## Sheet: Sheet1
SI Table X8 - GO terms of 25 and 27Gs in parasitic and free-living females. Enriched GO terms (BP, MF, CC) associated with the predicted a) gene targets and b)3UTR targets of significantly (Fis <0.01) upregulated parasitic and free-living 27Gs. Table shows number of annotated, significant and expected genes. Protein descriptions for all genes targeted by upregulated parasiticand free-living 27Gs …
a) 27G GO terms targeting genes														c) 27G Protein Descriptions						d) 27G Tes
GO.ID	Adults-BP	Annotated	Significant	Expected	Fis		GO.ID	Adults-MF	Annotated	Significant	Expected	Fis		Query_Gene	Protein_Name Adults 27G_genes		Query_Gene	Protein_Name Adults 27G_3utr		TE targeted by parasitic 27Gs	Length	sRNAs
GO:0006259	DNA metabolic process	1149	395	74.58	< 1e-30		GO:0003964	RNA-directed DNA polymerase activity	261	143	16.97	< 1e-30		SVE_0032100	---NA---		SVE_0032100	---NA---		LINE/Dong-R4;Motif:rnd-1.32	130	3
GO:0015074	DNA integration	636	283	41.28	< 1e-30		GO:0034061	DNA polymerase activity	278	143	18.07	< 1e-30		SVE_0092700	Hypothetical protein SRAE_0000047000		SVE_0092700	Hypothetical protein SRAE_0000047000		LINE/Dong-R4;Motif:rnd-4.71	215	1
GO:0090304	nucleic acid metabolic process	2563	431	166.37	< 1e-30		GO:0140097	catalytic activity, acting on DNA	536	190	34.85	< 1e-30		SVE_0113900	JmjC domain-containing protein		SVE_0113900	JmjC domain-containing protein		LINE/Dong-R4;Motif:rnd-4.72	445	1
GO:0006278	RNA-dependent DNA biosynthetic process	261	143	16.94	< 1e-30		GO:0016779	nucleotidyltransferase activity	399	149	25.94	< 1e-30		SVE_0166600	DNA helicase Pif1 like family and P-loop containing nucleoside triphosphate hydrolase domain-containing protein		SVE_0166600	DNA helicase Pif1 like family and P-loop containing nucleoside triphosphate hydrolase domain-containing protein		LINE/Dong-R4;Motif:rnd-4.80	483	3
GO:0006139	nucleobase-containing compound metabolic...	2906	434	188.63	< 1e-30		GO:0003676	nucleic acid binding	3047	423	198.09	< 1e-30		SVE_0174700	---NA---		SVE_0174700	---NA---		LINE/Dong-R4;Motif:rnd-4.81	468	2
GO:0071897	DNA biosynthetic process	290	143	18.82	< 1e-30		GO:1901363	heterocyclic compound binding	5128	497	333.37	< 1e-30		SVE_0212200	Reverse transcriptase domain and Integrase,catalytic core domain and Zinc finger, CCHC-type domain and Ribonuclease H-like domain and Aspartic peptidase domain-containing protein		SVE_0212200	Reverse transcriptase domain and Integrase,catalytic core domain and Zinc finger, CCHC-type domain and Ribonuclease H-like domain and Aspartic peptidase domain-containing protein		LTR/Gypsy;Motif.146	1096	1
GO:0046483	heterocycle metabolic process	2973	434	192.98	< 1e-30		GO:0097159	organic cyclic compound binding	5130	497	333.5	< 1e-30		SVE_0234500	---NA---		SVE_0234500	---NA---		LTR/Gypsy;Motif.179	178	1
GO:0006725	cellular aromatic compound metabolic pro...	2974	434	193.05	< 1e-30		GO:0004190	aspartic-type endopeptidase activity	206	72	13.39	< 1e-30		SVE_0237400	---NA---		SVE_0237400	---NA---		LTR/Gypsy;Motif.180	248	1
GO:1901360	organic cyclic compound metabolic proces...	3012	434	195.51	< 1e-30		GO:0070001	aspartic-type peptidase activity	206	72	13.39	< 1e-30		SVE_0263800	---NA---		SVE_0263800	---NA---		LTR/Gypsy;Motif.184	7445	137
GO:0034641	cellular nitrogen compound metabolic pro...	3387	442	219.85	< 1e-30		GO:0008270	zinc ion binding	893	141	58.05	1.8e-24		SVE_0271900	---NA---		SVE_0271900	---NA---		LTR/Gypsy;Motif.198	137	1
GO:0043170	macromolecule metabolic process	5601	549	363.57	< 1e-30		GO:0016772	transferase activity, transferring phosp...	1395	179	90.69	1.4e-20		SVE_0278800	---NA---		SVE_0278800	---NA---		LTR/Gypsy;Motif.207	3295	6
GO:0006807	nitrogen compound metabolic process	5921	550	384.34	< 1e-30		GO:0004523	RNA-DNA hybrid ribonuclease activity	90	36	5.85	5e-20		SVE_0291900	---NA---		SVE_0291900	---NA---		LTR/Gypsy;Motif.208	2189	1
GO:0044260	cellular macromolecule metabolic process	4280	458	277.82	< 1e-30		GO:0016891	endoribonuclease activity, producing 5'-...	103	36	6.7	9.4e-18		SVE_0328800	---NA---		SVE_0328800	---NA---		LTR/Gypsy;Motif.227	4487	3
GO:0044238	primary metabolic process	6302	558	409.07	< 1e-30		GO:0046914	transition metal ion binding	1062	142	69.04	9.9e-18		SVE_0368100	Reverse transcriptase domain and Integrase,catalytic core domain and Ribonuclease H-like domain-containing protein		SVE_0368100	Reverse transcriptase domain and Integrase,catalytic core domain and Ribonuclease H-like domain-containing protein		LTR/Gypsy;Motif.241	5281	10
GO:0071704	organic substance metabolic process	6490	562	421.27	< 1e-30		GO:0016893	endonuclease activity, active with eithe...	109	37	7.09	1e-17		SVE_0368700	---NA---		SVE_0368700	---NA---		LTR/Gypsy;Motif.243	3158	6
GO:0008152	metabolic process	7171	584	465.48	< 1e-30		GO:0004175	endopeptidase activity	871	123	56.62	3.3e-17		SVE_0607800	DNA helicase Pif1 like family and P-loop containing nucleoside triphosphate hydrolase domain-containing protein		SVE_0607800	DNA helicase Pif1 like family and P-loop containing nucleoside triphosphate hydrolase domain-containing protein		LTR/Gypsy;Motif.268	5492	1
GO:0044237	cellular metabolic process	5637	486	365.9	3e-25		GO:0004386	helicase activity	329	66	21.39	7.1e-17		SVE_0613500	---NA---		SVE_0613500	---NA---		LTR/Gypsy;Motif.288	1770	6
GO:0000723	telomere maintenance	154	43	10	6.8e-17		GO:0003678	DNA helicase activity	191	48	12.42	1.4e-16		SVE_0614600	---NA---		SVE_0614600	---NA---		LTR/Gypsy;Motif.30	897	4
GO:0032200	telomere organization	155	43	10.06	8.9e-17		GO:0008094	DNA-dependent ATPase activity	205	48	13.33	2.8e-15		SVE_0615300	Integrase, catalytic core domain and Ribonuclease H-like domain-containing protein		SVE_0615300	Integrase, catalytic core domain and Ribonuclease H-like domain-containing protein		LTR/Gypsy;Motif.300	138	2
GO:0034654	nucleobase-containing compound biosynthe...	1417	167	91.98	4.8e-16		GO:0004521	endoribonuclease activity	128	37	8.32	3.7e-15		SVE_0615400	Reverse transcriptase domain and Zinc finger, CCHC-type domain-containing protein		SVE_0615400	Reverse transcriptase domain and Zinc finger, CCHC-type domain-containing protein		LTR/Gypsy;Motif.301	346	2
GO:0060249	anatomical structure homeostasis	166	43	10.78	1.4e-15		GO:0004540	ribonuclease activity	150	39	9.75	3.2e-14		SVE_0622700	Protein CBG27949		SVE_0622700	Protein CBG27949		LTR/Gypsy;Motif.319	4799	4
GO:0019438	aromatic compound biosynthetic process	1450	167	94.12	4.3e-15		GO:0004519	endonuclease activity	201	43	13.07	2.2e-12		SVE_0627000	Astacin-like metalloendopeptidase		SVE_0627000	Astacin-like metalloendopeptidase		LTR/Gypsy;Motif.322	832	9
GO:0018130	heterocycle biosynthetic process	1474	167	95.68	2e-14		GO:0008233	peptidase activity	1190	135	77.36	2.9e-11		SVE_0633400	---NA---		SVE_0633400	---NA---		LTR/Gypsy;Motif.325	830	2
GO:1901362	organic cyclic compound biosynthetic pro...	1491	167	96.78	5.8e-14		GO:0070011	peptidase activity, acting on L-amino ac...	1148	131	74.63	4.1e-11		SVE_0633600	Hypothetical protein SRAE_2000170300		SVE_0633600	Hypothetical protein SRAE_2000170300		LTR/Gypsy;Motif.330	13293	9
GO:0051276	chromosome organization	474	65	30.77	4.7e-09		GO:0004518	nuclease activity	251	45	16.32	3.6e-10		SVE_0633800	---NA---		SVE_0633800	---NA---		LTR/Gypsy;Motif.343	9876	1
GO:0006974	cellular response to DNA damage stimulus	343	51	22.26	1.7e-08		GO:0016887	ATPase activity	520	70	33.81	3.4e-09		SVE_0647100	uncharacterized protein K02A2.6-like, partial		SVE_0647100	uncharacterized protein K02A2.6-like, partial		LTR/Gypsy;Motif.35	154	1
GO:0006281	DNA repair	329	49	21.36	3.1e-08		GO:0005488	binding	8241	598	535.75	1.1e-07		SVE_0667200	Hypothetical protein SRAE_X000234300		SVE_0667200	Hypothetical protein SRAE_X000234300		LTR/Gypsy;Motif.363	4748	14
GO:0034645	cellular macromolecule biosynthetic proc...	2008	184	130.34	9.8e-08		GO:0016787	hydrolase activity	3280	272	213.23	9.9e-07		SVE_0668200	collagen alpha-1(XXVII) chain A-like		SVE_0668200	collagen alpha-1(XXVII) chain A-like		LTR/Gypsy;Motif.366	992	4
GO:0009059	macromolecule biosynthetic process	2021	184	131.19	1.6e-07		GO:0140098	catalytic activity, acting on RNA	362	47	23.53	3.9e-06		SVE_0678000	---NA---		SVE_0678000	---NA---		LTR/Gypsy;Motif.367	368	1
GO:0071103	DNA conformation change	182	32	11.81	1.9e-07		GO:0016740	transferase activity	2678	219	174.1	5.5e-05		SVE_0681300	Alpha actinin		SVE_0681300	Alpha actinin		LTR/Gypsy;Motif.378	4296	38
GO:0006508	proteolysis	1374	135	89.19	1.9e-07		GO:0008455	alpha-1,6-mannosylglycoprotein 2-beta-N-...	11	5	0.72	0.00038		SVE_0722000	hypothetical protein Y032_0994g3337		SVE_0722000	hypothetical protein Y032_0994g3337		LTR/Gypsy;Motif.381	1082	1
GO:0032508	DNA duplex unwinding	136	26	8.83	5.1e-07		GO:0046872	metal ion binding	2212	173	143.8	0.00352		SVE_0722600	---NA---		SVE_0722600	---NA---		LTR/Gypsy;Motif.383	8722	20
GO:0044271	cellular nitrogen compound biosynthetic ...	1951	176	126.64	6.5e-07		GO:0140103	catalytic activity, acting on a glycopro...	24	6	1.56	0.00362		SVE_0722700	Hypothetical protein SRAE_0000060100		SVE_0722700	Hypothetical protein SRAE_0000060100		LTR/Gypsy;Motif.406	1095	4
GO:0032392	DNA geometric change	138	26	8.96	6.8e-07		GO:0043169	cation binding	2226	173	144.71	0.00458		SVE_0723400	hypothetical protein BSL78_10692		SVE_0723400	hypothetical protein BSL78_10692		LTR/Gypsy;Motif.423	4974	50
GO:0033554	cellular response to stress	400	51	25.96	2.2e-06		GO:0017111	nucleoside-triphosphatase activity	853	74	55.45	0.00599		SVE_0723500	---NA---		SVE_0723500	---NA---		LTR/Gypsy;Motif.441	2194	2
GO:0042592	homeostatic process	337	45	21.88	2.6e-06		GO:0016462	pyrophosphatase activity	875	75	56.88	0.00757		SVE_0723900	Reverse transcriptase domain and Integrase,catalytic core domain and Ribonuclease H-like domain and AT hook-like family and Aspartic peptidase domain-containing protein		SVE_0723900	Reverse transcriptase domain and Integrase,catalytic core domain and Ribonuclease H-like domain and AT hook-like family and Aspartic peptidase domain-containing protein		LTR/Gypsy;Motif.442	2713	2
GO:0006310	DNA recombination	181	29	11.75	5e-06		GO:0016818	hydrolase activity, acting on acid anhyd...	879	75	57.14	0.00842		SVE_0733800	---NA---		SVE_0733800	---NA---		LTR/Gypsy;Motif.450	827	3
GO:0090502	RNA phosphodiester bond hydrolysis, endo...	98	19	6.36	1.4e-05		GO:0016817	hydrolase activity, acting on acid anhyd...	885	75	57.53	0.00985		SVE_0734200	Nematode fatty acid retinoid binding family-containing protein		SVE_0734200	Nematode fatty acid retinoid binding family-containing protein		LTR/Gypsy;Motif.452	833	3
GO:0090501	RNA phosphodiester bond hydrolysis	129	21	8.37	7.9e-05									SVE_0759400	Reverse transcriptase domain and Integrase,catalytic core domain and Ribonuclease H-like domain and Aspartic peptidase domain-containing protein		SVE_0759400	Reverse transcriptase domain and Integrase,catalytic core domain and Ribonuclease H-like domain and Aspartic peptidase domain-containing protein		LTR/Gypsy;Motif.453	2246	10
GO:0009312	oligosaccharide biosynthetic process	15	5	0.97	0.002		GO.ID	Adults-CC	Annotated	Significant	Expected	Fis		SVE_0767700	---NA---		SVE_0767700	---NA---		LTR/Gypsy;Motif.456	6360	32
GO:0090305	nucleic acid phosphodiester bond hydroly...	219	26	14.22	0.002		GO:0000943	retrotransposon nucleocapsid	14	9	0.41	2.6e-11		SVE_0767900	Reverse transcriptase domain and Integrase,catalytic core domain and Ribonuclease H-like domain and AT hook-like family and Aspartic peptidase domain-containing protein		SVE_0767900	Reverse transcriptase domain and Integrase,catalytic core domain and Ribonuclease H-like domain and AT hook-like family and Aspartic peptidase domain-containing protein		LTR/Gypsy;Motif.47	1475	5
GO:0009058	biosynthetic process	2605	200	169.09	0.0027		GO:0031248	protein acetyltransferase complex	36	6	1.06	0.00057		SVE_0768000	Reverse transcriptase domain and Integrase,catalytic core domain and Ribonuclease H-like domain and AT hook-like family and Aspartic peptidase domain-containing protein		SVE_0768000	Reverse transcriptase domain and Integrase,catalytic core domain and Ribonuclease H-like domain and AT hook-like family and Aspartic peptidase domain-containing protein		LTR/Gypsy;Motif.48	1750	12
GO:1901576	organic substance biosynthetic process	2530	192	164.22	0.0058		GO:1902493	acetyltransferase complex	36	6	1.06	0.00057		SVE_0769700	---NA---		SVE_0769700	---NA---		LTR/Gypsy;Motif.490	249	2
GO:0030261	chromosome condensation	19	5	1.23	0.0061		GO:0031984	organelle subcompartment	50	7	1.47	0.0006		SVE_0769800	---NA---		SVE_0769800	---NA---		LTR/Gypsy;Motif.510	367	1
GO:0044249	cellular biosynthetic process	2505	190	162.6	0.0062		GO:0098791	Golgi apparatus subcompartment	50	7	1.47	0.0006		SVE_0770600	---NA---		SVE_0770600	---NA---		LTR/Gypsy;Motif.514	429	9
GO:0006323	DNA packaging	28	6	1.82	0.008		GO:0000794	condensed nuclear chromosome	8	3	0.24	0.00127		SVE_0797200	---NA---		SVE_0797200	---NA---		LTR/Gypsy;Motif.523	7160	4
							GO:0005576	extracellular region	417	24	12.27	0.00127		SVE_0797300	---NA---		SVE_0797300	---NA---		LTR/Gypsy;Motif.580	776	7
							GO:0005795	Golgi stack	44	6	1.29	0.0017		SVE_0797700	---NA---		SVE_0797700	---NA---		LTR/Gypsy;Motif.581	529	4
							GO:0000123	histone acetyltransferase complex	32	5	0.94	0.00223		SVE_0813400	Astacin-like metalloendopeptidase		SVE_0813400	Astacin-like metalloendopeptidase		LTR/Gypsy;Motif.589	509	3
							GO:0000793	condensed chromosome	43	5	1.27	0.00822		SVE_0831700	Reverse transcriptase domain and Zinc finger, CCHC-type domain-containing protein		SVE_0831700	Reverse transcriptase domain and Zinc finger, CCHC-type domain-containing protein		LTR/Gypsy;Motif.590	150	3
														SVE_0833800	---NA---		SVE_0833800	---NA---		LTR/Gypsy;Motif.591	503	9
b) 27G GO terms targeting 3'UTR														SVE_0850300	---NA---		SVE_0850300	---NA---		LTR/Gypsy;Motif.593	4910	1
GO.ID	Adults-BP	Annotated	Significant	Expected	Fis		GO.ID	Adults-MF	Annotated	Significant	Expected	Fis		SVE_0851000	---NA---		SVE_0851000	---NA---		LTR/Gypsy;Motif.604	1717	1
GO:0006259	DNA metabolic process	1149	263	42.2	< 1e-30		GO:0003964	RNA-directed DNA polymerase activity	261	117	9.28	< 1e-30		SVE_0851100	---NA---		SVE_0851100	---NA---		LTR/Gypsy;Motif.606	1069	1
GO:0015074	DNA integration	636	176	23.36	< 1e-30		GO:0034061	DNA polymerase activity	278	118	9.89	< 1e-30		SVE_0851200	Reverse transcriptase domain and Integrase, catalytic core domain and Ribonuclease H-like domain and Aspartic peptidase domain-containing protein		SVE_0851200	Reverse transcriptase domain and Integrase, catalytic core domain and Ribonuclease H-like domain and Aspartic peptidase domain-containing protein		LTR/Gypsy;Motif.612	511	5
GO:0006278	RNA-dependent DNA biosynthetic process	261	117	9.59	< 1e-30		GO:0140097	catalytic activity, acting on DNA	536	146	19.06	< 1e-30		SVE_0851600	Reverse transcriptase domain-containing protein		SVE_0851600	Reverse transcriptase domain-containing protein		LTR/Gypsy;Motif.617	2415	10
GO:0071897	DNA biosynthetic process	290	118	10.65	< 1e-30		GO:0016779	nucleotidyltransferase activity	399	118	14.19	< 1e-30		SVE_0851700	Reverse transcriptase domain-containing protein		SVE_0851700	Reverse transcriptase domain-containing protein		LTR/Gypsy;Motif.618	2616	12
GO:0090304	nucleic acid metabolic process	2563	274	94.13	< 1e-30		GO:0003676	nucleic acid binding	3047	245	108.38	< 1e-30		SVE_0852000	reverse transcriptase		SVE_0852000	reverse transcriptase		LTR/Gypsy;Motif.623	108	1
GO:0006139	nucleobase-containing compound metabolic...	2906	276	106.72	< 1e-30		GO:0004190	aspartic-type endopeptidase activity	206	54	7.33	< 1e-30		SVE_0852100	reverse transcriptase		SVE_0852100	reverse transcriptase		LTR/Gypsy;Motif.629	110	1
GO:0046483	heterocycle metabolic process	2973	276	109.18	< 1e-30		GO:0070001	aspartic-type peptidase activity	206	54	7.33	< 1e-30		SVE_0852200	---NA---		SVE_0852200	---NA---		LTR/Gypsy;Motif.634	871	3
GO:0006725	cellular aromatic compound metabolic pro...	2974	276	109.22	< 1e-30		GO:0016772	transferase activity, transferring phosp...	1395	130	49.62	9.7e-27		SVE_0884800	---NA---		SVE_0884800	---NA---		LTR/Gypsy;Motif.635	2252	10
GO:1901360	organic cyclic compound metabolic proces...	3012	276	110.61	< 1e-30		GO:0097159	organic cyclic compound binding	5130	287	182.47	7.6e-26		SVE_1076300	---NA---		SVE_1076300	---NA---		LTR/Gypsy;Motif.640	5294	5
GO:0034641	cellular nitrogen compound metabolic pro...	3387	279	124.39	< 1e-30		GO:1901363	heterocyclic compound binding	5128	286	182.39	2.1e-25		SVE_1076400	Moulting cycle MLT-10-like protein family-containing protein		SVE_1076400	Moulting cycle MLT-10-like protein family-containing protein		LTR/Gypsy;Motif.644	425	5
GO:0043170	macromolecule metabolic process	5601	326	205.69	< 1e-30		GO:0008270	zinc ion binding	893	84	31.76	5e-17		SVE_1080500	---NA---		SVE_1080500	---NA---		LTR/Gypsy;Motif.650	511	2
GO:0044260	cellular macromolecule metabolic process	4280	285	157.18	< 1e-30		GO:0046914	transition metal ion binding	1062	85	37.77	4.1e-13		SVE_1094100	Hypothetical protein SRAE_0000051000		SVE_1094100	Hypothetical protein SRAE_0000051000		LTR/Gypsy;Motif.652	189	2
GO:0006807	nitrogen compound metabolic process	5921	327	217.45	< 1e-30		GO:0004523	RNA-DNA hybrid ribonuclease activity	90	21	3.2	4e-12		SVE_1106400	Zinc finger, CCHC-type domain-containing protein		SVE_1106400	Zinc finger, CCHC-type domain-containing protein		LTR/Gypsy;Motif.662	5261	8
GO:0044238	primary metabolic process	6302	329	231.44	< 1e-30		GO:0004386	helicase activity	329	40	11.7	7.7e-12		SVE_1106600	---NA---		SVE_1106600	---NA---		LTR/Gypsy;Motif.667	266	1
GO:0071704	organic substance metabolic process	6490	331	238.34	< 1e-30		GO:0004175	endopeptidase activity	871	72	30.98	8.1e-12		SVE_1106700	Reverse transcriptase domain and Integrase, catalytic core domain and Ribonuclease H-like domain and Aspartic peptidase domain-containing protein		SVE_1106700	Reverse transcriptase domain and Integrase, catalytic core domain and Ribonuclease H-like domain and Aspartic peptidase domain-containing protein		LTR/Gypsy;Motif.676	138	1
GO:0044237	cellular metabolic process	5637	298	207.02	7.3e-26		GO:0016891	endoribonuclease activity, producing 5'-...	103	22	3.66	8.2e-12		SVE_1107000	Integrase, catalytic core domain and Ribonuclease H-like domain-containing protein		SVE_1107000	Integrase, catalytic core domain and Ribonuclease H-like domain-containing protein		LTR/Gypsy;Motif.677	985	2
GO:0008152	metabolic process	7171	335	263.35	1.8e-23		GO:0016893	endonuclease activity, active with eithe...	109	22	3.88	2.7e-11		SVE_1107400	---NA---		SVE_1107400	---NA---		LTR/Gypsy;Motif.678	4027	5
GO:0034654	nucleobase-containing compound biosynthe...	1417	123	52.04	6.8e-22		GO:0003678	DNA helicase activity	191	29	6.79	3.1e-11		SVE_1107600	---NA---		SVE_1107600	---NA---		LTR/Gypsy;Motif.68	1084	4
GO:0019438	aromatic compound biosynthetic process	1450	123	53.25	5.2e-21		GO:0004521	endoribonuclease activity	128	23	4.55	1.1e-10		SVE_1107700	Reverse transcriptase domain and Integrase, catalytic core domain and Ribonuclease H-like domain and AT hook-like family and Aspartic peptidase domain-containing protein		SVE_1107700	Reverse transcriptase domain and Integrase, catalytic core domain and Ribonuclease H-like domain and AT hook-like family and Aspartic peptidase domain-containing protein		LTR/Gypsy;Motif.682	248	2
GO:0018130	heterocycle biosynthetic process	1474	123	54.13	2.2e-20		GO:0008094	DNA-dependent ATPase activity	205	29	7.29	1.8e-10		SVE_1121900	Reverse transcriptase domain and Integrase,catalytic core domain and Ribonuclease H-like domain and Aspartic peptidase domain-containing protein		SVE_1121900	Reverse transcriptase domain and Integrase,catalytic core domain and Ribonuclease H-like domain and Aspartic peptidase domain-containing protein		LTR/Gypsy;Motif.690	675	1
GO:1901362	organic cyclic compound biosynthetic pro...	1491	123	54.76	5.8e-20		GO:0004540	ribonuclease activity	150	23	5.34	3e-09		SVE_1122000	---NA---		SVE_1122000	---NA---		LTR/Gypsy;Motif.693	781	8
GO:0044271	cellular nitrogen compound biosynthetic ...	1951	126	71.65	6.1e-12		GO:0004519	endonuclease activity	201	25	7.15	4.7e-08		SVE_1123900	Reverse transcriptase domain-containing protein		SVE_1123900	Reverse transcriptase domain-containing protein		LTR/Gypsy;Motif.694	2149	37
GO:0000723	telomere maintenance	154	27	5.66	9.1e-12		GO:0016740	transferase activity	2678	142	95.25	7.3e-08		SVE_1124700	---NA---		SVE_1124700	---NA---		LTR/Gypsy;Motif.695	2262	35
GO:0034645	cellular macromolecule biosynthetic proc...	2008	128	73.74	9.6e-12		GO:0008233	peptidase activity	1190	76	42.33	2.4e-07		SVE_1126700	---NA---		SVE_1125000	---NA---		LTR/Gypsy;Motif.697	722	12
GO:0032200	telomere organization	155	27	5.69	1.1e-11		GO:0070011	peptidase activity, acting on L-amino ac...	1148	73	40.83	5.2e-07		SVE_1126800	---NA---		SVE_1126700	---NA---		LTR/Gypsy;Motif.76	340	1
GO:0009059	macromolecule biosynthetic process	2021	128	74.22	1.5e-11		GO:0016887	ATPase activity	520	42	18.5	5.3e-07		SVE_1154100	---NA---		SVE_1126800	---NA---		LTR/Gypsy;Motif.77	341	1
GO:0060249	anatomical structure homeostasis	166	27	6.1	5.5e-11		GO:0004518	nuclease activity	251	25	8.93	3.2e-06		SVE_1186000	Reverse transcriptase domain and Integrase,catalytic core domain and Ribonuclease H-like domain and AT hook-like family and Aspartic peptidase domain-containing protein		SVE_1154100	---NA---		LTR/Gypsy;Motif.79	2252	9
GO:0044249	cellular biosynthetic process	2505	132	92	1.3e-06		GO:0016787	hydrolase activity	3280	150	116.66	0.00018		SVE_1186100	---NA---		SVE_1186000	Reverse transcriptase domain and Integrase,catalytic core domain and Ribonuclease H-like domain and AT hook-like family and Aspartic peptidase domain-containing protein		LTR/Gypsy;Motif.81	870	3
GO:0032508	DNA duplex unwinding	136	18	4.99	2.2e-06		GO:0140098	catalytic activity, acting on RNA	362	25	12.88	0.00119		SVE_1186200	---NA---		SVE_1186100	---NA---		LTR/Gypsy;Motif.86	3862	1
GO:1901576	organic substance biosynthetic process	2530	132	92.91	2.3e-06		GO:0005488	binding	8241	319	293.12	0.00245		SVE_1218400	---NA---		SVE_1186200	---NA---		LTR/Gypsy;Motif.87	2624	19
GO:0090502	RNA phosphodiester bond hydrolysis, endo...	98	15	3.6	2.5e-06									SVE_1228400	Reverse transcriptase domain and Integrase,catalytic core domain and Ribonuclease H-like domain and AT hook-like family and Aspartic peptidase domain-containing protein		SVE_1218400	---NA---		LTR/Gypsy;Motif.90	139	2
GO:0032392	DNA geometric change	138	18	5.07	2.8e-06		GO.ID	Adults-CC	Annotated	Significant	Expected	Fis		SVE_1244400	Reverse transcriptase domain and Aspartic peptidase domain-containing protein		SVE_1228400	Reverse transcriptase domain and Integrase,catalytic core domain and Ribonuclease H-like domain and AT hook-like family and Aspartic peptidase domain-containing protein		LTR/Gypsy;Motif.91	724	6
GO:0006974	cellular response to DNA damage stimulus	343	30	12.6	8.7e-06		GO:0000943	retrotransposon nucleocapsid	14	5	0.18	5.3e-07		SVE_1246000	Reverse transcriptase domain-containing protein		SVE_1244400	Reverse transcriptase domain and Aspartic peptidase domain-containing protein		SINE/5S;Motif:rnd-1.16	284	1
GO:0006281	DNA repair	329	29	12.08	1.1e-05									SVE_1246500	---NA---		SVE_1246000	Reverse transcriptase domain-containing protein		SINE/5S;Motif:rnd-1.28	141	3
GO:0009058	biosynthetic process	2605	132	95.67	1.2e-05									SVE_1246600	---NA---		SVE_1246500	---NA---		SINE/ID;Motif:rnd-1.11	95	1
GO:0006310	DNA recombination	181	19	6.65	3.5e-05									SVE_1248200	TPA: polyprotein		SVE_1246600	---NA---		SINE/ID;Motif:rnd-1.21	335	3
GO:0006508	proteolysis	1374	78	50.46	3.8e-05									SVE_1248900	Retrovirus-related Pol poly from transposon TNT 1-94		SVE_1248200	TPA: polyprotein		SINE/ID;Motif:rnd-1.26	72	1
GO:0071103	DNA conformation change	182	19	6.68	3.8e-05									SVE_1252100	NC domain protein		SVE_1248900	Retrovirus-related Pol poly from transposon TNT 1-94		SINE/ID;Motif:rnd-1.29	324	1
GO:0042592	homeostatic process	337	28	12.38	4.4e-05									SVE_1252200	NC domain protein		SVE_1252100	NC domain protein		SINE/ID;Motif:rnd-1.33	133	1
GO:0090501	RNA phosphodiester bond hydrolysis	129	15	4.74	7.4e-05									SVE_1252500	---NA---		SVE_1252200	NC domain protein		SINE/ID;Motif:rnd-1.34	134	2
GO:0033554	cellular response to stress	400	30	14.69	0.00016									SVE_1266500	Reverse transcriptase domain and Integrase, catalytic core domain and Zinc finger, CCHC-type domain and Ribonuclease H-like domain-containing protein		SVE_1252500	---NA---		SINE?;Motif:rnd-1.22	81	1
GO:0051276	chromosome organization	474	32	17.41	0.00062									SVE_1267000	Hypothetical protein SRAE_0000047600		SVE_1266500	Reverse transcriptase domain and Integrase, catalytic core domain and Zinc finger, CCHC-type domain and Ribonuclease H-like domain-containing protein		SINE?;Motif:rnd-1.30	68	1
GO:0090305	nucleic acid phosphodiester bond hydroly...	219	17	8.04	0.0029									SVE_1274400	---NA---		SVE_1267000	Hypothetical protein SRAE_0000047600		SINE?;Motif:rnd-1.41	1883	1
														SVE_1274500	---NA---		SVE_1274400	---NA---		SINE?;Motif:rnd-1.55	68	1
														SVE_1278000	---NA---		SVE_1274500	---NA---		SINE?;Motif:rnd-1.62	89	1
														SVE_1278300	Hypothetical protein SRAE_X000234600		SVE_1278000	---NA---		SINE?;Motif:rnd-1.65	1163	1
														SVE_1302700	Transposon Ty3-I Gag-Pol polyprotein		SVE_1278300	Hypothetical protein SRAE_X000234600		SINE?;Motif:rnd-1.73	68	1
														SVE_1302800	putative reverse transcriptase domain-containing protein		SVE_1302700	Transposon Ty3-I Gag-Pol polyprotein		SINE?;Motif:rnd-1.76	1869	1
														SVE_1303000	---NA---		SVE_1302800	putative reverse transcriptase domain-containing protein		SINE?;Motif:rnd-1.8	1884	4
														SVE_1316500	reverse transcriptase		SVE_1303000	---NA---		SINE?;Motif:rnd-1.82	1199	4
														SVE_1317700	Reverse transcriptase domain-containing protein		SVE_1316500	reverse transcriptase		SINE?;Motif:rnd-1.84	595	1
														SVE_1317800	Reverse transcriptase domain-containing protein		SVE_1317700	Reverse transcriptase domain-containing protein		SINE?;Motif:rnd-1.99	1409	2
														SVE_1318300	Hypothetical protein SRAE_X000234600		SVE_1317800	Reverse transcriptase domain-containing protein		DNA/Ginger-2;Motif:rnd-1.1	1105	8
														SVE_1318900	GPCR, rhodopsin-like, 7TM domain and 7TM GPCR, serpentine receptor class v (Srv) family-containing protein		SVE_1318300	Hypothetical protein SRAE_X000234600		DNA/Ginger-2;Motif:rnd-1.2	3287	28
														SVE_1333900	hypothetical protein BOX15_Mlig001469g3		SVE_1318900	GPCR, rhodopsin-like, 7TM domain and 7TM GPCR, serpentine receptor class v (Srv) family-containing protein		DNA/Ginger-2;Motif:rnd-1.3	278	9
														SVE_1334200	---NA---		SVE_1333900	hypothetical protein BOX15_Mlig001469g3		DNA/Ginger-2;Motif:rnd-1.4	569	15
														SVE_1335700	Transposon Tf2-6 polyprotein		SVE_1334200	---NA---		DNA/Ginger-2;Motif:rnd-1.5	482	9
														SVE_1335800	---NA---		SVE_1335700	Transposon Tf2-6 polyprotein		DNA/Ginger-2;Motif:rnd-1.6	637	9
														SVE_1398300	Reverse transcriptase domain and Integrase,catalytic core domain and Ribonuclease H-like domain and Aspartic peptidase domain-containing protein		SVE_1335800	---NA---		DNA/Merlin;Motif:rnd-1.1	1220	2
														SVE_1439500	Reverse transcriptase domain-containing protein		SVE_1398300	Reverse transcriptase domain and Integrase,catalytic core domain and Ribonuclease H-like domain and Aspartic peptidase domain-containing protein		DNA/Merlin;Motif:rnd-1.10	1218	3
														SVE_1439600	---NA---		SVE_1439500	Reverse transcriptase domain-containing protein		DNA/Merlin;Motif:rnd-1.11	1184	1
														SVE_1439700	---NA---		SVE_1439600	---NA---		DNA/Merlin;Motif:rnd-1.17	820	2
														SVE_1439800	---NA---		SVE_1439700	---NA---		DNA/Merlin;Motif:rnd-1.4	914	3
														SVE_1463500	Reverse transcriptase domain and Integrase,catalytic core domain and Ribonuclease H-like domain and AT hook-like family and Aspartic peptidase domain-containing protein		SVE_1439800	---NA---		DNA/Merlin;Motif:rnd-1.6	1048	4
														SVE_1463600	Reverse transcriptase domain and Integrase,catalytic core domain and Ribonuclease H-like domain and AT hook-like family and Aspartic peptidase domain-containing protein		SVE_1463500	Reverse transcriptase domain and Integrase,catalytic core domain and Ribonuclease H-like domain and AT hook-like family and Aspartic peptidase domain-containing protein		DNA/Merlin;Motif:rnd-1.9	1218	1
														SVE_1463700	Reverse transcriptase domain and Integrase,catalytic core domain and Ribonuclease H-like domain and AT hook-like family and Aspartic peptidase domain-containing protein		SVE_1463600	Reverse transcriptase domain and Integrase,catalytic core domain and Ribonuclease H-like domain and AT hook-like family and Aspartic peptidase domain-containing protein		DNA/TcMar-Mariner;Motif:ltr-1.104	1961	44
														SVE_1464000	Reverse transcriptase domain and Integrase,catalytic core domain and Ribonuclease H-like domain and AT hook-like family and Aspartic peptidase domain-containing protein		SVE_1463700	Reverse transcriptase domain and Integrase,catalytic core domain and Ribonuclease H-like domain and AT hook-like family and Aspartic peptidase domain-containing protein		DNA/TcMar-Mariner;Motif:ltr-1.26	4091	16
														SVE_1464100	---NA---		SVE_1464000	Reverse transcriptase domain and Integrase,catalytic core domain and Ribonuclease H-like domain and AT hook-like family and Aspartic peptidase domain-containing protein		DNA/TcMar-Mariner;Motif:ltr-1.27	4083	4
														SVE_1464200	---NA---		SVE_1464100	---NA---		DNA/TcMar-Mariner;Motif:ltr-1.60	445	5
														SVE_1473600	enzymatic polyprotein endonuclease reverse		SVE_1464200	---NA---		DNA/TcMar-Mariner;Motif:ltr-1.61	480	5
														SVE_1473800	Hypothetical protein SRAE_0000047000		SVE_1473600	enzymatic polyprotein endonuclease reverse		DNA/TcMar-Mariner;Motif:rnd-1.18	142	2
														SVE_1480800	Spectrin beta chain, erythrocytic		SVE_1473800	Hypothetical protein SRAE_0000047000		DNA/TcMar-Mariner;Motif:rnd-1.19	151	1
														SVE_1480900	Spectrin beta chain, erythrocytic		SVE_1480800	Spectrin beta chain, erythrocytic		DNA/TcMar-Mariner;Motif:rnd-1.190	698	8
														SVE_1481000	Spectrin beta chain, erythrocytic		SVE_1480900	Spectrin beta chain, erythrocytic		DNA/TcMar-Mariner;Motif:rnd-1.196	710	10
														SVE_1481300	---NA---		SVE_1481000	Spectrin beta chain, erythrocytic		DNA/TcMar-Mariner;Motif:rnd-1.89	2123	1
														SVE_1489900	Reverse transcriptase domain and Integrase, catalytic core domain and Zinc finger, CCHC-type domain and Ribonuclease H-like domain and Aspartic peptidase domain-containing protein		SVE_1481300	---NA---		DNA/TcMar-Mariner;Motif:rnd-1.90	2402	1
														SVE_1517200	Reverse transcriptase domain-containing protein		SVE_1489900	Reverse transcriptase domain and Integrase, catalytic core domain and Zinc finger, CCHC-type domain and Ribonuclease H-like domain and Aspartic peptidase domain-containing protein		DNA/TcMar-Mariner;Motif:rnd-1.91	2381	1
														SVE_1517300	Reverse transcriptase domain-containing protein		SVE_1517200	Reverse transcriptase domain-containing protein		RC/Helitron;Motif:rnd-1.102	1876	1
														SVE_1517400	Reverse transcriptase domain-containing protein		SVE_1517300	Reverse transcriptase domain-containing protein		RC/Helitron;Motif:rnd-1.111	1580	1
														SVE_1517600	Reverse transcriptase domain-containing protein		SVE_1517400	Reverse transcriptase domain-containing protein		RC/Helitron;Motif:rnd-1.14	4492	1
														SVE_1517800	---NA---		SVE_1517600	Reverse transcriptase domain-containing protein		RC/Helitron;Motif:rnd-1.162	1997	1
														SVE_1525700	Reverse transcriptase domain-containing protein		SVE_1517800	---NA---		RC/Helitron;Motif:rnd-1.165	1542	1
														SVE_1525900	Reverse transcriptase domain-containing protein		SVE_1525700	Reverse transcriptase domain-containing protein		RC/Helitron;Motif:rnd-1.167	2215	2
														SVE_1526100	Reverse transcriptase domain-containing protein		SVE_1525900	Reverse transcriptase domain-containing protein		RC/Helitron;Motif:rnd-1.175	106	1
														SVE_1665600	Reverse transcriptase domain and Integrase, catalytic core domain and Zinc finger, CCHC-type domain and Peptidase A2A, retrovirus, catalytic domain and Ribonuclease H-like domain and Peptidase A2A, retrovirus RVP subgroup domain and Aspartic peptidase domain-containing protein		SVE_1526100	Reverse transcriptase domain-containing protein		RC/Helitron;Motif:rnd-1.176	3457	1
														SVE_1671400	---NA---		SVE_1665600	Reverse transcriptase domain and Integrase, catalytic core domain and Zinc finger, CCHC-type domain and Peptidase A2A, retrovirus, catalytic domain and Ribonuclease H-like domain and Peptidase A2A, retrovirus RVP subgroup domain and Aspartic peptidase domain-containing protein		RC/Helitron;Motif:rnd-1.185	292	1
														SVE_1687400	---NA---		SVE_1671400	---NA---		RC/Helitron;Motif:rnd-1.186	1538	1
														SVE_1777200	Hypothetical protein SRAE_0000068000		SVE_1687400	---NA---		RC/Helitron;Motif:rnd-1.210	2990	1
														SVE_1781500	integrase core domain protein		SVE_1777200	Hypothetical protein SRAE_0000068000		RC/Helitron;Motif:rnd-1.213	1938	3
														SVE_1918500	Hypothetical protein SRAE_X000235100		SVE_1781500	integrase core domain protein		RC/Helitron;Motif:rnd-1.228	148	1
														SVE_1921000	---NA---		SVE_1918500	Hypothetical protein SRAE_X000235100		RC/Helitron;Motif:rnd-1.230	1249	2
														SVE_1921100	---NA---		SVE_1921000	---NA---		RC/Helitron;Motif:rnd-1.234	3788	1
														SVE_1921300	hypothetical protein CRE_27914, partial		SVE_1921100	---NA---		RC/Helitron;Motif:rnd-1.236	1463	1
														SVE_1925600	Reverse transcriptase domain-containing protein		SVE_1921300	hypothetical protein CRE_27914, partial		RC/Helitron;Motif:rnd-1.243	4222	1
														SVE_1925700	---NA---		SVE_1925600	Reverse transcriptase domain-containing protein		RC/Helitron;Motif:rnd-1.244	3109	2
														SVE_1926000	Hypothetical protein SRAE_0000068000		SVE_1925700	---NA---		RC/Helitron;Motif:rnd-1.248	1209	2
														SVE_1926400	Reverse transcriptase domain and Integrase,catalytic core domain and Ribonuclease H-like domain and AT hook-like family and Aspartic peptidase domain-containing protein		SVE_1926000	Hypothetical protein SRAE_0000068000		RC/Helitron;Motif:rnd-1.35	2252	1
														SVE_1926500	---NA---		SVE_1926400	Reverse transcriptase domain and Integrase,catalytic core domain and Ribonuclease H-like domain and AT hook-like family and Aspartic peptidase domain-containing protein		RC/Helitron;Motif:rnd-1.38	1097	1
														SVE_1962700	ATP-dependent RNA helicase A isoform X1		SVE_1926500	---NA---		RC/Helitron;Motif:rnd-1.49	4495	2
														SVE_1963200	---NA---		SVE_1962700	ATP-dependent RNA helicase A isoform X1		RC/Helitron;Motif:rnd-1.50	3392	1
														SVE_1963400	---NA---		SVE_1963200	---NA---		RC/Helitron;Motif:rnd-1.75	1226	1
														SVE_1993800	---NA---		SVE_1963400	---NA---		RC/Helitron;Motif:rnd-1.88	2953	2
														SVE_1993900	---NA---		SVE_1993800	---NA---		tRNA;Motif:rnd-1.102	1927	4
														SVE_1998300	---NA---		SVE_1993900	---NA---		tRNA;Motif:rnd-1.104	1322	2
														SVE_2003200	---NA---		SVE_1998300	---NA---		tRNA;Motif:rnd-1.113	1921	5
														SVE_2005400	---NA---		SVE_2003200	---NA---		tRNA;Motif:rnd-1.120	57	1
														SVE_2010200	---NA---		SVE_2005400	---NA---		tRNA;Motif:rnd-1.136	77	1
														SVE_2011200	Reverse transcriptase domain and Integrase,catalytic core domain and Ribonuclease H-like domain and Aspartic peptidase domain-containing protein		SVE_2010200	---NA---		tRNA;Motif:rnd-1.148	2079	6
														SVE_2015300	---NA---		SVE_2011200	Reverse transcriptase domain and Integrase,catalytic core domain and Ribonuclease H-like domain and Aspartic peptidase domain-containing protein		tRNA;Motif:rnd-1.15	83	1
														SVE_2016300	---NA---		SVE_2013700	unnamed protein product		tRNA;Motif:rnd-1.150	335	2
														SVE_2019300	---NA---		SVE_2014600	---NA---		tRNA;Motif:rnd-1.151	184	1
														SVE_0093900	TPA_exp: gag-pol protein		SVE_2015300	---NA---		tRNA;Motif:rnd-1.153	156	1
														SVE_0113800	---NA---		SVE_2015500	histone-lysine N-methyltransferase SETMAR isoform X1		tRNA;Motif:rnd-1.156	1262	2
														SVE_0173700	C-type lectin domain and C-type lectin-like domain and C-type lectin fold domain-containing protein		SVE_2016300	---NA---		tRNA;Motif:rnd-1.168	84	1
														SVE_0381800	hypothetical protein B566_EDAN018368		SVE_2019300	---NA---		tRNA;Motif:rnd-1.169	74	1
														SVE_0543900	Transposase, ISXO2-like domain-containing protein		SVE_0093900	TPA_exp: gag-pol protein		tRNA;Motif:rnd-1.187	43	1
														SVE_0597800	coat protein		SVE_0113800	---NA---		tRNA;Motif:rnd-1.19	86	1
														SVE_0603600	Reverse transcriptase domain-containing protein		SVE_0173700	C-type lectin domain and C-type lectin-like domain and C-type lectin fold domain-containing protein		tRNA;Motif:rnd-1.191	941	7
														SVE_0611400	Reverse transcriptase domain and Aspartic peptidase domain-containing protein		SVE_0381800	hypothetical protein B566_EDAN018368		tRNA;Motif:rnd-1.203	397	1
														SVE_0614000	---NA---		SVE_0543900	Transposase, ISXO2-like domain-containing protein		tRNA;Motif:rnd-1.223	121	1
														SVE_0671500	---NA---		SVE_0597800	coat protein		tRNA;Motif:rnd-1.277	1784	4
														SVE_0686300	---NA---		SVE_0603600	Reverse transcriptase domain-containing protein		tRNA;Motif:rnd-1.278	336	1
														SVE_0768100	Superkiller viralicidic activity 2-like 2		SVE_0611400	Reverse transcriptase domain and Aspartic peptidase domain-containing protein		tRNA;Motif:rnd-1.321	82	1
														SVE_0768600	---NA---		SVE_0614000	---NA---		tRNA;Motif:rnd-1.323	43	1
														SVE_0770300	ATP-dependent RNA helicase DHX36		SVE_0671500	---NA---		tRNA;Motif:rnd-1.326	1140	1
														SVE_0797800	---NA---		SVE_0675100	Astacin-like metalloendopeptidase		tRNA;Motif:rnd-1.343	1912	3
														SVE_0893000	---NA---		SVE_0686300	---NA---		tRNA;Motif:rnd-1.355	815	1
														SVE_0897300	---NA---		SVE_0759000	---NA---		tRNA;Motif:rnd-1.356	94	3
														SVE_1153200	DNA/RNA helicase, DEAD/DEAH box type, N-terminal domain and Helicase, superfamily 1/2, ATP-binding domain and P-loop containing nucleoside triphosphate hydrolase domain-containing protein		SVE_0768100	Superkiller viralicidic activity 2-like 2		tRNA;Motif:rnd-1.357	736	1
														SVE_1158800	Hypothetical protein SRAE_1000041900		SVE_0768600	---NA---		tRNA;Motif:rnd-1.358	436	1
														SVE_1253700	---NA---		SVE_0770300	ATP-dependent RNA helicase DHX36		tRNA;Motif:rnd-1.37	413	1
														SVE_1279500	---NA---		SVE_0797800	---NA---		tRNA;Motif:rnd-1.377	1255	2
														SVE_1333400	---NA---		SVE_0893000	---NA---		tRNA;Motif:rnd-1.378	77	1
														SVE_1438800	---NA---		SVE_0897300	---NA---		tRNA;Motif:rnd-1.379	214	1
														SVE_1517500	Reverse transcriptase domain-containing protein		SVE_1153200	DNA/RNA helicase, DEAD/DEAH box type, N-terminal domain and Helicase, superfamily 1/2, ATP-binding domain and P-loop containing nucleoside triphosphate hydrolase domain-containing protein		tRNA;Motif:rnd-1.392	105	4
														SVE_1778100	---NA---		SVE_1158800	Hypothetical protein SRAE_1000041900		tRNA;Motif:rnd-1.394	92	2
														SVE_1780300	---NA---		SVE_1253700	---NA---		tRNA;Motif:rnd-1.396	91	1
														SVE_1915000	---NA---		SVE_1279500	---NA---		tRNA;Motif:rnd-1.398	235	1
														SVE_0074100	---NA---		SVE_1333400	---NA---		tRNA;Motif:rnd-1.399	444	1
														SVE_0092400	Reverse transcriptase domain and Aspartic peptidase domain-containing protein		SVE_1438800	---NA---		tRNA;Motif:rnd-1.403	928	5
														SVE_0113700	---NA---		SVE_1517500	Reverse transcriptase domain-containing protein		tRNA;Motif:rnd-1.405	83	1
														SVE_0114500	Zinc finger, CCHC-type domain and Aspartic peptidase domain-containing protein		SVE_1778100	---NA---		tRNA;Motif:rnd-1.409	1231	4
														SVE_0166100	---NA---		SVE_1780300	---NA---		tRNA;Motif:rnd-1.413	1566	1
														SVE_0166500	---NA---		SVE_2016600	---NA---		tRNA;Motif:rnd-1.414	1536	3
														SVE_0166700	DNA helicase Pif1 like family and P-loop containing nucleoside triphosphate hydrolase domain-containing protein		SVE_1915000	---NA---		tRNA;Motif:rnd-1.418	768	1
														SVE_0217800	hypothetical protein BOX15_Mlig032217g1		SVE_0074100	---NA---		tRNA;Motif:rnd-1.430	1262	2
														SVE_0292100	NADAR family protein		SVE_0092400	Reverse transcriptase domain and Aspartic peptidase domain-containing protein		tRNA;Motif:rnd-1.431	1338	1
														SVE_0595700	---NA---		SVE_0113700	---NA---		tRNA;Motif:rnd-1.437	134	2
														SVE_0615200	Integrase, catalytic core domain and Ribonuclease H-like domain-containing protein		SVE_0114500	Zinc finger, CCHC-type domain and Aspartic peptidase domain-containing protein		tRNA;Motif:rnd-1.438	937	1
														SVE_0626100	Reverse transcriptase domain and Integrase,catalytic core domain and Ribonuclease H domain and Ribonuclease H-like domain-containing protein		SVE_0166100	---NA---		tRNA;Motif:rnd-1.44	1049	2
														SVE_0666900	Reverse transcriptase domain-containing protein		SVE_0166500	---NA---		tRNA;Motif:rnd-1.441	1028	2
														SVE_0733300	Reverse transcriptase domain and Integrase, catalytic core domain and Zinc finger, CCHC-type domain and Ribonuclease H-like domain-containing protein		SVE_0166700	DNA helicase Pif1 like family and P-loop containing nucleoside triphosphate hydrolase domain-containing protein		tRNA;Motif:rnd-1.444	1051	3
														SVE_0769900	---NA---		SVE_0217800	hypothetical protein BOX15_Mlig032217g1		tRNA;Motif:rnd-1.449	1850	1
														SVE_0770800	---NA---		SVE_0228700	---NA---		tRNA;Motif:rnd-1.450	1116	3
														SVE_0775500	Integrase, catalytic core domain and Ribonuclease H-like domain-containing protein		SVE_0292100	NADAR family protein		tRNA;Motif:rnd-1.451	568	2
														SVE_1062800	Reverse transcriptase domain and Integrase, catalytic core domain and Ribonuclease H-like domain and Peptidase A2A, retrovirus RVP subgroup domain and Aspartic peptidase domain-containing protein		SVE_0323900	---NA---		tRNA;Motif:rnd-1.454	981	1
														SVE_1106300	---NA---		SVE_0595700	---NA---		tRNA;Motif:rnd-1.456	1241	1
														SVE_1155100	Retrovirus polyprotein		SVE_0615200	Integrase, catalytic core domain and Ribonuclease H-like domain-containing protein		tRNA;Motif:rnd-1.48	1862	6
														SVE_1220100	retrotransposon protein, putative, Ty3-gypsy subclass		SVE_0626100	Reverse transcriptase domain and Integrase,catalytic core domain and Ribonuclease H domain and Ribonuclease H-like domain-containing protein		tRNA;Motif:rnd-1.485	1446	1
														SVE_1267100	---NA---		SVE_0666900	Reverse transcriptase domain-containing protein		tRNA;Motif:rnd-1.505	1559	2
														SVE_1302900	predicted protein		SVE_0733300	Reverse transcriptase domain and Integrase, catalytic core domain and Zinc finger, CCHC-type domain and Ribonuclease H-like domain-containing protein		tRNA;Motif:rnd-1.508	1814	8
														SVE_1335600	---NA---		SVE_0769900	---NA---		tRNA;Motif:rnd-1.510	147	1
														SVE_1402300	Reverse transcriptase domain and Integrase,catalytic core domain and Ribonuclease H-like domain and AT hook-like family and Aspartic peptidase domain-containing protein		SVE_0770800	---NA---		tRNA;Motif:rnd-1.511	1229	1
														SVE_1431500	retrovirus polyprotein, putative		SVE_0775500	Integrase, catalytic core domain and Ribonuclease H-like domain-containing protein		tRNA;Motif:rnd-1.514	523	1
														SVE_1473700	Hypothetical predicted protein		SVE_1062800	Reverse transcriptase domain and Integrase, catalytic core domain and Ribonuclease H-like domain and Peptidase A2A, retrovirus RVP subgroup domain and Aspartic peptidase domain-containing protein		tRNA;Motif:rnd-1.516	120	2
														SVE_1517900	Reverse transcriptase domain-containing protein		SVE_1106300	---NA---		tRNA;Motif:rnd-1.518	1051	6
														SVE_1777500	---NA---		SVE_1155100	Retrovirus polyprotein		tRNA;Motif:rnd-1.519	94	1
														SVE_1919200	---NA---		SVE_1220100	retrotransposon protein, putative, Ty3-gypsy subclass		tRNA;Motif:rnd-1.531	209	1
														SVE_1963000	---NA---		SVE_1267100	---NA---		tRNA;Motif:rnd-1.532	97	1
														SVE_1990900	---NA---		SVE_1302900	predicted protein		tRNA;Motif:rnd-1.54	98	1
														SVE_2001200	---NA---		SVE_1335600	---NA---		tRNA;Motif:rnd-1.557	1636	2
														SVE_2017400	---NA---		SVE_1402300	Reverse transcriptase domain and Integrase,catalytic core domain and Ribonuclease H-like domain and AT hook-like family and Aspartic peptidase domain-containing protein		tRNA;Motif:rnd-1.565	1258	4
														SVE_2029300	---NA---		SVE_1431500	retrovirus polyprotein, putative		tRNA;Motif:rnd-1.566	1721	2
														SVE_0032200	---NA---		SVE_1473700	Hypothetical predicted protein		tRNA;Motif:rnd-1.57	776	1
														SVE_0093800	---NA---		SVE_1517900	Reverse transcriptase domain-containing protein		tRNA;Motif:rnd-1.571	1450	1
														SVE_0356400	hypothetical protein CAEBREN_29891		SVE_1535700	Reverse transcriptase domain and Integrase,catalytic core domain and Ribonuclease H-like domain and AT hook-like family and Aspartic peptidase domain-containing protein		tRNA;Motif:rnd-1.576	1333	1
														SVE_0391600	Reverse transcriptase domain and Integrase,catalytic core domain and Ribonuclease H-like domain and AT hook-like family and Aspartic peptidase domain-containing protein		SVE_1777500	---NA---		tRNA;Motif:rnd-1.588	1881	7
														SVE_0596800	---NA---		SVE_1919200	---NA---		tRNA;Motif:rnd-1.606	80	2
														SVE_0613600	---NA---		SVE_1963000	---NA---		tRNA;Motif:rnd-1.620	88	1
														SVE_0686400	---NA---		SVE_1990900	---NA---		tRNA;Motif:rnd-1.623	1198	1
														SVE_0849300	---NA---		SVE_2001200	---NA---		tRNA;Motif:rnd-1.627	366	1
														SVE_1126500	---NA---		SVE_2017400	---NA---		tRNA;Motif:rnd-1.638	1885	2
														SVE_1155300	hypothetical protein AVEN_16537_1		SVE_2029300	---NA---		tRNA;Motif:rnd-1.64	1146	3
														SVE_1402200	Reverse transcriptase domain and Integrase,catalytic core domain and Ribonuclease H-like domain and AT hook-like family and Aspartic peptidase domain-containing protein		SVE_1316700	---NA---		tRNA;Motif:rnd-1.645	93	1
														SVE_1418200	---NA---		SVE_0019000	---NA---		tRNA;Motif:rnd-1.65	1723	2
														SVE_1438300	---NA---		SVE_0032200	---NA---		tRNA;Motif:rnd-1.655	1254	2
														SVE_1481700	Reverse transcriptase domain and Integrase,catalytic core domain and Ribonuclease H-like domain and AT hook-like family and Aspartic peptidase domain-containing protein		SVE_0037500	Poly(U)-specific endoribonuclease		tRNA;Motif:rnd-1.656	1718	1
														SVE_1666600	---NA---		SVE_0050400	Reverse transcriptase domain and Integrase,catalytic core domain and Ribonuclease H domain and Ribonuclease H-like domain-containing protein		tRNA;Motif:rnd-1.661	1065	2
														SVE_1775900	reverse transcriptase		SVE_0072700	Hypothetical protein SRAE_1000014600		tRNA;Motif:rnd-1.662	1257	1
														SVE_1920400	---NA---		SVE_0093800	---NA---		tRNA;Motif:rnd-1.663	79	2
														SVE_1959900	Reverse transcriptase domain and Integrase,catalytic core domain and Zinc finger, CCHC-type domain and Ribonuclease H-like domain and Aspartic peptidase domain-containing protein		SVE_0288000	Phosphate transporter family-containing protein		tRNA;Motif:rnd-1.673	81	1
														SVE_0165800	---NA---		SVE_0291800	---NA---		tRNA;Motif:rnd-1.680	1564	1
														SVE_0166300	---NA---		SVE_0356400	hypothetical protein CAEBREN_29891		tRNA;Motif:rnd-1.683	674	1
														SVE_0613300	---NA---		SVE_0391600	Reverse transcriptase domain and Integrase,catalytic core domain and Ribonuclease H-like domain and AT hook-like family and Aspartic peptidase domain-containing protein		tRNA;Motif:rnd-1.687	1230	1
														SVE_0626200	ribonuclease HI		SVE_0392400	Transposase, ISXO2-like domain-containing protein		tRNA;Motif:rnd-1.711	1051	4
														SVE_0650900	putative RNA-directed DNA polymerase		SVE_0566400	Protein lunapark		tRNA;Motif:rnd-1.716	1240	2
														SVE_0775600	---NA---		SVE_0595500	---NA---		tRNA;Motif:rnd-1.718	570	1
														SVE_1107900	---NA---		SVE_0596000	---NA---		tRNA;Motif:rnd-1.721	1014	1
														SVE_1137500	Reverse transcriptase domain and Integrase,catalytic core domain and Ribonuclease H-like domain and AT hook-like family and Aspartic peptidase domain-containing protein		SVE_0596600	---NA---		tRNA;Motif:rnd-1.725	712	3
														SVE_1252400	---NA---		SVE_0596800	---NA---		tRNA;Motif:rnd-1.726	712	1
														SVE_1463800	---NA---		SVE_0597200	---NA---		tRNA;Motif:rnd-1.730	725	1
														SVE_1888600	Integrase, catalytic core domain and Ribonuclease H-like domain-containing protein		SVE_0604300	---NA---		tRNA;Motif:rnd-1.735	1904	2
														SVE_1920200	---NA---		SVE_0610600	---NA---		tRNA;Motif:rnd-1.749	733	1
														SVE_0680600	---NA---		SVE_0610900	Zinc finger, CCHC-type domain-containing protein		tRNA;Motif:rnd-1.752	889	1
														SVE_0614800	---NA---		SVE_0613600	---NA---		tRNA;Motif:rnd-1.754	287	1
														SVE_0032300	Reverse transcriptase domain and Integrase, catalytic core domain and Ribonuclease H-like domain and Aspartic peptidase domain-containing protein		SVE_0613700	---NA---		tRNA;Motif:rnd-1.760	930	4
														SVE_0060800	Hypothetical protein SRAE_X000231900		SVE_0650800	---NA---		tRNA;Motif:rnd-1.761	94	1
														SVE_0092600	integrase core domain protein		SVE_0666600	---NA---		tRNA;Motif:rnd-1.762	812	1
														SVE_0113600	Hypothetical protein SRAE_X000025200		SVE_0686100	ALK tyrosine kinase receptor		tRNA;Motif:rnd-1.767	1561	3
														SVE_0166000	---NA---		SVE_0686400	---NA---		tRNA;Motif:rnd-1.770	1341	4
														SVE_0201700	---NA---		SVE_0686900	---NA---		tRNA;Motif:rnd-1.774	403	1
														SVE_0368400	---NA---		SVE_0721700	---NA---		tRNA;Motif:rnd-1.780	89	1
														SVE_0609300	Hypothetical protein SRAE_X000234600		SVE_0722500	---NA---		tRNA;Motif:rnd-1.784	1312	2
														SVE_0613400	---NA---		SVE_0725600	---NA---		tRNA;Motif:rnd-1.797	1721	2
														SVE_0633500	nucleosomal histone kinase 1-like		SVE_0740900	---NA---		tRNA;Motif:rnd-1.798	1897	10
														SVE_0666300	Reverse transcriptase domain-containing protein		SVE_0743400	---NA---		tRNA;Motif:rnd-1.805	80	1
														SVE_0667600	ribonuclease HI		SVE_0761300	---NA---		tRNA;Motif:rnd-1.814	1415	1
														SVE_0677800	Reverse transcriptase domain and Integrase,catalytic core domain and Ribonuclease H domain and Ribonuclease H-like domain-containing protein		SVE_0763100	---NA---		tRNA;Motif:rnd-1.83	633	4
														SVE_0677900	---NA---		SVE_0801000	unnamed protein product		tRNA;Motif:rnd-1.830	398	1
														SVE_0715900	Reverse transcriptase domain and Integrase,catalytic core domain and Ribonuclease H domain and Ribonuclease H-like domain-containing protein		SVE_0813000	---NA---		tRNA;Motif:rnd-1.832	1119	1
														SVE_0770400	uncharacterized protein K02A2.6-like		SVE_0829900	hypothetical protein CAEBREN_15395		tRNA;Motif:rnd-1.837	1306	6
														SVE_0770900	dynein heavy chain		SVE_0849300	---NA---		tRNA;Motif:rnd-1.839	859	1
														SVE_0779800	---NA---		SVE_0850900	---NA---		tRNA;Motif:rnd-1.92	396	2
														SVE_0811500	---NA---		SVE_0915200	---NA---		tRNA;Motif:rnd-1.93	1718	1
														SVE_0813500	Reverse transcriptase domain and Integrase,catalytic core domain and Ribonuclease H-like domain and AT hook-like family and Aspartic peptidase domain-containing protein		SVE_0915500	---NA---		tRNA;Motif:rnd-1.94	1253	2
														SVE_0832000	Transposon Tf2-6 polyprotein		SVE_1027000	Nucleoside diphosphate-linked moiety X motif 6		tRNA;Motif:rnd-1.98	340	1
														SVE_0844000	Reverse transcriptase domain and Integrase,catalytic core domain and Ribonuclease H-like domain and AT hook-like family and Aspartic peptidase domain-containing protein		SVE_1119900	Lipid-binding serum glycoprotein, C-terminal domain and Lipid-binding serum glycoprotein, N-terminal domain and Bactericidal permeability-increasing protein, alpha/beta domain-containing protein		Unknown;Motif:rnd-1.10011	956	1
														SVE_0849400	hypothetical protein BSL78_12256		SVE_1126500	---NA---		Unknown;Motif:rnd-1.10063	219	1
														SVE_0851300	Reverse transcriptase domain and Integrase, catalytic core domain and Ribonuclease H-like domain and Aspartic peptidase domain-containing protein		SVE_1155300	hypothetical protein AVEN_16537_1		Unknown;Motif:rnd-1.10328	646	2
														SVE_0851500	Reverse transcriptase domain-containing protein		SVE_1165000	Peroxisomal sarcosine oxidase		Unknown;Motif:rnd-1.10329	722	1
														SVE_1063300	Reverse transcriptase domain and Integrase, catalytic core domain and Ribonuclease H-like domain and Peptidase A2A, retrovirus RVP subgroup domain and Aspartic peptidase domain-containing protein		SVE_1166200	---NA---		Unknown;Motif:rnd-1.10337	634	1
														SVE_1118300	Abnormal spindle-like microcephaly-associated protein		SVE_1245700	DSH, C-terminal domain and P-loop containing nucleoside triphosphate hydrolase domain-containing protein		Unknown;Motif:rnd-1.10460	228	3
														SVE_1124800	---NA---		SVE_1246700	---NA---		Unknown;Motif:rnd-1.10512	115	1
														SVE_1218100	Reverse transcriptase domain and Integrase,catalytic core domain and Ribonuclease H-like domain and AT hook-like family and Aspartic peptidase domain-containing protein		SVE_1266100	uncharacterized mitochondrial protein AtMg00860-like		Unknown;Motif:rnd-1.10541	1171	1
														SVE_1222300	Reverse transcriptase domain-containing protein		SVE_1307700	---NA---		Unknown;Motif:rnd-1.10561	380	1
														SVE_1222500	Hypothetical protein SRAE_X000232000		SVE_1318000	---NA---		Unknown;Motif:rnd-1.10604	1845	2
														SVE_1222600	Hypothetical protein SRAE_X000231800		SVE_1318700	---NA---		Unknown;Motif:rnd-1.10606	801	1
														SVE_1222800	---NA---		SVE_1330500	---NA---		Unknown;Motif:rnd-1.10649	808	1
														SVE_1246300	NADAR family protein		SVE_1402200	Reverse transcriptase domain and Integrase,catalytic core domain and Ribonuclease H-like domain and AT hook-like family and Aspartic peptidase domain-containing protein		Unknown;Motif:rnd-1.10650	126	1
														SVE_1251900	Reverse transcriptase domain and Integrase,catalytic core domain and Ribonuclease H-like domain and Aspartic peptidase domain-containing protein		SVE_1418200	---NA---		Unknown;Motif:rnd-1.10659	750	3
														SVE_1266400	Reverse transcriptase domain and Aspartic peptidase domain-containing protein		SVE_1438300	---NA---		Unknown;Motif:rnd-1.10664	711	1
														SVE_1276000	Reverse transcriptase domain and Integrase, catalytic core domain and Ribonuclease H-like domain and Aspartic peptidase domain-containing protein		SVE_1481700	Reverse transcriptase domain and Integrase,catalytic core domain and Ribonuclease H-like domain and AT hook-like family and Aspartic peptidase domain-containing protein		Unknown;Motif:rnd-1.10667	848	12
														SVE_1278500	Reverse transcriptase domain and Integrase,catalytic core domain and Ribonuclease H domain and Ribonuclease H-like domain-containing protein		SVE_1494800	Hypothetical protein SRAE_0000050800		Unknown;Motif:rnd-1.10779	1077	1
														SVE_1306300	Histone-lysine N-methyltransferase SETMAR		SVE_1635900	Hypothetical protein SRAE_2000487400		Unknown;Motif:rnd-1.10783	739	4
														SVE_1316600	unnamed protein product		SVE_1666600	---NA---		Unknown;Motif:rnd-1.10784	902	3
														SVE_1316800	Reverse transcriptase domain-containing protein		SVE_1696400	---NA---		Unknown;Motif:rnd-1.10814	317	1
														SVE_1317600	Reverse transcriptase domain-containing protein		SVE_1709800	Reverse transcriptase domain and Integrase,catalytic core domain and Ribonuclease H-like domain-containing protein		Unknown;Motif:rnd-1.11051	614	2
														SVE_1387600	Reverse transcriptase domain and Integrase,catalytic core domain and Ribonuclease H-like domain and AT hook-like family and Aspartic peptidase domain-containing protein		SVE_1763800	Hypothetical protein SRAE_2000363400		Unknown;Motif:rnd-1.11066	720	1
														SVE_1387700	---NA---		SVE_1775900	reverse transcriptase		Unknown;Motif:rnd-1.11231	458	1
														SVE_1418300	---NA---		SVE_1778700	---NA---		Unknown;Motif:rnd-1.11358	421	1
														SVE_1470300	Ovarian tumour, otubain domain and DNA helicase Pif1 like family and Helitron helicase-like domain and P-loop containing nucleoside triphosphate hydrolase domain-containing protein		SVE_1793200	Reverse transcriptase domain-containing protein		Unknown;Motif:rnd-1.11395	266	1
														SVE_1474100	---NA---		SVE_1851200	---NA---		Unknown;Motif:rnd-1.11396	227	5
														SVE_1481400	hypothetical protein BAUCODRAFT_56811, partial		SVE_1859000	---NA---		Unknown;Motif:rnd-1.11397	233	1
														SVE_1481500	hypothetical protein D4764_15G0008870		SVE_1920400	---NA---		Unknown;Motif:rnd-1.11398	223	2
														SVE_1535800	Reverse transcriptase domain and Integrase,catalytic core domain and Ribonuclease H-like domain and AT hook-like family and Aspartic peptidase domain-containing protein		SVE_1921200	---NA---		Unknown;Motif:rnd-1.11400	395	1
														SVE_1661200	Integrase, catalytic core domain and Ribonuclease H-like domain-containing protein		SVE_1959900	Reverse transcriptase domain and Integrase,catalytic core domain and Zinc finger, CCHC-type domain and Ribonuclease H-like domain and Aspartic peptidase domain-containing protein		Unknown;Motif:rnd-1.11403	230	2
														SVE_1661300	Reverse transcriptase domain and Integrase, catalytic core domain and Zinc finger, CCHC-type domain and Ribonuclease H-like domain and Aspartic peptidase domain-containing protein		SVE_1964200	Integrase, catalytic core domain and Ribonuclease H-like domain-containing protein		Unknown;Motif:rnd-1.11404	498	1
														SVE_1775700	Reverse transcriptase domain-containing protein		SVE_2001600	PREDICTED: uncharacterized protein LOC108359141		Unknown;Motif:rnd-1.11414	287	1
														SVE_1781300	reverse transcriptase		SVE_2013300	---NA---		Unknown;Motif:rnd-1.11483	384	2
														SVE_1851300	---NA---		SVE_2019400	---NA---		Unknown;Motif:rnd-1.11491	1003	1
														SVE_1851500	putative LTR retrotransposon		SVE_2023300	---NA---		Unknown;Motif:rnd-1.11530	339	1
														SVE_1912300	---NA---		SVE_0165800	---NA---		Unknown;Motif:rnd-1.11531	752	2
														SVE_1918200	---NA---		SVE_0166300	---NA---		Unknown;Motif:rnd-1.11532	274	1
														SVE_1918400	DSH, C-terminal domain and P-loop containing nucleoside triphosphate hydrolase domain-containing protein		SVE_0175700	Glycoprotein-N-acetylgalactosamine 3-beta-galactosyltransferase 1		Unknown;Motif:rnd-1.11534	184	1
														SVE_1918800	Hypothetical protein SRAE_X000231900		SVE_0613300	---NA---		Unknown;Motif:rnd-1.11563	761	1
														SVE_1919700	---NA---		SVE_0626200	ribonuclease HI		Unknown;Motif:rnd-1.11654	563	1
														SVE_1919800	P-loop containing nucleoside triphosphate hydrolase protein		SVE_0650900	putative RNA-directed DNA polymerase		Unknown;Motif:rnd-1.11656	748	1
														SVE_1929100	Reverse transcriptase domain and Integrase, catalytic core domain and Zinc finger, CCHC-type domain and Peptidase A2A, retrovirus, catalytic domain and Ribonuclease H-like domain and Peptidase A2A, retrovirus RVP subgroup domain and Aspartic peptidase domain-containing protein		SVE_0775600	---NA---		Unknown;Motif:rnd-1.11659	748	1
														SVE_1963300	---NA---		SVE_1107900	---NA---		Unknown;Motif:rnd-1.11660	912	2
														SVE_2013400	---NA---		SVE_1137500	Reverse transcriptase domain and Integrase,catalytic core domain and Ribonuclease H-like domain and AT hook-like family and Aspartic peptidase domain-containing protein		Unknown;Motif:rnd-1.11716	257	1
														SVE_2016100	---NA---		SVE_1252400	---NA---		Unknown;Motif:rnd-1.11717	341	1
														SVE_2018800	putative transposable element		SVE_1463800	---NA---		Unknown;Motif:rnd-1.11718	283	2
														SVE_0276900	Integrase, catalytic core domain and Ribonuclease H-like domain-containing protein		SVE_1888600	Integrase, catalytic core domain and Ribonuclease H-like domain-containing protein		Unknown;Motif:rnd-1.11719	127	2
														SVE_0610700	---NA---		SVE_1920200	---NA---		Unknown;Motif:rnd-1.11743	728	1
														SVE_0685900	Reverse transcriptase domain and Integrase, catalytic core domain and Zinc finger, CCHC-type domain and Ribonuclease H-like domain and Aspartic peptidase domain-containing protein		SVE_0680600	---NA---		Unknown;Motif:rnd-1.11752	423	1
														SVE_0797400	Astacin-like metalloendopeptidase		SVE_1402700	hypothetical protein RF11_15134		Unknown;Motif:rnd-1.11792	57	1
														SVE_1152900	unnamed protein product		SVE_0045700	Reverse transcriptase domain and Integrase,catalytic core domain and Zinc finger, CCHC-type domain and Ribonuclease H-like domain and Aspartic peptidase domain-containing protein		Unknown;Motif:rnd-1.11834	542	1
														SVE_1246400	---NA---		SVE_0614800	---NA---		Unknown;Motif:rnd-1.1189	933	1
														SVE_1248300	Transposon Tf2-6 polyprotein		SVE_1492200	hypothetical protein ANCCAN_28779		Unknown;Motif:rnd-1.11900	292	1
														SVE_1266200	Pro-Pol polyprotein		SVE_1687000	ATP-dependent DNA helicase PIF1		Unknown;Motif:rnd-1.12031	161	1
														SVE_1266700	Reverse transcriptase domain and Integrase, catalytic core domain and Zinc finger, CCHC-type domain and Ribonuclease H-like domain-containing protein		SVE_2021300	Reverse transcriptase domain-containing protein		Unknown;Motif:rnd-1.12048	143	2
														SVE_1306000	---NA---		SVE_0032300	Reverse transcriptase domain and Integrase, catalytic core domain and Ribonuclease H-like domain and Aspartic peptidase domain-containing protein		Unknown;Motif:rnd-1.12049	456	2
														SVE_1331000	---NA---		SVE_0060800	Hypothetical protein SRAE_X000231900		Unknown;Motif:rnd-1.12050	620	2
														SVE_1439300	Reverse transcriptase domain-containing protein		SVE_0092600	integrase core domain protein		Unknown;Motif:rnd-1.12052	438	2
														SVE_1490000	Reverse transcriptase domain and Integrase,catalytic core domain and Ribonuclease H-like domain and Aspartic peptidase domain-containing protein		SVE_0113600	Hypothetical protein SRAE_X000025200		Unknown;Motif:rnd-1.12053	415	2
														SVE_1494900	---NA---		SVE_0166000	---NA---		Unknown;Motif:rnd-1.12054	456	4
														SVE_2028000	---NA---		SVE_0201700	---NA---		Unknown;Motif:rnd-1.12055	481	1
														SVE_0217900	uncharacterized protein K02A2.6-like		SVE_0368400	---NA---		Unknown;Motif:rnd-1.12095	532	2
														SVE_0293100	---NA---		SVE_0609300	Hypothetical protein SRAE_X000234600		Unknown;Motif:rnd-1.12096	750	2
														SVE_0733200	Reverse transcriptase domain and Zinc finger, CCHC-type domain-containing protein		SVE_0613400	---NA---		Unknown;Motif:rnd-1.12100	407	1
														SVE_0763000	Reverse transcriptase domain and Integrase, catalytic core domain and Zinc finger, CCHC-type domain and Ribonuclease H-like domain and Aspartic peptidase domain-containing protein		SVE_0633500	nucleosomal histone kinase 1-like		Unknown;Motif:rnd-1.12106	243	1
														SVE_1062900	Integrase, catalytic core domain and Ribonuclease H-like domain-containing protein		SVE_0666300	Reverse transcriptase domain-containing protein		Unknown;Motif:rnd-1.12116	1258	1
														SVE_1162700	---NA---		SVE_0667600	ribonuclease HI		Unknown;Motif:rnd-1.12118	634	1
														SVE_1165300	Reverse transcriptase domain and Integrase,catalytic core domain and Ribonuclease H-like domain-containing protein		SVE_0677800	Reverse transcriptase domain and Integrase,catalytic core domain and Ribonuclease H domain and Ribonuclease H-like domain-containing protein		Unknown;Motif:rnd-1.12121	241	1
														SVE_1252300	NC domain containing protein		SVE_0677900	---NA---		Unknown;Motif:rnd-1.12141	217	1
														SVE_1330300	Transposon Ty3-G Gag-Pol polyprotein		SVE_0715900	Reverse transcriptase domain and Integrase,catalytic core domain and Ribonuclease H domain and Ribonuclease H-like domain-containing protein		Unknown;Motif:rnd-1.12200	648	1
														SVE_1387800	---NA---		SVE_0770400	uncharacterized protein K02A2.6-like		Unknown;Motif:rnd-1.12201	1676	1
														SVE_1777900	Reverse transcriptase domain and Integrase,catalytic core domain and Ribonuclease H-like domain and Aspartic peptidase domain-containing protein		SVE_0770900	dynein heavy chain		Unknown;Motif:rnd-1.12206	1278	1
														SVE_1779700	Reverse transcriptase domain and Integrase,catalytic core domain and Ribonuclease H-like domain and AT hook-like family and Aspartic peptidase domain-containing protein		SVE_0779800	---NA---		Unknown;Motif:rnd-1.12213	1101	1
														SVE_1851400	Aspartic peptidase domain-containing protein		SVE_0811500	---NA---		Unknown;Motif:rnd-1.12284	425	1
														SVE_2010100	Hypothetical protein SRAE_X000232400		SVE_0813500	Reverse transcriptase domain and Integrase,catalytic core domain and Ribonuclease H-like domain and AT hook-like family and Aspartic peptidase domain-containing protein		Unknown;Motif:rnd-1.12333	271	1
														SVE_0175100	---NA---		SVE_0832000	Transposon Tf2-6 polyprotein		Unknown;Motif:rnd-1.12381	1118	1
														SVE_0651000	uncharacterized mitochondrial protein AtMg00810-like		SVE_0844000	Reverse transcriptase domain and Integrase,catalytic core domain and Ribonuclease H-like domain and AT hook-like family and Aspartic peptidase domain-containing protein		Unknown;Motif:rnd-1.12400	221	2
														SVE_0859800	---NA---		SVE_0849400	hypothetical protein BSL78_12256		Unknown;Motif:rnd-1.12402	2146	16
														SVE_0893800	Copia protein		SVE_0851300	Reverse transcriptase domain and Integrase, catalytic core domain and Ribonuclease H-like domain and Aspartic peptidase domain-containing protein		Unknown;Motif:rnd-1.12403	530	4
														SVE_1266600	Reverse transcriptase domain and Integrase, catalytic core domain and Zinc finger, CCHC-type domain and Ribonuclease H-like domain-containing protein		SVE_0851500	Reverse transcriptase domain-containing protein		Unknown;Motif:rnd-1.1242	361	1
														SVE_1277800	---NA---		SVE_1063300	Reverse transcriptase domain and Integrase, catalytic core domain and Ribonuclease H-like domain and Peptidase A2A, retrovirus RVP subgroup domain and Aspartic peptidase domain-containing protein		Unknown;Motif:rnd-1.1243	630	2
														SVE_1418100	---NA---		SVE_1101600	Hypothetical protein SRAE_0000050600		Unknown;Motif:rnd-1.12441	1847	1
														SVE_1439400	Reverse transcriptase domain-containing protein		SVE_1118300	Abnormal spindle-like microcephaly-associated protein		Unknown;Motif:rnd-1.12448	2135	1
														SVE_1948400	---NA---		SVE_1124800	---NA---		Unknown;Motif:rnd-1.12494	480	1
														SVE_2005800	---NA---		SVE_1186300	---NA---		Unknown;Motif:rnd-1.12572	550	1
														SVE_0092300	Zinc finger, CCHC-type domain-containing protein		SVE_1218100	Reverse transcriptase domain and Integrase,catalytic core domain and Ribonuclease H-like domain and AT hook-like family and Aspartic peptidase domain-containing protein		Unknown;Motif:rnd-1.12601	575	2
														SVE_0092500	Reverse transcriptase domain and Aspartic peptidase domain-containing protein		SVE_1222300	Reverse transcriptase domain-containing protein		Unknown;Motif:rnd-1.12602	688	1
														SVE_0094000	PREDICTED: uncharacterized protein K02A2.6-like, partial		SVE_1222500	Hypothetical protein SRAE_X000232000		Unknown;Motif:rnd-1.12603	690	2
														SVE_0113500	---NA---		SVE_1222600	Hypothetical protein SRAE_X000231800		Unknown;Motif:rnd-1.12605	479	2
														SVE_0114000	---NA---		SVE_1222800	---NA---		Unknown;Motif:rnd-1.12610	501	1
														SVE_0166400	---NA---		SVE_1246300	NADAR family protein		Unknown;Motif:rnd-1.12669	263	2
														SVE_0263900	Reverse transcriptase domain and Integrase, catalytic core domain and Zinc finger, CCHC-type domain and Ribonuclease H-like domain and Aspartic peptidase domain-containing protein		SVE_1251900	Reverse transcriptase domain and Integrase,catalytic core domain and Ribonuclease H-like domain and Aspartic peptidase domain-containing protein		Unknown;Motif:rnd-1.12672	976	1
														SVE_0271600	Hypothetical protein SRAE_X000232000		SVE_1266400	Reverse transcriptase domain and Aspartic peptidase domain-containing protein		Unknown;Motif:rnd-1.12693	1557	1
														SVE_0271700	Hypothetical protein SRAE_X000231900		SVE_1276000	Reverse transcriptase domain and Integrase, catalytic core domain and Ribonuclease H-like domain and Aspartic peptidase domain-containing protein		Unknown;Motif:rnd-1.12730	539	1
														SVE_0288300	ribonuclease H-like domain-containing protein		SVE_1278500	Reverse transcriptase domain and Integrase,catalytic core domain and Ribonuclease H domain and Ribonuclease H-like domain-containing protein		Unknown;Motif:rnd-1.12734	749	4
														SVE_0291700	---NA---		SVE_1306300	Histone-lysine N-methyltransferase SETMAR		Unknown;Motif:rnd-1.12736	708	1
														SVE_0292200	Hypothetical protein SRAE_0000049200		SVE_1316600	unnamed protein product		Unknown;Motif:rnd-1.12771	749	3
														SVE_0293400	Reverse transcriptase domain and Integrase,catalytic core domain and Ribonuclease H-like domain and AT hook-like family and Aspartic peptidase domain-containing protein		SVE_1316800	Reverse transcriptase domain-containing protein		Unknown;Motif:rnd-1.12772	391	1
														SVE_0368600	---NA---		SVE_1317600	Reverse transcriptase domain-containing protein		Unknown;Motif:rnd-1.12774	709	1
														SVE_0594700	---NA---		SVE_1387600	Reverse transcriptase domain and Integrase,catalytic core domain and Ribonuclease H-like domain and AT hook-like family and Aspartic peptidase domain-containing protein		Unknown;Motif:rnd-1.12775	695	3
														SVE_0603500	Reverse transcriptase domain and Integrase, catalytic core domain and Ribonuclease H-like domain-containing protein		SVE_1387700	---NA---		Unknown;Motif:rnd-1.12777	708	1
														SVE_0607700	Helitron helicase-like domain-containing protein		SVE_1418300	---NA---		Unknown;Motif:rnd-1.12779	1028	1
														SVE_0607900	---NA---		SVE_1470300	Ovarian tumour, otubain domain and DNA helicase Pif1 like family and Helitron helicase-like domain and P-loop containing nucleoside triphosphate hydrolase domain-containing protein		Unknown;Motif:rnd-1.12781	161	1
														SVE_0610300	Hypothetical protein SRAE_0000047600		SVE_1474100	---NA---		Unknown;Motif:rnd-1.12790	705	2
														SVE_0610400	Hypothetical protein SRAE_0000064800		SVE_1481400	hypothetical protein BAUCODRAFT_56811, partial		Unknown;Motif:rnd-1.12791	622	1
														SVE_0612900	ATP-dependent RNA helicase A-like		SVE_1481500	hypothetical protein D4764_15G0008870		Unknown;Motif:rnd-1.12793	831	4
														SVE_0613200	Helicase, C-terminal domain and P-loop containing nucleoside triphosphate hydrolase domain-containing protein		SVE_1535800	Reverse transcriptase domain and Integrase,catalytic core domain and Ribonuclease H-like domain and AT hook-like family and Aspartic peptidase domain-containing protein		Unknown;Motif:rnd-1.12812	115	1
														SVE_0614900	---NA---		SVE_1661200	Integrase, catalytic core domain and Ribonuclease H-like domain-containing protein		Unknown;Motif:rnd-1.12840	451	1
														SVE_0630800	Reverse transcriptase domain and Integrase, catalytic core domain and Ribonuclease H-like domain and Peptidase A2A, retrovirus RVP subgroup domain and AT hook-like family and Aspartic peptidase domain-containing protein		SVE_1661300	Reverse transcriptase domain and Integrase, catalytic core domain and Zinc finger, CCHC-type domain and Ribonuclease H-like domain and Aspartic peptidase domain-containing protein		Unknown;Motif:rnd-1.12843	451	1
														SVE_0633900	Hypothetical protein SRAE_0000065600		SVE_1775700	Reverse transcriptase domain-containing protein		Unknown;Motif:rnd-1.1293	585	1
														SVE_0650300	retrovirus-related Pol polyprotein from transposon TNT 1-94		SVE_1781300	reverse transcriptase		Unknown;Motif:rnd-1.12948	536	4
														SVE_0666500	Reverse transcriptase domain and Integrase,catalytic core domain and Ribonuclease H-like domain and AT hook-like family and Aspartic peptidase domain-containing protein		SVE_1851300	---NA---		Unknown;Motif:rnd-1.12949	127	1
														SVE_0681200	Hypothetical protein SRAE_1000022100		SVE_1851500	putative LTR retrotransposon		Unknown;Motif:rnd-1.1295	1154	1
														SVE_0723300	---NA---		SVE_1912300	---NA---		Unknown;Motif:rnd-1.12996	641	1
														SVE_0724000	Reverse transcriptase domain and Integrase,catalytic core domain and Ribonuclease H-like domain and AT hook-like family and Aspartic peptidase domain-containing protein		SVE_1918200	---NA---		Unknown;Motif:rnd-1.12997	697	1
														SVE_0725000	Reverse transcriptase domain and Integrase,catalytic core domain and Ribonuclease H domain and Ribonuclease H-like domain-containing protein		SVE_1918400	DSH, C-terminal domain and P-loop containing nucleoside triphosphate hydrolase domain-containing protein		Unknown;Motif:rnd-1.13075	200	1
														SVE_0727400	Astacin-like metalloendopeptidase		SVE_1918800	Hypothetical protein SRAE_X000231900		Unknown;Motif:rnd-1.13160	1377	1
														SVE_0759200	---NA---		SVE_1919700	---NA---		Unknown;Motif:rnd-1.13215	185	1
														SVE_0759700	Reverse transcriptase domain and Integrase,catalytic core domain and Ribonuclease H-like domain and Aspartic peptidase domain-containing protein		SVE_1919800	P-loop containing nucleoside triphosphate hydrolase protein		Unknown;Motif:rnd-1.13298	217	1
														SVE_0765000	---NA---		SVE_1929100	Reverse transcriptase domain and Integrase, catalytic core domain and Zinc finger, CCHC-type domain and Peptidase A2A, retrovirus, catalytic domain and Ribonuclease H-like domain and Peptidase A2A, retrovirus RVP subgroup domain and Aspartic peptidase domain-containing protein		Unknown;Motif:rnd-1.13365	954	2
														SVE_0770500	Reverse transcriptase domain-containing protein		SVE_1963300	---NA---		Unknown;Motif:rnd-1.13383	231	5
														SVE_0775400	Transposon Ty3-I Gag-Pol polyprotein		SVE_2013400	---NA---		Unknown;Motif:rnd-1.1401	747	2
														SVE_0799700	ATP-dependent RNA helicase, putative		SVE_2016100	---NA---		Unknown;Motif:rnd-1.1404	755	4
														SVE_0801200	uncharacterized protein LOC111105213		SVE_2018800	putative transposable element		Unknown;Motif:rnd-1.1405	751	2
														SVE_0801600	Reverse transcriptase domain and Zinc finger, CCHC-type domain-containing protein		SVE_0276900	Integrase, catalytic core domain and Ribonuclease H-like domain-containing protein		Unknown;Motif:rnd-1.1406	534	3
														SVE_0810200	AAA+ ATPase domain and ATPase, AAA-type, core domain and P-loop containing nucleoside triphosphate hydrolase domain-containing protein		SVE_0610700	---NA---		Unknown;Motif:rnd-1.1416	992	4
														SVE_0832800	hypothetical protein CRE_27914, partial		SVE_0685900	Reverse transcriptase domain and Integrase, catalytic core domain and Zinc finger, CCHC-type domain and Ribonuclease H-like domain and Aspartic peptidase domain-containing protein		Unknown;Motif:rnd-1.1443	208	1
														SVE_0852300	unnamed protein product, partial		SVE_0797400	Astacin-like metalloendopeptidase		Unknown;Motif:rnd-1.1568	270	1
														SVE_0859900	Glycoprotein-N-acetylgalactosamine 3-beta-galactosyltransferase 1		SVE_1152900	unnamed protein product		Unknown;Motif:rnd-1.1621	338	1
														SVE_0866100	Hypothetical protein SRAE_X000231900		SVE_1246400	---NA---		Unknown;Motif:rnd-1.1671	268	1
														SVE_0913900	---NA---		SVE_1248300	Transposon Tf2-6 polyprotein		Unknown;Motif:rnd-1.1673	456	5
														SVE_1063400	Reverse transcriptase domain and Integrase, catalytic core domain and Ribonuclease H-like domain and Peptidase A2A, retrovirus RVP subgroup domain and Aspartic peptidase domain-containing protein		SVE_1266200	Pro-Pol polyprotein		Unknown;Motif:rnd-1.1771	59	1
														SVE_1076100	Astacin-like metalloendopeptidase		SVE_1266700	Reverse transcriptase domain and Integrase, catalytic core domain and Zinc finger, CCHC-type domain and Ribonuclease H-like domain-containing protein		Unknown;Motif:rnd-1.1848	400	1
														SVE_1079500	Reverse transcriptase domain and Integrase, catalytic core domain and Ribonuclease H-like domain and Peptidase A2A, retrovirus RVP subgroup domain and AT hook-like family and Aspartic peptidase domain-containing protein		SVE_1306000	---NA---		Unknown;Motif:rnd-1.1907	218	2
														SVE_1080300	Reverse transcriptase domain and Integrase, catalytic core domain and Ribonuclease H-like domain-containing protein		SVE_1331000	---NA---		Unknown;Motif:rnd-1.2091	1492	1
														SVE_1084000	Reverse transcriptase domain and Integrase,catalytic core domain and Ribonuclease H-like domain and AT hook-like family and Aspartic peptidase domain-containing protein		SVE_1439300	Reverse transcriptase domain-containing protein		Unknown;Motif:rnd-1.2123	173	2
														SVE_1098700	Reverse transcriptase domain and Integrase,catalytic core domain and Zinc finger, CCHC-type domain and Ribonuclease H-like domain and Aspartic peptidase domain-containing protein		SVE_1490000	Reverse transcriptase domain and Integrase,catalytic core domain and Ribonuclease H-like domain and Aspartic peptidase domain-containing protein		Unknown;Motif:rnd-1.2310	1014	1
														SVE_1106800	Integrase, catalytic core domain and Ribonuclease H-like domain-containing protein		SVE_1494900	---NA---		Unknown;Motif:rnd-1.2320	626	1
														SVE_1117300	TPA: transposase domain-containing protein		SVE_1781700	---NA---		Unknown;Motif:rnd-1.2324	711	1
														SVE_1126600	Retrovirus-related Pol polyprotein from transposon 17.6		SVE_2020100	---NA---		Unknown;Motif:rnd-1.2327	587	2
														SVE_1155200	Reverse transcriptase domain and Integrase, catalytic core domain and Ribonuclease H-like domain and Aspartic peptidase domain-containing protein		SVE_2028000	---NA---		Unknown;Motif:rnd-1.2329	611	3
														SVE_1163500	Reverse transcriptase domain and Zinc finger,CCHC-type domain and Aspartic peptidase domain-containing protein		SVE_0217900	uncharacterized protein K02A2.6-like		Unknown;Motif:rnd-1.2331	1016	4
														SVE_1218800	---NA---		SVE_0293100	---NA---		Unknown;Motif:rnd-1.2345	812	1
														SVE_1218900	---NA---		SVE_0355500	---NA---		Unknown;Motif:rnd-1.2352	373	2
														SVE_1220200	putative LTR retrotransposon		SVE_0614300	Reverse transcriptase domain-containing protein		Unknown;Motif:rnd-1.249	239	1
														SVE_1220300	Reverse transcriptase domain-containing protein		SVE_0733200	Reverse transcriptase domain and Zinc finger, CCHC-type domain-containing protein		Unknown;Motif:rnd-1.2629	1199	1
														SVE_1222400	G1/S-specific cyclin-E		SVE_0734600	---NA---		Unknown;Motif:rnd-1.2682	1669	1
														SVE_1222700	---NA---		SVE_0763000	Reverse transcriptase domain and Integrase, catalytic core domain and Zinc finger, CCHC-type domain and Ribonuclease H-like domain and Aspartic peptidase domain-containing protein		Unknown;Motif:rnd-1.2683	485	1
														SVE_1222900	Transthyretin-like family-containing protein		SVE_0859700	---NA---		Unknown;Motif:rnd-1.2685	1334	1
														SVE_1244200	DNA helicase Pif1 like family and P-loop containing nucleoside triphosphate hydrolase domain-containing protein		SVE_1062900	Integrase, catalytic core domain and Ribonuclease H-like domain-containing protein		Unknown;Motif:rnd-1.2726	634	3
														SVE_1252700	---NA---		SVE_1162700	---NA---		Unknown;Motif:rnd-1.2944	975	2
														SVE_1267400	Reverse transcriptase domain and Integrase,catalytic core domain and Ribonuclease H domain and Ribonuclease H-like domain-containing protein		SVE_1165300	Reverse transcriptase domain and Integrase,catalytic core domain and Ribonuclease H-like domain-containing protein		Unknown;Motif:rnd-1.2985	516	1
														SVE_1274600	---NA---		SVE_1249400	Cation-transporting P-type ATPase family and Cation-transporting P-type ATPase, subfamily V and P-type ATPase, A domain and HAD-like domain and P-type ATPase, cytoplasmic domain N-containing protein		Unknown;Motif:rnd-1.3047	732	2
														SVE_1277900	---NA---		SVE_1252300	NC domain containing protein		Unknown;Motif:rnd-1.3053	1146	1
														SVE_1278400	---NA---		SVE_1330300	Transposon Ty3-G Gag-Pol polyprotein		Unknown;Motif:rnd-1.3058	1143	1
														SVE_1279400	Reverse transcriptase domain and Integrase,catalytic core domain and Ribonuclease H-like domain and AT hook-like family and Aspartic peptidase domain-containing protein		SVE_1387800	---NA---		Unknown;Motif:rnd-1.3220	161	2
														SVE_1317900	Reverse transcriptase domain-containing protein		SVE_1417600	retrovirus-related Pol polyprotein from transposon TNT 1-94		Unknown;Motif:rnd-1.3221	809	1
														SVE_1335100	uncharacterized protein K02A2.6-like		SVE_1495000	Hypothetical protein SRAE_0000051000		Unknown;Motif:rnd-1.3222	799	1
														SVE_1402000	Reverse transcriptase domain and Integrase,catalytic core domain and Ribonuclease H-like domain and AT hook-like family and Aspartic peptidase domain-containing protein		SVE_1777900	Reverse transcriptase domain and Integrase,catalytic core domain and Ribonuclease H-like domain and Aspartic peptidase domain-containing protein		Unknown;Motif:rnd-1.3399	1110	1
														SVE_1418400	Reverse transcriptase domain and Integrase,catalytic core domain and Ribonuclease H-like domain and AT hook-like family and Aspartic peptidase domain-containing protein		SVE_1778200	---NA---		Unknown;Motif:rnd-1.3573	385	1
														SVE_1419300	---NA---		SVE_1779700	Reverse transcriptase domain and Integrase,catalytic core domain and Ribonuclease H-like domain and AT hook-like family and Aspartic peptidase domain-containing protein		Unknown;Motif:rnd-1.3574	843	1
														SVE_1481800	Reverse transcriptase domain and Integrase,catalytic core domain and Ribonuclease H-like domain and AT hook-like family and Aspartic peptidase domain-containing protein		SVE_1851400	Aspartic peptidase domain-containing protein		Unknown;Motif:rnd-1.3730	937	1
														SVE_1517700	Reverse transcriptase domain-containing protein		SVE_2010100	Hypothetical protein SRAE_X000232400		Unknown;Motif:rnd-1.3731	1334	1
														SVE_1557900	---NA---		SVE_1000925750	unnamed protein product		Unknown;Motif:rnd-1.3734	1687	4
														SVE_1661500	Zinc finger, CCHC-type domain and Peptidase A2A,retrovirus RVP subgroup domain and Aspartic peptidase domain-containing protein		SVE_0094400	---NA---		Unknown;Motif:rnd-1.3735	1299	1
														SVE_1687500	nucleocapsid		SVE_0175100	---NA---		Unknown;Motif:rnd-1.3766	1555	2
														SVE_1687600	---NA---		SVE_0201800	---NA---		Unknown;Motif:rnd-1.4012	178	1
														SVE_1707200	Reverse transcriptase domain and Integrase,catalytic core domain and Ribonuclease H-like domain and Aspartic peptidase domain-containing protein		SVE_0229400	---NA---		Unknown;Motif:rnd-1.4048	680	1
														SVE_1780900	---NA---		SVE_0278100	hypothetical protein B9Z55_020954		Unknown;Motif:rnd-1.4049	1628	10
														SVE_1781600	---NA---		SVE_0343900	Reverse transcriptase domain and Integrase, catalytic core domain and Zinc finger, CCHC-type domain and Ribonuclease H-like domain-containing protein		Unknown;Motif:rnd-1.4056	217	3
														SVE_1785500	hypothetical protein B9Z55_000634		SVE_0612800	Helicase, C-terminal domain and Helicase-associated domain and Domain of unknown function DUF1605 domain and Helicase, superfamily 1/2, ATP-binding domain and P-loop containing nucleoside triphosphate hydrolase domain-containing protein		Unknown;Motif:rnd-1.4062	1330	1
														SVE_1793100	Reverse transcriptase domain-containing protein		SVE_0615600	unnamed protein product, partial		Unknown;Motif:rnd-1.4380	1546	1
														SVE_1851900	Acetylcholinesterase		SVE_0628300	Histone-lysine N-methyltransferase SETMAR		Unknown;Motif:rnd-1.4843	2545	2
														SVE_1858900	GPCR, rhodopsin-like, 7TM domain and 7TM GPCR, serpentine receptor class v (Srv) family-containing protein		SVE_0634100	---NA---		Unknown;Motif:rnd-1.4858	745	2
														SVE_1919400	Reverse transcriptase domain and Integrase,catalytic core domain and Ribonuclease H-like domain and AT hook-like family and Aspartic peptidase domain-containing protein		SVE_0651000	uncharacterized mitochondrial protein AtMg00810-like		Unknown;Motif:rnd-1.5038	972	1
														SVE_1920300	Reverse transcriptase domain and Integrase,catalytic core domain and Ribonuclease H-like domain and AT hook-like family and Aspartic peptidase domain-containing protein		SVE_0655200	---NA---		Unknown;Motif:rnd-1.5040	168	2
														SVE_1958200	---NA---		SVE_0680500	BTB and MATH domain-containing protein 43		Unknown;Motif:rnd-1.5042	282	2
														SVE_1976500	Reverse transcriptase domain and Integrase,catalytic core domain and Ribonuclease H domain and Ribonuclease H-like domain-containing protein		SVE_0724200	ATP-dependent DNA helicase PIF1-like		Unknown;Motif:rnd-1.5048	483	1
														SVE_1989600	---NA---		SVE_0732600	---NA---		Unknown;Motif:rnd-1.5221	722	1
														SVE_2012400	---NA---		SVE_0741600	---NA---		Unknown;Motif:rnd-1.5348	445	1
														SVE_0216400	---NA---		SVE_0799300	---NA---		Unknown;Motif:rnd-1.5435	1091	1
														SVE_0596700	Reverse transcriptase domain and Integrase,catalytic core domain and Zinc finger, CCHC-type domain and Ribonuclease H-like domain and Aspartic peptidase domain-containing protein		SVE_0812900	Reverse transcriptase domain and Integrase, catalytic core domain and Ribonuclease H-like domain and Peptidase A2A, retrovirus RVP subgroup domain and AT hook-like family and Aspartic peptidase domain-containing protein		Unknown;Motif:rnd-1.5442	1089	1
														SVE_0609200	---NA---		SVE_0831400	Astacin-like metalloendopeptidase		Unknown;Motif:rnd-1.5463	910	1
														SVE_0610500	---NA---		SVE_0833700	---NA---		Unknown;Motif:rnd-1.5474	549	1
														SVE_0611300	Retrovirus-related Pol polyprotein from transposon gypsy-like Protein		SVE_0859800	---NA---		Unknown;Motif:rnd-1.5496	909	2
														SVE_0614200	Reverse transcriptase domain-containing protein		SVE_0893800	Copia protein		Unknown;Motif:rnd-1.564	1148	1
														SVE_0615000	---NA---		SVE_0894800	---NA---		Unknown;Motif:rnd-1.589	82	1
														SVE_0721200	Reverse transcriptase domain and Integrase,catalytic core domain and Ribonuclease H domain and Ribonuclease H-like domain-containing protein		SVE_0916200	---NA---		Unknown;Motif:rnd-1.5925	1498	1
														SVE_0740800	Transposase, ISXO2-like domain-containing protein		SVE_1063200	Reverse transcriptase domain and Integrase, catalytic core domain and Ribonuclease H-like domain and Peptidase A2A, retrovirus RVP subgroup domain and Aspartic peptidase domain-containing protein		Unknown;Motif:rnd-1.6078	596	1
														SVE_0767800	---NA---		SVE_1076500	Moulting cycle MLT-10-like protein family-containing protein		Unknown;Motif:rnd-1.6101	596	1
														SVE_0833600	putative reverse transcriptase		SVE_1093800	Hypothetical protein SRAE_0000050600		Unknown;Motif:rnd-1.6104	596	3
														SVE_0916100	---NA---		SVE_1108000	---NA---		Unknown;Motif:rnd-1.6151	596	1
														SVE_1153100	---NA---		SVE_1218700	---NA---		Unknown;Motif:rnd-1.6152	629	1
														SVE_1273300	---NA---		SVE_1244300	Ovarian tumour, otubain domain and DNA helicase Pif1 like family and Helitron helicase-like domain and P-loop containing nucleoside triphosphate hydrolase domain-containing protein		Unknown;Motif:rnd-1.6153	381	1
														SVE_1286200	uncharacterized protein K02A2.6-like		SVE_1247200	ATP-dependent RNA helicase-like protein DOB1		Unknown;Motif:rnd-1.624	702	1
														SVE_1333500	---NA---		SVE_1248100	---NA---		Unknown;Motif:rnd-1.637	675	1
														SVE_1398000	Alpha-1,6-mannosyl-glycoprotein 2-beta-N-acetylglucosaminyltransferase		SVE_1249000	---NA---		Unknown;Motif:rnd-1.6434	306	1
														SVE_1492000	STAT transcription factor, all-alpha domain-containing protein		SVE_1266600	Reverse transcriptase domain and Integrase, catalytic core domain and Zinc finger, CCHC-type domain and Ribonuclease H-like domain-containing protein		Unknown;Motif:rnd-1.653	535	4
														SVE_1509100	Zinc finger, CCHC-type domain and Ribonuclease H-like domain-containing protein		SVE_1277800	---NA---		Unknown;Motif:rnd-1.6534	1328	1
														SVE_1534300	---NA---		SVE_1285200	---NA---		Unknown;Motif:rnd-1.6543	974	2
														SVE_1776000	---NA---		SVE_1309000	uncharacterized protein LOC112708942		Unknown;Motif:rnd-1.668	220	2
														SVE_1777800	Reverse transcriptase domain and Integrase,catalytic core domain and Ribonuclease H-like domain and AT hook-like family and Aspartic peptidase domain-containing protein		SVE_1418100	---NA---		Unknown;Motif:rnd-1.6828	813	1
														SVE_1920100	---NA---		SVE_1431300	---NA---		Unknown;Motif:rnd-1.6892	682	1
														SVE_2011300	piggyBac transposable element-derived protein 4-like isoform X1		SVE_1438400	Hypothetical protein SRAE_0000002200		Unknown;Motif:rnd-1.7022	1458	1
														SVE_2018500	---NA---		SVE_1439400	Reverse transcriptase domain-containing protein		Unknown;Motif:rnd-1.7052	230	2
														SVE_0050300	Reverse transcriptase domain and Integrase,catalytic core domain and Ribonuclease H domain and Ribonuclease H-like domain-containing protein		SVE_1534200	---NA---		Unknown;Motif:rnd-1.7053	280	5
														SVE_0064400	---NA---		SVE_1663600	---NA---		Unknown;Motif:rnd-1.7058	200	1
														SVE_0156400	histones H3 and H4-like protein		SVE_1778500	Hypothetical protein SRAE_0000048900		Unknown;Motif:rnd-1.7060	154	2
														SVE_0293200	Reverse transcriptase domain and Integrase,catalytic core domain and Ribonuclease H-like domain and AT hook-like family and Aspartic peptidase domain-containing protein		SVE_1778800	hypothetical protein Y032_0007g3255		Unknown;Motif:rnd-1.7215	268	5
														SVE_0356500	Integrase, catalytic core domain and Ribonuclease H-like domain-containing protein		SVE_1948400	---NA---		Unknown;Motif:rnd-1.7216	741	5
														SVE_0595600	reverse transcriptase		SVE_1962600	putative ATP-dependent RNA helicase YLR419W		Unknown;Motif:rnd-1.7218	577	1
														SVE_0607600	DNA helicase Pif1 like family and P-loop containing nucleoside triphosphate hydrolase domain-containing protein		SVE_1981600	---NA---		Unknown;Motif:rnd-1.7220	274	2
														SVE_0609500	---NA---		SVE_1988900	---NA---		Unknown;Motif:rnd-1.7221	674	1
														SVE_0738200	Integrase, catalytic core domain and Ribonuclease H-like domain-containing protein		SVE_2005800	---NA---		Unknown;Motif:rnd-1.7222	223	2
														SVE_0741100	Reverse transcriptase, RNA-dependent DNA polymerase domain-containing protein		SVE_2029200	---NA---		Unknown;Motif:rnd-1.7223	742	9
														SVE_0759500	Reverse transcriptase domain and Integrase,catalytic core domain and Ribonuclease H-like domain and Aspartic peptidase domain-containing protein		SVE_0092300	Zinc finger, CCHC-type domain-containing protein		Unknown;Motif:rnd-1.7224	252	2
														SVE_0866000	---NA---		SVE_0092500	Reverse transcriptase domain and Aspartic peptidase domain-containing protein		Unknown;Motif:rnd-1.7225	391	8
														SVE_1093900	Hypothetical protein SRAE_0000050600		SVE_0094000	PREDICTED: uncharacterized protein K02A2.6-like, partial		Unknown;Motif:rnd-1.7226	308	3
														SVE_1106500	Zinc finger, CCHC-type domain-containing protein		SVE_0113500	---NA---		Unknown;Motif:rnd-1.7227	278	1
														SVE_1151600	---NA---		SVE_0114000	---NA---		Unknown;Motif:rnd-1.7229	119	1
														SVE_1152600	uncharacterized protein LOC116167017		SVE_0166400	---NA---		Unknown;Motif:rnd-1.7231	165	1
														SVE_1185800	---NA---		SVE_0263900	Reverse transcriptase domain and Integrase, catalytic core domain and Zinc finger, CCHC-type domain and Ribonuclease H-like domain and Aspartic peptidase domain-containing protein		Unknown;Motif:rnd-1.7232	374	1
														SVE_1186400	Reverse transcriptase domain and Integrase,catalytic core domain and Ribonuclease H-like domain and Retroviral aspartyl protease domain and Aspartic peptidase domain-containing protein		SVE_0271600	Hypothetical protein SRAE_X000232000		Unknown;Motif:rnd-1.7235	249	2
														SVE_1186500	Reverse transcriptase domain and Integrase,catalytic core domain and Ribonuclease H-like domain and Retroviral aspartyl protease domain and Aspartic peptidase domain-containing protein		SVE_0271700	Hypothetical protein SRAE_X000231900		Unknown;Motif:rnd-1.7236	663	1
														SVE_1252900	---NA---		SVE_0288300	ribonuclease H-like domain-containing protein		Unknown;Motif:rnd-1.7237	223	5
														SVE_1266000	---NA---		SVE_0291700	---NA---		Unknown;Motif:rnd-1.7238	742	8
														SVE_1275900	---NA---		SVE_0292200	Hypothetical protein SRAE_0000049200		Unknown;Motif:rnd-1.7239	252	2
														SVE_1316400	ORF2		SVE_0293400	Reverse transcriptase domain and Integrase,catalytic core domain and Ribonuclease H-like domain and AT hook-like family and Aspartic peptidase domain-containing protein		Unknown;Motif:rnd-1.7240	391	3
														SVE_1319000	Alpha-1,6-mannosyl-glycoprotein 2-beta-N-acetylglucosaminyltransferase		SVE_0368600	---NA---		Unknown;Motif:rnd-1.7241	309	2
														SVE_1565700	Reverse transcriptase, RNA-dependent DNA polymerase domain-containing protein		SVE_0594700	---NA---		Unknown;Motif:rnd-1.7242	277	2
														SVE_1661400	Reverse transcriptase domain and Integrase, catalytic core domain and Zinc finger, CCHC-type domain and Ribonuclease H-like domain and Aspartic peptidase domain-containing protein		SVE_0603500	Reverse transcriptase domain and Integrase, catalytic core domain and Ribonuclease H-like domain-containing protein		Unknown;Motif:rnd-1.7243	692	14
														SVE_1663700	---NA---		SVE_0607700	Helitron helicase-like domain-containing protein		Unknown;Motif:rnd-1.7245	662	1
														SVE_1778000	---NA---		SVE_0607900	---NA---		Unknown;Motif:rnd-1.7246	211	2
														SVE_1779600	Transposon Tf2-9 polyprotein		SVE_0610300	Hypothetical protein SRAE_0000047600		Unknown;Motif:rnd-1.7247	508	1
														SVE_1781100	---NA---		SVE_0610400	Hypothetical protein SRAE_0000064800		Unknown;Motif:rnd-1.7248	533	18
														SVE_1794000	Hypothetical protein SRAE_2000127400		SVE_0612900	ATP-dependent RNA helicase A-like		Unknown;Motif:rnd-1.7249	729	3
														SVE_1850100	Reverse transcriptase domain and Integrase,catalytic core domain and Ribonuclease H domain and Ribonuclease H-like domain-containing protein		SVE_0613200	Helicase, C-terminal domain and P-loop containing nucleoside triphosphate hydrolase domain-containing protein		Unknown;Motif:rnd-1.7252	451	2
														SVE_1934700	mRNA export factor		SVE_0614900	---NA---		Unknown;Motif:rnd-1.7253	210	1
														SVE_1953500	Condensin-2 complex subunit D3		SVE_0630800	Reverse transcriptase domain and Integrase, catalytic core domain and Ribonuclease H-like domain and Peptidase A2A, retrovirus RVP subgroup domain and AT hook-like family and Aspartic peptidase domain-containing protein		Unknown;Motif:rnd-1.7254	280	1
														SVE_1991000	---NA---		SVE_0633900	Hypothetical protein SRAE_0000065600		Unknown;Motif:rnd-1.7256	443	1
														SVE_2015700	---NA---		SVE_0650300	retrovirus-related Pol polyprotein from transposon TNT 1-94		Unknown;Motif:rnd-1.7257	252	1
														SVE_2020000	---NA---		SVE_0666500	Reverse transcriptase domain and Integrase,catalytic core domain and Ribonuclease H-like domain and AT hook-like family and Aspartic peptidase domain-containing protein		Unknown;Motif:rnd-1.7258	747	6
														SVE_0174800	Hypothetical protein SRAE_1000107100		SVE_0681200	Hypothetical protein SRAE_1000022100		Unknown;Motif:rnd-1.7259	274	1
														SVE_0383900	Cell division GTP binding protein domain containing protein		SVE_0723300	---NA---		Unknown;Motif:rnd-1.7260	742	12
														SVE_0391500	Integrase, catalytic core domain and Ribonuclease H-like domain and AT hook-like family-containing protein		SVE_0724000	Reverse transcriptase domain and Integrase,catalytic core domain and Ribonuclease H-like domain and AT hook-like family and Aspartic peptidase domain-containing protein		Unknown;Motif:rnd-1.7261	268	3
														SVE_0415300	RZZ complex, subunit Zw10 family-containing protein		SVE_0725000	Reverse transcriptase domain and Integrase,catalytic core domain and Ribonuclease H domain and Ribonuclease H-like domain-containing protein		Unknown;Motif:rnd-1.7262	332	5
														SVE_0610100	THO complex subunit 2		SVE_0725200	uncharacterized protein LOC117241441		Unknown;Motif:rnd-1.7263	149	1
														SVE_0613000	---NA---		SVE_0727400	Astacin-like metalloendopeptidase		Unknown;Motif:rnd-1.7264	1675	7
														SVE_0626000	---NA---		SVE_0759200	---NA---		Unknown;Motif:rnd-1.7266	912	1
														SVE_0686600	---NA---		SVE_0759700	Reverse transcriptase domain and Integrase,catalytic core domain and Ribonuclease H-like domain and Aspartic peptidase domain-containing protein		Unknown;Motif:rnd-1.7451	71	1
														SVE_0721300	Reverse transcriptase domain and Integrase,catalytic core domain and Ribonuclease H domain and Ribonuclease H-like domain-containing protein		SVE_0765000	---NA---		Unknown;Motif:rnd-1.7452	305	3
														SVE_0738100	Reverse transcriptase domain and Integrase, catalytic core domain and Zinc finger, CCHC-type domain and Ribonuclease H-like domain and Aspartic peptidase domain-containing protein		SVE_0770500	Reverse transcriptase domain-containing protein		Unknown;Motif:rnd-1.7454	1223	1
														SVE_0830500	hypothetical protein B9Z55_022683		SVE_0775400	Transposon Ty3-I Gag-Pol polyprotein		Unknown;Motif:rnd-1.7477	1021	1
														SVE_0832700	ATP-dependent DNA helicase PIF7		SVE_0799700	ATP-dependent RNA helicase, putative		Unknown;Motif:rnd-1.7496	268	1
														SVE_0887400	Reverse transcriptase domain and Integrase,catalytic core domain and Ribonuclease H domain and Ribonuclease H-like domain-containing protein		SVE_0801200	uncharacterized protein LOC111105213		Unknown;Motif:rnd-1.7522	733	3
														SVE_0892600	---NA---		SVE_0801600	Reverse transcriptase domain and Zinc finger, CCHC-type domain-containing protein		Unknown;Motif:rnd-1.7677	976	1
														SVE_0899500	---NA---		SVE_0810200	AAA+ ATPase domain and ATPase, AAA-type, core domain and P-loop containing nucleoside triphosphate hydrolase domain-containing protein		Unknown;Motif:rnd-1.7688	1223	1
														SVE_1080400	uncharacterized protein FVRRES_02584		SVE_0832800	hypothetical protein CRE_27914, partial		Unknown;Motif:rnd-1.7694	728	2
														SVE_1101500	---NA---		SVE_0852300	unnamed protein product, partial		Unknown;Motif:rnd-1.771	930	1
														SVE_1154700	uncharacterized protein LOC112461236, partial		SVE_0859900	Glycoprotein-N-acetylgalactosamine 3-beta-galactosyltransferase 1		Unknown;Motif:rnd-1.7740	563	1
														SVE_1163600	Reverse transcriptase domain and Zinc finger,CCHC-type domain and Aspartic peptidase domain-containing protein		SVE_0866100	Hypothetical protein SRAE_X000231900		Unknown;Motif:rnd-1.785	1719	1
														SVE_1231200	hypothetical protein		SVE_0913900	---NA---		Unknown;Motif:rnd-1.7879	625	1
														SVE_1248600	---NA---		SVE_1063400	Reverse transcriptase domain and Integrase, catalytic core domain and Ribonuclease H-like domain and Peptidase A2A, retrovirus RVP subgroup domain and Aspartic peptidase domain-containing protein		Unknown;Motif:rnd-1.7890	2684	1
														SVE_1310500	Ribonuclease H-like domain-containing protein		SVE_1076100	Astacin-like metalloendopeptidase		Unknown;Motif:rnd-1.7905	245	1
														SVE_1318800	---NA---		SVE_1079500	Reverse transcriptase domain and Integrase, catalytic core domain and Ribonuclease H-like domain and Peptidase A2A, retrovirus RVP subgroup domain and AT hook-like family and Aspartic peptidase domain-containing protein		Unknown;Motif:rnd-1.7944	341	1
														SVE_1333600	hypothetical protein CF328_g7912, partial		SVE_1080300	Reverse transcriptase domain and Integrase, catalytic core domain and Ribonuclease H-like domain-containing protein		Unknown;Motif:rnd-1.7959	866	2
														SVE_1402400	Reverse transcriptase domain and Integrase,catalytic core domain and Ribonuclease H-like domain and AT hook-like family and Aspartic peptidase domain-containing protein		SVE_1084000	Reverse transcriptase domain and Integrase,catalytic core domain and Ribonuclease H-like domain and AT hook-like family and Aspartic peptidase domain-containing protein		Unknown;Motif:rnd-1.7961	1326	1
														SVE_1417500	Retrovirus-related Pol polyprotein from transposon TNT 1-94		SVE_1098700	Reverse transcriptase domain and Integrase,catalytic core domain and Zinc finger, CCHC-type domain and Ribonuclease H-like domain and Aspartic peptidase domain-containing protein		Unknown;Motif:rnd-1.7977	174	1
														SVE_1777700	Reverse transcriptase domain and Integrase,catalytic core domain and Ribonuclease H-like domain and AT hook-like family and Aspartic peptidase domain-containing protein		SVE_1106800	Integrase, catalytic core domain and Ribonuclease H-like domain-containing protein		Unknown;Motif:rnd-1.7982	1016	3
														SVE_1921400	AAA family ATPase		SVE_1117300	TPA: transposase domain-containing protein		Unknown;Motif:rnd-1.7989	139	1
														SVE_1962400	Zinc finger, CCHC-type domain-containing protein		SVE_1126600	Retrovirus-related Pol polyprotein from transposon 17.6		Unknown;Motif:rnd-1.7997	240	1
														SVE_2002600	---NA---		SVE_1155200	Reverse transcriptase domain and Integrase, catalytic core domain and Ribonuclease H-like domain and Aspartic peptidase domain-containing protein		Unknown;Motif:rnd-1.8002	681	1
														SVE_2018900	Density-regulated protein		SVE_1163500	Reverse transcriptase domain and Zinc finger,CCHC-type domain and Aspartic peptidase domain-containing protein		Unknown;Motif:rnd-1.8003	2322	7
														SVE_0216300	Hypothetical protein SRAE_0000050600		SVE_1218800	---NA---		Unknown;Motif:rnd-1.8010	186	1
														SVE_1107800	---NA---		SVE_1218900	---NA---		Unknown;Motif:rnd-1.8017	178	2
														SVE_0271400	Reverse transcriptase domain and Integrase, catalytic core domain and Zinc finger, CCHC-type domain and Peptidase A2A, retrovirus, catalytic domain and Ribonuclease H-like domain and Peptidase A2A, retrovirus RVP subgroup domain and Aspartic peptidase domain-containing protein		SVE_1220200	putative LTR retrotransposon		Unknown;Motif:rnd-1.8018	753	1
														SVE_1155000	Reverse transcriptase domain and Integrase, catalytic core domain and Ribonuclease H-like domain and Aspartic peptidase domain-containing protein		SVE_1220300	Reverse transcriptase domain-containing protein		Unknown;Motif:rnd-1.8019	532	3
														SVE_1245300	DUF1768 domain-containing protein		SVE_1222400	G1/S-specific cyclin-E		Unknown;Motif:rnd-1.8098	237	1
														SVE_1926100	---NA---		SVE_1222700	---NA---		Unknown;Motif:rnd-1.8100	182	1
														SVE_1919100	---NA---		SVE_1222900	Transthyretin-like family-containing protein		Unknown;Motif:rnd-1.8149	729	2
														SVE_0769600	---NA---		SVE_1244200	DNA helicase Pif1 like family and P-loop containing nucleoside triphosphate hydrolase domain-containing protein		Unknown;Motif:rnd-1.8154	1687	1
														SVE_2015900	---NA---		SVE_1246200	ATP-dependent RNA helicase A protein-like		Unknown;Motif:rnd-1.8162	650	9
														SVE_1683600	Integrase, catalytic core domain and Ribonuclease H-like domain-containing protein		SVE_1252700	---NA---		Unknown;Motif:rnd-1.8165	227	3
														SVE_0909600	ATP-dependent DNA helicase PIF1-like		SVE_1267400	Reverse transcriptase domain and Integrase,catalytic core domain and Ribonuclease H domain and Ribonuclease H-like domain-containing protein		Unknown;Motif:rnd-1.8173	468	1
														SVE_1148800	Glycoprotein-N-acetylgalactosamine 3-beta-galactosyltransferase 1		SVE_1274600	---NA---		Unknown;Motif:rnd-1.8176	212	1
														SVE_0003600	Bloom syndrome protein		SVE_1277900	---NA---		Unknown;Motif:rnd-1.8180	746	5
														SVE_0032400	Hypothetical protein SRAE_X000200400		SVE_1278400	---NA---		Unknown;Motif:rnd-1.8225	307	1
														SVE_0051600	Reverse transcriptase domain and Integrase,catalytic core domain and Ribonuclease H domain and Ribonuclease H-like domain-containing protein		SVE_1279400	Reverse transcriptase domain and Integrase,catalytic core domain and Ribonuclease H-like domain and AT hook-like family and Aspartic peptidase domain-containing protein		Unknown;Motif:rnd-1.8282	1306	1
														SVE_0081300	Reverse transcriptase domain and Integrase,catalytic core domain and Zinc finger, CCHC-type domain and Protein of unknown function DUF1759 family and Ribonuclease H-like domain and Aspartic peptidase domain-containing protein		SVE_1317900	Reverse transcriptase domain-containing protein		Unknown;Motif:rnd-1.845	671	1
														SVE_0092100	Reverse transcriptase domain and Integrase,catalytic core domain and Ribonuclease H-like domain and Aspartic peptidase domain-containing protein		SVE_1335100	uncharacterized protein K02A2.6-like		Unknown;Motif:rnd-1.8501	536	1
														SVE_0092800	---NA---		SVE_1402000	Reverse transcriptase domain and Integrase,catalytic core domain and Ribonuclease H-like domain and AT hook-like family and Aspartic peptidase domain-containing protein		Unknown;Motif:rnd-1.8503	664	1
														SVE_0094300	Reverse transcriptase domain and Integrase,catalytic core domain and Ribonuclease H domain and Ribonuclease H-like domain-containing protein		SVE_1418400	Reverse transcriptase domain and Integrase,catalytic core domain and Ribonuclease H-like domain and AT hook-like family and Aspartic peptidase domain-containing protein		Unknown;Motif:rnd-1.8512	305	1
														SVE_0094500	Transposon Tf2-6 polyprotein		SVE_1419300	---NA---		Unknown;Motif:rnd-1.853	448	3
														SVE_0114300	Reverse transcriptase domain and Integrase, catalytic core domain and Zinc finger, CCHC-type domain and Ribonuclease H-like domain and Aspartic peptidase domain-containing protein		SVE_1481800	Reverse transcriptase domain and Integrase,catalytic core domain and Ribonuclease H-like domain and AT hook-like family and Aspartic peptidase domain-containing protein		Unknown;Motif:rnd-1.8533	706	1
														SVE_0114400	Integrase, catalytic core domain and Ribonuclease H-like domain-containing protein		SVE_1492100	hypothetical protein EVAR_31425_1		Unknown;Motif:rnd-1.8536	481	3
														SVE_0118300	Thrombospondin, type 1 repeat-containing protein		SVE_1517700	Reverse transcriptase domain-containing protein		Unknown;Motif:rnd-1.8544	196	1
														SVE_0139800	C2 domain and PDZ domain-containing protein		SVE_1557900	---NA---		Unknown;Motif:rnd-1.8545	246	2
														SVE_0163700	---NA---		SVE_1661500	Zinc finger, CCHC-type domain and Peptidase A2A,retrovirus RVP subgroup domain and Aspartic peptidase domain-containing protein		Unknown;Motif:rnd-1.8546	222	1
														SVE_0164600	Protein regulator of cytokinesis 1		SVE_1687500	nucleocapsid		Unknown;Motif:rnd-1.8716	1332	1
														SVE_0176800	Glycoprotein-N-acetylgalactosamine 3-beta-galactosyltransferase 1		SVE_1687600	---NA---		Unknown;Motif:rnd-1.875	532	4
														SVE_0196700	---NA---		SVE_1707200	Reverse transcriptase domain and Integrase,catalytic core domain and Ribonuclease H-like domain and Aspartic peptidase domain-containing protein		Unknown;Motif:rnd-1.876	752	2
														SVE_0206300	Integrase, catalytic core domain and Ribonuclease H-like domain-containing protein		SVE_1780900	---NA---		Unknown;Motif:rnd-1.882	739	1
														SVE_0212300	Reverse transcriptase domain and Integrase,catalytic core domain and Zinc finger, CCHC-type domain and Ribonuclease H-like domain and Aspartic peptidase domain-containing protein		SVE_1781600	---NA---		Unknown;Motif:rnd-1.883	902	1
														SVE_0228400	---NA---		SVE_1785500	hypothetical protein B9Z55_000634		Unknown;Motif:rnd-1.8832	1383	1
														SVE_0228500	---NA---		SVE_1793100	Reverse transcriptase domain-containing protein		Unknown;Motif:rnd-1.8834	332	1
														SVE_0235700	uncharacterized protein K02A2.6-like		SVE_1851900	Acetylcholinesterase		Unknown;Motif:rnd-1.8835	268	1
														SVE_0236700	Astacin-like metalloendopeptidase		SVE_1858900	GPCR, rhodopsin-like, 7TM domain and 7TM GPCR, serpentine receptor class v (Srv) family-containing protein		Unknown;Motif:rnd-1.8836	141	1
														SVE_0237300	Hypothetical protein SRAE_2000515500		SVE_1919400	Reverse transcriptase domain and Integrase,catalytic core domain and Ribonuclease H-like domain and AT hook-like family and Aspartic peptidase domain-containing protein		Unknown;Motif:rnd-1.8838	449	1
														SVE_0238900	Astacin-like metalloendopeptidase		SVE_1920300	Reverse transcriptase domain and Integrase,catalytic core domain and Ribonuclease H-like domain and AT hook-like family and Aspartic peptidase domain-containing protein		Unknown;Motif:rnd-1.8840	1663	1
														SVE_0253500	hypothetical protein Y032_0123g1179		SVE_1958200	---NA---		Unknown;Motif:rnd-1.885	408	2
														SVE_0270300	Ribonuclease H-like domain-containing protein		SVE_1976500	Reverse transcriptase domain and Integrase,catalytic core domain and Ribonuclease H domain and Ribonuclease H-like domain-containing protein		Unknown;Motif:rnd-1.8874	2685	1
														SVE_0270800	PREDICTED: uncharacterized protein K02A2.6-like		SVE_1989600	---NA---		Unknown;Motif:rnd-1.890	287	1
														SVE_0271500	---NA---		SVE_2007400	hypothetical protein L596_026066		Unknown;Motif:rnd-1.8949	288	2
														SVE_0278300	---NA---		SVE_2011400	Reverse transcriptase domain-containing protein		Unknown;Motif:rnd-1.9000	272	1
														SVE_0278700	---NA---		SVE_2012400	---NA---		Unknown;Motif:rnd-1.9010	240	1
														SVE_0279600	Serine/threonine-protein kinase polo		SVE_0216400	---NA---		Unknown;Motif:rnd-1.9038	1016	1
														SVE_0291200	CAP domain-containing protein		SVE_0216500	---NA---		Unknown;Motif:rnd-1.9039	110	1
														SVE_0291400	CAP domain-containing protein		SVE_0596700	Reverse transcriptase domain and Integrase,catalytic core domain and Zinc finger, CCHC-type domain and Ribonuclease H-like domain and Aspartic peptidase domain-containing protein		Unknown;Motif:rnd-1.9092	2037	1
														SVE_0291600	---NA---		SVE_0609200	---NA---		Unknown;Motif:rnd-1.9193	1924	1
														SVE_0292400	Hypothetical protein SRAE_0000050600		SVE_0610500	---NA---		Unknown;Motif:rnd-1.9217	2210	1
														SVE_0292900	---NA---		SVE_0611300	Retrovirus-related Pol polyprotein from transposon gypsy-like Protein		Unknown;Motif:rnd-1.9222	2207	1
														SVE_0293300	Ribonuclease H-like domain-containing protein		SVE_0614200	Reverse transcriptase domain-containing protein		Unknown;Motif:rnd-1.9248	1612	1
														SVE_0309400	Potassium channel subfamily K member 18		SVE_0615000	---NA---		Unknown;Motif:rnd-1.9249	2206	1
														SVE_0310900	Spectrin alpha chain, erythrocytic 1		SVE_0721200	Reverse transcriptase domain and Integrase,catalytic core domain and Ribonuclease H domain and Ribonuclease H-like domain-containing protein		Unknown;Motif:rnd-1.9339	718	1
														SVE_0319400	Astacin-like metalloendopeptidase		SVE_0722900	ATP-dependent DNA helicase pif1		Unknown;Motif:rnd-1.9357	698	2
														SVE_0325000	Hypothetical protein SRAE_X000231900		SVE_0740800	Transposase, ISXO2-like domain-containing protein		Unknown;Motif:rnd-1.9359	582	1
														SVE_0328900	Transposase, ISXO2-like domain-containing protein		SVE_0767800	---NA---		Unknown;Motif:rnd-1.9363	585	2
														SVE_0332800	cytochrome c/c1 heme lyase		SVE_0833600	putative reverse transcriptase		Unknown;Motif:rnd-1.9364	722	2
														SVE_0355400	Reverse transcriptase domain and Integrase, catalytic core domain and Zinc finger, CCHC-type domain and Ribonuclease H-like domain-containing protein		SVE_0895000	Golgi-associated plant pathogenesis-related protein 1-like		Unknown;Motif:rnd-1.9372	219	1
														SVE_0355600	Golgi-associated plant pathogenesis-related protein 1-like		SVE_0916100	---NA---		Unknown;Motif:rnd-1.9494	724	1
														SVE_0355700	PR-1-like protein		SVE_1153100	---NA---		Unknown;Motif:rnd-1.9535	1022	1
														SVE_0355800	Golgi-associated plant pathogenesis-related protein 1		SVE_1248400	---NA---		Unknown;Motif:rnd-1.9728	1326	4
														SVE_0364500	Spectrin beta chain, erythrocytic		SVE_1248500	---NA---		Unknown;Motif:rnd-1.9733	186	2
														SVE_0368200	Integrase, catalytic core domain and Ribonuclease H-like domain-containing protein		SVE_1273300	---NA---		Unknown;Motif:rnd-1.9735	278	1
														SVE_0381900	---NA---		SVE_1286200	uncharacterized protein K02A2.6-like		Unknown;Motif:rnd-1.9737	2899	15
														SVE_0382600	Glycoprotein-N-acetylgalactosamine 3-beta-galactosyltransferase 1		SVE_1306100	Reverse transcriptase domain and Integrase,catalytic core domain and Ribonuclease H-like domain and AT hook-like family and Aspartic peptidase domain-containing protein		Unknown;Motif:rnd-1.9738	681	12
														SVE_0382800	Reverse transcriptase domain and Integrase, catalytic core domain and Zinc finger, CCHC-type domain and Ribonuclease H-like domain-containing protein		SVE_1333500	---NA---		Unknown;Motif:rnd-1.9744	68	1
														SVE_0391300	Reverse transcriptase domain and Integrase, catalytic core domain and Zinc finger, CCHC-type domain and Ribonuclease H-like domain and Aspartic peptidase domain-containing protein		SVE_1398000	Alpha-1,6-mannosyl-glycoprotein 2-beta-N-acetylglucosaminyltransferase		Unknown;Motif:rnd-1.9747	241	1
														SVE_0439500	hypothetical protein L596_026519		SVE_1450400	Reverse transcriptase domain and Integrase,catalytic core domain and Ribonuclease H domain and Ribonuclease H-like domain-containing protein		Unknown;Motif:rnd-1.9921	870	2
														SVE_0448400	---NA---		SVE_1492000	STAT transcription factor, all-alpha domain-containing protein		Unknown;Motif:rnd-1.9925	2984	1
														SVE_0486000	Reverse transcriptase domain and Integrase,catalytic core domain and Ribonuclease H domain and Ribonuclease H-like domain-containing protein		SVE_1509100	Zinc finger, CCHC-type domain and Ribonuclease H-like domain-containing protein		Unknown;Motif:rnd-1.9959	1563	1
														SVE_0595900	unnamed protein product, partial		SVE_1534300	---NA---		Unknown;Motif:rnd-4.241	1531	10
														SVE_0596100	hypothetical protein L596_005623		SVE_1776000	---NA---		Unknown;Motif:rnd-4.246	272	1
														SVE_0596300	Astacin-like metalloendopeptidase		SVE_1777800	Reverse transcriptase domain and Integrase,catalytic core domain and Ribonuclease H-like domain and AT hook-like family and Aspartic peptidase domain-containing protein		Unknown;Motif:rnd-4.437	133	1
														SVE_0597400	hypothetical protein Y032_0573g168		SVE_1920100	---NA---		Unknown;Motif:rnd-4.65	921	1
														SVE_0597500	---NA---		SVE_2011300	piggyBac transposable element-derived protein 4-like isoform X1		Unknown;Motif:rnd-4.809	269	2
														SVE_0600700	Astacin-like metalloendopeptidase		SVE_2018500	---NA---		Unknown;Motif:rnd-4.813	264	1
														SVE_0610200	---NA---		SVE_0050300	Reverse transcriptase domain and Integrase,catalytic core domain and Ribonuclease H domain and Ribonuclease H-like domain-containing protein		Unknown;Motif:rnd-4.865	53	1
														SVE_0610800	Reverse transcriptase domain and Integrase,catalytic core domain and Ribonuclease H-like domain-containing protein		SVE_0064400	---NA---		Unknown;Motif:rnd-4.89	253	1
														SVE_0612000	---NA---		SVE_0156400	histones H3 and H4-like protein		Unknown;Motif:rnd-5.124	316	1
														SVE_0612100	---NA---		SVE_0217700	---NA---
														SVE_0612500	Integrase, catalytic core domain and Ribonuclease H-like domain-containing protein		SVE_0293200	Reverse transcriptase domain and Integrase,catalytic core domain and Ribonuclease H-like domain and AT hook-like family and Aspartic peptidase domain-containing protein
														SVE_0612700	---NA---		SVE_0323600	UDP-glucuronosyl/UDP-glucosyltransferase family-containing protein
														SVE_0613100	ATP-dependent RNA helicase A-like		SVE_0356500	Integrase, catalytic core domain and Ribonuclease H-like domain-containing protein
														SVE_0614700	Reverse transcriptase domain and Integrase,catalytic core domain and Ribonuclease H-like domain and AT hook-like family and Aspartic peptidase domain-containing protein		SVE_0595600	reverse transcriptase
														SVE_0615100	Integrase, catalytic core domain and Ribonuclease H-like domain-containing protein		SVE_0607600	DNA helicase Pif1 like family and P-loop containing nucleoside triphosphate hydrolase domain-containing protein
														SVE_0623000	Reverse transcriptase domain and Integrase,catalytic core domain and Zinc finger, CCHC-type domain and Ribonuclease H-like domain and Aspartic peptidase domain-containing protein		SVE_0609500	---NA---
														SVE_0625900	Reverse transcriptase domain and Integrase,catalytic core domain and Ribonuclease H domain and Ribonuclease H-like domain-containing protein		SVE_0687000	---NA---
														SVE_0627300	Reverse transcriptase domain and Integrase,catalytic core domain and Ribonuclease H domain and Ribonuclease H-like domain-containing protein		SVE_0733700	hypothetical protein L596_026376
														SVE_0633300	Hypothetical protein SRAE_X000180100		SVE_0738200	Integrase, catalytic core domain and Ribonuclease H-like domain-containing protein
														SVE_0633700	Hypothetical protein SRAE_2000170300		SVE_0741100	Reverse transcriptase, RNA-dependent DNA polymerase domain-containing protein
														SVE_0640800	Rad9/Ddc1 family-containing protein		SVE_0759500	Reverse transcriptase domain and Integrase,catalytic core domain and Ribonuclease H-like domain and Aspartic peptidase domain-containing protein
														SVE_0645500	---NA---		SVE_0866000	---NA---
														SVE_0645700	Reverse transcriptase domain and Integrase,catalytic core domain and Ribonuclease H-like domain and Aspartic peptidase domain-containing protein		SVE_0899600	---NA---
														SVE_0645900	retrovirus-related Pol polyprotein from transposon TNT 1-94		SVE_1093900	Hypothetical protein SRAE_0000050600
														SVE_0647000	Hypothetical protein SRAE_0000061900		SVE_1106500	Zinc finger, CCHC-type domain-containing protein
														SVE_0666400	uncharacterized protein LOC115880611		SVE_1148700	Glycoprotein-N-acetylgalactosamine 3-beta-galactosyltransferase 1
														SVE_0666700	Reverse transcriptase domain and Integrase,catalytic core domain and Ribonuclease H-like domain and AT hook-like family and Aspartic peptidase domain-containing protein		SVE_1151600	---NA---
														SVE_0666800	---NA---		SVE_1152600	uncharacterized protein LOC116167017
														SVE_0668300	---NA---		SVE_1185800	---NA---
														SVE_0671400	CAP domain-containing protein		SVE_1186400	Reverse transcriptase domain and Integrase,catalytic core domain and Ribonuclease H-like domain and Retroviral aspartyl protease domain and Aspartic peptidase domain-containing protein
														SVE_0671600	CAP domain-containing protein		SVE_1186500	Reverse transcriptase domain and Integrase,catalytic core domain and Ribonuclease H-like domain and Retroviral aspartyl protease domain and Aspartic peptidase domain-containing protein
														SVE_0677700	Reverse transcriptase domain and Integrase,catalytic core domain and Ribonuclease H domain and Ribonuclease H-like domain-containing protein		SVE_1252900	---NA---
														SVE_0679700	WD40 repeat and WD40/YVTN repeat-like-containing domain and WD40-repeat-containing domain-containing protein		SVE_1266000	---NA---
														SVE_0681100	Aminotransferase, class I/classII domain and Pyridoxal phosphate-dependent transferase, major region, subdomain 1 and Pyridoxal phosphate-dependent transferase, major region, subdomain 2 and Pyridoxal phosphate-dependent transferase domain-containing protein		SVE_1275900	---NA---
														SVE_0687200	Reverse transcriptase domain and Integrase,catalytic core domain and Ribonuclease H-like domain and Aspartic peptidase domain-containing protein		SVE_1316400	ORF2
														SVE_0722800	Retrotransposon-like protein 1		SVE_1319000	Alpha-1,6-mannosyl-glycoprotein 2-beta-N-acetylglucosaminyltransferase
														SVE_0723200	uncharacterized protein B4U80_09559, partial		SVE_1490200	---NA---
														SVE_0723600	---NA---		SVE_1565700	Reverse transcriptase, RNA-dependent DNA polymerase domain-containing protein
														SVE_0725300	hypothetical protein B9Z55_022845		SVE_1661400	Reverse transcriptase domain and Integrase, catalytic core domain and Zinc finger, CCHC-type domain and Ribonuclease H-like domain and Aspartic peptidase domain-containing protein
														SVE_0725500	---NA---		SVE_1663700	---NA---
														SVE_0733100	---NA---		SVE_1778000	---NA---
														SVE_0733400	Reverse transcriptase domain and Integrase, catalytic core domain and Zinc finger, CCHC-type domain and Ribonuclease H-like domain-containing protein		SVE_1779600	Transposon Tf2-9 polyprotein
														SVE_0733600	reverse transcriptase		SVE_1781100	---NA---
														SVE_0734700	DNA helicase Pif1 like family and P-loop containing nucleoside triphosphate hydrolase domain-containing protein		SVE_1794000	Hypothetical protein SRAE_2000127400
														SVE_0735400	Reverse transcriptase domain and Integrase, catalytic core domain and Zinc finger, CCHC-type domain and Ribonuclease H-like domain-containing protein		SVE_1850100	Reverse transcriptase domain and Integrase,catalytic core domain and Ribonuclease H domain and Ribonuclease H-like domain-containing protein
														SVE_0736200	Reverse transcriptase domain and Integrase, catalytic core domain and Ribonuclease H-like domain and Aspartic peptidase domain-containing protein		SVE_1934700	mRNA export factor
														SVE_0736600	Reverse transcriptase domain and Integrase, catalytic core domain and Zinc finger, CCHC-type domain and Ribonuclease H-like domain-containing protein		SVE_1953500	Condensin-2 complex subunit D3
														SVE_0740100	Hypothetical protein SRAE_X000237200		SVE_1991000	---NA---
														SVE_0741400	CAP domain-containing protein		SVE_2015700	---NA---
														SVE_0743000	ATP-dependent DNA helicase PIF1		SVE_2020000	---NA---
														SVE_0743100	---NA---		SVE_2021700	Zinc finger, CCHC-type domain and Ribonuclease H-like domain-containing protein
														SVE_0759600	Reverse transcriptase domain and Integrase,catalytic core domain and Ribonuclease H-like domain and Aspartic peptidase domain-containing protein		SVE_0001013900	---NA---
														SVE_0760300	Reverse transcriptase domain and Integrase,catalytic core domain and Ribonuclease H-like domain and Aspartic peptidase domain-containing protein		SVE_0014600	Dynactin subunit 5
														SVE_0761500	hypothetical protein CAEBREN_32143, partial		SVE_0094100	Reverse transcriptase domain and Integrase,catalytic core domain and Ribonuclease H domain and Ribonuclease H-like domain-containing protein
														SVE_0762900	Reverse transcriptase domain and Integrase, catalytic core domain and Zinc finger, CCHC-type domain and Ribonuclease H-like domain and Aspartic peptidase domain-containing protein		SVE_0102500	Hypothetical protein SRAE_X000151000
														SVE_0764800	Reverse transcriptase domain and Integrase, catalytic core domain and Ribonuclease H-like domain and Peptidase A2A, retrovirus RVP subgroup domain and Aspartic peptidase domain-containing protein		SVE_0114600	---NA---
														SVE_0764900	---NA---		SVE_0142200	---NA---
														SVE_0765100	Hypothetical protein SRAE_X000234600		SVE_0166200	Reverse transcriptase domain and Integrase,catalytic core domain and Ribonuclease H-like domain and AT hook-like family and Aspartic peptidase domain-containing protein
														SVE_0765200	---NA---		SVE_0174200	Hypothetical protein SRAE_1000107100
														SVE_0769500	---NA---		SVE_0174800	Hypothetical protein SRAE_1000107100
														SVE_0770000	Helicase, C-terminal domain and P-loop containing nucleoside triphosphate hydrolase domain-containing protein		SVE_0197200	---NA---
														SVE_0770200	dosage compensation regulator isoform X2		SVE_0228600	---NA---
														SVE_0770700	serine/threonine-protein kinase VRK1-like		SVE_0235200	ATP-dependent DNA helicase PIF1-like
														SVE_0771000	Acetylcholinesterase		SVE_0271300	---NA---
														SVE_0794500	DNA replication ATP-dependent helicase/nuclease DNA2		SVE_0274700	---NA---
														SVE_0801500	Reverse transcriptase domain and Integrase, catalytic core domain and Zinc finger, CCHC-type domain and Ribonuclease H-like domain-containing protein		SVE_0279200	Baculoviral inhibition of apoptosis protein repeat domain-containing protein
														SVE_0808900	---NA---		SVE_0292000	Integrase, catalytic core domain and Ribonuclease H-like domain-containing protein
														SVE_0811200	Reverse transcriptase domain and Integrase,catalytic core domain and Ribonuclease H domain and Ribonuclease H-like domain-containing protein		SVE_0292700	Reverse transcriptase domain and Integrase,catalytic core domain and Ribonuclease H-like domain and AT hook-like family and Aspartic peptidase domain-containing protein
														SVE_0811400	hypothetical protein EAG_04697		SVE_0323400	Speckle-type POZ protein
														SVE_0813300	Astacin-like metalloendopeptidase		SVE_0326300	Homeobox domain and Homeodomain-like-containing protein
														SVE_0813700	C2H2-type domain-containing protein		SVE_0329000	Density-regulated protein
														SVE_0830000	---NA---		SVE_0331400	WD40 repeat and WD40/YVTN repeat-like-containing domain and WD40-repeat-containing domain-containing protein
														SVE_0830400	PREDICTED: uncharacterized protein K02A2.6-like		SVE_0355900	ATP-dependent RNA helicase A isoform X1
														SVE_0831000	Reverse transcriptase domain and Integrase,catalytic core domain and Ribonuclease H-like domain and Aspartic peptidase domain-containing protein		SVE_0383900	Cell division GTP binding protein domain containing protein
														SVE_0831200	Astacin-like metalloendopeptidase		SVE_0391500	Integrase, catalytic core domain and Ribonuclease H-like domain and AT hook-like family-containing protein
														SVE_0831800	Reverse transcriptase domain and Integrase, catalytic core domain and Zinc finger, CCHC-type domain and Ribonuclease H-like domain-containing protein		SVE_0398100	---NA---
														SVE_0832100	Integrase, catalytic core domain and Ribonuclease H-like domain-containing protein		SVE_0415300	RZZ complex, subunit Zw10 family-containing protein
														SVE_0832600	ATP-dependent DNA helicase PIF1		SVE_0429700	Hypothetical protein SRAE_2000115500
														SVE_0833200	Reverse transcriptase domain and Integrase,catalytic core domain and Ribonuclease H-like domain and AT hook-like family and Aspartic peptidase domain-containing protein		SVE_0448800	Aldolase-type TIM barrel domain and Glycoside hydrolase, superfamily domain and Hyaluronidase family-containing protein
														SVE_0833300	Reverse transcriptase domain and Integrase,catalytic core domain and Ribonuclease H domain and Ribonuclease H-like domain-containing protein		SVE_0508800	Zinc transporter 5
														SVE_0833500	---NA---		SVE_0547100	Hypothetical protein SRAE_2000195700
														SVE_0848200	Hypothetical protein SRAE_X000231900		SVE_0600200	Protein F54D5.5, isoform b
														SVE_0849500	Integrase, catalytic core domain and Ribonuclease H-like domain-containing protein		SVE_0603400	Reverse transcriptase domain and Integrase, catalytic core domain and Ribonuclease H-like domain-containing protein
														SVE_0851800	Hypothetical protein SRAE_0000064800		SVE_0610100	THO complex subunit 2
														SVE_0851900	Hypothetical protein SRAE_0000065000		SVE_0613000	---NA---
														SVE_0865700	tyrosine-type recombinase/integrase		SVE_0626000	---NA---
														SVE_0865900	Hypothetical protein SRAE_0000049200		SVE_0654300	SOCS protein, C-terminal domain and B30.2/SPRY domain and SPla/RYanodine receptor SPRY domain and Concanavalin A-like lectin/glucanases superfamily domain and SPla/RYanodine receptor subgroup domain-containing protein
														SVE_0871400	---NA---		SVE_0686600	---NA---
														SVE_0893100	zonadhesin-like		SVE_0686800	---NA---
														SVE_0893200	mucin-2-like isoform X2		SVE_0687100	---NA---
														SVE_0893910	Astacin-like metalloendopeptidase		SVE_0687500	Reverse transcriptase domain-containing protein
														SVE_0896100	Reverse transcriptase domain and Integrase, catalytic core domain and Zinc finger, CCHC-type domain and Ribonuclease H-like domain and Aspartic peptidase domain-containing protein		SVE_0721300	Reverse transcriptase domain and Integrase,catalytic core domain and Ribonuclease H domain and Ribonuclease H-like domain-containing protein
														SVE_0897400	CAP domain-containing protein		SVE_0721800	---NA---
														SVE_0912000	---NA---		SVE_0724100	---NA---
														SVE_0917100	Astacin-like metalloendopeptidase		SVE_0724800	uncharacterized protein LOC100903664
														SVE_0932200	---NA---		SVE_0726400	---NA---
														SVE_1050400	Transposase, ISXO2-like domain-containing protein		SVE_0726500	---NA---
														SVE_1076200	Moulting cycle MLT-10-like protein family-containing protein		SVE_0735200	uncharacterized protein K02A2.6-like
														SVE_1080200	Transposon Ty3-I Gag-Pol polyprotein		SVE_0735600	Astacin-like metalloendopeptidase
														SVE_1083700	hypothetical protein B9Z55_028632		SVE_0737200	Alk
														SVE_1089400	BMA-NRF-5		SVE_0738100	Reverse transcriptase domain and Integrase, catalytic core domain and Zinc finger, CCHC-type domain and Ribonuclease H-like domain and Aspartic peptidase domain-containing protein
														SVE_1093000	Hypothetical protein SRAE_0000050800		SVE_0767600	Uridine kinase
														SVE_1093600	---NA---		SVE_0772100	Hypothetical protein SRAE_1000034900
														SVE_1094200	Hypothetical protein SRAE_0000050800		SVE_0775300	---NA---
														SVE_1098800	Hypothetical protein SRAE_X000147000		SVE_0800800	ATP-dependent DNA helicase PIF1-like
														SVE_1101900	---NA---		SVE_0812200	---NA---
														SVE_1105500	Reverse transcriptase domain and Integrase, catalytic core domain and Zinc finger, CCHC-type domain and Ribonuclease H-like domain-containing protein		SVE_0813900	transposase, partial
														SVE_1107200	---NA---		SVE_0830500	hypothetical protein B9Z55_022683
														SVE_1117500	---NA---		SVE_0832200	---NA---
														SVE_1117600	---NA---		SVE_0832700	ATP-dependent DNA helicase PIF7
														SVE_1117700	Hypothetical protein SRAE_X000234600		SVE_0833100	---NA---
														SVE_1117800	---NA---		SVE_0843300	Hypothetical protein SRAE_X000052000
														SVE_1120600	---NA---		SVE_0848700	---NA---
														SVE_1121800	Hypothetical predicted protein		SVE_0849600	Reverse transcriptase domain and Integrase,catalytic core domain and Ribonuclease H domain and Ribonuclease H-like domain-containing protein
														SVE_1124300	---NA---		SVE_0871500	---NA---
														SVE_1124500	hypothetical protein Bm1_53495, partial		SVE_0887400	Reverse transcriptase domain and Integrase,catalytic core domain and Ribonuclease H domain and Ribonuclease H-like domain-containing protein
														SVE_1124900	---NA---		SVE_0892600	---NA---
														SVE_1126900	---NA---		SVE_0899500	---NA---
														SVE_1152700	putative ribonuclease H-like domain-containing protein		SVE_0909300	---NA---
														SVE_1154000	---NA---		SVE_0913700	---NA---
														SVE_1154200	---NA---		SVE_0931900	---NA---
														SVE_1155400	Reverse transcriptase domain and Integrase, catalytic core domain and Ribonuclease H-like domain and Peptidase A2A, retrovirus RVP subgroup domain and Aspartic peptidase domain-containing protein		SVE_0932100	---NA---
														SVE_1158000	Protein argonaute-2		SVE_1063000	---NA---
														SVE_1162300	Lipid-binding serum glycoprotein, C-terminal domain and Lipid-binding serum glycoprotein, N-terminal domain and Bactericidal permeability-increasing protein, alpha/beta domain-containing protein		SVE_1080400	uncharacterized protein FVRRES_02584
														SVE_1165200	Reverse transcriptase domain and Integrase,catalytic core domain and Ribonuclease H-like domain-containing protein		SVE_1090100	Hypothetical protein SRAE_1000092400
														SVE_1165800	Reverse transcriptase domain and Integrase,catalytic core domain and Zinc finger, CCHC-type domain and Ribonuclease H-like domain and Aspartic peptidase domain-containing protein		SVE_1093100	---NA---
														SVE_1195900	putative transposable element		SVE_1094000	Hypothetical protein SRAE_0000050700
														SVE_1199200	---NA---		SVE_1101500	---NA---
														SVE_1209900	Golgi-associated plant pathogenesis-related protein 1-like		SVE_1101800	---NA---
														SVE_1210000	CAP domain-containing protein		SVE_1118000	---NA---
														SVE_1218300	---NA---		SVE_1126200	uncharacterized protein LOC112456624, partial
														SVE_1219400	---NA---		SVE_1126400	Protein CBG26851
														SVE_1219900	---NA---		SVE_1154300	putative mitochondrial protein
														SVE_1223500	---NA---		SVE_1154700	uncharacterized protein LOC112461236, partial
														SVE_1228300	---NA---		SVE_1163600	Reverse transcriptase domain and Zinc finger,CCHC-type domain and Aspartic peptidase domain-containing protein
														SVE_1228500	Reverse transcriptase domain and Integrase,catalytic core domain and Ribonuclease H-like domain and AT hook-like family and Aspartic peptidase domain-containing protein		SVE_1165400	Reverse transcriptase domain and Integrase,catalytic core domain and Ribonuclease H-like domain-containing protein
														SVE_1229000	---NA---		SVE_1165500	Reverse transcriptase domain and Integrase,catalytic core domain and Ribonuclease H-like domain-containing protein
														SVE_1231100	Reverse transcriptase domain and Zinc finger,CCHC-type domain and Peptidase A2A, retrovirus, catalytic domain-containing protein		SVE_1165700	---NA---
														SVE_1244500	Hypothetical protein SRAE_X000232900		SVE_1166100	Hypothetical protein SRAE_0000050900
														SVE_1245400	---NA---		SVE_1185900	Reverse transcriptase domain and Integrase,catalytic core domain and Ribonuclease H-like domain and AT hook-like family and Aspartic peptidase domain-containing protein
														SVE_1246100	Integrase, catalytic core domain and Ribonuclease H-like domain-containing protein		SVE_1186600	Reverse transcriptase domain-containing protein
														SVE_1247000	JmjC domain-containing protein		SVE_1196000	---NA---
														SVE_1247300	---NA---		SVE_1219100	---NA---
														SVE_1249300	Reverse transcriptase domain and Integrase, catalytic core domain and Zinc finger, CCHC-type domain and Ribonuclease H-like domain-containing protein		SVE_1219300	---NA---
														SVE_1253000	Hypothetical protein SRAE_0000050400		SVE_1222200	---NA---
														SVE_1253400	JmjC domain-containing protein		SVE_1231200	hypothetical protein
														SVE_1253900	---NA---		SVE_1245100	Nucleosomal histone kinase 1
														SVE_1265600	Astacin-like metalloendopeptidase		SVE_1247500	hypothetical protein ANCCAN_10937
														SVE_1267200	---NA---		SVE_1247900	ATP-dependent DNA helicase PIF1-like
														SVE_1273600	Hypothetical protein SRAE_X000231900		SVE_1248600	---NA---
														SVE_1273700	---NA---		SVE_1251300	---NA---
														SVE_1273800	Nucleosomal histone kinase 1		SVE_1266900	ATP-dependent DNA helicase PIF1-like
														SVE_1277700	---NA---		SVE_1273200	---NA---
														SVE_1278100	---NA---		SVE_1275800	---NA---
														SVE_1278200	---NA---		SVE_1278800	---NA---
														SVE_1278700	---NA---		SVE_1279700	reverse transcriptase
														SVE_1279000	Hypothetical protein SRAE_0000068000		SVE_1286100	RVP and zf-CCHC domain containing protein
														SVE_1279200	---NA---		SVE_1304600	Reverse transcriptase domain and Zinc finger,CCHC-type domain and Peptidase A2A, retrovirus, catalytic domain-containing protein
														SVE_1285000	Acetylcholinesterase		SVE_1306900	uncharacterized protein LOC100900389
														SVE_1285510	Astacin-like metalloendopeptidase		SVE_1307000	uncharacterized protein LOC110849876
														SVE_1302600	hypothetical protein CRE_02412		SVE_1309600	---NA---
														SVE_1306600	Reverse transcriptase domain and Integrase,catalytic core domain and Ribonuclease H domain and Ribonuclease H-like domain-containing protein		SVE_1310500	Ribonuclease H-like domain-containing protein
														SVE_1308300	---NA---		SVE_1318400	Glutamate receptor-interacting protein 1
														SVE_1309100	hypothetical protein AVEN_210286_1		SVE_1318800	---NA---
														SVE_1317400	---NA---		SVE_1333600	hypothetical protein CF328_g7912, partial
														SVE_1317500	Helicase, C-terminal domain and Helicase-associated domain and Domain of unknown function DUF1605 domain and Helicase, superfamily 1/2, ATP-binding domain and P-loop containing nucleoside triphosphate hydrolase domain-containing protein		SVE_1335200	uncharacterized protein K02A2.6-like
														SVE_1318200	---NA---		SVE_1341200	Hypothetical protein SRAE_1000058700
														SVE_1318500	---NA---		SVE_1397400	---NA---
														SVE_1318600	---NA---		SVE_1402400	Reverse transcriptase domain and Integrase,catalytic core domain and Ribonuclease H-like domain and AT hook-like family and Aspartic peptidase domain-containing protein
														SVE_1319200	Acetylcholinesterase		SVE_1417500	Retrovirus-related Pol polyprotein from transposon TNT 1-94
														SVE_1331300	Lipid-binding serum glycoprotein, C-terminal domain and Lipid-binding serum glycoprotein, N-terminal domain and Bactericidal permeability-increasing protein, alpha/beta domain-containing protein		SVE_1418500	Reverse transcriptase domain and Integrase,catalytic core domain and Ribonuclease H-like domain and AT hook-like family and Aspartic peptidase domain-containing protein
														SVE_1333300	---NA---		SVE_1431400	---NA---
														SVE_1334000	Reverse transcriptase domain and Integrase,catalytic core domain and Ribonuclease H-like domain and AT hook-like family and Aspartic peptidase domain-containing protein		SVE_1438100	hypothetical protein BSL78_08084
														SVE_1334300	---NA---		SVE_1463900	---NA---
														SVE_1335500	---NA---		SVE_1470000	DNA helicase Pif1 like family and P-loop containing nucleoside triphosphate hydrolase domain-containing protein
														SVE_1387500	Reverse transcriptase domain and Integrase,catalytic core domain and Ribonuclease H-like domain and AT hook-like family and Aspartic peptidase domain-containing protein		SVE_1481900	---NA---
														SVE_1398500	Transposon Ty3-I Gag-Pol polyprotein		SVE_1495100	Hypothetical protein SRAE_0000050700
														SVE_1402500	---NA---		SVE_1495400	---NA---
														SVE_1402900	---NA---		SVE_1495900	---NA---
														SVE_1417400	transposon Pol polyprotein		SVE_1509400	putative Transposon Ty3-I Gag-Pol polyprotein
														SVE_1417700	---NA---		SVE_1542400	Astacin-like metalloendopeptidase
														SVE_1453400	---NA---		SVE_1651700	Zinc finger, RING-type domain and Zinc finger, C2H2 domain and Zinc finger, RING/FYVE/PHD-type domain and Zinc finger C2H2-type/integrase DNA-binding domain and Zinc finger, C2H2-like domain and Zinc finger, C3HC4 RING-type domain-containing protein
														SVE_1454200	Nucleosomal histone kinase 1		SVE_1651900	---NA---
														SVE_1454300	---NA---		SVE_1663200	Integrase, catalytic core domain and Ribonuclease H-like domain-containing protein
														SVE_1473400	Acetylcholinesterase		SVE_1665400	Reverse transcriptase domain-containing protein
														SVE_1473900	---NA---		SVE_1677300	Acyl-CoA synthetase family member 2, mitochondrial
														SVE_1481100	Spectrin beta chain, erythrocytic		SVE_1697600	---NA---
														SVE_1481200	---NA---		SVE_1707100	Reverse transcriptase domain and Integrase, catalytic core domain and Zinc finger, CCHC-type domain and Peptidase A2A, retrovirus, catalytic domain and Ribonuclease H-like domain and Peptidase A2A, retrovirus RVP subgroup domain and Aspartic peptidase domain-containing protein
														SVE_1481600	---NA---		SVE_1707700	Hypothetical protein SRAE_2000482100
														SVE_1490400	---NA---		SVE_1775800	---NA---
														SVE_1496000	Reverse transcriptase domain and Integrase,catalytic core domain and Ribonuclease H-like domain-containing protein		SVE_1777400	---NA---
														SVE_1500100	Reverse transcriptase domain and Integrase,catalytic core domain and Ribonuclease H-like domain and AT hook-like family and Aspartic peptidase domain-containing protein		SVE_1777700	Reverse transcriptase domain and Integrase,catalytic core domain and Ribonuclease H-like domain and AT hook-like family and Aspartic peptidase domain-containing protein
														SVE_1526000	Reverse transcriptase domain-containing protein		SVE_1778300	---NA---
														SVE_1527900	Transposon Ty3-I Gag-Pol polyprotein		SVE_1782500	---NA---
														SVE_1534100	Serine threonine protein kinase-related domain containing protein		SVE_1782900	---NA---
														SVE_1535500	Reverse transcriptase domain and Integrase, catalytic core domain and Zinc finger, CCHC-type domain and Ribonuclease H-like domain and Aspartic peptidase domain-containing protein		SVE_1813000	Hypothetical protein SRAE_1000098600
														SVE_1535600	Reverse transcriptase domain and Integrase,catalytic core domain and Ribonuclease H-like domain and AT hook-like family and Aspartic peptidase domain-containing protein		SVE_1851800	Histone-lysine N-methyltransferase SETMAR
														SVE_1539900	Reverse transcriptase domain and Integrase, catalytic core domain and Ribonuclease H-like domain and Peptidase A2A, retrovirus RVP subgroup domain and Aspartic peptidase domain-containing protein		SVE_1917500	Density-regulated protein
														SVE_1547000	---NA---		SVE_1921400	AAA family ATPase
														SVE_1547800	---NA---		SVE_1954100	Protein-tyrosine phosphatase, receptor/non-receptor type domain and Protein-tyrosine/Dual specificity phosphatase domain and Protein-tyrosine phosphatase, catalytic domain-containing protein
														SVE_1557800	---NA---		SVE_1962400	Zinc finger, CCHC-type domain-containing protein
														SVE_1651800	Hypothetical protein SRAE_1000268700		SVE_1963500	---NA---
														SVE_1665700	Reverse transcriptase domain and Integrase, catalytic core domain and Zinc finger, CCHC-type domain and Peptidase A2A, retrovirus, catalytic domain and Ribonuclease H-like domain and Peptidase A2A, retrovirus RVP subgroup domain and Aspartic peptidase domain-containing protein		SVE_1993300	---NA---
														SVE_1666500	---NA---		SVE_2002600	---NA---
														SVE_1671300	DUF1768 domain-containing protein		SVE_2004200	---NA---
														SVE_1676800	---NA---		SVE_2017100	---NA---
														SVE_1677400	Reverse transcriptase domain and Integrase,catalytic core domain and Zinc finger, CCHC-type domain and Ribonuclease H-like domain and Aspartic peptidase domain-containing protein		SVE_2017300	---NA---
														SVE_1682100	Reverse transcriptase domain-containing protein		SVE_2018900	Density-regulated protein
														SVE_1690000	Astacin-like metalloendopeptidase		SVE_2020400	---NA---
														SVE_1695300	Barrier-to-autointegration factor		SVE_2027700	---NA---
														SVE_1695800	---NA---		SVE_2027900	Superkiller viralicidic activity 2-like 2
														SVE_1703100	---NA---		SVE_2029500	Reverse transcriptase domain
														SVE_1704000	Reverse transcriptase domain and Integrase,catalytic core domain and Ribonuclease H-like domain-containing protein
														SVE_1704100	Reverse transcriptase domain and Integrase, catalytic core domain and Zinc finger, CCHC-type domain and Ribonuclease H-like domain-containing protein
														SVE_1704500	Zinc finger, CCHC-type domain-containing protein
														SVE_1704900	Hypothetical protein SRAE_X000234600
														SVE_1705000	---NA---
														SVE_1705400	PREDICTED: uncharacterized protein K02A2.6-like
														SVE_1705700	retrotransposable element
														SVE_1706000	Reverse transcriptase domain and Integrase,catalytic core domain and Ribonuclease H-like domain-containing protein
														SVE_1706300	Reverse transcriptase domain and Integrase,catalytic core domain and Ribonuclease H-like domain and AT hook-like family and Aspartic peptidase domain-containing protein
														SVE_1706600	---NA---
														SVE_1706700	---NA---
														SVE_1741400	Cuticle collagen lon-3
														SVE_1777300	---NA---
														SVE_1780000	Reverse transcriptase domain and Integrase,catalytic core domain and Ribonuclease H-like domain and Aspartic peptidase domain-containing protein
														SVE_1780500	Reverse transcriptase domain-containing protein
														SVE_1781000	Reverse transcriptase domain and Integrase,catalytic core domain and Ribonuclease H-like domain and AT hook-like family and Aspartic peptidase domain-containing protein
														SVE_1781800	---NA---
														SVE_1847000	RNA-recognition motif (RRM) Nup35-type domain-containing protein
														SVE_1851100	mariner transposase
														SVE_1851700	Reverse transcriptase domain and Integrase,catalytic core domain and Ribonuclease H-like domain and Aspartic peptidase domain-containing protein
														SVE_1914100	Hypothetical protein SRAE_1000050300
														SVE_1918100	Hypothetical protein SRAE_0000049200
														SVE_1918300	JmjC domain-containing protein
														SVE_1918600	Hypothetical protein SRAE_0000052700
														SVE_1918900	---NA---
														SVE_1919000	---NA---
														SVE_1920700	---NA---
														SVE_1920900	---NA---
														SVE_1921500	---NA---
														SVE_1925800	Reverse transcriptase domain-containing protein
														SVE_1926300	---NA---
														SVE_1926600	hypothetical protein CAEBREN_02494
														SVE_1926900	Reverse transcriptase domain-containing protein
														SVE_1927200	---NA---
														SVE_1948500	Retrovirus-related Pol polyprotein from transposon 17.6
														SVE_1961900	---NA---
														SVE_1963100	---NA---
														SVE_1995600	unnamed protein product
														SVE_1998000	---NA---
														SVE_1998800	---NA---
														SVE_2006300	---NA---
														SVE_2007600	---NA---
														SVE_2011000	---NA---
														SVE_2013500	Protein CBG23838
														SVE_2017200	---NA---
														SVE_0031800	---NA---
														SVE_0063700	barrier-to-autointegration factor-like
														SVE_0183800	Hypothetical protein SRAE_2000039700
														SVE_0212400	protein kinase
														SVE_0218000	---NA---
														SVE_0239100	Astacin-like metalloendopeptidase
														SVE_0264000	Reverse transcriptase domain and Integrase, catalytic core domain and Ribonuclease H-like domain-containing protein
														SVE_0291100	CAP domain-containing protein
														SVE_0292300	DUF1768-domain-containing protein
														SVE_0293500	---NA---
														SVE_0307300	STAT transcription factor, all-alpha domain-containing protein
														SVE_0338800	7TM GPCR, serpentine receptor class v (Srv) family-containing protein
														SVE_0381700	CAP domain-containing protein
														SVE_0382700	---NA---
														SVE_0405300	Hypothetical protein SRAE_2000122100
														SVE_0596900	---NA---
														SVE_0604500	ATP-dependent DNA helicase PIF1-like
														SVE_0604700	---NA---
														SVE_0609400	---NA---
														SVE_0612600	---NA---
														SVE_0615500	Transposon Tf2-9 polyprotein
														SVE_0615700	Reverse transcriptase domain and Integrase, catalytic core domain and Zinc finger, CCHC-type domain and Ribonuclease H-like domain-containing protein
														SVE_0672300	CAP domain-containing protein
														SVE_0672900	CAP domain-containing protein
														SVE_0686000	Reverse transcriptase domain and Integrase, catalytic core domain and Zinc finger, CCHC-type domain and Ribonuclease H-like domain and Aspartic peptidase domain-containing protein
														SVE_0686200	---NA---
														SVE_0698300	---NA---
														SVE_0727600	Astacin-like metalloendopeptidase
														SVE_0727900	Astacin-like metalloendopeptidase
														SVE_0733900	---NA---
														SVE_0734300	ShKT domain-containing protein
														SVE_0741700	---NA---
														SVE_0768500	---NA---
														SVE_0799400	Hypothetical protein SRAE_0000050000
														SVE_0800900	ATP-dependent DNA helicase PIF1
														SVE_0812800	translation initiation factor IF-2
														SVE_0826900	Aspartic peptidase family and Aspartic peptidase domain-containing protein
														SVE_0831900	---NA---
														SVE_0859600	---NA---
														SVE_0873400	---NA---
														SVE_0915600	---NA---
														SVE_0917200	Astacin-like metalloendopeptidase
														SVE_1076000	hypothetical protein BOX15_Mlig013482g1, partial
														SVE_1087100	Hypothetical protein SRAE_1000015500
														SVE_1120900	---NA---
														SVE_1124600	---NA---
														SVE_1152800	Astacin-like metalloendopeptidase
														SVE_1153000	---NA---
														SVE_1154400	---NA---
														SVE_1247100	DSH, C-terminal domain and P-loop containing nucleoside triphosphate hydrolase domain-containing protein
														SVE_1253800	Lipid-binding serum glycoprotein, C-terminal domain and Lipid-binding serum glycoprotein, N-terminal domain and Bactericidal permeability-increasing protein, alpha/beta domain-containing protein
														SVE_1254300	hypothetical protein B7P43_G14040
														SVE_1265700	---NA---
														SVE_1266300	---NA---
														SVE_1266800	---NA---
														SVE_1278600	Reverse transcriptase domain and Integrase,catalytic core domain and Ribonuclease H domain and Ribonuclease H-like domain-containing protein
														SVE_1309400	Acetylcholinesterase
														SVE_1319100	Astacin-like metalloendopeptidase
														SVE_1330400	Reverse transcriptase domain and Integrase, catalytic core domain and Zinc finger, CCHC-type domain and Peptidase A2A, retrovirus, catalytic domain and Ribonuclease H-like domain and Peptidase A2A, retrovirus RVP subgroup domain and Aspartic peptidase domain-containing protein
														SVE_1398100	---NA---
														SVE_1398200	---NA---
														SVE_1402800	---NA---
														SVE_1453600	helicase protein
														SVE_1464300	---NA---
														SVE_1474200	---NA---
														SVE_1494700	Integrase, catalytic core domain and Ribonuclease H-like domain-containing protein
														SVE_1547600	ribonuclease HI
														SVE_1603800	guanylate kinase
														SVE_1674300	Hypothetical protein SRAE_X000234400
														SVE_1702200	Poly(A) RNA polymerase GLD2
														SVE_1705500	---NA---
														SVE_1774300	FK506-binding protein 59
														SVE_1777600	---NA---
														SVE_1780200	---NA---
														SVE_1781200	---NA---
														SVE_1852500	Armadillo-like helical domain and Armadillo-type fold domain and Ataxin-10 domain-containing protein
														SVE_1859100	Hypothetical protein SRAE_2000314200
														SVE_1896300	Hypothetical protein SRAE_1000341200
														SVE_1926800	---NA---
														SVE_1928900	Reverse transcriptase domain and Integrase,catalytic core domain and Ribonuclease H-like domain-containing protein
														SVE_1967700	Cytidyltransferase-like domain and Rossmann-like alpha/beta/alpha sandwich fold domain-containing protein
														SVE_2017700	---NA---
														SVE_2017800	---NA---
														SVE_2023000	Ribonuclease H-like domain-containing protein
														SVE_1793300	Reverse transcriptase domain-containing protein
														SVE_0002500	Hypothetical protein SRAE_1000100400
														SVE_0004300	SET domain-containing protein
														SVE_0030200	---NA---
														SVE_0042000	Lateral signaling target protein 2 homolog
														SVE_0051700	Reverse transcriptase domain and Integrase,catalytic core domain and Ribonuclease H domain and Ribonuclease H-like domain-containing protein
														SVE_0070300	CXXC-type zinc finger protein 1
														SVE_0073100	Hypothetical protein SRAE_2000080400
														SVE_0079000	Hypothetical protein SRAE_1000053900
														SVE_0079200	Maternal protein pumilio
														SVE_0081000	Zinc finger, CCHC-type domain-containing protein
														SVE_0081100	Zinc finger, CCHC-type domain-containing protein
														SVE_0082900	Hypothetical protein SRAE_1000057000
														SVE_0086000	Protein NRDE2 homolog
														SVE_0094200	Reverse transcriptase domain and Integrase,catalytic core domain and Ribonuclease H domain and Ribonuclease H-like domain-containing protein
														SVE_0150900	Cation-transporting P-type ATPase family and Cation-transporting P-type ATPase, subfamily IV and P-type ATPase, A domain and HAD-like domain and P-type ATPase, cytoplasmic domain N-containing protein
														SVE_0160100	DNA-directed RNA polymerase I subunit RPA2
														SVE_0173600	C-type lectin domain and C-type lectin-like domain and C-type lectin fold domain-containing protein
														SVE_0173800	Hypothetical protein SRAE_1000324900
														SVE_0174300	---NA---
														SVE_0174600	Hypothetical protein SRAE_X000157800
														SVE_0175600	Cytidyltransferase-like domain and Rossmann-like alpha/beta/alpha sandwich fold domain-containing protein
														SVE_0178400	Hypothetical protein SRAE_2000080700
														SVE_0189500	CID domain and RNA polymerase II-binding domain-containing protein
														SVE_0192200	tRNA-dihydrouridine(16/17) synthase [NAD(P)(+)]-like
														SVE_0198100	DNA mismatch repair protein MutS, C-terminal domain and DNA mismatch repair protein MutS, core domain and DNA mismatch repair protein MutS, clamp domain and P-loop containing nucleoside triphosphate hydrolase domain-containing protein
														SVE_0211800	NADH dehydrogenase [ubiquinone] 1 alpha subcomplex assembly factor 5
														SVE_0213900	Rac GTPase-activating protein 1
														SVE_0219200	JmjC domain-containing protein
														SVE_0220300	Hypothetical protein SRAE_1000297400
														SVE_0229300	---NA---
														SVE_0229800	Zinc finger, RanBP2-type domain-containing protein
														SVE_0229900	Hypothetical protein SRAE_1000006300
														SVE_0237200	Hypothetical protein SRAE_2000515400
														SVE_0254400	Reverse transcriptase domain and Integrase,catalytic core domain and Ribonuclease H-like domain-containing protein
														SVE_0263400	---NA---
														SVE_0277300	hypothetical protein Y032_0123g1179
														SVE_0279400	Hypothetical protein SRAE_2000080300
														SVE_0287100	Zinc finger, MIZ-type domain-containing protein
														SVE_0288200	retroposon polyprotein, putative
														SVE_0293000	uncharacterized protein B4U80_09036
														SVE_0298500	Charged multivesicular body protein 2a
														SVE_0307800	Myotubularin-related protein 5
														SVE_0311500	Eb1
														SVE_0318100	Trypsin Inhibitor-like, cysteine rich domain-containing protein
														SVE_0320700	CAP domain-containing protein
														SVE_0321500	Polynucleotide 5'-hydroxyl-kinase NOL9
														SVE_0324000	---NA---
														SVE_0325700	Homeobox domain and Homeodomain-like-containing protein
														SVE_0327200	Hypothetical protein SRAE_1000041600
														SVE_0341500	Maternal protein pumilio
														SVE_0369400	Glycoprotein-N-acetylgalactosamine 3-beta-galactosyltransferase 1
														SVE_0369500	---NA---
														SVE_0383800	Kinesin-like protein KIF2A
														SVE_0385200	Polycomb group RING finger protein 3
														SVE_0388000	Pre-mRNA-processing factor 17
														SVE_0392300	---NA---
														SVE_0399000	Rac GTPase-activating protein 1
														SVE_0402900	Zinc finger, MIZ-type domain-containing protein
														SVE_0415200	Hypothetical protein SRAE_2000194400
														SVE_0415400	Nucleoporin Nup120/160 family-containing protein
														SVE_0428900	Regulator of chromosome condensation
														SVE_0434500	RuvB-like 1
														SVE_0439000	Acidic leucine-rich nuclear phosphoprotein 32 family member A
														SVE_0444400	Zinc finger, nuclear hormone receptor-type domain and Nuclear hormone receptor, ligand-binding domain and Zinc finger, NHR/GATA-type domain-containing protein
														SVE_0449200	Aldolase-type TIM barrel domain and Glycoside hydrolase, superfamily domain and Hyaluronidase family-containing protein
														SVE_0455900	Reverse transcriptase domain and Integrase,catalytic core domain and Ribonuclease H domain and Ribonuclease H-like domain-containing protein
														SVE_0480400	membrane-associated protein gex-3
														SVE_0486400	RZZ complex, subunit zwilch family-containing protein
														SVE_0489900	Suppressor of ypt1
														SVE_0502800	Eukaryotic translation initiation factor 3 subunit I
														SVE_0516100	Zinc finger, C2H2 domain and Zinc finger, C2H2-like domain-containing protein
														SVE_0534300	Hypothetical protein SRAE_1000050300
														SVE_0535000	INO80 complex subunit D
														SVE_0554000	Hypothetical protein SRAE_2000202100
														SVE_0554100	BRCT domain-containing protein
														SVE_0557400	SWI/SNF-related matrix-associated actin-dependent regulator of chromatin subfamily D member 1
														SVE_0561300	Rho GTPase-activating protein domain and Rho GTPase activation protein domain-containing protein
														SVE_0566500	Low-density lipoprotein (LDL) receptor class A repeat-containing protein
														SVE_0578000	Phosphatidic acid phosphatase type 2/haloperoxidase domain-containing protein
														SVE_0596500	---NA---
														SVE_0601500	Nuclear RNA export factor 2
														SVE_0605700	Hypothetical protein SRAE_2000288300
														SVE_0607500	DNA helicase Pif1 like family and P-loop containing nucleoside triphosphate hydrolase domain-containing protein
														SVE_0611700	---NA---
														SVE_0627100	Astacin-like metalloendopeptidase
														SVE_0667400	Bm12134
														SVE_0672700	CAP domain-containing protein
														SVE_0672800	CAP domain-containing protein
														SVE_0675200	Astacin-like metalloendopeptidase
														SVE_0679400	Hypothetical protein SRAE_2000276500
														SVE_0682100	---NA---
														SVE_0682500	Hypothetical protein SRAE_1000081500
														SVE_0683400	Reverse transcriptase domain and Integrase, catalytic core domain and Zinc finger, CCHC-type domain and Ribonuclease H-like domain and Aspartic peptidase domain-containing protein
														SVE_0683500	ankyrin repeat domain protein 28, putative
														SVE_0686700	---NA---
														SVE_0693500	Rhodanese-like domain-containing protein
														SVE_0693700	Hypothetical protein SRAE_1000227800
														SVE_0697100	DIS3-like exonuclease 2
														SVE_0698800	Acetylcholinesterase
														SVE_0713400	Reverse transcriptase domain and Peptidase A2A,retrovirus, catalytic domain and Aspartic peptidase domain-containing protein
														SVE_0715800	Reverse transcriptase domain and Integrase,catalytic core domain and Ribonuclease H domain and Ribonuclease H-like domain-containing protein
														SVE_0723700	Astacin-like metalloendopeptidase
														SVE_0724500	ATP-dependent DNA helicase PIF1-like
														SVE_0724900	---NA---
														SVE_0728000	Astacin-like metalloendopeptidase
														SVE_0735500	putative pol protein
														SVE_0768400	---NA---
														SVE_0768800	Reverse transcriptase domain and Zinc finger,CCHC-type domain and Aspartic peptidase domain-containing protein
														SVE_0773300	N-alpha-acetyltransferase 35, NatC auxiliary subunit
														SVE_0827400	Polybromo
														SVE_0829700	Reverse transcriptase domain and Integrase, catalytic core domain and Zinc finger, CCHC-type domain and Ribonuclease H-like domain-containing protein
														SVE_0833400	Reverse transcriptase domain and Integrase,catalytic core domain and Ribonuclease H domain and Ribonuclease H-like domain-containing protein
														SVE_0838500	---NA---
														SVE_0842400	Reverse transcriptase domain and Integrase,catalytic core domain and Ribonuclease H domain and Ribonuclease H-like domain-containing protein
														SVE_0858800	Queuine tRNA-ribosyltransferase
														SVE_0864700	CAP Gly-rich domain-containing protein
														SVE_0870200	Proteasome activator complex subunit 4B
														SVE_0888000	---NA---
														SVE_0893400	CAP domain-containing protein
														SVE_0899700	---NA---
														SVE_0909400	Reverse transcriptase domain and Integrase,catalytic core domain and Ribonuclease H domain and Ribonuclease H-like domain-containing protein
														SVE_0911900	Reverse transcriptase domain and Integrase,catalytic core domain and Ribonuclease H-like domain and AT hook-like family and Aspartic peptidase domain-containing protein
														SVE_0937500	Zinc finger, PHD-type domain and Zinc finger, FYVE/PHD-type domain and Zinc finger, RING/FYVE/PHD-type domain and Zinc finger, PHD-finger domain-containing protein
														SVE_0940400	Rac GTPase-activating protein 1
														SVE_0952500	Aurora kinase B
														SVE_0953300	DDB1- and CUL4-associated factor 7
														SVE_0977500	Zinc finger, RING-type domain and Zinc finger, RING/FYVE/PHD-type domain-containing protein
														SVE_1003600	Sigma non-opioid intracellular receptor 1
														SVE_1006900	Zinc finger, MIZ-type domain-containing protein
														SVE_1007800	RING finger protein 212B isoform X2
														SVE_1020100	Zinc finger, C2H2 domain and Zinc finger, C2H2-like domain-containing protein
														SVE_1032200	---NA---
														SVE_1041500	SET domain-containing protein
														SVE_1042100	Inner nuclear membrane protein Man1
														SVE_1044200	Hypothetical protein SRAE_1000255300
														SVE_1063500	Reverse transcriptase domain and Integrase, catalytic core domain and Ribonuclease H-like domain and Peptidase A2A, retrovirus RVP subgroup domain and Aspartic peptidase domain-containing protein
														SVE_1079400	---NA---
														SVE_1083900	---NA---
														SVE_1089700	RNA polymerase-associated protein Ctr9 homolog
														SVE_1090900	Hypothetical protein SRAE_1000057600
														SVE_1094900	---NA---
														SVE_1095800	N-acetyllactosaminide beta-1,3-N-acetylglucosaminyltransferase
														SVE_1096900	Hypothetical protein SRAE_1000326200
														SVE_1102800	Zinc finger, RING-type domain and Zinc finger, RING/FYVE/PHD-type domain-containing protein
														SVE_1121700	hypothetical protein L596_011697
														SVE_1124100	PREDICTED: uncharacterized protein K02A2.6-like
														SVE_1148900	Cytidyltransferase-like domain and Rossmann-like alpha/beta/alpha sandwich fold domain-containing protein
														SVE_1150900	Hypothetical protein SRAE_2000288300
														SVE_1158400	BREX system Lon protease-like protein BrxL
														SVE_1161800	---NA---
														SVE_1187200	putative ubiquitin-like-specific protease 1B
														SVE_1195800	Ovarian tumour, otubain domain and DNA helicase Pif1 like family and Helitron helicase-like domain and P-loop containing nucleoside triphosphate hydrolase domain-containing protein
														SVE_1218000	---NA---
														SVE_1218600	---NA---
														SVE_1219000	---NA---
														SVE_1223000	Hypothetical protein SRAE_X000052000
														SVE_1223900	Mutagen-sensitive 301
														SVE_1244000	---NA---
														SVE_1245600	DSH, C-terminal domain-containing protein
														SVE_1252800	---NA---
														SVE_1254400	Retrovirus-related Pol polyprotein from transposon TNT 1-94
														SVE_1265900	Reverse transcriptase domain-containing protein
														SVE_1267300	---NA---
														SVE_1279300	Reverse transcriptase domain and Integrase,catalytic core domain and Ribonuclease H-like domain and AT hook-like family and Aspartic peptidase domain-containing protein
														SVE_1279600	---NA---
														SVE_1305900	Reverse transcriptase domain and Integrase,catalytic core domain and Ribonuclease H-like domain and AT hook-like family and Aspartic peptidase domain-containing protein
														SVE_1306400	---NA---
														SVE_1310100	LEAF RUST 10 DISEASE-RESISTANCE LOCUS RECEPTOR-LIKE PROTEIN KINASE-like 1.2
														SVE_1310400	---NA---
														SVE_1333700	---NA---
														SVE_1341500	Las1-like family-containing protein
														SVE_1341600	Las1-like family-containing protein
														SVE_1402100	---NA---
														SVE_1438200	retrotransposable element
														SVE_1439900	Acetylcholinesterase
														SVE_1453100	G1/S-specific cyclin-E
														SVE_1470200	Helitron helicase-like domain-containing protein
														SVE_1495200	Hypothetical protein SRAE_0000050600
														SVE_1495800	Hypothetical protein SRAE_X000231900
														SVE_1509000	Retrovirus-related Pol polyprotein from transposon RE1
														SVE_1525800	Reverse transcriptase domain-containing protein
														SVE_1547100	Reverse transcriptase domain and Integrase,catalytic core domain and Ribonuclease H domain and Ribonuclease H-like domain-containing protein
														SVE_1558000	Nucleosomal histone kinase 1
														SVE_1588300	Structural maintenance of chromosomes protein 4
														SVE_1608600	Galactose oxidase/kelch, beta-propeller domain and Kelch-type beta propeller domain-containing protein
														SVE_1623800	Serine/threonine-protein kinase polo
														SVE_1633000	Alpha-1,6-mannosyl-glycoprotein 2-beta-N-acetylglucosaminyltransferase
														SVE_1635100	Hypothetical protein SRAE_2000487800
														SVE_1638900	Maternal protein pumilio
														SVE_1648900	---NA---
														SVE_1654800	---NA---
														SVE_1679200	---NA---
														SVE_1694100	hypothetical protein ALQ76_200035
														SVE_1738100	28S ribosomal protein S35, mitochondrial
														SVE_1776100	---NA---
														SVE_1809500	O-phosphoseryl-tRNA(Sec) selenium transferase
														SVE_1814300	MOB kinase activator-like 4
														SVE_1818100	Farnesyl pyrophosphate synthase
														SVE_1831200	Translation initiation factor IF-2, mitochondrial
														SVE_1838200	Probable DNA mismatch repair protein Msh6
														SVE_1850000	Reverse transcriptase domain and Integrase,catalytic core domain and Ribonuclease H domain and Ribonuclease H-like domain-containing protein
														SVE_1854000	Hypothetical protein SRAE_2000043500
														SVE_1863400	Coactivator CBP, KIX domain and Mediator complex, subunit Med15, metazoa domain-containing protein
														SVE_1876200	DNA-directed primase/polymerase protein
														SVE_1878900	Nucleoporin Nup85-like family-containing protein
														SVE_1886700	Hypothetical protein SRAE_2000062800
														SVE_1911300	Protein AATF
														SVE_1912700	Hypothetical protein SRAE_1000345700
														SVE_1913000	Hypothetical protein SRAE_1000092400
														SVE_1914400	Hypothetical protein SRAE_1000293900
														SVE_1915600	Neurogenic locus notch homolog protein 1
														SVE_1920800	---NA---
														SVE_1927100	Hypothetical protein SRAE_0000050500
														SVE_1927700	---NA---
														SVE_1928400	hypothetical protein TRIADDRAFT_9925, partial
														SVE_1929000	Reverse transcriptase domain and Integrase,catalytic core domain and Ribonuclease H-like domain-containing protein
														SVE_1934600	E3 ubiquitin-protein ligase SH3RF2 isoform X2
														SVE_1963900	---NA---
														SVE_1977100	---NA---
														SVE_1995000	---NA---
														SVE_1997500	---NA---
														SVE_2015200	---NA---
														SVE_2017000	Hypothetical protein CBG04902
														SVE_0060400	Astacin-like metalloendopeptidase
														SVE_0062700	Chromo domain/shadow and SET domain and Post-SET domain and Chromo domain-like and Chromo domain-containing protein
														SVE_0064000	Bromodomain protein
														SVE_0096700	Hypothetical protein SRAE_0000050700
														SVE_0096900	---NA---
														SVE_0100700	Alpha-1,6-mannosyl-glycoprotein 2-beta-N-acetylglucosaminyltransferase
														SVE_0117500	Protein of unknown function DUF1647 family-containing protein
														SVE_0136900	Retrovirus-related Pol polyprotein from transposon 17.6
														SVE_0174500	Hypothetical protein SRAE_1000107100
														SVE_0175000	C-type lectin domain and C-type lectin-like domain and C-type lectin fold domain-containing protein
														SVE_0175300	Glycoprotein-N-acetylgalactosamine 3-beta-galactosyltransferase 1
														SVE_0175400	Cytidyltransferase-like domain and Rossmann-like alpha/beta/alpha sandwich fold domain-containing protein
														SVE_0175500	Glycoprotein-N-acetylgalactosamine 3-beta-galactosyltransferase 1
														SVE_0198700	Serine/threonine-protein kinase N2
														SVE_0239200	Astacin-like metalloendopeptidase
														SVE_0251000	Protein of unknown function DUF229 family and Alkaline phosphatase-like, alpha/beta/alpha domain and Alkaline-phosphatase-like, core domain-containing protein
														SVE_0253700	Retrovirus-related Pol polyprotein from transposon TNT 1-94
														SVE_0258800	uncharacterized protein LOC110857109
														SVE_0270400	Reverse transcriptase domain and Peptidase A2A,retrovirus, catalytic domain and Aspartic peptidase domain-containing protein
														SVE_0278400	Reverse transcriptase domain and Zinc finger, CCHC-type domain-containing protein
														SVE_0285300	Brahma associated protein 170kD
														SVE_0292800	Reverse transcriptase domain and Integrase,catalytic core domain and Ribonuclease H-like domain and AT hook-like family and Aspartic peptidase domain-containing protein
														SVE_0312500	Restin homolog
														SVE_0316600	C-type lectin domain and C-type lectin-like domain and C-type lectin fold domain-containing protein
														SVE_0326200	---NA---
														SVE_0344000	---NA---
														SVE_0347000	ShKT domain-containing protein
														SVE_0356800	---NA---
														SVE_0378500	unnamed protein product
														SVE_0391800	Acetylcholinesterase
														SVE_0395400	ATP-dependent DNA helicase pif1
														SVE_0484500	Hypothetical protein SRAE_2000100400
														SVE_0580700	DnaJ homolog subfamily C member 2
														SVE_0597100	---NA---
														SVE_0611100	---NA---
														SVE_0611200	Hypothetical protein SRAE_0000047000
														SVE_0638600	---NA---
														SVE_0667100	---NA---
														SVE_0668100	Trypsin Inhibitor-like, cysteine rich domain-containing protein
														SVE_0672500	CAP domain-containing protein
														SVE_0680700	---NA---
														SVE_0682400	Hypothetical protein SRAE_1000311200
														SVE_0683700	---NA---
														SVE_0686500	---NA---
														SVE_0722400	Reverse transcriptase domain and Integrase,catalytic core domain and Zinc finger, CCHC-type domain and Ribonuclease H-like domain and Aspartic peptidase domain-containing protein
														SVE_0723000	ATP-dependent DNA helicase PIF1
														SVE_0727800	Astacin-like metalloendopeptidase
														SVE_0734000	Astacin-like metalloendopeptidase
														SVE_0736800	PREDICTED: uncharacterized protein LOC105557350, partial
														SVE_0741000	Zinc finger, CCHC-type domain and Ribonuclease H-like domain-containing protein
														SVE_0741500	PR-1-like protein
														SVE_0742800	uncharacterized protein LOC100902978
														SVE_0798700	Astacin-like metalloendopeptidase
														SVE_0799500	---NA---
														SVE_0799600	Helicase, C-terminal domain and Helicase-associated domain and Domain of unknown function DUF1605 domain and Helicase, superfamily 1/2, ATP-binding domain and P-loop containing nucleoside triphosphate hydrolase domain-containing protein
														SVE_0799800	---NA---
														SVE_0800700	Hypothetical protein SRAE_X000140100
														SVE_0807500	Ubiquitin carboxyl-terminal hydrolase
														SVE_0827000	---NA---
														SVE_0833000	Integrase, catalytic core domain and Ribonuclease H-like domain-containing protein
														SVE_0877700	Reverse transcriptase domain and Integrase,catalytic core domain and Ribonuclease H-like domain and Aspartic peptidase domain-containing protein
														SVE_0892300	Reverse transcriptase domain and Zinc finger,CCHC-type domain and Peptidase A2A, retrovirus, catalytic domain-containing protein
														SVE_0897000	cilia- and flagella-associated protein 251-like
														SVE_0915300	Transposase, ISXO2-like domain-containing protein
														SVE_0916400	---NA---
														SVE_0934400	---NA---
														SVE_0982500	Hypothetical protein SRAE_1000151300
														SVE_1078200	Zinc finger, C2H2 domain and Zinc finger,C2H2-like domain-containing protein
														SVE_1098600	CAP domain-containing protein
														SVE_1100400	---NA---
														SVE_1102900	Cyclin-dependent kinase 1
														SVE_1117900	---NA---
														SVE_1124000	hypothetical protein CRE_20844
														SVE_1125100	Glycoprotein-N-acetylgalactosamine 3-beta-galactosyltransferase 1
														SVE_1154900	ATP-dependent DNA helicase PIF1
														SVE_1156300	unnamed protein product
														SVE_1160800	reverse transcriptase
														SVE_1165900	Zinc finger, CCHC-type domain-containing protein
														SVE_1186700	DNA helicase Pif1 like family and P-loop containing nucleoside triphosphate hydrolase domain-containing protein
														SVE_1187100	helicase-like protein
														SVE_1207900	Hypothetical protein SRAE_0000062700
														SVE_1208000	Retrovirus-related Pol polyprotein from transposon TNT 1-94
														SVE_1223300	---NA---
														SVE_1228900	---NA---
														SVE_1245800	---NA---
														SVE_1274000	Zinc finger, CCHC-type domain-containing protein
														SVE_1274800	Reverse transcriptase domain and Integrase,catalytic core domain and Zinc finger, CCHC-type domain and Ribonuclease H-like domain and Aspartic peptidase domain-containing protein
														SVE_1277300	---NA---
														SVE_1279800	copia-type polyprotein, putative
														SVE_1279900	Reverse transcriptase domain and Integrase,catalytic core domain and Ribonuclease H domain and Ribonuclease H-like domain-containing protein
														SVE_1284900	Reverse transcriptase domain and Integrase, catalytic core domain and Ribonuclease H-like domain-containing protein
														SVE_1285900	---NA---
														SVE_1286000	Transposon Ty3-G Gag-Pol polyprotein
														SVE_1306700	---NA---
														SVE_1309800	Astacin-like metalloendopeptidase
														SVE_1317200	Histone-lysine N-methyltransferase SETMAR
														SVE_1328000	---NA---
														SVE_1386300	---NA---
														SVE_1470100	DNA helicase Pif1 like family and P-loop containing nucleoside triphosphate hydrolase domain-containing protein
														SVE_1495600	Transposase, type 1 family-containing protein
														SVE_1505300	Astacin-like metalloendopeptidase
														SVE_1508900	---NA---
														SVE_1517100	Hypothetical predicted protein
														SVE_1528000	---NA---
														SVE_1650000	Serine/threonine-protein kinase haspin
														SVE_1679300	---NA---
														SVE_1685500	---NA---
														SVE_1688700	---NA---
														SVE_1697500	---NA---
														SVE_1707500	CAP domain-containing protein
														SVE_1763900	G-protein-signaling modulator 2
														SVE_1776800	Reverse transcriptase domain and Integrase,catalytic core domain and Ribonuclease H-like domain and AT hook-like family and Aspartic peptidase domain-containing protein
														SVE_1781400	ATP-dependent DNA helicase PIF1-like
														SVE_1782200	---NA---
														SVE_1782800	---NA---
														SVE_1783000	---NA---
														SVE_1885600	Probable ATP-dependent RNA helicase DDX10
														SVE_1889000	Bloom syndrome protein
														SVE_1896000	Condensin-2 complex subunit H2
														SVE_1913200	RNA polymerase-associated protein Ctr9 homolog
														SVE_1919500	Reverse transcriptase domain and Integrase,catalytic core domain and Ribonuclease H-like domain and AT hook-like family and Aspartic peptidase domain-containing protein
														SVE_1921700	ATP-dependent DNA helicase PIF1
														SVE_1992100	Aldolase-type TIM barrel domain and Glycoside hydrolase, superfamily domain and Hyaluronidase family-containing protein
														SVE_1995700	---NA---
														SVE_2009900	---NA---
